# Supplementary material
Source: PubMed Central journal article supplement (PMC4349970)
Supplement: supp_M114.039909_mcp.M114.039909-1.pdf [file supp_M114.039909_mcp.M114.039909-1.pdf]

**Table S1.** Oligonucleotides used in PCR.

| Oligo name  | Tm   | Length | Sequence                 | PCR Product (bp) | Accession no.  |
|-------------|------|--------|--------------------------|------------------|----------------|
| M-GAPDH-3-F | 79   | 22     | GTGCAGTGCCAGCCTCGTCCCG   | 111              | NM_008084.2    |
| M-GAPDH-3-R | 68.7 | 22     | CTCCACTTTGCCACTGCAAATG   |                  |                |
| hGAPDH-F    | 65.1 | 20     | CTCCTGTTCGACAGTCAGCC     | 101bp            | NM_002046.4    |
| hGAPDH-R    | 67.2 | 21     | ACCAAATCCGTTGACTCCGAC    |                  |                |
| hmGAPDH-F   | 59.2 | 18     | CCCAGAAGACTGTGGATG       | 76bp             | NM_002046.4    |
| hmGAPDH-R   | 61.8 | 18     | GCAGGGATGATGTTCTGG       |                  |                |
| mTGFB2 F1   | 66.5 | 20     | AATGGCTCTCCTTCGACGTG     | 180              | NM_009367.3    |
| mTGFB2 R1   | 66.4 | 21     | AGGTGCCATCAATACCTGCAA    |                  |                |
| hTGFB F     | 69.3 | 20     | TCTTCCCCTCCGAAAATGCC     |                  | NM_001135599   |
| hTGFB R     | 66.9 | 20     | GCTCAATCCGTTGTTCAAGC     |                  |                |
| mGDF15 F1   | 65.9 | 20     | TCCAGAGGTGAGATTGGGGT     | 155              | NM_011819.2    |
| mGDF15 R1   | 65.9 | 20     | GCTTCAGGGCCTAGTGATG      |                  |                |
| hGDF15 F    | 65.7 | 19     | GTCCGGAT ACTCACGCCAG     |                  | NM_004864      |
| hGDF15 R    | 68.7 | 20     | TCACGTCCCACGACCTTGAC     |                  |                |
| hTGFB1 F1   | 65.7 | 20     | TGGGCTCTGCTTTGTCTCTG     | 199              | NM_001130916.1 |
| hTGFB1 R1   | 60.4 | 23     | TGGTAAACCAGTAGTTGGAAGTT  |                  |                |
| hTGFB2 F1   | 67.4 | 21     | CGTTCAGAAGTCGGATGTGGA    | 87               | NM_001024847.2 |
| hTGFB2 R1   | 65.9 | 20     | TGTCTCAGTGGATGGGCAGT     |                  |                |
| hTGFB3 F1   | 67.4 | 20     | CTGGTGAAGTGGGCTTTGGA     | 116              | NM_001195683.1 |
| hTGFB3 R1   | 66.8 | 24     | TCCTCATCTCCCATCTCCTCATTA |                  |                |
| hFGF2-F     | 66.5 | 20     | GCTGTACTGCAAAAACGGGG     | 94               | NM_002006.4    |
| hFGF2-R     | 65.3 | 20     | TAGCTTGATGTGAGGGTCGC     |                  |                |
| hFGF3-F     | 64.4 | 20     | ATGCTTCGGAGCACTACAGC     | 160              | NM_005247.2    |
| hFGF3-R     | 64.8 | 20     | CCGTTACAGACACGTACCA      |                  |                |
| hFGF4-F     | 66.4 | 20     | CTATGGCTCGCCCTTCTTCA     | 120              | NM_002007.2    |
| hFGF4-R     | 68.5 | 20     | CCATTCTTGCTCAGGGCGAT     |                  |                |
| hFGF6-F     | 66.2 | 20     | GCTAGCTGGAGAGATTGCCG     | 169              | NM_020996.1    |
| hFGF6-R     | 66.2 | 21     | AATTTCCAGCAGGCTGTAGGG    |                  |                |
| hFGF7-F     | 66.5 | 24     | TGCAAAGAAAGAATGCAATGAAGA | 104              | NM_002009.3    |
| hFGF7-R     | 67.2 | 20     | TTTCCCCTCCGTTGTGTGTC     |                  |                |
| hFGF9-F     | 68.8 | 20     | AGCCGATTTGGCATTCTGGA     | 85               | NM_002010.2    |
| hFGF9-R     | 64.3 | 20     | TCCCGAGGTAGAGTCCACTG     |                  |                |
| hFGF19-F    | 64.7 | 20     | AGATCAAGGCAGTCGCTCTG     | 106              | NM_005117.2    |
| hFGF19-R    | 63.9 | 20     | GAGTACTGAAGCAGCCCCTG     |                  |                |
| hFGFR1-F    | 61.7 | 20     | GGCAGTGACACCACCTACTT     | 144              | NM_023110.2    |
| hFGFR1-R    | 66.8 | 21     | CCAATATGGAGCTACGGGCAT    |                  |                |
| hFGFR2-F    | 68.1 | 20     | CCTCAAGTTTCTCAAGGCCG     | 104              | NM_023029.2    |
| hFGFR2-R    | 65.9 | 20     | AGCACGTATATTCCCCAGCG     |                  |                |
| hFGFR3-F    | 69.7 | 19     | TACCGTGCTCAAGACGGCG      | 75               | NM_000142.4    |
| hFGFR3-R    | 65.7 | 20     | AAGGTGACGTTGTGCAAGGA     |                  |                |
| hFGFR4-F    | 66.9 | 19     | TGAGGAGGAGCCAGGAAGG      | 161              | NM_002011.3    |
| hFGFR4-R    | 64.7 | 20     | GCTCAAGCTCCACTTCTCTCA    |                  |                |
| mFGFR1-F    | 63   | 20     | GGCAGCGATACCACCTACTT     | 137              | NM_010206.2    |
| mFGFR1-R    | 64.3 | 20     | GGAGCTACAGGCCTACGGTT     |                  |                |

|             |      |    |                        |     |             |
|-------------|------|----|------------------------|-----|-------------|
| mFGFR2-F    | 67.4 | 20 | CCAGAAGAGCCACCAACCAA   | 118 | NM_000141.4 |
| mFGFR2-R    | 66.2 | 20 | TAGTCCAAGTATGATCACGGCG |     |             |
| mFGFR3-F    | 66.3 | 20 | GCGACAGGTGTCCTTGGAAT   | 96  | NM_008010.5 |
| mFGFR3-R    | 65.1 | 20 | GCCAGAACAGGACCTTCTCC   |     |             |
| mFGFR4-F    | 66.5 | 20 | GCCCGACAGTTCTCTTTGGA   | 141 | NM_008011.2 |
| mFGFR4-R    | 68.6 | 20 | TTCCCAAAGCGGATCGAGAG   |     |             |
| H-KL F1     | 69.4 | 20 | ATGGAATCGATGACGGGCTG   | 101 | NM_004795.3 |
| H-KL R1     | 64.3 | 21 | ACCATCCAGTATGTGGGCTTT  |     |             |
| M-KL F1     | 69.1 | 20 | AATCGATGATGACCCCCACG   | 96  | NM_013823.2 |
| M-KL R1     | 64.5 | 20 | TCGTCCAACACGTAGGCTTT   |     |             |
| H-KLB F1    | 62.7 | 21 | TGTTCTTAAGCCCGAGTCTGT  | 140 | NM_175737.3 |
| H-KLB R1    | 66.8 | 20 | AATCTGTGCATTGAGCGGGT   |     |             |
| M-KLB F1    | 64.6 | 21 | GACACAACCTGATCAAGGCAC  | 72  | NM_031180.2 |
| M-KLB R1    | 68.2 | 20 | CCTTCTGATGAGGGCGGAAG   |     |             |
| M-CXCL1-2-F | 64.3 | 20 | GCCTCTAACCAGTTCCAGCA   | 144 | NM_008176.3 |
| M-CXCL1-2-R | 72.9 | 20 | GCTCATTGGCGATAGGCGCC   |     |             |
| H-CXCL1-2-F | 59.6 | 21 | CTCTACCTGCACACTGTCCTA  | 151 | NM_001511.3 |
| H-CXCL1-2-R | 68.4 | 20 | GATGTTGCAGGCTCCTCAG    |     |             |
| H-CXCR2-2-F | 67.9 | 21 | CTAAGTGGCACCTGTCCTGGG  | 238 | NM_001557.3 |
| H-CXCR2-2-R | 65.3 | 21 | CAGAAGAGCAGCTGTGACCTG  |     |             |
| M-CXCR2-1-F | 57.4 | 19 | GCTGATACTCACAACAGCA    | 112 | NM_009909.3 |
| M-CXCR2-1-R | 60.8 | 19 | GCACTTCTCATTGTGGAC     |     |             |
