# Supplementary material
Source: PubMed Central journal article supplement (PMC4349970)
Supplement: supp_M114.039909_mcp.M114.039909-2.pdf [file supp_M114.039909_mcp.M114.039909-2.pdf]

RI NSF/EPSCoR Proteomics Facility  
 Mass Spectrometry Report  
 Protein Groups and Peptide-Spectrum Matches (PSMs)

Sample: Ctr 30  
 Researcher: Djuro Josic  
 Data collected: 24 Aug 2011  
 Results filtering: Unique PSMs; MOWSE Score > 47.1

MS data file: Ctr\_30\_082511\_190846.raw  
 Instrument type: ESI-FTICR  
 Search engine: Mascot  
 Parameter file: N/D  
 Search database: N/D (269577 entries)  
 Enzyme specificity: Trypsin (2 missed cleavages allowed)  
 MS mass tolerance: 20 ppm; MS/MS tolerance 0.5 Da  
 Fixed modifications: Carbamidomethyl (C)  
 Var. modifications: [1] Oxidation (M)  
 Number of spectra: 4434  
 Input PSMs: 145 'Target'; 2 'Decoy'; 1.4% FDR  
 Output PSMs: 145

| UniProt Human Protein IDs |                  |                                                                   |               |             |                                                          |            |               |  |
|---------------------------|------------------|-------------------------------------------------------------------|---------------|-------------|----------------------------------------------------------|------------|---------------|--|
| Grp Nr.                   | Accession Number | Protein Name                                                      | Protein Score | Unique PSMs | PSM Serial Nrs.                                          | Other Grp. | % Seq. Cover. |  |
| 1                         | Q53H26           | Transferrin variant (Fragment) OS=Homo sapiens PE=2 SV=1          | 1059.30       | 16          | 23 33 38 41 42 47 68 74 80 97<br>102 111 132 136 138 142 |            | 43.3          |  |
|                           | Q06AH7           | Transferrin OS=Homo sapiens GN=TF PE=2 SV=1                       | 1059.30       | 16          | 23 33 38 41 42 47 68 74 80 97<br>102 111 132 136 138 142 |            | 43.3          |  |
|                           | P02787           | Serotransferrin OS=Homo sapiens GN=TF PE=1 SV=3                   | 1059.30       | 16          | 23 33 38 41 42 47 68 74 80 97<br>102 111 132 136 138 142 |            | 43.3          |  |
| 2                         | P04264           | Keratin, type II cytoskeletal 1 OS=Homo sapiens GN=KRT1 PE=1 SV=6 | 699.14        | 11          | 3 5 26 44 61 69 85 107 113 120<br>126                    |            | 24.5          |  |

|    |        |                                                                                                                      |        |    |                                    |  |      |
|----|--------|----------------------------------------------------------------------------------------------------------------------|--------|----|------------------------------------|--|------|
|    | H6VRG3 | Keratin 1 OS=Homo sapiens GN=KRT1 PE=3 SV=1                                                                          | 699.14 | 11 | 3 5 26 44 61 69 85 107 113 120 126 |  | 24.5 |
|    | H6VRG2 | Keratin 1 OS=Homo sapiens GN=KRT1 PE=3 SV=1                                                                          | 699.14 | 11 | 3 5 26 44 61 69 85 107 113 120 126 |  | 24.5 |
|    | H6VRG1 | Keratin 1 OS=Homo sapiens GN=KRT1 PE=2 SV=1                                                                          | 699.14 | 11 | 3 5 26 44 61 69 85 107 113 120 126 |  | 24.5 |
|    | H6VRG0 | Keratin 1 OS=Homo sapiens GN=KRT1 PE=3 SV=1                                                                          | 699.14 | 11 | 3 5 26 44 61 69 85 107 113 120 126 |  | 24.5 |
|    | H6VRF9 | Keratin 1 OS=Homo sapiens GN=KRT1 PE=3 SV=1                                                                          | 699.14 | 11 | 3 5 26 44 61 69 85 107 113 120 126 |  | 24.5 |
|    | H6VRF8 | Keratin 1 OS=Homo sapiens GN=KRT1 PE=3 SV=1                                                                          | 699.14 | 11 | 3 5 26 44 61 69 85 107 113 120 126 |  | 24.5 |
| 3  | P35527 | Keratin, type I cytoskeletal 9 OS=Homo sapiens GN=KRT9 PE=1 SV=3                                                     | 531.98 | 6  | 25 32 79 98 104 109                |  | 21.7 |
| 4  | P13645 | Keratin, type I cytoskeletal 10 OS=Homo sapiens GN=KRT10 PE=1 SV=6                                                   | 486.54 | 7  | 35 48 49 78 95 108 110             |  | 18.7 |
| 5  | Q5TCU3 | Tropomyosin beta chain OS=Homo sapiens GN=TPM2 PE=2 SV=1                                                             | 381.37 | 5  | 12 75 125 127 131                  |  | 27.5 |
| 6  | P02533 | Keratin, type I cytoskeletal 14 OS=Homo sapiens GN=KRT14 PE=1 SV=4                                                   | 373.13 | 6  | 28 86 89 116 140 143               |  | 19.7 |
| 7  | P35908 | Keratin, type II cytoskeletal 2 epidermal OS=Homo sapiens GN=KRT2 PE=1 SV=2                                          | 307.43 | 4  | 1 7 55 103                         |  | 17.7 |
| 8  | Q5T8M8 | Actin, alpha skeletal muscle OS=Homo sapiens GN=ACTA1 PE=4 SV=1                                                      | 299.37 | 4  | 34 36 67 101                       |  | 25.8 |
|    | P68133 | Actin, alpha skeletal muscle OS=Homo sapiens GN=ACTA1 PE=1 SV=1                                                      | 299.37 | 4  | 34 36 67 101                       |  | 25.8 |
|    | P68032 | Actin, alpha cardiac muscle 1 OS=Homo sapiens GN=ACTC1 PE=1 SV=1                                                     | 299.37 | 4  | 34 36 67 101                       |  | 25.8 |
|    | B7Z6P1 | cDNA FLJ53662, highly similar to Actin, alpha skeletal muscle OS=Homo sapiens PE=2 SV=1                              | 299.37 | 4  | 34 36 67 101                       |  | 25.8 |
|    | A8K3K1 | cDNA FLJ78096, highly similar to Homo sapiens actin, alpha, cardiac muscle (ACTC), mRNA OS=Homo sapiens PE=2 SV=1    | 299.37 | 4  | 34 36 67 101                       |  | 25.8 |
|    | A6NL76 | Actin, alpha skeletal muscle OS=Homo sapiens GN=ACTA1 PE=2 SV=2                                                      | 299.37 | 4  | 34 36 67 101                       |  | 25.8 |
| 9  | Q5RKT7 | Ribosomal protein S27a OS=Homo sapiens GN=RPS27A PE=2 SV=1                                                           | 212.50 | 4  | 17 45 87 139                       |  | 34.0 |
|    | P62979 | Ubiquitin-40S ribosomal protein S27a OS=Homo sapiens GN=RPS27A PE=1 SV=2                                             | 212.50 | 4  | 17 45 87 139                       |  | 34.0 |
|    | B2RDW1 | Ribosomal protein S27a, isoform CRA_c OS=Homo sapiens GN=RPS27A PE=2 SV=1                                            | 212.50 | 4  | 17 45 87 139                       |  | 34.0 |
| 10 | P11021 | 78 kDa glucose-regulated protein OS=Homo sapiens GN=HSPA5 PE=1 SV=2                                                  | 200.02 | 3  | 18 77 90                           |  | 12.7 |
| 11 | Q5JQ13 | Vinculin (Fragment) OS=Homo sapiens GN=VCL PE=2 SV=1                                                                 | 199.90 | 3  | 11 30 84                           |  | 7.4  |
|    | P18206 | Vinculin OS=Homo sapiens GN=VCL PE=1 SV=4                                                                            | 199.90 | 3  | 11 30 84                           |  | 7.4  |
|    | B4E3Q9 | cDNA FLJ59659, highly similar to Vinculin OS=Homo sapiens PE=2 SV=1                                                  | 199.90 | 3  | 11 30 84                           |  | 7.4  |
|    | B3KXA2 | cDNA FLJ45031 fis, clone BRAWH3018548, highly similar to Vinculin OS=Homo sapiens PE=2 SV=1                          | 199.90 | 3  | 11 30 84                           |  | 7.4  |
| 12 | Q53GZ6 | Heat shock 70kDa protein 8 isoform 1 variant (Fragment) OS=Homo sapiens PE=2 SV=1                                    | 198.62 | 3  | 19 63 114                          |  | 11.1 |
|    | P11142 | Heat shock cognate 71 kDa protein OS=Homo sapiens GN=HSPA8 PE=1 SV=1                                                 | 198.62 | 3  | 19 63 114                          |  | 11.1 |
|    | E9PKE3 | Heat shock cognate 71 kDa protein OS=Homo sapiens GN=HSPA8 PE=2 SV=1                                                 | 198.62 | 3  | 19 63 114                          |  | 11.1 |
|    | B3KTV0 | cDNA FLJ38781 fis, clone LIVER2000216, highly similar to HEAT SHOCK COGNATE 71 kDa PROTEIN OS=Homo sapiens PE=2 SV=1 | 198.62 | 3  | 19 63 114                          |  | 11.1 |
| 13 | Q53HU8 | Vimentin variant (Fragment) OS=Homo sapiens PE=2 SV=1                                                                | 183.47 | 3  | 56 66 70                           |  | 18.8 |
|    | P08670 | Vimentin OS=Homo sapiens GN=VIM PE=1 SV=4                                                                            | 183.47 | 3  | 56 66 70                           |  | 18.8 |
|    | B3KRK8 | cDNA FLJ34494 fis, clone HLUNG2005030, highly similar to VIMENTIN OS=Homo sapiens PE=2 SV=1                          | 183.47 | 3  | 56 66 70                           |  | 18.8 |
|    | B0YJC4 | Vimentin OS=Homo sapiens GN=VIM PE=3 SV=1                                                                            | 183.47 | 3  | 56 66 70                           |  | 18.8 |
| 14 | P08779 | Keratin, type I cytoskeletal 16 OS=Homo sapiens GN=KRT16 PE=1 SV=4                                                   | 175.13 | 3  | 2 93 144                           |  | 19.9 |
| 15 | Q6ZN40 | Tropomyosin 1 (Alpha), isoform CRA_f OS=Homo sapiens GN=TPM1 PE=2 SV=1                                               | 173.88 | 3  | 73 92 129                          |  | 21.8 |

|    |        |                                                                                                                                                                                   |        |   |          |  |      |
|----|--------|-----------------------------------------------------------------------------------------------------------------------------------------------------------------------------------|--------|---|----------|--|------|
| 16 | P13647 | Keratin, type II cytoskeletal 5 OS=Homo sapiens GN=KRT5 PE=1 SV=3                                                                                                                 | 172.65 | 3 | 6 39 112 |  | 11.5 |
| 17 | Q56G89 | Serum albumin OS=Homo sapiens PE=2 SV=1                                                                                                                                           | 151.45 | 2 | 50 100   |  | 12.2 |
|    | P02768 | Serum albumin OS=Homo sapiens GN=ALB PE=1 SV=2                                                                                                                                    | 151.45 | 2 | 50 100   |  | 12.2 |
|    | F6KPG5 | Albumin (Fragment) OS=Homo sapiens PE=2 SV=1                                                                                                                                      | 151.45 | 2 | 50 100   |  | 12.2 |
|    | B2RBS8 | cDNA, FLJ95666, highly similar to Homo sapiens albumin (ALB), mRNA OS=Homo sapiens PE=2 SV=1                                                                                      | 151.45 | 2 | 50 100   |  | 12.2 |
| 18 | Q5VU66 | Tropomyosin alpha-3 chain OS=Homo sapiens GN=TPM3 PE=4 SV=1                                                                                                                       | 148.17 | 2 | 40 118   |  | 27.4 |
|    | B2RDE1 | cDNA, FLJ96568, highly similar to Homo sapiens tropomyosin 3 (TPM3), mRNA OS=Homo sapiens PE=2 SV=1                                                                               | 148.17 | 2 | 40 118   |  | 27.4 |
| 19 | Q6FI52 | TAGLN protein OS=Homo sapiens GN=TAGLN PE=2 SV=1                                                                                                                                  | 127.85 | 2 | 51 60    |  | 21.9 |
|    | Q5U0D2 | Putative uncharacterized protein DKFZp686P11128 OS=Homo sapiens GN=TAGLN PE=2 SV=1                                                                                                | 127.85 | 2 | 51 60    |  | 21.9 |
|    | Q53GC9 | Transgelin variant (Fragment) OS=Homo sapiens PE=2 SV=1                                                                                                                           | 127.85 | 2 | 51 60    |  | 21.9 |
|    | Q01995 | Transgelin OS=Homo sapiens GN=TAGLN PE=1 SV=4                                                                                                                                     | 127.85 | 2 | 51 60    |  | 21.9 |
| 20 | P04075 | Fructose-bisphosphate aldolase A OS=Homo sapiens GN=ALDOA PE=1 SV=2                                                                                                               | 126.08 | 2 | 58 64    |  | 12.2 |
|    | J3KPS3 | Fructose-bisphosphate aldolase OS=Homo sapiens GN=ALDOA PE=3 SV=1                                                                                                                 | 126.08 | 2 | 58 64    |  | 12.2 |
|    | H3BUH7 | Fructose-bisphosphate aldolase A (Fragment) OS=Homo sapiens GN=ALDOA PE=2 SV=1                                                                                                    | 126.08 | 2 | 58 64    |  | 12.2 |
|    | H3BQN4 | Fructose-bisphosphate aldolase OS=Homo sapiens GN=ALDOA PE=2 SV=1                                                                                                                 | 126.08 | 2 | 58 64    |  | 12.2 |
|    | H3BPS8 | Fructose-bisphosphate aldolase A (Fragment) OS=Homo sapiens GN=ALDOA PE=2 SV=1                                                                                                    | 126.08 | 2 | 58 64    |  | 12.2 |
| 21 | P63104 | 14-3-3 protein zeta/delta OS=Homo sapiens GN=YWHAZ PE=1 SV=1                                                                                                                      | 104.31 | 1 | 81       |  | 12.2 |
|    | E7EX29 | 14-3-3 protein zeta/delta (Fragment) OS=Homo sapiens GN=YWHAZ PE=2 SV=1                                                                                                           | 104.31 | 1 | 81       |  | 12.2 |
|    | E7ESK7 | 14-3-3 protein zeta/delta (Fragment) OS=Homo sapiens GN=YWHAZ PE=2 SV=1                                                                                                           | 104.31 | 1 | 81       |  | 12.2 |
|    | D0PNI1 | Tyrosine 3-monooxygenase/tryptophan 5-monooxygenase activation protein zeta polypeptide OS=Homo sapiens GN=YWHAZ PE=2 SV=1                                                        | 104.31 | 1 | 81       |  | 12.2 |
| 22 | P17540 | Creatine kinase S-type, mitochondrial OS=Homo sapiens GN=CKMT2 PE=1 SV=2                                                                                                          | 103.55 | 2 | 16 46    |  | 10.7 |
|    | B3KVA7 | cDNA FLJ16309 fis, clone SKMUS2007816, highly similar to Creatine kinase, sarcomeric mitochondrial (EC 2.7.3.2) OS=Homo sapiens PE=2 SV=1                                         | 103.55 | 2 | 16 46    |  | 10.7 |
|    | B2R8A3 | cDNA, FLJ93805, highly similar to Homo sapiens creatine kinase, mitochondrial 2 (sarcomeric) (CKMT2), nuclear gene encoding mitochondrial protein, mRNA OS=Homo sapiens PE=2 SV=1 | 103.55 | 2 | 16 46    |  | 10.7 |
| 23 | Q6FHV6 | ENO2 protein OS=Homo sapiens GN=ENO2 PE=2 SV=1                                                                                                                                    | 98.20  | 2 | 9 133    |  | 9.7  |
|    | P09104 | Gamma-enolase OS=Homo sapiens GN=ENO2 PE=1 SV=3                                                                                                                                   | 98.20  | 2 | 9 133    |  | 9.7  |
|    | B7Z2X9 | Enolase OS=Homo sapiens GN=ENO2 PE=2 SV=1                                                                                                                                         | 98.20  | 2 | 9 133    |  | 9.7  |
| 24 | Q9UNM1 | Chaperonin 10-related protein (Fragment) OS=Homo sapiens GN=EPFP1 PE=2 SV=1                                                                                                       | 92.98  | 1 | 119      |  | 13.9 |
|    | P61604 | 10 kDa heat shock protein, mitochondrial OS=Homo sapiens GN=HSPE1 PE=1 SV=2                                                                                                       | 92.98  | 1 | 119      |  | 13.9 |
|    | B8ZZL8 | 10 kDa heat shock protein, mitochondrial OS=Homo sapiens GN=HSPE1 PE=3 SV=1                                                                                                       | 92.98  | 1 | 119      |  | 13.9 |
| 25 | P00441 | Superoxide dismutase [Cu-Zn] OS=Homo sapiens GN=SOD1 PE=1 SV=2                                                                                                                    | 90.13  | 1 | 62       |  | 8.9  |
|    | H7BYH4 | Superoxide dismutase [Cu-Zn] OS=Homo sapiens GN=SOD1 PE=2 SV=1                                                                                                                    | 90.13  | 1 | 62       |  | 8.9  |
| 26 | P12883 | Myosin-7 OS=Homo sapiens GN=MYH7 PE=1 SV=5                                                                                                                                        | 88.18  | 1 | 15       |  | 4.1  |
|    | A5YM51 | MYH7 protein (Fragment) OS=Homo sapiens GN=MYH7 PE=2 SV=1                                                                                                                         | 88.18  | 1 | 15       |  | 4.1  |
| 27 | B4E3P1 | cDNA FLJ57036, highly similar to Homo sapiens tropomyosin 2 (beta) (TPM2), transcript variant 2, mRNA OS=Homo sapiens PE=2 SV=1                                                   | 83.27  | 1 | 72       |  | 20.8 |
| 28 | P30086 | Phosphatidylethanolamine-binding protein 1 OS=Homo sapiens GN=PEBP1 PE=1 SV=3                                                                                                     | 79.86  | 1 | 83       |  | 16.0 |
|    | D9IAI1 | Phosphatidylethanolamine-binding protein 1 OS=Homo sapiens PE=2 SV=1                                                                                                              | 79.86  | 1 | 83       |  | 16.0 |

|    |        |                                                                                  |       |   |     |  |      |
|----|--------|----------------------------------------------------------------------------------|-------|---|-----|--|------|
| 29 | Q5I6Y6 | Lamin A/C transcript variant 1 OS=Homo sapiens GN=LMNA PE=2 SV=1                 | 76.53 | 1 | 130 |  | 1.6  |
|    | Q5I6Y4 | Lamin A/C transcript variant 1 OS=Homo sapiens GN=LMNA PE=2 SV=1                 | 76.53 | 1 | 130 |  | 21.8 |
|    | P02545 | Prelamin-A/C OS=Homo sapiens GN=LMNA PE=1 SV=1                                   | 76.53 | 1 | 130 |  | 1.6  |
| 30 | Q8TCD0 | Putative uncharacterized protein OS=Homo sapiens PE=2 SV=1                       | 74.67 | 1 | 21  |  | 9.1  |
|    | Q7Z3Y4 | Putative uncharacterized protein OS=Homo sapiens PE=1 SV=1                       | 74.67 | 1 | 21  |  | 9.1  |
|    | Q6PJF2 | IGK@ protein OS=Homo sapiens GN=IGK@ PE=1 SV=1                                   | 74.67 | 1 | 21  |  | 9.1  |
|    | Q6PIL8 | IGK@ protein OS=Homo sapiens GN=IGK@ PE=1 SV=1                                   | 74.67 | 1 | 21  |  | 9.1  |
|    | Q6P5S8 | IGK@ protein OS=Homo sapiens GN=IGK@ PE=1 SV=1                                   | 74.67 | 1 | 21  |  | 9.1  |
|    | Q6GMX0 | Putative uncharacterized protein OS=Homo sapiens PE=2 SV=1                       | 74.67 | 1 | 21  |  | 9.1  |
|    | Q5EFE6 | Anti-RhD monoclonal T125 kappa light chain (Precursor) OS=Homo sapiens PE=2 SV=1 | 74.67 | 1 | 21  |  | 9.1  |
|    | Q0KKI6 | Immunoglobulin light chain (Fragment) OS=Homo sapiens PE=2 SV=1                  | 74.67 | 1 | 21  |  | 9.1  |
|    | P01834 | Ig kappa chain C region OS=Homo sapiens GN=IGKC PE=1 SV=1                        | 74.67 | 1 | 21  |  | 9.1  |
| 31 | Q9Y490 | Talin-1 OS=Homo sapiens GN=TLN1 PE=1 SV=3                                        | 73.83 | 1 | 141 |  | 0.6  |
|    | Q5TCU6 | Talin-1 OS=Homo sapiens GN=TLN1 PE=2 SV=1                                        | 73.83 | 1 | 141 |  | 0.6  |
| 32 | H0YNC7 | Tropomyosin alpha-1 chain (Fragment) OS=Homo sapiens GN=TPM1 PE=3 SV=1           | 72.91 | 1 | 88  |  | 22.9 |
| 33 | P27348 | 14-3-3 protein theta OS=Homo sapiens GN=YWHAQ PE=1 SV=1                          | 68.62 | 1 | 22  |  | 12.8 |
|    | E9PG15 | 14-3-3 protein theta (Fragment) OS=Homo sapiens GN=YWHAQ PE=2 SV=1               | 68.62 | 1 | 22  |  | 12.8 |

## UniProt Human Protein IDs, cont.

| Grp Nr. | Accession Number | Protein Name                                                                                                         | Protein Score | Unique PSMs | PSM Serial Nrs. | Other Grp. | % Seq. Cover. |
|---------|------------------|----------------------------------------------------------------------------------------------------------------------|---------------|-------------|-----------------|------------|---------------|
| 34      | Q8N1C8           | HSPA9 protein (Fragment) OS=Homo sapiens GN=HSPA9 PE=2 SV=1                                                          | 65.84         | 1           | 122             |            | 3.4           |
|         | P38646           | Stress-70 protein, mitochondrial OS=Homo sapiens GN=HSPA9 PE=1 SV=2                                                  | 65.84         | 1           | 122             |            | 3.4           |
|         | B7Z4V2           | cDNA FLJ51907, highly similar to Stress-70 protein, mitochondrial OS=Homo sapiens PE=2 SV=1                          | 65.84         | 1           | 122             |            | 3.4           |
|         | B7Z4T3           | cDNA FLJ51903, highly similar to Stress-70 protein, mitochondrial OS=Homo sapiens PE=2 SV=1                          | 65.84         | 1           | 122             |            | 3.4           |
|         | A1XP52           | Catecholamine-regulated protein 40 OS=Homo sapiens PE=2 SV=1                                                         | 65.84         | 1           | 122             |            | 3.4           |
| 35      | P16870           | Carboxypeptidase E OS=Homo sapiens GN=CPE PE=1 SV=1                                                                  | 65.49         | 1           | 124             |            | 2.4           |
|         | D6RF88           | Carboxypeptidase E (Fragment) OS=Homo sapiens GN=CPE PE=2 SV=1                                                       | 65.49         | 1           | 124             |            | 2.4           |
|         | D6R930           | Carboxypeptidase E (Fragment) OS=Homo sapiens GN=CPE PE=2 SV=1                                                       | 65.49         | 1           | 124             |            | 2.4           |
|         | C9JE88           | Carboxypeptidase E (Fragment) OS=Homo sapiens GN=CPE PE=2 SV=2                                                       | 65.49         | 1           | 124             |            | 2.4           |
|         | B3KXD3           | cDNA FLJ45230 fis, clone BRCAN2021325, highly similar to Carboxypeptidase E (EC 3.4.17.10) OS=Homo sapiens PE=2 SV=1 | 65.49         | 1           | 124             |            | 2.4           |
| 36      | Q6FH91           | TNNC1 protein OS=Homo sapiens GN=TNNC1 PE=2 SV=1                                                                     | 64.57         | 1           | 135             |            | 11.2          |
|         | P63316           | Troponin C, slow skeletal and cardiac muscles OS=Homo sapiens GN=TNNC1 PE=1 SV=1                                     | 64.57         | 1           | 135             |            | 11.2          |
| 37      | J3KN67           | Tropomyosin alpha-3 chain OS=Homo sapiens GN=TPM3 PE=3 SV=1                                                          | 64.23         | 1           | 94              |            | 19.3          |
| 38      | B4DUW4           | Small ubiquitin-related modifier 3 OS=Homo sapiens GN=SUMO3 PE=2 SV=1                                                | 63.89         | 1           | 29              |            | 22.0          |
| 39      | Q59GX5           | L-plastin variant (Fragment) OS=Homo sapiens PE=2 SV=1                                                               | 63.71         | 1           | 128             |            | 1.6           |

|    |        |                                                                                                                             |       |   |     |  |      |
|----|--------|-----------------------------------------------------------------------------------------------------------------------------|-------|---|-----|--|------|
|    | Q53F11 | L-plastin variant (Fragment) OS=Homo sapiens PE=2 SV=1                                                                      | 63.71 | 1 | 128 |  | 1.6  |
|    | P13796 | Plastin-2 OS=Homo sapiens GN=LCP1 PE=1 SV=6                                                                                 | 63.71 | 1 | 128 |  | 1.6  |
| 40 | Q53FC7 | Heat shock 70kDa protein 6 (HSP70B~) variant (Fragment) OS=Homo sapiens PE=2 SV=1                                           | 63.20 | 1 | 137 |  | 6.4  |
|    | P17066 | Heat shock 70 kDa protein 6 OS=Homo sapiens GN=HSPA6 PE=1 SV=2                                                              | 63.20 | 1 | 137 |  | 6.4  |
|    | B3KSM6 | cDNA FLJ36606 fis, clone TRACH2015654, highly similar to HEAT SHOCK 70 kDa PROTEIN 6 OS=Homo sapiens PE=2 SV=1              | 63.20 | 1 | 137 |  | 6.4  |
|    | B2R6X5 | cDNA, FLJ93166, highly similar to Homo sapiens heat shock 70kDa protein 6 (HSP70B~) (HSPA6), mRNA OS=Homo sapiens PE=2 SV=1 | 63.20 | 1 | 137 |  | 6.4  |
| 41 | Q9BZ93 | Prosome P27K protein (Fragment) OS=Homo sapiens GN=PSMA6 PE=2 SV=1                                                          | 62.76 | 1 | 91  |  | 6.4  |
|    | P60900 | Proteasome subunit alpha type-6 OS=Homo sapiens GN=PSMA6 PE=1 SV=1                                                          | 62.76 | 1 | 91  |  | 6.4  |
|    | G3V5Z7 | Proteasome subunit alpha type OS=Homo sapiens GN=PSMA6 PE=2 SV=1                                                            | 62.76 | 1 | 91  |  | 6.4  |
|    | G3V3U4 | Proteasome subunit alpha type OS=Homo sapiens GN=PSMA6 PE=2 SV=1                                                            | 62.76 | 1 | 91  |  | 6.4  |
|    | G3V311 | Proteasome subunit alpha type OS=Homo sapiens GN=PSMA6 PE=2 SV=1                                                            | 62.76 | 1 | 91  |  | 6.4  |
|    | G3V295 | Proteasome subunit alpha type OS=Homo sapiens GN=PSMA6 PE=2 SV=1                                                            | 62.76 | 1 | 91  |  | 6.4  |
|    | B4DXJ9 | Proteasome (Prosome, macropain) subunit, alpha type, 6, isoform CRA_a OS=Homo sapiens GN=PSMA6 PE=2 SV=1                    | 62.76 | 1 | 91  |  | 6.4  |
| 42 | H0YN42 | Annexin (Fragment) OS=Homo sapiens GN=ANXA2 PE=2 SV=1                                                                       | 62.34 | 1 | 52  |  | 21.9 |
| 43 | Q86Z22 | Putative uncharacterized protein OS=Homo sapiens PE=2 SV=1                                                                  | 61.51 | 1 | 31  |  | 3.9  |
|    | D3DPK5 | SH3 domain binding glutamic acid-rich protein like 3, isoform CRA_a (Fragment) OS=Homo sapiens GN=SH3BGL3 PE=2 SV=1         | 61.51 | 1 | 31  |  | 3.9  |
| 44 | P02790 | Hemopexin OS=Homo sapiens GN=HPX PE=1 SV=2                                                                                  | 61.47 | 1 | 57  |  | 12.6 |
| 45 | Q53GD8 | Peptidyl-prolyl cis-trans isomerase (Fragment) OS=Homo sapiens PE=2 SV=1                                                    | 59.79 | 1 | 37  |  | 4.9  |
|    | Q00688 | Peptidyl-prolyl cis-trans isomerase FKBP3 OS=Homo sapiens GN=FKBP3 PE=1 SV=1                                                | 59.79 | 1 | 37  |  | 4.9  |
| 46 | P22626 | Heterogeneous nuclear ribonucleoproteins A2/B1 OS=Homo sapiens GN=HNRNPA2B1 PE=1 SV=2                                       | 59.73 | 1 | 76  |  | 27.5 |
| 47 | Q53GX6 | Nucleobindin 1 variant (Fragment) OS=Homo sapiens PE=2 SV=1                                                                 | 58.84 | 1 | 121 |  | 8.8  |
|    | Q02818 | Nucleobindin-1 OS=Homo sapiens GN=NUCB1 PE=1 SV=4                                                                           | 58.84 | 1 | 121 |  | 8.8  |
|    | B4DZX0 | cDNA FLJ52898, highly similar to Nucleobindin-1 OS=Homo sapiens PE=2 SV=1                                                   | 58.84 | 1 | 121 |  | 8.8  |
|    | A8K7Q1 | cDNA FLJ77770, highly similar to Homo sapiens nucleobindin 1 (NUCB1), mRNA OS=Homo sapiens PE=2 SV=1                        | 58.84 | 1 | 121 |  | 8.8  |
| 48 | P19013 | Keratin, type II cytoskeletal 4 OS=Homo sapiens GN=KRT4 PE=1 SV=4                                                           | 58.15 | 1 | 13  |  | 4.1  |
|    | F5H8K9 | Keratin, type II cytoskeletal 4 OS=Homo sapiens GN=KRT4 PE=2 SV=1                                                           | 58.15 | 1 | 13  |  | 4.1  |
|    | B4DRW1 | cDNA FLJ55805, highly similar to Keratin, type II cytoskeletal 4 OS=Homo sapiens PE=2 SV=1                                  | 58.15 | 1 | 13  |  | 4.1  |
|    | B4DRS2 | cDNA FLJ58275, highly similar to Keratin, type II cytoskeletal 4 OS=Homo sapiens PE=2 SV=1                                  | 58.15 | 1 | 13  |  | 4.1  |
|    | B4DRR7 | cDNA FLJ59399, highly similar to Keratin, type II cytoskeletal 4 OS=Homo sapiens PE=2 SV=1                                  | 58.15 | 1 | 13  |  | 4.1  |
|    | B4DKJ0 | cDNA FLJ58539, highly similar to Keratin, type II cytoskeletal 4 OS=Homo sapiens PE=2 SV=1                                  | 58.15 | 1 | 13  |  | 4.1  |
| 49 | B7Z722 | Tropomyosin 1 (Alpha), isoform CRA_i OS=Homo sapiens GN=TPM1 PE=2 SV=1                                                      | 58.08 | 1 | 59  |  | 24.2 |
| 50 | Q0QEN7 | ATP synthase subunit beta (Fragment) OS=Homo sapiens GN=ATP5B PE=2 SV=1                                                     | 57.82 | 1 | 54  |  | 5.4  |
|    | P06576 | ATP synthase subunit beta, mitochondrial OS=Homo sapiens GN=ATP5B PE=1 SV=3                                                 | 57.82 | 1 | 54  |  | 5.4  |
|    | F8W079 | ATP synthase subunit beta, mitochondrial (Fragment) OS=Homo sapiens GN=ATP5B PE=2 SV=1                                      | 57.82 | 1 | 54  |  | 5.4  |

|    |        |                                                                                                                              |       |   |     |  |      |
|----|--------|------------------------------------------------------------------------------------------------------------------------------|-------|---|-----|--|------|
|    | F8VQY0 | ATP synthase subunit beta, mitochondrial (Fragment) OS=Homo sapiens GN=ATP5B PE=2 SV=1                                       | 57.82 | 1 | 54  |  | 5.4  |
|    | F8VPV9 | ATP synthase subunit beta OS=Homo sapiens GN=ATP5B PE=2 SV=1                                                                 | 57.82 | 1 | 54  |  | 5.4  |
| 51 | P13646 | Keratin, type I cytoskeletal 13 OS=Homo sapiens GN=KRT13 PE=1 SV=4                                                           | 56.24 | 1 | 117 |  | 8.7  |
|    | K7ERE3 | Keratin, type I cytoskeletal 13 OS=Homo sapiens GN=KRT13 PE=3 SV=1                                                           | 56.24 | 1 | 117 |  | 8.7  |
|    | A8K2H9 | cDNA FLJ78503, highly similar to Homo sapiens keratin 13 (KRT13), transcript variant 1, mRNA OS=Homo sapiens PE=2 SV=1       | 56.24 | 1 | 117 |  | 8.7  |
|    | A1A4E9 | Keratin 13 OS=Homo sapiens GN=KRT13 PE=2 SV=1                                                                                | 56.24 | 1 | 117 |  | 8.7  |
| 52 | Q8N1A0 | Keratin-like protein KRT222 OS=Homo sapiens GN=KRT222 PE=2 SV=1                                                              | 56.24 | 1 | 115 |  | 11.1 |
| 53 | Q6IBN1 | HNRPK protein OS=Homo sapiens GN=HNRPK PE=2 SV=1                                                                             | 56.21 | 1 | 71  |  | 4.9  |
|    | Q5T6W5 | Heterogeneous nuclear ribonucleoprotein K OS=Homo sapiens GN=HNRNPK PE=2 SV=1                                                | 56.21 | 1 | 71  |  | 4.9  |
|    | Q5EC54 | Heterogeneous nuclear ribonucleoprotein K transcript variant OS=Homo sapiens GN=HNRPK PE=2 SV=1                              | 56.21 | 1 | 71  |  | 4.9  |
|    | P61978 | Heterogeneous nuclear ribonucleoprotein K OS=Homo sapiens GN=HNRNPK PE=1 SV=1                                                | 56.21 | 1 | 71  |  | 4.9  |
|    | B4DUQ1 | cDNA FLJ54552, highly similar to Heterogeneous nuclear ribonucleoprotein K OS=Homo sapiens PE=2 SV=1                         | 56.21 | 1 | 71  |  | 4.9  |
|    | B4DFF1 | cDNA FLJ53312, highly similar to Heterogeneous nuclear ribonucleoprotein K OS=Homo sapiens PE=2 SV=1                         | 56.21 | 1 | 71  |  | 4.9  |
|    | B3KU16 | cDNA FLJ39066 fis, clone NT2RP7014743, highly similar to HETEROGENEOUS NUCLEAR RIBONUCLEOPROTEIN K OS=Homo sapiens PE=2 SV=1 | 56.21 | 1 | 71  |  | 4.9  |
| 54 | P62258 | 14-3-3 protein epsilon OS=Homo sapiens GN=YWHAE PE=1 SV=1                                                                    | 55.68 | 1 | 65  |  | 16.7 |
|    | G9K389 | YWHAE/FAM22B fusion protein (Fragment) OS=Homo sapiens GN=YWHAE/FAM22B fusion PE=2 SV=1                                      | 55.68 | 1 | 65  |  | 16.7 |
|    | G9K388 | YWHAE/FAM22A fusion protein (Fragment) OS=Homo sapiens GN=YWHAE/FAM22A fusion PE=2 SV=1                                      | 55.68 | 1 | 65  |  | 16.7 |
|    | B7ZA86 | cDNA, FLJ79100, highly similar to 14-3-3 protein epsilon (14-3-3E) OS=Homo sapiens PE=2 SV=1                                 | 55.68 | 1 | 65  |  | 16.7 |
| 55 | P10809 | 60 kDa heat shock protein, mitochondrial OS=Homo sapiens GN=HSPD1 PE=1 SV=2                                                  | 55.61 | 1 | 134 |  | 9.0  |
|    | B7Z5E7 | cDNA FLJ51046, highly similar to 60 kDa heat shock protein, mitochondrial OS=Homo sapiens PE=2 SV=1                          | 55.61 | 1 | 134 |  | 9.0  |
|    | B7Z597 | cDNA FLJ54373, highly similar to 60 kDa heat shock protein, mitochondrial OS=Homo sapiens PE=2 SV=1                          | 55.61 | 1 | 134 |  | 9.0  |
|    | B7Z4F6 | cDNA FLJ54912, highly similar to 60 kDa heat shock protein, mitochondrial OS=Homo sapiens PE=2 SV=1                          | 55.61 | 1 | 134 |  | 9.0  |
|    | B3GQS7 | Mitochondrial heat shock 60kD protein 1 variant 1 OS=Homo sapiens GN=HSPD1 PE=2 SV=1                                         | 55.61 | 1 | 134 |  | 9.0  |
| 56 | P81605 | Dermodin OS=Homo sapiens GN=DCD PE=1 SV=2                                                                                    | 54.27 | 1 | 105 |  | 20.0 |
| 57 | J3KN62 | Cadherin-13 OS=Homo sapiens GN=CDH13 PE=4 SV=1                                                                               | 53.12 | 1 | 43  |  | 43.3 |
|    | B7Z9B1 | cDNA FLJ52398, highly similar to Cadherin-13 OS=Homo sapiens PE=2 SV=1                                                       | 53.12 | 1 | 43  |  | 43.3 |
| 58 | Q13162 | Peroxiredoxin-4 OS=Homo sapiens GN=PRDX4 PE=1 SV=1                                                                           | 52.94 | 1 | 24  |  | 18.0 |
|    | H7C3T4 | Peroxiredoxin-4 (Fragment) OS=Homo sapiens GN=PRDX4 PE=4 SV=1                                                                | 52.94 | 1 | 24  |  | 18.0 |
| 59 | Q9NX34 | cDNA FLJ20465 fis, clone KAT06236 OS=Homo sapiens PE=2 SV=1                                                                  | 52.37 | 1 | 4   |  | 3.3  |
|    | Q9BT19 | NPM1 protein (Fragment) OS=Homo sapiens GN=NPM1 PE=2 SV=2                                                                    | 52.37 | 1 | 4   |  | 3.3  |
|    | P06748 | Nucleophosmin OS=Homo sapiens GN=NPM1 PE=1 SV=2                                                                              | 52.37 | 1 | 4   |  | 3.3  |
|    | A4ZU86 | Truncated nucleolar phosphoprotein B23 OS=Homo sapiens GN=NPM1 PE=2 SV=1                                                     | 52.37 | 1 | 4   |  | 3.3  |
| 60 | Q1JUQ4 | FK506 binding protein12 OS=Homo sapiens GN=FKBP12-Exp3 PE=4 SV=1                                                             | 52.08 | 1 | 8   |  | 35.1 |



|    |        |                                                                                                                                                 |       |   |     |  |      |
|----|--------|-------------------------------------------------------------------------------------------------------------------------------------------------|-------|---|-----|--|------|
|    | Q1JUQ3 | FK506 binding protein12 OS=Homo sapiens GN=FKBP12-Exin PE=4 SV=1                                                                                | 52.08 | 1 | 8   |  | 35.1 |
|    | P62942 | Peptidyl-prolyl cis-trans isomerase FKBP1A OS=Homo sapiens GN=FKBP1A PE=1 SV=2                                                                  | 52.08 | 1 | 8   |  | 35.1 |
| 61 | P13521 | Secretogranin-2 OS=Homo sapiens GN=SCG2 PE=1 SV=2                                                                                               | 51.56 | 1 | 82  |  | 7.1  |
|    | B4DQJ6 | cDNA FLJ51276, highly similar to Secretogranin-2 OS=Homo sapiens PE=2 SV=1                                                                      | 51.56 | 1 | 82  |  | 7.1  |
| 62 | Q96K68 | cDNA FLJ14473 fis, clone MAMMA1001080, highly similar to Homo sapiens SNC73 protein (SNC73) mRNA OS=Homo sapiens PE=2 SV=1                      | 51.20 | 1 | 27  |  | 24.5 |
|    | Q6ZW64 | cDNA FLJ41552 fis, clone COLON2004478, highly similar to Protein Tro alpha1 H,myeloma OS=Homo sapiens PE=1 SV=1                                 | 51.20 | 1 | 27  |  | 24.5 |
|    | Q6N092 | Putative uncharacterized protein DKFZp686K18196 (Fragment) OS=Homo sapiens GN=DKFZp686K18196 PE=1 SV=1                                          | 51.20 | 1 | 27  |  | 24.5 |
| 63 | Q9UEW6 | Vasopressin-neurophysin (Fragment) OS=Homo sapiens PE=2 SV=1                                                                                    | 50.42 | 1 | 14  |  | 20.5 |
|    | P01185 | Vasopressin-neurophysin 2-copeptin OS=Homo sapiens GN=AVP PE=1 SV=2                                                                             | 50.42 | 1 | 14  |  | 20.5 |
| 64 | P67936 | Tropomyosin alpha-4 chain OS=Homo sapiens GN=TPM4 PE=1 SV=3                                                                                     | 50.37 | 1 | 123 |  | 21.0 |
|    | B4DVY2 | cDNA FLJ54184, highly similar to Tropomyosin alpha-4 chain OS=Homo sapiens PE=2 SV=1                                                            | 50.37 | 1 | 123 |  | 21.0 |
| 65 | P02748 | Complement component C9 OS=Homo sapiens GN=C9 PE=1 SV=2                                                                                         | 49.79 | 1 | 145 |  | 1.6  |
| 66 | Q9HCJ6 | Synaptic vesicle membrane protein VAT-1 homolog-like OS=Homo sapiens GN=VAT1L PE=1 SV=2                                                         | 49.59 | 1 | 20  |  | 2.1  |
|    | Q8NDE0 | Putative uncharacterized protein DKFZp547P162 (Fragment) OS=Homo sapiens GN=DKFZp547P162 PE=2 SV=1                                              | 49.59 | 1 | 20  |  | 2.1  |
|    | A8K288 | cDNA FLJ76322 OS=Homo sapiens PE=2 SV=1                                                                                                         | 49.59 | 1 | 20  |  | 2.1  |
| 67 | P69905 | Hemoglobin subunit alpha OS=Homo sapiens GN=HBA1 PE=1 SV=2                                                                                      | 48.51 | 1 | 106 |  | 34.5 |
|    | I1VZV6 | Hemoglobin alpha 1 OS=Homo sapiens GN=HBA1 PE=3 SV=1                                                                                            | 48.51 | 1 | 106 |  | 34.5 |
|    | E9M4D4 | Hemoglobin alpha-1 globin chain (Fragment) OS=Homo sapiens GN=HBA1 PE=3 SV=1                                                                    | 48.51 | 1 | 106 |  | 34.5 |
|    | D1MGQ2 | Alpha-2 globin chain OS=Homo sapiens GN=HBA2 PE=2 SV=1                                                                                          | 48.51 | 1 | 106 |  | 34.5 |
| 68 | P16615 | Sarcoplasmic/endoplasmic reticulum calcium ATPase 2 OS=Homo sapiens GN=ATP2A2 PE=1 SV=1                                                         | 48.13 | 1 | 96  |  | 4.1  |
|    | H7C5W9 | Sarcoplasmic/endoplasmic reticulum calcium ATPase 2 (Fragment) OS=Homo sapiens GN=ATP2A2 PE=3 SV=1                                              | 48.13 | 1 | 96  |  | 4.1  |
| 69 | P68036 | Ubiquitin-conjugating enzyme E2 L3 OS=Homo sapiens GN=UBE2L3 PE=1 SV=1                                                                          | 47.93 | 1 | 10  |  | 4.2  |
|    | E7EWS7 | Ubiquitin-conjugating enzyme E2 L3 OS=Homo sapiens GN=UBE2L3 PE=2 SV=1                                                                          | 47.93 | 1 | 10  |  | 4.2  |
|    | B4DSZ4 | cDNA FLJ59750, highly similar to Ubiquitin-conjugating enzyme E2 L3 (EC 6.3.2.19) OS=Homo sapiens PE=2 SV=1                                     | 47.93 | 1 | 10  |  | 4.2  |
|    | A8K4W8 | cDNA FLJ77917, highly similar to Homo sapiens ubiquitin-conjugating enzyme E2L 3 (UBE2L3), transcript variant 1, mRNA OS=Homo sapiens PE=2 SV=1 | 47.93 | 1 | 10  |  | 4.2  |
| 70 | Q06830 | Peroxiredoxin-1 OS=Homo sapiens GN=PRDX1 PE=1 SV=1                                                                                              | 47.38 | 1 | 99  |  | 23.6 |
|    | B2R4P2 | cDNA, FLJ92164, highly similar to Homo sapiens peroxiredoxin 1 (PRDX1), mRNA OS=Homo sapiens PE=2 SV=1                                          | 47.38 | 1 | 99  |  | 23.6 |
| 71 | Q53SS8 | Poly(RC) binding protein 1 OS=Homo sapiens GN=PCBP1 PE=2 SV=1                                                                                   | 47.17 | 1 | 53  |  | 3.1  |
|    | Q15365 | Poly(rC)-binding protein 1 OS=Homo sapiens GN=PCBP1 PE=1 SV=2                                                                                   | 47.17 | 1 | 53  |  | 3.1  |

Group Nr.

By the rule of parsimony, we have gathered all proteins sharing the same identified peptides into a single group.

Accession Nr.

The accession number from the searched database (DB).

### Protein Name

The protein name in the DB.

### Protein Score

Sum of the contributing peptide scores.

NOTE: This score can only be used to support the identification of **one** protein per group.

### Unique PSMs

The number of unique peptide-spectrum matches that contribute to the protein assignment.

### PSM Serial Nrs.

Sequential number of assigned peptide (in the following table.)

### Other Grp.

If the protein is assigned to another group, that (those) group number(s).

### % Seq. Cover.

Percent sequence coverage of this protein.

## Assigned Peptides

| #  | Sequence                     | PTM Site                    | Nr. Scans | Mascot Score | Expectation | Isolated Mass | Delta Mass | Charge State | Matched Ions | Scan Nr. |
|----|------------------------------|-----------------------------|-----------|--------------|-------------|---------------|------------|--------------|--------------|----------|
| 1  | K.NVQDAIADAEQR.G             |                             | 1         | 55.380       | 0.00031     | 665.32        | 0.9        | 2            | '9/22        | 3188     |
| 2  | R.DAETWFLSK.T                |                             | 1         | 47.970       | 0.0016      | 548.77        | 0.4        | 2            | '5/16        | 4962     |
| 3  | K.LNDLEDALQQAQK.E            |                             | 1         | 70.190       | 1.6e-005    | 679.35        | -1.6       | 2            | '9/22        | 4076     |
| 4  | K.GPSSVEDIK.A                |                             | 4         | 52.370       | 0.00088     | 466.24        | 0.6        | 2            | '7/16        | 1588     |
| 5  | K.SLNNQFASFIDK.V             |                             | 1         | 65.290       | 3.7e-005    | 692.35        | 0.2        | 2            | '7/22        | 4836     |
| 6  | R.ISISTSGGSFR.N              |                             | 1         | 52.360       | 0.0007      | 556.29        | 4.6        | 2            | '10/20       | 2984     |
| 7  | R.GSSSSGGYSSGSSSYGSGGR.Q     |                             | 1         | 133.370      | 3e-013      | 870.86        | -1.2       | 2            | '13/38       | 1191     |
| 8  | M.GVQVETISPGDGR.T            |                             | 1         | 52.080       | 0.00078     | 657.84        | 0.9        | 2            | '8/24        | 2462     |
| 9  | R.IEEELGDEAR.F               |                             | 1         | 50.770       | 0.00055     | 580.77        | -0.6       | 2            | '13/18       | 1960     |
| 10 | R.ADLAEEYSK.D                |                             | 1         | 47.930       | 0.0012      | 513.24        | -0.8       | 2            | '8/16        | 1978     |
| 11 | R.ALASQLQDSLK.D              |                             | 1         | 61.450       | 0.00022     | 587.33        | 1.9        | 2            | '8/20        | 3490     |
| 12 | K.TIDDLEETLASAK.E            |                             | 1         | 94.540       | 4.9e-008    | 703.36        | -1.6       | 2            | '11/24       | 4690     |
| 13 | R.AQYEEIAQR.S                |                             | 1         | 58.150       | 0.0002      | 554.27        | -1.5       | 2            | '6/16        | 1884     |
| 14 | R.AMSDLELR.-                 | 0.01000000.0                | 1         | 50.420       | 0.0013      | 475.73        | -1.2       | 2            | '7/14        | 2137     |
| 15 | R.ELEEISERLEEAGGATSVQIEMNK.K | 0.00000000000000000000100.0 | 5         | 88.180       | 1.6e-007    | 893.43        | 0.4        | 3            | '21/46       | 4943     |
| 16 | R.SEVELVQIVIDGVNYLVDCEK.K    |                             | 1         | 48.570       | 0.0026      | 807.74        | -1.7       | 3            | '17/40       | 7233     |
| 17 | K.ESTLHLVLR.L                |                             | 4         | 48.530       | 0.0011      | 534.31        | -2.6       | 2            | '7/16        | 3979     |



|    |                              |                             |    |        |          |         |       |   |        |      |
|----|------------------------------|-----------------------------|----|--------|----------|---------|-------|---|--------|------|
| 18 | K.NQLTSNPENTVFDK.R           |                             | 1  | 87.050 | 3.8e-007 | 839.41  | -1.0  | 2 | '9/28  | 3425 |
| 19 | K.VEIANDQG.NR.T              |                             | 2  | 63.200 | 6.3e-005 | 614.82  | -0.2  | 2 | '8/20  | 2002 |
| 20 | R.NADYVQEVK.R                |                             | 1  | 49.590 | 0.0015   | 533.26  | -1.4  | 2 | '13/16 | 1944 |
| 21 | K.VDNALQSGNSQESVTEQDSK.D     |                             | 2  | 74.670 | 2.2e-006 | 1068.49 | -0.3  | 2 | '14/38 | 1874 |
| 22 | K.AVTEQGAELSNEER.N           |                             | 1  | 68.620 | 1.4e-005 | 766.86  | 0.8   | 2 | '10/26 | 1830 |
| 23 | K.SVIPSDGPSVACVK.K           |                             | 2  | 61.870 | 7.7e-005 | 708.36  | 0.4   | 2 | '7/26  | 3111 |
| 24 | R.QITLNDLPVGR.S              |                             | 1  | 52.940 | 0.00043  | 613.35  | 0.7   | 2 | '8/20  | 4113 |
| 25 | R.QVLDNLTMEK.S               | 0.0000000100.0              | 1  | 49.760 | 0.0017   | 603.81  | 3.1   | 2 | '8/18  | 2969 |
| 26 | K.SKAEAESLYQSK.Y             |                             | 2  | 67.560 | 4.2e-005 | 670.84  | -0.1  | 2 | '10/22 | 2083 |
| 27 | R.WLQGSQELPR.E               |                             | 2  | 51.200 | 0.0009   | 607.32  | -0.9  | 2 | '9/18  | 3445 |
| 28 | K.DAEWFFTK.T                 |                             | 1  | 50.060 | 0.0012   | 586.77  | -2.0  | 2 | '6/16  | 5233 |
| 29 | K.VAQDQGSVVQFK.I             |                             | 1  | 63.890 | 7.5e-005 | 617.82  | -0.9  | 2 | '10/22 | 2759 |
| 30 | K.STVEGIQASVK.T              |                             | 1  | 57.820 | 0.00029  | 559.81  | 0.6   | 2 | '8/20  | 2215 |
| 31 | R.VYSTSVTGSR.E               |                             | 1  | 61.510 | 7.3e-005 | 528.77  | 0.2   | 2 | '7/18  | 1378 |
| 32 | R.QGVDADINGLR.Q              |                             | 1  | 52.690 | 0.00063  | 579.30  | -1.6  | 2 | '8/20  | 2979 |
| 33 | K.SASDLTWDNLK.G              |                             | 10 | 67.900 | 2.3e-005 | 625.31  | -1.0  | 2 | '7/20  | 3607 |
| 34 | K.LCYVALDFENEMATAASSSSLEK.S  | 0.00000000000100000000000.0 | 7  | 86.360 | 1.6e-007 | 851.39  | 2.3   | 3 | '25/44 | 4998 |
| 35 | R.SQYEQLAEQNR.K              |                             | 2  | 78.810 | 1.3e-006 | 683.32  | 0.7   | 2 | '8/20  | 2049 |
| 36 | K.AGFAGDDAPR.A               |                             | 3  | 74.790 | 2.1e-006 | 488.73  | -0.4  | 2 | '9/18  | 1732 |
| 37 | K.SEETLDEGPPK.Y              |                             | 1  | 59.790 | 8.3e-005 | 601.28  | 3.6   | 2 | '7/20  | 1640 |
| 38 | R.KPVEEYANCHLAR.A            |                             | 2  | 57.420 | 0.00024  | 529.60  | 1.1   | 3 | '11/24 | 3133 |
| 39 | K.AQYEEIANR.S                |                             | 1  | 57.800 | 0.00025  | 547.27  | 0.5   | 2 | '6/16  | 1845 |
| 40 | K.IQVLQQQADDAEER.A           |                             | 1  | 82.010 | 8.6e-007 | 821.90  | -1.8  | 2 | '11/26 | 2721 |
| 41 | K.DSGFQMNQLR.G               | 0.0000010000.0              | 2  | 56.650 | 9.9e-005 | 606.28  | -0.3  | 2 | '9/18  | 2135 |
| 42 | K.MYLGYEYVTAIR.N             | 0.100000000000.0            | 1  | 79.300 | 1.7e-006 | 747.87  | 1.9   | 2 | '10/22 | 4794 |
| 43 | R.INENTGSVSVTR.T             |                             | 1  | 53.120 | 0.00066  | 638.82  | -17.2 | 2 | '10/22 | 1641 |
| 44 | K.YEELQITAGR.H               |                             | 2  | 63.400 | 7.3e-005 | 590.31  | 4.8   | 2 | '8/18  | 3032 |
| 45 | K.IQDKEGIPDQQR.L             |                             | 14 | 56.020 | 0.00041  | 762.40  | 4.5   | 2 | '10/24 | 1787 |
| 46 | K.TVGMVAGDEESYEVFADLFDPIVK.L | 0.00010000000000000000000.0 | 2  | 54.980 | 0.00035  | 883.09  | 1.2   | 3 | '24/46 | 6396 |
| 47 | K.KSASDLTWDNLK.G             |                             | 4  | 78.740 | 2.3e-006 | 689.35  | -0.4  | 2 | '8/22  | 3562 |
| 48 | R.SLLEGE GSSGGGR.G           |                             | 1  | 59.310 | 0.00011  | 631.80  | -0.3  | 2 | '17/26 | 2184 |
| 49 | R.QSVEADINGLR.R              |                             | 2  | 58.210 | 0.00022  | 601.31  | -0.4  | 2 | '10/20 | 3293 |
| 50 | K.KVPQVSTPTLVEVSR.N          |                             | 10 | 80.430 | 5.7e-007 | 820.47  | -0.4  | 2 | '9/28  | 3720 |
| 51 | K.KYDEELEER.L                |                             | 2  | 65.320 | 2.2e-005 | 605.78  | -0.7  | 2 | '8/16  | 2006 |
| 52 | R.TNQLQEINR.V                |                             | 1  | 62.340 | 8.4e-005 | 622.82  | -0.2  | 2 | '7/18  | 2004 |
| 53 | K.IANPVEGSSGR.Q              |                             | 1  | 47.170 | 0.0025   | 543.78  | 0.6   | 2 | '7/20  | 1719 |
| 54 | K.SLQDIAILGMDLSEEDKLTVSR.A   | 0.00000000001000000000000.0 | 1  | 57.820 | 0.00022  | 897.80  | 2.8   | 3 | '20/46 | 6410 |
| 55 | K.AQYEEIAQR.S                |                             | 3  | 58.150 | 0.0002   | 554.27  | -1.5  | 2 | '6/16  | 1884 |
| 56 | K.ILLAELEQLK.G               |                             | 1  | 50.880 | 0.00038  | 585.36  | -0.3  | 2 | '9/18  | 5416 |
| 57 | K.GGYTLVSGYPK.R              |                             | 2  | 61.470 | 8.6e-005 | 571.30  | -1.5  | 2 | '8/20  | 3374 |
| 58 | K.GILAADESTGSIK.R            |                             | 1  | 57.440 | 0.00035  | 666.85  | -1.6  | 2 | '16/26 | 3060 |
| 59 | R.SLQEQADAAEER.A             |                             | 1  | 58.080 | 0.0001   | 673.81  | 1.2   | 2 | '9/22  | 1829 |
| 60 | R.EFTESQLQEGK.H              |                             | 1  | 62.530 | 5.3e-005 | 648.31  | 0.7   | 2 | '8/20  | 2292 |

|     |                                |                            |    |         |          |         |      |   |        |      |
|-----|--------------------------------|----------------------------|----|---------|----------|---------|------|---|--------|------|
| 61  | R.TNAENEFVTIK.K                |                            | 2  | 52.890  | 0.00079  | 633.32  | 1.3  | 2 | '8/20  | 3184 |
| 62  | R.HVGDLDGNVTADK.D              |                            | 1  | 90.130  | 1.1e-007 | 613.31  | -3.1 | 2 | '19/22 | 2430 |
| 63  | K.DAGTIAGLNVLR.I               |                            | 2  | 73.130  | 9.3e-006 | 600.34  | -2.3 | 2 | '10/22 | 4709 |
| 64  | R.LQSIGTENTEENR.R              |                            | 1  | 68.640  | 1.4e-005 | 745.86  | 1.0  | 2 | '10/24 | 1734 |
| 65  | K.EAAENSLVAYK.A                |                            | 1  | 55.680  | 0.00039  | 597.80  | 2.0  | 2 | '7/20  | 2539 |
| 66  | K.FADLSEANR.N                  |                            | 1  | 61.930  | 9.7e-005 | 547.27  | 2.2  | 2 | '9/18  | 2661 |
| 67  | K.LCYVALDFENEMATAASSSSLEK.S    |                            | 3  | 83.650  | 3.2e-007 | 1268.58 | 0.2  | 2 | '15/44 | 5827 |
| 68  | R.WCAVSEHEATK.C                |                            | 6  | 50.200  | 0.00044  | 659.30  | -3.8 | 2 | '9/20  | 2153 |
| 69  | R.DYQELMNTK.L                  | 0.000001000.0              | 1  | 50.160  | 0.00044  | 579.26  | 0.5  | 2 | '7/16  | 1765 |
| 70  | R.QDVDNASLAR.L                 |                            | 1  | 70.660  | 1e-005   | 544.77  | -3.3 | 2 | '9/18  | 1423 |
| 71  | K.IDEPLGSEDR.I                 |                            | 1  | 56.210  | 0.00012  | 630.29  | -0.8 | 2 | '14/20 | 2248 |
| 72  | K.ATDAEADVASLNR.G              |                            | 1  | 83.270  | 5.2e-007 | 666.82  | 1.3  | 2 | '9/24  | 2546 |
| 73  | K.QLEEDIAAK.E                  |                            | 2  | 50.580  | 0.0013   | 508.77  | -0.3 | 2 | '7/16  | 1991 |
| 74  | K.HSTIFENLANKADR.D             |                            | 4  | 77.490  | 2.9e-006 | 539.28  | -0.7 | 3 | '11/26 | 4722 |
| 75  | K.ATDAEADVASLNR.R              |                            | 3  | 83.270  | 5.2e-007 | 666.82  | 1.3  | 2 | '9/24  | 2546 |
| 76  | K.IDTIEIITDR.Q                 |                            | 1  | 59.730  | 0.00021  | 594.83  | -1.4 | 2 | '7/18  | 4449 |
| 77  | K.ELEEIVQPIISK.L               |                            | 1  | 49.770  | 0.00092  | 699.40  | 2.2  | 2 | '14/22 | 4644 |
| 78  | R.ALEESNYELEGK.I               |                            | 1  | 87.230  | 3e-007   | 691.33  | -0.3 | 2 | '9/22  | 2608 |
| 79  | R.SGGGGGGGLGSGGSIR.S           |                            | 1  | 114.910 | 3.8e-010 | 616.80  | -1.0 | 2 | '15/30 | 1982 |
| 80  | K.CDEWSVNSVGK.I                |                            | 1  | 72.970  | 1.6e-006 | 640.78  | -4.1 | 2 | '9/20  | 2933 |
| 81  | K.SVTEQGAELSNEER.N             |                            | 1  | 104.310 | 3e-009   | 774.86  | 0.3  | 2 | '10/26 | 1942 |
| 82  | K.VLEYLNQEK.A                  |                            | 1  | 51.560  | 0.003    | 568.30  | -0.2 | 2 | '6/16  | 3048 |
| 83  | K.LYTLVLTDPDAPSR.K             |                            | 1  | 79.860  | 1.7e-006 | 780.92  | 0.1  | 2 | '11/26 | 4756 |
| 84  | K.QVATALQNLQTK.T               |                            | 1  | 80.630  | 1.5e-006 | 657.87  | 0.0  | 2 | '10/22 | 3030 |
| 85  | K.QISNLQSSISDAEQR.G            |                            | 2  | 100.000 | 1.4e-008 | 858.93  | -0.5 | 2 | '12/28 | 3557 |
| 86  | K.ASLENSLEETK.G                |                            | 2  | 59.330  | 0.0002   | 610.80  | -0.2 | 2 | '8/20  | 2612 |
| 87  | R.TLSDYNIQK.E                  |                            | 2  | 49.300  | 0.0016   | 541.28  | -0.1 | 2 | '12/16 | 2305 |
| 88  | K.AEADVASLNR.R                 |                            | 2  | 72.910  | 7.9e-006 | 523.27  | -0.2 | 2 | '9/18  | 1811 |
| 89  | R.ALEEANADLEVK.I               |                            | 4  | 63.010  | 7.4e-005 | 651.33  | 0.2  | 2 | '9/22  | 2798 |
| 90  | R.VEIIANDQGNR.I                |                            | 1  | 63.200  | 6.3e-005 | 614.82  | -0.2 | 2 | '8/20  | 2002 |
| 91  | K.AINQGGLTSAVAVR.G             |                            | 1  | 62.760  | 6.4e-005 | 643.37  | 4.7  | 2 | '9/24  | 3024 |
| 92  | R.KLVIIESDLER.A                |                            | 4  | 67.100  | 2.6e-005 | 657.88  | -1.7 | 2 | '7/20  | 4438 |
| 93  | K.EVASNSELVQSSR.S              |                            | 1  | 69.300  | 1.7e-005 | 703.35  | 3.9  | 2 | '9/24  | 1814 |
| 94  | K.AADAEAEVASLNR.R              |                            | 1  | 64.230  | 4.5e-005 | 658.83  | 2.0  | 2 | '8/24  | 2418 |
| 95  | K.QSLEASLAETEGR.Y              |                            | 1  | 101.350 | 1.2e-008 | 695.84  | 0.4  | 2 | '10/24 | 3394 |
| 96  | K.TASEMVLADDNFSTIVAAVEEGR.A    | 0.0000100000000000000000.0 | 2  | 48.130  | 0.0019   | 814.39  | 0.1  | 3 | '15/44 | 5963 |
| 97  | K.HSTIFENLANK.A                |                            | 12 | 77.010  | 3.7e-006 | 637.33  | 1.3  | 2 | '9/20  | 4410 |
| 98  | R.GSGSGSYGGGSGGGYGGGSGS<br>R.G |                            | 2  | 133.450 | 4.2e-013 | 896.37  | -0.1 | 2 | '15/44 | 1496 |
| 99  | R.LVQAFQFTDK.H                 |                            | 1  | 47.380  | 0.0024   | 598.82  | -1.2 | 2 | '8/18  | 4096 |
| 100 | K.VPQVSTPTLVEVSR.N             |                            | 1  | 71.020  | 7.4e-006 | 756.42  | 0.0  | 2 | '11/26 | 3876 |
| 101 | K.DSYVGDEAQS.K                 |                            | 2  | 54.570  | 0.00016  | 599.76  | -0.3 | 2 | '14/20 | 1278 |
| 102 | K.DGAGDVAFVK.H                 |                            | 12 | 71.570  | 1.1e-005 | 489.75  | 0.2  | 2 | '9/18  | 3019 |

|     |                            |                |   |         |          |        |      |   |        |      |
|-----|----------------------------|----------------|---|---------|----------|--------|------|---|--------|------|
| 103 | R.TAAENDFVTLK.K            |                | 1 | 60.530  | 0.00016  | 604.81 | -0.1 | 2 | '9/20  | 3310 |
| 104 | R.FSSSSGYGGGSSR.V          |                | 1 | 78.730  | 3.2e-007 | 618.27 | 0.0  | 2 | '11/24 | 1287 |
| 105 | K.DAVEDLESVGK.G            |                | 1 | 54.270  | 0.00042  | 581.28 | -2.2 | 2 | '14/20 | 3836 |
| 106 | K.VGAHAGEYGAEALER.M        |                | 2 | 48.510  | 0.0014   | 510.58 | -0.5 | 3 | '8/28  | 3684 |
| 107 | K.NMQDMVEDYR.N             | 0.0100100000.0 | 1 | 50.020  | 7.9e-005 | 666.76 | -0.3 | 2 | '6/18  | 1782 |
| 108 | K.YENEVALR.Q               |                | 1 | 48.940  | 0.0021   | 497.25 | -0.5 | 2 | '7/14  | 2124 |
| 109 | K.VQALEEANNLENK.I          |                | 1 | 102.440 | 6.8e-009 | 793.89 | -0.8 | 2 | '10/26 | 2816 |
| 110 | R.LENEIQTYR.S              |                | 1 | 52.690  | 0.0013   | 583.30 | 1.2  | 2 | '11/16 | 2363 |
| 111 | K.EFQLFSSPHGK.D            |                | 6 | 52.820  | 0.00084  | 638.82 | 0.3  | 2 | '8/20  | 4217 |
| 112 | K.YEELQQTAGR.H             |                | 1 | 62.490  | 6.4e-005 | 597.79 | 0.2  | 2 | '8/18  | 1678 |
| 113 | R.FLEQQNQVLQTK.W           |                | 2 | 71.100  | 1.5e-005 | 738.40 | 5.6  | 2 | '8/22  | 3134 |
| 114 | R.TTPSYVAFTDTER.L          |                | 3 | 62.290  | 5.6e-005 | 744.35 | 0.7  | 2 | '10/24 | 3511 |
| 115 | R.LEQEIATYR.H              |                | 1 | 56.240  | 0.00046  | 561.79 | -0.4 | 2 | '6/16  | 2455 |
| 116 | R.LEQEIATYR.R              |                | 3 | 56.240  | 0.00046  | 561.79 | -0.4 | 2 | '6/16  | 2455 |
| 117 | R.LEQEIATYR.S              |                | 1 | 56.240  | 0.00046  | 561.79 | -0.4 | 2 | '6/16  | 2455 |
| 118 | R.EQAEAEVASLNR.R           |                | 1 | 66.160  | 2.9e-005 | 658.83 | 2.0  | 2 | '8/22  | 2418 |
| 119 | K.VLQATVAVGSGSK.G          |                | 1 | 92.980  | 5.2e-008 | 658.38 | -0.1 | 2 | '20/26 | 2945 |
| 120 | R.TLLEGEESR.M              |                | 1 | 50.840  | 0.0013   | 517.26 | 0.2  | 2 | '6/16  | 2145 |
| 121 | R.LSQETEALGR.S             |                | 1 | 58.840  | 0.00023  | 552.29 | 0.2  | 2 | '7/18  | 1806 |
| 122 | R.QAASSLQQASLK.L           |                | 1 | 65.840  | 4.6e-005 | 616.34 | -0.6 | 2 | '9/22  | 1946 |
| 123 | R.KLVILEGELER.A            |                | 2 | 50.370  | 0.00072  | 649.89 | -0.8 | 2 | '6/20  | 4860 |
| 124 | R.SNAQGIDLNR.N             |                | 1 | 65.490  | 3.7e-005 | 544.28 | -0.6 | 2 | '8/18  | 1906 |
| 125 | R.IQLVEEELDR.A             |                | 9 | 69.010  | 1.9e-005 | 622.33 | 3.0  | 2 | '8/18  | 3884 |
| 126 | K.AEAESLYQSK.Y             |                | 1 | 57.690  | 0.00016  | 563.27 | -0.2 | 2 | '8/18  | 1696 |
| 127 | R.KLVILEGELER.S            |                | 6 | 50.370  | 0.00072  | 649.89 | -0.8 | 2 | '6/20  | 4860 |
| 128 | R.QFVTATDVVR.G             |                | 1 | 63.710  | 0.00017  | 568.31 | -0.3 | 2 | '9/18  | 3207 |
| 129 | K.CAELEELK.T               |                | 3 | 56.200  | 0.00022  | 560.76 | -0.4 | 2 | '6/16  | 2767 |
| 130 | R.ITESEEVSR.E              |                | 1 | 76.530  | 3.6e-006 | 574.79 | 0.3  | 2 | '8/18  | 1646 |
| 131 | K.QLEEEQALQK.K             |                | 3 | 84.180  | 5.2e-007 | 672.34 | 0.3  | 2 | '9/20  | 1926 |
| 132 | R.APNHAVVTR.K              |                | 4 | 54.370  | 0.00042  | 482.77 | 1.5  | 2 | '7/16  | 1457 |
| 133 | R.SGETEDTFIADLVVGLCTGQIK.T |                | 2 | 47.430  | 0.0026   | 785.06 | -1.6 | 3 | '7/42  | 6553 |
| 134 | K.VGGTSDVEVNEK.K           |                | 1 | 55.610  | 0.00032  | 617.30 | -1.9 | 2 | '7/22  | 1346 |
| 135 | K.AAFDIFVLGAEDGCISTK.E     |                | 1 | 64.570  | 4.4e-005 | 957.47 | 0.0  | 2 | '14/34 | 5873 |
| 136 | K.EGYGYTGAFR.C             |                | 5 | 55.140  | 0.00014  | 642.29 | -2.2 | 2 | '8/20  | 3928 |
| 137 | R.VEILANDQGNR.T            |                | 1 | 63.200  | 6.3e-005 | 614.82 | -0.2 | 2 | '8/20  | 2002 |
| 138 | K.SKEFQLFSSPHGK.D          |                | 8 | 75.740  | 5.8e-006 | 746.38 | -0.5 | 2 | '8/24  | 4232 |
| 139 | K.TITLEVEPSDTIENVK.A       |                | 2 | 58.650  | 0.00022  | 894.46 | -2.7 | 2 | '16/30 | 4330 |
| 140 | R.VLDELTLAR.A              |                | 2 | 57.860  | 0.00029  | 515.30 | -2.0 | 2 | '6/16  | 3999 |
| 141 | K.ADAEGESDLENSR.K          |                | 1 | 73.830  | 8e-007   | 696.79 | -5.0 | 2 | '10/24 | 1437 |
| 142 | K.EDPQTFYYAVVVK.K          |                | 4 | 70.110  | 5.1e-005 | 815.41 | 1.1  | 2 | '11/26 | 5076 |
| 143 | R.EVATNSELVQSGK.S          |                | 2 | 86.630  | 3.7e-007 | 681.35 | 1.2  | 2 | '9/24  | 1791 |
| 144 | R.VLDELTLAR.T              |                | 2 | 57.860  | 0.00029  | 515.30 | -2.0 | 2 | '6/16  | 3999 |
| 145 | R.VVEEELAR.T               |                | 1 | 49.790  | 0.0019   | 516.27 | 2.9  | 2 | '8/16  | 1772 |

#

Serial (sequential) number for peptide.

*Sequence*

Assigned peptide sequence. Periods (".") delimit the sequence for internal peptides.

*PTM Site*

Location of the post-translational modification (PTM) in the peptide.

Modification codes: [1] Oxidation (M)

*Nr. Scans*

The number of MS/MS scans that were matched to this peptide.

*Mascot Score*

Score given to this peptide/spectrum match by Mascot.

*Expectation*

The number of matches with equal or better scores that are expected to occur by chance alone.

*Isolated Mass*

"Mass" in the Orbitrap analyzer.

*Delta Mass*

Difference between the observed and theoretical masses, in ppm.

*Charge State*

Inferred ionic state of the peptide.

*Matched Ions*

Number of matched MS/MS ions, as reported by Mascot.

*Scan Nr.*

MS/MS scan number in the original Xcalibur RAW file.
