# Supplementary material
Source: PubMed Central journal article supplement (PMC4349970)
Supplement: supp_M114.039909_mcp.M114.039909-3.pdf [file supp_M114.039909_mcp.M114.039909-3.pdf]

# RI NSF/EPSCoR Proteomics Facility

## Mass Spectrometry Report

### Protein Groups and Peptide-Spectrum Matches (PSMs)

Sample: Sample 1186 10  
Researcher: Djuro Josic  
Data collected: 24 Aug 2011  
Results filtering: Unique PSMs; MOWSE Score > 19.4; 10 Proteins/  
Group max

MS data file: Sample\_1186\_10\_082611\_022855.raw  
Instrument type: ESI-FTICR  
Search engine: Mascot  
Parameter file: N/D  
Search database: N/D (269577 entries)  
Enzyme specificity: Trypsin (2 missed cleavages allowed)  
MS mass tolerance: 20 ppm; MS/MS tolerance 0.5 Da  
Fixed modifications: Carbamidomethyl (C)  
Var. modifications: [1] Oxidation (M)  
Number of spectra: 4852  
Input PSMs: 1221 'Target'; 18 'Decoy'; 1.5% FDR  
Output PSMs: 1219

| <b>UniProt<br/>Human<br/>Protein<br/>IDs</b> |                                  |                     |                                    |                             |                        |                            |                                   |
|----------------------------------------------|----------------------------------|---------------------|------------------------------------|-----------------------------|------------------------|----------------------------|-----------------------------------|
| <i>Gr<br/>p<br/>Nr.</i>                      | <i>Accessio<br/>n<br/>Number</i> | <i>Protein Name</i> | <i>Prote<br/>in<br/>Scor<br/>e</i> | <i>Uniqu<br/>e<br/>PSMs</i> | <i>PSM Serial Nrs.</i> | <i>Oth<br/>er<br/>Grp.</i> | <i>%<br/>Seq.<br/>Cove<br/>r.</i> |

|   |        |                                                                            |         |    |                                                                                                                                                                                                                                                                                                         |  |      |
|---|--------|----------------------------------------------------------------------------|---------|----|---------------------------------------------------------------------------------------------------------------------------------------------------------------------------------------------------------------------------------------------------------------------------------------------------------|--|------|
| 1 | B4E1B2 | cDNA FLJ53691, highly similar to Serotransferrin OS=Homo sapiens PE=2 SV=1 | 3196.27 | 64 | 3 5 19 23 57 79 97 102<br>105 118 129 136 148<br>183 206 208 209 231<br>236 287 309 330 346<br>351 373 387 391 412<br>450 456 484 515 576<br>634 684 718 732 766<br>782 787 788 791 805<br>813 814 817 833 842<br>898 915 928 1025 1043<br>1090 1096 1121 1125<br>1135 1145 1152 1170<br>1172 1173 1215 |  | 61.7 |
| 2 | Q5I6Y6 | Lamin A/C transcript variant 1 OS=Homo sapiens GN=LMNA PE=2 SV=1           | 1143.14 | 26 | 34 244 275 321 326 350<br>355 367 380 423 445<br>472 566 607 695 716<br>722 843 851 867 930<br>961 967 1035 1062<br>1129                                                                                                                                                                                |  | 41.1 |
|   | Q5I6Y4 | Lamin A/C transcript variant 1 OS=Homo sapiens GN=LMNA PE=2 SV=1           | 1143.14 | 26 | 34 244 275 321 326 350<br>355 367 380 423 445<br>472 566 607 695 716<br>722 843 851 867 930<br>961 967 1035 1062<br>1129                                                                                                                                                                                |  | 41.1 |
|   | P02545 | Prelamin-A/C OS=Homo sapiens GN=LMNA PE=1 SV=1                             | 1143.14 | 26 | 34 244 275 321 326 350<br>355 367 380 423 445<br>472 566 607 695 716<br>722 843 851 867 930<br>961 967 1035 1062<br>1129                                                                                                                                                                                |  | 41.1 |
| 3 | P08727 | Keratin, type I cytoskeletal 19 OS=Homo sapiens GN=KRT19 PE=1 SV=4         | 930.85  | 21 | 2 25 85 194 280 433<br>480 487 631 717 846<br>858 888 946 999 1004<br>1047 1133 1148 1203<br>1211                                                                                                                                                                                                       |  | 50.8 |
| 4 | P05787 | Keratin, type II cytoskeletal 8 OS=Homo sapiens GN=KRT8 PE=1 SV=7          | 930.59  | 22 | 1 71 123 210 296 307<br>382 553 573 641 670<br>683 758 784 808 901<br>909 921 943 970 1207<br>1213                                                                                                                                                                                                      |  | 35.6 |
| 5 | P04075 | Fructose-bisphosphate aldolase A OS=Homo sapiens GN=ALDOA PE=1 SV=2        | 616.74  | 14 | 63 143 173 286 291 422<br>457 465 504 715 981<br>1003 1157 1190                                                                                                                                                                                                                                         |  | 36.7 |
|   | J3KPS3 | Fructose-bisphosphate aldolase OS=Homo sapiens GN=ALDOA PE=3 SV=1          | 616.74  | 14 | 63 143 173 286 291 422<br>457 465 504 715 981<br>1003 1157 1190                                                                                                                                                                                                                                         |  | 36.7 |
| 6 | P60174 | Triosephosphate isomerase OS=Homo sapiens GN=TPI1 PE=1 SV=3                | 610.12  | 11 | 20 35 51 184 300 458<br>463 857 860 889 1042                                                                                                                                                                                                                                                            |  | 45.1 |



|    |        |                                                                                                                            |            |    |                                                              |      |
|----|--------|----------------------------------------------------------------------------------------------------------------------------|------------|----|--------------------------------------------------------------|------|
| 7  | P20700 | Lamin-B1 OS=Homo sapiens GN=LMNB1 PE=1 SV=2                                                                                | 578.9<br>0 | 13 | 39 125 128 205 420 434<br>476 575 724 891 910<br>956 1057    | 27.8 |
| 8  | P11021 | 78 kDa glucose-regulated protein OS=Homo sapiens<br>GN=HSPA5 PE=1 SV=2                                                     | 571.5<br>0 | 12 | 73 139 234 396 477 554<br>568 660 741 774 996<br>1208        | 24.2 |
| 9  | Q5T8M8 | Actin, alpha skeletal muscle OS=Homo sapiens GN=ACTA1<br>PE=4 SV=1                                                         | 540.3<br>9 | 10 | 11 281 313 318 405 481<br>571 777 803 874                    | 35.9 |
|    | P68133 | Actin, alpha skeletal muscle OS=Homo sapiens GN=ACTA1<br>PE=1 SV=1                                                         | 540.3<br>9 | 10 | 11 281 313 318 405 481<br>571 777 803 874                    | 35.9 |
|    | P68032 | Actin, alpha cardiac muscle 1 OS=Homo sapiens GN=ACTC1<br>PE=1 SV=1                                                        | 540.3<br>9 | 10 | 11 281 313 318 405 481<br>571 777 803 874                    | 35.9 |
|    | B7Z6P1 | cDNA FLJ53662, highly similar to Actin, alpha skeletal<br>muscle OS=Homo sapiens PE=2 SV=1                                 | 540.3<br>9 | 10 | 11 281 313 318 405 481<br>571 777 803 874                    | 35.9 |
|    | A6NL76 | Actin, alpha skeletal muscle OS=Homo sapiens GN=ACTA1<br>PE=2 SV=2                                                         | 540.3<br>9 | 10 | 11 281 313 318 405 481<br>571 777 803 874                    | 35.9 |
| 10 | Q4VB24 | Histone cluster 1, H1e OS=Homo sapiens GN=HIST1H1E<br>PE=2 SV=1                                                            | 535.9<br>2 | 10 | 110 196 392 526 656<br>692 770 1011 1063<br>1087             | 36.7 |
|    | P16402 | Histone H1.3 OS=Homo sapiens GN=HIST1H1D PE=1 SV=2                                                                         | 535.9<br>2 | 10 | 110 196 392 526 656<br>692 770 1011 1063<br>1087             | 36.7 |
|    | P10412 | Histone H1.4 OS=Homo sapiens GN=HIST1H1E PE=1 SV=2                                                                         | 535.9<br>2 | 10 | 110 196 392 526 656<br>692 770 1011 1063<br>1087             | 36.7 |
|    | B2R984 | cDNA, FLJ94268, highly similar to Homo sapiens histone 1,<br>H1e (HIST1H1E), mRNA OS=Homo sapiens PE=2 SV=1                | 535.9<br>2 | 10 | 110 196 392 526 656<br>692 770 1011 1063<br>1087             | 36.7 |
|    | A3R0T8 | Histone 1, H1e OS=Homo sapiens GN=HIST1H1E PE=2<br>SV=1                                                                    | 535.9<br>2 | 10 | 110 196 392 526 656<br>692 770 1011 1063<br>1087             | 36.7 |
| 11 | B7Z2X4 | cDNA FLJ53327, highly similar to Gelsolin OS=Homo sapiens<br>PE=2 SV=1                                                     | 529.2<br>8 | 13 | 252 256 269 299 385<br>448 482 667 895 896<br>1024 1112 1166 | 22.0 |
| 12 | P11142 | Heat shock cognate 71 kDa protein OS=Homo sapiens<br>GN=HSPA8 PE=1 SV=1                                                    | 491.1<br>5 | 12 | 16 135 161 260 344 613<br>647 657 759 771 933<br>1144        | 22.9 |
|    | B3KTV0 | cDNA FLJ38781 fis, clone LIVER2000216, highly similar to<br>HEAT SHOCK COGNATE 71 kDa PROTEIN OS=Homo<br>sapiens PE=2 SV=1 | 491.1<br>5 | 12 | 16 135 161 260 344 613<br>647 657 759 771 933<br>1144        | 22.9 |
| 13 | P10809 | 60 kDa heat shock protein, mitochondrial OS=Homo sapiens<br>GN=HSPD1 PE=1 SV=2                                             | 482.5<br>7 | 10 | 165 180 317 366 418<br>506 911 929 1050 1116                 | 16.5 |
|    | B3GQS7 | Mitochondrial heat shock 60kD protein 1 variant 1 OS=Homo<br>sapiens GN=HSPD1 PE=2 SV=1                                    | 482.5<br>7 | 10 | 165 180 317 366 418<br>506 911 929 1050 1116                 | 16.5 |
| 14 | P02768 | Serum albumin OS=Homo sapiens GN=ALB PE=1 SV=2                                                                             | 470.8<br>5 | 10 | 170 315 414 801 873<br>897 1001 1074 1177<br>1188            | 17.4 |

|    |        |                                                                                                                                 |            |    |                                                   |      |
|----|--------|---------------------------------------------------------------------------------------------------------------------------------|------------|----|---------------------------------------------------|------|
|    | F6KPG5 | Albumin (Fragment) OS=Homo sapiens PE=2 SV=1                                                                                    | 470.8<br>5 | 10 | 170 315 414 801 873<br>897 1001 1074 1177<br>1188 | 17.4 |
|    | B4DPP6 | cDNA FLJ54371, highly similar to Serum albumin OS=Homo sapiens PE=2 SV=1                                                        | 470.8<br>5 | 10 | 170 315 414 801 873<br>897 1001 1074 1177<br>1188 | 17.4 |
|    | B2RBS8 | cDNA, FLJ95666, highly similar to Homo sapiens albumin (ALB), mRNA OS=Homo sapiens PE=2 SV=1                                    | 470.8<br>5 | 10 | 170 315 414 801 873<br>897 1001 1074 1177<br>1188 | 17.4 |
| 15 | Q5VU66 | Tropomyosin alpha-3 chain OS=Homo sapiens GN=TPM3 PE=4 SV=1                                                                     | 459.5<br>6 | 10 | 77 142 283 295 362 488<br>508 525 1029 1081       | 50.4 |
|    | B2RDE1 | cDNA, FLJ96568, highly similar to Homo sapiens tropomyosin 3 (TPM3), mRNA OS=Homo sapiens PE=2 SV=1                             | 459.5<br>6 | 10 | 77 142 283 295 362 488<br>508 525 1029 1081       | 50.4 |
| 16 | P16401 | Histone H1.5 OS=Homo sapiens GN=HIST1H1B PE=1 SV=3                                                                              | 442.1<br>8 | 8  | 91 188 311 413 479 536<br>775 819                 | 31.9 |
| 17 | P07910 | Heterogeneous nuclear ribonucleoproteins C1/C2 OS=Homo sapiens GN=HNRNPC PE=1 SV=4                                              | 437.5<br>6 | 10 | 217 279 361 401 754<br>780 940 1006 1192<br>1221  | 27.5 |
|    | G3V4C1 | Heterogeneous nuclear ribonucleoproteins C1/C2 OS=Homo sapiens GN=HNRNPC PE=2 SV=1                                              | 437.5<br>6 | 10 | 217 279 361 401 754<br>780 940 1006 1192<br>1221  | 27.5 |
|    | G3V2Q1 | Heterogeneous nuclear ribonucleoproteins C1/C2 OS=Homo sapiens GN=HNRNPC PE=2 SV=1                                              | 437.5<br>6 | 10 | 217 279 361 401 754<br>780 940 1006 1192<br>1221  | 27.5 |
|    | A8K9A4 | cDNA FLJ75154, highly similar to Homo sapiens heterogeneous nuclear ribonucleoprotein C (C1/C2), mRNA OS=Homo sapiens PE=2 SV=1 | 437.5<br>6 | 10 | 217 279 361 401 754<br>780 940 1006 1192<br>1221  | 27.5 |
| 18 | P42167 | Lamina-associated polypeptide 2, isoforms beta/gamma OS=Homo sapiens GN=TMPO PE=1 SV=2                                          | 399.6<br>5 | 8  | 140 402 421 549 650<br>690 778 856                | 31.5 |
|    | P42166 | Lamina-associated polypeptide 2, isoform alpha OS=Homo sapiens GN=TMPO PE=1 SV=2                                                | 399.6<br>5 | 8  | 140 402 421 549 650<br>690 778 856                | 31.5 |
|    | G5E972 | Thymopentin OS=Homo sapiens GN=TMPO PE=4 SV=1                                                                                   | 399.6<br>5 | 8  | 140 402 421 549 650<br>690 778 856                | 31.5 |
|    | A2T926 | Thymopentin OS=Homo sapiens GN=TMPO PE=2 SV=1                                                                                   | 399.6<br>5 | 8  | 140 402 421 549 650<br>690 778 856                | 31.5 |
| 19 | Q6FGD7 | TBCA protein OS=Homo sapiens GN=TBCA PE=2 SV=1                                                                                  | 385.1<br>2 | 8  | 83 94 393 495 730 776<br>827 1012                 | 69.0 |
|    | O75347 | Tubulin-specific chaperone A OS=Homo sapiens GN=TBCA PE=1 SV=3                                                                  | 385.1<br>2 | 8  | 83 94 393 495 730 776<br>827 1012                 | 69.0 |
|    | E5RJD8 | Tubulin-specific chaperone A OS=Homo sapiens GN=TBCA PE=2 SV=1                                                                  | 385.1<br>2 | 8  | 83 94 393 495 730 776<br>827 1012                 | 69.0 |
|    | E5RIW3 | Tubulin-specific chaperone A OS=Homo sapiens GN=TBCA PE=2 SV=1                                                                  | 385.1<br>2 | 8  | 83 94 393 495 730 776<br>827 1012                 | 69.0 |
| 20 | P19338 | Nucleolin OS=Homo sapiens GN=NCL PE=1 SV=3                                                                                      | 375.2<br>5 | 9  | 38 371 496 507 521 623<br>772 937 1036            | 16.6 |
| 21 | P09651 | Heterogeneous nuclear ribonucleoprotein A1 OS=Homo sapiens GN=HNRNPA1 PE=1 SV=5                                                 | 368.1<br>3 | 7  | 168 320 545 591 601<br>798 1055                   | 29.6 |

|    |        |                                                                                 |            |    |                                           |  |      |
|----|--------|---------------------------------------------------------------------------------|------------|----|-------------------------------------------|--|------|
|    | F8W6I7 | Heterogeneous nuclear ribonucleoprotein A1 OS=Homo sapiens GN=HNRNPA1 PE=2 SV=1 | 368.1<br>3 | 7  | 168 320 545 591 601<br>798 1055           |  | 29.6 |
|    | F8VXY0 | Heterogeneous nuclear ribonucleoprotein A1 OS=Homo sapiens GN=HNRNPA1 PE=2 SV=1 | 368.1<br>3 | 7  | 168 320 545 591 601<br>798 1055           |  | 29.6 |
|    | F8VRQ1 | Heterogeneous nuclear ribonucleoprotein A1 OS=Homo sapiens GN=HNRNPA1 PE=2 SV=1 | 368.1<br>3 | 7  | 168 320 545 591 601<br>798 1055           |  | 29.6 |
| 22 | Q6DEN2 | DPYSL3 protein OS=Homo sapiens GN=DPYSL3 PE=2 SV=1                              | 360.1<br>8 | 7  | 608 661 688 747 934<br>1092 1158          |  | 12.6 |
| 23 | Q92945 | Far upstream element-binding protein 2 OS=Homo sapiens GN=KHSRP PE=1 SV=4       | 359.8<br>0 | 6  | 159 603 862 871 914<br>1098               |  | 9.1  |
| 24 | P06733 | Alpha-enolase OS=Homo sapiens GN=ENO1 PE=1 SV=2                                 | 343.9<br>5 | 10 | 65 72 268 290 356 769<br>822 852 983 1189 |  | 27.9 |
| 25 | P07737 | Profilin-1 OS=Homo sapiens GN=PFN1 PE=1 SV=2                                    | 341.6<br>4 | 5  | 108 701 1022 1068<br>1214                 |  | 32.1 |
| 26 | P62937 | Peptidyl-prolyl cis-trans isomerase A OS=Homo sapiens GN=PPIA PE=1 SV=2         | 341.5<br>3 | 6  | 271 586 616 1089 1097<br>1142             |  | 41.2 |
| 27 | P67809 | Nuclease-sensitive element-binding protein 1 OS=Homo sapiens GN=YBX1 PE=1 SV=3  | 324.0<br>5 | 5  | 26 92 164 519 1080                        |  | 29.9 |
| 28 | Q99879 | Histone H2B type 1-M OS=Homo sapiens GN=HIST1H2BM PE=1 SV=3                     | 317.9<br>9 | 8  | 216 261 284 415 737<br>761 975 1016       |  | 55.8 |
|    | I6L9F7 | Histone H2B (Fragment) OS=Homo sapiens GN=HIST1H2BM PE=2 SV=1                   | 317.9<br>9 | 8  | 216 261 284 415 737<br>761 975 1016       |  | 55.8 |
| 29 | Q9P2E9 | Ribosome-binding protein 1 OS=Homo sapiens GN=RRBP1 PE=1 SV=4                   | 300.2<br>1 | 6  | 124 293 377 708 997<br>1183               |  | 4.6  |
| 30 | P38159 | RNA-binding motif protein, X chromosome OS=Homo sapiens GN=RBMX PE=1 SV=3       | 288.0<br>7 | 7  | 87 109 162 166 262 338<br>550             |  | 18.4 |
| 31 | Q14103 | Heterogeneous nuclear ribonucleoprotein D0 OS=Homo sapiens GN=HNRNPD PE=1 SV=1  | 283.5<br>4 | 7  | 179 424 632 764 941<br>1149 1154          |  | 21.7 |
| 32 | P07900 | Heat shock protein HSP 90-alpha OS=Homo sapiens GN=HSP90AA1 PE=1 SV=5           | 282.2<br>0 | 7  | 126 527 570 643 953<br>1056 1164          |  | 3.5  |
|    | K9JA46 | Epididymis luminal secretory protein 52 OS=Homo sapiens GN=EL52 PE=2 SV=1       | 282.2<br>0 | 7  | 126 527 570 643 953<br>1056 1164          |  | 3.5  |
| 33 | Q60FE2 | MYH9 variant protein OS=Homo sapiens GN=MYH9 PE=2 SV=1                          | 276.0<br>1 | 6  | 426 517 605 768 906<br>932                |  | 4.6  |
|    | P35579 | Myosin-9 OS=Homo sapiens GN=MYH9 PE=1 SV=4                                      | 276.0<br>1 | 6  | 426 517 605 768 906<br>932                |  | 4.6  |
| 34 | Q0VAS5 | Histone H4 OS=Homo sapiens GN=HIST1H4H PE=2 SV=1                                | 274.0<br>0 | 6  | 78 237 409 611 965<br>1010                |  | 52.4 |
|    | P62805 | Histone H4 OS=Homo sapiens GN=HIST1H4A PE=1 SV=2                                | 274.0<br>0 | 6  | 78 237 409 611 965<br>1010                |  | 52.4 |
|    | B2R4R0 | Histone H4 OS=Homo sapiens GN=HIST1H4J PE=2 SV=1                                | 274.0<br>0 | 6  | 78 237 409 611 965<br>1010                |  | 52.4 |
| 35 | P16949 | Stathmin OS=Homo sapiens GN=STMN1 PE=1 SV=3                                     | 267.8<br>0 | 6  | 115 563 639 952 957<br>1046               |  | 32.9 |
|    | B5BU83 | Stathmin OS=Homo sapiens GN=STMN1 PE=2 SV=1                                     | 267.8<br>0 | 6  | 115 563 639 952 957<br>1046               |  | 32.9 |

|    |        |                                                                                                                                                           |            |   |                                  |  |      |
|----|--------|-----------------------------------------------------------------------------------------------------------------------------------------------------------|------------|---|----------------------------------|--|------|
| 36 | Q4LE64 | NUMA1 variant protein (Fragment) OS=Homo sapiens<br>GN=NUMA1 variant protein PE=2 SV=1                                                                    | 265.5<br>7 | 5 | 6 753 872 1030 1119              |  | 4.7  |
|    | Q14980 | Nuclear mitotic apparatus protein 1 OS=Homo sapiens<br>GN=NUMA1 PE=1 SV=2                                                                                 | 265.5<br>7 | 5 | 6 753 872 1030 1119              |  | 4.7  |
| 37 | P31947 | 14-3-3 protein sigma OS=Homo sapiens GN=SFN PE=1 SV=1                                                                                                     | 264.4<br>2 | 6 | 9 80 347 398 442 742             |  | 28.6 |
| 38 | P04406 | Glyceraldehyde-3-phosphate dehydrogenase OS=Homo sapiens<br>GN=GAPDH PE=1 SV=3                                                                            | 264.1<br>8 | 5 | 68 429 699 979 1077              |  | 25.5 |
| 39 | Q53F64 | Heterogeneous nuclear ribonucleoprotein AB isoform a variant (Fragment) OS=Homo sapiens PE=2 SV=1                                                         | 264.1<br>0 | 6 | 44 618 633 671 912<br>1205       |  | 17.6 |
|    | D6RD18 | Heterogeneous nuclear ribonucleoprotein A/B OS=Homo sapiens GN=HNRNPAB PE=2 SV=1                                                                          | 264.1<br>0 | 6 | 44 618 633 671 912<br>1205       |  | 17.6 |
|    | D6RBZ0 | Heterogeneous nuclear ribonucleoprotein A/B OS=Homo sapiens GN=HNRNPAB PE=2 SV=1                                                                          | 264.1<br>0 | 6 | 44 618 633 671 912<br>1205       |  | 17.6 |
|    | D6R9P3 | Heterogeneous nuclear ribonucleoprotein A/B OS=Homo sapiens GN=HNRNPAB PE=2 SV=1                                                                          | 264.1<br>0 | 6 | 44 618 633 671 912<br>1205       |  | 17.6 |
|    | B4DMY3 | cDNA FLJ60713, highly similar to Homo sapiens heterogeneous nuclear ribonucleoprotein A/B (HNRNPAB), transcript variant 1, mRNA OS=Homo sapiens PE=2 SV=1 | 264.1<br>0 | 6 | 44 618 633 671 912<br>1205       |  | 17.6 |
| 40 | P06748 | Nucleophosmin OS=Homo sapiens GN=NPM1 PE=1 SV=2                                                                                                           | 263.4<br>7 | 7 | 59 276 332 539 845 875<br>1041   |  | 24.5 |
| 41 | Q68CT4 | Putative uncharacterized protein DKFZp686A1668 OS=Homo sapiens GN=DKFZp686A1668 PE=2 SV=1                                                                 | 258.7<br>4 | 6 | 167 399 511 904 935<br>1065      |  | 5.8  |
|    | O75369 | Filamin-B OS=Homo sapiens GN=FLNB PE=1 SV=2                                                                                                               | 258.7<br>4 | 6 | 167 399 511 904 935<br>1065      |  | 5.8  |
|    | E7EN95 | Filamin-B OS=Homo sapiens GN=FLNB PE=2 SV=1                                                                                                               | 258.7<br>4 | 6 | 167 399 511 904 935<br>1065      |  | 5.8  |
| 42 | P61604 | 10 kDa heat shock protein, mitochondrial OS=Homo sapiens<br>GN=HSPE1 PE=1 SV=2                                                                            | 258.0<br>6 | 4 | 499 962 1099 1165                |  | 42.2 |
| 43 | Q86TY5 | Full-length cDNA clone CS0DI041YE05 of Placenta of Homo sapiens (human) OS=Homo sapiens PE=2 SV=1                                                         | 255.8<br>5 | 7 | 132 171 406 452 542<br>1018 1019 |  | 34.8 |
|    | Q6FGL0 | LGALS3 protein (Fragment) OS=Homo sapiens GN=LGALS3 PE=2 SV=1                                                                                             | 255.8<br>5 | 7 | 132 171 406 452 542<br>1018 1019 |  | 34.8 |
|    | Q59FR8 | LGALS3 protein variant (Fragment) OS=Homo sapiens PE=2 SV=1                                                                                               | 255.8<br>5 | 7 | 132 171 406 452 542<br>1018 1019 |  | 34.8 |
|    | P17931 | Galectin-3 OS=Homo sapiens GN=LGALS3 PE=1 SV=5                                                                                                            | 255.8<br>5 | 7 | 132 171 406 452 542<br>1018 1019 |  | 34.8 |
| 44 | H7BYY1 | Tropomyosin 1 (Alpha), isoform CRA_m OS=Homo sapiens<br>GN=TPM1 PE=3 SV=1                                                                                 | 255.4<br>8 | 6 | 425 470 577 750 949<br>1146      |  | 48.4 |
| 45 | Q9Y2W1 | Thyroid hormone receptor-associated protein 3 OS=Homo sapiens GN=THRAP3 PE=1 SV=2                                                                         | 254.7<br>2 | 4 | 75 157 478 1196                  |  | 4.3  |
| 46 | Q15149 | Plectin OS=Homo sapiens GN=PLEC PE=1 SV=3                                                                                                                 | 253.1<br>5 | 6 | 117 222 500 783 899<br>1117      |  | 2.5  |
| 47 | P05783 | Keratin, type I cytoskeletal 18 OS=Homo sapiens<br>GN=KRT18 PE=1 SV=2                                                                                     | 250.4<br>8 | 7 | 43 491 512 589 676<br>1093 1139  |  | 20.7 |

|    |        |                                                                                                                                                                                                                         |            |   |                             |  |      |
|----|--------|-------------------------------------------------------------------------------------------------------------------------------------------------------------------------------------------------------------------------|------------|---|-----------------------------|--|------|
| 48 | P29966 | Myristoylated alanine-rich C-kinase substrate OS=Homo sapiens GN=MARCKS PE=1 SV=4                                                                                                                                       | 240.6<br>5 | 4 | 582 696 864 931             |  | 24.7 |
| 49 | Q14512 | Fibroblast growth factor-binding protein 1 OS=Homo sapiens GN=FGFBP1 PE=1 SV=1                                                                                                                                          | 238.6<br>9 | 5 | 687 815 816 868 995         |  | 16.2 |
| 50 | P40925 | Malate dehydrogenase, cytoplasmic OS=Homo sapiens GN=MDH1 PE=1 SV=4                                                                                                                                                     | 234.1<br>6 | 5 | 257 303 345 1198 1220       |  | 18.0 |
| 51 | P63104 | 14-3-3 protein zeta/delta OS=Homo sapiens GN=YWHAZ PE=1 SV=1                                                                                                                                                            | 228.7<br>6 | 4 | 289 546 685 1167            |  | 19.6 |
|    | E7EX29 | 14-3-3 protein zeta/delta (Fragment) OS=Homo sapiens GN=YWHAZ PE=2 SV=1                                                                                                                                                 | 228.7<br>6 | 4 | 289 546 685 1167            |  | 19.6 |
|    | E7ESK7 | 14-3-3 protein zeta/delta (Fragment) OS=Homo sapiens GN=YWHAZ PE=2 SV=1                                                                                                                                                 | 228.7<br>6 | 4 | 289 546 685 1167            |  | 19.6 |
|    | D0PNI1 | Tyrosine 3-monooxygenase/tryptophan 5-monooxygenase activation protein zeta polypeptide OS=Homo sapiens GN=YWHAZ PE=2 SV=1                                                                                              | 228.7<br>6 | 4 | 289 546 685 1167            |  | 19.6 |
| 52 | Q5TCU3 | Tropomyosin beta chain OS=Homo sapiens GN=TPM2 PE=2 SV=1                                                                                                                                                                | 221.3<br>9 | 5 | 107 203 625 828 1045        |  | 35.9 |
| 53 | P05067 | Amyloid beta A4 protein OS=Homo sapiens GN=APP PE=1 SV=3                                                                                                                                                                | 215.6<br>4 | 6 | 93 325 612 712 1106<br>1147 |  | 8.4  |
|    | H7C0V9 | Gamma-secretase C-terminal fragment 59 (Fragment) OS=Homo sapiens GN=APP PE=4 SV=1                                                                                                                                      | 215.6<br>4 | 6 | 93 325 612 712 1106<br>1147 |  | 8.4  |
|    | E9PG40 | Gamma-secretase C-terminal fragment 59 OS=Homo sapiens GN=APP PE=2 SV=1                                                                                                                                                 | 215.6<br>4 | 6 | 93 325 612 712 1106<br>1147 |  | 8.4  |
|    | B4DGD0 | cDNA FLJ50491, highly similar to Amyloid beta A4 protein (APP) (ABPP)(Alzheimer disease amyloid protein) (Cerebral vascularamyloid peptide) (CVAP) (Protease nexin-II) (PN-II) (APPI) (PreA4) OS=Homo sapiens PE=2 SV=1 | 215.6<br>4 | 6 | 93 325 612 712 1106<br>1147 |  | 8.4  |
| 54 | Q86V58 | Fibulin 2 OS=Homo sapiens GN=FBLN2 PE=2 SV=1                                                                                                                                                                            | 215.5<br>8 | 3 | 762 927 1153                |  | 4.1  |
|    | P98095 | Fibulin-2 OS=Homo sapiens GN=FBLN2 PE=1 SV=2                                                                                                                                                                            | 215.5<br>8 | 3 | 762 927 1153                |  | 4.1  |
|    | F5H1F3 | Fibulin-2 OS=Homo sapiens GN=FBLN2 PE=2 SV=1                                                                                                                                                                            | 215.5<br>8 | 3 | 762 927 1153                |  | 4.1  |
|    | B7Z9B8 | cDNA FLJ56912, highly similar to Fibulin-2 OS=Homo sapiens PE=2 SV=1                                                                                                                                                    | 215.5<br>8 | 3 | 762 927 1153                |  | 4.1  |
| 55 | H7BZJ3 | Thioredoxin (Fragment) OS=Homo sapiens GN=PDIA3 PE=2 SV=1                                                                                                                                                               | 211.5<br>1 | 3 | 431 693 728                 |  | 30.1 |
| 56 | P23193 | Transcription elongation factor A protein 1 OS=Homo sapiens GN=TCEA1 PE=1 SV=2                                                                                                                                          | 211.4<br>3 | 3 | 121 455 1104                |  | 15.0 |
| 57 | Q9UQ80 | Proliferation-associated protein 2G4 OS=Homo sapiens GN=PA2G4 PE=1 SV=3                                                                                                                                                 | 211.0<br>5 | 3 | 113 193 789                 |  | 13.2 |
| 58 | P14618 | Pyruvate kinase isozymes M1/M2 OS=Homo sapiens GN=PKM PE=1 SV=4                                                                                                                                                         | 210.7<br>0 | 5 | 703 1048 1069 1185<br>1199  |  | 16.4 |
| 59 | O43707 | Alpha-actinin-4 OS=Homo sapiens GN=ACTN4 PE=1 SV=2                                                                                                                                                                      | 209.9<br>5 | 5 | 459 619 790 829 1100        |  | 9.4  |

|    |        |                                                              |            |   |                  |  |      |
|----|--------|--------------------------------------------------------------|------------|---|------------------|--|------|
| 60 | Q6NZ55 | 60S ribosomal protein L13 OS=Homo sapiens GN=RPL13 PE=2 SV=1 | 207.6<br>2 | 4 | 211 902 998 1075 |  | 18.0 |
|    | P26373 | 60S ribosomal protein L13 OS=Homo sapiens GN=RPL13 PE=1 SV=4 | 207.6<br>2 | 4 | 211 902 998 1075 |  | 18.0 |
|    | A8K4C8 | 60S ribosomal protein L13 OS=Homo sapiens GN=RPL13 PE=2 SV=1 | 207.6<br>2 | 4 | 211 902 998 1075 |  | 18.0 |

**UniProt  
Human  
Protein  
IDs,  
cont.**

| Gr<br>p<br>Nr. | Accession<br>Number | Protein Name                                                                                                 | Protein<br>Score | Unique<br>PSMs | PSM Serial Nrs.       | Other<br>Grp. | %<br>Seq.<br>Cover. |
|----------------|---------------------|--------------------------------------------------------------------------------------------------------------|------------------|----------------|-----------------------|---------------|---------------------|
| 61             | Q7KYM9              | ORF protein OS=Homo sapiens GN=ORF PE=2 SV=1                                                                 | 202.9<br>5       | 4              | 654 823 881 886       |               | 12.0                |
|                | Q59ES8              | Heterogeneous nuclear ribonucleoprotein M isoform a variant (Fragment) OS=Homo sapiens PE=2 SV=1             | 202.9<br>5       | 4              | 654 823 881 886       |               | 12.0                |
|                | P52272              | Heterogeneous nuclear ribonucleoprotein M OS=Homo sapiens GN=HNRNPM PE=1 SV=3                                | 202.9<br>5       | 4              | 654 823 881 886       |               | 12.0                |
| 62             | Q03252              | Lamin-B2 OS=Homo sapiens GN=LMNB2 PE=1 SV=3                                                                  | 201.3<br>9       | 5              | 220 228 672 1031 1124 |               | 12.4                |
|                | J9JID7              | Lamin B2, isoform CRA_a OS=Homo sapiens GN=LMNB2 PE=3 SV=1                                                   | 201.3<br>9       | 5              | 220 228 672 1031 1124 |               | 12.4                |
| 63             | Q9BSV4              | SFPQ protein (Fragment) OS=Homo sapiens GN=SFPQ PE=2 SV=2                                                    | 199.6<br>6       | 5              | 47 826 916 1072 1082  |               | 12.3                |
|                | P23246              | Splicing factor, proline- and glutamine-rich OS=Homo sapiens GN=SFPQ PE=1 SV=2                               | 199.6<br>6       | 5              | 47 826 916 1072 1082  |               | 12.3                |
| 64             | Q9H1E3              | Nuclear ubiquitous casein and cyclin-dependent kinase substrate 1 OS=Homo sapiens GN=NUCKS1 PE=1 SV=1        | 199.4<br>1       | 5              | 50 417 562 665 710    |               | 20.6                |
| 65             | P39019              | 40S ribosomal protein S19 OS=Homo sapiens GN=RPS19 PE=1 SV=2                                                 | 199.2<br>3       | 4              | 29 127 258 532        |               | 24.8                |
|                | B0ZBD0              | 40S ribosomal protein S19 OS=Homo sapiens GN=RPS19 PE=2 SV=1                                                 | 199.2<br>3       | 4              | 29 127 258 532        |               | 24.8                |
| 66             | P11940              | Polyadenylate-binding protein 1 OS=Homo sapiens GN=PABPC1 PE=1 SV=2                                          | 198.0<br>2       | 5              | 489 537 626 651 1212  |               | 14.9                |
|                | B3KT93              | cDNA FLJ37875 fis, clone BRSSN2018771, highly similar to Poly(A)-binding protein 1 OS=Homo sapiens PE=2 SV=1 | 198.0<br>2       | 5              | 489 537 626 651 1212  |               | 14.9                |
| 67             | P62263              | 40S ribosomal protein S14 OS=Homo sapiens GN=RPS14 PE=1 SV=3                                                 | 196.9<br>8       | 5              | 81 111 473 1049 1191  |               | 24.5                |

|    |        |                                                                                    |            |   |                      |  |      |
|----|--------|------------------------------------------------------------------------------------|------------|---|----------------------|--|------|
| 68 | Q5U071 | High-mobility group box 2 OS=Homo sapiens PE=2 SV=1                                | 196.4<br>3 | 5 | 312 388 597 781 1155 |  | 13.0 |
|    | P26583 | High mobility group protein B2 OS=Homo sapiens<br>GN=HMGB2 PE=1 SV=2               | 196.4<br>3 | 5 | 312 388 597 781 1155 |  | 13.0 |
| 69 | Q71DI3 | Histone H3.2 OS=Homo sapiens GN=HIST2H3A PE=1 SV=3                                 | 195.6<br>3 | 5 | 28 130 266 725 980   |  | 36.8 |
|    | Q16695 | Histone H3.1t OS=Homo sapiens GN=HIST3H3 PE=1 SV=3                                 | 195.6<br>3 | 5 | 28 130 266 725 980   |  | 36.8 |
|    | P84243 | Histone H3.3 OS=Homo sapiens GN=H3F3A PE=1 SV=2                                    | 195.6<br>3 | 5 | 28 130 266 725 980   |  | 36.8 |
|    | P68431 | Histone H3.1 OS=Homo sapiens GN=HIST1H3A PE=1 SV=2                                 | 195.6<br>3 | 5 | 28 130 266 725 980   |  | 36.8 |
|    | K7EK07 | Histone H3 (Fragment) OS=Homo sapiens GN=H3F3B PE=3<br>SV=1                        | 195.6<br>3 | 5 | 28 130 266 725 980   |  | 36.8 |
|    | B4E380 | Histone H3 OS=Homo sapiens PE=2 SV=1                                               | 195.6<br>3 | 5 | 28 130 266 725 980   |  | 36.8 |
|    | B2R4P9 | Histone H3 OS=Homo sapiens GN=H3F3A PE=2 SV=1                                      | 195.6<br>3 | 5 | 28 130 266 725 980   |  | 36.8 |
| 70 | P26038 | Moesin OS=Homo sapiens GN=MSN PE=1 SV=3                                            | 192.9<br>7 | 5 | 95 323 850 879 1073  |  | 8.8  |
| 71 | O94907 | Dickkopf-related protein 1 OS=Homo sapiens GN=DKK1<br>PE=1 SV=1                    | 191.0<br>1 | 4 | 145 282 468 938      |  | 15.8 |
|    | I1W660 | Dickkopf-like protein 1 OS=Homo sapiens GN=DKK1 PE=2<br>SV=1                       | 191.0<br>1 | 4 | 145 282 468 938      |  | 15.8 |
| 72 | P08107 | Heat shock 70 kDa protein 1A/1B OS=Homo sapiens<br>GN=HSPA1A PE=1 SV=5             | 183.7<br>5 | 4 | 492 809 1054 1115    |  | 15.9 |
|    | A8K5I0 | Heat shock 70kDa protein 1A OS=Homo sapiens<br>GN=HSPA1A PE=2 SV=1                 | 183.7<br>5 | 4 | 492 809 1054 1115    |  | 15.9 |
| 73 | Q04695 | Keratin, type I cytoskeletal 17 OS=Homo sapiens GN=KRT17<br>PE=1 SV=2              | 177.8<br>6 | 4 | 485 628 945 1186     |  | 11.1 |
| 74 | P00338 | L-lactate dehydrogenase A chain OS=Homo sapiens<br>GN=LDHA PE=1 SV=2               | 175.2<br>6 | 4 | 580 704 990 1102     |  | 18.7 |
| 75 | Q14847 | LIM and SH3 domain protein 1 OS=Homo sapiens GN=LASP1<br>PE=1 SV=2                 | 175.2<br>0 | 4 | 189 336 617 756      |  | 15.7 |
| 76 | Q6IQ15 | EEF1A1 protein OS=Homo sapiens GN=EEF1A1 PE=2 SV=1                                 | 172.0<br>8 | 4 | 522 559 739 887      |  | 11.1 |
|    | Q6IPT9 | Elongation factor 1-alpha OS=Homo sapiens GN=EEF1A1<br>PE=2 SV=1                   | 172.0<br>8 | 4 | 522 559 739 887      |  | 11.1 |
|    | Q6IPS9 | Elongation factor 1-alpha OS=Homo sapiens GN=EEF1A1<br>PE=2 SV=1                   | 172.0<br>8 | 4 | 522 559 739 887      |  | 11.1 |
|    | Q6IPN6 | Elongation factor 1-alpha OS=Homo sapiens GN=EEF1A1<br>PE=2 SV=1                   | 172.0<br>8 | 4 | 522 559 739 887      |  | 11.1 |
|    | Q5VTE0 | Putative elongation factor 1-alpha-like 3 OS=Homo sapiens<br>GN=EEF1A1P5 PE=5 SV=1 | 172.0<br>8 | 4 | 522 559 739 887      |  | 11.1 |
|    | Q53HQ7 | Elongation factor 1-alpha (Fragment) OS=Homo sapiens<br>PE=2 SV=1                  | 172.0<br>8 | 4 | 522 559 739 887      |  | 11.1 |



|    |        |                                                                                                      |            |   |                        |  |      |
|----|--------|------------------------------------------------------------------------------------------------------|------------|---|------------------------|--|------|
|    | Q53HM9 | Elongation factor 1-alpha (Fragment) OS=Homo sapiens<br>PE=2 SV=1                                    | 172.0<br>8 | 4 | 522 559 739 887        |  | 11.1 |
|    | Q53GE9 | Elongation factor 1-alpha (Fragment) OS=Homo sapiens<br>PE=2 SV=1                                    | 172.0<br>8 | 4 | 522 559 739 887        |  | 11.1 |
|    | Q53GA1 | Elongation factor 1-alpha (Fragment) OS=Homo sapiens<br>PE=2 SV=1                                    | 172.0<br>8 | 4 | 522 559 739 887        |  | 11.1 |
|    | Q53G85 | Elongation factor 1-alpha (Fragment) OS=Homo sapiens<br>PE=2 SV=1                                    | 172.0<br>8 | 4 | 522 559 739 887        |  | 11.1 |
| 77 | Q53HU8 | Vimentin variant (Fragment) OS=Homo sapiens PE=2 SV=1                                                | 171.4<br>9 | 4 | 370 602 673 1204       |  | 13.5 |
|    | P08670 | Vimentin OS=Homo sapiens GN=VIM PE=1 SV=4                                                            | 171.4<br>9 | 4 | 370 602 673 1204       |  | 13.5 |
|    | B3KRK8 | cDNA FLJ34494 fis, clone HLUNG2005030, highly similar to<br>VIMENTIN OS=Homo sapiens PE=2 SV=1       | 171.4<br>9 | 4 | 370 602 673 1204       |  | 13.5 |
|    | B0YJC4 | Vimentin OS=Homo sapiens GN=VIM PE=3 SV=1                                                            | 171.4<br>9 | 4 | 370 602 673 1204       |  | 13.5 |
| 78 | P00558 | Phosphoglycerate kinase 1 OS=Homo sapiens GN=PGK1<br>PE=1 SV=3                                       | 163.8<br>9 | 3 | 226 333 1101           |  | 13.4 |
|    | B7Z7A9 | Phosphoglycerate kinase OS=Homo sapiens GN=PGK1<br>PE=2 SV=1                                         | 163.8<br>9 | 3 | 226 333 1101           |  | 13.4 |
| 79 | Q07955 | Serine/arginine-rich splicing factor 1 OS=Homo sapiens<br>GN=SRSF1 PE=1 SV=2                         | 163.7<br>0 | 4 | 96 292 751 837         |  | 13.8 |
|    | J3KTL2 | Serine/arginine-rich-splicing factor 1 OS=Homo sapiens<br>GN=SRSF1 PE=4 SV=1                         | 163.7<br>0 | 4 | 96 292 751 837         |  | 13.8 |
| 80 | Q99988 | Growth/differentiation factor 15 OS=Homo sapiens<br>GN=GDF15 PE=1 SV=3                               | 162.4<br>9 | 6 | 61 198 239 241 254 510 |  | 26.6 |
| 81 | P35527 | Keratin, type I cytoskeletal 9 OS=Homo sapiens GN=KRT9<br>PE=1 SV=3                                  | 159.9<br>7 | 2 | 678 831                |  | 5.8  |
| 82 | Q15102 | Platelet-activating factor acetylhydrolase IB subunit gamma<br>OS=Homo sapiens GN=PFAFH1B3 PE=1 SV=1 | 159.3<br>8 | 4 | 677 709 1009 1113      |  | 18.2 |
| 83 | Q5TZP7 | APEX nuclease (Multifunctional DNA repair enzyme) 1<br>OS=Homo sapiens GN=APEX1 PE=2 SV=1            | 159.0<br>3 | 3 | 449 719 755            |  | 12.5 |
|    | P27695 | DNA-(apurinic or apyrimidinic site) lyase OS=Homo sapiens<br>GN=APEX1 PE=1 SV=2                      | 159.0<br>3 | 3 | 449 719 755            |  | 12.5 |
|    | G3V5Q1 | DNA-(apurinic or apyrimidinic site) lyase (Fragment)<br>OS=Homo sapiens GN=APEX1 PE=2 SV=1           | 159.0<br>3 | 3 | 449 719 755            |  | 12.5 |
|    | G3V3M6 | DNA-(apurinic or apyrimidinic site) lyase (Fragment)<br>OS=Homo sapiens GN=APEX1 PE=2 SV=1           | 159.0<br>3 | 3 | 449 719 755            |  | 12.5 |
| 84 | Q6IBA2 | PC4 protein OS=Homo sapiens GN=PC4 PE=2 SV=1                                                         | 158.9<br>1 | 3 | 319 353 1217           |  | 34.6 |
|    | Q59G24 | Activated RNA polymerase II transcription cofactor 4 variant<br>(Fragment) OS=Homo sapiens PE=2 SV=1 | 158.9<br>1 | 3 | 319 353 1217           |  | 34.6 |
|    | P53999 | Activated RNA polymerase II transcriptional coactivator p15<br>OS=Homo sapiens GN=SUB1 PE=1 SV=3     | 158.9<br>1 | 3 | 319 353 1217           |  | 34.6 |
| 85 | P04264 | Keratin, type II cytoskeletal 1 OS=Homo sapiens GN=KRT1<br>PE=1 SV=6                                 | 158.0<br>2 | 3 | 583 925 1033           |  | 4.7  |



|    |        |                                                                                                                                      |            |   |                    |  |      |
|----|--------|--------------------------------------------------------------------------------------------------------------------------------------|------------|---|--------------------|--|------|
|    | H6VRG3 | Keratin 1 OS=Homo sapiens GN=KRT1 PE=3 SV=1                                                                                          | 158.0<br>2 | 3 | 583 925 1033       |  | 4.7  |
|    | H6VRG2 | Keratin 1 OS=Homo sapiens GN=KRT1 PE=3 SV=1                                                                                          | 158.0<br>2 | 3 | 583 925 1033       |  | 4.7  |
|    | H6VRG1 | Keratin 1 OS=Homo sapiens GN=KRT1 PE=2 SV=1                                                                                          | 158.0<br>2 | 3 | 583 925 1033       |  | 4.7  |
|    | H6VRG0 | Keratin 1 OS=Homo sapiens GN=KRT1 PE=3 SV=1                                                                                          | 158.0<br>2 | 3 | 583 925 1033       |  | 4.7  |
|    | H6VRF9 | Keratin 1 OS=Homo sapiens GN=KRT1 PE=3 SV=1                                                                                          | 158.0<br>2 | 3 | 583 925 1033       |  | 4.7  |
|    | H6VRF8 | Keratin 1 OS=Homo sapiens GN=KRT1 PE=3 SV=1                                                                                          | 158.0<br>2 | 3 | 583 925 1033       |  | 4.7  |
| 86 | Q02790 | Peptidyl-prolyl cis-trans isomerase FKBP4 OS=Homo sapiens GN=FKBP4 PE=1 SV=3                                                         | 156.6<br>0 | 3 | 493 1122 1159      |  | 5.9  |
|    | B2R9U2 | cDNA, FLJ94557, highly similar to Homo sapiens FK506 binding protein 4, 59kDa (FKBP4), mRNA OS=Homo sapiens PE=2 SV=1                | 156.6<br>0 | 3 | 493 1122 1159      |  | 5.9  |
| 87 | P09874 | Poly [ADP-ribose] polymerase 1 OS=Homo sapiens GN=PARP1 PE=1 SV=4                                                                    | 146.4<br>7 | 3 | 42 882 1008        |  | 4.4  |
|    | B2R5W3 | cDNA, FLJ92658, highly similar to Homo sapiens poly (ADP-ribose) polymerase family, member 1 (PARP1), mRNA OS=Homo sapiens PE=2 SV=1 | 146.4<br>7 | 3 | 42 882 1008        |  | 4.4  |
| 88 | P13639 | Elongation factor 2 OS=Homo sapiens GN=EEF2 PE=1 SV=4                                                                                | 142.9<br>8 | 4 | 52 238 305 1038    |  | 5.2  |
| 89 | Q53H03 | Nuclear autoantigenic sperm protein isoform 2 variant (Fragment) OS=Homo sapiens PE=2 SV=1                                           | 142.5<br>0 | 3 | 250 773 907        |  | 3.4  |
|    | P49321 | Nuclear autoantigenic sperm protein OS=Homo sapiens GN=NASP PE=1 SV=2                                                                | 142.5<br>0 | 3 | 250 773 907        |  | 3.4  |
| 90 | Q6IBN1 | HNRPK protein OS=Homo sapiens GN=HNRPK PE=2 SV=1                                                                                     | 142.3<br>6 | 4 | 982 1014 1151 1179 |  | 13.4 |
|    | Q5EC54 | Heterogeneous nuclear ribonucleoprotein K transcript variant OS=Homo sapiens GN=HNRPK PE=2 SV=1                                      | 142.3<br>6 | 4 | 982 1014 1151 1179 |  | 13.4 |
|    | P61978 | Heterogeneous nuclear ribonucleoprotein K OS=Homo sapiens GN=HNRPK PE=1 SV=1                                                         | 142.3<br>6 | 4 | 982 1014 1151 1179 |  | 13.4 |
|    | B4DUQ1 | cDNA FLJ54552, highly similar to Heterogeneous nuclear ribonucleoprotein K OS=Homo sapiens PE=2 SV=1                                 | 142.3<br>6 | 4 | 982 1014 1151 1179 |  | 13.4 |
| 91 | P10909 | Clusterin OS=Homo sapiens GN=CLU PE=1 SV=1                                                                                           | 141.3<br>2 | 2 | 225 242            |  | 9.5  |
|    | H0YC35 | Clusterin (Fragment) OS=Homo sapiens GN=CLU PE=3 SV=1                                                                                | 141.3<br>2 | 2 | 225 242            |  | 9.5  |
|    | E7ETA7 | Clusterin OS=Homo sapiens GN=CLU PE=2 SV=1                                                                                           | 141.3<br>2 | 2 | 225 242            |  | 9.5  |
|    | B4DW11 | cDNA FLJ57622, highly similar to Clusterin OS=Homo sapiens PE=2 SV=1                                                                 | 141.3<br>2 | 2 | 225 242            |  | 9.5  |
| 92 | Q6LAM1 | Heavy chain of factor I (Fragment) OS=Homo sapiens PE=2 SV=1                                                                         | 140.5<br>2 | 2 | 322 991            |  | 8.4  |

|     |        |                                                                                                              |            |   |                      |  |      |
|-----|--------|--------------------------------------------------------------------------------------------------------------|------------|---|----------------------|--|------|
| 93  | Q9Y265 | RuvB-like 1 OS=Homo sapiens GN=RUVBL1 PE=1 SV=1                                                              | 139.6<br>3 | 3 | 4 727 734            |  | 7.7  |
|     | B5BUB1 | RuvB-like 1 (Fragment) OS=Homo sapiens GN=RUVBL1 PE=2 SV=1                                                   | 139.6<br>3 | 3 | 4 727 734            |  | 7.7  |
| 94  | P04792 | Heat shock protein beta-1 OS=Homo sapiens GN=HSPB1 PE=1 SV=2                                                 | 139.6<br>3 | 3 | 187 427 609          |  | 15.1 |
|     | F8WE04 | Heat shock protein beta-1 OS=Homo sapiens GN=HSPB1 PE=2 SV=1                                                 | 139.6<br>3 | 3 | 187 427 609          |  | 15.1 |
| 95  | P08238 | Heat shock protein HSP 90-beta OS=Homo sapiens GN=HSP90AB1 PE=1 SV=4                                         | 139.3<br>4 | 5 | 190 531 534 795 1178 |  | 17.4 |
|     | B4DMA2 | cDNA FLJ54023, highly similar to Heat shock protein HSP 90-beta OS=Homo sapiens PE=2 SV=1                    | 139.3<br>4 | 5 | 190 531 534 795 1178 |  | 17.4 |
| 96  | Q6FHN3 | Nucleoside diphosphate kinase OS=Homo sapiens GN=NME2 PE=2 SV=1                                              | 136.9<br>6 | 3 | 240 469 561          |  | 26.3 |
|     | Q32Q12 | Nucleoside diphosphate kinase OS=Homo sapiens GN=NME1-NME2 PE=2 SV=1                                         | 136.9<br>6 | 3 | 240 469 561          |  | 26.3 |
|     | P22392 | Nucleoside diphosphate kinase B OS=Homo sapiens GN=NME2 PE=1 SV=1                                            | 136.9<br>6 | 3 | 240 469 561          |  | 26.3 |
|     | J3KPD9 | Nucleoside diphosphate kinase B OS=Homo sapiens GN=NME2 PE=3 SV=1                                            | 136.9<br>6 | 3 | 240 469 561          |  | 26.3 |
| 97  | Q15717 | ELAV-like protein 1 OS=Homo sapiens GN=ELAVL1 PE=1 SV=2                                                      | 133.1<br>1 | 2 | 263 314              |  | 9.6  |
|     | B4DVB8 | ELAV-like protein 1 OS=Homo sapiens GN=ELAVL1 PE=2 SV=1                                                      | 133.1<br>1 | 2 | 263 314              |  | 9.6  |
| 98  | P21741 | Midkine OS=Homo sapiens GN=MDK PE=1 SV=1                                                                     | 130.8<br>4 | 3 | 378 666 705          |  | 32.7 |
|     | E9PPJ5 | Midkine (Fragment) OS=Homo sapiens GN=MDK PE=2 SV=1                                                          | 130.8<br>4 | 3 | 378 666 705          |  | 32.7 |
|     | E9PLM6 | Midkine OS=Homo sapiens GN=MDK PE=2 SV=1                                                                     | 130.8<br>4 | 3 | 378 666 705          |  | 32.7 |
| 99  | Q13435 | Splicing factor 3B subunit 2 OS=Homo sapiens GN=SF3B2 PE=1 SV=2                                              | 129.9<br>2 | 2 | 966 1138             |  | 3.4  |
| 100 | Q75MT9 | Malate dehydrogenase (Fragment) OS=Homo sapiens GN=MDH2 PE=2 SV=1                                            | 129.4<br>8 | 3 | 548 972 1034         |  | 20.7 |
|     | Q6FHZ0 | Malate dehydrogenase OS=Homo sapiens GN=MDH2 PE=2 SV=1                                                       | 129.4<br>8 | 3 | 548 972 1034         |  | 20.7 |
|     | Q0QF37 | Malate dehydrogenase (Fragment) OS=Homo sapiens GN=MDH2 PE=2 SV=1                                            | 129.4<br>8 | 3 | 548 972 1034         |  | 20.7 |
|     | P40926 | Malate dehydrogenase, mitochondrial OS=Homo sapiens GN=MDH2 PE=1 SV=3                                        | 129.4<br>8 | 3 | 548 972 1034         |  | 20.7 |
|     | G3XAL0 | Malate dehydrogenase OS=Homo sapiens GN=MDH2 PE=3 SV=1                                                       | 129.4<br>8 | 3 | 548 972 1034         |  | 20.7 |
|     | E9PDB2 | Malate dehydrogenase, mitochondrial OS=Homo sapiens GN=MDH2 PE=2 SV=1                                        | 129.4<br>8 | 3 | 548 972 1034         |  | 20.7 |
|     | B4DE44 | cDNA FLJ52880, highly similar to Malate dehydrogenase, mitochondrial (EC 1.1.1.37) OS=Homo sapiens PE=2 SV=1 | 129.4<br>8 | 3 | 548 972 1034         |  | 20.7 |

|     |        |                                                                                                                                  |        |   |                  |  |      |
|-----|--------|----------------------------------------------------------------------------------------------------------------------------------|--------|---|------------------|--|------|
| 101 | Q8NC51 | Plasminogen activator inhibitor 1 RNA-binding protein OS=Homo sapiens GN=SERBP1 PE=1 SV=2                                        | 129.10 | 4 | 579 610 689 1180 |  | 8.7  |
|     | Q63HR1 | Putative uncharacterized protein DKFZp686P17171 OS=Homo sapiens GN=DKFZp686P17171 PE=2 SV=1                                      | 129.10 | 4 | 579 610 689 1180 |  | 8.7  |
|     | Q5VU21 | PAI-1 mRNA-binding protein variant OS=Homo sapiens PE=2 SV=1                                                                     | 129.10 | 4 | 579 610 689 1180 |  | 8.7  |
|     | D3DQ70 | SERPINE1 mRNA binding protein 1, isoform CRA_d OS=Homo sapiens GN=SERBP1 PE=2 SV=1                                               | 129.10 | 4 | 579 610 689 1180 |  | 8.7  |
|     | D3DQ69 | SERPINE1 mRNA binding protein 1, isoform CRA_c OS=Homo sapiens GN=SERBP1 PE=2 SV=1                                               | 129.10 | 4 | 579 610 689 1180 |  | 8.7  |
| 102 | Q13185 | Chromobox protein homolog 3 OS=Homo sapiens GN=CBX3 PE=1 SV=4                                                                    | 127.35 | 2 | 614 1193         |  | 14.8 |
|     | A4D177 | Chromobox homolog 3 (HP1 gamma homolog, Drosophila) OS=Homo sapiens GN=CBX3 PE=2 SV=1                                            | 127.35 | 2 | 614 1193         |  | 14.8 |
| 103 | Q6MZS5 | Putative uncharacterized protein DKFZp686A13234 (Fragment) OS=Homo sapiens GN=DKFZp686A13234 PE=2 SV=1                           | 126.76 | 3 | 304 461 518      |  | 6.6  |
|     | Q0VGD6 | HNRPR protein (Fragment) OS=Homo sapiens GN=HNRPR PE=2 SV=1                                                                      | 126.76 | 3 | 304 461 518      |  | 6.6  |
|     | O43390 | Heterogeneous nuclear ribonucleoprotein R OS=Homo sapiens GN=HNRNPR PE=1 SV=1                                                    | 126.76 | 3 | 304 461 518      |  | 6.6  |
|     | B2R7W4 | cDNA, FLJ93632, highly similar to Homo sapiens heterogeneous nuclear ribonucleoprotein R (HNRPR), mRNA OS=Homo sapiens PE=2 SV=1 | 126.76 | 3 | 304 461 518      |  | 6.6  |

**UniProt  
Human  
Protein  
IDs,  
cont.**

| Gr<br>p<br>Nr. | Accession<br>Number | Protein Name                                                                      | Protein<br>Score | Unique<br>PSMs | PSM Serial Nrs. | Other<br>Grp. | %<br>Seq.<br>Covr. |
|----------------|---------------------|-----------------------------------------------------------------------------------|------------------|----------------|-----------------|---------------|--------------------|
| 104            | Q53GD8              | Peptidyl-prolyl cis-trans isomerase (Fragment) OS=Homo sapiens PE=2 SV=1          | 126.54           | 3              | 557 700 1168    |               | 19.6               |
|                | Q00688              | Peptidyl-prolyl cis-trans isomerase FKBP3 OS=Homo sapiens GN=FKBP3 PE=1 SV=1      | 126.54           | 3              | 557 700 1168    |               | 19.6               |
| 105            | P20674              | Cytochrome c oxidase subunit 5A, mitochondrial OS=Homo sapiens GN=COX5A PE=1 SV=2 | 126.49           | 3              | 340 443 483     |               | 36.2               |
|                | H3BV69              | Cytochrome c oxidase subunit 5A, mitochondrial OS=Homo sapiens GN=COX5A PE=2 SV=1 | 126.49           | 3              | 340 443 483     |               | 36.2               |

|     |        |                                                                                                                                                             |            |   |              |  |      |
|-----|--------|-------------------------------------------------------------------------------------------------------------------------------------------------------------|------------|---|--------------|--|------|
|     | H3BRM5 | Cytochrome c oxidase subunit 5A, mitochondrial OS=Homo sapiens GN=COX5A PE=2 SV=1                                                                           | 126.4<br>9 | 3 | 340 443 483  |  | 36.2 |
| 106 | B4DTA2 | cDNA FLJ60148, highly similar to Homo sapiens heterogeneous nuclear ribonucleoprotein D-like (HNRPDL), transcript variant 2, mRNA OS=Homo sapiens PE=2 SV=1 | 125.8<br>6 | 3 | 177 185 629  |  | 10.7 |
| 107 | P02765 | Alpha-2-HS-glycoprotein OS=Homo sapiens GN=AHSG PE=1 SV=1                                                                                                   | 125.4<br>5 | 2 | 106 112      |  | 5.3  |
|     | B7Z8Q2 | cDNA FLJ55606, highly similar to Alpha-2-HS-glycoprotein OS=Homo sapiens PE=2 SV=1                                                                          | 125.4<br>5 | 2 | 106 112      |  | 5.3  |
|     | B7Z556 | cDNA FLJ56822, highly similar to Alpha-2-HS-glycoprotein OS=Homo sapiens PE=2 SV=1                                                                          | 125.4<br>5 | 2 | 106 112      |  | 5.3  |
| 108 | Q59FI9 | Ribosomal protein L12 variant (Fragment) OS=Homo sapiens PE=2 SV=1                                                                                          | 124.8<br>2 | 2 | 830 1181     |  | 33.0 |
|     | P30050 | 60S ribosomal protein L12 OS=Homo sapiens GN=RPL12 PE=1 SV=1                                                                                                | 124.8<br>2 | 2 | 830 1181     |  | 33.0 |
|     | D3DS95 | HCG21173, isoform CRA_a OS=Homo sapiens GN=hCG_21173 PE=2 SV=1                                                                                              | 124.8<br>2 | 2 | 830 1181     |  | 33.0 |
| 109 | Q53T09 | Putative uncharacterized protein XRCC5 (Fragment) OS=Homo sapiens GN=XRCC5 PE=2 SV=1                                                                        | 124.7<br>5 | 3 | 33 122 812   |  | 7.6  |
|     | P13010 | X-ray repair cross-complementing protein 5 OS=Homo sapiens GN=XRCC5 PE=1 SV=3                                                                               | 124.7<br>5 | 3 | 33 122 812   |  | 7.6  |
| 110 | Q02818 | Nucleobindin-1 OS=Homo sapiens GN=NUCB1 PE=1 SV=4                                                                                                           | 124.7<br>4 | 3 | 265 942 984  |  | 8.4  |
|     | B4DZX0 | cDNA FLJ52898, highly similar to Nucleobindin-1 OS=Homo sapiens PE=2 SV=1                                                                                   | 124.7<br>4 | 3 | 265 942 984  |  | 8.4  |
|     | A8K7Q1 | cDNA FLJ77770, highly similar to Homo sapiens nucleobindin 1 (NUCB1), mRNA OS=Homo sapiens PE=2 SV=1                                                        | 124.7<br>4 | 3 | 265 942 984  |  | 8.4  |
| 111 | Q9NYD3 | Prothymosin alpha OS=Homo sapiens GN=PTMA PE=2 SV=1                                                                                                         | 124.6<br>3 | 2 | 67 369       |  | 20.8 |
| 112 | Q9UBR2 | Cathepsin Z OS=Homo sapiens GN=CTSZ PE=1 SV=1                                                                                                               | 124.6<br>0 | 2 | 444 447      |  | 7.3  |
|     | Q5U000 | Cathepsin Z OS=Homo sapiens PE=2 SV=1                                                                                                                       | 124.6<br>0 | 2 | 444 447      |  | 7.3  |
| 113 | P35900 | Keratin, type I cytoskeletal 20 OS=Homo sapiens GN=KRT20 PE=1 SV=1                                                                                          | 123.0<br>0 | 3 | 192 474 1058 |  | 12.7 |
| 114 | Q6NSG7 | High-mobility group nucleosome binding domain 1 OS=Homo sapiens GN=HMGN1 PE=2 SV=1                                                                          | 122.3<br>5 | 2 | 30 327       |  | 35.3 |
|     | P05114 | Non-histone chromosomal protein HMG-14 OS=Homo sapiens GN=HMGN1 PE=1 SV=3                                                                                   | 122.3<br>5 | 2 | 30 327       |  | 35.3 |
|     | A6NEL0 | Non-histone chromosomal protein HMG-14 OS=Homo sapiens GN=HMGN1 PE=2 SV=1                                                                                   | 122.3<br>5 | 2 | 30 327       |  | 35.3 |
| 115 | Q6FI35 | Proliferating cell nuclear antigen OS=Homo sapiens GN=PCNA PE=2 SV=1                                                                                        | 122.2<br>6 | 3 | 27 334 853   |  | 10.3 |
|     | Q6FHF5 | Proliferating cell nuclear antigen (Fragment) OS=Homo sapiens GN=PCNA PE=2 SV=1                                                                             | 122.2<br>6 | 3 | 27 334 853   |  | 10.3 |

|     |        |                                                                                                       |            |   |                |  |      |
|-----|--------|-------------------------------------------------------------------------------------------------------|------------|---|----------------|--|------|
|     | P12004 | Proliferating cell nuclear antigen OS=Homo sapiens<br>GN=PCNA PE=1 SV=1                               | 122.2<br>6 | 3 | 27 334 853     |  | 10.3 |
| 116 | P32119 | Peroxiredoxin-2 OS=Homo sapiens GN=PRDX2 PE=1 SV=5                                                    | 121.9<br>5 | 3 | 368 713 1013   |  | 20.8 |
|     | B4DF70 | cDNA FLJ60461, highly similar to Peroxiredoxin-2 (EC 1.11.1.15) OS=Homo sapiens PE=2 SV=1             | 121.9<br>5 | 3 | 368 713 1013   |  | 20.8 |
| 117 | P51991 | Heterogeneous nuclear ribonucleoprotein A3 OS=Homo sapiens GN=HNRNPA3 PE=1 SV=2                       | 121.5<br>8 | 1 | 939            |  | 8.1  |
|     | E7EWI9 | Heterogeneous nuclear ribonucleoprotein A3 OS=Homo sapiens GN=HNRNPA3 PE=2 SV=1                       | 121.5<br>8 | 1 | 939            |  | 8.1  |
|     | B4E3E6 | cDNA FLJ58832, highly similar to Heterogeneous nuclear ribonucleoprotein A3 OS=Homo sapiens PE=2 SV=1 | 121.5<br>8 | 1 | 939            |  | 8.1  |
|     | B4DDB6 | Heterogeneous nuclear ribonucleoprotein A3, isoform CRA_a OS=Homo sapiens GN=HNRPA3 PE=2 SV=1         | 121.5<br>8 | 1 | 939            |  | 8.1  |
| 118 | P22626 | Heterogeneous nuclear ribonucleoproteins A2/B1 OS=Homo sapiens GN=HNRNPA2B1 PE=1 SV=2                 | 121.5<br>4 | 4 | 14 31 799 1130 |  | 14.2 |
| 119 | P15924 | Desmoplakin OS=Homo sapiens GN=DSP PE=1 SV=3                                                          | 119.5<br>2 | 3 | 533 1040 1194  |  | 2.2  |
| 120 | P02538 | Keratin, type II cytoskeletal 6A OS=Homo sapiens GN=KRT6A PE=1 SV=3                                   | 117.4<br>7 | 2 | 642 681        |  | 13.5 |
|     | B4DRU6 | cDNA FLJ54657, highly similar to Keratin, type II cytoskeletal 6A OS=Homo sapiens PE=2 SV=1           | 117.4<br>7 | 2 | 642 681        |  | 13.5 |
|     | B4DRR0 | cDNA FLJ53910, highly similar to Keratin, type II cytoskeletal 6A OS=Homo sapiens PE=2 SV=1           | 117.4<br>7 | 2 | 642 681        |  | 13.5 |
|     | A8K2I0 | cDNA FLJ78504, highly similar to Homo sapiens keratin 6A (KRT6A), mRNA OS=Homo sapiens PE=2 SV=1      | 117.4<br>7 | 2 | 642 681        |  | 13.5 |
| 121 | B4E177 | cDNA FLJ56368, highly similar to Myosin-14 OS=Homo sapiens PE=2 SV=1                                  | 115.6<br>4 | 3 | 138 528 635    |  | 17.6 |
|     | A1L2Z2 | MYH14 protein OS=Homo sapiens GN=MYH14 PE=2 SV=1                                                      | 115.6<br>4 | 3 | 138 528 635    |  | 61.7 |
| 122 | P01185 | Vasopressin-neurophysin 2-copeptin OS=Homo sapiens GN=AVP PE=1 SV=2                                   | 115.1<br>0 | 3 | 430 903 1094   |  | 12.2 |
| 123 | P07237 | Protein disulfide-isomerase OS=Homo sapiens GN=P4HB PE=1 SV=3                                         | 112.9<br>1 | 3 | 251 255 1085   |  | 5.5  |
|     | B4DNL5 | cDNA FLJ59361, highly similar to Protein disulfide-isomerase (EC 5.3.4.1) OS=Homo sapiens PE=2 SV=1   | 112.9<br>1 | 3 | 251 255 1085   |  | 5.5  |
| 124 | O75475 | PC4 and SFRS1-interacting protein OS=Homo sapiens GN=PSIP1 PE=1 SV=1                                  | 111.9<br>8 | 2 | 137 920        |  | 5.7  |
| 125 | Q53RR5 | Putative uncharacterized protein YWHAQ (Fragment) OS=Homo sapiens GN=YWHAQ PE=2 SV=1                  | 109.4<br>2 | 2 | 53 191         |  | 29.5 |
|     | P27348 | 14-3-3 protein theta OS=Homo sapiens GN=YWHAQ PE=1 SV=1                                               | 109.4<br>2 | 2 | 53 191         |  | 29.5 |
|     | E9PG15 | 14-3-3 protein theta (Fragment) OS=Homo sapiens GN=YWHAQ PE=2 SV=1                                    | 109.4<br>2 | 2 | 53 191         |  | 29.5 |
| 126 | Q53SS8 | Poly(RC) binding protein 1 OS=Homo sapiens GN=PCBP1 PE=2 SV=1                                         | 109.3<br>4 | 2 | 992 1044       |  | 8.7  |

|     |        |                                                                                                                               |            |   |             |  |      |
|-----|--------|-------------------------------------------------------------------------------------------------------------------------------|------------|---|-------------|--|------|
|     | Q15365 | Poly(rC)-binding protein 1 OS=Homo sapiens GN=PCBP1 PE=1 SV=2                                                                 | 109.3<br>4 | 2 | 992 1044    |  | 8.7  |
| 127 | P36955 | Pigment epithelium-derived factor OS=Homo sapiens GN=SERPINF1 PE=1 SV=4                                                       | 108.4<br>6 | 2 | 82 513      |  | 9.1  |
|     | I3L3M1 | Pigment epithelium-derived factor OS=Homo sapiens GN=SERPINF1 PE=2 SV=1                                                       | 108.4<br>6 | 2 | 82 513      |  | 9.1  |
| 128 | Q53FC7 | Heat shock 70kDa protein 6 (HSP70B~) variant (Fragment) OS=Homo sapiens PE=2 SV=1                                             | 105.8<br>7 | 2 | 15 1143     |  | 15.1 |
|     | P17066 | Heat shock 70 kDa protein 6 OS=Homo sapiens GN=HSPA6 PE=1 SV=2                                                                | 105.8<br>7 | 2 | 15 1143     |  | 15.1 |
|     | B3KSM6 | cDNA FLJ36606 fis, clone TRACH2015654, highly similar to HEAT SHOCK 70 kDa PROTEIN 6 OS=Homo sapiens PE=2 SV=1                | 105.8<br>7 | 2 | 15 1143     |  | 15.1 |
|     | B2R6X5 | cDNA, FLJ93166, highly similar to Homo sapiens heat shock 70kDa protein 6 (HSP70B~) (HSPA6), mRNA OS=Homo sapiens PE=2 SV=1   | 105.8<br>7 | 2 | 15 1143     |  | 15.1 |
| 129 | G3V1X9 | Chromobox homolog 5 (HP1 alpha homolog, Drosophila), isoform CRA_a OS=Homo sapiens GN=CBX5 PE=4 SV=1                          | 105.7<br>1 | 2 | 669 1108    |  | 19.2 |
| 130 | P49006 | MARCKS-related protein OS=Homo sapiens GN=MARCKSL1 PE=1 SV=2                                                                  | 105.1<br>5 | 2 | 12 24       |  | 18.5 |
| 131 | Q6IAT9 | Proteasome subunit beta type OS=Homo sapiens GN=PSMB6 PE=2 SV=1                                                               | 104.3<br>6 | 2 | 389 652     |  | 8.4  |
|     | P28072 | Proteasome subunit beta type-6 OS=Homo sapiens GN=PSMB6 PE=1 SV=4                                                             | 104.3<br>6 | 2 | 389 652     |  | 8.4  |
| 132 | Q9UKV3 | Apoptotic chromatin condensation inducer in the nucleus OS=Homo sapiens GN=ACIN1 PE=1 SV=2                                    | 104.2<br>3 | 2 | 141 913     |  | 1.7  |
|     | E7EQT4 | Apoptotic chromatin condensation inducer in the nucleus OS=Homo sapiens GN=ACIN1 PE=2 SV=2                                    | 104.2<br>3 | 2 | 141 913     |  | 1.7  |
|     | B4DQZ7 | cDNA FLJ50838, highly similar to Apoptotic chromatin condensation inducer in the nucleus (Fragment) OS=Homo sapiens PE=2 SV=1 | 104.2<br>3 | 2 | 141 913     |  | 1.7  |
| 133 | Q9Y266 | Nuclear migration protein nudC OS=Homo sapiens GN=NUDC PE=1 SV=1                                                              | 104.2<br>0 | 2 | 592 1053    |  | 6.0  |
| 134 | P00441 | Superoxide dismutase [Cu-Zn] OS=Homo sapiens GN=SOD1 PE=1 SV=2                                                                | 104.0<br>4 | 2 | 743 994     |  | 33.1 |
| 135 | Q8WVW5 | Putative uncharacterized protein (Fragment) OS=Homo sapiens PE=2 SV=1                                                         | 103.8<br>2 | 3 | 88 264 1088 |  | 33.9 |
|     | Q53GK6 | Beta actin variant (Fragment) OS=Homo sapiens PE=2 SV=1                                                                       | 103.8<br>2 | 3 | 88 264 1088 |  | 33.9 |
|     | Q53G99 | Beta actin variant (Fragment) OS=Homo sapiens PE=2 SV=1                                                                       | 103.8<br>2 | 3 | 88 264 1088 |  | 33.9 |
|     | Q53G76 | Beta actin variant (Fragment) OS=Homo sapiens PE=2 SV=1                                                                       | 103.8<br>2 | 3 | 88 264 1088 |  | 33.9 |
|     | Q1KLZ0 | HCG15971, isoform CRA_a OS=Homo sapiens GN=PS1TP5BP1 PE=2 SV=1                                                                | 103.8<br>2 | 3 | 88 264 1088 |  | 33.9 |

|     |        |                                                                                                                                                        |            |   |              |  |      |
|-----|--------|--------------------------------------------------------------------------------------------------------------------------------------------------------|------------|---|--------------|--|------|
|     | P63261 | Actin, cytoplasmic 2 OS=Homo sapiens GN=ACTG1 PE=1 SV=1                                                                                                | 103.8<br>2 | 3 | 88 264 1088  |  | 33.9 |
|     | P60709 | Actin, cytoplasmic 1 OS=Homo sapiens GN=ACTB PE=1 SV=1                                                                                                 | 103.8<br>2 | 3 | 88 264 1088  |  | 33.9 |
|     | B4E3A4 | cDNA FLJ57283, highly similar to Actin, cytoplasmic 2 OS=Homo sapiens PE=2 SV=1                                                                        | 103.8<br>2 | 3 | 88 264 1088  |  | 33.9 |
|     | B4DVQ0 | cDNA FLJ58286, highly similar to Actin, cytoplasmic 2 OS=Homo sapiens PE=2 SV=1                                                                        | 103.8<br>2 | 3 | 88 264 1088  |  | 33.9 |
| 136 | Q99426 | Tubulin-folding cofactor B OS=Homo sapiens GN=TBCB PE=1 SV=2                                                                                           | 102.3<br>8 | 2 | 248 471      |  | 10.4 |
|     | Q6FGY5 | CKAP1 protein OS=Homo sapiens GN=CKAP1 PE=2 SV=1                                                                                                       | 102.3<br>8 | 2 | 248 471      |  | 10.4 |
|     | K7EP07 | Tubulin-folding cofactor B (Fragment) OS=Homo sapiens GN=TBCB PE=4 SV=1                                                                                | 102.3<br>8 | 2 | 248 471      |  | 10.4 |
| 137 | F5GXR3 | Parathymosin OS=Homo sapiens GN=PTMS PE=2 SV=1                                                                                                         | 101.5<br>9 | 2 | 201 1107     |  | 19.2 |
| 138 | Q3ZCU9 | STIP1 protein OS=Homo sapiens GN=STIP1 PE=2 SV=1                                                                                                       | 101.5<br>4 | 2 | 535 971      |  | 12.1 |
|     | P31948 | Stress-induced-phosphoprotein 1 OS=Homo sapiens GN=STIP1 PE=1 SV=1                                                                                     | 101.5<br>4 | 2 | 535 971      |  | 12.1 |
|     | G3XAD8 | Stress-induced-phosphoprotein 1 OS=Homo sapiens GN=STIP1 PE=4 SV=1                                                                                     | 101.5<br>4 | 2 | 535 971      |  | 12.1 |
|     | F5H0T1 | Stress-induced-phosphoprotein 1 OS=Homo sapiens GN=STIP1 PE=2 SV=1                                                                                     | 101.5<br>4 | 2 | 535 971      |  | 12.1 |
|     | A8K690 | cDNA FLJ76863, highly similar to Homo sapiens stress-induced-phosphoprotein 1 (Hsp70/Hsp90-organizing protein) (STIP1), mRNA OS=Homo sapiens PE=2 SV=1 | 101.5<br>4 | 2 | 535 971      |  | 12.1 |
| 139 | P09496 | Clathrin light chain A OS=Homo sapiens GN=CLTA PE=1 SV=1                                                                                               | 101.4<br>7 | 3 | 224 375 785  |  | 10.5 |
| 140 | Q13263 | Transcription intermediary factor 1-beta OS=Homo sapiens GN=TRIM28 PE=1 SV=5                                                                           | 99.16      | 3 | 150 746 1163 |  | 3.5  |
|     | B2R8R5 | cDNA, FLJ94025, highly similar to Homo sapiens tripartite motif-containing 28 (TRIM28), mRNA OS=Homo sapiens PE=2 SV=1                                 | 99.16      | 3 | 150 746 1163 |  | 3.5  |
| 141 | Q6UXA7 | Uncharacterized protein C6orf15 OS=Homo sapiens GN=C6orf15 PE=2 SV=3                                                                                   | 98.37      | 2 | 156 918      |  | 5.8  |
| 142 | P62318 | Small nuclear ribonucleoprotein Sm D3 OS=Homo sapiens GN=SNRPD3 PE=1 SV=1                                                                              | 97.96      | 2 | 578 1005     |  | 10.8 |
|     | B4DJP7 | Small nuclear ribonucleoprotein Sm D3 OS=Homo sapiens GN=SNRPD3 PE=2 SV=1                                                                              | 97.96      | 2 | 578 1005     |  | 10.8 |
| 143 | Q9Y2W2 | WW domain-binding protein 11 OS=Homo sapiens GN=WBP11 PE=1 SV=1                                                                                        | 97.61      | 2 | 200 824      |  | 5.3  |
|     | F5H721 | WW domain-binding protein 11 OS=Homo sapiens GN=WBP11 PE=2 SV=1                                                                                        | 97.61      | 2 | 200 824      |  | 5.3  |
|     | B4DY34 | cDNA FLJ60194, highly similar to WW domain-binding protein 11 OS=Homo sapiens PE=2 SV=1                                                                | 97.61      | 2 | 200 824      |  | 5.3  |



|     |         |                                                                                                                         |       |   |              |  |      |
|-----|---------|-------------------------------------------------------------------------------------------------------------------------|-------|---|--------------|--|------|
|     | B4DMD3  | cDNA FLJ58174, highly similar to WW domain-binding protein 11 OS=Homo sapiens PE=2 SV=1                                 | 97.61 | 2 | 200 824      |  | 5.3  |
| 144 | Q9H307  | Pinin OS=Homo sapiens GN=PNN PE=1 SV=4                                                                                  | 97.43 | 2 | 363 638      |  | 3.9  |
|     | A8K964  | cDNA FLJ75071, highly similar to Homo sapiens pinin, desmosome associated protein (PNN), mRNA OS=Homo sapiens PE=2 SV=1 | 97.43 | 2 | 363 638      |  | 3.9  |
| 145 | Q9NPL4  | Enolase (Fragment) OS=Homo sapiens PE=2 SV=1                                                                            | 97.25 | 1 | 277          |  | 8.8  |
|     | P13929  | Beta-enolase OS=Homo sapiens GN=ENO3 PE=1 SV=5                                                                          | 97.25 | 1 | 277          |  | 8.8  |
|     | D3DTL4  | Enolase OS=Homo sapiens GN=ENO3 PE=2 SV=1                                                                               | 97.25 | 1 | 277          |  | 8.8  |
| 146 | P67936  | Tropomyosin alpha-4 chain OS=Homo sapiens GN=TPM4 PE=1 SV=3                                                             | 97.21 | 3 | 119 977 1023 |  | 30.2 |
| 147 | Q15424  | Scaffold attachment factor B1 OS=Homo sapiens GN=SAFB PE=1 SV=4                                                         | 97.05 | 2 | 900 1182     |  | 4.6  |
|     | F5GZU3  | Scaffold attachment factor B1 OS=Homo sapiens GN=SAFB PE=2 SV=1                                                         | 97.05 | 2 | 900 1182     |  | 4.6  |
|     | B7ZLP6  | SAFB protein OS=Homo sapiens GN=SAFB PE=2 SV=1                                                                          | 97.05 | 2 | 900 1182     |  | 4.6  |
|     | B7ZLP5  | SAFB protein OS=Homo sapiens GN=SAFB PE=2 SV=1                                                                          | 97.05 | 2 | 900 1182     |  | 4.6  |
|     | B7Z5X3  | cDNA FLJ59404, highly similar to Scaffold attachment factor B OS=Homo sapiens PE=2 SV=1                                 | 97.05 | 2 | 900 1182     |  | 4.6  |
|     | B7Z2Z1  | cDNA FLJ59523, highly similar to Scaffold attachment factor B OS=Homo sapiens PE=2 SV=1                                 | 97.05 | 2 | 900 1182     |  | 4.6  |
|     | B7Z2F6  | Scaffold attachment factor B1 OS=Homo sapiens GN=SAFB PE=2 SV=1                                                         | 97.05 | 2 | 900 1182     |  | 4.6  |
|     | B7Z1C7  | cDNA FLJ59451, highly similar to Scaffold attachment factor B OS=Homo sapiens PE=2 SV=1                                 | 97.05 | 2 | 900 1182     |  | 4.6  |
|     | A8K329  | cDNA FLJ76656, highly similar to Homo sapiens scaffold attachment factor B (SAFB), mRNA OS=Homo sapiens PE=2 SV=1       | 97.05 | 2 | 900 1182     |  | 4.6  |
|     | A0AV56  | SAFB protein OS=Homo sapiens GN=SAFB PE=2 SV=1                                                                          | 97.05 | 2 | 900 1182     |  | 4.6  |
| 148 | P62851  | 40S ribosomal protein S25 OS=Homo sapiens GN=RPS25 PE=1 SV=1                                                            | 96.45 | 2 | 278 1140     |  | 12.8 |
| 149 | Q6FGH5  | 40S ribosomal protein S21 (Fragment) OS=Homo sapiens GN=RPS21 PE=2 SV=1                                                 | 96.01 | 2 | 86 446       |  | 26.5 |
|     | P63220  | 40S ribosomal protein S21 OS=Homo sapiens GN=RPS21 PE=1 SV=1                                                            | 96.01 | 2 | 86 446       |  | 26.5 |
| 150 | Q01469  | Fatty acid-binding protein, epidermal OS=Homo sapiens GN=FABP5 PE=1 SV=3                                                | 95.35 | 2 | 357 364      |  | 25.2 |
|     | E7D VW5 | Fatty acid binding protein 5 (Psoriasis-associated) OS=Homo sapiens GN=FABP5 PE=2 SV=1                                  | 95.35 | 2 | 357 364      |  | 25.2 |



**UniProt  
Human  
Protein  
IDs,  
cont.**

| Gr<br>p<br>Nr. | Accessio<br>n<br>Number | Protein Name                                                                                                                                                     | Prote<br>in<br>Scor<br>e | Uniqu<br>e<br>PSMs | PSM Serial Nrs. | Oth<br>er<br>Grp. | %<br>Seq.<br>Cove<br>r. |
|----------------|-------------------------|------------------------------------------------------------------------------------------------------------------------------------------------------------------|--------------------------|--------------------|-----------------|-------------------|-------------------------|
| 151            | Q53HJ4                  | Minichromosome maintenance protein 3 variant (Fragment)<br>OS=Homo sapiens PE=2 SV=1                                                                             | 95.10                    | 3                  | 462 1064 1161   |                   | 4.1                     |
|                | P25205                  | DNA replication licensing factor MCM3 OS=Homo sapiens<br>GN=MCM3 PE=1 SV=3                                                                                       | 95.10                    | 3                  | 462 1064 1161   |                   | 4.1                     |
|                | J3KQ69                  | DNA replication licensing factor MCM3 OS=Homo sapiens<br>GN=MCM3 PE=3 SV=1                                                                                       | 95.10                    | 3                  | 462 1064 1161   |                   | 4.1                     |
|                | B4DWW4                  | DNA replication licensing factor MCM3 OS=Homo sapiens<br>GN=MCM3 PE=2 SV=1                                                                                       | 95.10                    | 3                  | 462 1064 1161   |                   | 4.1                     |
|                | B4DUQ9                  | cDNA FLJ50873, highly similar to DNA replication licensing<br>factor MCM3 OS=Homo sapiens PE=2 SV=1                                                              | 95.10                    | 3                  | 462 1064 1161   |                   | 4.1                     |
|                | B4DS46                  | cDNA FLJ55751, highly similar to DNA replication licensing<br>factor MCM3 OS=Homo sapiens PE=2 SV=1                                                              | 95.10                    | 3                  | 462 1064 1161   |                   | 4.1                     |
|                | B2R7C5                  | cDNA, FLJ93378, highly similar to Homo sapiens MCM3<br>minichromosome maintenance deficient 3 ( <i>S. cerevisiae</i> )<br>(MCM3), mRNA OS=Homo sapiens PE=2 SV=1 | 95.10                    | 3                  | 462 1064 1161   |                   | 4.1                     |
| 152            | Q59FV9                  | PTK7 protein tyrosine kinase 7 isoform a variant (Fragment)<br>OS=Homo sapiens PE=2 SV=1                                                                         | 94.17                    | 2                  | 572 1002        |                   | 3.6                     |
|                | Q13308                  | Inactive tyrosine-protein kinase 7 OS=Homo sapiens<br>GN=PTK7 PE=1 SV=2                                                                                          | 94.17                    | 2                  | 572 1002        |                   | 3.6                     |
| 153            | Q6FI03                  | G3BP protein OS=Homo sapiens GN=G3BP PE=2 SV=1                                                                                                                   | 93.77                    | 2                  | 147 1084        |                   | 9.4                     |
|                | Q5U0Q1                  | Putative uncharacterized protein DKFZp686L1159 OS=Homo<br>sapiens GN=DKFZp686L1159 PE=2 SV=1                                                                     | 93.77                    | 2                  | 147 1084        |                   | 9.4                     |
|                | Q32P45                  | GTPase activating protein (SH3 domain) binding protein 1<br>OS=Homo sapiens GN=G3BP1 PE=2 SV=1                                                                   | 93.77                    | 2                  | 147 1084        |                   | 9.4                     |
|                | Q13283                  | Ras GTPase-activating protein-binding protein 1 OS=Homo<br>sapiens GN=G3BP1 PE=1 SV=1                                                                            | 93.77                    | 2                  | 147 1084        |                   | 9.4                     |
| 154            | P24752                  | Acetyl-CoA acetyltransferase, mitochondrial OS=Homo<br>sapiens GN=ACAT1 PE=1 SV=1                                                                                | 93.73                    | 1                  | 435             |                   | 3.0                     |
| 155            | P33176                  | Kinesin-1 heavy chain OS=Homo sapiens GN=KIF5B PE=1<br>SV=1                                                                                                      | 93.47                    | 1                  | 735             |                   | 1.2                     |
|                | D3DRX6                  | Kinesin family member 5B, isoform CRA_a OS=Homo sapiens<br>GN=KIF5B PE=3 SV=1                                                                                    | 93.47                    | 1                  | 735             |                   | 1.2                     |
|                | C1PHA2                  | Tyrosine-protein kinase receptor OS=Homo sapiens<br>GN=KIF5B-ALK PE=2 SV=1                                                                                       | 93.47                    | 1                  | 735             |                   | 1.2                     |

|     |        |                                                                                                                           |       |   |              |  |      |
|-----|--------|---------------------------------------------------------------------------------------------------------------------------|-------|---|--------------|--|------|
|     | A8K048 | cDNA FLJ76989, highly similar to Homo sapiens kinesin family member 5B (KIF5B), mRNA (Fragment) OS=Homo sapiens PE=2 SV=1 | 93.47 | 1 | 735          |  | 1.2  |
| 156 | Q567R9 | CIP29 protein OS=Homo sapiens GN=CIP29 PE=2 SV=1                                                                          | 93.30 | 2 | 294 947      |  | 5.5  |
|     | P82979 | SAP domain-containing ribonucleoprotein OS=Homo sapiens GN=SARNP PE=1 SV=3                                                | 93.30 | 2 | 294 947      |  | 5.5  |
|     | H0YHG0 | Uncharacterized protein (Fragment) OS=Homo sapiens PE=4 SV=1                                                              | 93.30 | 2 | 294 947      |  | 5.5  |
| 157 | Q5JQ13 | Vinculin (Fragment) OS=Homo sapiens GN=VCL PE=2 SV=1                                                                      | 92.77 | 2 | 464 1110     |  | 2.4  |
|     | P18206 | Vinculin OS=Homo sapiens GN=VCL PE=1 SV=4                                                                                 | 92.77 | 2 | 464 1110     |  | 2.4  |
|     | B4E3Q9 | cDNA FLJ59659, highly similar to Vinculin OS=Homo sapiens PE=2 SV=1                                                       | 92.77 | 2 | 464 1110     |  | 2.4  |
|     | B3KXA2 | cDNA FLJ45031 fis, clone BRAWH3018548, highly similar to Vinculin OS=Homo sapiens PE=2 SV=1                               | 92.77 | 2 | 464 1110     |  | 2.4  |
| 158 | Q9Y4K0 | Lysyl oxidase homolog 2 OS=Homo sapiens GN=LOXL2 PE=1 SV=1                                                                | 92.65 | 3 | 428 884 1095 |  | 9.8  |
| 159 | P02751 | Fibronectin OS=Homo sapiens GN=FN1 PE=1 SV=4                                                                              | 91.89 | 3 | 103 230 847  |  | 1.3  |
|     | F8W7G7 | Ugl-Y3 OS=Homo sapiens GN=FN1 PE=2 SV=1                                                                                   | 91.89 | 3 | 103 230 847  |  | 1.3  |
|     | E9PE77 | Ugl-Y3 OS=Homo sapiens GN=FN1 PE=2 SV=1                                                                                   | 91.89 | 3 | 103 230 847  |  | 1.3  |
|     | B7ZLF0 | Fibronectin 1 OS=Homo sapiens GN=FN1 PE=2 SV=1                                                                            | 91.89 | 3 | 103 230 847  |  | 1.3  |
|     | B7ZLE5 | FN1 protein OS=Homo sapiens GN=FN1 PE=2 SV=1                                                                              | 91.89 | 3 | 103 230 847  |  | 1.3  |
| 160 | P35080 | Profilin-2 OS=Homo sapiens GN=PFN2 PE=1 SV=3                                                                              | 91.86 | 1 | 1171         |  | 4.2  |
|     | G5E9Q6 | Profilin OS=Homo sapiens GN=PFN2 PE=3 SV=1                                                                                | 91.86 | 1 | 1171         |  | 4.2  |
|     | D3DNI3 | Profilin (Fragment) OS=Homo sapiens GN=PFN2 PE=2 SV=1                                                                     | 91.86 | 1 | 1171         |  | 4.2  |
|     | D3DNI2 | Profilin (Fragment) OS=Homo sapiens GN=PFN2 PE=2 SV=1                                                                     | 91.86 | 1 | 1171         |  | 4.2  |
|     | C9JQ45 | Profilin OS=Homo sapiens GN=PFN2 PE=2 SV=1                                                                                | 91.86 | 1 | 1171         |  | 4.2  |
|     | C9J712 | Profilin-2 OS=Homo sapiens GN=PFN2 PE=4 SV=1                                                                              | 91.86 | 1 | 1171         |  | 4.2  |
|     | C9J0J7 | Profilin-2 OS=Homo sapiens GN=PFN2 PE=4 SV=1                                                                              | 91.86 | 1 | 1171         |  | 4.2  |
|     | B4DNH1 | Profilin OS=Homo sapiens PE=2 SV=1                                                                                        | 91.86 | 1 | 1171         |  | 4.2  |
| 161 | Q59GB4 | Dihydropyrimidinase-like 2 variant (Fragment) OS=Homo sapiens PE=2 SV=1                                                   | 91.49 | 2 | 541 581      |  | 3.1  |
|     | Q53ET2 | Dihydropyrimidinase-like 2 variant (Fragment) OS=Homo sapiens PE=2 SV=1                                                   | 91.49 | 2 | 541 581      |  | 3.1  |
|     | Q16555 | Dihydropyrimidinase-related protein 2 OS=Homo sapiens GN=DPYSL2 PE=1 SV=1                                                 | 91.49 | 2 | 541 581      |  | 3.1  |
| 162 | P30049 | ATP synthase subunit delta, mitochondrial OS=Homo sapiens GN=ATP5D PE=1 SV=2                                              | 91.40 | 2 | 172 1000     |  | 8.9  |
| 163 | Q5SYQ9 | Retinal dehydrogenase 1 OS=Homo sapiens GN=ALDH1A1 PE=2 SV=1                                                              | 91.38 | 2 | 13 1184      |  | 10.8 |
|     | Q5SYQ8 | Retinal dehydrogenase 1 (Fragment) OS=Homo sapiens GN=ALDH1A1 PE=2 SV=1                                                   | 91.38 | 2 | 13 1184      |  | 10.8 |
|     | Q5SYQ7 | Retinal dehydrogenase 1 (Fragment) OS=Homo sapiens GN=ALDH1A1 PE=2 SV=1                                                   | 91.38 | 2 | 13 1184      |  | 10.8 |

|     |        |                                                                                                                                                         |       |   |          |  |      |
|-----|--------|---------------------------------------------------------------------------------------------------------------------------------------------------------|-------|---|----------|--|------|
|     | Q59EJ0 | Aldehyde dehydrogenase 1A1 variant (Fragment) OS=Homo sapiens PE=2 SV=1                                                                                 | 91.38 | 2 | 13 1184  |  | 10.8 |
|     | P00352 | Retinal dehydrogenase 1 OS=Homo sapiens GN=ALDH1A1 PE=1 SV=2                                                                                            | 91.38 | 2 | 13 1184  |  | 10.8 |
| 164 | Q8N1G4 | Leucine-rich repeat-containing protein 47 OS=Homo sapiens GN=LRRC47 PE=1 SV=1                                                                           | 91.37 | 1 | 214      |  | 2.6  |
| 165 | Q68CM6 | STXBP1 protein OS=Homo sapiens GN=stxbp1 PE=2 SV=1                                                                                                      | 91.02 | 1 | 733      |  | 2.3  |
|     | Q59GC9 | Syntaxin binding protein 1 variant (Fragment) OS=Homo sapiens PE=2 SV=1                                                                                 | 91.02 | 1 | 733      |  | 2.3  |
|     | P61764 | Syntaxin-binding protein 1 OS=Homo sapiens GN=STXBP1 PE=1 SV=1                                                                                          | 91.02 | 1 | 733      |  | 2.3  |
|     | B7Z3F4 | cDNA FLJ55070, highly similar to Syntaxin-binding protein 1 OS=Homo sapiens PE=2 SV=1                                                                   | 91.02 | 1 | 733      |  | 2.3  |
|     | B7Z2V7 | cDNA FLJ54602, highly similar to Syntaxin-binding protein 1 OS=Homo sapiens PE=2 SV=1                                                                   | 91.02 | 1 | 733      |  | 2.3  |
|     | B7Z1V5 | cDNA FLJ55678, highly similar to Syntaxin-binding protein 1 OS=Homo sapiens PE=2 SV=1                                                                   | 91.02 | 1 | 733      |  | 2.3  |
| 166 | Q7Z4W8 | Heparin-binding protein HBp15 OS=Homo sapiens PE=2 SV=1                                                                                                 | 90.37 | 2 | 199 379  |  | 28.1 |
|     | P35268 | 60S ribosomal protein L22 OS=Homo sapiens GN=RPL22 PE=1 SV=2                                                                                            | 90.37 | 2 | 199 379  |  | 28.1 |
|     | K7ER17 | 60S ribosomal protein L22 OS=Homo sapiens GN=RPL22 PE=4 SV=1                                                                                            | 90.37 | 2 | 199 379  |  | 28.1 |
|     | K7EMH1 | 60S ribosomal protein L22 (Fragment) OS=Homo sapiens GN=RPL22 PE=4 SV=1                                                                                 | 90.37 | 2 | 199 379  |  | 28.1 |
| 167 | Q6ZP45 | CDNA FLJ26517 fis, clone KDN07769 OS=Homo sapiens PE=2 SV=1                                                                                             | 89.85 | 1 | 207      |  | 15.6 |
|     | Q5T6U8 | High mobility group AT-hook 1 OS=Homo sapiens GN=HMGA1 PE=4 SV=1                                                                                        | 89.85 | 1 | 207      |  | 15.6 |
|     | P17096 | High mobility group protein HMG-I/HMG-Y OS=Homo sapiens GN=HMGA1 PE=1 SV=3                                                                              | 89.85 | 1 | 207      |  | 15.6 |
| 168 | Q8WVB5 | Metallothionein OS=Homo sapiens GN=MT1X PE=2 SV=1                                                                                                       | 89.76 | 2 | 98 838   |  | 49.2 |
|     | P80297 | Metallothionein-1X OS=Homo sapiens GN=MT1X PE=1 SV=1                                                                                                    | 89.76 | 2 | 98 838   |  | 49.2 |
| 169 | Q12906 | Interleukin enhancer-binding factor 3 OS=Homo sapiens GN=ILF3 PE=1 SV=3                                                                                 | 88.71 | 2 | 158 1109 |  | 5.8  |
|     | G5E9M5 | Interleukin enhancer binding factor 3, 90kDa, isoform CRA_b OS=Homo sapiens GN=ILF3 PE=4 SV=1                                                           | 88.71 | 2 | 158 1109 |  | 5.8  |
|     | F4ZW66 | NF110b OS=Homo sapiens PE=2 SV=1                                                                                                                        | 88.71 | 2 | 158 1109 |  | 5.8  |
|     | F4ZW65 | NF90b OS=Homo sapiens PE=2 SV=1                                                                                                                         | 88.71 | 2 | 158 1109 |  | 5.8  |
|     | F4ZW64 | NF90a OS=Homo sapiens PE=2 SV=1                                                                                                                         | 88.71 | 2 | 158 1109 |  | 5.8  |
|     | A8K590 | cDNA FLJ77456, highly similar to Homo sapiens interleukin enhancer binding factor 3, 90kDa (ILF3), transcript variant 2, mRNA OS=Homo sapiens PE=2 SV=1 | 88.71 | 2 | 158 1109 |  | 5.8  |
| 170 | Q59EQ2 | Tyrosine 3-monooxygenase/tryptophan 5-monooxygenase activation protein, beta polypeptide variant (Fragment) OS=Homo sapiens PE=2 SV=1                   | 88.53 | 2 | 604 627  |  | 44.0 |

|     |        |                                                                                                                                      |       |   |             |  |      |
|-----|--------|--------------------------------------------------------------------------------------------------------------------------------------|-------|---|-------------|--|------|
|     | Q4VY20 | 14-3-3 protein beta/alpha (Fragment) OS=Homo sapiens<br>GN=YWHAB PE=4 SV=1                                                           | 88.53 | 2 | 604 627     |  | 44.0 |
|     | Q4VY19 | 14-3-3 protein beta/alpha (Fragment) OS=Homo sapiens<br>GN=YWHAB PE=4 SV=1                                                           | 88.53 | 2 | 604 627     |  | 44.0 |
|     | P31946 | 14-3-3 protein beta/alpha OS=Homo sapiens GN=YWHAB<br>PE=1 SV=3                                                                      | 88.53 | 2 | 604 627     |  | 44.0 |
|     | B5BU24 | 14-3-3 protein beta/alpha OS=Homo sapiens GN=YWHAB<br>PE=2 SV=1                                                                      | 88.53 | 2 | 604 627     |  | 44.0 |
| 171 | Q16778 | Histone H2B type 2-E OS=Homo sapiens GN=HIST2H2BE<br>PE=1 SV=3                                                                       | 88.04 | 2 | 395 740     |  | 61.1 |
| 172 | Q53G71 | Calreticulin variant (Fragment) OS=Homo sapiens PE=2 SV=1                                                                            | 87.97 | 3 | 90 215 436  |  | 15.4 |
|     | P27797 | Calreticulin OS=Homo sapiens GN=CALR PE=1 SV=1                                                                                       | 87.97 | 3 | 90 215 436  |  | 15.4 |
|     | K7EJB9 | Calreticulin (Fragment) OS=Homo sapiens GN=CALR PE=3<br>SV=1                                                                         | 87.97 | 3 | 90 215 436  |  | 15.4 |
| 173 | Q5RKT7 | Ribosomal protein S27a OS=Homo sapiens GN=RPS27A<br>PE=2 SV=1                                                                        | 87.30 | 3 | 301 407 729 |  | 30.1 |
|     | P62979 | Ubiquitin-40S ribosomal protein S27a OS=Homo sapiens<br>GN=RPS27A PE=1 SV=2                                                          | 87.30 | 3 | 301 407 729 |  | 30.1 |
|     | B2RDW1 | Ribosomal protein S27a, isoform CRA_c OS=Homo sapiens<br>GN=RPS27A PE=2 SV=1                                                         | 87.30 | 3 | 301 407 729 |  | 30.1 |
| 174 | Q86X29 | Lipolysis-stimulated lipoprotein receptor OS=Homo sapiens<br>GN=LSR PE=1 SV=4                                                        | 86.85 | 1 | 663         |  | 2.8  |
|     | A6NDW3 | Lipolysis-stimulated lipoprotein receptor OS=Homo sapiens<br>GN=LSR PE=2 SV=1                                                        | 86.85 | 1 | 663         |  | 2.8  |
| 175 | Q6IB64 | TCEA2 protein OS=Homo sapiens GN=TCEA2 PE=2 SV=1                                                                                     | 86.60 | 1 | 890         |  | 11.1 |
|     | Q15560 | Transcription elongation factor A protein 2 OS=Homo sapiens<br>GN=TCEA2 PE=1 SV=1                                                    | 86.60 | 1 | 890         |  | 11.1 |
|     | B3KNM1 | cDNA FLJ14918 fis, clone PLACE1007239, highly similar to<br>Transcription elongation factor A protein 2 OS=Homo sapiens<br>PE=2 SV=1 | 86.60 | 1 | 890         |  | 45.1 |
| 176 | Q9NRX4 | 14 kDa phosphohistidine phosphatase OS=Homo sapiens<br>GN=PHPT1 PE=1 SV=1                                                            | 85.73 | 1 | 1067        |  | 9.6  |
|     | Q6FIE5 | PHP14 protein OS=Homo sapiens GN=PHP14 PE=2 SV=1                                                                                     | 85.73 | 1 | 1067        |  | 9.6  |
| 177 | P31431 | Syndecan-4 OS=Homo sapiens GN=SDC4 PE=1 SV=2                                                                                         | 85.32 | 2 | 497 1061    |  | 17.5 |
|     | B4E1S6 | Syndecan OS=Homo sapiens GN=SDC4 PE=2 SV=1                                                                                           | 85.32 | 2 | 497 1061    |  | 17.5 |
| 178 | Q76LA1 | CSTB protein OS=Homo sapiens GN=CSTB PE=2 SV=1                                                                                       | 84.93 | 2 | 235 1202    |  | 30.6 |
|     | P04080 | Cystatin-B OS=Homo sapiens GN=CSTB PE=1 SV=2                                                                                         | 84.93 | 2 | 235 1202    |  | 30.6 |
| 179 | P07954 | Fumarate hydratase, mitochondrial OS=Homo sapiens<br>GN=FH PE=1 SV=3                                                                 | 84.88 | 1 | 530         |  | 2.7  |
|     | B1ANK7 | Fumarate hydratase OS=Homo sapiens GN=FH PE=2 SV=1                                                                                   | 84.88 | 1 | 530         |  | 2.7  |
| 180 | P30041 | Peroxiredoxin-6 OS=Homo sapiens GN=PRDX6 PE=1 SV=3                                                                                   | 84.37 | 2 | 551 1201    |  | 8.9  |
| 181 | D3DND1 | CDV3 homolog (Mouse), isoform CRA_a OS=Homo sapiens<br>GN=CDV3 PE=4 SV=1                                                             | 83.49 | 3 | 101 229 919 |  | 10.5 |
| 182 | Q7Z2W4 | Zinc finger CCCH-type antiviral protein 1 OS=Homo sapiens<br>GN=ZC3HAV1 PE=1 SV=3                                                    | 83.47 | 1 | 679         |  | 3.4  |

|     |        |                                                                                                                                                        |       |   |              |  |      |
|-----|--------|--------------------------------------------------------------------------------------------------------------------------------------------------------|-------|---|--------------|--|------|
|     | Q05DV5 | ZC3HAV1 protein (Fragment) OS=Homo sapiens<br>GN=ZC3HAV1 PE=2 SV=1                                                                                     | 83.47 | 1 | 679          |  | 3.4  |
|     | C9J6P4 | Zinc finger CCCH-type antiviral protein 1 OS=Homo sapiens<br>GN=ZC3HAV1 PE=2 SV=1                                                                      | 83.47 | 1 | 679          |  | 3.4  |
|     | A8K9U6 | cDNA FLJ76121, highly similar to Homo sapiens zinc finger<br>CCCH-type, antiviral 1 (ZC3HAV1), transcript variant 1,<br>mRNA OS=Homo sapiens PE=2 SV=1 | 83.47 | 1 | 679          |  | 3.4  |
| 183 | Q06830 | Peroxiredoxin-1 OS=Homo sapiens GN=PRDX1 PE=1 SV=1                                                                                                     | 82.57 | 3 | 163 337 547  |  | 24.6 |
|     | B2R4P2 | cDNA, FLJ92164, highly similar to Homo sapiens<br>peroxiredoxin 1 (PRDX1), mRNA OS=Homo sapiens PE=2<br>SV=1                                           | 82.57 | 3 | 163 337 547  |  | 24.6 |
| 184 | P01034 | Cystatin-C OS=Homo sapiens GN=CST3 PE=1 SV=1                                                                                                           | 81.75 | 2 | 821 936      |  | 19.9 |
| 185 | Q5VXV3 | SET OS=Homo sapiens GN=SET PE=2 SV=1                                                                                                                   | 81.69 | 2 | 1111 1175    |  | 11.6 |
|     | Q5VXV2 | Protein SET OS=Homo sapiens GN=SET PE=2 SV=2                                                                                                           | 81.69 | 2 | 1111 1175    |  | 11.6 |
|     | Q01105 | Protein SET OS=Homo sapiens GN=SET PE=1 SV=3                                                                                                           | 81.69 | 2 | 1111 1175    |  | 11.6 |
|     | B2RCX0 | cDNA, FLJ96345, Homo sapiens SET translocation (myeloid<br>leukemia-associated) (SET),mRNA OS=Homo sapiens PE=2<br>SV=1                                | 81.69 | 2 | 1111 1175    |  | 11.6 |
| 186 | P14314 | Glucosidase 2 subunit beta OS=Homo sapiens GN=PRKCSH<br>PE=1 SV=2                                                                                      | 80.98 | 3 | 182 540 1052 |  | 25.4 |
|     | K7ELL7 | Glucosidase 2 subunit beta OS=Homo sapiens GN=PRKCSH<br>PE=4 SV=1                                                                                      | 80.98 | 3 | 182 540 1052 |  | 25.4 |
|     | B4DJQ5 | cDNA FLJ59211, highly similar to Glucosidase 2 subunit beta<br>OS=Homo sapiens PE=2 SV=1                                                               | 80.98 | 3 | 182 540 1052 |  | 25.4 |
|     | A2VCQ4 | PRKCSH protein (Fragment) OS=Homo sapiens GN=PRKCSH<br>PE=2 SV=1                                                                                       | 80.98 | 3 | 182 540 1052 |  | 25.4 |
| 187 | O14737 | Programmed cell death protein 5 OS=Homo sapiens<br>GN=PDCD5 PE=1 SV=3                                                                                  | 80.91 | 1 | 806          |  | 10.1 |
|     | K7ESJ4 | Programmed cell death protein 5 OS=Homo sapiens<br>GN=PDCD5 PE=4 SV=1                                                                                  | 80.91 | 1 | 806          |  | 10.1 |
|     | K7EQA1 | Programmed cell death protein 5 OS=Homo sapiens<br>GN=PDCD5 PE=4 SV=1                                                                                  | 80.91 | 1 | 806          |  | 10.1 |
|     | K7EL31 | Programmed cell death protein 5 OS=Homo sapiens<br>GN=PDCD5 PE=4 SV=1                                                                                  | 80.91 | 1 | 806          |  | 10.1 |
|     | B4DE64 | Programmed cell death protein 5 OS=Homo sapiens<br>GN=PDCD5 PE=2 SV=1                                                                                  | 80.91 | 1 | 806          |  | 10.1 |

**UniProt  
Human  
Protein  
IDs,  
cont.**

| Gr<br>p<br>Nr. | Accessio<br>n<br>Number | Protein Name                                                                                   | Prote<br>in<br>Scor<br>e | Uniqu<br>e<br>PSMs | PSM Serial Nrs. | Oth<br>er<br>Grp. | %<br>Seq.<br>Cove<br>r. |
|----------------|-------------------------|------------------------------------------------------------------------------------------------|--------------------------|--------------------|-----------------|-------------------|-------------------------|
| 188            | Q9BW30                  | Tubulin polymerization-promoting protein family member 3<br>OS=Homo sapiens GN=TPPP3 PE=1 SV=1 | 79.40                    | 2                  | 697 714         |                   | 19.9                    |
| 189            | Q9UHD8                  | Septin-9 OS=Homo sapiens GN=SEPT9 PE=1 SV=2                                                    | 79.39                    | 2                  | 308 989         |                   | 5.8                     |
| 190            | P30040                  | Endoplasmic reticulum resident protein 29 OS=Homo sapiens<br>GN=ERP29 PE=1 SV=4                | 78.96                    | 2                  | 466 978         |                   | 10.6                    |
|                | F8VY02                  | Endoplasmic reticulum resident protein 29 OS=Homo sapiens<br>GN=ERP29 PE=2 SV=1                | 78.96                    | 2                  | 466 978         |                   | 10.6                    |
| 191            | Q15818                  | Neuronal pentraxin-1 OS=Homo sapiens GN=NPTX1 PE=2<br>SV=2                                     | 78.79                    | 1                  | 1083            |                   | 3.5                     |
| 192            | G5E9L5                  | DEAD (Asp-Glu-Ala-Asp) box polypeptide 17, isoform CRA_a<br>OS=Homo sapiens GN=DDX17 PE=4 SV=1 | 78.55                    | 1                  | 232             |                   | 13.8                    |
| 193            | Q8N1C8                  | HSPA9 protein (Fragment) OS=Homo sapiens GN=HSPA9<br>PE=2 SV=1                                 | 77.03                    | 1                  | 917             |                   | 5.7                     |
|                | P38646                  | Stress-70 protein, mitochondrial OS=Homo sapiens<br>GN=HSPA9 PE=1 SV=2                         | 77.03                    | 1                  | 917             |                   | 5.7                     |
|                | D6RJI2                  | Stress-70 protein, mitochondrial (Fragment) OS=Homo<br>sapiens GN=HSPA9 PE=2 SV=1              | 77.03                    | 1                  | 917             |                   | 5.7                     |
|                | D6RA73                  | Stress-70 protein, mitochondrial (Fragment) OS=Homo<br>sapiens GN=HSPA9 PE=2 SV=1              | 77.03                    | 1                  | 917             |                   | 5.7                     |
|                | B7Z4V2                  | cDNA FLJ51907, highly similar to Stress-70 protein,<br>mitochondrial OS=Homo sapiens PE=2 SV=1 | 77.03                    | 1                  | 917             |                   | 5.7                     |
|                | B7Z1V7                  | cDNA FLJ51811, highly similar to Stress-70 protein,<br>mitochondrial OS=Homo sapiens PE=2 SV=1 | 77.03                    | 1                  | 917             |                   | 5.7                     |
| 194            | C9JNW5                  | 60S ribosomal protein L24 OS=Homo sapiens GN=RPL24<br>PE=4 SV=1                                | 76.63                    | 2                  | 7 341           |                   | 24.0                    |
| 195            | Q5HYI3                  | Putative uncharacterized protein DKFZp686N1815 OS=Homo<br>sapiens GN=DKFZp686N1815 PE=2 SV=1   | 76.35                    | 1                  | 1037            |                   | 7.0                     |
|                | P42574                  | Caspase-3 OS=Homo sapiens GN=CASP3 PE=1 SV=2                                                   | 76.35                    | 1                  | 1037            |                   | 7.0                     |
|                | C9JXR7                  | Caspase-3 subunit p12 (Fragment) OS=Homo sapiens<br>GN=CASP3 PE=2 SV=2                         | 76.35                    | 1                  | 1037            |                   | 7.0                     |
|                | A8MVM1                  | Caspase-3 subunit p12 OS=Homo sapiens GN=CASP3 PE=4<br>SV=2                                    | 76.35                    | 1                  | 1037            |                   | 7.0                     |
| 196            | Q9BTM1                  | Histone H2A.J OS=Homo sapiens GN=H2AFJ PE=1 SV=1                                               | 75.80                    | 2                  | 648 1070        |                   | 22.3                    |
|                | Q99878                  | Histone H2A type 1-J OS=Homo sapiens GN=HIST1H2AJ<br>PE=1 SV=3                                 | 75.80                    | 2                  | 648 1070        |                   | 22.3                    |
|                | Q96KK5                  | Histone H2A type 1-H OS=Homo sapiens GN=HIST1H2AH<br>PE=1 SV=3                                 | 75.80                    | 2                  | 648 1070        |                   | 22.3                    |
|                | Q93077                  | Histone H2A type 1-C OS=Homo sapiens GN=HIST1H2AC<br>PE=1 SV=3                                 | 75.80                    | 2                  | 648 1070        |                   | 22.3                    |
|                | Q7L7L0                  | Histone H2A type 3 OS=Homo sapiens GN=HIST3H2A PE=1<br>SV=3                                    | 75.80                    | 2                  | 648 1070        |                   | 22.3                    |

|     |        |                                                                                                               |       |   |          |  |      |
|-----|--------|---------------------------------------------------------------------------------------------------------------|-------|---|----------|--|------|
|     | Q6F113 | Histone H2A type 2-A OS=Homo sapiens GN=HIST2H2AA3 PE=1 SV=3                                                  | 75.80 | 2 | 648 1070 |  | 22.3 |
|     | Q16777 | Histone H2A type 2-C OS=Homo sapiens GN=HIST2H2AC PE=1 SV=4                                                   | 75.80 | 2 | 648 1070 |  | 22.3 |
|     | Q08AJ9 | Histone H2A OS=Homo sapiens GN=HIST1H2AB PE=2 SV=1                                                            | 75.80 | 2 | 648 1070 |  | 22.3 |
|     | P20671 | Histone H2A type 1-D OS=Homo sapiens GN=HIST1H2AD PE=1 SV=2                                                   | 75.80 | 2 | 648 1070 |  | 22.3 |
|     | P16104 | Histone H2A.x OS=Homo sapiens GN=H2AFX PE=1 SV=2                                                              | 75.80 | 2 | 648 1070 |  | 22.3 |
| 197 | P19012 | Keratin, type I cytoskeletal 15 OS=Homo sapiens GN=KRT15 PE=1 SV=3                                            | 75.62 | 2 | 509 1123 |  | 9.0  |
| 198 | Q8TEA8 | D-tyrosyl-tRNA(Tyr) deacylase 1 OS=Homo sapiens GN=DTD1 PE=1 SV=2                                             | 75.53 | 1 | 394      |  | 7.7  |
|     | Q496C9 | D-tyrosyl-tRNA deacylase 1 homolog (S. cerevisiae) OS=Homo sapiens GN=DTD1 PE=2 SV=1                          | 75.53 | 1 | 394      |  | 7.7  |
| 199 | Q8NBS9 | Thioredoxin domain-containing protein 5 OS=Homo sapiens GN=TXNDC5 PE=1 SV=2                                   | 75.25 | 2 | 908 973  |  | 4.4  |
|     | Q86UY0 | TXNDC5 protein OS=Homo sapiens GN=TXNDC5 PE=2 SV=1                                                            | 75.25 | 2 | 908 973  |  | 4.4  |
|     | Q6EHZ3 | Putative uncharacterized protein STRF8 OS=Homo sapiens GN=STRF8 PE=2 SV=1                                     | 75.25 | 2 | 908 973  |  | 4.4  |
|     | Q658S9 | Putative uncharacterized protein DKFZp666l134 (Fragment) OS=Homo sapiens GN=DKFZp666l134 PE=2 SV=1            | 75.25 | 2 | 908 973  |  | 4.4  |
| 200 | Q8IY67 | Ribonucleoprotein PTB-binding 1 OS=Homo sapiens GN=RAVER1 PE=1 SV=1                                           | 75.23 | 1 | 644      |  | 13.5 |
|     | K7EKR9 | Ribonucleoprotein PTB-binding 1 (Fragment) OS=Homo sapiens GN=RAVER1 PE=4 SV=1                                | 75.23 | 1 | 644      |  | 13.5 |
|     | E9PAU2 | Ribonucleoprotein PTB-binding 1 OS=Homo sapiens GN=RAVER1 PE=2 SV=1                                           | 75.23 | 1 | 644      |  | 13.5 |
| 201 | Q15651 | High mobility group nucleosome-binding domain-containing protein 3 OS=Homo sapiens GN=HMG3 PE=1 SV=2          | 75.07 | 1 | 460      |  | 38.4 |
| 202 | Q92688 | Acidic leucine-rich nuclear phosphoprotein 32 family member B OS=Homo sapiens GN=ANP32B PE=1 SV=1             | 74.11 | 2 | 861 968  |  | 6.0  |
|     | Q53F35 | Acidic (Leucine-rich) nuclear phosphoprotein 32 family, member B variant (Fragment) OS=Homo sapiens PE=2 SV=1 | 74.11 | 2 | 861 968  |  | 6.0  |
| 203 | P54652 | Heat shock-related 70 kDa protein 2 OS=Homo sapiens GN=HSPA2 PE=1 SV=1                                        | 74.02 | 2 | 658 1219 |  | 14.6 |
| 204 | Q5EK51 | Lactoferrin OS=Homo sapiens PE=2 SV=1                                                                         | 73.92 | 2 | 926 1150 |  | 3.7  |
|     | Q5DSM0 | Growth-inhibiting protein 12 OS=Homo sapiens GN=GIG12 PE=2 SV=1                                               | 73.92 | 2 | 926 1150 |  | 3.7  |
|     | Q2TUW9 | Lactoferrin OS=Homo sapiens PE=2 SV=1                                                                         | 73.92 | 2 | 926 1150 |  | 3.7  |
|     | P02788 | Lactotransferrin OS=Homo sapiens GN=LTF PE=1 SV=6                                                             | 73.92 | 2 | 926 1150 |  | 3.7  |
|     | E7ER44 | Kaliocin-1 OS=Homo sapiens GN=LTF PE=2 SV=1                                                                   | 73.92 | 2 | 926 1150 |  | 3.7  |
|     | E7EQB2 | Kaliocin-1 (Fragment) OS=Homo sapiens GN=LTF PE=2 SV=1                                                        | 73.92 | 2 | 926 1150 |  | 3.7  |
|     | B7ZAL5 | cDNA, FLJ79229, highly similar to Lactotransferrin (EC 3.4.21.-) OS=Homo sapiens PE=2 SV=1                    | 73.92 | 2 | 926 1150 |  | 3.7  |
|     | B3VMW0 | Lactoferrin OS=Homo sapiens PE=2 SV=1                                                                         | 73.92 | 2 | 926 1150 |  | 3.7  |



|     |        |                                                                                                                              |       |   |          |  |      |
|-----|--------|------------------------------------------------------------------------------------------------------------------------------|-------|---|----------|--|------|
|     | B3KSL2 | cDNA FLJ36533 fis, clone TRACH2004428, highly similar to Lactotransferrin (EC 3.4.21.-) (Fragment) OS=Homo sapiens PE=2 SV=1 | 73.92 | 2 | 926 1150 |  | 3.7  |
|     | B2MV14 | Truncated lactoferrin OS=Homo sapiens GN=LTF PE=4 SV=1                                                                       | 73.92 | 2 | 926 1150 |  | 3.7  |
| 205 | H6VQN8 | MHC class II antigen (Fragment) OS=Homo sapiens GN=HLA-C PE=3 SV=1                                                           | 73.91 | 1 | 744      |  | 14.9 |
|     | G3ETQ6 | MHC class I antigen (Fragment) OS=Homo sapiens GN=HLA-B PE=3 SV=1                                                            | 73.91 | 1 | 744      |  | 14.9 |
|     | D1FXH2 | MHC class I antigen (Fragment) OS=Homo sapiens GN=HLA-B PE=3 SV=1                                                            | 73.91 | 1 | 744      |  | 14.9 |
| 206 | F6KRT8 | MHC class I antigen (Fragment) OS=Homo sapiens GN=HLA-B PE=3 SV=1                                                            | 73.91 | 1 | 760      |  | 22.9 |
| 207 | A7WPJ2 | MHC class I antigen (Fragment) OS=Homo sapiens GN=HLA-C PE=3 SV=1                                                            | 73.91 | 1 | 748      |  | 12.6 |
| 208 | Q9NSB2 | Keratin, type II cuticular Hb4 OS=Homo sapiens GN=KRT84 PE=2 SV=2                                                            | 73.18 | 2 | 213 1114 |  | 5.0  |
| 209 | Q9BU08 | Putative uncharacterized protein (Fragment) OS=Homo sapiens PE=2 SV=1                                                        | 72.88 | 1 | 151      |  | 2.0  |
|     | P48643 | T-complex protein 1 subunit epsilon OS=Homo sapiens GN=CCT5 PE=1 SV=1                                                        | 72.88 | 1 | 151      |  | 2.0  |
|     | E9PCA1 | T-complex protein 1 subunit epsilon OS=Homo sapiens GN=CCT5 PE=2 SV=1                                                        | 72.88 | 1 | 151      |  | 2.0  |
|     | E7ENZ3 | T-complex protein 1 subunit epsilon OS=Homo sapiens GN=CCT5 PE=2 SV=1                                                        | 72.88 | 1 | 151      |  | 2.0  |
|     | B7ZAR1 | T-complex protein 1 subunit epsilon OS=Homo sapiens GN=CCT5 PE=2 SV=1                                                        | 72.88 | 1 | 151      |  | 2.0  |
|     | B4DZT5 | cDNA FLJ53116, highly similar to T-complex protein 1 subunit epsilon OS=Homo sapiens PE=2 SV=1                               | 72.88 | 1 | 151      |  | 2.0  |
|     | B4DYD8 | T-complex protein 1 subunit epsilon OS=Homo sapiens GN=CCT5 PE=2 SV=1                                                        | 72.88 | 1 | 151      |  | 2.0  |
|     | B4DYC8 | cDNA FLJ52361, highly similar to T-complex protein 1 subunit epsilon OS=Homo sapiens PE=2 SV=1                               | 72.88 | 1 | 151      |  | 2.0  |
|     | B4DXI1 | cDNA FLJ54333, highly similar to T-complex protein 1 subunit epsilon OS=Homo sapiens PE=2 SV=1                               | 72.88 | 1 | 151      |  | 2.0  |
|     | B4DX08 | cDNA FLJ58784, highly similar to T-complex protein 1 subunit epsilon OS=Homo sapiens PE=2 SV=1                               | 72.88 | 1 | 151      |  | 2.0  |
| 210 | P12277 | Creatine kinase B-type OS=Homo sapiens GN=CKB PE=1 SV=1                                                                      | 72.65 | 2 | 505 1195 |  | 10.6 |
|     | G3V4N7 | Creatine kinase B-type (Fragment) OS=Homo sapiens GN=CKB PE=2 SV=1                                                           | 72.65 | 2 | 505 1195 |  | 10.6 |
|     | B4DP56 | cDNA FLJ52237, highly similar to Creatine kinase B-type (EC 2.7.3.2) OS=Homo sapiens PE=2 SV=1                               | 72.65 | 2 | 505 1195 |  | 10.6 |
| 211 | Q59FC4 | Presynaptic protein SAP97 variant (Fragment) OS=Homo sapiens PE=2 SV=1                                                       | 72.41 | 1 | 306      |  | 3.8  |
|     | Q12959 | Disks large homolog 1 OS=Homo sapiens GN=DLG1 PE=1 SV=2                                                                      | 72.41 | 1 | 306      |  | 3.8  |



|     |        |                                                                                                                                       |       |   |          |  |      |
|-----|--------|---------------------------------------------------------------------------------------------------------------------------------------|-------|---|----------|--|------|
|     | E7EQD7 | Disks large homolog 1 OS=Homo sapiens GN=DLG1 PE=2 SV=1                                                                               | 72.41 | 1 | 306      |  | 3.8  |
| 212 | P30086 | Phosphatidylethanolamine-binding protein 1 OS=Homo sapiens GN=PEBP1 PE=1 SV=3                                                         | 71.95 | 2 | 924 1086 |  | 8.6  |
|     | D9IAI1 | Phosphatidylethanolamine-binding protein 1 OS=Homo sapiens PE=2 SV=1                                                                  | 71.95 | 2 | 924 1086 |  | 8.6  |
| 213 | Q9BS26 | Endoplasmic reticulum resident protein 44 OS=Homo sapiens GN=ERP44 PE=1 SV=1                                                          | 70.99 | 1 | 37       |  | 3.0  |
| 214 | Q59EV3 | Myosin, heavy polypeptide 7, cardiac muscle, beta variant (Fragment) OS=Homo sapiens PE=2 SV=1                                        | 70.51 | 1 | 114      |  | 1.6  |
|     | P12883 | Myosin-7 OS=Homo sapiens GN=MYH7 PE=1 SV=5                                                                                            | 70.51 | 1 | 114      |  | 1.6  |
|     | A5YM51 | MYH7 protein (Fragment) OS=Homo sapiens GN=MYH7 PE=2 SV=1                                                                             | 70.51 | 1 | 114      |  | 1.6  |
| 215 | Q5JRS3 | Ubiquitin-like modifier-activating enzyme 1 (Fragment) OS=Homo sapiens GN=UBA1 PE=2 SV=1                                              | 70.50 | 1 | 948      |  | 4.4  |
|     | Q5JRS2 | Ubiquitin-like modifier-activating enzyme 1 (Fragment) OS=Homo sapiens GN=UBA1 PE=2 SV=1                                              | 70.50 | 1 | 948      |  | 4.4  |
|     | Q5JRS1 | Ubiquitin-like modifier-activating enzyme 1 (Fragment) OS=Homo sapiens GN=UBA1 PE=2 SV=1                                              | 70.50 | 1 | 948      |  | 4.4  |
|     | Q5JRS0 | Ubiquitin-like modifier-activating enzyme 1 (Fragment) OS=Homo sapiens GN=UBA1 PE=2 SV=1                                              | 70.50 | 1 | 948      |  | 4.4  |
|     | Q5JRR9 | Ubiquitin-like modifier-activating enzyme 1 (Fragment) OS=Homo sapiens GN=UBA1 PE=2 SV=1                                              | 70.50 | 1 | 948      |  | 4.4  |
|     | P22314 | Ubiquitin-like modifier-activating enzyme 1 OS=Homo sapiens GN=UBA1 PE=1 SV=3                                                         | 70.50 | 1 | 948      |  | 4.4  |
| 216 | Q8IVT2 | Uncharacterized protein C19orf21 OS=Homo sapiens GN=C19orf21 PE=1 SV=1                                                                | 70.18 | 2 | 246 794  |  | 4.4  |
| 217 | A7XZE4 | Beta tropomyosin isoform OS=Homo sapiens GN=TPM2b PE=2 SV=1                                                                           | 69.61 | 2 | 40 149   |  | 34.5 |
| 218 | Q9BRP8 | Partner of Y14 and mago OS=Homo sapiens GN=WIBG PE=1 SV=1                                                                             | 69.47 | 1 | 1132     |  | 14.2 |
| 219 | P17980 | 26S protease regulatory subunit 6A OS=Homo sapiens GN=PSMC3 PE=1 SV=3                                                                 | 69.32 | 1 | 410      |  | 2.6  |
|     | A8K781 | cDNA FLJ75299, highly similar to Xenopus laevis proteasome (prosome, macropain) 26S subunit, ATPase 3, mRNA OS=Homo sapiens PE=2 SV=1 | 69.32 | 1 | 410      |  | 2.6  |
| 220 | P31943 | Heterogeneous nuclear ribonucleoprotein H OS=Homo sapiens GN=HNRNPH1 PE=1 SV=4                                                        | 68.76 | 2 | 152 720  |  | 17.9 |
|     | G8JLB6 | Heterogeneous nuclear ribonucleoprotein H OS=Homo sapiens GN=HNRNPH1 PE=2 SV=1                                                        | 68.76 | 2 | 152 720  |  | 17.9 |
|     | E9PCY7 | Heterogeneous nuclear ribonucleoprotein H OS=Homo sapiens GN=HNRNPH1 PE=2 SV=1                                                        | 68.76 | 2 | 152 720  |  | 17.9 |
|     | D6RBM0 | Heterogeneous nuclear ribonucleoprotein H (Fragment) OS=Homo sapiens GN=HNRNPH1 PE=2 SV=1                                             | 68.76 | 2 | 152 720  |  | 17.9 |
| 221 | O43278 | Kunitz-type protease inhibitor 1 OS=Homo sapiens GN=SPINT1 PE=1 SV=2                                                                  | 68.61 | 2 | 372 863  |  | 5.3  |

|     |        |                                                                                                                                  |       |   |          |  |      |
|-----|--------|----------------------------------------------------------------------------------------------------------------------------------|-------|---|----------|--|------|
|     | H3BVD9 | Kunitz-type protease inhibitor 1 (Fragment) OS=Homo sapiens GN=SPINT1 PE=2 SV=1                                                  | 68.61 | 2 | 372 863  |  | 5.3  |
|     | H3BTQ8 | Kunitz-type protease inhibitor 1 (Fragment) OS=Homo sapiens GN=SPINT1 PE=2 SV=1                                                  | 68.61 | 2 | 372 863  |  | 5.3  |
|     | F5H877 | Kunitz-type protease inhibitor 1 OS=Homo sapiens GN=SPINT1 PE=2 SV=1                                                             | 68.61 | 2 | 372 863  |  | 5.3  |
|     | B4DTF6 | cDNA FLJ51604, highly similar to Kunitz-type protease inhibitor 1 OS=Homo sapiens PE=2 SV=1                                      | 68.61 | 2 | 372 863  |  | 5.3  |
|     | B2RBU9 | cDNA, FLJ95704, highly similar to Homo sapiens serine protease inhibitor, Kunitz type 1 (SPINT1), mRNA OS=Homo sapiens PE=2 SV=1 | 68.61 | 2 | 372 863  |  | 5.3  |
| 222 | Q6KB66 | Keratin, type II cytoskeletal 80 OS=Homo sapiens GN=KRT80 PE=1 SV=2                                                              | 68.59 | 1 | 765      |  | 2.7  |
| 223 | Q96ET4 | Similar to calcyphosine (Fragment) OS=Homo sapiens PE=2 SV=1                                                                     | 68.35 | 2 | 682 1200 |  | 10.5 |
|     | Q8NF12 | FLJ00390 protein (Fragment) OS=Homo sapiens GN=FLJ00390 PE=2 SV=1                                                                | 68.35 | 2 | 682 1200 |  | 10.5 |
|     | Q13938 | Calcyphosin OS=Homo sapiens GN=CAPS PE=1 SV=1                                                                                    | 68.35 | 2 | 682 1200 |  | 10.5 |
|     | K7ES72 | Calcyphosin (Fragment) OS=Homo sapiens GN=CAPS PE=4 SV=1                                                                         | 68.35 | 2 | 682 1200 |  | 10.5 |
|     | K7EL21 | Calcyphosin OS=Homo sapiens GN=CAPS PE=4 SV=1                                                                                    | 68.35 | 2 | 682 1200 |  | 10.5 |
| 224 | P62280 | 40S ribosomal protein S11 OS=Homo sapiens GN=RPS11 PE=1 SV=3                                                                     | 68.15 | 2 | 204 585  |  | 17.8 |
|     | M0QZC5 | 40S ribosomal protein S11 OS=Homo sapiens GN=RPS11 PE=4 SV=1                                                                     | 68.15 | 2 | 204 585  |  | 17.8 |
| 225 | Q6P2S0 | SRP9 protein OS=Homo sapiens GN=SRP9 PE=2 SV=1                                                                                   | 67.94 | 1 | 249      |  | 22.4 |
|     | Q659G3 | Putative uncharacterized protein DKFZp564M2223 OS=Homo sapiens GN=DKFZp564M2223 PE=2 SV=1                                        | 67.94 | 1 | 249      |  | 22.4 |
|     | P49458 | Signal recognition particle 9 kDa protein OS=Homo sapiens GN=SRP9 PE=1 SV=2                                                      | 67.94 | 1 | 249      |  | 22.4 |
|     | E9PE20 | Signal recognition particle 9 kDa protein OS=Homo sapiens GN=SRP9 PE=2 SV=1                                                      | 67.94 | 1 | 249      |  | 22.4 |
| 226 | Q9BZ93 | Prosome P27K protein (Fragment) OS=Homo sapiens GN=PSMA6 PE=2 SV=1                                                               | 67.82 | 1 | 745      |  | 11.8 |
|     | P60900 | Prosome subunit alpha type-6 OS=Homo sapiens GN=PSMA6 PE=1 SV=1                                                                  | 67.82 | 1 | 745      |  | 11.8 |
|     | G3V5Z7 | Prosome subunit alpha type OS=Homo sapiens GN=PSMA6 PE=2 SV=1                                                                    | 67.82 | 1 | 745      |  | 11.8 |
|     | G3V3U4 | Prosome subunit alpha type OS=Homo sapiens GN=PSMA6 PE=2 SV=1                                                                    | 67.82 | 1 | 745      |  | 11.8 |
|     | G3V3I1 | Prosome subunit alpha type OS=Homo sapiens GN=PSMA6 PE=2 SV=1                                                                    | 67.82 | 1 | 745      |  | 11.8 |
|     | G3V295 | Prosome subunit alpha type OS=Homo sapiens GN=PSMA6 PE=2 SV=1                                                                    | 67.82 | 1 | 745      |  | 11.8 |
|     | B4DXJ9 | Prosome (Prosome, macropain) subunit, alpha type, 6, isoform CRA_a OS=Homo sapiens GN=PSMA6 PE=2 SV=1                            | 67.82 | 1 | 745      |  | 11.8 |

**UniProt  
Human  
Protein  
IDs,  
cont.**

| <i>Gr<br/>p<br/>Nr.</i> | <i>Accessio<br/>n<br/>Number</i> | <i>Protein Name</i>                                                                                                      | <i>Prote<br/>in<br/>Scor<br/>e</i> | <i>Uniqu<br/>e<br/>PSMs</i> | <i>PSM Serial Nrs.</i> | <i>Oth<br/>er<br/>Grp.</i> | <i>%<br/>Seq.<br/>Cove<br/>r.</i> |
|-------------------------|----------------------------------|--------------------------------------------------------------------------------------------------------------------------|------------------------------------|-----------------------------|------------------------|----------------------------|-----------------------------------|
| 227                     | Q5CAQ5                           | Tumor rejection antigen (Gp96) 1 OS=Homo sapiens<br>GN=TRA1 PE=2 SV=1                                                    | 66.94                              | 2                           | 959 1162               |                            | 9.9                               |
|                         | P14625                           | Endoplasmic reticulum chaperone protein OS=Homo sapiens<br>GN=HSP90B1 PE=1 SV=1                                          | 66.94                              | 2                           | 959 1162               |                            | 9.9                               |
| 228                     | Q6EEV6                           | Small ubiquitin-related modifier 4 OS=Homo sapiens<br>GN=SUMO4 PE=1 SV=2                                                 | 66.77                              | 1                           | 259                    |                            | 8.5                               |
|                         | P61956                           | Small ubiquitin-related modifier 2 OS=Homo sapiens<br>GN=SUMO2 PE=1 SV=3                                                 | 66.77                              | 1                           | 259                    |                            | 8.5                               |
|                         | P55854                           | Small ubiquitin-related modifier 3 OS=Homo sapiens<br>GN=SUMO3 PE=1 SV=2                                                 | 66.77                              | 1                           | 259                    |                            | 8.5                               |
|                         | H7BZT4                           | Uncharacterized protein OS=Homo sapiens PE=4 SV=1                                                                        | 66.77                              | 1                           | 259                    |                            | 8.5                               |
|                         | B4DUW4                           | Small ubiquitin-related modifier 3 OS=Homo sapiens<br>GN=SUMO3 PE=2 SV=1                                                 | 66.77                              | 1                           | 259                    |                            | 8.5                               |
|                         | A8MUA9                           | SMT3 suppressor of mif two 3 homolog 3 (Yeast), isoform<br>CRA_d OS=Homo sapiens GN=SUMO3 PE=4 SV=1                      | 66.77                              | 1                           | 259                    |                            | 8.5                               |
|                         | A8MU27                           | Small ubiquitin-related modifier 3 OS=Homo sapiens<br>GN=SUMO3 PE=2 SV=1                                                 | 66.77                              | 1                           | 259                    |                            | 8.5                               |
| 229                     | Q9Y5B9                           | FACT complex subunit SPT16 OS=Homo sapiens<br>GN=SUPT16H PE=1 SV=1                                                       | 66.61                              | 2                           | 523 621                |                            | 3.8                               |
| 230                     | Q9H910                           | Hematological and neurological expressed 1-like protein<br>OS=Homo sapiens GN=HN1L PE=1 SV=1                             | 65.89                              | 1                           | 243                    |                            | 12.2                              |
|                         | H3BU16                           | Hematological and neurological-expressed 1-like protein<br>(Fragment) OS=Homo sapiens GN=HN1L PE=2 SV=1                  | 65.89                              | 1                           | 243                    |                            | 12.2                              |
|                         | H3BTV5                           | Hematological and neurological-expressed 1-like protein<br>(Fragment) OS=Homo sapiens GN=HN1L PE=2 SV=1                  | 65.89                              | 1                           | 243                    |                            | 12.2                              |
|                         | H3BMV3                           | Hematological and neurological-expressed 1-like protein<br>(Fragment) OS=Homo sapiens GN=HN1L PE=2 SV=1                  | 65.89                              | 1                           | 243                    |                            | 12.2                              |
|                         | H3BMT0                           | Hematological and neurological-expressed 1-like protein<br>(Fragment) OS=Homo sapiens GN=HN1L PE=2 SV=1                  | 65.89                              | 1                           | 243                    |                            | 12.2                              |
|                         | B4DLH4                           | Hematological and neurological-expressed 1-like protein<br>OS=Homo sapiens GN=HN1L PE=2 SV=1                             | 65.89                              | 1                           | 243                    |                            | 12.2                              |
|                         | B4DL85                           | cDNA FLJ60660, highly similar to Hematological and<br>neurological expressed 1-like protein OS=Homo sapiens PE=2<br>SV=1 | 65.89                              | 1                           | 243                    |                            | 12.2                              |

|     |        |                                                                                                                                |       |   |          |  |      |
|-----|--------|--------------------------------------------------------------------------------------------------------------------------------|-------|---|----------|--|------|
|     | A6NGP5 | Hematological and neurological-expressed 1-like protein OS=Homo sapiens GN=HN1L PE=2 SV=2                                      | 65.89 | 1 | 243      |  | 12.2 |
| 231 | Q96IR1 | RPS4X protein (Fragment) OS=Homo sapiens GN=RPS4X PE=2 SV=2                                                                    | 65.45 | 2 | 358 738  |  | 5.3  |
|     | Q53HV1 | Ribosomal protein S4, X-linked X isoform variant (Fragment) OS=Homo sapiens PE=2 SV=1                                          | 65.45 | 2 | 358 738  |  | 5.3  |
|     | P62701 | 40S ribosomal protein S4, X isoform OS=Homo sapiens GN=RPS4X PE=1 SV=2                                                         | 65.45 | 2 | 358 738  |  | 5.3  |
|     | B2R491 | Ribosomal protein S4, X-linked, isoform CRA_c OS=Homo sapiens GN=RPS4X PE=2 SV=1                                               | 65.45 | 2 | 358 738  |  | 5.3  |
| 232 | B7Z1Y2 | Fructose-bisphosphate aldolase OS=Homo sapiens PE=2 SV=1                                                                       | 65.08 | 1 | 686      |  | 12.2 |
| 233 | Q1JUQ4 | FK506 binding protein12 OS=Homo sapiens GN=FKBP12-Exip3 PE=4 SV=1                                                              | 64.72 | 1 | 69       |  | 35.1 |
|     | Q1JUQ3 | FK506 binding protein12 OS=Homo sapiens GN=FKBP12-Exin PE=4 SV=1                                                               | 64.72 | 1 | 69       |  | 35.1 |
|     | P62942 | Peptidyl-prolyl cis-trans isomerase FKBP1A OS=Homo sapiens GN=FKBP1A PE=1 SV=2                                                 | 64.72 | 1 | 69       |  | 35.1 |
| 234 | P14174 | Macrophage migration inhibitory factor OS=Homo sapiens GN=MIF PE=1 SV=4                                                        | 64.14 | 1 | 390      |  | 7.8  |
|     | I4AY87 | Macrophage migration inhibitory factor (Fragment) OS=Homo sapiens PE=2 SV=1                                                    | 64.14 | 1 | 390      |  | 7.8  |
| 235 | P11487 | Fibroblast growth factor 3 OS=Homo sapiens GN=FGF3 PE=1 SV=1                                                                   | 63.74 | 1 | 45       |  | 4.2  |
| 236 | P09429 | High mobility group protein B1 OS=Homo sapiens GN=HMGB1 PE=1 SV=3                                                              | 63.68 | 2 | 757 865  |  | 21.0 |
|     | B3KQ05 | cDNA FLJ32558 fis, clone SPLEN1000143, highly similar to High mobility group protein B1 OS=Homo sapiens PE=2 SV=1              | 63.68 | 2 | 757 865  |  | 21.0 |
| 237 | P27482 | Calmodulin-like protein 3 OS=Homo sapiens GN=CALML3 PE=1 SV=2                                                                  | 62.95 | 1 | 8        |  | 8.1  |
| 238 | B4E259 | cDNA FLJ59607, moderately similar to D-dopachrome decarboxylase (EC 4.1.1.84) OS=Homo sapiens PE=2 SV=1                        | 62.87 | 2 | 841 893  |  | 17.1 |
| 239 | P30101 | Protein disulfide-isomerase A3 OS=Homo sapiens GN=PDIA3 PE=1 SV=4                                                              | 62.41 | 2 | 820 1017 |  | 15.5 |
|     | G5EA52 | Protein disulfide isomerase family A, member 3, isoform CRA_b OS=Homo sapiens GN=PDIA3 PE=3 SV=1                               | 62.41 | 2 | 820 1017 |  | 15.5 |
|     | B3KQT9 | cDNA PSEC0175 fis, clone OVARC1000169, highly similar to Protein disulfide-isomerase A3 (EC 5.3.4.1) OS=Homo sapiens PE=2 SV=1 | 62.41 | 2 | 820 1017 |  | 15.5 |
|     | B3KQT2 | cDNA PSEC0148 fis, clone PLACE1007202, highly similar to Protein disulfide-isomerase A3 (EC 5.3.4.1) OS=Homo sapiens PE=2 SV=1 | 62.41 | 2 | 820 1017 |  | 15.5 |
| 240 | O15230 | Laminin subunit alpha-5 OS=Homo sapiens GN=LAMA5 PE=1 SV=8                                                                     | 62.23 | 1 | 1028     |  | 8.1  |
| 241 | Q96AE4 | Far upstream element-binding protein 1 OS=Homo sapiens GN=FUBP1 PE=1 SV=3                                                      | 62.01 | 2 | 62 595   |  | 8.1  |

|     |        |                                                                                                                      |       |   |          |  |      |
|-----|--------|----------------------------------------------------------------------------------------------------------------------|-------|---|----------|--|------|
|     | Q59FU3 | Far upstream element-binding protein variant (Fragment) OS=Homo sapiens PE=2 SV=1                                    | 62.01 | 2 | 62 595   |  | 8.1  |
|     | E9PEB5 | Far upstream element-binding protein 1 OS=Homo sapiens GN=FUBP1 PE=2 SV=1                                            | 62.01 | 2 | 62 595   |  | 8.1  |
|     | B4E0X8 | cDNA FLJ61021, highly similar to Far upstream element-binding protein 1 OS=Homo sapiens PE=2 SV=1                    | 62.01 | 2 | 62 595   |  | 8.1  |
|     | B4DWL1 | cDNA FLJ59240, highly similar to Far upstream element-binding protein 1 OS=Homo sapiens PE=2 SV=1                    | 62.01 | 2 | 62 595   |  | 8.1  |
|     | B4DT31 | Far upstream element-binding protein 1 OS=Homo sapiens GN=FUBP1 PE=2 SV=1                                            | 62.01 | 2 | 62 595   |  | 8.1  |
| 242 | Q14974 | Importin subunit beta-1 OS=Homo sapiens GN=KPNB1 PE=1 SV=2                                                           | 61.41 | 1 | 175      |  | 3.4  |
|     | J3QR48 | Importin subunit beta-1 (Fragment) OS=Homo sapiens GN=KPNB1 PE=4 SV=1                                                | 61.41 | 1 | 175      |  | 3.4  |
|     | B2RBR9 | cDNA, FLJ95650, highly similar to Homo sapiens karyopherin (importin) beta 1 (KPNB1), mRNA OS=Homo sapiens PE=2 SV=1 | 61.41 | 1 | 175      |  | 3.4  |
| 243 | P01308 | Insulin OS=Homo sapiens GN=INS PE=1 SV=1                                                                             | 61.39 | 2 | 598 1076 |  | 25.5 |
|     | I3WAC9 | Preproinsulin OS=Homo sapiens GN=INS PE=3 SV=1                                                                       | 61.39 | 2 | 598 1076 |  | 25.5 |
|     | F6MZK5 | Insulin (Precursor) OS=Homo sapiens GN=INS PE=2 SV=1                                                                 | 61.39 | 2 | 598 1076 |  | 25.5 |
|     | A6XGL2 | Insulin OS=Homo sapiens GN=INS PE=3 SV=1                                                                             | 61.39 | 2 | 598 1076 |  | 25.5 |
| 244 | Q7Z2V5 | Putative uncharacterized protein DKFZp686J01190 (Fragment) OS=Homo sapiens GN=DKFZp686J01190 PE=2 SV=1               | 61.38 | 1 | 878      |  | 3.5  |
|     | Q59E92 | Putative uncharacterized protein (Fragment) OS=Homo sapiens PE=2 SV=1                                                | 61.38 | 1 | 878      |  | 3.5  |
|     | P17844 | Probable ATP-dependent RNA helicase DDX5 OS=Homo sapiens GN=DDX5 PE=1 SV=1                                           | 61.38 | 1 | 878      |  | 3.5  |
|     | J3QRQ7 | Probable ATP-dependent RNA helicase DDX5 (Fragment) OS=Homo sapiens GN=DDX5 PE=4 SV=1                                | 61.38 | 1 | 878      |  | 3.5  |
|     | J3QR02 | Probable ATP-dependent RNA helicase DDX5 OS=Homo sapiens GN=DDX5 PE=4 SV=1                                           | 61.38 | 1 | 878      |  | 3.5  |
|     | J3KTA4 | Probable ATP-dependent RNA helicase DDX5 OS=Homo sapiens GN=DDX5 PE=3 SV=1                                           | 61.38 | 1 | 878      |  | 3.5  |
|     | J3KRX8 | Probable ATP-dependent RNA helicase DDX5 (Fragment) OS=Homo sapiens GN=DDX5 PE=4 SV=1                                | 61.38 | 1 | 878      |  | 3.5  |
|     | C1IK54 | DEAD box polypeptide 5/ets variant protein 4 fusion protein OS=Homo sapiens GN=DDX5-ETV4 fusion PE=2 SV=1            | 61.38 | 1 | 878      |  | 3.5  |
|     | B5BUE6 | ATP-dependent RNA helicase DDX5 (Fragment) OS=Homo sapiens GN=DDX5 PE=2 SV=1                                         | 61.38 | 1 | 878      |  | 3.5  |
|     | B4DN41 | cDNA FLJ53366, highly similar to Probable ATP-dependent RNA helicase DDX5 (EC 3.6.1.-) OS=Homo sapiens PE=2 SV=1     | 61.38 | 1 | 878      |  | 3.5  |
| 245 | P61769 | Beta-2-microglobulin OS=Homo sapiens GN=B2M PE=1 SV=1                                                                | 60.93 | 2 | 349 1210 |  | 23.8 |
|     | F5H6I0 | Beta-2-microglobulin form pl 5.3 OS=Homo sapiens GN=B2M PE=3 SV=1                                                    | 60.93 | 2 | 349 1210 |  | 23.8 |

|     |        |                                                                                                                                     |       |   |          |  |      |
|-----|--------|-------------------------------------------------------------------------------------------------------------------------------------|-------|---|----------|--|------|
|     | B4E0X1 | cDNA FLJ57067, highly similar to Beta-2-microglobulin OS=Homo sapiens PE=2 SV=1                                                     | 60.93 | 2 | 349 1210 |  | 23.8 |
|     | A6XMH5 | Beta-2-microglobulin OS=Homo sapiens PE=3 SV=1                                                                                      | 60.93 | 2 | 349 1210 |  | 23.8 |
| 246 | Q9BW71 | HIRA-interacting protein 3 OS=Homo sapiens GN=HIRIP3 PE=1 SV=3                                                                      | 60.88 | 1 | 297      |  | 3.6  |
|     | B2R6A9 | cDNA, FLJ92868, highly similar to Homo sapiens HIRA interacting protein 3 (HIRIP3), mRNA OS=Homo sapiens PE=2 SV=1                  | 60.88 | 1 | 297      |  | 3.6  |
| 247 | O43765 | Small glutamine-rich tetratricopeptide repeat-containing protein alpha OS=Homo sapiens GN=SGTA PE=1 SV=1                            | 60.84 | 1 | 17       |  | 4.5  |
|     | K7EMD6 | Small glutamine-rich tetratricopeptide repeat-containing protein alpha (Fragment) OS=Homo sapiens GN=SGTA PE=4 SV=1                 | 60.84 | 1 | 17       |  | 4.5  |
|     | B4DEA6 | cDNA FLJ56566, highly similar to Small glutamine-rich tetratricopeptiderepeat-containing protein A OS=Homo sapiens PE=2 SV=1        | 60.84 | 1 | 17       |  | 4.5  |
| 248 | Q9UMY2 | 3-phosphoglycerate dehydrogenase (Fragment) OS=Homo sapiens GN=PGDH3 PE=2 SV=1                                                      | 60.66 | 1 | 329      |  | 2.2  |
|     | Q96RV5 | 3-phosphoglycerate dehydrogenase (Fragment) OS=Homo sapiens PE=2 SV=1                                                               | 60.66 | 1 | 329      |  | 2.2  |
|     | Q8N5M8 | PHGDH protein (Fragment) OS=Homo sapiens GN=PHGDH PE=2 SV=3                                                                         | 60.66 | 1 | 329      |  | 2.2  |
|     | Q5SZU1 | D-3-phosphoglycerate dehydrogenase OS=Homo sapiens GN=PHGDH PE=4 SV=1                                                               | 60.66 | 1 | 329      |  | 2.2  |
|     | O43175 | D-3-phosphoglycerate dehydrogenase OS=Homo sapiens GN=PHGDH PE=1 SV=4                                                               | 60.66 | 1 | 329      |  | 2.2  |
|     | B3KSC3 | cDNA FLJ35987 fis, clone TESTI2014269, highly similar to D-3-phosphoglycerate dehydrogenase (EC 1.1.1.95) OS=Homo sapiens PE=2 SV=1 | 60.66 | 1 | 329      |  | 2.2  |
| 249 | Q6X4U4 | Sclerostin domain-containing protein 1 OS=Homo sapiens GN=SOSTDC1 PE=1 SV=2                                                         | 60.38 | 1 | 792      |  | 5.3  |
|     | A8MUA6 | Sclerostin domain-containing protein 1 OS=Homo sapiens GN=SOSTDC1 PE=2 SV=1                                                         | 60.38 | 1 | 792      |  | 5.3  |
|     | A4D125 | Sclerostin domain containing 1 OS=Homo sapiens GN=SOSTDC1 PE=2 SV=1                                                                 | 60.38 | 1 | 792      |  | 5.3  |
| 250 | C9J7P1 | Drebrin-like protein OS=Homo sapiens GN=DBNL PE=2 SV=2                                                                              | 60.26 | 1 | 825      |  | 3.2  |
|     | B4DXL9 | cDNA FLJ53677, highly similar to Drebrin-like protein OS=Homo sapiens PE=2 SV=1                                                     | 60.26 | 1 | 825      |  | 3.2  |
|     | B4DUF9 | cDNA FLJ59432, highly similar to Drebrin-like protein OS=Homo sapiens PE=2 SV=1                                                     | 60.26 | 1 | 825      |  | 3.2  |
|     | B4DDP6 | Drebrin-like protein OS=Homo sapiens GN=DBNL PE=2 SV=1                                                                              | 60.26 | 1 | 825      |  | 3.2  |
|     | B4DDD6 | Drebrin-like protein OS=Homo sapiens GN=DBNL PE=2 SV=1                                                                              | 60.26 | 1 | 825      |  | 3.2  |
| 251 | Q6FHU3 | PSME1 protein (Fragment) OS=Homo sapiens GN=PSME1 PE=2 SV=1                                                                         | 60.10 | 1 | 169      |  | 9.9  |
|     | Q06323 | Proteasome activator complex subunit 1 OS=Homo sapiens GN=PSME1 PE=1 SV=1                                                           | 60.10 | 1 | 169      |  | 9.9  |

|     |        |                                                                                                   |       |   |         |  |      |
|-----|--------|---------------------------------------------------------------------------------------------------|-------|---|---------|--|------|
|     | H0YNE3 | Proteasome activator complex subunit 1 OS=Homo sapiens<br>GN=PSME1 PE=2 SV=1                      | 60.10 | 1 | 169     |  | 9.9  |
|     | A6NJG9 | Proteasome activator complex subunit 1 OS=Homo sapiens<br>GN=PSME1 PE=2 SV=2                      | 60.10 | 1 | 169     |  | 9.9  |
| 252 | Q96IZ0 | PRKC apoptosis WT1 regulator protein OS=Homo sapiens<br>GN=PAWR PE=1 SV=1                         | 59.92 | 1 | 178     |  | 3.8  |
| 253 | P46782 | 40S ribosomal protein S5 OS=Homo sapiens GN=RPS5 PE=1<br>SV=4                                     | 59.62 | 1 | 116     |  | 14.2 |
|     | M0R0R2 | 40S ribosomal protein S5 OS=Homo sapiens GN=RPS5 PE=4<br>SV=1                                     | 59.62 | 1 | 116     |  | 14.2 |
|     | M0R0F0 | 40S ribosomal protein S5 (Fragment) OS=Homo sapiens<br>GN=RPS5 PE=4 SV=1                          | 59.62 | 1 | 116     |  | 14.2 |
|     | M0QZN2 | 40S ribosomal protein S5 OS=Homo sapiens GN=RPS5 PE=4<br>SV=1                                     | 59.62 | 1 | 116     |  | 14.2 |
| 254 | Q9BX68 | Histidine triad nucleotide-binding protein 2, mitochondrial<br>OS=Homo sapiens GN=HINT2 PE=1 SV=1 | 59.54 | 2 | 223 360 |  | 19.5 |
|     | Q8WYJ5 | Protein kinase C inhibitor-2 OS=Homo sapiens PE=2 SV=1                                            | 59.54 | 2 | 223 360 |  | 19.5 |
| 255 | Q53HV6 | Niemann-Pick disease, type C2 variant (Fragment) OS=Homo<br>sapiens PE=2 SV=1                     | 58.66 | 1 | 227     |  | 9.2  |
|     | P61916 | Epididymal secretory protein E1 OS=Homo sapiens<br>GN=NPC2 PE=1 SV=1                              | 58.66 | 1 | 227     |  | 9.2  |
|     | J3KMY5 | Epididymal secretory protein E1 OS=Homo sapiens<br>GN=NPC2 PE=4 SV=1                              | 58.66 | 1 | 227     |  | 9.2  |
|     | H0YIZ1 | Epididymal secretory protein E1 (Fragment) OS=Homo<br>sapiens GN=NPC2 PE=4 SV=1                   | 58.66 | 1 | 227     |  | 9.2  |
|     | G3V3E8 | Epididymal secretory protein E1 OS=Homo sapiens<br>GN=NPC2 PE=2 SV=1                              | 58.66 | 1 | 227     |  | 9.2  |
|     | G3V3D1 | Epididymal secretory protein E1 (Fragment) OS=Homo<br>sapiens GN=NPC2 PE=2 SV=1                   | 58.66 | 1 | 227     |  | 9.2  |
|     | G3V2V8 | Epididymal secretory protein E1 (Fragment) OS=Homo<br>sapiens GN=NPC2 PE=2 SV=1                   | 58.66 | 1 | 227     |  | 9.2  |
|     | E7EMS2 | Epididymal secretory protein E1 OS=Homo sapiens<br>GN=NPC2 PE=2 SV=1                              | 58.66 | 1 | 227     |  | 9.2  |
|     | B4DV10 | cDNA FLJ59142, highly similar to Epididymal secretory<br>protein E1 OS=Homo sapiens PE=2 SV=1     | 58.66 | 1 | 227     |  | 9.2  |
|     | B4DQV7 | Epididymal secretory protein E1 OS=Homo sapiens<br>GN=NPC2 PE=2 SV=1                              | 58.66 | 1 | 227     |  | 9.2  |
| 256 | Q59EF5 | Splicing factor, arginine/serine-rich 4 variant (Fragment)<br>OS=Homo sapiens PE=2 SV=1           | 58.64 | 1 | 637     |  | 3.3  |
|     | Q53F45 | Splicing factor, arginine/serine-rich 4 variant (Fragment)<br>OS=Homo sapiens PE=2 SV=1           | 58.64 | 1 | 637     |  | 3.3  |
|     | Q08170 | Serine/arginine-rich splicing factor 4 OS=Homo sapiens<br>GN=SRSF4 PE=1 SV=2                      | 58.64 | 1 | 637     |  | 3.3  |
|     | A8K644 | Splicing factor, arginine/serine-rich 4, isoform CRA_b<br>OS=Homo sapiens GN=SFRS4 PE=2 SV=1      | 58.64 | 1 | 637     |  | 3.3  |



|     |        |                                                                                                                                               |       |   |         |  |     |
|-----|--------|-----------------------------------------------------------------------------------------------------------------------------------------------|-------|---|---------|--|-----|
| 257 | Q16610 | Extracellular matrix protein 1 OS=Homo sapiens GN=ECM1 PE=1 SV=2                                                                              | 58.63 | 2 | 564 836 |  | 4.7 |
|     | C8CHS3 | Truncated extracellular matrix protein 1 OS=Homo sapiens GN=ECM1 PE=2 SV=1                                                                    | 58.63 | 2 | 564 836 |  | 4.7 |
| 258 | Q969G3 | SWI/SNF-related matrix-associated actin-dependent regulator of chromatin subfamily E member 1 OS=Homo sapiens GN=SMARCE1 PE=1 SV=2            | 58.59 | 1 | 810     |  | 2.7 |
|     | J3QR61 | SWI/SNF-related matrix-associated actin-dependent regulator of chromatin subfamily E member 1 (Fragment) OS=Homo sapiens GN=SMARCE1 PE=4 SV=1 | 58.59 | 1 | 810     |  | 2.7 |
|     | J3QKS7 | SWI/SNF-related matrix-associated actin-dependent regulator of chromatin subfamily E member 1 (Fragment) OS=Homo sapiens GN=SMARCE1 PE=4 SV=1 | 58.59 | 1 | 810     |  | 2.7 |
|     | J3KT85 | SWI/SNF-related matrix-associated actin-dependent regulator of chromatin subfamily E member 1 (Fragment) OS=Homo sapiens GN=SMARCE1 PE=4 SV=1 | 58.59 | 1 | 810     |  | 2.7 |
|     | C0IMW8 | Smarce1 variant 10 (Fragment) OS=Homo sapiens PE=2 SV=1                                                                                       | 58.59 | 1 | 810     |  | 2.7 |
|     | C0IMW7 | SWI/SNF-related matrix-associated actin-dependent regulator of chromatin subfamily E member 1 OS=Homo sapiens GN=SMARCE1 PE=2 SV=1            | 58.59 | 1 | 810     |  | 2.7 |
|     | C0IMW5 | SWI/SNF-related matrix-associated actin-dependent regulator of chromatin subfamily E member 1 OS=Homo sapiens GN=SMARCE1 PE=2 SV=1            | 58.59 | 1 | 810     |  | 2.7 |
|     | C0IMW4 | SWI/SNF-related matrix-associated actin-dependent regulator of chromatin subfamily E member 1 OS=Homo sapiens GN=SMARCE1 PE=2 SV=1            | 58.59 | 1 | 810     |  | 2.7 |
|     | B4DGM3 | SWI/SNF-related matrix-associated actin-dependent regulator of chromatin subfamily E member 1 OS=Homo sapiens GN=SMARCE1 PE=2 SV=1            | 58.59 | 1 | 810     |  | 2.7 |
|     | B4DFR4 | SWI/SNF-related matrix-associated actin-dependent regulator of chromatin subfamily E member 1 OS=Homo sapiens GN=SMARCE1 PE=2 SV=1            | 58.59 | 1 | 810     |  | 2.7 |

**UniProt  
Human  
Protein  
IDs,  
cont.**

| <i>Gr<br/>p<br/>Nr.</i> | <i>Accessio<br/>n<br/>Number</i> | <i>Protein Name</i> | <i>Prote<br/>in<br/>Scor<br/>e</i> | <i>Uniqu<br/>e<br/>PSMs</i> | <i>PSM Serial Nrs.</i> | <i>Oth<br/>er<br/>Grp.</i> | <i>%<br/>Seq.<br/>Cove<br/>r.</i> |
|-------------------------|----------------------------------|---------------------|------------------------------------|-----------------------------|------------------------|----------------------------|-----------------------------------|
|-------------------------|----------------------------------|---------------------|------------------------------------|-----------------------------|------------------------|----------------------------|-----------------------------------|



|     |        |                                                                                                                                       |       |   |          |  |     |
|-----|--------|---------------------------------------------------------------------------------------------------------------------------------------|-------|---|----------|--|-----|
| 259 | Q86VP6 | Cullin-associated NEDD8-dissociated protein 1 OS=Homo sapiens GN=CAND1 PE=1 SV=2                                                      | 58.34 | 2 | 381 1091 |  | 4.6 |
|     | A8K8U1 | cDNA FLJ77762, highly similar to Homo sapiens cullin-associated and neddylation-dissociated 1 (CAND1), mRNA OS=Homo sapiens PE=2 SV=1 | 58.34 | 2 | 381 1091 |  | 4.6 |
| 260 | P09012 | U1 small nuclear ribonucleoprotein A OS=Homo sapiens GN=SNRPA PE=1 SV=3                                                               | 57.99 | 1 | 298      |  | 7.8 |
|     | M0R2B8 | U1 small nuclear ribonucleoprotein A (Fragment) OS=Homo sapiens GN=SNRPA PE=4 SV=1                                                    | 57.99 | 1 | 298      |  | 7.8 |
|     | M0R221 | U1 small nuclear ribonucleoprotein A (Fragment) OS=Homo sapiens GN=SNRPA PE=4 SV=1                                                    | 57.99 | 1 | 298      |  | 7.8 |
|     | M0R0G9 | U1 small nuclear ribonucleoprotein A OS=Homo sapiens GN=SNRPA PE=4 SV=1                                                               | 57.99 | 1 | 298      |  | 7.8 |
|     | M0QZG7 | U1 small nuclear ribonucleoprotein A (Fragment) OS=Homo sapiens GN=SNRPA PE=4 SV=1                                                    | 57.99 | 1 | 298      |  | 7.8 |
|     | M0QXK2 | U1 small nuclear ribonucleoprotein A (Fragment) OS=Homo sapiens GN=SNRPA PE=4 SV=1                                                    | 57.99 | 1 | 298      |  | 7.8 |
|     | B2R802 | cDNA, FLJ93681, highly similar to Homo sapiens small nuclear ribonucleoprotein polypeptide A (SNRPA), mRNA OS=Homo sapiens PE=2 SV=1  | 57.99 | 1 | 298      |  | 7.8 |
| 261 | Q96IH1 | Fascin (Fragment) OS=Homo sapiens GN=FSCN1 PE=2 SV=1                                                                                  | 57.99 | 2 | 374 1039 |  | 9.5 |
|     | Q16658 | Fascin OS=Homo sapiens GN=FSCN1 PE=1 SV=3                                                                                             | 57.99 | 2 | 374 1039 |  | 9.5 |
|     | J3KNT0 | Fascin OS=Homo sapiens GN=FSCN1 PE=3 SV=1                                                                                             | 57.99 | 2 | 374 1039 |  | 9.5 |
|     | B3KTA3 | Fascin OS=Homo sapiens PE=2 SV=1                                                                                                      | 57.99 | 2 | 374 1039 |  | 9.5 |
| 262 | Q53EM5 | Transketolase variant (Fragment) OS=Homo sapiens PE=2 SV=1                                                                            | 57.21 | 1 | 120      |  | 5.9 |
|     | P29401 | Transketolase OS=Homo sapiens GN=TKT PE=1 SV=3                                                                                        | 57.21 | 1 | 120      |  | 5.9 |
|     | B4E022 | Transketolase OS=Homo sapiens GN=TKT PE=2 SV=1                                                                                        | 57.21 | 1 | 120      |  | 5.9 |
|     | B4DVU1 | cDNA FLJ53217, highly similar to Transketolase (EC 2.2.1.1) OS=Homo sapiens PE=2 SV=1                                                 | 57.21 | 1 | 120      |  | 5.9 |
|     | B3KSI4 | cDNA FLJ36348 fis, clone THYMU2007025, highly similar to TRANSKETOLASE (EC 2.2.1.1) OS=Homo sapiens PE=2 SV=1                         | 57.21 | 1 | 120      |  | 5.9 |
|     | B3KPZ8 | cDNA FLJ32530 fis, clone SMINT2000185, highly similar to TRANSKETOLASE (EC 2.2.1.1) OS=Homo sapiens PE=2 SV=1                         | 57.21 | 1 | 120      |  | 5.9 |
| 263 | Q96B58 | Nucleolysin TIA-1 isoform p40 OS=Homo sapiens GN=TIA1 PE=2 SV=1                                                                       | 57.01 | 1 | 348      |  | 7.5 |
|     | Q59G98 | TIA1 protein variant (Fragment) OS=Homo sapiens PE=2 SV=1                                                                             | 57.01 | 1 | 348      |  | 7.5 |
|     | P31483 | Nucleolysin TIA-1 isoform p40 OS=Homo sapiens GN=TIA1 PE=1 SV=3                                                                       | 57.01 | 1 | 348      |  | 7.5 |
|     | F8W8I6 | Nucleolysin TIA-1 isoform p40 OS=Homo sapiens GN=TIA1 PE=2 SV=1                                                                       | 57.01 | 1 | 348      |  | 7.5 |
|     | E5RGV5 | Nucleolysin TIA-1 isoform p40 OS=Homo sapiens GN=TIA1 PE=2 SV=1                                                                       | 57.01 | 1 | 348      |  | 7.5 |

|     |        |                                                                                                                                                           |       |   |         |  |      |
|-----|--------|-----------------------------------------------------------------------------------------------------------------------------------------------------------|-------|---|---------|--|------|
|     | E5RG67 | Nucleolysin TIA-1 isoform p40 OS=Homo sapiens GN=TIA1 PE=2 SV=1                                                                                           | 57.01 | 1 | 348     |  | 7.5  |
| 264 | P51858 | Hepatoma-derived growth factor OS=Homo sapiens GN=HDGF PE=1 SV=1                                                                                          | 56.96 | 1 | 514     |  | 7.1  |
|     | B2RDE8 | cDNA, FLJ96580, highly similar to Homo sapiens hepatoma-derived growth factor (high-mobility group protein 1-like) (HDGF), mRNA OS=Homo sapiens PE=2 SV=1 | 56.96 | 1 | 514     |  | 7.1  |
| 265 | P37802 | Transgelin-2 OS=Homo sapiens GN=TAGLN2 PE=1 SV=3                                                                                                          | 56.65 | 1 | 1136    |  | 5.5  |
| 266 | P62861 | 40S ribosomal protein S30 OS=Homo sapiens GN=FAU PE=1 SV=1                                                                                                | 56.51 | 2 | 186 440 |  | 11.2 |
|     | E9PR30 | 40S ribosomal protein S30 OS=Homo sapiens GN=FAU PE=2 SV=1                                                                                                | 56.51 | 2 | 186 440 |  | 11.2 |
| 267 | Q53F91 | Villin 1 variant (Fragment) OS=Homo sapiens PE=2 SV=1                                                                                                     | 56.35 | 1 | 854     |  | 10.3 |
|     | P09327 | Villin-1 OS=Homo sapiens GN=VIL1 PE=1 SV=4                                                                                                                | 56.35 | 1 | 854     |  | 10.3 |
| 268 | Q6P452 | Annexin OS=Homo sapiens GN=ANXA4 PE=2 SV=1                                                                                                                | 56.14 | 1 | 352     |  | 4.6  |
|     | Q6LES2 | Annexin (Fragment) OS=Homo sapiens GN=ANXA4 PE=2 SV=1                                                                                                     | 56.14 | 1 | 352     |  | 4.6  |
|     | P09525 | Annexin A4 OS=Homo sapiens GN=ANXA4 PE=1 SV=4                                                                                                             | 56.14 | 1 | 352     |  | 4.6  |
|     | B4E1S2 | Annexin OS=Homo sapiens PE=2 SV=1                                                                                                                         | 56.14 | 1 | 352     |  | 4.6  |
|     | B4DE02 | Annexin OS=Homo sapiens PE=2 SV=1                                                                                                                         | 56.14 | 1 | 352     |  | 4.6  |
|     | B4DDZ4 | Annexin OS=Homo sapiens PE=2 SV=1                                                                                                                         | 56.14 | 1 | 352     |  | 4.6  |
|     | B4DDF9 | Annexin OS=Homo sapiens GN=ANXA4 PE=2 SV=1                                                                                                                | 56.14 | 1 | 352     |  | 4.6  |
| 269 | Q8TB01 | Similar to cytoskeleton-associated protein 4 (Fragment) OS=Homo sapiens PE=2 SV=1                                                                         | 56.12 | 1 | 555     |  | 4.8  |
|     | Q6NWZ1 | CKAP4 protein (Fragment) OS=Homo sapiens GN=CKAP4 PE=2 SV=1                                                                                               | 56.12 | 1 | 555     |  | 4.8  |
|     | Q07065 | Cytoskeleton-associated protein 4 OS=Homo sapiens GN=CKAP4 PE=1 SV=2                                                                                      | 56.12 | 1 | 555     |  | 4.8  |
|     | B3KVX6 | cDNA FLJ41699 fis, clone HCHON2004776, highly similar to Homo sapiens cytoskeleton-associated protein 4 (CKAP4), mRNA OS=Homo sapiens PE=2 SV=1           | 56.12 | 1 | 555     |  | 4.8  |
| 270 | P10599 | Thioredoxin OS=Homo sapiens GN=TXN PE=1 SV=3                                                                                                              | 55.87 | 1 | 958     |  | 21.0 |
|     | H9ZYJ2 | Thioredoxin OS=Homo sapiens GN=TXN PE=2 SV=1                                                                                                              | 55.87 | 1 | 958     |  | 21.0 |
| 271 | Q13740 | CD166 antigen OS=Homo sapiens GN=ALCAM PE=1 SV=2                                                                                                          | 55.49 | 2 | 866 894 |  | 2.0  |
|     | F5GXJ9 | CD166 antigen OS=Homo sapiens GN=ALCAM PE=2 SV=1                                                                                                          | 55.49 | 2 | 866 894 |  | 2.0  |
|     | B4DX43 | cDNA FLJ52980, highly similar to CD166 antigen OS=Homo sapiens PE=2 SV=1                                                                                  | 55.49 | 2 | 866 894 |  | 2.0  |
|     | B3KNN9 | cDNA FLJ30070 fis, clone ASTRO2000046, highly similar to CD166 ANTIGEN OS=Homo sapiens PE=2 SV=1                                                          | 55.49 | 2 | 866 894 |  | 2.0  |
| 272 | Q68D11 | Putative uncharacterized protein DKFZp686K23100 OS=Homo sapiens GN=DKFZp686K23100 PE=2 SV=1                                                               | 54.90 | 2 | 802 804 |  | 2.7  |
|     | P43243 | Matrin-3 OS=Homo sapiens GN=MATR3 PE=1 SV=2                                                                                                               | 54.90 | 2 | 802 804 |  | 2.7  |
|     | A8MXP9 | Matrin-3 OS=Homo sapiens GN=MATR3 PE=4 SV=1                                                                                                               | 54.90 | 2 | 802 804 |  | 2.7  |

|     |        |                                                                                                             |       |   |      |  |      |
|-----|--------|-------------------------------------------------------------------------------------------------------------|-------|---|------|--|------|
| 273 | Q9UIS4 | Small nuclear ribonucleoprotein-associated protein OS=Homo sapiens GN=SNRPB PE=2 SV=1                       | 54.44 | 1 | 1134 |  | 3.3  |
|     | Q6LBS1 | Small nuclear ribonucleoprotein-associated protein (Fragment) OS=Homo sapiens PE=2 SV=1                     | 54.44 | 1 | 1134 |  | 3.3  |
|     | Q66K91 | Small nuclear ribonucleoprotein-associated protein OS=Homo sapiens GN=SNRPB PE=2 SV=1                       | 54.44 | 1 | 1134 |  | 3.3  |
|     | Q5XPV6 | Small nuclear ribonucleoprotein-associated protein OS=Homo sapiens PE=2 SV=1                                | 54.44 | 1 | 1134 |  | 3.3  |
|     | Q53HE7 | Small nuclear ribonucleoprotein-associated protein (Fragment) OS=Homo sapiens PE=2 SV=1                     | 54.44 | 1 | 1134 |  | 3.3  |
|     | Q15182 | Small nuclear ribonucleoprotein-associated protein OS=Homo sapiens GN=SNRPB PE=2 SV=1                       | 54.44 | 1 | 1134 |  | 3.3  |
|     | P63162 | Small nuclear ribonucleoprotein-associated protein N OS=Homo sapiens GN=SNRPN PE=1 SV=1                     | 54.44 | 1 | 1134 |  | 3.3  |
|     | P14678 | Small nuclear ribonucleoprotein-associated proteins B and B~ OS=Homo sapiens GN=SNRPB PE=1 SV=2             | 54.44 | 1 | 1134 |  | 3.3  |
|     | J3QLE5 | Small nuclear ribonucleoprotein-associated protein N (Fragment) OS=Homo sapiens GN=SNRPN PE=4 SV=1          | 54.44 | 1 | 1134 |  | 3.3  |
|     | B4DVS0 | Small nuclear ribonucleoprotein-associated protein OS=Homo sapiens GN=SNRPB PE=2 SV=1                       | 54.44 | 1 | 1134 |  | 3.3  |
| 274 | P33316 | Deoxyuridine 5~-triphosphate nucleotidohydrolase, mitochondrial OS=Homo sapiens GN=DUT PE=1 SV=4            | 54.38 | 1 | 354  |  | 10.0 |
|     | H0YNW5 | Deoxyuridine 5~-triphosphate nucleotidohydrolase, mitochondrial OS=Homo sapiens GN=DUT PE=2 SV=1            | 54.38 | 1 | 354  |  | 10.0 |
|     | H0YKC5 | Deoxyuridine 5~-triphosphate nucleotidohydrolase, mitochondrial (Fragment) OS=Homo sapiens GN=DUT PE=2 SV=1 | 54.38 | 1 | 354  |  | 10.0 |
| 275 | Q14697 | Neutral alpha-glucosidase AB OS=Homo sapiens GN=GANAB PE=1 SV=3                                             | 53.99 | 1 | 944  |  | 2.0  |
|     | F5H6X6 | Neutral alpha-glucosidase AB OS=Homo sapiens GN=GANAB PE=2 SV=1                                             | 53.99 | 1 | 944  |  | 2.0  |
|     | E9PKU7 | Neutral alpha-glucosidase AB OS=Homo sapiens GN=GANAB PE=2 SV=1                                             | 53.99 | 1 | 944  |  | 2.0  |
|     | B4DZ53 | cDNA FLJ59643, highly similar to Neutral alpha-glucosidase AB OS=Homo sapiens PE=2 SV=1                     | 53.99 | 1 | 944  |  | 2.0  |
|     | B4DSM6 | cDNA FLJ54057, highly similar to Neutral alpha-glucosidase AB OS=Homo sapiens PE=2 SV=1                     | 53.99 | 1 | 944  |  | 2.0  |
|     | B4DJ30 | cDNA FLJ61290, highly similar to Neutral alpha-glucosidase AB OS=Homo sapiens PE=2 SV=1                     | 53.99 | 1 | 944  |  | 2.0  |
|     | B4DIW2 | cDNA FLJ54035, highly similar to Neutral alpha-glucosidase AB OS=Homo sapiens PE=2 SV=1                     | 53.99 | 1 | 944  |  | 2.0  |
| 276 | Q13409 | Cytoplasmic dynein 1 intermediate chain 2 OS=Homo sapiens GN=DYNC1I2 PE=1 SV=3                              | 53.79 | 1 | 702  |  | 2.2  |
|     | F8W8S0 | Cytoplasmic dynein 1 intermediate chain 2 OS=Homo sapiens GN=DYNC1I2 PE=2 SV=1                              | 53.79 | 1 | 702  |  | 2.2  |

|     |        |                                                                                                                          |       |   |         |  |      |
|-----|--------|--------------------------------------------------------------------------------------------------------------------------|-------|---|---------|--|------|
|     | B7ZA04 | Cytoplasmic dynein 1 intermediate chain 2 OS=Homo sapiens GN=DYNC1I2 PE=2 SV=1                                           | 53.79 | 1 | 702     |  | 2.2  |
|     | B4DPZ3 | cDNA FLJ53290, highly similar to Cytoplasmic dynein 1 intermediate chain 2 OS=Homo sapiens PE=2 SV=1                     | 53.79 | 1 | 702     |  | 2.2  |
| 277 | B4DLR3 | cDNA FLJ54020, highly similar to Heterogeneous nuclear ribonucleoprotein U OS=Homo sapiens PE=2 SV=1                     | 53.70 | 2 | 84 974  |  | 4.4  |
| 278 | P06703 | Protein S100-A6 OS=Homo sapiens GN=S100A6 PE=1 SV=1                                                                      | 53.43 | 1 | 1216    |  | 8.9  |
| 279 | Q6MZV5 | Putative uncharacterized protein DKFZp686M09245 OS=Homo sapiens GN=DKFZp686M09245 PE=2 SV=1                              | 53.28 | 1 | 567     |  | 2.2  |
|     | P48444 | Coatomer subunit delta OS=Homo sapiens GN=ARCN1 PE=1 SV=1                                                                | 53.28 | 1 | 567     |  | 2.2  |
|     | B0YIW6 | Archain 1, isoform CRA_a OS=Homo sapiens GN=ARCN1 PE=4 SV=1                                                              | 53.28 | 1 | 567     |  | 2.2  |
|     | B0YIW5 | Archain 1, isoform CRA_b OS=Homo sapiens GN=ARCN1 PE=2 SV=1                                                              | 53.28 | 1 | 567     |  | 2.2  |
| 280 | Q68E00 | Putative uncharacterized protein DKFZp686G2045 (Fragment) OS=Homo sapiens GN=DKFZp686G2045 PE=2 SV=2                     | 53.27 | 1 | 1206    |  | 5.1  |
|     | Q16186 | Proteasomal ubiquitin receptor ADRM1 OS=Homo sapiens GN=ADRM1 PE=1 SV=2                                                  | 53.27 | 1 | 1206    |  | 5.1  |
| 281 | Q16527 | Cysteine and glycine-rich protein 2 OS=Homo sapiens GN=CSRP2 PE=1 SV=3                                                   | 53.20 | 1 | 1174    |  | 4.2  |
|     | F8VW96 | Cysteine and glycine-rich protein 2 OS=Homo sapiens GN=CSRP2 PE=2 SV=1                                                   | 53.20 | 1 | 1174    |  | 61.7 |
| 282 | Q86UE4 | Protein LYRIC OS=Homo sapiens GN=MTDH PE=1 SV=2                                                                          | 53.15 | 1 | 335     |  | 1.7  |
|     | E5RJU9 | Protein LYRIC OS=Homo sapiens GN=MTDH PE=2 SV=1                                                                          | 53.15 | 1 | 335     |  | 1.7  |
| 283 | Q9Y4G6 | Talin-2 OS=Homo sapiens GN=TLN2 PE=1 SV=4                                                                                | 53.00 | 1 | 1218    |  | 1.2  |
| 284 | Q96CT7 | Coiled-coil domain-containing protein 124 OS=Homo sapiens GN=CCDC124 PE=1 SV=1                                           | 52.82 | 1 | 1156    |  | 4.5  |
| 285 | P09455 | Retinol-binding protein 1 OS=Homo sapiens GN=RBP1 PE=1 SV=2                                                              | 52.78 | 2 | 668 869 |  | 18.5 |
|     | A8K2Q0 | cDNA FLJ76382, highly similar to Homo sapiens retinol binding protein 1, cellular (RBP1), mRNA OS=Homo sapiens PE=2 SV=1 | 52.78 | 2 | 668 869 |  | 18.5 |
| 286 | Q71UI9 | Histone H2A.V OS=Homo sapiens GN=H2AFV PE=1 SV=3                                                                         | 52.74 | 1 | 624     |  | 1.0  |
|     | C9J0D1 | Histone H2A OS=Homo sapiens GN=H2AFV PE=2 SV=1                                                                           | 52.74 | 1 | 624     |  | 1.0  |
|     | A8MQC5 | Histone H2A OS=Homo sapiens GN=H2AFV PE=2 SV=3                                                                           | 52.74 | 1 | 624     |  | 16.6 |
| 287 | P37108 | Signal recognition particle 14 kDa protein OS=Homo sapiens GN=SRP14 PE=1 SV=2                                            | 52.67 | 1 | 146     |  | 14.8 |
|     | H0YLA2 | Signal recognition particle 14 kDa protein OS=Homo sapiens GN=SRP14 PE=2 SV=1                                            | 52.67 | 1 | 146     |  | 14.8 |
| 288 | P50238 | Cysteine-rich protein 1 OS=Homo sapiens GN=CRIP1 PE=1 SV=3                                                               | 52.54 | 2 | 155 752 |  | 31.2 |
| 289 | P17540 | Creatine kinase S-type, mitochondrial OS=Homo sapiens GN=CKMT2 PE=1 SV=2                                                 | 52.43 | 1 | 408     |  | 5.7  |

|     |        |                                                                                                                                                                                   |       |   |         |  |      |
|-----|--------|-----------------------------------------------------------------------------------------------------------------------------------------------------------------------------------|-------|---|---------|--|------|
|     | B2R8A3 | cDNA, FLJ93805, highly similar to Homo sapiens creatine kinase, mitochondrial 2 (sarcomeric) (CKMT2), nuclear gene encoding mitochondrial protein, mRNA OS=Homo sapiens PE=2 SV=1 | 52.43 | 1 | 408     |  | 5.7  |
| 290 | Q5XKE5 | Keratin, type II cytoskeletal 79 OS=Homo sapiens GN=KRT79 PE=1 SV=2                                                                                                               | 52.28 | 1 | 675     |  | 4.5  |
| 291 | P62807 | Histone H2B type 1-C/E/F/G/I OS=Homo sapiens GN=HIST1H2BC PE=1 SV=4                                                                                                               | 52.07 | 1 | 397     |  | 61.1 |
|     | B2R4S9 | Histone H2B OS=Homo sapiens GN=HIST1H2BF PE=2 SV=1                                                                                                                                | 52.07 | 1 | 397     |  | 61.1 |
| 292 | Q8N4D0 | Carcinoembryonic antigen-related cell adhesion molecule 5 OS=Homo sapiens GN=CEACAM5 PE=2 SV=1                                                                                    | 51.69 | 1 | 849     |  | 5.2  |
|     | Q53G30 | Carcinoembryonic antigen-related cell adhesion molecule 5 variant (Fragment) OS=Homo sapiens PE=2 SV=1                                                                            | 51.69 | 1 | 849     |  | 5.2  |
|     | P06731 | Carcinoembryonic antigen-related cell adhesion molecule 5 OS=Homo sapiens GN=CEACAM5 PE=1 SV=3                                                                                    | 51.69 | 1 | 849     |  | 5.2  |
|     | M0R3J1 | Carcinoembryonic antigen-related cell adhesion molecule 5 (Fragment) OS=Homo sapiens GN=CEACAM5 PE=4 SV=1                                                                         | 51.69 | 1 | 849     |  | 5.2  |
|     | H9KVA7 | Carcinoembryonic antigen-related cell adhesion molecule 5 OS=Homo sapiens GN=CEACAM5 PE=4 SV=2                                                                                    | 51.69 | 1 | 849     |  | 5.2  |
| 293 | P13647 | Keratin, type II cytoskeletal 5 OS=Homo sapiens GN=KRT5 PE=1 SV=3                                                                                                                 | 51.56 | 1 | 64      |  | 4.2  |
| 294 | P62269 | 40S ribosomal protein S18 OS=Homo sapiens GN=RPS18 PE=1 SV=3                                                                                                                      | 51.35 | 1 | 1026    |  | 61.7 |
| 295 | Q9UPN4 | 5-azacytidine-induced protein 1 OS=Homo sapiens GN=AZI1 PE=1 SV=3                                                                                                                 | 51.34 | 2 | 960 986 |  | 3.6  |
|     | I3L2J8 | 5-azacytidine-induced protein 1 OS=Homo sapiens GN=AZI1 PE=2 SV=1                                                                                                                 | 51.34 | 2 | 960 986 |  | 3.6  |
|     | B2RN10 | 5-azacytidine induced 1 OS=Homo sapiens GN=AZI1 PE=2 SV=1                                                                                                                         | 51.34 | 2 | 960 986 |  | 3.6  |

**UniProt  
Human  
Protein  
IDs,  
cont.**

| Gr<br>p<br>Nr. | Accession<br>Number | Protein Name                                                               | Protein<br>Score | Unique<br>PSMs | PSM Serial Nrs. | Other<br>Grp. | %<br>Seq.<br>Covr. |
|----------------|---------------------|----------------------------------------------------------------------------|------------------|----------------|-----------------|---------------|--------------------|
| 296            | Q9UKE5              | TRAF2 and NCK-interacting protein kinase OS=Homo sapiens GN=TNIK PE=1 SV=1 | 50.98            | 1              | 590             |               | 3.7                |
|                | F5H865              | TRAF2 and NCK-interacting protein kinase OS=Homo sapiens GN=TNIK PE=2 SV=1 | 50.98            | 1              | 590             |               | 3.7                |

|     |        |                                                                                                               |       |   |      |  |      |
|-----|--------|---------------------------------------------------------------------------------------------------------------|-------|---|------|--|------|
|     | F5H5M9 | TRAF2 and NCK-interacting protein kinase OS=Homo sapiens<br>GN=TNIK PE=2 SV=1                                 | 50.98 | 1 | 590  |  | 3.7  |
| 297 | Q15637 | Splicing factor 1 OS=Homo sapiens GN=SF1 PE=1 SV=4                                                            | 50.98 | 1 | 818  |  | 1.6  |
|     | B4DX42 | Splicing factor 1 OS=Homo sapiens GN=SF1 PE=2 SV=1                                                            | 50.98 | 1 | 818  |  | 1.6  |
|     | B4DSE4 | cDNA FLJ54056, highly similar to Splicing factor 1 OS=Homo sapiens PE=2 SV=1                                  | 50.98 | 1 | 818  |  | 1.6  |
|     | B4DJU4 | cDNA FLJ53344, highly similar to Splicing factor 1 OS=Homo sapiens PE=2 SV=1                                  | 50.98 | 1 | 818  |  | 1.6  |
| 298 | O00533 | Neural cell adhesion molecule L1-like protein OS=Homo sapiens<br>GN=CHL1 PE=1 SV=4                            | 50.80 | 1 | 1137 |  | 3.4  |
| 299 | Q9Y6E0 | Serine/threonine-protein kinase 24 OS=Homo sapiens<br>GN=STK24 PE=1 SV=1                                      | 50.70 | 1 | 691  |  | 5.8  |
|     | Q6P0Y1 | Serine/threonine kinase 24 (STE20 homolog, yeast)<br>OS=Homo sapiens GN=STK24 PE=2 SV=1                       | 50.70 | 1 | 691  |  | 5.8  |
|     | Q6FG81 | STK24 protein (Fragment) OS=Homo sapiens GN=STK24<br>PE=2 SV=1                                                | 50.70 | 1 | 691  |  | 5.8  |
|     | Q5U0E6 | Serine/threonine kinase 24 (STE20 homolog, yeast)<br>OS=Homo sapiens GN=STK24 PE=2 SV=1                       | 50.70 | 1 | 691  |  | 5.8  |
|     | B4DT57 | cDNA FLJ61383, highly similar to Serine/threonine-protein kinase 24 (EC 2.7.11.1) OS=Homo sapiens PE=2 SV=1   | 50.70 | 1 | 691  |  | 5.8  |
|     | B4DR80 | Serine/threonine-protein kinase 24 12 kDa subunit OS=Homo sapiens<br>GN=STK24 PE=2 SV=1                       | 50.70 | 1 | 691  |  | 5.8  |
| 300 | E7ERI3 | Threonine--tRNA ligase, cytoplasmic OS=Homo sapiens<br>GN=TARS PE=2 SV=1                                      | 50.55 | 1 | 844  |  | 2.8  |
|     | B4DKZ9 | cDNA FLJ55705, highly similar to Threonyl-tRNA synthetase, cytoplasmic (EC 6.1.1.3) OS=Homo sapiens PE=2 SV=1 | 50.55 | 1 | 844  |  | 2.8  |
| 301 | Q6FHV6 | ENO2 protein OS=Homo sapiens GN=ENO2 PE=2 SV=1                                                                | 50.22 | 1 | 70   |  | 9.8  |
|     | P09104 | Gamma-enolase OS=Homo sapiens GN=ENO2 PE=1 SV=3                                                               | 50.22 | 1 | 70   |  | 9.8  |
|     | F5H0C8 | Enolase OS=Homo sapiens GN=ENO2 PE=2 SV=1                                                                     | 50.22 | 1 | 70   |  | 9.8  |
|     | B7Z2X9 | Enolase OS=Homo sapiens GN=ENO2 PE=2 SV=1                                                                     | 50.22 | 1 | 70   |  | 9.8  |
|     | A8K3B0 | cDNA FLJ77877, highly similar to Human ENO2 neuron specific (gamma) enolase OS=Homo sapiens PE=2 SV=1         | 50.22 | 1 | 70   |  | 9.8  |
| 302 | P69905 | Hemoglobin subunit alpha OS=Homo sapiens GN=HBA1<br>PE=1 SV=2                                                 | 49.94 | 1 | 839  |  | 26.8 |
|     | I1VZV6 | Hemoglobin alpha 1 OS=Homo sapiens GN=HBA1 PE=3<br>SV=1                                                       | 49.94 | 1 | 839  |  | 26.8 |
|     | E9M4D4 | Hemoglobin alpha-1 globin chain (Fragment) OS=Homo sapiens<br>GN=HBA1 PE=3 SV=1                               | 49.94 | 1 | 839  |  | 26.8 |
|     | E1B2D1 | Hemoglobin alpha-1 globin chain variant (Fragment)<br>OS=Homo sapiens GN=HBA1 PE=3 SV=1                       | 49.94 | 1 | 839  |  | 26.8 |
|     | D1MGQ2 | Alpha-2 globin chain OS=Homo sapiens GN=HBA2 PE=2<br>SV=1                                                     | 49.94 | 1 | 839  |  | 26.8 |
| 303 | Q13573 | SNW domain-containing protein 1 OS=Homo sapiens<br>GN=SNW1 PE=1 SV=1                                          | 49.72 | 1 | 41   |  | 6.8  |

|     |        |                                                                                                                                     |       |   |          |  |      |
|-----|--------|-------------------------------------------------------------------------------------------------------------------------------------|-------|---|----------|--|------|
|     | G3V3A4 | SNW domain-containing protein 1 OS=Homo sapiens<br>GN=SNW1 PE=2 SV=1                                                                | 49.72 | 1 | 41       |  | 6.8  |
|     | B7Z9X2 | cDNA, FLJ78986, highly similar to SNW domain-containing<br>protein 1 OS=Homo sapiens PE=2 SV=1                                      | 49.72 | 1 | 41       |  | 6.8  |
|     | B4DY36 | cDNA FLJ51388, highly similar to SNW domain-containing<br>protein 1 OS=Homo sapiens PE=2 SV=1                                       | 49.72 | 1 | 41       |  | 6.8  |
| 304 | P13521 | Secretogranin-2 OS=Homo sapiens GN=SCG2 PE=1 SV=2                                                                                   | 49.23 | 1 | 840      |  | 4.4  |
|     | B4DQJ6 | cDNA FLJ51276, highly similar to Secretogranin-2 OS=Homo<br>sapiens PE=2 SV=1                                                       | 49.23 | 1 | 840      |  | 4.4  |
| 305 | P55209 | Nucleosome assembly protein 1-like 1 OS=Homo sapiens<br>GN=NAP1L1 PE=1 SV=1                                                         | 49.19 | 2 | 574 1187 |  | 13.0 |
|     | H0YIV4 | Nucleosome assembly protein 1-like 1 (Fragment) OS=Homo<br>sapiens GN=NAP1L1 PE=2 SV=1                                              | 49.19 | 2 | 574 1187 |  | 13.0 |
|     | H0YHC3 | Nucleosome assembly protein 1-like 1 (Fragment) OS=Homo<br>sapiens GN=NAP1L1 PE=2 SV=1                                              | 49.19 | 2 | 574 1187 |  | 13.0 |
|     | H0YH88 | Nucleosome assembly protein 1-like 1 (Fragment) OS=Homo<br>sapiens GN=NAP1L1 PE=3 SV=1                                              | 49.19 | 2 | 574 1187 |  | 13.0 |
|     | F8W543 | Nucleosome assembly protein 1-like 1 OS=Homo sapiens<br>GN=NAP1L1 PE=2 SV=1                                                         | 49.19 | 2 | 574 1187 |  | 13.0 |
|     | F8W118 | Nucleosome assembly protein 1-like 1 (Fragment) OS=Homo<br>sapiens GN=NAP1L1 PE=2 SV=1                                              | 49.19 | 2 | 574 1187 |  | 13.0 |
|     | F8W0J6 | Nucleosome assembly protein 1-like 1 OS=Homo sapiens<br>GN=NAP1L1 PE=2 SV=1                                                         | 49.19 | 2 | 574 1187 |  | 13.0 |
|     | F8W020 | Nucleosome assembly protein 1-like 1 (Fragment) OS=Homo<br>sapiens GN=NAP1L1 PE=2 SV=1                                              | 49.19 | 2 | 574 1187 |  | 13.0 |
|     | F8VY35 | Nucleosome assembly protein 1-like 1 (Fragment) OS=Homo<br>sapiens GN=NAP1L1 PE=2 SV=1                                              | 49.19 | 2 | 574 1187 |  | 13.0 |
|     | F8VVB5 | Nucleosome assembly protein 1-like 1 (Fragment) OS=Homo<br>sapiens GN=NAP1L1 PE=2 SV=1                                              | 49.19 | 2 | 574 1187 |  | 13.0 |
| 306 | Q13242 | Serine/arginine-rich splicing factor 9 OS=Homo sapiens<br>GN=SRSF9 PE=1 SV=1                                                        | 48.74 | 2 | 99 416   |  | 12.0 |
|     | B4DFT9 | cDNA FLJ56571, highly similar to Splicing factor, arginine/<br>serine-rich 9 OS=Homo sapiens PE=2 SV=1                              | 48.74 | 2 | 99 416   |  | 12.0 |
|     | A8K3M9 | cDNA FLJ76387, highly similar to Homo sapiens splicing<br>factor, arginine/serine-rich 9 (SFRS9), mRNA OS=Homo<br>sapiens PE=2 SV=1 | 48.74 | 2 | 99 416   |  | 12.0 |
| 307 | Q12904 | Aminoacyl tRNA synthase complex-interacting multifunctional<br>protein 1 OS=Homo sapiens GN=AIMP1 PE=1 SV=2                         | 48.47 | 1 | 1078     |  | 2.6  |
| 308 | P62316 | Small nuclear ribonucleoprotein Sm D2 OS=Homo sapiens<br>GN=SNRPD2 PE=1 SV=1                                                        | 48.29 | 1 | 1118     |  | 12.8 |
|     | K7ERG4 | Small nuclear ribonucleoprotein Sm D2 OS=Homo sapiens<br>GN=SNRPD2 PE=4 SV=1                                                        | 48.29 | 1 | 1118     |  | 12.8 |
| 309 | Q3MHD2 | Protein LSM12 homolog OS=Homo sapiens GN=LSM12 PE=1<br>SV=2                                                                         | 48.05 | 1 | 538      |  | 7.2  |
|     | B4DUG4 | cDNA FLJ51308 OS=Homo sapiens PE=4 SV=1                                                                                             | 48.05 | 1 | 538      |  | 7.2  |



|     |        |                                                                                          |       |   |      |  |      |
|-----|--------|------------------------------------------------------------------------------------------|-------|---|------|--|------|
| 310 | B7Z351 | cDNA FLJ54682, highly similar to Osteopontin OS=Homo sapiens PE=2 SV=1                   | 47.99 | 1 | 655  |  | 13.5 |
| 311 | Q9BZM5 | NKG2D ligand 2 OS=Homo sapiens GN=ULBP2 PE=1 SV=1                                        | 47.88 | 1 | 707  |  | 4.9  |
|     | Q8IZX9 | NKG2D ligand 2 (Fragment) OS=Homo sapiens PE=2 SV=1                                      | 47.88 | 1 | 707  |  | 4.9  |
|     | Q6H3X3 | Retinoic acid early transcript 1G protein OS=Homo sapiens GN=RAET1G PE=1 SV=1            | 47.88 | 1 | 707  |  | 4.9  |
|     | Q5VY80 | Retinoic acid early transcript 1L protein OS=Homo sapiens GN=RAET1L PE=2 SV=1            | 47.88 | 1 | 707  |  | 4.9  |
|     | Q4V9S8 | Retinoic acid early transcript 1G OS=Homo sapiens GN=RAET1G PE=2 SV=1                    | 47.88 | 1 | 707  |  | 4.9  |
|     | J7HHH7 | Retinoic acid early transcript 1H (Fragment) OS=Homo sapiens GN=RAET1L PE=4 SV=1         | 47.88 | 1 | 707  |  | 4.9  |
|     | J7HHG3 | Retinoic acid early transcript 1G (Fragment) OS=Homo sapiens GN=RAET1G PE=4 SV=1         | 47.88 | 1 | 707  |  | 4.9  |
|     | J7HEN7 | Retinoic acid early transcript 1L (Fragment) OS=Homo sapiens GN=RAET1L PE=4 SV=1         | 47.88 | 1 | 707  |  | 4.9  |
|     | J7HEM2 | Retinoic acid early transcript 1G (Fragment) OS=Homo sapiens GN=RAET1G PE=4 SV=1         | 47.88 | 1 | 707  |  | 4.9  |
|     | J7HBD2 | Retinoic acid early transcript 1L (Fragment) OS=Homo sapiens GN=RAET1L PE=4 SV=1         | 47.88 | 1 | 707  |  | 4.9  |
| 312 | Q6FG59 | CDC37 protein OS=Homo sapiens GN=CDC37 PE=2 SV=1                                         | 47.86 | 1 | 645  |  | 5.8  |
|     | Q16543 | Hsp90 co-chaperone Cdc37 OS=Homo sapiens GN=CDC37 PE=1 SV=1                              | 47.86 | 1 | 645  |  | 5.8  |
|     | K7EQA9 | Hsp90 co-chaperone Cdc37 (Fragment) OS=Homo sapiens GN=CDC37 PE=4 SV=1                   | 47.86 | 1 | 645  |  | 5.8  |
|     | K7EKQ2 | Hsp90 co-chaperone Cdc37 (Fragment) OS=Homo sapiens GN=CDC37 PE=4 SV=1                   | 47.86 | 1 | 645  |  | 5.8  |
| 313 | Q96IF9 | VCP protein (Fragment) OS=Homo sapiens GN=VCP PE=2 SV=2                                  | 47.22 | 1 | 584  |  | 6.7  |
|     | P55072 | Transitional endoplasmic reticulum ATPase OS=Homo sapiens GN=VCP PE=1 SV=4               | 47.22 | 1 | 584  |  | 6.7  |
| 314 | B4DFW2 | Metalloproteinase inhibitor 2 OS=Homo sapiens GN=TIMP2 PE=2 SV=1                         | 47.21 | 1 | 987  |  | 3.6  |
| 315 | P25705 | ATP synthase subunit alpha, mitochondrial OS=Homo sapiens GN=ATP5A1 PE=1 SV=1            | 47.20 | 1 | 1079 |  | 4.0  |
|     | K7ENP3 | ATP synthase subunit alpha OS=Homo sapiens GN=ATP5A1 PE=3 SV=1                           | 47.20 | 1 | 1079 |  | 4.0  |
|     | K7ENJ4 | ATP synthase subunit alpha, mitochondrial (Fragment) OS=Homo sapiens GN=ATP5A1 PE=4 SV=1 | 47.20 | 1 | 1079 |  | 4.0  |
|     | K7EK77 | ATP synthase subunit alpha, mitochondrial (Fragment) OS=Homo sapiens GN=ATP5A1 PE=3 SV=1 | 47.20 | 1 | 1079 |  | 4.0  |
|     | K7EK63 | ATP synthase subunit alpha OS=Homo sapiens GN=ATP5A1 PE=3 SV=1                           | 47.20 | 1 | 1079 |  | 4.0  |
|     | B4DY56 | ATP synthase subunit alpha OS=Homo sapiens PE=2 SV=1                                     | 47.20 | 1 | 1079 |  | 4.0  |
| 316 | K7EJP1 | ATP synthase subunit alpha, mitochondrial (Fragment) OS=Homo sapiens GN=ATP5A1 PE=4 SV=1 | 47.20 | 1 | 1066 |  | 5.8  |

|     |        |                                                                                                                                                                                                     |       |   |      |  |      |
|-----|--------|-----------------------------------------------------------------------------------------------------------------------------------------------------------------------------------------------------|-------|---|------|--|------|
| 317 | Q9Y3E8 | CGI-150 protein OS=Homo sapiens GN=C17orf25 PE=2 SV=1                                                                                                                                               | 47.07 | 1 | 316  |  | 4.5  |
|     | Q9HC38 | Glyoxalase domain-containing protein 4 OS=Homo sapiens GN=GLOD4 PE=1 SV=1                                                                                                                           | 47.07 | 1 | 316  |  | 4.5  |
|     | I3L3Q4 | Glyoxalase domain-containing protein 4 (Fragment) OS=Homo sapiens GN=GLOD4 PE=2 SV=1                                                                                                                | 47.07 | 1 | 316  |  | 4.5  |
|     | B7Z403 | Glyoxalase domain-containing protein 4 OS=Homo sapiens GN=GLOD4 PE=2 SV=1                                                                                                                           | 47.07 | 1 | 316  |  | 4.5  |
|     | B4DX01 | cDNA FLJ59092 OS=Homo sapiens PE=2 SV=1                                                                                                                                                             | 47.07 | 1 | 316  |  | 4.5  |
|     | B3KV49 | cDNA FLJ16128 fis, clone BRACE2038269, moderately similar to Bombyx mori cytosolic juvenile hormone binding protein 36 kDa subunit (cJHBP) mRNA OS=Homo sapiens PE=2 SV=1                           | 47.07 | 1 | 316  |  | 4.5  |
|     | A8K8F0 | cDNA FLJ76436 OS=Homo sapiens PE=2 SV=1                                                                                                                                                             | 47.07 | 1 | 316  |  | 4.5  |
| 318 | M0QYQ9 | Splicing factor U2AF 65 kDa subunit (Fragment) OS=Homo sapiens GN=U2AF2 PE=4 SV=1                                                                                                                   | 47.03 | 1 | 383  |  | 15.7 |
| 319 | Q9H7G6 | cDNA: FLJ20897 fis, clone ADKA03573 OS=Homo sapiens PE=2 SV=1                                                                                                                                       | 46.64 | 1 | 134  |  | 34.8 |
|     | Q71RH4 | FP1047 OS=Homo sapiens PE=2 SV=1                                                                                                                                                                    | 46.64 | 1 | 134  |  | 36.8 |
|     | E9PRY8 | Elongation factor 1-delta OS=Homo sapiens GN=EEF1D PE=2 SV=1                                                                                                                                        | 46.64 | 1 | 134  |  | 1.7  |
|     | D3DWK1 | Eukaryotic translation elongation factor 1 delta (Guanine nucleotide exchange protein), isoform CRA_b OS=Homo sapiens GN=EEF1D PE=3 SV=1                                                            | 46.64 | 1 | 134  |  | 1.7  |
|     | B2RAR6 | cDNA, FLJ95068, highly similar to Homo sapiens eukaryotic translation elongation factor 1 delta (guanine nucleotide exchange protein) (EEF1D), transcript variant 1, mRNA OS=Homo sapiens PE=2 SV=1 | 46.64 | 1 | 134  |  | 1.7  |
| 320 | Q5T8U3 | 60S ribosomal protein L7a (Fragment) OS=Homo sapiens GN=RPL7A PE=4 SV=1                                                                                                                             | 46.57 | 1 | 1160 |  | 12.0 |
|     | P62424 | 60S ribosomal protein L7a OS=Homo sapiens GN=RPL7A PE=1 SV=2                                                                                                                                        | 46.57 | 1 | 1160 |  | 12.0 |
| 321 | P60660 | Myosin light polypeptide 6 OS=Homo sapiens GN=MYL6 PE=1 SV=2                                                                                                                                        | 46.49 | 1 | 694  |  | 23.0 |
|     | J3KND3 | Myosin light polypeptide 6 OS=Homo sapiens GN=MYL6 PE=4 SV=1                                                                                                                                        | 46.49 | 1 | 694  |  | 23.0 |
|     | G8JLA2 | Myosin light polypeptide 6 OS=Homo sapiens GN=MYL6 PE=2 SV=1                                                                                                                                        | 46.49 | 1 | 694  |  | 23.0 |
|     | G3V1V0 | Myosin light polypeptide 6 OS=Homo sapiens GN=MYL6 PE=4 SV=1                                                                                                                                        | 46.49 | 1 | 694  |  | 23.0 |
|     | F8W1R7 | Myosin light polypeptide 6 OS=Homo sapiens GN=MYL6 PE=2 SV=1                                                                                                                                        | 46.49 | 1 | 694  |  | 23.0 |
|     | F8VZV5 | Myosin light polypeptide 6 OS=Homo sapiens GN=MYL6 PE=2 SV=1                                                                                                                                        | 46.49 | 1 | 694  |  | 23.0 |
|     | B7Z6Z4 | Myosin light polypeptide 6 OS=Homo sapiens GN=MYL6 PE=2 SV=1                                                                                                                                        | 46.49 | 1 | 694  |  | 23.0 |

|     |        |                                                                                                       |       |   |         |  |      |
|-----|--------|-------------------------------------------------------------------------------------------------------|-------|---|---------|--|------|
| 322 | P33240 | Cleavage stimulation factor subunit 2 OS=Homo sapiens GN=CSTF2 PE=1 SV=1                              | 46.20 | 1 | 212     |  | 1.8  |
|     | E9PID8 | Cleavage stimulation factor subunit 2 OS=Homo sapiens GN=CSTF2 PE=2 SV=1                              | 46.20 | 1 | 212     |  | 1.8  |
|     | E7EWR4 | Cleavage stimulation factor subunit 2 OS=Homo sapiens GN=CSTF2 PE=2 SV=1                              | 46.20 | 1 | 212     |  | 1.8  |
|     | B4DUD5 | cDNA FLJ58787, highly similar to Cleavage stimulation factor 64 kDa subunit OS=Homo sapiens PE=2 SV=1 | 46.20 | 1 | 212     |  | 1.8  |
|     | B3V096 | BetaCstF-64 variant 2 OS=Homo sapiens GN=CSTF2 PE=2 SV=1                                              | 46.20 | 1 | 212     |  | 1.8  |
| 323 | P25786 | Proteasome subunit alpha type-1 OS=Homo sapiens GN=PSMA1 PE=1 SV=1                                    | 46.03 | 2 | 615 877 |  | 8.8  |
|     | F5GX11 | Proteasome subunit alpha type-1 OS=Homo sapiens GN=PSMA1 PE=2 SV=1                                    | 46.03 | 2 | 615 877 |  | 8.8  |
| 324 | P23528 | Cofilin-1 OS=Homo sapiens GN=CFL1 PE=1 SV=3                                                           | 45.99 | 1 | 630     |  | 32.9 |
|     | G3V1A4 | Cofilin 1 (Non-muscle), isoform CRA_a OS=Homo sapiens GN=CFL1 PE=4 SV=1                               | 45.99 | 1 | 630     |  | 32.9 |
|     | E9PP50 | Cofilin-1 (Fragment) OS=Homo sapiens GN=CFL1 PE=2 SV=1                                                | 45.99 | 1 | 630     |  | 32.9 |
|     | E9PK25 | Cofilin-1 OS=Homo sapiens GN=CFL1 PE=2 SV=1                                                           | 45.99 | 1 | 630     |  | 32.9 |
| 325 | Q6IQ49 | Protein SDE2 homolog OS=Homo sapiens GN=SDE2 PE=1 SV=1                                                | 45.82 | 1 | 221     |  | 2.0  |

**UniProt  
Human  
Protein  
IDs,  
cont.**

| Gr<br>p<br>Nr. | Accessio<br>n<br>Number | Protein Name                                                                                                                                                  | Prote<br>in<br>Scor<br>e | Uniqu<br>e<br>PSMs | PSM Serial Nrs. | Oth<br>er<br>Grp. | %<br>Seq.<br>Cove<br>r. |
|----------------|-------------------------|---------------------------------------------------------------------------------------------------------------------------------------------------------------|--------------------------|--------------------|-----------------|-------------------|-------------------------|
| 326            | Q3KQZ8                  | EPRS protein (Fragment) OS=Homo sapiens GN=EPRS PE=2 SV=1                                                                                                     | 45.74                    | 1                  | 569             |                   | 0.9                     |
|                | P07814                  | Bifunctional glutamate/proline--tRNA ligase OS=Homo sapiens GN=EPRS PE=1 SV=5                                                                                 | 45.74                    | 1                  | 569             |                   | 0.9                     |
|                | H6WCP5                  | EPRSN1 OS=Homo sapiens PE=2 SV=1                                                                                                                              | 45.74                    | 1                  | 569             |                   | 0.9                     |
|                | B4DKX5                  | cDNA FLJ56021, highly similar to Bifunctional aminoacyl-tRNA synthetase[Includes: Glutamyl-tRNA synthetase (EC 6.1.1.17) (Fragment) OS=Homo sapiens PE=2 SV=1 | 45.74                    | 1                  | 569             |                   | 0.9                     |
| 327            | P02790                  | Hemopexin OS=Homo sapiens GN=HPX PE=1 SV=2                                                                                                                    | 45.39                    | 1                  | 1007            |                   | 4.1                     |
| 328            | Q9H299                  | SH3 domain-binding glutamic acid-rich-like protein 3 OS=Homo sapiens GN=SH3BGRL3 PE=1 SV=1                                                                    | 45.38                    | 1                  | 302             |                   | 3.9                     |

|     |        |                                                                                                                            |       |   |      |  |      |
|-----|--------|----------------------------------------------------------------------------------------------------------------------------|-------|---|------|--|------|
|     | Q86Z22 | Putative uncharacterized protein OS=Homo sapiens PE=2 SV=1                                                                 | 45.38 | 1 | 302  |  | 3.9  |
|     | Q5T123 | SH3 domain-binding glutamic acid-rich-like protein 3 OS=Homo sapiens GN=SH3BGRL3 PE=2 SV=1                                 | 45.38 | 1 | 302  |  | 3.9  |
|     | D3DPK5 | SH3 domain binding glutamic acid-rich protein like 3, isoform CRA_a (Fragment) OS=Homo sapiens GN=SH3BGRL3 PE=2 SV=1       | 45.38 | 1 | 302  |  | 3.9  |
| 329 | Q6FGX5 | TIMP metalloproteinase inhibitor 1, isoform CRA_a OS=Homo sapiens GN=TIMP1 PE=2 SV=1                                       | 45.34 | 1 | 270  |  | 6.7  |
|     | Q5H9A7 | Metalloproteinase inhibitor 1 OS=Homo sapiens GN=TIMP1 PE=2 SV=1                                                           | 45.34 | 1 | 270  |  | 6.7  |
|     | P01033 | Metalloproteinase inhibitor 1 OS=Homo sapiens GN=TIMP1 PE=1 SV=1                                                           | 45.34 | 1 | 270  |  | 6.7  |
|     | H0Y789 | Metalloproteinase inhibitor 1 (Fragment) OS=Homo sapiens GN=TIMP1 PE=4 SV=1                                                | 45.34 | 1 | 270  |  | 6.7  |
|     | B3KQF4 | cDNA FLJ90373 fis, clone NT2RP2004606, highly similar to Metalloproteinase inhibitor 1 OS=Homo sapiens PE=2 SV=1           | 45.34 | 1 | 270  |  | 6.7  |
| 330 | O00115 | Deoxyribonuclease-2-alpha OS=Homo sapiens GN=DNASE2 PE=1 SV=2                                                              | 44.93 | 1 | 880  |  | 5.5  |
|     | K7ENE5 | Deoxyribonuclease-2-alpha (Fragment) OS=Homo sapiens GN=DNASE2 PE=4 SV=1                                                   | 44.93 | 1 | 880  |  | 5.5  |
|     | C0LQF2 | Deoxyribonuclease II (Fragment) OS=Homo sapiens PE=2 SV=1                                                                  | 44.93 | 1 | 880  |  | 5.5  |
|     | B7Z4K6 | Deoxyribonuclease-2-alpha OS=Homo sapiens GN=DNASE2 PE=2 SV=1                                                              | 44.93 | 1 | 880  |  | 5.5  |
|     | B3KQS9 | cDNA PSEC0141 fis, clone PLACE1005913, highly similar to Deoxyribonuclease-2-alpha (EC 3.1.22.1) OS=Homo sapiens PE=2 SV=1 | 44.93 | 1 | 880  |  | 5.5  |
| 331 | P05455 | Lupus La protein OS=Homo sapiens GN=SSB PE=1 SV=2                                                                          | 44.91 | 1 | 1103 |  | 10.8 |
|     | B5BUB5 | Autoantigen La (Fragment) OS=Homo sapiens GN=SSB PE=2 SV=1                                                                 | 44.91 | 1 | 1103 |  | 10.8 |
| 332 | Q05639 | Elongation factor 1-alpha 2 OS=Homo sapiens GN=EEF1A2 PE=1 SV=1                                                            | 44.87 | 1 | 905  |  | 5.8  |
| 333 | Q71UA6 | Neutral amino acid transporter OS=Homo sapiens GN=SLC1A5 PE=2 SV=1                                                         | 44.74 | 1 | 556  |  | 2.7  |
|     | Q59ES3 | Solute carrier family 1 (Neutral amino acid transporter), member 5 variant (Fragment) OS=Homo sapiens PE=2 SV=1            | 44.74 | 1 | 556  |  | 2.7  |
|     | Q15758 | Neutral amino acid transporter B(0) OS=Homo sapiens GN=SLC1A5 PE=1 SV=2                                                    | 44.74 | 1 | 556  |  | 2.7  |
|     | M0QXM4 | Neutral amino acid transporter B(0) OS=Homo sapiens GN=SLC1A5 PE=4 SV=1                                                    | 44.74 | 1 | 556  |  | 2.7  |
|     | E9PC01 | Neutral amino acid transporter B(0) OS=Homo sapiens GN=SLC1A5 PE=2 SV=1                                                    | 44.74 | 1 | 556  |  | 2.7  |
|     | B7ZB81 | cDNA, FLJ79445, highly similar to Neutral amino acid transporter B(0) OS=Homo sapiens PE=2 SV=1                            | 44.74 | 1 | 556  |  | 2.7  |

|     |        |                                                                                                                    |       |   |     |  |      |
|-----|--------|--------------------------------------------------------------------------------------------------------------------|-------|---|-----|--|------|
|     | B4DWS4 | Neutral amino acid transporter B(0) OS=Homo sapiens<br>GN=SLC1A5 PE=2 SV=1                                         | 44.74 | 1 | 556 |  | 2.7  |
|     | B4DR77 | cDNA FLJ58403, highly similar to Neutral amino acid<br>transporter B(0) OS=Homo sapiens PE=2 SV=1                  | 44.74 | 1 | 556 |  | 2.7  |
|     | B4DE27 | cDNA FLJ58765, highly similar to Neutral amino acid<br>transporter B(0) OS=Homo sapiens PE=2 SV=1                  | 44.74 | 1 | 556 |  | 2.7  |
| 334 | Q9BXP5 | Serrate RNA effector molecule homolog OS=Homo sapiens<br>GN=SRRT PE=1 SV=1                                         | 44.48 | 1 | 74  |  | 24.2 |
| 335 | J3KNE3 | Platelet-activating factor acetylhydrolase IB subunit beta<br>(Fragment) OS=Homo sapiens GN=PFAFH1B2 PE=4 SV=1     | 44.36 | 1 | 274 |  | 10.3 |
| 336 | P62826 | GTP-binding nuclear protein Ran OS=Homo sapiens GN=RAN<br>PE=1 SV=3                                                | 44.32 | 1 | 664 |  | 4.3  |
|     | J3KQE5 | GTP-binding nuclear protein Ran (Fragment) OS=Homo<br>sapiens GN=RAN PE=4 SV=1                                     | 44.32 | 1 | 664 |  | 4.3  |
|     | F5H018 | GTP-binding nuclear protein Ran (Fragment) OS=Homo<br>sapiens GN=RAN PE=2 SV=1                                     | 44.32 | 1 | 664 |  | 4.3  |
|     | B5MDF5 | GTP-binding nuclear protein Ran OS=Homo sapiens GN=RAN<br>PE=4 SV=1                                                | 44.32 | 1 | 664 |  | 4.3  |
|     | B4DV51 | GTP-binding nuclear protein Ran OS=Homo sapiens GN=RAN<br>PE=2 SV=1                                                | 44.32 | 1 | 664 |  | 4.3  |
| 337 | P09382 | Galectin-1 OS=Homo sapiens GN=LGALS1 PE=1 SV=2                                                                     | 44.07 | 1 | 36  |  | 7.4  |
| 338 | Q86Y82 | Syntaxin-12 OS=Homo sapiens GN=STX12 PE=1 SV=1                                                                     | 43.85 | 1 | 144 |  | 8.5  |
|     | Q6LEU0 | STX12 protein (Fragment) OS=Homo sapiens GN=STX12<br>PE=2 SV=1                                                     | 43.85 | 1 | 144 |  | 8.5  |
|     | B1AJQ6 | Syntaxin-12 (Fragment) OS=Homo sapiens GN=STX12 PE=4<br>SV=1                                                       | 43.85 | 1 | 144 |  | 8.5  |
| 339 | Q8NFU3 | Thiosulfate sulfurtransferase/rhodanese-like domain-<br>containing protein 1 OS=Homo sapiens GN=TSTD1 PE=1<br>SV=3 | 43.84 | 1 | 922 |  | 7.8  |
| 340 | Q9NXZ6 | BMP and activin membrane-bound inhibitor homolog<br>OS=Homo sapiens GN=nma PE=2 SV=1                               | 43.80 | 1 | 253 |  | 3.5  |
|     | Q53G66 | BMP and activin membrane-bound inhibitor homolog<br>(Fragment) OS=Homo sapiens PE=2 SV=1                           | 43.80 | 1 | 253 |  | 3.5  |
|     | Q13145 | BMP and activin membrane-bound inhibitor homolog<br>OS=Homo sapiens GN=BAMBI PE=1 SV=1                             | 43.80 | 1 | 253 |  | 3.5  |
|     | A8K3M4 | BMP and activin membrane-bound inhibitor homolog<br>OS=Homo sapiens PE=2 SV=1                                      | 43.80 | 1 | 253 |  | 3.5  |
| 341 | Q9UKM9 | RNA-binding protein Raly OS=Homo sapiens GN=RALY PE=1<br>SV=1                                                      | 43.73 | 1 | 640 |  | 9.5  |
|     | Q5QPM2 | RNA-binding protein Raly (Fragment) OS=Homo sapiens<br>GN=RALY PE=4 SV=1                                           | 43.73 | 1 | 640 |  | 9.5  |
|     | Q5QPM1 | RNA-binding protein Raly (Fragment) OS=Homo sapiens<br>GN=RALY PE=4 SV=1                                           | 43.73 | 1 | 640 |  | 9.5  |
|     | Q5QPM0 | RNA-binding protein Raly (Fragment) OS=Homo sapiens<br>GN=RALY PE=4 SV=1                                           | 43.73 | 1 | 640 |  | 9.5  |

|     |        |                                                                                                                                                  |       |   |     |  |     |
|-----|--------|--------------------------------------------------------------------------------------------------------------------------------------------------|-------|---|-----|--|-----|
|     | Q5QPL9 | RNA-binding protein Raly (Fragment) OS=Homo sapiens<br>GN=RALY PE=4 SV=1                                                                         | 43.73 | 1 | 640 |  | 9.5 |
|     | Q53GL6 | RNA binding protein (Autoantigenic, hnRNP-associated with<br>lethal yellow) long isoform variant (Fragment) OS=Homo<br>sapiens GN=RALY PE=2 SV=1 | 43.73 | 1 | 640 |  | 9.5 |
|     | B4DSJ1 | cDNA FLJ56677, highly similar to RNA-binding protein Raly<br>OS=Homo sapiens PE=2 SV=1                                                           | 43.73 | 1 | 640 |  | 9.5 |
|     | A8K4T9 | cDNA FLJ77421, highly similar to Homo sapiens autoantigen<br>p542 mRNA OS=Homo sapiens PE=2 SV=1                                                 | 43.73 | 1 | 640 |  | 9.5 |
| 342 | Q86SE5 | RNA-binding Raly-like protein OS=Homo sapiens GN=RALYL<br>PE=1 SV=2                                                                              | 43.73 | 1 | 834 |  | 7.2 |
|     | G3V129 | Putative uncharacterized protein LOC138046 OS=Homo<br>sapiens GN=RALYL PE=4 SV=1                                                                 | 43.73 | 1 | 834 |  | 7.2 |
|     | B3KT61 | RNA-binding Raly-like protein OS=Homo sapiens GN=RALYL<br>PE=2 SV=1                                                                              | 43.73 | 1 | 834 |  | 7.2 |
|     | B3KSX3 | cDNA FLJ37224 fis, clone BRAMY2000052, moderately<br>similar to RNA-binding protein Raly OS=Homo sapiens PE=2<br>SV=1                            | 43.73 | 1 | 834 |  | 7.2 |
| 343 | P35659 | Protein DEK OS=Homo sapiens GN=DEK PE=1 SV=1                                                                                                     | 43.62 | 1 | 46  |  | 8.0 |
| 344 | Q5T081 | CHC1 protein OS=Homo sapiens GN=RCC1 PE=2 SV=1                                                                                                   | 43.27 | 1 | 501 |  | 2.4 |
|     | P18754 | Regulator of chromosome condensation OS=Homo sapiens<br>GN=RCC1 PE=1 SV=1                                                                        | 43.27 | 1 | 501 |  | 2.4 |
|     | C9JW69 | Regulator of chromosome condensation (Fragment)<br>OS=Homo sapiens GN=RCC1 PE=2 SV=1                                                             | 43.27 | 1 | 501 |  | 2.4 |
| 345 | Q92823 | Neuronal cell adhesion molecule OS=Homo sapiens<br>GN=NRCAM PE=1 SV=3                                                                            | 42.88 | 1 | 793 |  | 1.3 |
|     | Q75ML9 | Putative uncharacterized protein NRCAM (Fragment)<br>OS=Homo sapiens GN=NRCAM PE=2 SV=1                                                          | 42.88 | 1 | 793 |  | 1.3 |
|     | Q4KMQ7 | NRCAM protein OS=Homo sapiens GN=NRCAM PE=2 SV=1                                                                                                 | 42.88 | 1 | 793 |  | 1.3 |
|     | Q14CA1 | NRCAM protein OS=Homo sapiens GN=NRCAM PE=2 SV=1                                                                                                 | 42.88 | 1 | 793 |  | 1.3 |
|     | F8W775 | Neuronal cell adhesion molecule OS=Homo sapiens<br>GN=NRCAM PE=2 SV=1                                                                            | 42.88 | 1 | 793 |  | 1.3 |
|     | C9JYY6 | Neuronal cell adhesion molecule OS=Homo sapiens<br>GN=NRCAM PE=2 SV=2                                                                            | 42.88 | 1 | 793 |  | 1.3 |
|     | C9JH43 | Neuronal cell adhesion molecule (Fragment) OS=Homo<br>sapiens GN=NRCAM PE=2 SV=1                                                                 | 42.88 | 1 | 793 |  | 1.3 |
|     | C9JF43 | Neuronal cell adhesion molecule (Fragment) OS=Homo<br>sapiens GN=NRCAM PE=2 SV=1                                                                 | 42.88 | 1 | 793 |  | 1.3 |
|     | C9J8B6 | Neuronal cell adhesion molecule (Fragment) OS=Homo<br>sapiens GN=NRCAM PE=4 SV=1                                                                 | 42.88 | 1 | 793 |  | 1.3 |
|     | B7Z670 | cDNA FLJ61703, highly similar to Neuronal cell adhesion<br>molecule (Fragment) OS=Homo sapiens PE=2 SV=1                                         | 42.88 | 1 | 793 |  | 1.3 |
| 346 | Q5TDH0 | Protein DDI1 homolog 2 OS=Homo sapiens GN=DDI2 PE=1<br>SV=1                                                                                      | 42.87 | 1 | 154 |  | 8.7 |
|     | H0YI14 | Protein DDI1 homolog 2 (Fragment) OS=Homo sapiens<br>GN=DDI2 PE=2 SV=1                                                                           | 42.87 | 1 | 154 |  | 8.7 |

|     |        |                                                                                                                                                        |       |   |      |  |      |
|-----|--------|--------------------------------------------------------------------------------------------------------------------------------------------------------|-------|---|------|--|------|
|     | H0Y190 | Protein DDI1 homolog 2 (Fragment) OS=Homo sapiens<br>GN=DDI2 PE=4 SV=1                                                                                 | 42.87 | 1 | 154  |  | 8.7  |
| 347 | Q8TDH9 | Biogenesis of lysosome-related organelles complex 1 subunit<br>5 OS=Homo sapiens GN=BLOC1S5 PE=1 SV=1                                                  | 42.80 | 1 | 376  |  | 7.4  |
|     | H3BN57 | Uncharacterized protein (Fragment) OS=Homo sapiens PE=4<br>SV=1                                                                                        | 42.80 | 1 | 376  |  | 7.4  |
| 348 | P12956 | X-ray repair cross-complementing protein 6 OS=Homo<br>sapiens GN=XRCC6 PE=1 SV=2                                                                       | 42.65 | 1 | 870  |  | 7.0  |
|     | B4DE32 | cDNA FLJ53970, highly similar to ATP-dependent DNA<br>helicase 2 subunit 1 (EC3.6.1.-) OS=Homo sapiens PE=2<br>SV=1                                    | 42.65 | 1 | 870  |  | 7.0  |
|     | B2RDN9 | cDNA, FLJ96699, highly similar to Homo sapiens thyroid<br>autoantigen 70kDa (Ku antigen) (G22P1), mRNA OS=Homo<br>sapiens PE=2 SV=1                    | 42.65 | 1 | 870  |  | 7.0  |
|     | B1AHC9 | X-ray repair cross-complementing protein 6 OS=Homo<br>sapiens GN=XRCC6 PE=4 SV=1                                                                       | 42.65 | 1 | 870  |  | 7.0  |
|     | B1AHC8 | X-ray repair complementing defective repair in Chinese<br>hamster cells 6 (Ku autoantigen, 70kDa), isoform CRA_b<br>OS=Homo sapiens GN=XRCC6 PE=2 SV=1 | 42.65 | 1 | 870  |  | 7.0  |
| 349 | Q6FH91 | TNNC1 protein OS=Homo sapiens GN=TNNC1 PE=2 SV=1                                                                                                       | 42.42 | 1 | 1120 |  | 11.2 |
|     | P63316 | Troponin C, slow skeletal and cardiac muscles OS=Homo<br>sapiens GN=TNNC1 PE=1 SV=1                                                                    | 42.42 | 1 | 1120 |  | 11.2 |
| 350 | Q5BJH1 | PSAP protein OS=Homo sapiens GN=PSAP PE=2 SV=1                                                                                                         | 42.41 | 1 | 1209 |  | 3.6  |
|     | Q59EN5 | Prosaposin variant (Fragment) OS=Homo sapiens PE=2<br>SV=1                                                                                             | 42.41 | 1 | 1209 |  | 3.6  |
|     | Q53FJ5 | Prosaposin (Variant Gaucher disease and variant<br>metachromatic leukodystrophy) variant (Fragment) OS=Homo<br>sapiens PE=2 SV=1                       | 42.41 | 1 | 1209 |  | 3.6  |
|     | P07602 | Proactivator polypeptide OS=Homo sapiens GN=PSAP PE=1<br>SV=2                                                                                          | 42.41 | 1 | 1209 |  | 3.6  |
|     | C9JIZ6 | Saposin-D OS=Homo sapiens GN=PSAP PE=2 SV=1                                                                                                            | 42.41 | 1 | 1209 |  | 3.6  |
|     | B4DRB7 | cDNA FLJ54136, highly similar to Proactivator polypeptide<br>OS=Homo sapiens PE=2 SV=1                                                                 | 42.41 | 1 | 1209 |  | 3.6  |
|     | B1AVU8 | Saposin-D OS=Homo sapiens GN=PSAP PE=2 SV=1                                                                                                            | 42.41 | 1 | 1209 |  | 3.6  |
| 351 | Q08211 | ATP-dependent RNA helicase A OS=Homo sapiens<br>GN=DHX9 PE=1 SV=4                                                                                      | 42.28 | 1 | 267  |  | 36.8 |
| 352 | Q8N4C6 | Ninein OS=Homo sapiens GN=NIN PE=1 SV=4                                                                                                                | 42.02 | 1 | 976  |  | 2.5  |
|     | Q5XUU0 | Ninein isoform 6 OS=Homo sapiens GN=NIN PE=2 SV=1                                                                                                      | 42.02 | 1 | 976  |  | 2.5  |
|     | H9KV85 | Ninein (Fragment) OS=Homo sapiens GN=NIN PE=4 SV=1                                                                                                     | 42.02 | 1 | 976  |  | 2.5  |
|     | H0YEL6 | Ninein (Fragment) OS=Homo sapiens GN=NIN PE=4 SV=1                                                                                                     | 42.02 | 1 | 976  |  | 2.5  |
|     | H0YDJ4 | Ninein (Fragment) OS=Homo sapiens GN=NIN PE=4 SV=1                                                                                                     | 42.02 | 1 | 976  |  | 2.5  |
|     | F8W6D3 | Ninein OS=Homo sapiens GN=NIN PE=2 SV=1                                                                                                                | 42.02 | 1 | 976  |  | 2.5  |
|     | E9PN67 | Ninein OS=Homo sapiens GN=NIN PE=4 SV=1                                                                                                                | 42.02 | 1 | 976  |  | 2.5  |
|     | C9J066 | Ninein OS=Homo sapiens GN=NIN PE=2 SV=1                                                                                                                | 42.02 | 1 | 976  |  | 2.5  |



|     |        |                                                                                                                                 |       |   |     |  |     |
|-----|--------|---------------------------------------------------------------------------------------------------------------------------------|-------|---|-----|--|-----|
| 353 | Q6NTA2 | HNRNPL protein (Fragment) OS=Homo sapiens GN=HNRNPL PE=2 SV=2                                                                   | 41.42 | 1 | 721 |  | 3.6 |
|     | P14866 | Heterogeneous nuclear ribonucleoprotein L OS=Homo sapiens GN=HNRNPL PE=1 SV=2                                                   | 41.42 | 1 | 721 |  | 3.6 |
|     | MOQXS5 | Heterogeneous nuclear ribonucleoprotein L (Fragment) OS=Homo sapiens GN=HNRNPL PE=4 SV=1                                        | 41.42 | 1 | 721 |  | 3.6 |
|     | B2R959 | cDNA, FLJ94229, highly similar to Homo sapiens heterogeneous nuclear ribonucleoprotein L (HNRPL),mRNA OS=Homo sapiens PE=2 SV=1 | 41.42 | 1 | 721 |  | 3.6 |
| 354 | Q9Y371 | Endophilin-B1 OS=Homo sapiens GN=SH3GLB1 PE=1 SV=1                                                                              | 41.39 | 1 | 58  |  | 2.0 |
|     | Q9NR46 | Endophilin-B2 OS=Homo sapiens GN=SH3GLB2 PE=1 SV=1                                                                              | 41.39 | 1 | 58  |  | 2.0 |
|     | F8WFB9 | Endophilin-B2 OS=Homo sapiens GN=SH3GLB2 PE=2 SV=1                                                                              | 41.39 | 1 | 58  |  | 2.0 |
|     | B7ZC39 | Endophilin-B2 OS=Homo sapiens GN=SH3GLB2 PE=2 SV=1                                                                              | 41.39 | 1 | 58  |  | 2.0 |
|     | B7ZC38 | Endophilin-B2 OS=Homo sapiens GN=SH3GLB2 PE=2 SV=1                                                                              | 41.39 | 1 | 58  |  | 2.0 |

**UniProt  
Human  
Protein  
IDs,  
cont.**

| Gr<br>p<br>Nr. | Accessio<br>n<br>Number | Protein Name                                                                   | Prote<br>in<br>Scor<br>e | Uniqu<br>e<br>PSMs | PSM Serial Nrs. | Oth<br>er<br>Grp. | %<br>Seq.<br>Cove<br>r. |
|----------------|-------------------------|--------------------------------------------------------------------------------|--------------------------|--------------------|-----------------|-------------------|-------------------------|
| 355            | Q2NNQ8                  | FER-1-like protein 4 OS=Homo sapiens GN=FER1L4 PE=2 SV=1                       | 41.32                    | 1                  | 600             |                   | 7.9                     |
|                | A9Z1Z3                  | Fer-1-like protein 4 OS=Homo sapiens GN=FER1L4 PE=2 SV=1                       | 41.32                    | 1                  | 600             |                   | 7.9                     |
| 356            | Q92973                  | Transportin-1 OS=Homo sapiens GN=TNPO1 PE=1 SV=2                               | 41.25                    | 1                  | 848             |                   | 9.4                     |
|                | J3KPU5                  | Transportin-1 OS=Homo sapiens GN=TNPO1 PE=4 SV=1                               | 41.25                    | 1                  | 848             |                   | 9.4                     |
|                | E7EW37                  | Transportin-1 OS=Homo sapiens GN=TNPO1 PE=2 SV=1                               | 41.25                    | 1                  | 848             |                   | 9.4                     |
|                | B4DSC0                  | Transportin-1 OS=Homo sapiens GN=TNPO1 PE=2 SV=1                               | 41.25                    | 1                  | 848             |                   | 9.4                     |
| 357            | Q9BY44                  | Eukaryotic translation initiation factor 2A OS=Homo sapiens GN=EIF2A PE=1 SV=3 | 41.24                    | 1                  | 438             |                   | 5.2                     |
|                | F8WAE5                  | Eukaryotic translation initiation factor 2A OS=Homo sapiens GN=EIF2A PE=2 SV=1 | 41.24                    | 1                  | 438             |                   | 5.2                     |
|                | B4DQ14                  | Eukaryotic translation initiation factor 2A OS=Homo sapiens GN=EIF2A PE=2 SV=1 | 41.24                    | 1                  | 438             |                   | 5.2                     |
|                | B4DF96                  | Eukaryotic translation initiation factor 2A OS=Homo sapiens GN=EIF2A PE=2 SV=1 | 41.24                    | 1                  | 438             |                   | 5.2                     |
| 358            | Q6P6D7                  | Phosphoglycerate mutase 1 (Brain) OS=Homo sapiens GN=PGAM1 PE=2 SV=1           | 41.13                    | 2                  | 21 1020         |                   | 6.3                     |

|     |        |                                                                                                      |       |   |         |  |      |
|-----|--------|------------------------------------------------------------------------------------------------------|-------|---|---------|--|------|
|     | Q6FHU2 | HCG2015269, isoform CRA_a (Fragment) OS=Homo sapiens GN=PGAM1 PE=2 SV=1                              | 41.13 | 2 | 21 1020 |  | 6.3  |
|     | Q6FHK8 | PGAM1 protein OS=Homo sapiens GN=PGAM1 PE=2 SV=1                                                     | 41.13 | 2 | 21 1020 |  | 6.3  |
|     | Q53G35 | Phosphoglycerate mutase (Fragment) OS=Homo sapiens PE=2 SV=1                                         | 41.13 | 2 | 21 1020 |  | 6.3  |
|     | Q0D2Q6 | Phosphoglycerate mutase 1 (Brain) OS=Homo sapiens GN=PGAM1 PE=2 SV=1                                 | 41.13 | 2 | 21 1020 |  | 6.3  |
|     | P18669 | Phosphoglycerate mutase 1 OS=Homo sapiens GN=PGAM1 PE=1 SV=2                                         | 41.13 | 2 | 21 1020 |  | 6.3  |
|     | P15259 | Phosphoglycerate mutase 2 OS=Homo sapiens GN=PGAM2 PE=1 SV=3                                         | 41.13 | 2 | 21 1020 |  | 6.3  |
|     | B7Z9E5 | cDNA, FLJ78809, highly similar to Phosphoglycerate mutase 1 (EC 5.4.2.1) OS=Homo sapiens PE=2 SV=1   | 41.13 | 2 | 21 1020 |  | 6.3  |
|     | B4DMJ7 | HCG2015269, isoform CRA_c OS=Homo sapiens GN=hCG_2015269 PE=2 SV=1                                   | 41.13 | 2 | 21 1020 |  | 6.3  |
|     | B4DKL5 | cDNA FLJ51983, highly similar to Phosphoglycerate mutase 1 (EC 5.4.2.1) OS=Homo sapiens PE=2 SV=1    | 41.13 | 2 | 21 1020 |  | 6.3  |
| 359 | Q5SWC8 | Heterochromatin protein 1-binding protein 3 (Fragment) OS=Homo sapiens GN=HP1BP3 PE=2 SV=1           | 40.95 | 1 | 954     |  | 32.9 |
|     | Q5SSJ5 | Heterochromatin protein 1-binding protein 3 OS=Homo sapiens GN=HP1BP3 PE=1 SV=1                      | 40.95 | 1 | 954     |  | 32.9 |
| 360 | Q13884 | Beta-1-syntrophin OS=Homo sapiens GN=SNTB1 PE=1 SV=3                                                 | 40.91 | 1 | 1015    |  | 1.7  |
| 361 | Q8IX12 | Cell division cycle and apoptosis regulator protein 1 OS=Homo sapiens GN=CCAR1 PE=1 SV=2             | 40.87 | 1 | 835     |  | 1.4  |
|     | F5H3E1 | Cell division cycle and apoptosis regulator protein 1 OS=Homo sapiens GN=CCAR1 PE=4 SV=1             | 40.87 | 1 | 835     |  | 1.4  |
|     | F5H2E6 | Cell division cycle and apoptosis regulator protein 1 (Fragment) OS=Homo sapiens GN=CCAR1 PE=2 SV=1  | 40.87 | 1 | 835     |  | 1.4  |
|     | F5H1H2 | Cell division cycle and apoptosis regulator protein 1 (Fragment) OS=Homo sapiens GN=CCAR1 PE=2 SV=1  | 40.87 | 1 | 835     |  | 1.4  |
| 362 | Q9BS10 | Similar to ribosomal protein S8 (Fragment) OS=Homo sapiens PE=2 SV=1                                 | 40.87 | 1 | 736     |  | 4.3  |
|     | Q5JR95 | 40S ribosomal protein S8 OS=Homo sapiens GN=RPS8 PE=4 SV=1                                           | 40.87 | 1 | 736     |  | 4.3  |
|     | Q5JR94 | 40S ribosomal protein S8 OS=Homo sapiens GN=RPS8 PE=2 SV=1                                           | 40.87 | 1 | 736     |  | 4.3  |
|     | P62241 | 40S ribosomal protein S8 OS=Homo sapiens GN=RPS8 PE=1 SV=2                                           | 40.87 | 1 | 736     |  | 4.3  |
| 363 | P60953 | Cell division control protein 42 homolog OS=Homo sapiens GN=CDC42 PE=1 SV=2                          | 40.83 | 1 | 969     |  | 7.3  |
|     | E7ETU3 | Cell division control protein 42 homolog OS=Homo sapiens GN=CDC42 PE=2 SV=1                          | 40.83 | 1 | 969     |  | 7.3  |
|     | B7ZAY4 | cDNA, FLJ79348, highly similar to Cell division control protein 42 homolog OS=Homo sapiens PE=2 SV=1 | 40.83 | 1 | 969     |  | 7.3  |
|     | B4E1U9 | cDNA FLJ54776, highly similar to Cell division control protein 42 homolog OS=Homo sapiens PE=2 SV=1  | 40.83 | 1 | 969     |  | 7.3  |

|     |        |                                                                                                       |       |   |     |  |      |
|-----|--------|-------------------------------------------------------------------------------------------------------|-------|---|-----|--|------|
|     | B4DMH5 | cDNA FLJ55107, highly similar to Cell division control protein 42 homolog OS=Homo sapiens PE=2 SV=1   | 40.83 | 1 | 969 |  | 7.3  |
| 364 | P62306 | Small nuclear ribonucleoprotein F OS=Homo sapiens GN=SNRPF PE=1 SV=1                                  | 40.80 | 1 | 859 |  | 9.3  |
| 365 | O75947 | ATP synthase subunit d, mitochondrial OS=Homo sapiens GN=ATP5H PE=1 SV=3                              | 40.75 | 1 | 197 |  | 15.7 |
|     | F5H608 | ATP synthase subunit d, mitochondrial OS=Homo sapiens GN=ATP5H PE=4 SV=2                              | 40.75 | 1 | 197 |  | 15.7 |
|     | A0PJH2 | ATP5H protein (Fragment) OS=Homo sapiens GN=ATP5H PE=2 SV=1                                           | 40.75 | 1 | 197 |  | 15.7 |
| 366 | O76013 | Keratin, type I cuticular Ha6 OS=Homo sapiens GN=KRT36 PE=1 SV=1                                      | 40.68 | 1 | 807 |  | 4.3  |
| 367 | O76015 | Keratin, type I cuticular Ha8 OS=Homo sapiens GN=KRT38 PE=2 SV=3                                      | 40.68 | 1 | 796 |  | 3.9  |
| 368 | Q4J6C0 | PPM1B beta isoform variant 6 (Fragment) OS=Homo sapiens GN=PPM1B PE=2 SV=1                            | 40.51 | 1 | 273 |  | 11.3 |
| 369 | I3L2L6 | Serine/arginine repetitive matrix protein 2 OS=Homo sapiens GN=SRRM2 PE=2 SV=1                        | 40.38 | 1 | 832 |  | 5.8  |
| 370 | Q59G88 | Coronin (Fragment) OS=Homo sapiens PE=3 SV=1                                                          | 40.14 | 1 | 365 |  | 2.9  |
|     | P31146 | Coronin-1A OS=Homo sapiens GN=CORO1A PE=1 SV=4                                                        | 40.14 | 1 | 365 |  | 2.9  |
| 371 | Q6P2Q9 | Pre-mRNA-processing-splicing factor 8 OS=Homo sapiens GN=PRPF8 PE=1 SV=2                              | 40.11 | 1 | 622 |  | 1.0  |
|     | Q53GM6 | U5 snRNP-specific protein variant (Fragment) OS=Homo sapiens PE=2 SV=1                                | 40.11 | 1 | 622 |  | 1.0  |
|     | B4DK16 | cDNA FLJ57882, highly similar to Pre-mRNA-processing-splicing factor 8 OS=Homo sapiens PE=2 SV=1      | 40.11 | 1 | 622 |  | 1.0  |
| 372 | Q9H173 | Nucleotide exchange factor SIL1 OS=Homo sapiens GN=SIL1 PE=1 SV=1                                     | 39.68 | 1 | 56  |  | 6.4  |
|     | D6RIU8 | Nucleotide exchange factor SIL1 (Fragment) OS=Homo sapiens GN=SIL1 PE=2 SV=1                          | 39.68 | 1 | 56  |  | 6.4  |
|     | D6RG16 | Nucleotide exchange factor SIL1 (Fragment) OS=Homo sapiens GN=SIL1 PE=2 SV=1                          | 39.68 | 1 | 56  |  | 6.4  |
|     | D6REA1 | Nucleotide exchange factor SIL1 OS=Homo sapiens GN=SIL1 PE=2 SV=1                                     | 39.68 | 1 | 56  |  | 6.4  |
|     | D6RBP7 | Nucleotide exchange factor SIL1 (Fragment) OS=Homo sapiens GN=SIL1 PE=2 SV=1                          | 39.68 | 1 | 56  |  | 6.4  |
|     | D6RAI3 | Nucleotide exchange factor SIL1 (Fragment) OS=Homo sapiens GN=SIL1 PE=2 SV=1                          | 39.68 | 1 | 56  |  | 6.4  |
| 373 | Q5W0S5 | UV excision repair protein RAD23 homolog B (Fragment) OS=Homo sapiens GN=RAD23B PE=2 SV=1             | 39.61 | 1 | 558 |  | 8.9  |
|     | Q53F10 | UV excision repair protein RAD23 homolog B variant (Fragment) OS=Homo sapiens PE=2 SV=1               | 39.61 | 1 | 558 |  | 8.9  |
|     | P54727 | UV excision repair protein RAD23 homolog B OS=Homo sapiens GN=RAD23B PE=1 SV=1                        | 39.61 | 1 | 558 |  | 8.9  |
|     | B4DEA3 | cDNA FLJ56531, highly similar to UV excision repair protein RAD23 homolog B OS=Homo sapiens PE=2 SV=1 | 39.61 | 1 | 558 |  | 8.9  |

|     |        |                                                                                                     |       |   |     |  |      |
|-----|--------|-----------------------------------------------------------------------------------------------------|-------|---|-----|--|------|
| 374 | Q93045 | Stathmin-2 OS=Homo sapiens GN=STMN2 PE=1 SV=3                                                       | 39.39 | 1 | 202 |  | 11.9 |
|     | E5RGX5 | Stathmin OS=Homo sapiens GN=STMN2 PE=2 SV=1                                                         | 39.39 | 1 | 202 |  | 11.9 |
|     | B7Z4N6 | cDNA FLJ53062, highly similar to Stathmin-2 OS=Homo sapiens PE=2 SV=1                               | 39.39 | 1 | 202 |  | 11.9 |
| 375 | Q1JQ76 | Ribosomal protein (Fragment) OS=Homo sapiens GN=RPL10A PE=2 SV=1                                    | 39.30 | 1 | 552 |  | 11.7 |
|     | P62906 | 60S ribosomal protein L10a OS=Homo sapiens GN=RPL10A PE=1 SV=2                                      | 39.30 | 1 | 552 |  | 11.7 |
| 376 | Q5TC02 | Sodium/potassium-transporting ATPase subunit alpha-1 (Fragment) OS=Homo sapiens GN=ATP1A1 PE=4 SV=1 | 38.75 | 1 | 89  |  | 4.9  |
|     | Q5TC01 | Sodium/potassium-transporting ATPase subunit alpha-1 (Fragment) OS=Homo sapiens GN=ATP1A1 PE=4 SV=1 | 38.75 | 1 | 89  |  | 4.9  |
| 377 | Q5VTU8 | ATP synthase subunit epsilon-like protein, mitochondrial OS=Homo sapiens GN=ATP5EP2 PE=3 SV=1       | 38.74 | 1 | 963 |  | 15.7 |
|     | P56381 | ATP synthase subunit epsilon, mitochondrial OS=Homo sapiens GN=ATP5E PE=1 SV=2                      | 38.74 | 1 | 963 |  | 15.7 |
| 378 | Q71UM5 | 40S ribosomal protein S27-like OS=Homo sapiens GN=RPS27L PE=1 SV=3                                  | 38.61 | 1 | 153 |  | 8.0  |
|     | P42677 | 40S ribosomal protein S27 OS=Homo sapiens GN=RPS27 PE=1 SV=3                                        | 38.61 | 1 | 153 |  | 8.0  |
|     | H0YMV8 | 40S ribosomal protein S27 OS=Homo sapiens GN=RPS27L PE=2 SV=1                                       | 38.61 | 1 | 153 |  | 8.0  |
|     | C9J1C5 | 40S ribosomal protein S27 OS=Homo sapiens GN=RPS27L PE=3 SV=1                                       | 38.61 | 1 | 153 |  | 8.0  |
|     | A4D1G5 | 40S ribosomal protein S27 OS=Homo sapiens GN=LOC392748 PE=3 SV=1                                    | 38.61 | 1 | 153 |  | 8.0  |
| 379 | P08758 | Annexin A5 OS=Homo sapiens GN=ANXA5 PE=1 SV=2                                                       | 38.60 | 1 | 596 |  | 4.5  |
|     | E7ENQ5 | Annexin OS=Homo sapiens GN=ANXA5 PE=2 SV=1                                                          | 38.60 | 1 | 596 |  | 4.5  |
|     | D6RBL5 | Annexin OS=Homo sapiens GN=ANXA5 PE=2 SV=1                                                          | 38.60 | 1 | 596 |  | 4.5  |
|     | D6RBE9 | Annexin OS=Homo sapiens GN=ANXA5 PE=2 SV=1                                                          | 38.60 | 1 | 596 |  | 4.5  |
| 380 | Q6NZ52 | Ribosomal protein L27a OS=Homo sapiens GN=RPL27A PE=2 SV=1                                          | 38.49 | 1 | 104 |  | 14.2 |
|     | P46776 | 60S ribosomal protein L27a OS=Homo sapiens GN=RPL27A PE=1 SV=2                                      | 38.49 | 1 | 104 |  | 14.2 |
|     | E9PLX7 | 60S ribosomal protein L27a OS=Homo sapiens GN=RPL27A PE=2 SV=1                                      | 38.49 | 1 | 104 |  | 14.2 |
|     | E9PJD9 | 60S ribosomal protein L27a OS=Homo sapiens GN=RPL27A PE=3 SV=1                                      | 38.49 | 1 | 104 |  | 14.2 |
| 381 | E7EVA0 | Microtubule-associated protein OS=Homo sapiens GN=MAP4 PE=2 SV=1                                    | 38.48 | 1 | 176 |  | 1.6  |
| 382 | P62837 | Ubiquitin-conjugating enzyme E2 D2 OS=Homo sapiens GN=UBE2D2 PE=1 SV=1                              | 38.23 | 1 | 543 |  | 9.3  |
|     | P61077 | Ubiquitin-conjugating enzyme E2 D3 OS=Homo sapiens GN=UBE2D3 PE=1 SV=1                              | 38.23 | 1 | 543 |  | 9.3  |

|     |        |                                                                                                                                           |       |   |      |  |      |
|-----|--------|-------------------------------------------------------------------------------------------------------------------------------------------|-------|---|------|--|------|
|     | H9KV45 | Ubiquitin-conjugating enzyme E2 D3 OS=Homo sapiens<br>GN=UBE2D3 PE=2 SV=1                                                                 | 38.23 | 1 | 543  |  | 9.3  |
|     | D6RFM0 | Ubiquitin-conjugating enzyme E2 D2 (Fragment) OS=Homo sapiens<br>GN=UBE2D2 PE=2 SV=1                                                      | 38.23 | 1 | 543  |  | 9.3  |
|     | D6RAW0 | Ubiquitin-conjugating enzyme E2 D3 (Fragment) OS=Homo sapiens<br>GN=UBE2D3 PE=2 SV=1                                                      | 38.23 | 1 | 543  |  | 9.3  |
|     | D6RAH7 | Ubiquitin-conjugating enzyme E2 D3 OS=Homo sapiens<br>GN=UBE2D3 PE=3 SV=1                                                                 | 38.23 | 1 | 543  |  | 9.3  |
| 383 | Q9NZT1 | Calmodulin-like protein 5 OS=Homo sapiens<br>GN=CALML5 PE=1 SV=2                                                                          | 38.21 | 1 | 1032 |  | 11.6 |
|     | Q53H37 | Calmodulin-like skin protein variant (Fragment) OS=Homo sapiens<br>PE=2 SV=1                                                              | 38.21 | 1 | 1032 |  | 11.6 |
| 384 | Q9P013 | Spliceosome-associated protein CWC15 homolog OS=Homo sapiens<br>GN=CWC15 PE=1 SV=2                                                        | 38.19 | 1 | 10   |  | 4.8  |
| 385 | Q9UG16 | Putative uncharacterized protein DKFZp564P0562 (Fragment)<br>OS=Homo sapiens GN=DKFZp564P0562 PE=2 SV=1                                   | 38.10 | 1 | 560  |  | 2.0  |
| 386 | P49411 | Elongation factor Tu, mitochondrial OS=Homo sapiens<br>GN=TUFM PE=1 SV=2                                                                  | 37.98 | 1 | 524  |  | 2.4  |
| 387 | P62888 | 60S ribosomal protein L30 OS=Homo sapiens<br>GN=RPL30 PE=1 SV=2                                                                           | 37.71 | 1 | 502  |  | 7.0  |
|     | E5RI99 | 60S ribosomal protein L30 (Fragment) OS=Homo sapiens<br>GN=RPL30 PE=2 SV=1                                                                | 37.71 | 1 | 502  |  | 7.0  |
| 388 | P09497 | Clathrin light chain B OS=Homo sapiens<br>GN=CLTB PE=1 SV=1                                                                               | 37.69 | 1 | 467  |  | 3.5  |
| 389 | Q6T598 | Cellular nucleic acid binding protein (Fragment) OS=Homo sapiens<br>PE=2 SV=1                                                             | 37.63 | 1 | 1027 |  | 8.1  |
|     | Q4JGY1 | Cellular nucleic acid binding protein beta variant 1 OS=Homo sapiens<br>GN=ZNF9 PE=2 SV=1                                                 | 37.63 | 1 | 1027 |  | 8.1  |
|     | P62633 | Cellular nucleic acid-binding protein OS=Homo sapiens<br>GN=CNBP PE=1 SV=1                                                                | 37.63 | 1 | 1027 |  | 8.1  |
|     | B4DP17 | Cellular nucleic acid-binding protein OS=Homo sapiens<br>GN=CNBP PE=2 SV=1                                                                | 37.63 | 1 | 1027 |  | 8.1  |
| 390 | P21796 | Voltage-dependent anion-selective channel protein 1 OS=Homo sapiens<br>GN=VDAC1 PE=1 SV=2                                                 | 37.54 | 1 | 18   |  | 4.2  |
|     | B4DEI3 | cDNA FLJ57715, highly similar to Voltage-dependent anion-selective channel protein 1 OS=Homo sapiens<br>PE=2 SV=1                         | 37.54 | 1 | 18   |  | 4.2  |
|     | B3KTS5 | cDNA FLJ38670 fis, clone HSYRA2000190, highly similar to Voltage-dependent anion-selective channel protein 1 OS=Homo sapiens<br>PE=2 SV=1 | 37.54 | 1 | 18   |  | 4.2  |
| 391 | Q8NBJ4 | Golgi membrane protein 1 OS=Homo sapiens<br>GN=GOLM1 PE=1 SV=1                                                                            | 37.31 | 1 | 310  |  | 4.0  |
|     | B3KNK9 | Golgi phosphoprotein 2, isoform CRA_a OS=Homo sapiens<br>GN=GOLPH2 PE=2 SV=1                                                              | 37.31 | 1 | 310  |  | 4.0  |

**UniProt  
Human  
Protein  
IDs,  
cont.**

| <i>Gr<br/>p<br/>Nr.</i> | <i>Accessio<br/>n<br/>Number</i> | <i>Protein Name</i>                                                                                                  | <i>Prote<br/>in<br/>Scor<br/>e</i> | <i>Uniqu<br/>e<br/>PSMs</i> | <i>PSM Serial Nrs.</i> | <i>Oth<br/>er<br/>Grp.</i> | <i>%<br/>Seq.<br/>Cove<br/>r.</i> |
|-------------------------|----------------------------------|----------------------------------------------------------------------------------------------------------------------|------------------------------------|-----------------------------|------------------------|----------------------------|-----------------------------------|
| 392                     | Q53XX5                           | Cold inducible RNA binding protein OS=Homo sapiens<br>GN=CIRBP PE=2 SV=1                                             | 37.13                              | 1                           | 1071                   |                            | 22.3                              |
|                         | Q14011                           | Cold-inducible RNA-binding protein OS=Homo sapiens<br>GN=CIRBP PE=1 SV=1                                             | 37.13                              | 1                           | 1071                   |                            | 22.3                              |
|                         | K7EQR7                           | Cold-inducible RNA-binding protein OS=Homo sapiens<br>GN=CIRBP PE=4 SV=1                                             | 37.13                              | 1                           | 1071                   |                            | 22.3                              |
|                         | K7EPM4                           | Cold-inducible RNA-binding protein OS=Homo sapiens<br>GN=CIRBP PE=4 SV=1                                             | 37.13                              | 1                           | 1071                   |                            | 22.3                              |
|                         | K7EMY9                           | Cold-inducible RNA-binding protein (Fragment) OS=Homo<br>sapiens GN=CIRBP PE=4 SV=1                                  | 37.13                              | 1                           | 1071                   |                            | 22.3                              |
|                         | D6W5Y5                           | Cold inducible RNA binding protein, isoform CRA_c OS=Homo<br>sapiens GN=CIRBP PE=4 SV=1                              | 37.13                              | 1                           | 1071                   |                            | 22.3                              |
|                         | B4E2X2                           | Cold-inducible RNA-binding protein OS=Homo sapiens<br>GN=CIRBP PE=2 SV=1                                             | 37.13                              | 1                           | 1071                   |                            | 22.3                              |
| 393                     | Q14624                           | Inter-alpha-trypsin inhibitor heavy chain H4 OS=Homo<br>sapiens GN=ITIH4 PE=1 SV=4                                   | 36.94                              | 1                           | 646                    |                            | 0.6                               |
|                         | B7ZKJ8                           | 35 kDa inter-alpha-trypsin inhibitor heavy chain H4 OS=Homo<br>sapiens GN=ITIH4 PE=2 SV=1                            | 36.94                              | 1                           | 646                    |                            | 0.6                               |
|                         | B7Z544                           | cDNA FLJ51742, highly similar to Inter-alpha-trypsin inhibitor<br>heavy chain H4 OS=Homo sapiens PE=2 SV=1           | 36.94                              | 1                           | 646                    |                            | 0.6                               |
|                         | B2RMS9                           | Inter-alpha (Globulin) inhibitor H4 (Plasma Kallikrein-sensitive<br>glycoprotein) OS=Homo sapiens GN=ITIH4 PE=2 SV=1 | 36.94                              | 1                           | 646                    |                            | 0.6                               |
| 394                     | Q9Y3Z5                           | Putative uncharacterized protein DKFZp564B112 (Fragment)<br>OS=Homo sapiens GN=DKFZp564B112 PE=2 SV=2                | 36.73                              | 1                           | 1176                   |                            | 2.0                               |
|                         | Q9UK43                           | Chondrosarcoma-associated protein 2 OS=Homo sapiens<br>GN=CSA2 PE=2 SV=1                                             | 36.73                              | 1                           | 1176                   |                            | 2.0                               |
|                         | Q9H4P6                           | Clone TCCCIA00142 mRNA sequence OS=Homo sapiens<br>PE=2 SV=1                                                         | 36.73                              | 1                           | 1176                   |                            | 2.0                               |
|                         | Q95HA6                           | IK cytokine, down-regulator of HLA II OS=Homo sapiens<br>GN=IK PE=2 SV=1                                             | 36.73                              | 1                           | 1176                   |                            | 2.0                               |
|                         | Q13123                           | Protein Red OS=Homo sapiens GN=IK PE=1 SV=3                                                                          | 36.73                              | 1                           | 1176                   |                            | 2.0                               |
|                         | E7EQZ7                           | Protein Red (Fragment) OS=Homo sapiens GN=IK PE=2<br>SV=1                                                            | 36.73                              | 1                           | 1176                   |                            | 2.0                               |

|     |        |                                                                                                                           |       |   |      |  |      |
|-----|--------|---------------------------------------------------------------------------------------------------------------------------|-------|---|------|--|------|
|     | D6REL4 | Protein Red (Fragment) OS=Homo sapiens GN=IK PE=2 SV=1                                                                    | 36.73 | 1 | 1176 |  | 2.0  |
|     | D6RCQ4 | Protein Red (Fragment) OS=Homo sapiens GN=IK PE=2 SV=1                                                                    | 36.73 | 1 | 1176 |  | 2.0  |
|     | D6RAY9 | Protein Red (Fragment) OS=Homo sapiens GN=IK PE=2 SV=1                                                                    | 36.73 | 1 | 1176 |  | 2.0  |
|     | B2R5Y4 | cDNA, FLJ92684, highly similar to Homo sapiens IK cytokine, down-regulator of HLA II (IK), mRNA OS=Homo sapiens PE=2 SV=1 | 36.73 | 1 | 1176 |  | 2.0  |
| 395 | H0Y5B4 | 60S ribosomal protein L36a (Fragment) OS=Homo sapiens GN=RPL36A PE=3 SV=1                                                 | 36.72 | 1 | 606  |  | 6.9  |
| 396 | A6NHZ5 | Leucine-rich repeat-containing protein 14B OS=Homo sapiens GN=LRRC14B PE=3 SV=3                                           | 36.59 | 1 | 100  |  | 12.0 |
| 397 | Q5JQF8 | Polyadenylate-binding protein 1-like 2 OS=Homo sapiens GN=PABPC1L2A PE=2 SV=1                                             | 36.33 | 1 | 520  |  | 16.5 |
| 398 | Q2M1N2 | Laminin, gamma 2 OS=Homo sapiens GN=LAMC2 PE=2 SV=1                                                                       | 36.23 | 1 | 1105 |  | 0.7  |
|     | Q13753 | Laminin subunit gamma-2 OS=Homo sapiens GN=LAMC2 PE=1 SV=2                                                                | 36.23 | 1 | 1105 |  | 0.7  |
| 399 | P56385 | ATP synthase subunit e, mitochondrial OS=Homo sapiens GN=ATP5I PE=1 SV=2                                                  | 36.22 | 1 | 233  |  | 14.5 |
| 400 | O95218 | Zinc finger Ran-binding domain-containing protein 2 OS=Homo sapiens GN=ZRANB2 PE=1 SV=2                                   | 36.20 | 1 | 342  |  | 2.4  |
| 401 | Q6IPX4 | 40S ribosomal protein S16 OS=Homo sapiens GN=RPS16 PE=2 SV=1                                                              | 36.14 | 1 | 66   |  | 15.1 |
| 402 | P31150 | Rab GDP dissociation inhibitor alpha OS=Homo sapiens GN=GDI1 PE=1 SV=2                                                    | 36.09 | 1 | 359  |  | 4.6  |
|     | B4DHX4 | cDNA FLJ52902, highly similar to Rab GDP dissociation inhibitor alpha OS=Homo sapiens PE=2 SV=1                           | 36.09 | 1 | 359  |  | 4.6  |
| 403 | Q13429 | Insulin-like growth factor I (Fragment) OS=Homo sapiens GN=IGF-I PE=2 SV=1                                                | 35.99 | 1 | 1051 |  | 9.5  |
|     | P05019 | Insulin-like growth factor I OS=Homo sapiens GN=IGF1 PE=1 SV=1                                                            | 35.99 | 1 | 1051 |  | 16.5 |
|     | E9PD02 | Insulin-like growth factor I OS=Homo sapiens GN=IGF1 PE=3 SV=1                                                            | 35.99 | 1 | 1051 |  | 16.5 |
| 404 | O75525 | KH domain-containing, RNA-binding, signal transduction-associated protein 3 OS=Homo sapiens GN=KHDRBS3 PE=1 SV=1          | 35.89 | 1 | 529  |  | 6.6  |
| 405 | Q9P258 | Protein RCC2 OS=Homo sapiens GN=RCC2 PE=1 SV=2                                                                            | 35.89 | 1 | 328  |  | 3.3  |
|     | A5PLK7 | RCC2 protein (Fragment) OS=Homo sapiens GN=RCC2 PE=2 SV=1                                                                 | 35.89 | 1 | 328  |  | 3.3  |
| 406 | Q6UW32 | Insulin growth factor-like family member 1 OS=Homo sapiens GN=IGFL1 PE=1 SV=1                                             | 35.87 | 1 | 516  |  | 9.1  |
| 407 | Q8WX77 | Insulin-like growth factor-binding protein-like 1 OS=Homo sapiens GN=IGFBPL1 PE=2 SV=1                                    | 35.85 | 1 | 439  |  | 4.3  |



|     |        |                                                                                                  |       |   |      |  |      |
|-----|--------|--------------------------------------------------------------------------------------------------|-------|---|------|--|------|
| 408 | Q96DV6 | 40S ribosomal protein S6 OS=Homo sapiens GN=RPS6 PE=2 SV=1                                       | 35.56 | 1 | 441  |  | 3.2  |
|     | P62753 | 40S ribosomal protein S6 OS=Homo sapiens GN=RPS6 PE=1 SV=1                                       | 35.56 | 1 | 441  |  | 3.2  |
|     | A2A3R7 | 40S ribosomal protein S6 OS=Homo sapiens GN=RPS6 PE=2 SV=1                                       | 35.56 | 1 | 441  |  | 3.2  |
|     | A2A3R6 | 40S ribosomal protein S6 OS=Homo sapiens GN=RPS6 PE=2 SV=1                                       | 35.56 | 1 | 441  |  | 3.2  |
| 409 | Q92598 | Heat shock protein 105 kDa OS=Homo sapiens GN=HSPH1 PE=1 SV=1                                    | 35.35 | 1 | 181  |  | 3.7  |
|     | B4DYH1 | Heat shock 105kDa/110kDa protein 1, isoform CRA_b OS=Homo sapiens GN=HSPH1 PE=2 SV=1             | 35.35 | 1 | 181  |  | 3.7  |
|     | B4DY72 | Heat shock protein 105 kDa OS=Homo sapiens GN=HSPH1 PE=2 SV=1                                    | 35.35 | 1 | 181  |  | 3.7  |
|     | B4DF68 | cDNA FLJ55325, highly similar to Heat-shock protein 105 kDa OS=Homo sapiens PE=2 SV=1            | 35.35 | 1 | 181  |  | 3.7  |
| 410 | L0R512 | Alternative protein NCAM2 OS=Homo sapiens GN=NCAM2 PE=4 SV=1                                     | 35.24 | 1 | 160  |  | 21.4 |
| 411 | B4DEX9 | cDNA FLJ56687, highly similar to Serotransferrin OS=Homo sapiens PE=2 SV=1                       | 35.09 | 1 | 411  |  | 37.7 |
| 412 | O75937 | DnaJ homolog subfamily C member 8 OS=Homo sapiens GN=DNAJC8 PE=1 SV=2                            | 35.01 | 1 | 1059 |  | 8.7  |
| 413 | Q99733 | Nucleosome assembly protein 1-like 4 OS=Homo sapiens GN=NAP1L4 PE=1 SV=1                         | 34.98 | 1 | 811  |  | 4.8  |
|     | F5HFY4 | Nucleosome assembly protein 1-like 4 OS=Homo sapiens GN=NAP1L4b PE=2 SV=1                        | 34.98 | 1 | 811  |  | 4.8  |
|     | E9PS34 | Nucleosome assembly protein 1-like 4 (Fragment) OS=Homo sapiens GN=NAP1L4 PE=2 SV=1              | 34.98 | 1 | 811  |  | 4.8  |
|     | E9PNW0 | Nucleosome assembly protein 1-like 4 (Fragment) OS=Homo sapiens GN=NAP1L4 PE=2 SV=1              | 34.98 | 1 | 811  |  | 4.8  |
|     | E9PNJ7 | Nucleosome assembly protein 1-like 4 (Fragment) OS=Homo sapiens GN=NAP1L4 PE=2 SV=1              | 34.98 | 1 | 811  |  | 4.8  |
|     | E9PKT8 | Nucleosome assembly protein 1-like 4 (Fragment) OS=Homo sapiens GN=NAP1L4 PE=2 SV=1              | 34.98 | 1 | 811  |  | 4.8  |
|     | E9PJJ2 | Nucleosome assembly protein 1-like 4 (Fragment) OS=Homo sapiens GN=NAP1L4 PE=2 SV=1              | 34.98 | 1 | 811  |  | 4.8  |
|     | C9JZI7 | Nucleosome assembly protein 1-like 4 (Fragment) OS=Homo sapiens GN=NAP1L4 PE=2 SV=1              | 34.98 | 1 | 811  |  | 4.8  |
|     | C9J6D1 | Nucleosome assembly protein 1-like 4 (Fragment) OS=Homo sapiens GN=NAP1L4 PE=2 SV=1              | 34.98 | 1 | 811  |  | 4.8  |
|     | B7ZB83 | cDNA, FLJ79447, highly similar to Nucleosome assembly protein 1-like 4 OS=Homo sapiens PE=2 SV=1 | 34.98 | 1 | 811  |  | 4.8  |
| 414 | Q86XW9 | Thioredoxin domain-containing protein 6 OS=Homo sapiens GN=NME9 PE=1 SV=1                        | 34.96 | 1 | 386  |  | 2.4  |

|     |        |                                                                                                                                     |       |   |      |  |      |
|-----|--------|-------------------------------------------------------------------------------------------------------------------------------------|-------|---|------|--|------|
| 415 | B3KRZ1 | cDNA FLJ35128 fis, clone PLACE6008768, moderately similar to Insulin-like growth factor-binding protein 3 OS=Homo sapiens PE=2 SV=1 | 34.82 | 1 | 437  |  | 15.4 |
| 416 | A0N4V7 | HCG2039797 (Fragment) OS=Homo sapiens GN=Tcr-alpha PE=4 SV=1                                                                        | 34.78 | 1 | 324  |  | 38.1 |
| 417 | E5RK99 | Collagen triple helix repeat-containing protein 1 OS=Homo sapiens GN=CTHRC1 PE=2 SV=1                                               | 34.77 | 1 | 1126 |  | 61.7 |
| 418 | P11388 | DNA topoisomerase 2-alpha OS=Homo sapiens GN=TOP2A PE=1 SV=3                                                                        | 34.77 | 1 | 247  |  | 4.4  |
| 419 | P16615 | Sarcoplasmic/endoplasmic reticulum calcium ATPase 2 OS=Homo sapiens GN=ATP2A2 PE=1 SV=1                                             | 34.73 | 1 | 786  |  | 5.1  |
|     | H7C5W9 | Sarcoplasmic/endoplasmic reticulum calcium ATPase 2 (Fragment) OS=Homo sapiens GN=ATP2A2 PE=3 SV=1                                  | 34.73 | 1 | 786  |  | 5.1  |
| 420 | Q567R0 | UQCRH protein OS=Homo sapiens GN=UQCRH PE=2 SV=1                                                                                    | 34.19 | 1 | 706  |  | 8.2  |
|     | P07919 | Cytochrome b-c1 complex subunit 6, mitochondrial OS=Homo sapiens GN=UQCRH PE=1 SV=2                                                 | 34.19 | 1 | 706  |  | 8.2  |
| 421 | Q15233 | Non-POU domain-containing octamer-binding protein OS=Homo sapiens GN=NONO PE=1 SV=4                                                 | 34.11 | 1 | 403  |  | 4.9  |
|     | A8K525 | cDNA FLJ76817, highly similar to Homo sapiens non-POU domain containing, octamer-binding (NONO), mRNA OS=Homo sapiens PE=2 SV=1     | 34.11 | 1 | 403  |  | 4.9  |
| 422 | Q9NQW1 | Protein transport protein Sec31B OS=Homo sapiens GN=SEC31B PE=1 SV=1                                                                | 34.06 | 1 | 54   |  | 29.5 |
| 423 | Q6DCA8 | BCLAF1 protein (Fragment) OS=Homo sapiens GN=BCLAF1 PE=2 SV=1                                                                       | 33.95 | 1 | 343  |  | 2.8  |
|     | E9PQN2 | Bcl-2-associated transcription factor 1 OS=Homo sapiens GN=BCLAF1 PE=2 SV=1                                                         | 33.95 | 1 | 343  |  | 2.8  |
|     | E9PKI6 | Bcl-2-associated transcription factor 1 OS=Homo sapiens GN=BCLAF1 PE=4 SV=1                                                         | 33.95 | 1 | 343  |  | 2.8  |
|     | E9PK09 | Bcl-2-associated transcription factor 1 (Fragment) OS=Homo sapiens GN=BCLAF1 PE=2 SV=1                                              | 33.95 | 1 | 343  |  | 2.8  |
| 424 | Q53H26 | Transferrin variant (Fragment) OS=Homo sapiens PE=2 SV=1                                                                            | 33.82 | 1 | 339  |  | 60.6 |
| 425 | O15347 | High mobility group protein B3 OS=Homo sapiens GN=HMGB3 PE=1 SV=4                                                                   | 33.81 | 1 | 680  |  | 11.4 |
|     | E7ES08 | High mobility group protein B3 (Fragment) OS=Homo sapiens GN=HMGB3 PE=2 SV=1                                                        | 33.81 | 1 | 680  |  | 11.4 |
|     | E7EQU1 | High mobility group protein B3 (Fragment) OS=Homo sapiens GN=HMGB3 PE=2 SV=1                                                        | 33.81 | 1 | 680  |  | 11.4 |
| 426 | Q8N8K9 | Uncharacterized protein KIAA1958 OS=Homo sapiens GN=KIAA1958 PE=1 SV=1                                                              | 33.75 | 1 | 1197 |  | 1.1  |
|     | B7ZKW6 | KIAA1958 protein OS=Homo sapiens GN=KIAA1958 PE=2 SV=1                                                                              | 33.75 | 1 | 1197 |  | 1.1  |
| 427 | Q8IWR8 | Ribosomal protein L19 (Fragment) OS=Homo sapiens PE=2 SV=1                                                                          | 33.32 | 1 | 486  |  | 15.5 |
|     | Q53G49 | Ribosomal protein L19 (Fragment) OS=Homo sapiens PE=2 SV=1                                                                          | 33.32 | 1 | 486  |  | 15.5 |

|     |        |                                                                                                                                                          |       |   |      |  |      |
|-----|--------|----------------------------------------------------------------------------------------------------------------------------------------------------------|-------|---|------|--|------|
|     | P84098 | 60S ribosomal protein L19 OS=Homo sapiens GN=RPL19 PE=1 SV=1                                                                                             | 33.32 | 1 | 486  |  | 15.5 |
|     | J3QR09 | Ribosomal protein L19 OS=Homo sapiens GN=RPL19 PE=3 SV=1                                                                                                 | 33.32 | 1 | 486  |  | 15.5 |
|     | J3KTE4 | Ribosomal protein L19 OS=Homo sapiens GN=RPL19 PE=3 SV=1                                                                                                 | 33.32 | 1 | 486  |  | 15.5 |
| 428 | O15400 | Syntaxin-7 OS=Homo sapiens GN=STX7 PE=1 SV=4                                                                                                             | 33.13 | 1 | 779  |  | 4.2  |
|     | B4DH37 | cDNA FLJ53760, highly similar to Syntaxin-7 OS=Homo sapiens PE=2 SV=1                                                                                    | 33.13 | 1 | 779  |  | 4.2  |
| 429 | P09936 | Ubiquitin carboxyl-terminal hydrolase isozyme L1 OS=Homo sapiens GN=UCHL1 PE=1 SV=2                                                                      | 33.09 | 1 | 763  |  | 3.6  |
|     | D6RE83 | Ubiquitin carboxyl-terminal hydrolase isozyme L1 OS=Homo sapiens GN=UCHL1 PE=2 SV=1                                                                      | 33.09 | 1 | 763  |  | 3.6  |
|     | B2RD14 | cDNA, FLJ96414, highly similar to Homo sapiens ubiquitin carboxyl-terminal esterase L1 (ubiquitin thiolesterase) (UCHL1), mRNA OS=Homo sapiens PE=2 SV=1 | 33.09 | 1 | 763  |  | 3.6  |
|     | A6NLJ7 | Ubiquitin carboxyl-terminal esterase L1 (Ubiquitin thiolesterase), isoform CRA_a OS=Homo sapiens GN=UCHL1 PE=2 SV=1                                      | 33.09 | 1 | 763  |  | 3.6  |
| 430 | P14854 | Cytochrome c oxidase subunit 6B1 OS=Homo sapiens GN=COX6B1 PE=1 SV=2                                                                                     | 32.91 | 1 | 498  |  | 17.5 |
| 431 | P35609 | Alpha-actinin-2 OS=Homo sapiens GN=ACTN2 PE=1 SV=1                                                                                                       | 32.74 | 1 | 985  |  | 5.7  |
| 432 | Q8WXI7 | Mucin-16 OS=Homo sapiens GN=MUC16 PE=1 SV=2                                                                                                              | 32.62 | 1 | 1060 |  | 8.7  |
| 433 | MOQZ39 | Upstream stimulatory factor 2 (Fragment) OS=Homo sapiens GN=USF2 PE=4 SV=1                                                                               | 32.58 | 1 | 800  |  | 14.2 |
| 434 | Q7Z3T9 | Putative uncharacterized protein DKFZp686J1169 OS=Homo sapiens GN=DKFZp686J1169 PE=2 SV=1                                                                | 32.52 | 1 | 245  |  | 1.3  |
|     | Q7LXB6 | Neuropilin 2 OS=Homo sapiens GN=NRP2 PE=2 SV=1                                                                                                           | 32.52 | 1 | 245  |  | 1.3  |
|     | O60462 | Neuropilin-2 OS=Homo sapiens GN=NRP2 PE=1 SV=2                                                                                                           | 32.52 | 1 | 245  |  | 1.3  |
|     | F5H2X3 | Neuropilin-2 OS=Homo sapiens GN=NRP2 PE=2 SV=1                                                                                                           | 32.52 | 1 | 245  |  | 1.3  |
|     | F5H1G4 | Neuropilin-2 OS=Homo sapiens GN=NRP2 PE=2 SV=1                                                                                                           | 32.52 | 1 | 245  |  | 1.3  |
|     | B7ZL68 | Neuropilin 2 OS=Homo sapiens GN=NRP2 PE=2 SV=1                                                                                                           | 32.52 | 1 | 245  |  | 1.3  |

**UniProt  
Human  
Protein  
IDs,  
cont.**

| Gr<br>p<br>Nr. | Accessio<br>n<br>Number | Protein Name | Prote<br>in<br>Scor<br>e | Uniqu<br>e<br>PSMs | PSM Serial Nrs. | Oth<br>er<br>Grp. | %<br>Seq.<br>Cove<br>r. |
|----------------|-------------------------|--------------|--------------------------|--------------------|-----------------|-------------------|-------------------------|
|----------------|-------------------------|--------------|--------------------------|--------------------|-----------------|-------------------|-------------------------|

|     |        |                                                                                                                           |       |   |      |  |      |
|-----|--------|---------------------------------------------------------------------------------------------------------------------------|-------|---|------|--|------|
| 435 | Q15366 | Poly(rC)-binding protein 2 OS=Homo sapiens GN=PCBP2 PE=1 SV=1                                                             | 32.52 | 1 | 60   |  | 6.9  |
|     | H3BRU6 | Poly(rC)-binding protein 2 (Fragment) OS=Homo sapiens GN=PCBP2 PE=4 SV=1                                                  | 32.52 | 1 | 60   |  | 6.9  |
|     | G3V0E8 | Poly(RC) binding protein 2, isoform CRA_f OS=Homo sapiens GN=PCBP2 PE=4 SV=1                                              | 32.52 | 1 | 60   |  | 6.9  |
|     | F8VZX2 | Poly(rC)-binding protein 2 OS=Homo sapiens GN=PCBP2 PE=2 SV=1                                                             | 32.52 | 1 | 60   |  | 6.9  |
|     | B4DXP5 | Poly(rC)-binding protein 2 OS=Homo sapiens GN=PCBP2 PE=2 SV=1                                                             | 32.52 | 1 | 60   |  | 6.9  |
|     | B4DRD7 | cDNA FLJ54752, highly similar to Poly(rC)-binding protein 2 OS=Homo sapiens PE=2 SV=1                                     | 32.52 | 1 | 60   |  | 6.9  |
| 436 | Q5U0A0 | Proteasome subunit alpha type OS=Homo sapiens PE=2 SV=1                                                                   | 32.47 | 1 | 195  |  | 7.9  |
|     | P28066 | Proteasome subunit alpha type-5 OS=Homo sapiens GN=PSMA5 PE=1 SV=3                                                        | 32.47 | 1 | 195  |  | 7.9  |
| 437 | Q92597 | Protein NDRG1 OS=Homo sapiens GN=NDRG1 PE=1 SV=1                                                                          | 32.39 | 1 | 674  |  | 3.9  |
|     | Q8N959 | cDNA FLJ38330 fis, clone FCBBF3025280, highly similar to NDRG1 PROTEIN OS=Homo sapiens PE=2 SV=1                          | 32.39 | 1 | 674  |  | 3.9  |
|     | Q597H1 | Transformation-related protein 14 OS=Homo sapiens GN=TRG14 PE=2 SV=1                                                      | 32.39 | 1 | 674  |  | 3.9  |
|     | Q53EU7 | N-myc downstream regulated gene 1 variant (Fragment) OS=Homo sapiens PE=2 SV=1                                            | 32.39 | 1 | 674  |  | 3.9  |
|     | E9PDL6 | Protein NDRG1 OS=Homo sapiens GN=NDRG1 PE=2 SV=2                                                                          | 32.39 | 1 | 674  |  | 3.9  |
|     | E7ESM1 | Protein NDRG1 OS=Homo sapiens GN=NDRG1 PE=2 SV=1                                                                          | 32.39 | 1 | 674  |  | 3.9  |
|     | E5RJY1 | Protein NDRG1 OS=Homo sapiens GN=NDRG1 PE=2 SV=1                                                                          | 32.39 | 1 | 674  |  | 3.9  |
|     | B7Z5Z7 | cDNA FLJ53648, highly similar to Protein NDRG1 OS=Homo sapiens PE=2 SV=1                                                  | 32.39 | 1 | 674  |  | 3.9  |
|     | B7Z505 | cDNA FLJ53637, highly similar to Protein NDRG1 OS=Homo sapiens PE=2 SV=1                                                  | 32.39 | 1 | 674  |  | 3.9  |
|     | B7Z4H0 | cDNA FLJ59927, moderately similar to Protein NDRG1 OS=Homo sapiens PE=2 SV=1                                              | 32.39 | 1 | 674  |  | 3.9  |
| 438 | Q96L21 | 60S ribosomal protein L10-like OS=Homo sapiens GN=RPL10L PE=1 SV=3                                                        | 31.68 | 1 | 285  |  | 55.8 |
|     | P27635 | 60S ribosomal protein L10 OS=Homo sapiens GN=RPL10 PE=1 SV=4                                                              | 31.68 | 1 | 285  |  | 55.8 |
| 439 | Q99497 | Protein DJ-1 OS=Homo sapiens GN=PARK7 PE=1 SV=2                                                                           | 31.35 | 1 | 587  |  | 33.1 |
|     | K7ELW0 | Protein DJ-1 OS=Homo sapiens GN=PARK7 PE=4 SV=1                                                                           | 31.35 | 1 | 587  |  | 33.1 |
| 440 | P61812 | Transforming growth factor beta-2 OS=Homo sapiens GN=TGFB2 PE=1 SV=1                                                      | 31.02 | 1 | 1127 |  | 4.6  |
|     | B2R7T2 | cDNA, FLJ93591, highly similar to Homo sapiens transforming growth factor, beta 2 (TGFB2), mRNA OS=Homo sapiens PE=2 SV=1 | 31.02 | 1 | 1127 |  | 4.6  |
| 441 | Q9NRL2 | Bromodomain adjacent to zinc finger domain protein 1A OS=Homo sapiens GN=BAZ1A PE=1 SV=2                                  | 30.99 | 1 | 726  |  | 3.2  |

|     |        |                                                                                                                                                     |       |   |      |  |     |
|-----|--------|-----------------------------------------------------------------------------------------------------------------------------------------------------|-------|---|------|--|-----|
|     | Q59G54 | Bromodomain adjacent to zinc finger domain, 1A isoform b variant (Fragment) OS=Homo sapiens PE=2 SV=1                                               | 30.99 | 1 | 726  |  | 3.2 |
|     | D3DS96 | Bromodomain adjacent to zinc finger domain, 1A, isoform CRA_c OS=Homo sapiens GN=BAZ1A PE=2 SV=1                                                    | 30.99 | 1 | 726  |  | 3.2 |
|     | B3KND8 | cDNA FLJ14383 fis, clone HEMBA1002035, highly similar to Bromodomain adjacent to zinc finger domain protein 1A OS=Homo sapiens PE=2 SV=1            | 30.99 | 1 | 726  |  | 3.2 |
| 442 | Q53GL5 | Isocitrate dehydrogenase [NADP] (Fragment) OS=Homo sapiens PE=2 SV=1                                                                                | 30.95 | 1 | 855  |  | 2.5 |
|     | Q13584 | Isocitrate dehydrogenase [NADP] OS=Homo sapiens PE=2 SV=1                                                                                           | 30.95 | 1 | 855  |  | 2.5 |
|     | P48735 | Isocitrate dehydrogenase [NADP], mitochondrial OS=Homo sapiens GN=IDH2 PE=1 SV=2                                                                    | 30.95 | 1 | 855  |  | 2.5 |
|     | B4DFL2 | Isocitrate dehydrogenase [NADP] OS=Homo sapiens GN=IDH2 PE=2 SV=1                                                                                   | 30.95 | 1 | 855  |  | 2.5 |
| 443 | Q96MU7 | YTH domain-containing protein 1 OS=Homo sapiens GN=YTHDC1 PE=1 SV=3                                                                                 | 30.95 | 1 | 767  |  | 2.7 |
|     | J3QR07 | YTH domain-containing protein 1 OS=Homo sapiens GN=YTHDC1 PE=4 SV=1                                                                                 | 30.95 | 1 | 767  |  | 2.7 |
| 444 | Q6NUR7 | Ezrin OS=Homo sapiens GN=EZR PE=2 SV=1                                                                                                              | 30.36 | 1 | 649  |  | 7.2 |
|     | P15311 | Ezrin OS=Homo sapiens GN=EZR PE=1 SV=4                                                                                                              | 30.36 | 1 | 649  |  | 7.2 |
|     | E7EQR4 | Ezrin OS=Homo sapiens GN=EZR PE=2 SV=2                                                                                                              | 30.36 | 1 | 649  |  | 7.2 |
|     | B7Z5V2 | cDNA FLJ54141, highly similar to Ezrin OS=Homo sapiens PE=2 SV=1                                                                                    | 30.36 | 1 | 649  |  | 7.2 |
|     | B7Z437 | cDNA FLJ53435, highly similar to Ezrin OS=Homo sapiens PE=2 SV=1                                                                                    | 30.36 | 1 | 649  |  | 7.2 |
|     | B2R6J2 | cDNA, FLJ92973, highly similar to Homo sapiens villin 2 (ezrin) (VIL2), mRNA OS=Homo sapiens PE=2 SV=1                                              | 30.36 | 1 | 649  |  | 7.2 |
| 445 | O14974 | Protein phosphatase 1 regulatory subunit 12A OS=Homo sapiens GN=PPP1R12A PE=1 SV=1                                                                  | 30.36 | 1 | 698  |  | 3.7 |
|     | H0YHI8 | Protein phosphatase 1 regulatory subunit 12A (Fragment) OS=Homo sapiens GN=PPP1R12A PE=4 SV=1                                                       | 30.36 | 1 | 698  |  | 3.7 |
|     | B2RAH5 | cDNA, FLJ94919, highly similar to Homo sapiens protein phosphatase 1, regulatory (inhibitor) subunit 12A (PPP1R12A), mRNA OS=Homo sapiens PE=2 SV=1 | 30.36 | 1 | 698  |  | 3.7 |
| 446 | Q5U077 | L-lactate dehydrogenase OS=Homo sapiens GN=LDHB PE=2 SV=1                                                                                           | 30.36 | 1 | 49   |  | 6.3 |
|     | P07195 | L-lactate dehydrogenase B chain OS=Homo sapiens GN=LDHB PE=1 SV=2                                                                                   | 30.36 | 1 | 49   |  | 6.3 |
| 447 | P55060 | Exportin-2 OS=Homo sapiens GN=CSE1L PE=1 SV=3                                                                                                       | 30.10 | 1 | 1169 |  | 2.1 |
|     | F8W904 | Exportin-2 OS=Homo sapiens GN=CSE1L PE=2 SV=1                                                                                                       | 30.10 | 1 | 1169 |  | 2.1 |
|     | A3RLL6 | Cellular apoptosis susceptibility protein variant 2 OS=Homo sapiens GN=CSE1L-2 PE=2 SV=1                                                            | 30.10 | 1 | 1169 |  | 2.1 |
| 448 | Q96M42 | Putative uncharacterized protein encoded by LINC00479 OS=Homo sapiens GN=LINC00479 PE=5 SV=2                                                        | 30.10 | 1 | 723  |  | 4.9 |

|     |        |                                                                                                                                                                                                                                  |       |   |     |  |     |
|-----|--------|----------------------------------------------------------------------------------------------------------------------------------------------------------------------------------------------------------------------------------|-------|---|-----|--|-----|
| 449 | Q6ZWH5 | Serine/threonine-protein kinase Nek10 OS=Homo sapiens<br>GN=NEK10 PE=2 SV=3                                                                                                                                                      | 30.10 | 1 | 400 |  | 5.8 |
| 450 | Q9UQM3 | Alpha-tubulin (Fragment) OS=Homo sapiens PE=2 SV=1                                                                                                                                                                               | 30.06 | 1 | 490 |  | 1.8 |
|     | Q9BQE3 | Tubulin alpha-1C chain OS=Homo sapiens GN=TUBA1C PE=1<br>SV=1                                                                                                                                                                    | 30.06 | 1 | 490 |  | 1.8 |
|     | Q71U36 | Tubulin alpha-1A chain OS=Homo sapiens GN=TUBA1A PE=1<br>SV=1                                                                                                                                                                    | 30.06 | 1 | 490 |  | 1.8 |
|     | Q53GA7 | Tubulin alpha 6 variant (Fragment) OS=Homo sapiens PE=2<br>SV=1                                                                                                                                                                  | 30.06 | 1 | 490 |  | 1.8 |
|     | Q1ZYQ1 | Tubulin, alpha 2 OS=Homo sapiens GN=TUBA2 PE=2 SV=1                                                                                                                                                                              | 30.06 | 1 | 490 |  | 1.8 |
|     | Q13748 | Tubulin alpha-3C/D chain OS=Homo sapiens GN=TUBA3C<br>PE=1 SV=3                                                                                                                                                                  | 30.06 | 1 | 490 |  | 1.8 |
|     | P68366 | Tubulin alpha-4A chain OS=Homo sapiens GN=TUBA4A PE=1<br>SV=1                                                                                                                                                                    | 30.06 | 1 | 490 |  | 1.8 |
|     | P68363 | Tubulin alpha-1B chain OS=Homo sapiens GN=TUBA1B PE=1<br>SV=1                                                                                                                                                                    | 30.06 | 1 | 490 |  | 1.8 |
|     | G3V1U9 | Tubulin alpha-1A chain OS=Homo sapiens GN=TUBA1A PE=3<br>SV=1                                                                                                                                                                    | 30.06 | 1 | 490 |  | 1.8 |
|     | F8VXZ4 | Tubulin alpha-1A chain OS=Homo sapiens GN=TUBA1A PE=2<br>SV=1                                                                                                                                                                    | 30.06 | 1 | 490 |  | 1.8 |
| 451 | Q9UMX0 | Ubiquilin-1 OS=Homo sapiens GN=UBQLN1 PE=1 SV=2                                                                                                                                                                                  | 29.98 | 1 | 731 |  | 2.5 |
|     | B3KNI8 | cDNA FLJ14670 fis, clone NT2RP2003272, highly similar to<br>Ubiquilin-1 OS=Homo sapiens PE=2 SV=1                                                                                                                                | 29.98 | 1 | 731 |  | 2.5 |
|     | B3KNI2 | cDNA FLJ14650 fis, clone NT2RP2002185, highly similar to<br>Ubiquilin-1 OS=Homo sapiens PE=2 SV=1                                                                                                                                | 29.98 | 1 | 731 |  | 2.5 |
| 452 | P42765 | 3-ketoacyl-CoA thiolase, mitochondrial OS=Homo sapiens<br>GN=ACAA2 PE=1 SV=2                                                                                                                                                     | 29.56 | 1 | 636 |  | 3.3 |
|     | K7EME0 | 3-ketoacyl-CoA thiolase, mitochondrial OS=Homo sapiens<br>GN=ACAA2 PE=3 SV=1                                                                                                                                                     | 29.56 | 1 | 636 |  | 3.3 |
|     | B3KNP8 | cDNA FLJ30111 fis, clone BNGH42000360, highly similar to<br>3-ketoacyl-CoA thiolase, mitochondrial (EC 2.3.1.16)<br>OS=Homo sapiens PE=2 SV=1                                                                                    | 29.56 | 1 | 636 |  | 3.3 |
|     | B2RB23 | cDNA, FLJ95265, highly similar to Homo sapiens acetyl-<br>Coenzyme A acyltransferase 2 (mitochondrial 3-oxoacyl-<br>Coenzyme A thiolase) (ACAA2), nuclear gene encoding<br>mitochondrial protein, mRNA OS=Homo sapiens PE=2 SV=1 | 29.56 | 1 | 636 |  | 3.3 |
| 453 | E5RGS7 | Uncharacterized protein OS=Homo sapiens PE=2 SV=1                                                                                                                                                                                | 29.26 | 1 | 993 |  | 7.5 |
|     | B3KPU0 | cDNA FLJ32186 fis, clone PLACE6002011, highly similar to<br>PDZ and LIM domain protein 2 OS=Homo sapiens PE=2<br>SV=1                                                                                                            | 29.26 | 1 | 993 |  | 7.5 |
| 454 | Q5SSV3 | N(G),N(G)-dimethylarginine dimethylaminohydrolase 2<br>(Fragment) OS=Homo sapiens GN=DDAH2 PE=4 SV=1                                                                                                                             | 29.18 | 1 | 876 |  | 8.0 |
|     | Q5SRR8 | N(G),N(G)-dimethylarginine dimethylaminohydrolase 2<br>(Fragment) OS=Homo sapiens GN=DDAH2 PE=4 SV=2                                                                                                                             | 29.18 | 1 | 876 |  | 8.0 |
|     | O95865 | N(G),N(G)-dimethylarginine dimethylaminohydrolase 2<br>OS=Homo sapiens GN=DDAH2 PE=1 SV=1                                                                                                                                        | 29.18 | 1 | 876 |  | 8.0 |

|     |        |                                                                                                   |       |   |     |  |      |
|-----|--------|---------------------------------------------------------------------------------------------------|-------|---|-----|--|------|
|     | H0Y7N1 | N(G),N(G)-dimethylarginine dimethylaminohydrolase 2 (Fragment) OS=Homo sapiens GN=DDAH2 PE=4 SV=1 | 29.18 | 1 | 876 |  | 8.0  |
|     | A3KGN5 | N(G),N(G)-dimethylarginine dimethylaminohydrolase 2 (Fragment) OS=Homo sapiens GN=DDAH2 PE=2 SV=1 | 29.18 | 1 | 876 |  | 8.0  |
| 455 | O75944 | Aconitase (Fragment) OS=Homo sapiens GN=ACON PE=2 SV=1                                            | 28.54 | 1 | 76  |  | 5.5  |
| 456 | Q86W61 | VCAN protein OS=Homo sapiens GN=VCAN PE=2 SV=1                                                    | 28.37 | 1 | 451 |  | 12.5 |
|     | Q59FG9 | Chondroitin sulfate proteoglycan 2 (Versican) variant (Fragment) OS=Homo sapiens PE=2 SV=1        | 28.37 | 1 | 451 |  | 12.5 |
|     | P13611 | Versican core protein OS=Homo sapiens GN=VCAN PE=1 SV=3                                           | 28.37 | 1 | 451 |  | 35.9 |
|     | E9PF17 | Versican core protein OS=Homo sapiens GN=VCAN PE=2 SV=2                                           | 28.37 | 1 | 451 |  | 12.5 |
|     | D6RGZ6 | Versican core protein (Fragment) OS=Homo sapiens GN=VCAN PE=2 SV=1                                | 28.37 | 1 | 451 |  | 61.7 |
| 457 | Q71V99 | Peptidyl-prolyl cis-trans isomerase OS=Homo sapiens PE=2 SV=1                                     | 28.19 | 1 | 892 |  | 35.4 |
| 458 | Q9UNX3 | 60S ribosomal protein L26-like 1 OS=Homo sapiens GN=RPL26L1 PE=1 SV=1                             | 28.01 | 1 | 659 |  | 15.2 |
|     | Q6IBH6 | RPL26 protein OS=Homo sapiens GN=RPL26 PE=2 SV=1                                                  | 28.01 | 1 | 659 |  | 15.2 |
|     | P61254 | 60S ribosomal protein L26 OS=Homo sapiens GN=RPL26 PE=1 SV=1                                      | 28.01 | 1 | 659 |  | 15.2 |
|     | J3QRI7 | 60S ribosomal protein L26 (Fragment) OS=Homo sapiens GN=RPL26 PE=4 SV=1                           | 28.01 | 1 | 659 |  | 15.2 |
|     | J3QQV1 | 60S ribosomal protein L26 OS=Homo sapiens GN=RPL26 PE=4 SV=1                                      | 28.01 | 1 | 659 |  | 15.2 |
|     | J3QQQ9 | KRAB-A domain-containing protein 2 OS=Homo sapiens GN=KRBA2 PE=4 SV=1                             | 28.01 | 1 | 659 |  | 15.2 |
|     | J3KTJ8 | 60S ribosomal protein L26 (Fragment) OS=Homo sapiens GN=RPL26 PE=4 SV=1                           | 28.01 | 1 | 659 |  | 15.2 |
|     | E5RIT6 | 60S ribosomal protein L26-like 1 (Fragment) OS=Homo sapiens GN=RPL26L1 PE=2 SV=1                  | 28.01 | 1 | 659 |  | 15.2 |
| 459 | Q13765 | Nascent polypeptide-associated complex subunit alpha OS=Homo sapiens GN=NACA PE=1 SV=1            | 27.94 | 1 | 797 |  | 5.2  |
|     | H0YHX9 | Nascent polypeptide-associated complex subunit alpha (Fragment) OS=Homo sapiens GN=NACA PE=2 SV=1 | 27.94 | 1 | 797 |  | 5.2  |
|     | F8W1N5 | Nascent polypeptide-associated complex subunit alpha (Fragment) OS=Homo sapiens GN=NACA PE=2 SV=1 | 27.94 | 1 | 797 |  | 5.2  |
|     | F8W0W4 | Nascent polypeptide-associated complex subunit alpha (Fragment) OS=Homo sapiens GN=NACA PE=2 SV=1 | 27.94 | 1 | 797 |  | 5.2  |
|     | F8VZJ2 | Nascent polypeptide-associated complex subunit alpha OS=Homo sapiens GN=NACA PE=2 SV=1            | 27.94 | 1 | 797 |  | 5.2  |
|     | F8VZ58 | Nascent polypeptide-associated complex subunit alpha (Fragment) OS=Homo sapiens GN=NACA PE=2 SV=1 | 27.94 | 1 | 797 |  | 5.2  |
|     | F8VNW4 | Nascent polypeptide-associated complex subunit alpha (Fragment) OS=Homo sapiens GN=NACA PE=2 SV=1 | 27.94 | 1 | 797 |  | 5.2  |



|        |                                                                                           |       |   |     |  |     |
|--------|-------------------------------------------------------------------------------------------|-------|---|-----|--|-----|
| E9PAV3 | Nascent polypeptide-associated complex subunit alpha<br>OS=Homo sapiens GN=NACA PE=2 SV=1 | 27.94 | 1 | 797 |  | 5.2 |
| B2R4P8 | HCG2016482, isoform CRA_b OS=Homo sapiens<br>GN=hCG_2016482 PE=2 SV=1                     | 27.94 | 1 | 797 |  | 5.2 |

**UniProt  
Human  
Protein  
IDs,  
cont.**

| Gr<br>p<br>Nr. | Accession<br>Number | Protein Name                                                                                          | Protein<br>Score | Unique<br>PSMs | PSM Serial Nrs. | Other<br>Grp. | %<br>Seq.<br>Cover. |
|----------------|---------------------|-------------------------------------------------------------------------------------------------------|------------------|----------------|-----------------|---------------|---------------------|
| 460            | O00479              | High mobility group nucleosome-binding domain-containing protein 4 OS=Homo sapiens GN=HMGN4 PE=1 SV=3 | 27.76            | 1              | 988             |               | 37.8                |
| 461            | Q08380              | Galectin-3-binding protein OS=Homo sapiens GN=LGALS3BP PE=1 SV=1                                      | 27.47            | 1              | 711             |               | 4.7                 |
|                | B4DVE1              | cDNA FLJ53478, highly similar to Galectin-3-binding protein OS=Homo sapiens PE=2 SV=1                 | 27.47            | 1              | 711             |               | 4.7                 |
| 462            | P25398              | 40S ribosomal protein S12 OS=Homo sapiens GN=RPS12 PE=1 SV=3                                          | 27.27            | 1              | 544             |               | 18.9                |
| 463            | Q07654              | Trefoil factor 3 OS=Homo sapiens GN=TFF3 PE=1 SV=1                                                    | 27.12            | 1              | 331             |               | 28.8                |
| 464            | Q9UMS4              | Pre-mRNA-processing factor 19 OS=Homo sapiens GN=PRPF19 PE=1 SV=1                                     | 26.26            | 1              | 32              |               | 6.0                 |
|                | F5H2I0              | Pre-mRNA-processing factor 19 (Fragment) OS=Homo sapiens GN=PRPF19 PE=2 SV=1                          | 26.26            | 1              | 32              |               | 6.0                 |
|                | F5GY56              | Pre-mRNA-processing factor 19 (Fragment) OS=Homo sapiens GN=PRPF19 PE=2 SV=1                          | 26.26            | 1              | 32              |               | 6.0                 |
| 465            | Q7Z434              | Mitochondrial antiviral-signaling protein OS=Homo sapiens GN=MAVS PE=1 SV=2                           | 26.19            | 1              | 432             |               | 2.4                 |
| 466            | Q96T88              | E3 ubiquitin-protein ligase UHRF1 OS=Homo sapiens GN=UHRF1 PE=1 SV=1                                  | 26.16            | 1              | 48              |               | 3.4                 |
| 467            | P60866              | 40S ribosomal protein S20 OS=Homo sapiens GN=RPS20 PE=1 SV=1                                          | 25.92            | 1              | 923             |               | 18.8                |
|                | G3XAN0              | 40S ribosomal protein S20 OS=Homo sapiens GN=RPS20 PE=4 SV=1                                          | 25.92            | 1              | 923             |               | 18.8                |
| 468            | C9JB55              | Serotransferrin (Fragment) OS=Homo sapiens GN=TF PE=2 SV=1                                            | 25.77            | 1              | 1131            |               | 31.6                |
| 469            | F6TR96              | TRIO and F-actin-binding protein (Fragment) OS=Homo sapiens GN=TRIOBP PE=2 SV=1                       | 25.67            | 1              | 494             |               | 4.2                 |
| 470            | Q59H49              | Polypyrimidine tract-binding protein 1 isoform c variant (Fragment) OS=Homo sapiens PE=2 SV=1         | 25.65            | 1              | 1141            |               | 11.4                |

|     |        |                                                                                               |       |   |      |  |      |
|-----|--------|-----------------------------------------------------------------------------------------------|-------|---|------|--|------|
|     | P26599 | Polypyrimidine tract-binding protein 1 OS=Homo sapiens GN=PTBP1 PE=1 SV=1                     | 25.65 | 1 | 1141 |  | 11.4 |
|     | K7ES59 | Polypyrimidine tract-binding protein 1 (Fragment) OS=Homo sapiens GN=PTBP1 PE=4 SV=1          | 25.65 | 1 | 1141 |  | 11.4 |
|     | K7ELW5 | Polypyrimidine tract-binding protein 1 (Fragment) OS=Homo sapiens GN=PTBP1 PE=4 SV=1          | 25.65 | 1 | 1141 |  | 11.4 |
|     | K7EKJ7 | Polypyrimidine tract-binding protein 1 (Fragment) OS=Homo sapiens GN=PTBP1 PE=4 SV=1          | 25.65 | 1 | 1141 |  | 11.4 |
| 471 | Q13151 | Heterogeneous nuclear ribonucleoprotein A0 OS=Homo sapiens GN=HNRNPA0 PE=1 SV=1               | 25.35 | 1 | 218  |  | 7.9  |
| 472 | O75822 | Eukaryotic translation initiation factor 3 subunit J OS=Homo sapiens GN=EIF3J PE=1 SV=2       | 25.21 | 1 | 964  |  | 3.9  |
|     | F5H425 | Eukaryotic translation initiation factor 3 subunit J OS=Homo sapiens GN=EIF3J PE=2 SV=1       | 25.21 | 1 | 964  |  | 3.9  |
|     | B4DUI3 | Eukaryotic translation initiation factor 3 subunit J OS=Homo sapiens GN=EIF3J PE=2 SV=1       | 25.21 | 1 | 964  |  | 3.9  |
| 473 | E9PD68 | Dihydropyrimidinase-related protein 1 OS=Homo sapiens GN=CRMP1 PE=2 SV=1                      | 25.17 | 1 | 653  |  | 8.4  |
| 474 | O95750 | Fibroblast growth factor 19 OS=Homo sapiens GN=FGF19 PE=1 SV=1                                | 25.17 | 1 | 565  |  | 7.4  |
| 475 | A5A3E0 | POTE ankyrin domain family member F OS=Homo sapiens GN=POTEF PE=1 SV=2                        | 24.99 | 1 | 883  |  | 4.4  |
| 476 | P41219 | Peripherin OS=Homo sapiens GN=PRPH PE=1 SV=2                                                  | 24.81 | 1 | 593  |  | 29.6 |
|     | B3KWQ6 | cDNA FLJ43599 fis, clone SMINT2017781, highly similar to PERIPHERIN OS=Homo sapiens PE=2 SV=1 | 24.81 | 1 | 593  |  | 6.0  |
| 477 | P16070 | CD44 antigen OS=Homo sapiens GN=CD44 PE=1 SV=3                                                | 24.71 | 1 | 174  |  | 4.2  |
|     | H0YDX6 | CD44 antigen (Fragment) OS=Homo sapiens GN=CD44 PE=4 SV=1                                     | 24.71 | 1 | 174  |  | 4.2  |
|     | H0YDW7 | CD44 antigen (Fragment) OS=Homo sapiens GN=CD44 PE=2 SV=1                                     | 24.71 | 1 | 174  |  | 4.2  |
|     | H0YD17 | CD44 antigen (Fragment) OS=Homo sapiens GN=CD44 PE=4 SV=1                                     | 24.71 | 1 | 174  |  | 4.2  |
|     | H0YD13 | CD44 antigen (Fragment) OS=Homo sapiens GN=CD44 PE=2 SV=1                                     | 24.71 | 1 | 174  |  | 4.2  |
|     | H0YCV9 | CD44 antigen (Fragment) OS=Homo sapiens GN=CD44 PE=2 SV=1                                     | 24.71 | 1 | 174  |  | 4.2  |
|     | H0Y5E4 | CD44 antigen (Fragment) OS=Homo sapiens GN=CD44 PE=4 SV=1                                     | 24.71 | 1 | 174  |  | 4.2  |
|     | H0Y2P0 | CD44 antigen (Fragment) OS=Homo sapiens GN=CD44 PE=2 SV=1                                     | 24.71 | 1 | 174  |  | 4.2  |
|     | E7EPC6 | CD44 antigen OS=Homo sapiens GN=CD44 PE=2 SV=2                                                | 24.71 | 1 | 174  |  | 4.2  |
|     | C1PHC4 | CD44 molecule (Fragment) OS=Homo sapiens GN=CD44 PE=2 SV=1                                    | 24.71 | 1 | 174  |  | 4.2  |
| 478 | I6L997 | GRIA2 protein (Fragment) OS=Homo sapiens GN=GRIA2 PE=2 SV=1                                   | 24.70 | 1 | 1128 |  | 0.8  |

|     |        |                                                                                                                                                                     |       |   |     |  |      |
|-----|--------|---------------------------------------------------------------------------------------------------------------------------------------------------------------------|-------|---|-----|--|------|
| 479 | O14745 | Na(+)/H(+) exchange regulatory cofactor NHE-RF1 OS=Homo sapiens GN=SLC9A3R1 PE=1 SV=4                                                                               | 24.68 | 1 | 662 |  | 2.8  |
|     | J3QRP6 | Na(+)/H(+) exchange regulatory cofactor NHE-RF1 (Fragment) OS=Homo sapiens GN=SLC9A3R1 PE=4 SV=1                                                                    | 24.68 | 1 | 662 |  | 2.8  |
|     | B2R6A3 | cDNA, FLJ92860, highly similar to Homo sapiens solute carrier family 9 (sodium/hydrogen exchanger), member 3 regulator 1 (SLC9A3R1), mRNA OS=Homo sapiens PE=2 SV=1 | 24.68 | 1 | 662 |  | 2.8  |
| 480 | O75367 | Core histone macro-H2A.1 OS=Homo sapiens GN=H2AFY PE=1 SV=4                                                                                                         | 24.59 | 1 | 453 |  | 8.3  |
| 481 | Q6PKH8 | ANP32A protein (Fragment) OS=Homo sapiens GN=ANP32A PE=2 SV=1                                                                                                       | 24.52 | 1 | 599 |  | 7.9  |
|     | Q1AHP8 | Hepatopoietin PCn127 OS=Homo sapiens PE=2 SV=1                                                                                                                      | 24.52 | 1 | 599 |  | 7.9  |
|     | Q08AJ6 | ANP32A protein OS=Homo sapiens GN=ANP32A PE=2 SV=1                                                                                                                  | 24.52 | 1 | 599 |  | 7.9  |
|     | P39687 | Acidic leucine-rich nuclear phosphoprotein 32 family member A OS=Homo sapiens GN=ANP32A PE=1 SV=1                                                                   | 24.52 | 1 | 599 |  | 7.9  |
|     | H0YN26 | Acidic leucine-rich nuclear phosphoprotein 32 family member A OS=Homo sapiens GN=ANP32A PE=2 SV=1                                                                   | 24.52 | 1 | 599 |  | 7.9  |
| 482 | Q53GS9 | U4/U6.U5 tri-snRNP-associated protein 2 OS=Homo sapiens GN=USP39 PE=1 SV=2                                                                                          | 24.49 | 1 | 503 |  | 2.3  |
|     | G5E9H0 | U4/U6.U5 tri-snRNP-associated protein 2 OS=Homo sapiens GN=USP39 PE=4 SV=1                                                                                          | 24.49 | 1 | 503 |  | 2.3  |
|     | F8WC91 | U4/U6.U5 tri-snRNP-associated protein 2 OS=Homo sapiens GN=USP39 PE=2 SV=1                                                                                          | 24.49 | 1 | 503 |  | 2.3  |
|     | B9A018 | U4/U6.U5 tri-snRNP-associated protein 2 OS=Homo sapiens GN=USP39 PE=2 SV=1                                                                                          | 24.49 | 1 | 503 |  | 2.3  |
|     | B8ZZD1 | U4/U6.U5 tri-snRNP-associated protein 2 OS=Homo sapiens GN=USP39 PE=2 SV=1                                                                                          | 24.49 | 1 | 503 |  | 2.3  |
|     | B3KM40 | cDNA FLJ10185 fis, clone HEMBA1004509, highly similar to U4/U6.U5 tri-snRNP-associated protein 2 OS=Homo sapiens PE=2 SV=1                                          | 24.49 | 1 | 503 |  | 2.3  |
| 483 | Q6IAX6 | 3~-phosphoadenosine 5~-phosphosulfate synthase 1 OS=Homo sapiens GN=PAPSS1 PE=2 SV=1                                                                                | 24.38 | 1 | 454 |  | 8.3  |
|     | O43252 | Bifunctional 3~-phosphoadenosine 5~-phosphosulfate synthase 1 OS=Homo sapiens GN=PAPSS1 PE=1 SV=2                                                                   | 24.38 | 1 | 454 |  | 34.8 |
| 484 | Q8TEA6 | CDNA FLJ23731 fis, clone HEP14545 OS=Homo sapiens PE=2 SV=1                                                                                                         | 24.36 | 1 | 288 |  | 3.5  |
|     | Q8NFH3 | Nucleoporin Nup43 OS=Homo sapiens GN=NUP43 PE=1 SV=1                                                                                                                | 24.36 | 1 | 288 |  | 3.5  |
|     | B3KTT0 | cDNA FLJ38675 fis, clone IMR322000243, highly similar to Nucleoporin Nup43 OS=Homo sapiens PE=2 SV=1                                                                | 24.36 | 1 | 288 |  | 3.5  |
|     | A0PJK4 | NUP43 protein (Fragment) OS=Homo sapiens GN=NUP43 PE=2 SV=1                                                                                                         | 24.36 | 1 | 288 |  | 3.5  |
| 485 | Q15459 | Splicing factor 3A subunit 1 OS=Homo sapiens GN=SF3A1 PE=1 SV=1                                                                                                     | 23.99 | 1 | 133 |  | 1.7  |

|     |        |                                                                                                                                    |       |   |     |  |      |
|-----|--------|------------------------------------------------------------------------------------------------------------------------------------|-------|---|-----|--|------|
|     | E9PAW1 | Splicing factor 3A subunit 1 OS=Homo sapiens GN=SF3A1 PE=2 SV=1                                                                    | 23.99 | 1 | 133 |  | 1.7  |
|     | B4E091 | cDNA FLJ55438, highly similar to Splicing factor 3 subunit 1 OS=Homo sapiens PE=2 SV=1                                             | 23.99 | 1 | 133 |  | 1.7  |
| 486 | Q96PU4 | E3 ubiquitin-protein ligase UHRF2 OS=Homo sapiens GN=UHRF2 PE=1 SV=1                                                               | 23.98 | 1 | 749 |  | 12.6 |
| 487 | P55145 | Mesencephalic astrocyte-derived neurotrophic factor OS=Homo sapiens GN=MANF PE=1 SV=3                                              | 23.58 | 1 | 272 |  | 11.3 |
|     | H7C2D6 | Mesencephalic astrocyte-derived neurotrophic factor (Fragment) OS=Homo sapiens GN=MANF PE=4 SV=1                                   | 23.58 | 1 | 272 |  | 11.3 |
|     | A8K878 | cDNA FLJ77177, highly similar to Homo sapiens arginine-rich, mutated in early stage tumors (ARMET), mRNA OS=Homo sapiens PE=2 SV=1 | 23.58 | 1 | 272 |  | 11.3 |
| 488 | P62917 | 60S ribosomal protein L8 OS=Homo sapiens GN=RPL8 PE=1 SV=2                                                                         | 23.49 | 1 | 131 |  | 36.8 |
|     | G3V1A1 | 60S ribosomal protein L8 OS=Homo sapiens GN=RPL8 PE=4 SV=1                                                                         | 23.49 | 1 | 131 |  | 36.8 |
|     | E9PKZ0 | 60S ribosomal protein L8 OS=Homo sapiens GN=RPL8 PE=4 SV=1                                                                         | 23.49 | 1 | 131 |  | 36.8 |
|     | B4DVG7 | cDNA FLJ53750, highly similar to 60S ribosomal protein L8 OS=Homo sapiens PE=2 SV=1                                                | 23.49 | 1 | 131 |  | 36.8 |
| 489 | Q15843 | NEDD8 OS=Homo sapiens GN=NEDD8 PE=1 SV=1                                                                                           | 23.11 | 1 | 588 |  | 18.0 |
|     | F8VSA6 | NEDD8 OS=Homo sapiens GN=NEDD8 PE=4 SV=1                                                                                           | 23.11 | 1 | 588 |  | 18.0 |
|     | E9PS38 | Protein NEDD8-MDP1 OS=Homo sapiens GN=NEDD8-MDP1 PE=2 SV=1                                                                         | 23.11 | 1 | 588 |  | 18.0 |
|     | E9PL57 | Protein NEDD8-MDP1 (Fragment) OS=Homo sapiens GN=NEDD8-MDP1 PE=2 SV=1                                                              | 23.11 | 1 | 588 |  | 18.0 |
| 490 | Q8VWM7 | Ataxin-2-like protein OS=Homo sapiens GN=ATXN2L PE=1 SV=2                                                                          | 22.63 | 1 | 475 |  | 41.1 |
|     | Q63ZY4 | ATXN2L protein OS=Homo sapiens GN=ATXN2L PE=2 SV=1                                                                                 | 22.63 | 1 | 475 |  | 41.1 |
|     | H3BUF6 | Ataxin-2-like protein OS=Homo sapiens GN=ATXN2L PE=2 SV=1                                                                          | 22.63 | 1 | 475 |  | 12.7 |
| 491 | Q6IAW5 | CALU protein OS=Homo sapiens GN=CALU PE=2 SV=1                                                                                     | 22.56 | 1 | 951 |  | 4.1  |
|     | O43852 | Calumenin OS=Homo sapiens GN=CALU PE=1 SV=2                                                                                        | 22.56 | 1 | 951 |  | 4.1  |
|     | B3KQF5 | cDNA FLJ90381 fis, clone NT2RP2005035, highly similar to Calumenin OS=Homo sapiens PE=2 SV=1                                       | 22.56 | 1 | 951 |  | 4.1  |
|     | B3KNG6 | cDNA FLJ14554 fis, clone NT2RM2001839, highly similar to Calumenin OS=Homo sapiens PE=2 SV=1                                       | 22.56 | 1 | 951 |  | 4.1  |
| 492 | Q15819 | Ubiquitin-conjugating enzyme E2 variant 2 OS=Homo sapiens GN=UBE2V2 PE=1 SV=4                                                      | 22.50 | 1 | 955 |  | 22.1 |
|     | H0YBP9 | Ubiquitin-conjugating enzyme E2 variant 2 (Fragment) OS=Homo sapiens GN=UBE2V2 PE=4 SV=1                                           | 22.50 | 1 | 955 |  | 22.1 |
|     | G3V113 | Ubiquitin-conjugating enzyme E2 variant 2 OS=Homo sapiens GN=UBE2V2 PE=4 SV=1                                                      | 22.50 | 1 | 955 |  | 22.1 |
|     | A0M8W4 | Ubiquitin-conjugating enzyme E2 variant 2 OS=Homo sapiens GN=UBE2V2 PE=2 SV=1                                                      | 22.50 | 1 | 955 |  | 22.1 |

|     |        |                                                                                                                                                     |       |   |      |  |      |
|-----|--------|-----------------------------------------------------------------------------------------------------------------------------------------------------|-------|---|------|--|------|
| 493 | B7Z6N2 | cDNA FLJ56154, highly similar to Gelsolin OS=Homo sapiens PE=2 SV=1                                                                                 | 22.47 | 1 | 419  |  | 18.4 |
| 494 | P27824 | Calnexin OS=Homo sapiens GN=CANX PE=1 SV=2                                                                                                          | 21.87 | 1 | 404  |  | 1.9  |
|     | B4E2T8 | Calnexin OS=Homo sapiens GN=CANX PE=2 SV=1                                                                                                          | 21.87 | 1 | 404  |  | 1.9  |
|     | B4DGP8 | Calnexin OS=Homo sapiens GN=CANX PE=2 SV=1                                                                                                          | 21.87 | 1 | 404  |  | 1.9  |
| 495 | Q14151 | Scaffold attachment factor B2 OS=Homo sapiens GN=SAFB2 PE=1 SV=1                                                                                    | 21.56 | 1 | 55   |  | 4.5  |
| 496 | Q8N355 | IGL@ protein OS=Homo sapiens GN=IGL@ PE=2 SV=1                                                                                                      | 21.26 | 1 | 950  |  | 11.1 |
| 497 | Q59GL1 | Synaptotagmin binding, cytoplasmic RNA interacting protein variant (Fragment) OS=Homo sapiens PE=2 SV=1                                             | 20.80 | 1 | 22   |  | 6.4  |
|     | Q05CK9 | SYNCRIP protein (Fragment) OS=Homo sapiens GN=SYNCRIP PE=2 SV=1                                                                                     | 20.80 | 1 | 22   |  | 6.4  |
|     | O60506 | Heterogeneous nuclear ribonucleoprotein Q OS=Homo sapiens GN=SYNCRIP PE=1 SV=2                                                                      | 20.80 | 1 | 22   |  | 6.4  |
|     | B7Z645 | Synaptotagmin binding, cytoplasmic RNA interacting protein, isoform CRA_b OS=Homo sapiens GN=SYNCRIP PE=2 SV=1                                      | 20.80 | 1 | 22   |  | 6.4  |
|     | B2R8Z8 | cDNA, FLJ94136, highly similar to Homo sapiens synaptotagmin binding, cytoplasmic RNA interacting protein (SYNCRIP), mRNA OS=Homo sapiens PE=2 SV=1 | 20.80 | 1 | 22   |  | 6.4  |
| 498 | Q9BTQ7 | Similar to ribosomal protein L23 (Fragment) OS=Homo sapiens PE=2 SV=1                                                                               | 20.75 | 1 | 620  |  | 13.4 |
|     | P62829 | 60S ribosomal protein L23 OS=Homo sapiens GN=RPL23 PE=1 SV=1                                                                                        | 20.75 | 1 | 620  |  | 13.4 |
| 499 | H0YB22 | 40S ribosomal protein S14 (Fragment) OS=Homo sapiens GN=RPS14 PE=4 SV=1                                                                             | 20.54 | 1 | 384  |  | 23.3 |
| 500 | Q13813 | Spectrin alpha chain, non-erythrocytic 1 OS=Homo sapiens GN=SPTAN1 PE=1 SV=3                                                                        | 20.22 | 1 | 885  |  | 4.6  |
|     | B4DGT1 | cDNA FLJ59116, highly similar to Spectrin alpha chain, brain OS=Homo sapiens PE=2 SV=1                                                              | 20.22 | 1 | 885  |  | 4.6  |
|     | A6NG51 | Spectrin alpha chain, non-erythrocytic 1 OS=Homo sapiens GN=SPTAN1 PE=2 SV=2                                                                        | 20.22 | 1 | 885  |  | 4.6  |
| 501 | F5H0B0 | Tumor protein D52 OS=Homo sapiens GN=TPD52 PE=2 SV=1                                                                                                | 20.04 | 1 | 1021 |  | 14.7 |
|     | A5Y5A3 | PC1/MRPS28 fusion protein OS=Homo sapiens PE=2 SV=1                                                                                                 | 20.04 | 1 | 1021 |  | 14.7 |

**Note: Number of proteins per group  $\leq 10$ .**

*Group Nr.*

By the rule of parsimony, we have gathered all proteins sharing the same identified peptides into a single group.

*Accession Nr.*

The accession number from the searched database (DB).

*Protein Name*

The protein name in the DB.

*Protein Score*

Sum of the contributing peptide scores.

NOTE: This score can only be used to support the identification of **one** protein per group.  
*Unique PSMs.*

The number of unique peptide-spectrum matches that contribute to the protein assignment.  
*PSM Serial Nrs.*

Sequential number of assigned peptide (in the following table.)  
*Other Grp.*

If the protein is assigned to another group, that (those) group number(s).  
*% Seq. Cover.*

Percent sequence coverage of this protein.

## Assigned Peptides

| #  | Sequence                       | PTM Site                        | Nr. Scans | Mascot Score | Expectation | Isolated Mass | Delta Mass | Charge State | Matched Ions | Scan Nr. |
|----|--------------------------------|---------------------------------|-----------|--------------|-------------|---------------|------------|--------------|--------------|----------|
| 1  | R.GELAIKDANAK.L                |                                 | 2         | 29.900       | 0.18        | 565.32        | 2.7        | 2            | '8/20        | 2222     |
| 2  | R.IVLQIDNAR.L                  |                                 | 3         | 36.330       | 0.018       | 521.31        | -2.2       | 2            | '7/16        | 3317     |
| 3  | K.CSTSSLLEACTFRRP.-            |                                 | 8         | 35.450       | 0.033       | 595.62        | 0.6        | 3            | '7/28        | 4184     |
| 4  | K.QAASGLVGQENAR.E              |                                 | 1         | 64.290       | 5.4e-005    | 650.83        | 0.1        | 2            | '10/24       | 1903     |
| 5  | K.DCHLAQVPSHTVVAR.S            |                                 | 12        | 60.080       | 0.00015     | 845.43        | -2.5       | 2            | '21/28       | 3175     |
| 6  | R.LQNALNEQR.V                  |                                 | 2         | 51.060       | 0.00082     | 543.29        | 0.2        | 2            | '8/16        | 1707     |
| 7  | R.QINWTVLYR.R                  |                                 | 1         | 44.280       | 0.0055      | 596.83        | 1.1        | 2            | '6/16        | 5138     |
| 8  | R.SLGQNPTAEALR.D               |                                 | 1         | 62.950       | 6.2e-005    | 657.84        | -0.8       | 2            | '7/22        | 2690     |
| 9  | R.NLLSVAYKNVGGQR.A             |                                 | 2         | 87.270       | 1.7e-007    | 809.46        | 0.6        | 2            | '10/28       | 5568     |
| 10 | R.QTTQDAPEEVR.N                |                                 | 1         | 38.190       | 0.014       | 637.30        | 0.5        | 2            | '6/20        | 1247     |
| 11 | R.HQGMVGMGQKDSYV<br>GDEAQSKR.G | 0.00001001000000000000<br>000.0 | 3         | 41.680       | 0.017       | 635.55        | -1.1       | 4            | '22/44       | 3160     |
| 12 | R.GDVTAEAAAGASPAK.A            |                                 | 1         | 63.940       | 2.9e-005    | 687.33        | -4.6       | 2            | '10/28       | 1657     |
| 13 | R.YCAGWADKIQR.T                |                                 | 1         | 38.830       | 0.014       | 475.56        | -0.6       | 3            | '13/22       | 3903     |
| 14 | R.SGRGGNFGFGDSR.G              |                                 | 1         | 24.260       | 0.26        | 438.54        | 0.5        | 3            | '10/24       | 3295     |
| 15 | R.LSKEEVER.M                   |                                 | 2         | 39.760       | 0.018       | 495.27        | 2.3        | 2            | '6/14        | 1673     |

|    |                                 |  |   |        |          |             |      |   |        |      |
|----|---------------------------------|--|---|--------|----------|-------------|------|---|--------|------|
| 16 | R.IINEPTAAAIYGLDKK.V            |  | 1 | 26.130 | 0.23     | 596.67      | -0.7 | 3 | '12/32 | 4557 |
| 17 | K.LGNYAGAVQDCER.A               |  | 1 | 60.840 | 5.7e-005 | 726.83      | -1.2 | 2 | '9/24  | 2501 |
| 18 | K.YQIDPDACFSAK.V                |  | 1 | 37.540 | 0.01     | 707.82      | -2.2 | 2 | '10/22 | 3626 |
| 19 | K.EACVHKILR.Q                   |  | 2 | 28.150 | 0.2      | 375.88      | -3.2 | 3 | '6/16  | 3433 |
| 20 | K.FFVGGNWK.M                    |  | 3 | 23.770 | 0.37     | 477.75      | 0.2  | 2 | '7/14  | 4485 |
| 21 | K.RVLIAAHGNSLR.G                |  | 1 | 20.430 | 0.37     | 436.26      | 3.2  | 3 | '9/22  | 3952 |
| 22 | K.VADSSKGPDEAKIK.A              |  | 1 | 20.800 | 1.5      | 361.95      | 0.0  | 4 | '17/26 | 2027 |
| 23 | K.INHCRFDEFFSEGCAPG<br>SK.K     |  | 2 | 19.750 | 0.31     | 565.25      | -4.5 | 4 | '13/36 | 5532 |
| 24 | K.AAATPESQEPQAK.G               |  | 1 | 41.210 | 0.008    | 664.33      | 1.6  | 2 | '9/24  | 1037 |
| 25 | K.SRLEQEIATYR.S                 |  | 1 | 23.390 | 0.67     | 455.91      | 2.4  | 3 | '13/20 | 4374 |
| 26 | K.AADPPAENSSAPEAEQ<br>GGAE.-    |  | 1 | 80.720 | 1.8e-007 | 949.41      | 0.0  | 2 | '21/38 | 1661 |
| 27 | R.LVQGSILKK.V                   |  | 1 | 30.170 | 0.029    | 329.22      | -1.0 | 3 | '6/16  | 2909 |
| 28 | K.STELLIR.K                     |  | 2 | 37.120 | 0.031    | 416.25      | 0.7  | 2 | '10/12 | 3008 |
| 29 | R.RVLQALEGLK.M                  |  | 1 | 54.960 | 0.00015  | 563.85      | 2.4  | 2 | '6/18  | 4991 |
| 30 | K.EDLPAENGETK.T                 |  | 1 | 52.400 | 0.00028  | 601.78      | -1.8 | 2 | '7/20  | 1415 |
| 31 | R.GGNFGFGDSR.G                  |  | 1 | 47.870 | 0.00096  | 507.23      | -0.9 | 2 | '7/18  | 2942 |
| 32 | R.QELSHALYQHDAACR.V             |  | 1 | 26.260 | 0.2      | 450.46      | -0.1 | 4 | '7/28  | 3457 |
| 33 | K.IKTLFPLIEAK.K                 |  | 1 | 31.710 | 0.013    | 424.94      | -1.0 | 3 | '6/20  | 5637 |
| 34 | R.TLEGELHDLRGQVAK.L             |  | 1 | 26.060 | 0.33     | 555.97      | 2.6  | 3 | '9/28  | 4797 |
| 35 | K.VVFEQTK.V                     |  | 3 | 24.640 | 0.48     | 425.74      | 0.1  | 2 | '5/12  | 1847 |
| 36 | K.DGGAWGTEQR.E                  |  | 1 | 44.070 | 0.0014   | 538.74      | 0.2  | 2 | '8/18  | 1872 |
| 37 | R.VDCDQHS DIAQR.Y               |  | 2 | 70.990 | 3.8e-006 | 722.32      | 0.8  | 2 | '15/22 | 1489 |
| 38 | R.LELQGPR.G                     |  | 1 | 34.040 | 0.029    | 406.73      | -0.2 | 2 | '6/12  | 2239 |
| 39 | K.CKAHDQLLLNYAK.K               |  | 1 | 40.830 | 0.012    | 568.29      | 0.9  | 3 | '18/26 | 4816 |
| 40 | R.ARQLEELR.T                    |  | 1 | 35.610 | 0.076    | 381.88      | -0.2 | 3 | '9/16  | 2982 |
| 41 | R.TSNEVQYDQR.L                  |  | 1 | 49.720 | 0.00058  | 620.28      | -2.0 | 2 | '6/18  | 1199 |
| 42 | K.TLGDFAAEYAK.S                 |  | 1 | 56.270 | 0.00032  | 593.29      | -3.3 | 2 | '7/20  | 4110 |
| 43 | R.AQYDELAR.K                    |  | 2 | 36.760 | 0.023    | 483.24      | -1.1 | 2 | '6/14  | 2118 |
| 44 | K.EVYQQQYQSGGR.G                |  | 1 | 52.970 | 0.0004   | 750.35      | 1.9  | 2 | '9/24  | 1669 |
| 45 | R.LGSQLEASAH.-                  |  | 1 | 63.740 | 3.7e-005 | 506.76      | -2.1 | 2 | '9/18  | 1871 |
| 46 | R.SGVNSELVKR.I                  |  | 2 | 43.620 | 0.0079   | 363.54      | -0.3 | 3 | '12/18 | 2212 |
| 47 | R.STGKGIVEFASKPAAR.K            |  | 1 | 29.880 | 0.12     | 405.48      | 0.2  | 4 | '12/30 | 3812 |
| 48 | R.TAEQSCDQKLTNTNR.A             |  | 1 | 26.160 | 0.22     | 589.28      | -0.5 | 3 | '15/28 | 1548 |
| 49 | R.GLTSVINQK.L                   |  | 1 | 30.360 | 0.15     | 480.28      | 3.2  | 2 | '5/16  | 2698 |
| 50 | K.TSTSPPEKSGDEGSED<br>EAPSGED.- |  | 2 | 21.370 | 0.054    | 1202.9<br>9 | -0.7 | 2 | '12/46 | 1424 |
| 51 | R.KQSLGELIGTLNAAK.V             |  | 2 | 30.550 | 0.069    | 514.97      | 0.3  | 3 | '8/28  | 5464 |
| 52 | R.CLYASVLTAQPR.L                |  | 1 | 55.540 | 0.00042  | 689.86      | 2.6  | 2 | '9/22  | 4160 |



|    |                                  |  |    |             |          |        |      |   |        |      |
|----|----------------------------------|--|----|-------------|----------|--------|------|---|--------|------|
| 53 | R.NLLSVAYKNVGGRR.S               |  | 2  | 29.260      | 0.073    | 549.32 | 0.1  | 3 | '16/28 | 5644 |
| 54 | R.KNEPIIK.V                      |  | 2  | 34.060      | 0.028    | 421.26 | 0.2  | 2 | '6/12  | 2406 |
| 55 | K.DQDELKPGPTNR.S                 |  | 1  | 21.560      | 0.78     | 457.23 | 0.3  | 3 | '5/22  | 1753 |
| 56 | R.LNLQTGER.E                     |  | 1  | 39.680      | 0.02     | 465.75 | -0.3 | 2 | '7/14  | 1942 |
| 57 | K.DLLFKDSAHGFLK.V                |  | 2  | 45.220      | 0.0044   | 497.60 | -1.0 | 3 | '8/24  | 5502 |
| 58 | R.AVQFTEEK.F                     |  | 1  | 41.390      | 0.0091   | 476.24 | 1.5  | 2 | '7/14  | 1755 |
| 59 | K.GPSSVEDIK.A                    |  | 1  | 52.650      | 0.00077  | 466.24 | -4.8 | 2 | '7/16  | 1677 |
| 60 | K.IANPVEGSTDR.Q                  |  | 1  | 32.520      | 0.065    | 579.79 | 2.2  | 2 | '8/20  | 1954 |
| 61 | R.AALPEGLPEASR.L                 |  | 1  | 36.580      | 0.035    | 605.83 | 1.1  | 2 | '9/22  | 3174 |
| 62 | R.IGGNEGIDVPIPR.F                |  | 1  | 29.170      | 0.17     | 668.86 | -5.9 | 2 | '10/24 | 4132 |
| 63 | K.ADDGRPFQVIK.S                  |  | 1  | 28.110      | 0.25     | 448.24 | 0.8  | 3 | '20/22 | 3726 |
| 64 | R.ISISTSGGSFR.N                  |  | 1  | 51.560      | 0.00087  | 556.29 | -0.1 | 2 | '9/20  | 3061 |
| 65 | K.KLNVTEQEKIDK.L                 |  | 2  | 46.290      | 0.0032   | 482.27 | -0.4 | 3 | '9/22  | 2742 |
| 66 | M.PSKGPLQSVQVFR.K                |  | 1  | 36.140      | 0.03     | 500.62 | -0.6 | 3 | '5/26  | 4855 |
| 67 | R.AAEDDEDVDTQKQKT<br>DEDD.-      |  | 3  | 75.810      | 2.2e-007 | 799.66 | 15.0 | 3 | '12/40 | 1356 |
| 68 | M.GKVKGVNGFGR.I                  |  | 1  | 21.890      | 0.46     | 406.58 | -0.2 | 3 | '6/22  | 3607 |
| 69 | M.GVQVETISPGDGR.T                |  | 1  | 64.720      | 4.4e-005 | 657.84 | 0.5  | 2 | '10/24 | 2510 |
| 70 | R.IEEELGDEAR.F                   |  | 1  | 50.220      | 0.00064  | 580.77 | -0.3 | 2 | '8/18  | 2058 |
| 71 | K.TLNNKFASFIDKVR.F               |  | 14 | 42.060      | 0.0061   | 551.64 | 0.1  | 3 | '15/26 | 5602 |
| 72 | K.YNQLLR.I                       |  | 2  | 26.510      | 0.34     | 403.73 | 0.5  | 2 | '4/10  | 2340 |
| 73 | R.IINEPTAAAIYGLDKR.E             |  | 1  | 35.720      | 0.028    | 606.00 | -0.6 | 3 | '15/32 | 4702 |
| 74 | R.ESLSEEAQK.M                    |  | 1  | 44.480      | 0.0027   | 575.27 | -0.7 | 2 | '8/18  | 1214 |
| 75 | R.ASAVSELSR.E                    |  | 1  | 74.160      | 7.9e-006 | 508.77 | -1.1 | 2 | '9/18  | 2327 |
| 76 | K.HPNGTQETILLNHTFNET<br>QIEWFR.A |  | 2  | 28.540      | 0.16     | 732.11 | 0.5  | 4 | '31/46 | 6197 |
| 77 | K.TIDDLEDK.L                     |  | 4  | 24.330      | 0.67     | 474.73 | 0.1  | 2 | '4/14  | 1978 |
| 78 | K.VFLENVIR.D                     |  | 1  | 48.610      | 0.0014   | 495.29 | 1.3  | 2 | '7/14  | 4715 |
| 79 | K.NPDPWAK.N                      |  | 2  | 25.140      | 0.23     | 414.21 | 0.2  | 2 | '5/12  | 2359 |
| 80 | K.SNEEGSEEKGEVR.E                |  | 2  | 63.710      | 2.5e-005 | 773.85 | 1.2  | 2 | '9/26  | 1472 |
| 81 | K.ELGITALHIK.L                   |  | 4  | 20.000      | 0.43     | 365.56 | 0.3  | 3 | '11/18 | 4558 |
| 82 | R.DTDTGALLFIGK.I                 |  | 1  | 80.210      | 1.4e-006 | 625.84 | -0.1 | 2 | '17/22 | 5259 |
| 83 | K.DLEEAEEYKEAR.L                 |  | 1  | 72.340      | 5.5e-006 | 741.34 | -0.6 | 2 | '9/22  | 2412 |
| 84 | K.VSELKEELK.K                    |  | 1  | 27.860      | 0.27     | 358.87 | -0.5 | 3 | '9/16  | 2828 |
| 85 | R.QSSATSSFGGLGGSV<br>R.F         |  | 1  | 125.83<br>0 | 3.6e-011 | 777.88 | -0.3 | 2 | '12/32 | 3080 |
| 86 | K.ADGIVSKNF.-                    |  | 1  | 46.350      | 0.0033   | 475.75 | 0.4  | 2 | '8/16  | 2957 |
| 87 | K.DSYSSRDYPSSR.D                 |  | 1  | 28.590      | 0.047    | 473.88 | 0.1  | 3 | '11/22 | 1496 |
| 88 | R.VAPEEHPVLLTEAPLNP<br>K.A       |  | 2  | 37.290      | 0.018    | 652.03 | -0.9 | 3 | '16/34 | 4676 |
| 89 | K.YGTDLSR.G                      |  | 2  | 38.750      | 0.0096   | 406.20 | 0.7  | 2 | '6/12  | 1483 |

|     |                                   |                                  |   |             |          |        |       |   |        |      |
|-----|-----------------------------------|----------------------------------|---|-------------|----------|--------|-------|---|--------|------|
| 90  | K.NVLINKDIR.C                     |                                  | 1 | 19.980      | 0.79     | 362.22 | 0.8   | 3 | '7/16  | 3204 |
| 91  | K.ALAAGGYDVEKNNSR.I               |                                  | 2 | 97.390      | 2.8e-008 | 782.89 | -0.4  | 2 | '12/28 | 2496 |
| 92  | K.GAEAANVTGPGGVPVQ<br>GSK.Y       |                                  | 1 | 106.06<br>0 | 4.7e-009 | 848.44 | -1.2  | 2 | '17/36 | 2324 |
| 93  | K.AVIQHFQEK.V                     |                                  | 1 | 20.170      | 1.2      | 367.20 | 1.0   | 3 | '11/16 | 2785 |
| 94  | R.ILENEKDLEEAEEYK.E               |                                  | 1 | 43.640      | 0.0051   | 617.96 | -3.6  | 3 | '8/28  | 3679 |
| 95  | K.ESEAVEWQQK.A                    |                                  | 1 | 43.250      | 0.0037   | 617.29 | -3.5  | 2 | '6/18  | 2218 |
| 96  | R.VEFPR.S                         |                                  | 1 | 26.110      | 0.42     | 324.18 | 0.2   | 2 | '4/8   | 2207 |
| 97  | K.KSCHTAVGR.T                     |                                  | 2 | 35.950      | 0.025    | 339.17 | -0.6  | 3 | '8/16  | 1710 |
| 98  | K.CAQGCICKGTSDKCSCC<br>A.-        |                                  | 1 | 32.830      | 0.00052  | 708.27 | -0.3  | 3 | '21/34 | 2071 |
| 99  | R.VEFPR.T                         |                                  | 1 | 26.110      | 0.42     | 324.18 | 0.2   | 2 | '4/8   | 2207 |
| 100 | R.VADLTGIR.D                      |                                  | 1 | 36.590      | 0.044    | 422.74 | -12.7 | 2 | '4/14  | 1850 |
| 101 | K.EVDYSGLR.V                      |                                  | 1 | 37.160      | 0.034    | 469.73 | 0.0   | 2 | '6/14  | 2409 |
| 102 | R.EGTCPEAPTDECKPVKW<br>CALSHHER.L |                                  | 2 | 28.720      | 0.096    | 749.34 | -0.9  | 4 | '19/48 | 4728 |
| 103 | R.ISCTIANR.C                      |                                  | 1 | 48.130      | 0.0028   | 467.74 | -0.6  | 2 | '7/14  | 1519 |
| 104 | K.IKSVGGACVLVA.-                  |                                  | 1 | 38.490      | 0.021    | 587.34 | 0.3   | 2 | '8/22  | 3808 |
| 105 | R.LKCDEWSVNSVGK.I                 |                                  | 6 | 73.100      | 7.4e-006 | 761.37 | -0.4  | 2 | '10/24 | 3345 |
| 106 | K.CDSSPDSAEDVRK.V                 |                                  | 2 | 46.740      | 0.0004   | 489.21 | -0.1  | 3 | '16/24 | 1162 |
| 107 | K.TIDDLEETLASAK.E                 |                                  | 1 | 89.820      | 1.4e-007 | 703.36 | -1.4  | 2 | '11/24 | 4733 |
| 108 | R.TKSTGGAPTfnVTk.T                |                                  | 1 | 41.170      | 0.013    | 536.96 | 1.2   | 3 | '9/30  | 3134 |
| 109 | R.DGYGSRDSYSSSR.S                 |                                  | 1 | 45.120      | 0.00063  | 498.55 | 0.3   | 3 | '15/26 | 1561 |
| 110 | K.KALAAAGYDVEKNNSR.I              |                                  | 2 | 65.350      | 4.9e-005 | 569.63 | 0.2   | 3 | '20/30 | 2979 |
| 111 | R.CKELGITALHIK.L                  |                                  | 2 | 28.470      | 0.11     | 346.45 | -0.7  | 4 | '11/22 | 4745 |
| 112 | K.CDSSPDSAEDVR.K                  |                                  | 2 | 78.710      | 1.9e-007 | 669.27 | 4.0   | 2 | '9/22  | 1205 |
| 113 | R.AFFSEVER.R                      |                                  | 1 | 52.100      | 0.00046  | 492.74 | 0.9   | 2 | '7/14  | 3759 |
| 114 | R.ELEEISERLEEAGGATS<br>VQIEMNK.K  | 0.00000000000000000000<br>0100.0 | 4 | 70.510      | 8.9e-006 | 893.43 | -2.0  | 3 | '26/46 | 5056 |
| 115 | K.RASGQAFELILSPR.S                |                                  | 1 | 37.230      | 0.024    | 515.62 | -1.1  | 3 | '10/26 | 5386 |
| 116 | R.VNQAIWLLCTGAR.E                 |                                  | 1 | 59.620      | 0.00018  | 751.40 | -2.8  | 2 | '8/24  | 5332 |
| 117 | K.AALEEVER.L                      |                                  | 1 | 45.770      | 0.0042   | 458.74 | 0.0   | 2 | '7/14  | 1958 |
| 118 | K.LHDRNTYEKYLGEYVK.<br>A          |                                  | 6 | 36.750      | 0.03     | 719.69 | -0.6  | 3 | '22/32 | 5039 |
| 119 | K.TIDDLEEK.L                      |                                  | 2 | 34.760      | 0.048    | 481.74 | 0.4   | 2 | '6/14  | 1979 |
| 120 | R.DAIAQAVR.G                      |                                  | 2 | 57.210      | 0.00023  | 422.24 | -0.1  | 2 | '6/14  | 1977 |
| 121 | K.QSTDEEVTSLAK.S                  |                                  | 1 | 83.960      | 5.3e-007 | 654.32 | 6.5   | 2 | '9/22  | 2445 |
| 122 | K.SQIPLSK.I                       |                                  | 1 | 22.150      | 1.3      | 386.73 | 1.0   | 2 | '4/12  | 1940 |
| 123 | K.YEELQSLAGKHGDDLRR<br>.T         |                                  | 2 | 22.030      | 0.95     | 497.51 | 0.8   | 4 | '17/32 | 4116 |
| 124 | K.LLSLTQAK.E                      |                                  | 1 | 30.170      | 0.069    | 437.28 | 13.6  | 2 | '4/14  | 2911 |

|     |                              |  |   |        |          |        |      |   |        |      |
|-----|------------------------------|--|---|--------|----------|--------|------|---|--------|------|
| 125 | K.DAALATALGDKK.S             |  | 1 | 60.030 | 0.0003   | 587.33 | -0.9 | 2 | '8/22  | 2879 |
| 126 | K.LSELLR.Y                   |  | 1 | 29.590 | 0.25     | 365.73 | 0.3  | 2 | '4/10  | 2851 |
| 127 | R.VLQALEGLK.M                |  | 1 | 49.400 | 0.00084  | 485.80 | -2.3 | 2 | '7/16  | 4052 |
| 128 | R.EYEAALNSK.D                |  | 1 | 56.490 | 0.00024  | 512.75 | -0.6 | 2 | '7/16  | 1622 |
| 129 | K.DSGFQMNQLR.G               |  | 3 | 56.880 | 0.00016  | 598.28 | -3.1 | 2 | '8/18  | 3468 |
| 130 | R.RYQKSTELLIR.K              |  | 2 | 41.470 | 0.0043   | 469.61 | -0.6 | 3 | '6/20  | 4454 |
| 131 | K.GIVKDIHDPGRGAPLAK.V        |  | 1 | 23.490 | 0.21     | 465.02 | 0.6  | 4 | '18/34 | 5684 |
| 132 | R.QSVFPFESGKPFK.I            |  | 1 | 41.050 | 0.011    | 499.93 | 0.7  | 3 | '6/24  | 5248 |
| 133 | K.IGEEIIQKPEEK.V             |  | 1 | 23.990 | 0.49     | 476.91 | -1.0 | 3 | '12/22 | 2034 |
| 134 | K.SLAGSSGPGASSGTSGDHGELVVR.I |  | 1 | 46.640 | 0.0025   | 729.02 | -1.3 | 3 | '15/46 | 3341 |
| 135 | R.LSKEDIER.M                 |  | 4 | 50.010 | 0.0017   | 495.27 | 2.3  | 2 | '7/14  | 1673 |
| 136 | K.DKEACVHKILR.Q              |  | 6 | 47.480 | 0.0021   | 456.92 | 0.1  | 3 | '8/20  | 3638 |
| 137 | K.AVDITTPK.A                 |  | 1 | 54.400 | 0.00073  | 422.74 | 0.7  | 2 | '5/14  | 1850 |
| 138 | R.VAEQAANDLR.A               |  | 2 | 29.150 | 0.16     | 543.78 | -0.1 | 2 | '9/18  | 1764 |
| 139 | K.NQLTSNPENTVFDK.R           |  | 2 | 90.450 | 1.8e-007 | 839.41 | -1.6 | 2 | '11/28 | 3497 |
| 140 | R.SSTPLTISSAENTR.Q           |  | 1 | 78.940 | 5.4e-006 | 824.41 | -1.7 | 2 | '12/30 | 3005 |
| 141 | K.TTSPLEEEER.E               |  | 1 | 48.270 | 0.0013   | 595.78 | 1.1  | 2 | '8/18  | 1920 |
| 142 | R.KLVIIEGDLER.T              |  | 4 | 63.080 | 4.6e-005 | 642.88 | -2.3 | 2 | '7/20  | 4551 |
| 143 | R.LQSIGTENTEENRR.F           |  | 1 | 25.150 | 0.56     | 549.61 | -0.2 | 3 | '7/26  | 2032 |
| 144 | R.ISQATAQIK.N                |  | 1 | 43.850 | 0.007    | 480.28 | -0.5 | 2 | '8/16  | 1408 |
| 145 | R.SSDCASGLCCAR.H             |  | 1 | 69.350 | 6.2e-007 | 672.26 | 0.3  | 2 | '8/22  | 1544 |
| 146 | K.KGTVEGFEPADNKLLR.A         |  | 2 | 52.670 | 0.0009   | 645.33 | -0.2 | 3 | '19/32 | 4178 |
| 147 | R.TFSWASVTSK.N               |  | 1 | 24.000 | 0.39     | 557.28 | 1.7  | 2 | '6/18  | 4141 |
| 148 | K.DYELLCLDGTRK.S             |  | 2 | 44.330 | 0.0064   | 741.87 | -1.1 | 2 | '8/22  | 4399 |
| 149 | R.QLEELR.T                   |  | 1 | 34.000 | 0.062    | 458.74 | -0.4 | 2 | '6/12  | 2204 |
| 150 | R.VLVNDAQKVTEGQQR.L          |  | 1 | 46.620 | 0.0029   | 605.32 | -0.6 | 3 | '18/30 | 2732 |
| 151 | R.IADGYEQAAR.V               |  | 1 | 72.880 | 7.8e-006 | 547.27 | 2.4  | 2 | '9/18  | 1750 |
| 152 | R.IGHRYIEIFK.S               |  | 2 | 24.860 | 0.4      | 425.91 | -0.7 | 3 | '8/18  | 5727 |
| 153 | R.LTEGCSFR.R                 |  | 1 | 38.610 | 0.009    | 485.23 | -0.5 | 2 | '7/14  | 1912 |
| 154 | R.VLVEQQQDR.A                |  | 1 | 42.870 | 0.0065   | 557.80 | -1.3 | 2 | '7/16  | 1549 |
| 155 | K.CNKEVYFAER.V               |  | 1 | 25.580 | 0.2      | 439.21 | 0.6  | 3 | '7/18  | 3052 |
| 156 | R.SIGVVEEK.V                 |  | 1 | 40.200 | 0.023    | 430.74 | -0.2 | 2 | '7/14  | 1802 |
| 157 | K.AEEYTEETEER.E              |  | 1 | 71.650 | 1e-006   | 693.29 | -1.8 | 2 | '7/20  | 1452 |
| 158 | K.AYAALAALEK.L               |  | 1 | 66.800 | 2.6e-005 | 510.79 | 0.3  | 2 | '13/18 | 4074 |
| 159 | R.SVSLTGAPESVQK.A            |  | 2 | 51.740 | 0.0012   | 651.85 | -2.6 | 2 | '10/24 | 2474 |
| 160 | K.LQAELEGIK.R                |  | 1 | 35.240 | 0.044    | 500.79 | -0.6 | 2 | '6/16  | 3078 |
| 161 | K.VEIIANDQGNR.T              |  | 5 | 66.110 | 3.2e-005 | 614.82 | -0.2 | 2 | '8/20  | 2085 |

|     |                                 |  |   |        |          |        |      |   |        |      |
|-----|---------------------------------|--|---|--------|----------|--------|------|---|--------|------|
| 162 | K.VEQATKPSFESGR.R               |  | 1 | 30.670 | 0.12     | 479.24 | -1.9 | 3 | '10/24 | 1991 |
| 163 | R.GLFIIDDKGILR.Q                |  | 2 | 29.640 | 0.064    | 453.94 | -1.0 | 3 | '7/22  | 5762 |
| 164 | R.EDGNEEDKENQGDETQ<br>GQPPQRR.Y |  | 3 | 37.200 | 0.0077   | 696.81 | -0.7 | 4 | '12/46 | 1389 |
| 165 | K.NAGVEGSLIVEK.I                |  | 1 | 47.470 | 0.0031   | 608.33 | 0.0  | 2 | '8/22  | 3088 |
| 166 | K.AIKEQATKPSFESGR.R             |  | 1 | 28.230 | 0.2      | 437.74 | 2.7  | 4 | '14/30 | 3132 |
| 167 | R.VEVGKDQFTVDTR.G               |  | 1 | 22.830 | 2.2      | 541.61 | 4.6  | 3 | '9/26  | 2917 |
| 168 | K.SESPKEPEQLR.K                 |  | 2 | 39.500 | 0.014    | 433.89 | 0.1  | 3 | '13/20 | 1934 |
| 169 | K.TENLLGSYFPK.K                 |  | 1 | 60.100 | 0.00027  | 634.83 | -3.7 | 2 | '8/20  | 5024 |
| 170 | K.LVTDLTK.V                     |  | 5 | 42.480 | 0.0066   | 395.24 | -1.0 | 2 | '6/12  | 2289 |
| 171 | R.VIVCNTKLDNNWGR.E              |  | 1 | 38.190 | 0.024    | 563.62 | -1.0 | 3 | '13/26 | 3697 |
| 172 | R.IEANEALVK.A                   |  | 1 | 57.950 | 0.00026  | 493.78 | 0.2  | 2 | '8/16  | 2246 |
| 173 | R.IVAPGKILAADESTGSI<br>AKR.L    |  | 1 | 21.620 | 0.37     | 514.30 | -0.3 | 4 | '19/40 | 4739 |
| 174 | R.YGFIEGHVVIPR.I                |  | 1 | 24.710 | 0.52     | 462.92 | 0.3  | 3 | '10/22 | 5121 |
| 175 | R.VLANPGNSQVAR.V                |  | 1 | 61.410 | 7.5e-005 | 613.34 | -0.7 | 2 | '9/22  | 1963 |
| 176 | K.TTTAAAVASTGPSSR.S             |  | 1 | 38.480 | 0.024    | 689.35 | 1.0  | 2 | '8/28  | 1508 |
| 177 | R.SRGGFVLFK.D                   |  | 2 | 30.080 | 0.15     | 579.33 | 0.3  | 2 | '7/18  | 6090 |
| 178 | K.STTSVSEEDVSSR.Y               |  | 1 | 59.920 | 7e-005   | 692.32 | -0.4 | 2 | '9/24  | 1438 |
| 179 | R.SRGGFVLFK.E                   |  | 2 | 30.080 | 0.15     | 579.33 | 0.3  | 2 | '7/18  | 6090 |
| 180 | R.VTDALNATR.A                   |  | 1 | 65.110 | 6.4e-005 | 480.76 | 0.3  | 2 | '6/16  | 1641 |
| 181 | K.SLDQDPVVR.A                   |  | 1 | 35.350 | 0.033    | 514.77 | 0.3  | 2 | '6/16  | 2210 |
| 182 | K.ILIEDWKK.A                    |  | 1 | 26.940 | 0.28     | 348.87 | -0.3 | 3 | '4/14  | 3960 |
| 183 | R.KSVEEYANCHLAR.A               |  | 2 | 87.200 | 2.1e-007 | 526.25 | -2.1 | 3 | '19/24 | 3263 |
| 184 | R.GWLKSNVSDAVAQSTR.<br>I        |  | 3 | 56.760 | 0.00038  | 573.63 | -0.3 | 3 | '15/30 | 4767 |
| 185 | R.FGEVDCTIK.T                   |  | 1 | 56.700 | 0.00026  | 584.29 | -0.9 | 2 | '6/18  | 3400 |
| 186 | R.FVNVPTFGKK.K                  |  | 1 | 30.140 | 0.069    | 412.58 | -0.3 | 3 | '8/20  | 4355 |
| 187 | R.RVPFLLR.G                     |  | 1 | 22.620 | 0.34     | 494.31 | -0.3 | 2 | '5/14  | 5409 |
| 188 | R.KATGPPVSELITK.A               |  | 1 | 58.510 | 0.00012  | 447.60 | 0.6  | 3 | '10/24 | 4029 |
| 189 | K.QQSELQSQR.Y                   |  | 1 | 48.430 | 0.0022   | 601.81 | 3.3  | 2 | '9/18  | 1590 |
| 190 | K.KHLEINPDHPIVETLR.Q            |  | 1 | 21.840 | 0.61     | 478.52 | -0.9 | 4 | '8/30  | 5290 |
| 191 | K.AVTEQGAELSNEER.N              |  | 1 | 80.160 | 9.7e-007 | 766.86 | -1.4 | 2 | '9/26  | 1921 |
| 192 | R.CVLQIDNAK.L                   |  | 1 | 37.400 | 0.04     | 530.78 | -0.1 | 2 | '10/16 | 2744 |
| 193 | K.ALLQSSASR.K                   |  | 1 | 34.550 | 0.06     | 466.76 | -1.1 | 2 | '8/16  | 1885 |
| 194 | R.APSIHGGSGRGVSVS<br>SAR.F      |  | 1 | 23.860 | 0.63     | 435.48 | 0.5  | 4 | '14/36 | 2994 |
| 195 | R.AIGSASEGAQSSLQEVY<br>HK.S     |  | 1 | 32.470 | 0.07     | 654.66 | -1.3 | 3 | '14/36 | 3246 |
| 196 | K.ASGPPVSELITK.A                |  | 1 | 20.290 | 1.2      | 599.83 | -8.3 | 2 | '8/22  | 3597 |
| 197 | K.AIASSLKSWNETLTSR.L            |  | 1 | 40.750 | 0.013    | 588.65 | 0.0  | 3 | '17/30 | 4862 |

|     |                         |  |    |        |          |        |      |   |        |      |
|-----|-------------------------|--|----|--------|----------|--------|------|---|--------|------|
| 198 | R.QLSLARPQAPALHLR.L     |  | 2  | 19.450 | 0.51     | 418.50 | -0.3 | 4 | '13/28 | 4926 |
| 199 | R.VVANSKESYELR.Y        |  | 1  | 31.500 | 0.099    | 465.58 | -0.1 | 3 | '9/22  | 2396 |
| 200 | K.SEDDSAVPLAK.A         |  | 1  | 56.890 | 0.0002   | 566.28 | -4.2 | 2 | '14/20 | 2049 |
| 201 | K.SVEAAAELSAKDLK.E      |  | 1  | 40.690 | 0.015    | 477.93 | 0.0  | 3 | '13/26 | 3266 |
| 202 | K.ALEENNNFSK.M          |  | 1  | 39.390 | 0.012    | 583.28 | 0.9  | 2 | '5/18  | 1610 |
| 203 | K.ATDAEADVASLNRR.I      |  | 5  | 42.300 | 0.0086   | 496.92 | -0.3 | 3 | '8/26  | 2500 |
| 204 | R.YYKNIGLGFKTPK.E       |  | 1  | 35.150 | 0.042    | 382.97 | 0.1  | 4 | '15/24 | 4788 |
| 205 | R.LAVYIDKVR.S           |  | 1  | 24.700 | 0.16     | 359.55 | -0.2 | 3 | '9/16  | 3509 |
| 206 | K.YLGEEYVK.A            |  | 2  | 32.790 | 0.049    | 500.75 | -0.1 | 2 | '11/14 | 3283 |
| 207 | K.EEEEGISQESSEEEQ.-     |  | 1  | 89.850 | 4.9e-009 | 869.84 | -0.2 | 2 | '12/28 | 1792 |
| 208 | K.SVIPSDGPSVACVK.K      |  | 12 | 57.990 | 0.00019  | 708.36 | 0.1  | 2 | '7/26  | 3267 |
| 209 | K.KASYLDCIR.A           |  | 8  | 44.470 | 0.0045   | 563.29 | -2.5 | 2 | '6/16  | 3350 |
| 210 | K.SYKVSTSGPR.A          |  | 2  | 44.810 | 0.0045   | 541.29 | 0.4  | 2 | '9/18  | 1828 |
| 211 | R.NKSTESLQANVQR.L       |  | 1  | 58.450 | 0.00026  | 492.26 | 0.3  | 3 | '16/24 | 2176 |
| 212 | K.LCVQNSPQEAR.N         |  | 1  | 46.200 | 0.0022   | 651.31 | -4.2 | 2 | '13/20 | 1625 |
| 213 | K.AQYEEVAR.R            |  | 1  | 25.690 | 0.3      | 483.24 | -1.1 | 2 | '6/14  | 2118 |
| 214 | R.EGGDGEEQDVGDAGR.L     |  | 1  | 91.370 | 5.3e-009 | 745.80 | 1.2  | 2 | '11/28 | 1232 |
| 215 | R.QIDNPDYK.G            |  | 1  | 20.620 | 0.95     | 496.74 | 1.9  | 2 | '4/14  | 1373 |
| 216 | R.EIQTAVR.L             |  | 3  | 23.010 | 1.2      | 408.73 | -0.6 | 2 | '5/12  | 1285 |
| 217 | K.EAEEGEDDRDSANGED DS.- |  | 1  | 56.580 | 2.2e-006 | 970.35 | -0.9 | 2 | '12/34 | 978  |
| 218 | K.AVPKEDIYSGGGGGGS R.S  |  | 1  | 25.350 | 0.61     | 536.26 | -0.9 | 3 | '11/32 | 2434 |
| 220 | R.AELDEVNKSAC.K         |  | 1  | 28.820 | 0.23     | 401.88 | 0.2  | 3 | '8/20  | 1650 |
| 221 | R.VAEVAPEER.E           |  | 1  | 45.820 | 0.0024   | 500.26 | 0.1  | 2 | '5/16  | 1360 |
| 222 | R.ELEQLGR.Q             |  | 1  | 26.720 | 0.61     | 422.73 | 0.7  | 2 | '5/12  | 1624 |
| 223 | K.AQQATPGGAAPTIFSR.I    |  | 1  | 24.080 | 0.86     | 786.91 | 0.6  | 2 | '17/30 | 3526 |
| 224 | R.SVLISLK.Q             |  | 1  | 26.690 | 0.094    | 380.25 | -0.7 | 2 | '4/12  | 3677 |
| 225 | R.ELDESLQVAER.L         |  | 1  | 56.480 | 0.00028  | 644.82 | -1.4 | 2 | '7/20  | 3068 |
| 226 | R.GCITIIGGGDTATCCAK.W   |  | 1  | 85.000 | 6.8e-007 | 877.90 | 1.4  | 2 | '12/32 | 3309 |
| 227 | K.EVNVSPCPTQCQLSK.G     |  | 1  | 58.660 | 0.00016  | 922.44 | -0.2 | 2 | '15/30 | 2702 |
| 228 | R.AGGPATPLSPTR.L        |  | 1  | 37.700 | 0.021    | 562.81 | 0.2  | 2 | '7/22  | 2261 |
| 229 | K.AVTKDEDEWK.E          |  | 1  | 23.990 | 0.43     | 407.53 | 0.4  | 3 | '7/18  | 2026 |
| 230 | R.IGDTWSK.K             |  | 1  | 22.020 | 1.1      | 403.71 | 0.1  | 2 | '6/12  | 1992 |
| 231 | K.DYELLCLDGTR.K         |  | 2  | 56.250 | 0.00023  | 677.82 | -0.5 | 2 | '14/20 | 4981 |
| 232 | R.SSQSSSQFSGIGR.S       |  | 2  | 78.550 | 1.3e-006 | 728.34 | -0.5 | 2 | '10/26 | 2188 |
| 233 | R.ELAEDDSILK.-          |  | 1  | 36.220 | 0.039    | 566.79 | 0.1  | 2 | '7/18  | 3288 |
| 234 | K.VLEDSLKK.S            |  | 1  | 29.730 | 0.21     | 349.53 | 0.2  | 3 | '7/16  | 2023 |

|     |                       |  |    |        |          |        |       |   |        |      |
|-----|-----------------------|--|----|--------|----------|--------|-------|---|--------|------|
| 235 | K.SQVVAGTNYFIK.V      |  | 1  | 60.310 | 0.00012  | 663.86 | -0.5  | 2 | '9/22  | 3826 |
| 236 | K.ASYLDCIR.A          |  | 12 | 40.660 | 0.0082   | 499.24 | 1.2   | 2 | '7/14  | 3399 |
| 237 | R.ISGLIYEETR.G        |  | 1  | 61.790 | 9.9e-005 | 590.81 | 0.9   | 2 | '8/18  | 3663 |
| 238 | R.RCLYASVLTAQPR.L     |  | 1  | 25.250 | 0.46     | 512.28 | 1.4   | 3 | '6/24  | 4464 |
| 239 | R.ILTPEVR.L           |  | 2  | 21.540 | 0.47     | 414.25 | 0.5   | 2 | '5/12  | 2657 |
| 240 | R.GLVGEIIKR.F         |  | 2  | 43.480 | 0.0028   | 492.81 | -1.0  | 2 | '7/16  | 4617 |
| 241 | R.ASFPGPSELHSEDSR.F   |  | 1  | 20.140 | 0.57     | 539.25 | -0.3  | 3 | '6/28  | 3207 |
| 242 | R.EILSVDGCSTNNPSQAK.L |  | 1  | 84.840 | 3.2e-007 | 881.92 | -1.1  | 2 | '12/30 | 2722 |
| 243 | K.TSDIFGSPVTATSR.L    |  | 1  | 65.890 | 3.8e-005 | 719.86 | -3.3  | 2 | '10/26 | 3701 |
| 244 | R.LQLELSKVR.E         |  | 1  | 32.890 | 0.035    | 362.56 | 0.7   | 3 | '7/16  | 3738 |
| 245 | R.TTWASSSSPNDR.T      |  | 1  | 32.520 | 0.039    | 654.80 | 1.3   | 2 | '7/22  | 1655 |
| 246 | R.GTPAGTTPGASQAPK.A   |  | 1  | 25.700 | 0.62     | 670.84 | 1.3   | 2 | '9/28  | 1299 |
| 247 | K.IIIENKPK.K          |  | 1  | 34.770 | 0.014    | 477.80 | -11.7 | 2 | '5/14  | 3949 |
| 248 | R.LGEYEDVSR.V         |  | 1  | 70.890 | 6.8e-006 | 534.25 | -0.7  | 2 | '7/16  | 2100 |
| 249 | M.PQYQTWEEFSR.A       |  | 1  | 67.940 | 9.9e-006 | 735.83 | -3.6  | 2 | '8/20  | 4221 |
| 250 | K.SIEVIENR.M          |  | 1  | 32.490 | 0.11     | 480.26 | -0.2  | 2 | '10/14 | 2377 |
| 251 | K.ALAPEYAK.A          |  | 2  | 22.860 | 1        | 431.74 | -0.7  | 2 | '10/14 | 1879 |
| 252 | K.SEDCFILDHGKDGK.I    |  | 4  | 38.870 | 0.0093   | 540.92 | 0.1   | 3 | '14/26 | 3356 |
| 253 | K.SELSACFSR.L         |  | 1  | 43.800 | 0.0023   | 528.74 | -2.1  | 2 | '7/16  | 2857 |
| 254 | R.YEDLLTR.L           |  | 1  | 41.360 | 0.008    | 455.24 | 0.2   | 2 | '6/12  | 3107 |
| 255 | R.EADDIVNWLK.K        |  | 1  | 37.490 | 0.024    | 601.80 | -2.2  | 2 | '7/18  | 5397 |
| 256 | K.AGKEPGLQIWR.V       |  | 2  | 32.980 | 0.05     | 418.90 | 0.5   | 3 | '9/20  | 4726 |
| 257 | K.VIVVGNPANTNCLTASK.S |  | 1  | 83.140 | 7.6e-007 | 879.46 | -0.8  | 2 | '12/32 | 3417 |
| 258 | K.DVNQQEFVR.A         |  | 1  | 39.110 | 0.019    | 567.78 | 0.4   | 2 | '6/16  | 2422 |
| 259 | K.VAGQDGSVVQFK.I      |  | 1  | 66.770 | 3.8e-005 | 617.83 | 0.6   | 2 | '10/22 | 2810 |
| 260 | K.EIAEAYLGK.T         |  | 1  | 21.450 | 1.2      | 497.27 | -0.8  | 2 | '4/16  | 3066 |
| 261 | R.KESYSVYVYKVLK.Q     |  | 4  | 44.340 | 0.004    | 535.97 | -0.4  | 3 | '8/24  | 4987 |
| 262 | R.DDGYSTKDSYSSR.D     |  | 1  | 28.230 | 0.22     | 494.21 | 0.7   | 3 | '14/24 | 1383 |
| 263 | R.VLVDQTTGLSR.G       |  | 1  | 75.100 | 4.9e-006 | 594.83 | -0.4  | 2 | '7/20  | 2751 |
| 264 | K.QEYDESGPSIVHRK.C    |  | 4  | 19.560 | 1.3      | 411.95 | -3.0  | 4 | '15/26 | 2969 |
| 265 | R.FEEELAAR.E          |  | 1  | 35.380 | 0.04     | 482.74 | 0.2   | 2 | '7/14  | 2381 |
| 266 | R.EIAQDFKTDLR.F       |  | 2  | 53.620 | 0.00067  | 668.35 | -0.7  | 2 | '9/20  | 3574 |
| 267 | R.DFVNYLVR.I          |  | 1  | 42.280 | 0.0086   | 513.27 | -1.5  | 2 | '6/14  | 5027 |
| 268 | R.NFRNPLAK.-          |  | 2  | 22.420 | 1.1      | 480.27 | -1.5  | 2 | '7/14  | 3511 |
| 269 | M.VVEHPEFLK.A         |  | 1  | 20.920 | 0.81     | 366.54 | 0.4   | 3 | '11/16 | 3650 |
| 270 | R.EPGLCTWQSLR.S       |  | 1  | 45.340 | 0.0037   | 673.83 | 0.7   | 2 | '8/20  | 4421 |
| 271 | K.GFGYKGCSCFHR.I      |  | 1  | 43.330 | 0.0027   | 439.20 | -1.1  | 3 | '11/20 | 4090 |
| 272 | R.FYQDLKDR.D          |  | 1  | 23.580 | 0.41     | 362.19 | -0.8  | 3 | '6/14  | 2691 |
| 273 | R.VNGSLAVSR.A         |  | 2  | 40.510 | 0.02     | 451.76 | 1.1   | 2 | '7/16  | 1613 |

|     |                               |                |    |        |          |        |      |   |        |      |
|-----|-------------------------------|----------------|----|--------|----------|--------|------|---|--------|------|
| 274 | K.IIVLGLLPR.G                 |                | 1  | 44.360 | 5.1e-005 | 497.34 | -2.0 | 2 | '6/16  | 5744 |
| 275 | R.LQEKEDLQELNDR.L             |                | 1  | 44.220 | 0.019    | 543.94 | 0.0  | 3 | '15/24 | 2861 |
| 276 | K.GGSLPKVEAK.F                |                | 1  | 26.300 | 0.29     | 329.19 | 0.5  | 3 | '12/18 | 2044 |
| 277 | K.VNQIGSVTESIQACK.L           |                | 1  | 97.250 | 3.1e-008 | 817.41 | 0.2  | 2 | '12/28 | 3524 |
| 278 | R.AQVIYTR.N                   |                | 1  | 37.370 | 0.02     | 425.74 | 0.2  | 2 | '6/12  | 1726 |
| 279 | K.VDSLLENLEK.I                |                | 3  | 48.720 | 0.0026   | 580.31 | 0.8  | 2 | '13/18 | 4556 |
| 280 | K.DAEAWFTSR.T                 |                | 1  | 44.560 | 0.0027   | 541.75 | -0.3 | 2 | '7/16  | 4331 |
| 281 | K.IIAPPERK.Y                  |                | 6  | 27.690 | 0.066    | 308.53 | 0.2  | 3 | '5/14  | 2001 |
| 282 | K.GQEGSVCLR.S                 |                | 1  | 32.880 | 0.054    | 503.24 | -0.2 | 2 | '7/16  | 1706 |
| 283 | R.AREQAEAEVASLNR.I            |                | 2  | 25.500 | 0.44     | 425.73 | 0.0  | 4 | '8/28  | 3110 |
| 284 | R.EIQTAVRLLLLPGELAK.H         |                | 3  | 35.080 | 0.007    | 584.35 | -0.9 | 3 | '11/30 | 5725 |
| 285 | K.IRIFDLGR.K                  |                | 2  | 31.680 | 0.056    | 330.53 | 0.0  | 3 | '6/14  | 5227 |
| 286 | K.ELSDIAHR.I                  |                | 1  | 28.770 | 0.13     | 314.17 | 0.7  | 3 | '5/14  | 2054 |
| 287 | R.FDEFFSEGCAPGSKKDS<br>SLCK.L |                | 2  | 19.370 | 0.45     | 599.77 | -0.1 | 4 | '15/40 | 4961 |
| 288 | R.QGTMPVSLLK.A                | 0.0001000000.0 | 4  | 24.360 | 0.59     | 545.31 | 7.0  | 2 | '8/18  | 3553 |
| 289 | R.NLLSVAYKNVVGARR.S           |                | 6  | 25.740 | 0.12     | 553.99 | 0.6  | 3 | '11/28 | 5661 |
| 290 | R.LAKYNQLLR.I                 |                | 1  | 24.810 | 0.19     | 373.56 | -0.4 | 3 | '6/16  | 4009 |
| 291 | M.PYQYPALTPEQK.K              |                | 1  | 37.130 | 0.031    | 717.87 | -1.2 | 2 | '7/22  | 3321 |
| 292 | R.SHEGETAYIR.V                |                | 2  | 30.570 | 0.1      | 581.78 | 6.5  | 2 | '7/18  | 2305 |
| 293 | R.NTDVAQSPEAPK.Q              |                | 1  | 57.070 | 0.0002   | 628.81 | 0.5  | 2 | '14/22 | 1308 |
| 294 | K.ITSEIPQTER.M                |                | 1  | 37.160 | 0.053    | 587.31 | 0.0  | 2 | '12/18 | 1989 |
| 295 | R.IQLVEEELDRAQER.L            |                | 15 | 33.940 | 0.061    | 576.64 | -0.3 | 3 | '8/26  | 4209 |
| 296 | K.YEELQSLAGK.H                |                | 1  | 62.530 | 9.2e-005 | 569.29 | -3.6 | 2 | '15/18 | 3091 |
| 297 | R.EESEESEAEVQR.T              |                | 2  | 60.880 | 2.2e-005 | 759.83 | -1.0 | 2 | '9/24  | 1284 |
| 298 | K.EVSSATNALR.S                |                | 1  | 57.990 | 0.00039  | 524.28 | 0.9  | 2 | '8/18  | 1719 |
| 299 | K.AALKTASDFITK.M              |                | 2  | 72.300 | 5.8e-006 | 422.57 | -0.1 | 3 | '9/22  | 3902 |
| 300 | K.TATPQQAQEVHEK.L             |                | 6  | 75.060 | 4.8e-006 | 733.87 | 0.6  | 2 | '10/24 | 1434 |
| 301 | K.CCLTYCFNKPEDK.-             |                | 1  | 30.790 | 0.015    | 578.91 | -1.0 | 3 | '10/24 | 3386 |
| 302 | R.VYSTSVTGSR.E                |                | 1  | 45.380 | 0.0031   | 528.77 | -1.0 | 2 | '9/18  | 1463 |
| 303 | K.FVEGLPINDFSR.E              |                | 1  | 40.930 | 0.013    | 697.36 | -0.1 | 2 | '16/22 | 5014 |
| 304 | R.TGYTLDVTTGQR.K              |                | 2  | 74.280 | 5.2e-006 | 656.33 | -1.0 | 2 | '10/22 | 3021 |
| 305 | M.VNFTVDQIR.A                 |                | 1  | 42.170 | 0.0096   | 546.30 | -1.4 | 2 | '7/16  | 3630 |
| 306 | K.IITGGAAAQDGR.L              |                | 1  | 72.410 | 8.5e-006 | 565.30 | -0.6 | 2 | '9/22  | 1618 |
| 307 | K.IETRDGKLVSESSDVLPK<br>.-    |                | 1  | 34.560 | 0.039    | 494.02 | 0.6  | 4 | '10/34 | 4129 |
| 308 | K.QVENAGAIGPSR.F              |                | 1  | 36.280 | 0.025    | 599.81 | -1.4 | 2 | '7/22  | 1742 |
| 309 | K.SASDLTWDNLK.G               |                | 4  | 63.680 | 6.2e-005 | 625.31 | -0.2 | 2 | '8/20  | 4010 |
| 310 | R.VLQDQLK.T                   |                | 1  | 37.310 | 0.03     | 422.25 | 0.5  | 2 | '6/12  | 1937 |
| 311 | K.KALAAGGYDVEKNNSR.I          |                | 2  | 60.200 | 0.00015  | 564.96 | 0.8  | 3 | '13/30 | 2863 |



|     |                                 |                                 |   |        |          |        |      |   |        |      |
|-----|---------------------------------|---------------------------------|---|--------|----------|--------|------|---|--------|------|
| 312 | K.SEHPGLSIGDTAKK.L              |                                 | 1 | 35.120 | 0.041    | 360.69 | 0.6  | 4 | '14/26 | 2938 |
| 313 | K.LCYVALDFENEMATAAS<br>SSSLEK.S | 0.00000000000100000000<br>000.0 | 3 | 97.150 | 1.2e-008 | 851.39 | 0.2  | 3 | '22/44 | 5097 |
| 314 | R.SLFSSIGEVEESAK.L              |                                 | 1 | 58.010 | 0.00021  | 677.35 | -0.4 | 2 | '10/24 | 4888 |
| 315 | K.YLYEIAR.R                     |                                 | 2 | 34.480 | 0.041    | 464.25 | -0.1 | 2 | '6/12  | 3474 |
| 316 | R.ALLGYADNQCK.L                 |                                 | 1 | 47.070 | 0.0018   | 626.80 | -2.8 | 2 | '14/20 | 3050 |
| 317 | K.VGGTSDVEVNEKK.D               |                                 | 1 | 40.000 | 0.017    | 454.57 | -0.8 | 3 | '14/24 | 1423 |
| 318 | K.AGFAGDDAPR.A                  |                                 | 5 | 70.860 | 5.2e-006 | 488.73 | -0.1 | 2 | '9/18  | 1825 |
| 319 | K.EQISDIDDAVR.K                 |                                 | 1 | 53.340 | 0.00048  | 630.81 | 0.8  | 2 | '8/20  | 3076 |
| 320 | R.DYFEQYGK.I                    |                                 | 1 | 31.650 | 0.032    | 525.23 | -0.7 | 2 | '6/14  | 3228 |
| 321 | K.EGDLIAAQR.L                   |                                 | 1 | 43.670 | 0.0057   | 522.28 | -0.3 | 2 | '7/18  | 2360 |
| 322 | -.KVYTSQEDLVEKK.C               |                                 | 1 | 49.800 | 0.0013   | 556.63 | 1.2  | 3 | '11/26 | 2648 |
| 323 | K.ALTSELANAR.D                  |                                 | 1 | 64.260 | 7.1e-005 | 523.29 | -0.1 | 2 | '9/18  | 2664 |
| 324 | K.GITLSVRP.-                    |                                 | 2 | 34.780 | 0.029    | 421.76 | 0.0  | 2 | '4/14  | 2706 |
| 325 | R.WYFDVTEGK.C                   |                                 | 1 | 32.980 | 0.032    | 572.77 | -0.3 | 2 | '8/16  | 4814 |
| 326 | R.ARLQLELSKVR.E                 |                                 | 1 | 26.530 | 0.09     | 328.96 | 0.3  | 4 | '8/20  | 4469 |
| 327 | K.TEESPASDEAGEKEAK.<br>S        |                                 | 2 | 69.950 | 4.1e-006 | 839.38 | -0.4 | 2 | '11/30 | 1167 |
| 328 | K.AGGAAVVITEPEHTK.E             |                                 | 1 | 35.890 | 0.043    | 493.93 | -3.0 | 3 | '12/28 | 2684 |
| 329 | R.GGIVDEGALLR.A                 |                                 | 1 | 60.660 | 0.00012  | 550.31 | 1.4  | 2 | '9/20  | 4121 |
| 330 | K.EDPQTFYYAVAVVKK.D             |                                 | 6 | 58.300 | 0.00022  | 879.46 | 0.0  | 2 | '11/28 | 4707 |
| 331 | R.VDCGYPHVTPK.E                 |                                 | 1 | 27.120 | 0.18     | 424.87 | 1.9  | 3 | '9/20  | 2466 |
| 332 | K.TPKGPSSVEDIKAK.M              |                                 | 2 | 50.590 | 0.0036   | 486.27 | -1.1 | 3 | '10/26 | 2746 |
| 333 | K.SLLGKDVFLK.D                  |                                 | 2 | 34.460 | 0.011    | 616.88 | -1.8 | 2 | '16/20 | 5742 |
| 334 | K.CAGNEDIITLR.A                 |                                 | 1 | 62.960 | 6e-005   | 631.31 | -1.9 | 2 | '8/20  | 3579 |
| 335 | R.EDLPVNTSK.T                   |                                 | 1 | 53.150 | 0.00072  | 501.76 | 0.4  | 2 | '6/16  | 1737 |
| 336 | K.GFSVVADTPELQR.I               |                                 | 1 | 52.800 | 0.00088  | 709.87 | -2.0 | 2 | '16/24 | 4053 |
| 337 | R.TIAQDYGVLK.A                  |                                 | 1 | 30.010 | 0.21     | 554.31 | 0.0  | 2 | '8/18  | 3537 |
| 338 | R.DSYESYGNSR.S                  |                                 | 1 | 50.270 | 8.2e-005 | 589.24 | -1.4 | 2 | '8/18  | 1510 |
| 339 | R.KPVEEYANCHLAR.A               |                                 | 1 | 33.820 | 0.054    | 397.45 | 0.4  | 4 | '11/24 | 3265 |
| 340 | R.RLNDFASTVR.I                  |                                 | 1 | 41.230 | 0.011    | 589.82 | -0.1 | 2 | '13/18 | 3656 |
| 341 | R.TDGKVFQFLNAK.C                |                                 | 1 | 32.350 | 0.084    | 456.58 | -1.0 | 3 | '12/22 | 5090 |
| 342 | K.CGNVNFAR.R                    |                                 | 1 | 36.200 | 0.022    | 469.22 | 1.9  | 2 | '7/14  | 1941 |
| 343 | K.TIAPQNAPR.D                   |                                 | 2 | 33.950 | 0.044    | 484.27 | -0.2 | 2 | '8/16  | 1344 |
| 344 | K.VCNPIITK.L                    |                                 | 2 | 22.630 | 1.2      | 472.77 | -0.4 | 2 | '5/14  | 2344 |
| 345 | K.ESAFEFLSSA.-                  |                                 | 1 | 31.860 | 0.046    | 544.25 | -2.5 | 2 | '5/18  | 5949 |
| 346 | R.KCSTSSLLEACTFR.R              |                                 | 2 | 35.670 | 0.025    | 553.93 | -0.2 | 3 | '7/26  | 4034 |
| 347 | R.YLAEVATGDDKKR.I               |                                 | 1 | 23.300 | 0.7      | 367.20 | 0.3  | 4 | '15/24 | 3071 |
| 348 | K.DTSSSTVSTQR.S                 |                                 | 1 | 57.010 | 0.00021  | 634.31 | 0.9  | 2 | '9/22  | 1223 |
| 349 | K.IQVYSR.H                      |                                 | 1 | 30.210 | 0.12     | 383.22 | -0.4 | 2 | '5/10  | 1627 |

|     |                       |                |   |        |          |        |      |   |        |      |
|-----|-----------------------|----------------|---|--------|----------|--------|------|---|--------|------|
| 350 | R.SLETENAGLR.L        |                | 1 | 47.540 | 0.0029   | 545.28 | -0.5 | 2 | '7/18  | 2141 |
| 351 | R.SETKDLLFR.D         |                | 4 | 33.450 | 0.062    | 554.80 | 0.2  | 2 | '7/16  | 3727 |
| 352 | R.ISQTYQQQYGR.S       |                | 1 | 56.140 | 0.00023  | 686.34 | -1.8 | 2 | '8/20  | 1788 |
| 353 | K.VLIDIR.E            |                | 1 | 24.510 | 0.4      | 364.74 | 0.5  | 2 | '5/10  | 3617 |
| 354 | R.IAQLICER.I          |                | 1 | 54.380 | 0.00087  | 501.77 | -0.3 | 2 | '7/14  | 2922 |
| 355 | K.AQNTWGCNLSR.T       |                | 1 | 63.150 | 3e-005   | 682.31 | 0.1  | 2 | '9/22  | 2645 |
| 356 | R.IEEEELGSK.A         |                | 1 | 29.330 | 0.2      | 452.73 | -0.6 | 2 | '6/14  | 1442 |
| 357 | K.TESTLKTTQFSCTLGEK.F |                | 1 | 40.300 | 0.035    | 644.32 | 0.3  | 3 | '17/32 | 3292 |
| 358 | R.IGVITNR.E           |                | 1 | 37.130 | 0.043    | 386.74 | 0.0  | 2 | '4/12  | 2090 |
| 359 | R.KQNDVFGAEQ.-        |                | 1 | 36.090 | 0.018    | 632.79 | 0.6  | 2 | '6/20  | 2628 |
| 360 | K.AEGLGDGYR.L         |                | 1 | 35.460 | 0.026    | 469.22 | -5.0 | 2 | '7/16  | 1941 |
| 361 | K.LKGDDLQAIKK.E       |                | 4 | 45.800 | 0.0022   | 410.25 | -0.2 | 3 | '8/20  | 2871 |
| 362 | K.IQVLQQQADDAEER.A    |                | 4 | 83.810 | 5.9e-007 | 821.90 | -0.4 | 2 | '9/26  | 2772 |
| 363 | R.DLEGAVSR.L          |                | 1 | 42.850 | 0.016    | 423.72 | -0.2 | 2 | '6/14  | 1915 |
| 364 | K.TTQFSCTLGEK.F       |                | 1 | 55.050 | 0.00025  | 636.30 | 4.1  | 2 | '9/20  | 2559 |
| 365 | R.AAPEASGTPSSDAVSR.L  |                | 1 | 40.140 | 0.0083   | 751.86 | 1.5  | 2 | '9/30  | 1447 |
| 366 | K.ISKGANPVEIR.R       |                | 2 | 31.290 | 0.057    | 395.23 | -2.0 | 3 | '11/20 | 2677 |
| 367 | R.SGAQASSTPLSPTRITR.L |                | 1 | 38.550 | 0.019    | 577.31 | 3.5  | 3 | '9/32  | 2946 |
| 368 | R.GLFIIDGKGVLR.Q      |                | 1 | 36.010 | 0.012    | 644.39 | -0.6 | 2 | '12/22 | 5739 |
| 369 | K.EVVEEAENGR.D        |                | 2 | 48.820 | 0.00084  | 566.27 | -1.0 | 2 | '9/18  | 1398 |
| 370 | R.FANYIDKVR.F         |                | 1 | 28.290 | 0.18     | 375.87 | 0.4  | 3 | '10/16 | 3829 |
| 371 | K.ALELTGLKVFNEIK.L    |                | 1 | 32.300 | 0.036    | 544.65 | -0.6 | 3 | '10/28 | 5698 |
| 372 | R.EEECILACR.G         |                | 1 | 37.340 | 0.014    | 590.26 | -1.5 | 2 | '6/16  | 2699 |
| 373 | K.DSGFQMNQLR.G        | 0.0000010000.0 | 3 | 61.620 | 3.1e-005 | 606.28 | -0.6 | 2 | '8/18  | 2248 |
| 374 | R.YFGGTEDR.L          |                | 1 | 26.470 | 0.061    | 472.71 | 1.4  | 2 | '5/14  | 1962 |
| 375 | R.LQSEPEsirK.W        |                | 1 | 25.740 | 0.44     | 396.22 | -0.5 | 3 | '12/18 | 1817 |
| 376 | R.LQAANDSVCR.L        |                | 1 | 42.800 | 0.0052   | 567.27 | -0.4 | 2 | '5/18  | 1303 |
| 377 | K.LLATEQEDA AVAK.S    |                | 1 | 67.520 | 3.1e-005 | 679.86 | 0.7  | 2 | '10/24 | 2476 |
| 378 | R.YNAQCQETIR.V        |                | 1 | 50.720 | 0.0006   | 641.80 | 0.3  | 2 | '6/18  | 1639 |
| 379 | K.AGNLGGGVVTIER.S     |                | 1 | 58.870 | 0.00018  | 621.84 | -0.9 | 2 | '10/24 | 3251 |
| 380 | R.VAVEEVDEEGKFVR.L    |                | 1 | 24.090 | 0.58     | 535.94 | -0.4 | 3 | '9/26  | 3297 |
| 381 | K.TVSPALISR.F         |                | 2 | 29.260 | 0.19     | 472.28 | 4.8  | 2 | '7/16  | 2711 |
| 382 | K.AQYEDIANRSR.A       |                | 1 | 20.470 | 1.7      | 441.55 | 0.2  | 3 | '4/20  | 2174 |
| 383 | -.EDFDEFER.Q          |                | 1 | 47.030 | 0.00017  | 543.72 | -0.6 | 2 | '7/14  | 4400 |
| 384 | -.IMKVK.A             | 0.01000.0      | 1 | 20.540 | 0.64     | 317.70 | -5.4 | 2 | '4/8   | 2552 |
| 385 | R.YIETDPANR.D         |                | 2 | 30.840 | 0.1      | 539.76 | -0.8 | 2 | '8/16  | 1652 |
| 386 | K.AGEEAFEK.L          |                | 1 | 34.960 | 0.025    | 440.71 | 1.3  | 2 | '5/14  | 1960 |

|     |                                 |                                  |    |        |          |        |       |   |        |      |
|-----|---------------------------------|----------------------------------|----|--------|----------|--------|-------|---|--------|------|
| 387 | K.HQTVPQNTGGKNPDPW<br>AK.N      |                                  | 6  | 40.270 | 0.014    | 659.00 | -0.1  | 3 | '10/34 | 3210 |
| 388 | K.YEKDIAAYR.A                   |                                  | 4  | 62.070 | 7.5e-005 | 564.79 | -0.1  | 2 | '8/16  | 2625 |
| 389 | R.QVLLGDQIPK.F                  |                                  | 1  | 42.060 | 0.0038   | 555.83 | 0.9   | 2 | '8/18  | 3635 |
| 390 | K.LLCGLAER.L                    |                                  | 1  | 64.140 | 7.4e-005 | 522.80 | -0.2  | 2 | '8/16  | 4790 |
| 391 | K.SASDLTWDNLKKG.K               |                                  | 4  | 66.580 | 3.5e-005 | 717.86 | 0.0   | 2 | '9/24  | 3531 |
| 392 | K.ALAAAGYDVEK.N                 |                                  | 2  | 54.330 | 0.00088  | 554.29 | 1.6   | 2 | '8/20  | 2509 |
| 393 | R.ILENEKDLLEEAEYKEAR<br>.L      |                                  | 1  | 29.660 | 0.14     | 552.77 | -0.2  | 4 | '17/34 | 3618 |
| 394 | R.SASSGAEGDVSSREP.<br>-         |                                  | 1  | 75.530 | 9.6e-007 | 782.84 | 2.2   | 2 | '12/30 | 1506 |
| 395 | R.KESYSIYVYK.V                  |                                  | 1  | 49.510 | 0.0016   | 640.33 | -0.2  | 2 | '6/18  | 3444 |
| 396 | K.SQIFSTASDNQPTVIK.V            |                                  | 2  | 67.730 | 4.6e-005 | 918.97 | -0.3  | 2 | '8/32  | 3740 |
| 397 | K.HAVSEGTKAVTKYTSSK.<br>-       |                                  | 4  | 52.070 | 0.00089  | 598.65 | 1.7   | 3 | '18/32 | 3125 |
| 398 | K.GEELSCEER.N                   |                                  | 1  | 28.010 | 0.026    | 554.73 | 1.4   | 2 | '6/16  | 1240 |
| 399 | K.VEPAVDTSR.I                   |                                  | 1  | 24.330 | 0.48     | 487.25 | 0.4   | 2 | '4/16  | 1195 |
| 400 | K.LILPNKQK.N                    |                                  | 2  | 30.100 | 0.018    | 477.31 | -11.7 | 2 | '4/14  | 4361 |
| 401 | K.SDVEAIFSK.Y                   |                                  | 3  | 43.430 | 0.0052   | 498.25 | -2.6  | 2 | '6/16  | 3706 |
| 402 | K.SELVANNVTLPAGEQR.<br>K        |                                  | 1  | 59.950 | 0.00014  | 849.44 | -1.0  | 2 | '9/30  | 3404 |
| 403 | R.FACHSASLTVR.N                 |                                  | 1  | 34.110 | 0.056    | 416.88 | -1.0  | 3 | '8/20  | 3237 |
| 404 | K.AEEDEILNRSPR.N                |                                  | 1  | 21.870 | 0.75     | 476.91 | -2.2  | 3 | '6/22  | 2670 |
| 405 | K.DSYVGDEAQSKR.G                |                                  | 6  | 60.220 | 7.4e-005 | 677.82 | -0.1  | 2 | '9/22  | 1516 |
| 406 | K.LDNNWGR.E                     |                                  | 2  | 34.250 | 0.025    | 437.71 | -0.3  | 2 | '5/12  | 2065 |
| 407 | K.IQDKEGIPPDQQR.L               |                                  | 2  | 20.410 | 1.5      | 508.60 | -0.3  | 3 | '12/24 | 1918 |
| 408 | K.TVGMVAGDEESYEVFAD<br>LFDPIK.L | 0.00010000000000000000<br>0000.0 | 1  | 52.430 | 0.00061  | 883.09 | -1.1  | 3 | '20/46 | 6641 |
| 409 | R.DNIQGITKPAIR.R                |                                  | 1  | 22.440 | 0.49     | 442.59 | 2.0   | 3 | '8/22  | 2913 |
| 410 | R.CTDDFNGAQCK.A                 |                                  | 1  | 69.320 | 6.3e-007 | 658.26 | 0.0   | 2 | '9/20  | 1384 |
| 411 | K.KSCHTGLGR.S                   |                                  | 2  | 35.090 | 0.03     | 339.17 | -0.6  | 3 | '7/16  | 1710 |
| 412 | K.KSASDLTWDNLK.G                |                                  | 4  | 68.310 | 2.4e-005 | 689.36 | 2.1   | 2 | '8/22  | 3717 |
| 413 | R.NGLSLAALKK.A                  |                                  | 2  | 52.640 | 0.00041  | 507.82 | 0.8   | 2 | '8/18  | 3664 |
| 414 | K.KVPQVSTPTLVEVSR.N             |                                  | 12 | 76.710 | 1.3e-006 | 820.47 | 1.0   | 2 | '9/28  | 3848 |
| 415 | K.HAVSEGTKAVTKYTSSK.<br>C       |                                  | 2  | 52.070 | 0.00089  | 598.65 | 1.7   | 3 | '18/32 | 3125 |
| 416 | R.HGLVPFAFVR.F                  |                                  | 1  | 22.630 | 0.86     | 571.83 | -1.7  | 2 | '4/18  | 5944 |
| 417 | K.SGDEGSEDEAPSGED.-             |                                  | 1  | 73.130 | 4.9e-008 | 740.76 | 0.9   | 2 | '12/28 | 1118 |
| 418 | K.VGGTSDVEVNEKKDR.V             |                                  | 1  | 42.530 | 0.01     | 408.96 | -0.2  | 4 | '8/28  | 1886 |
| 419 | M.NTGLTR.L                      |                                  | 1  | 22.470 | 1        | 331.19 | 5.6   | 2 | '4/10  | 3735 |
| 420 | K.IGDTSVSYK.Y                   |                                  | 1  | 53.230 | 0.00048  | 485.25 | -0.2  | 2 | '6/16  | 1754 |

|     |                             |                         |   |             |          |        |       |   |        |      |
|-----|-----------------------------|-------------------------|---|-------------|----------|--------|-------|---|--------|------|
| 421 | M.PEFLEDPSVLTK.D            |                         | 1 | 73.240      | 8.9e-006 | 687.86 | -2.0  | 2 | '10/22 | 4680 |
| 422 | K.VLAAYK.A                  |                         | 3 | 40.470      | 0.0057   | 382.24 | 0.3   | 2 | '6/12  | 2482 |
| 423 | R.EEFKELK.A                 |                         | 1 | 25.860      | 0.36     | 308.17 | -0.2  | 3 | '6/12  | 2477 |
| 424 | K.IFVGGLSPDTPEEKIR.E        |                         | 1 | 27.680      | 0.25     | 586.65 | -1.3  | 3 | '7/30  | 4529 |
| 425 | K.SIDDLLEEK.V               |                         | 5 | 46.230      | 0.0043   | 474.73 | -0.1  | 2 | '6/14  | 2097 |
| 426 | K.VAAYDKLEK.T               |                         | 1 | 35.100      | 0.036    | 346.19 | -0.1  | 3 | '11/16 | 2317 |
| 427 | R.LFDQAFGLPR.L              |                         | 1 | 67.160      | 3.2e-005 | 582.31 | -0.4  | 2 | '8/18  | 5224 |
| 428 | R.AILSTYRK.R                |                         | 1 | 19.540      | 0.71     | 317.86 | -0.3  | 3 | '6/14  | 2926 |
| 429 | K.IISNASCTTNCLAPLAK.V       |                         | 2 | 126.47<br>0 | 3.5e-011 | 917.46 | -0.4  | 2 | '12/32 | 3556 |
| 430 | R.QCLPCGPGGK.G              |                         | 1 | 31.520      | 0.034    | 537.25 | 0.4   | 2 | '8/18  | 1901 |
| 431 | -.SDVLELTDNFSR.I            |                         | 1 | 82.460      | 3.6e-007 | 820.38 | -0.5  | 2 | '10/26 | 4628 |
| 432 | K.VSASTVPTDGSSR.N           |                         | 1 | 26.190      | 0.3      | 632.31 | -0.2  | 2 | '9/24  | 1353 |
| 433 | R.TEELNREVAGHTEQLQM<br>SR.S | 0.0000000000000000100.0 | 1 | 29.870      | 0.1      | 561.77 | 2.2   | 4 | '15/36 | 3213 |
| 434 | R.AKLQIELGK.C               |                         | 1 | 36.380      | 0.021    | 333.88 | 0.8   | 3 | '6/16  | 3367 |
| 435 | R.NEQDAYAINSYTR.S           |                         | 1 | 93.730      | 2.6e-008 | 772.85 | -0.3  | 2 | '19/24 | 2968 |
| 436 | K.EQFLDGDGWTSR.W            |                         | 1 | 47.370      | 0.0021   | 705.82 | 1.3   | 2 | '8/22  | 4266 |
| 437 | K.FLNVLSPR.G                |                         | 1 | 34.820      | 0.049    | 473.28 | 1.0   | 2 | '6/14  | 4618 |
| 438 | R.SDKSPDLAPTPAPQSTP<br>R.N  |                         | 1 | 41.240      | 0.012    | 622.32 | 1.2   | 3 | '16/34 | 2370 |
| 439 | R.CLGAEGASCGR.A             |                         | 1 | 35.850      | 0.0057   | 597.75 | -1.3  | 2 | '7/22  | 1545 |
| 440 | R.FVNVPTFGK.K               |                         | 1 | 26.370      | 0.28     | 554.31 | -0.9  | 2 | '4/18  | 4518 |
| 441 | K.LIEVDDER.K                |                         | 1 | 35.560      | 0.034    | 494.75 | 1.4   | 2 | '6/14  | 2269 |
| 442 | K.GAVEKGEELSCEER.N          |                         | 1 | 26.440      | 0.19     | 531.58 | 0.6   | 3 | '13/26 | 2440 |
| 443 | R.LNDFASTVR.I               |                         | 1 | 45.210      | 0.004    | 511.77 | -0.4  | 2 | '8/16  | 2774 |
| 444 | R.VGDYGSLSGR.E              |                         | 1 | 65.650      | 2.8e-005 | 505.75 | -0.1  | 2 | '8/18  | 2272 |
| 445 | R.LAVYIDR.V                 |                         | 1 | 34.730      | 0.038    | 425.24 | -0.6  | 2 | '6/12  | 3041 |
| 446 | K.TYAICGAIR.R               |                         | 1 | 49.660      | 0.0013   | 512.77 | 0.9   | 2 | '8/16  | 3112 |
| 447 | R.NVDGVNYASITR.N            |                         | 1 | 58.950      | 0.00021  | 654.83 | 1.1   | 2 | '9/22  | 3138 |
| 448 | K.TASDFITK.M                |                         | 2 | 53.610      | 0.00036  | 441.73 | 0.3   | 2 | '7/14  | 2226 |
| 449 | K.NAGFTPQER.Q               |                         | 1 | 21.880      | 0.79     | 510.25 | 3.2   | 2 | '6/16  | 1708 |
| 450 | K.GDVAFVK.H                 |                         | 2 | 45.190      | 0.0041   | 368.21 | -0.4  | 2 | '6/12  | 2217 |
| 451 | R.AQCGGLLGVR.T              |                         | 1 | 28.370      | 0.22     | 544.28 | -10.8 | 2 | '8/20  | 3302 |
| 452 | R.GNDVAFHFNPR.F             |                         | 2 | 67.590      | 1.7e-005 | 637.31 | 0.4   | 2 | '12/20 | 3775 |
| 453 | K.AGVIFPVGR.M               |                         | 1 | 24.590      | 0.78     | 458.27 | -0.7  | 2 | '6/16  | 3978 |
| 454 | K.AWTVLTEYYK.S              |                         | 1 | 24.380      | 0.68     | 637.33 | 3.2   | 2 | '6/18  | 5110 |
| 455 | K.NCTYTQVQTR.S              |                         | 2 | 40.870      | 0.0054   | 635.80 | -0.6  | 2 | '12/18 | 1498 |
| 456 | R.FDEFFSEGCAPGSKK.D         |                         | 4 | 63.940      | 2.7e-005 | 853.38 | -0.2  | 2 | '11/28 | 4378 |
| 457 | K.GILAADESTGSIK.R           |                         | 1 | 74.220      | 7.4e-006 | 666.85 | 0.1   | 2 | '11/26 | 3111 |

|     |                           |  |   |             |          |        |      |   |        |      |
|-----|---------------------------|--|---|-------------|----------|--------|------|---|--------|------|
| 458 | R.IYGGSVTGATCK.E          |  | 6 | 100.91<br>0 | 1.3e-008 | 663.84 | 0.5  | 2 | '11/24 | 2635 |
| 459 | R.KTFTAWCNSHLR.K          |  | 2 | 49.060      | 0.002    | 507.59 | 0.2  | 3 | '8/22  | 4437 |
| 460 | K.AEEAQKTESVDNEGE.-       |  | 1 | 75.070      | 7.2e-007 | 818.35 | 0.1  | 2 | '20/28 | 1166 |
| 461 | K.VQESTKGPDEAKIK.A        |  | 1 | 26.620      | 0.35     | 383.21 | 1.8  | 4 | '11/26 | 2047 |
| 462 | R.YVLCTAPRA               |  | 1 | 33.670      | 0.062    | 490.25 | -1.3 | 2 | '7/14  | 2557 |
| 463 | K.IAVAAQNCYK.V            |  | 3 | 49.840      | 0.0017   | 569.29 | 1.1  | 2 | '7/18  | 1924 |
| 464 | R.ELTPQVVSAAR.I           |  | 1 | 37.820      | 0.037    | 585.83 | -0.3 | 2 | '8/20  | 2829 |
| 465 | K.ENLKAAQEEYVKR.A         |  | 2 | 48.320      | 0.0061   | 526.61 | -0.2 | 3 | '11/24 | 2906 |
| 466 | K.SLNILTAFAQK.K           |  | 1 | 50.740      | 0.00074  | 567.83 | 0.1  | 2 | '8/18  | 5396 |
| 467 | K.DLEEWNR.Q               |  | 1 | 37.690      | 0.0091   | 545.25 | 1.2  | 2 | '7/14  | 3082 |
| 468 | R.CYCGEGLSCR.I            |  | 1 | 45.910      | 6.7e-005 | 631.24 | -0.1 | 2 | '8/18  | 2167 |
| 469 | R.GDFCIQVGR.N             |  | 2 | 60.370      | 9.7e-005 | 526.25 | -1.6 | 2 | '7/16  | 3456 |
| 470 | R.SLQEQADAAEER.A          |  | 2 | 58.650      | 9.1e-005 | 673.81 | 0.0  | 2 | '9/22  | 1927 |
| 471 | K.AQASSIPVGSR.C           |  | 1 | 31.490      | 0.13     | 536.79 | 2.8  | 2 | '8/20  | 1597 |
| 472 | R.SVGGSGGGSFGDNLVT<br>R.S |  | 1 | 75.410      | 4.5e-006 | 783.88 | 0.8  | 2 | '9/32  | 3443 |
| 473 | K.TPGPGAQSALR.A           |  | 2 | 70.920      | 8.5e-006 | 527.79 | -0.7 | 2 | '9/20  | 2124 |
| 474 | R.SQIKDAQLQAR.C           |  | 1 | 39.490      | 0.018    | 457.92 | -0.9 | 3 | '12/22 | 2081 |
| 475 | R.EIESSPQYR.L             |  | 1 | 22.630      | 0.6      | 554.77 | -0.1 | 2 | '5/16  | 1557 |
| 476 | R.CQSLTEDLEFRK.S          |  | 1 | 43.470      | 0.0051   | 509.25 | -0.4 | 3 | '9/22  | 3791 |
| 477 | K.KKELEEIVQPIISK.L        |  | 1 | 28.950      | 0.046    | 552.00 | -2.2 | 3 | '8/26  | 5271 |
| 478 | R.EEKDNIQPTTE.-           |  | 1 | 43.010      | 0.0039   | 652.30 | 0.2  | 2 | '6/20  | 1364 |
| 479 | K.ALAAGGYDVEK.N           |  | 1 | 55.850      | 0.00036  | 547.28 | -0.9 | 2 | '7/20  | 2367 |
| 480 | R.SEVTDLR.R               |  | 1 | 32.460      | 0.086    | 410.21 | -0.4 | 2 | '4/12  | 1689 |
| 481 | K.IWHHTFYNELR.V           |  | 5 | 38.910      | 0.018    | 505.92 | -0.3 | 3 | '9/20  | 5627 |
| 482 | K.AGALNSNDAFVLT           |  | 4 | 75.600      | 4.6e-006 | 660.35 | -2.0 | 2 | '10/24 | 3962 |
| 483 | K.IIDAALR.A               |  | 1 | 40.050      | 0.012    | 386.24 | 0.3  | 2 | '5/12  | 2584 |
| 484 | K.IECVSAETTEDCIAK.I       |  | 4 | 82.100      | 3.2e-007 | 863.39 | 0.1  | 2 | '9/28  | 2717 |
| 485 | K.FETEQALR.L              |  | 1 | 25.850      | 0.42     | 497.25 | 0.2  | 2 | '6/14  | 2325 |
| 486 | K.LLADQAEAR.R             |  | 1 | 33.320      | 0.057    | 493.77 | 1.3  | 2 | '5/16  | 1899 |
| 487 | K.FETEQALR.M              |  | 1 | 25.850      | 0.42     | 497.25 | 0.2  | 2 | '6/14  | 2325 |
| 488 | K.TIDDEDKLC               |  | 4 | 27.790      | 0.3      | 397.22 | 1.8  | 3 | '11/18 | 3459 |
| 489 | R.IVATKPLYVALAQR.K        |  | 1 | 36.030      | 0.006    | 514.98 | -1.0 | 3 | '11/26 | 5186 |
| 490 | R.LSVDYGKK.S              |  | 1 | 30.060      | 0.097    | 303.84 | 0.1  | 3 | '6/14  | 1865 |
| 491 | R.AQIFANTVDNAR.I          |  | 2 | 67.500      | 3.2e-005 | 660.34 | -0.4 | 2 | '9/22  | 3145 |
| 492 | R.QATKDAGVIAGLNVLRI       |  | 2 | 48.870      | 0.00081  | 542.65 | -2.3 | 3 | '11/30 | 5067 |
| 493 | K.SNTAGSQSQVETEA.-        |  | 1 | 78.260      | 5.6e-007 | 704.81 | 0.1  | 2 | '17/26 | 1348 |
| 494 | R.GLGAPLTEDQQ.-           |  | 1 | 25.670      | 0.25     | 564.78 | -6.6 | 2 | '4/20  | 1541 |
| 495 | R.LEAAYLDLQR.I            |  | 1 | 66.230      | 3.8e-005 | 596.32 | -0.3 | 2 | '8/18  | 3998 |

|     |                        |               |    |        |          |        |      |   |        |      |
|-----|------------------------|---------------|----|--------|----------|--------|------|---|--------|------|
| 496 | K.GLSEDTTEETLK.E       |               | 1  | 55.580 | 0.00043  | 661.82 | 0.0  | 2 | '9/22  | 2410 |
| 497 | R.AGSGSQVTEPK.K        |               | 1  | 44.830 | 0.0034   | 579.29 | -0.2 | 2 | '12/22 | 1211 |
| 498 | R.AEGTFPGKI.-          |               | 1  | 32.910 | 0.092    | 460.25 | 7.5  | 2 | '11/16 | 3079 |
| 499 | R.DGDILGKYVD.-         |               | 1  | 45.400 | 0.0034   | 547.77 | 0.1  | 2 | '5/18  | 4250 |
| 500 | K.SLAAEEEEAR.Q         |               | 1  | 62.480 | 7.6e-005 | 523.76 | -0.7 | 2 | '8/18  | 1785 |
| 501 | R.LGLGEGAEK.S          |               | 1  | 43.270 | 0.0067   | 501.76 | 2.4  | 2 | '7/18  | 2230 |
| 502 | K.SLESINSR.L           |               | 1  | 37.710 | 0.03     | 453.24 | 0.9  | 2 | '5/14  | 1698 |
| 503 | R.EAPASVVPFVR.V        |               | 1  | 24.490 | 0.54     | 586.33 | -3.1 | 2 | '6/20  | 4240 |
| 504 | R.LQSIGTENTEENR.R      |               | 1  | 64.640 | 3.4e-005 | 745.86 | -0.1 | 2 | '10/24 | 1805 |
| 505 | K.VLTPELYAELR.A        |               | 1  | 48.630 | 0.0018   | 652.37 | 0.7  | 2 | '9/20  | 4900 |
| 506 | K.LSDGVAVLK.V          |               | 1  | 58.100 | 0.00026  | 451.27 | -0.3 | 2 | '8/16  | 2872 |
| 507 | K.GIAYIEFK.T           |               | 1  | 30.980 | 0.071    | 470.76 | 0.1  | 2 | '5/14  | 4285 |
| 508 | K.LEEAKEKADESER.G      |               | 28 | 60.100 | 0.00017  | 738.84 | -0.1 | 2 | '7/24  | 1644 |
| 509 | K.ITMQNLNDR.L          | 0.001000000.0 | 1  | 34.940 | 0.043    | 560.77 | -0.5 | 2 | '8/16  | 1450 |
| 510 | R.ALFRLSPTASR.S        |               | 1  | 23.420 | 0.58     | 406.90 | -0.4 | 3 | '11/20 | 4489 |
| 511 | K.SSFLVDCSK.A          |               | 1  | 52.770 | 0.00034  | 521.75 | -0.6 | 2 | '13/16 | 2888 |
| 512 | R.IVDGKVVSETNDTK.V     |               | 1  | 20.110 | 1.6      | 502.27 | -0.1 | 3 | '10/26 | 2294 |
| 513 | K.LSYEGEVTK.S          |               | 1  | 28.250 | 0.2      | 513.26 | -1.5 | 2 | '7/16  | 2045 |
| 514 | K.CGDLVFAK.M           |               | 1  | 56.960 | 0.00022  | 455.23 | -3.0 | 2 | '7/14  | 3220 |
| 515 | R.DDTVCLAK.L           |               | 4  | 40.620 | 0.01     | 461.22 | 0.0  | 2 | '8/14  | 1747 |
| 516 | K.LINQNCDSAR.T         |               | 1  | 35.870 | 0.023    | 595.78 | -1.0 | 2 | '7/18  | 1294 |
| 517 | R.EEILAQAKENEK.K       |               | 2  | 22.090 | 1.5      | 467.91 | 0.2  | 3 | '8/22  | 2455 |
| 518 | K.AGPIWDLR.L           |               | 2  | 25.860 | 0.28     | 464.26 | -0.9 | 2 | '5/14  | 4775 |
| 519 | K.NEGSESAPEGQAQR.<br>R |               | 1  | 42.330 | 0.0028   | 794.36 | 2.8  | 2 | '9/28  | 1021 |
| 520 | K.FSPAGPILSIR.I        |               | 1  | 36.330 | 0.031    | 579.34 | -0.8 | 2 | '7/20  | 4923 |
| 521 | K.TEADAECTFEK.Q        |               | 2  | 53.000 | 0.00069  | 699.32 | -1.8 | 2 | '10/22 | 1974 |
| 522 | R.QTVAVGVKAVDKK.A      |               | 1  | 22.710 | 0.11     | 364.73 | -0.3 | 4 | '7/26  | 4098 |
| 523 | R.AALLTER.T            |               | 1  | 38.290 | 0.08     | 387.23 | 0.9  | 2 | '6/12  | 2154 |
| 524 | K.YEEIDNAPEER.A        |               | 1  | 37.980 | 0.0055   | 682.80 | 0.1  | 2 | '6/20  | 2004 |
| 525 | K.HIAEEADRKYEEVAR.K    |               | 6  | 21.240 | 1.1      | 454.73 | 1.3  | 4 | '16/28 | 3519 |
| 526 | K.GTGASGSFKLNK.K       |               | 6  | 35.970 | 0.035    | 583.81 | -0.1 | 2 | '9/22  | 2475 |
| 527 | K.FENLCK.I             |               | 1  | 20.980 | 0.84     | 405.69 | 0.0  | 2 | '5/10  | 1793 |
| 528 | K.AAILEEK.R            |               | 2  | 37.160 | 0.1      | 387.23 | 15.5 | 2 | '4/12  | 2154 |
| 529 | R.LVNQEIEK.F           |               | 1  | 35.890 | 0.04     | 486.77 | 2.3  | 2 | '7/14  | 1653 |
| 530 | R.AAAEVNQDYGLDPK.I     |               | 1  | 84.880 | 3.3e-007 | 745.86 | -1.0 | 2 | '9/26  | 2686 |
| 531 | K.FENLCK.L             |               | 1  | 20.980 | 0.84     | 405.69 | 0.0  | 2 | '5/10  | 1793 |
| 532 | M.PGVTVKDVNQEFVR.A     |               | 1  | 55.760 | 0.0004   | 572.64 | -1.2 | 3 | '11/28 | 3622 |
| 533 | K.NQCTQVQER.E          |               | 1  | 49.600 | 0.001    | 631.30 | 1.7  | 2 | '6/18  | 1394 |
| 534 | R.LSELLR.Y             |               | 1  | 29.590 | 0.25     | 365.73 | 0.3  | 2 | '4/10  | 2851 |

|     |                        |  |   |        |          |        |      |   |        |      |
|-----|------------------------|--|---|--------|----------|--------|------|---|--------|------|
| 535 | R.LAYINPDLALEEK.N      |  | 1 | 54.950 | 0.00053  | 744.90 | 3.0  | 2 | '11/24 | 4699 |
| 536 | K.RKATGPPVSELITK.A     |  | 1 | 22.960 | 0.23     | 499.63 | 0.6  | 3 | '13/26 | 4988 |
| 537 | K.FSPAGPILSIR.V        |  | 2 | 36.330 | 0.031    | 579.34 | -0.8 | 2 | '7/20  | 4923 |
| 538 | R.SQAQQPQKEAALSS.-     |  | 1 | 48.050 | 0.0022   | 736.87 | 0.3  | 2 | '9/26  | 1560 |
| 539 | K.GPSSVEDIKAK.M        |  | 1 | 25.620 | 0.5      | 377.54 | -1.8 | 3 | '7/20  | 1902 |
| 540 | K.EQHQLWEEQLAAAK.A     |  | 2 | 29.840 | 0.32     | 452.99 | -0.4 | 4 | '13/28 | 4943 |
| 541 | K.SSAEVIAQAR.K         |  | 1 | 64.430 | 6.9e-005 | 516.28 | -0.6 | 2 | '8/18  | 1780 |
| 542 | R.MLITILGTVKPNANR.I    |  | 1 | 22.340 | 0.35     | 547.65 | -3.0 | 3 | '9/28  | 5584 |
| 543 | R.SQWSPALTISK.V        |  | 1 | 38.230 | 0.03     | 609.33 | -3.4 | 2 | '7/20  | 3887 |
| 544 | K.DVIEEYFK.C           |  | 1 | 27.270 | 0.16     | 521.76 | -0.1 | 2 | '5/14  | 4844 |
| 545 | K.SESPKEPEQLRK.L       |  | 1 | 22.370 | 1.4      | 476.59 | -0.6 | 3 | '8/22  | 2140 |
| 546 | R.NLLSVAYKNVVGAR.R     |  | 6 | 51.480 | 0.00051  | 752.44 | -0.7 | 2 | '8/26  | 5689 |
| 547 | R.GLFIIDDK.G           |  | 2 | 22.920 | 0.66     | 460.76 | 1.2  | 2 | '5/14  | 4768 |
| 548 | K.TIPLISQCTPK.V        |  | 1 | 54.040 | 0.00045  | 685.89 | 1.8  | 2 | '15/22 | 4629 |
| 549 | K.SELVANNVTLPAGEQRK.D  |  | 1 | 38.950 | 0.016    | 609.33 | 0.4  | 3 | '11/32 | 3272 |
| 550 | K.LFIGGLNTETNEK.A      |  | 1 | 76.960 | 3e-006   | 718.38 | 0.7  | 2 | '10/24 | 4117 |
| 551 | R.DFTPVCTTELGR.A       |  | 1 | 64.140 | 3.6e-005 | 698.33 | -0.4 | 2 | '9/22  | 3846 |
| 552 | K.FSVCVLGDQQHCDEAK.A   |  | 1 | 39.300 | 0.0046   | 631.61 | 1.2  | 3 | '13/30 | 3787 |
| 553 | R.DGKLVSESSDVLPK.-     |  | 3 | 75.140 | 4.7e-006 | 737.39 | -0.7 | 2 | '10/26 | 3479 |
| 554 | K.VTHAVVTPAYFNDAQR.Q   |  | 1 | 37.880 | 0.027    | 630.00 | 0.1  | 3 | '6/32  | 4386 |
| 555 | R.QTESLESLLSK.S        |  | 1 | 56.120 | 0.00042  | 617.83 | -0.5 | 2 | '7/20  | 4528 |
| 556 | R.STEPELIQVK.S         |  | 1 | 44.740 | 0.0099   | 572.32 | -0.4 | 2 | '7/18  | 3143 |
| 557 | K.TANKDHLVTAYNHLFETK.R |  | 1 | 38.150 | 0.022    | 526.27 | -1.2 | 4 | '18/34 | 5492 |
| 558 | K.TLQQQTFK.I           |  | 1 | 39.610 | 0.018    | 497.27 | -0.1 | 2 | '7/14  | 1948 |
| 559 | K.LEDGPKFLK.S          |  | 1 | 40.710 | 0.014    | 349.53 | 0.0  | 3 | '8/16  | 4218 |
| 560 | R.SLQQLAEER.S          |  | 2 | 38.100 | 0.026    | 537.28 | 2.7  | 2 | '7/16  | 2944 |
| 561 | R.TFIAIKPDGVQR.G       |  | 1 | 33.110 | 0.071    | 448.93 | 0.7  | 3 | '5/22  | 3813 |
| 562 | R.LKATVTPSPVKGK.G      |  | 2 | 27.070 | 0.057    | 442.61 | 0.0  | 3 | '5/24  | 2675 |
| 563 | K.SHEAEVLKQLAEKR.E     |  | 1 | 31.340 | 0.078    | 410.23 | 0.1  | 4 | '13/26 | 4783 |
| 564 | R.FCEAEFSVK.T          |  | 1 | 32.370 | 0.028    | 558.76 | -0.2 | 2 | '7/16  | 3402 |
| 565 | R.HLYTSGPHGLSSCFLR.I   |  | 1 | 25.170 | 0.39     | 611.30 | -2.8 | 3 | '11/30 | 5524 |
| 566 | R.LKDLEALLNSK.E        |  | 2 | 49.370 | 0.0018   | 622.37 | -1.5 | 2 | '9/20  | 5048 |
| 567 | K.VTQVDGNPVR.F         |  | 1 | 53.280 | 0.00056  | 586.30 | -3.9 | 2 | '8/20  | 1552 |
| 568 | R.TWNDPSVQQDIK.F       |  | 1 | 71.700 | 8.2e-006 | 715.85 | -0.9 | 2 | '9/22  | 3085 |
| 569 | R.VAVQGDVVR.E          |  | 1 | 45.740 | 0.0029   | 471.77 | -1.4 | 2 | '8/16  | 1861 |
| 570 | K.ADLINNLGTIAK.S       |  | 2 | 56.990 | 0.00036  | 621.86 | -0.5 | 2 | '15/22 | 4438 |



|     |                                           |  |    |        |          |             |       |   |        |      |
|-----|-------------------------------------------|--|----|--------|----------|-------------|-------|---|--------|------|
| 571 | K.LCYVALDFENEMATAAS<br>SSSLEK.S           |  | 3  | 92.880 | 3.7e-008 | 1268.5<br>8 | -0.7  | 2 | '14/44 | 6057 |
| 572 | R.LQDSGTFQCVAR.D                          |  | 1  | 46.650 | 0.0036   | 691.33      | -0.2  | 2 | '8/22  | 2725 |
| 573 | R.SYTSGPSR.I                              |  | 1  | 25.900 | 0.15     | 456.22      | 2.6   | 2 | '4/16  | 1176 |
| 574 | K.YAVLYQPLDFKR.F                          |  | 1  | 20.040 | 1.3      | 504.95      | 1.3   | 3 | '13/22 | 5178 |
| 575 | K.ALYETELADAR.R                           |  | 1  | 80.980 | 1.1e-006 | 626.32      | 2.8   | 2 | '8/20  | 3449 |
| 576 | R.WCAVSEHEATK.C                           |  | 21 | 63.970 | 2.2e-005 | 659.30      | 0.5   | 2 | '9/20  | 2301 |
| 577 | R.QLEEQLR.I                               |  | 4  | 40.850 | 0.012    | 458.25      | 2.1   | 2 | '5/12  | 1987 |
| 578 | R.VAQLEQVYIRGSK.I                         |  | 1  | 29.470 | 0.12     | 497.62      | -0.4  | 3 | '12/24 | 3567 |
| 579 | R.FEKPLEEK.G                              |  | 1  | 21.590 | 1.2      | 340.52      | -0.9  | 3 | '8/14  | 2522 |
| 580 | K.NRVIGSGCNLDSAR.F                        |  | 2  | 28.530 | 0.22     | 506.92      | 6.5   | 3 | '5/26  | 3089 |
| 581 | R.IVAPPGGR.A                              |  | 1  | 27.060 | 0.14     | 383.73      | 0.7   | 2 | '4/14  | 1419 |
| 582 | K.VNGDASPAAAESGAK.E                       |  | 1  | 53.730 | 0.00043  | 672.83      | 3.6   | 2 | '10/28 | 1196 |
| 583 | K.SISISVAR.G                              |  | 1  | 29.310 | 0.16     | 416.75      | 0.7   | 2 | '5/14  | 2655 |
| 584 | K.LAGESESNL.R.K                           |  | 1  | 47.220 | 0.0029   | 538.27      | 0.1   | 2 | '9/18  | 1727 |
| 585 | R.ILSGVVT.K.M                             |  | 1  | 33.000 | 0.027    | 408.76      | 0.4   | 2 | '6/14  | 2543 |
| 586 | K.KITIADCGQLE.-                           |  | 1  | 74.710 | 5.7e-006 | 624.32      | 0.2   | 2 | '9/20  | 3305 |
| 587 | R.ALVILAK.G                               |  | 1  | 31.350 | 0.033    | 364.26      | 0.3   | 2 | '6/12  | 3455 |
| 588 | K.EGIPPQQR.L                              |  | 2  | 23.110 | 0.63     | 526.78      | 3.7   | 2 | '8/16  | 1243 |
| 589 | R.STFSTNYR.S                              |  | 2  | 25.990 | 0.21     | 488.23      | 0.1   | 2 | '5/14  | 1956 |
| 590 | R.TSSGSSSSSSTPSSQPS<br>SQGGSQPGSQAGSSER.T |  | 1  | 50.980 | 0.00013  | 1020.1<br>1 | 0.6   | 3 | '20/64 | 1212 |
| 591 | R.SSGPYGGGQYFAKPR<br>.N                   |  | 2  | 97.520 | 2.1e-008 | 814.90      | 0.9   | 2 | '12/30 | 3602 |
| 592 | K.ELTDEEAER.L                             |  | 1  | 65.140 | 2e-005   | 546.25      | -0.4  | 2 | '7/16  | 1310 |
| 593 | R.LEEETRK.R                               |  | 1  | 24.810 | 0.57     | 452.73      | -13.0 | 2 | '4/12  | 1442 |
| 595 | R.GTPQQIDYAR.Q                            |  | 1  | 32.840 | 0.079    | 574.79      | 2.2   | 2 | '8/18  | 1949 |
| 596 | K.ALLLLCGEDD.-                            |  | 1  | 38.600 | 0.016    | 559.77      | 0.1   | 2 | '5/18  | 5484 |
| 597 | K.IKSEHPGLSIGDTAK.K                       |  | 2  | 49.220 | 0.0019   | 518.28      | -0.1  | 3 | '10/28 | 3564 |
| 598 | R.GIVEQCCTSICSLYQLEN<br>YCN.-             |  | 1  | 34.470 | 0.0055   | 871.03      | -1.8  | 3 | '18/40 | 5671 |
| 599 | K.LELSDNR.V                               |  | 1  | 24.520 | 1.1      | 423.72      | 0.5   | 2 | '3/12  | 1676 |
| 600 | R.LEEQLGR.G                               |  | 1  | 41.320 | 0.021    | 422.73      | 0.7   | 2 | '5/12  | 1624 |
| 601 | R.NQGGYGGSSSSSSYGS<br>GRRF.-              |  | 1  | 36.660 | 0.0071   | 666.63      | 0.1   | 3 | '13/38 | 3024 |
| 602 | R.QVDNASLAR.L                             |  | 1  | 29.400 | 0.14     | 544.77      | -1.4  | 2 | '8/18  | 1534 |
| 603 | K.AINQQTGAFVEISR.Q                        |  | 1  | 96.360 | 3.9e-008 | 767.41      | 0.8   | 2 | '9/26  | 3675 |
| 604 | K.AVTEQGHLSNEER.N                         |  | 1  | 52.840 | 0.00068  | 533.58      | -0.9  | 3 | '16/26 | 2022 |
| 605 | R.NAEQYKDQADKASTR.L                       |  | 2  | 47.670 | 0.002    | 575.61      | -0.3  | 3 | '17/28 | 1859 |
| 606 | R.LECVPNCR.S                              |  | 1  | 36.720 | 0.0073   | 588.76      | -0.5  | 2 | '7/16  | 1672 |
| 607 | K.EDLQELNDR.L                             |  | 1  | 38.970 | 0.006    | 566.26      | -14.2 | 2 | '6/16  | 2312 |

|     |                              |                   |   |        |          |        |      |   |        |      |
|-----|------------------------------|-------------------|---|--------|----------|--------|------|---|--------|------|
| 608 | R.IVAPPGGR.S                 |                   | 2 | 27.060 | 0.14     | 383.73 | 0.7  | 2 | '4/14  | 1419 |
| 609 | R.QLSSGVSEIR.H               |                   | 1 | 49.850 | 0.0018   | 538.29 | -1.4 | 2 | '9/18  | 2348 |
| 610 | K.SAAQAAAQTNSNAAGK<br>QLRK.E |                   | 1 | 21.580 | 0.99     | 497.27 | 0.1  | 4 | '17/38 | 2260 |
| 611 | K.TVTAMDVVYALKR.Q            | 0.0000100000000.0 | 2 | 49.320 | 0.0012   | 741.90 | -1.1 | 2 | '9/24  | 4601 |
| 612 | K.VESLEQEAANER.Q             |                   | 1 | 51.290 | 0.00065  | 687.83 | 1.5  | 2 | '8/22  | 2465 |
| 613 | K.IQKLLQDFFNKG.E             |                   | 2 | 35.940 | 0.026    | 484.27 | -0.3 | 3 | '6/22  | 6006 |
| 614 | K.VEEAEPEEFVVEK.V            |                   | 1 | 62.160 | 6.8e-005 | 767.37 | -1.0 | 2 | '17/24 | 3520 |
| 615 | K.AQPAQPADEPAEK.A            |                   | 1 | 23.380 | 0.57     | 676.33 | 1.8  | 2 | '9/24  | 1089 |
| 616 | K.TEWLDGKHVVFGK.V            |                   | 6 | 66.400 | 3.7e-005 | 758.40 | -1.2 | 2 | '15/24 | 4868 |
| 617 | K.TQDQISNIK.Y                |                   | 1 | 27.800 | 0.33     | 523.78 | -1.1 | 2 | '9/16  | 1614 |
| 618 | K.IFVGGLNPEATEEK.I           |                   | 1 | 77.910 | 2.6e-006 | 752.39 | 0.6  | 2 | '11/26 | 3969 |
| 619 | R.TINEVENQILTR.D             |                   | 2 | 68.330 | 2.3e-005 | 715.39 | 0.1  | 2 | '9/22  | 4044 |
| 620 | K.NLYIISVK.G                 |                   | 1 | 20.750 | 0.41     | 475.29 | 3.9  | 2 | '5/14  | 4242 |
| 621 | R.LTEQKGEQQIQK.A             |                   | 1 | 28.320 | 0.23     | 477.26 | -0.1 | 3 | '8/22  | 1611 |
| 622 | K.EQSQTATQTR.T               |                   | 1 | 40.110 | 0.015    | 631.82 | -1.0 | 2 | '8/20  | 1245 |
| 623 | K.TGISDVFAK.N                |                   | 1 | 39.260 | 0.014    | 469.25 | 2.0  | 2 | '7/16  | 3804 |
| 624 | R.AGLQFPVGR.I                |                   | 2 | 52.740 | 0.0011   | 472.77 | 0.0  | 2 | '13/16 | 3768 |
| 625 | K.HIAEDSDRKYEEVAR.K          |                   | 2 | 31.040 | 0.1      | 455.22 | -0.6 | 4 | '14/28 | 3045 |
| 626 | K.EFSPFGTITSAK.V             |                   | 1 | 48.600 | 0.0016   | 642.83 | -3.3 | 2 | '7/22  | 4633 |
| 627 | R.VISSIEQK.T                 |                   | 6 | 35.690 | 0.047    | 452.26 | 0.0  | 2 | '6/14  | 1791 |
| 628 | R.TKFETEALR.L                |                   | 1 | 34.670 | 0.049    | 408.22 | -2.9 | 3 | '10/18 | 2967 |
| 629 | R.GFGVLFK.D                  |                   | 1 | 39.080 | 0.016    | 457.76 | -1.1 | 2 | '6/14  | 5971 |
| 630 | R.YALYDATYETK.E              |                   | 1 | 45.990 | 0.0021   | 669.32 | 0.6  | 2 | '9/20  | 3441 |
| 631 | R.TKFETEALR.M                |                   | 1 | 34.670 | 0.049    | 408.22 | -2.9 | 3 | '10/18 | 2967 |
| 632 | R.GFGVLFK.E                  |                   | 1 | 39.080 | 0.016    | 457.76 | -1.1 | 2 | '6/14  | 5971 |
| 633 | K.EVYQQQQYGSGGRGN<br>R.N     |                   | 1 | 26.530 | 0.2      | 609.62 | -0.3 | 3 | '7/30  | 2153 |
| 634 | K.HSTIFENLANKADR.D           |                   | 6 | 60.960 | 0.00013  | 539.28 | -1.4 | 3 | '17/26 | 4909 |
| 635 | K.LAQAEQLEQETR.E             |                   | 2 | 49.330 | 0.0015   | 772.88 | -0.3 | 2 | '7/24  | 2759 |
| 636 | R.EECDKYALQSQQR.W            |                   | 1 | 29.560 | 0.071    | 552.26 | 1.3  | 3 | '11/24 | 2035 |
| 637 | R.LIVENLSSR.C                |                   | 2 | 58.640 | 0.00021  | 515.80 | 0.7  | 2 | '8/16  | 3248 |
| 638 | K.LEVQAEER.K                 |                   | 1 | 54.580 | 0.00039  | 551.77 | -0.7 | 2 | '7/16  | 1696 |
| 639 | K.DLSLEEIQK.K                |                   | 2 | 38.020 | 0.029    | 537.79 | -1.5 | 2 | '7/16  | 3693 |
| 640 | R.VFIGNLNTALVK.K             |                   | 1 | 43.730 | 0.0025   | 644.89 | 0.4  | 2 | '14/22 | 4840 |
| 641 | K.AQYEDIANR.S                |                   | 1 | 58.630 | 0.00012  | 540.26 | -0.1 | 2 | '6/16  | 1945 |
| 642 | R.SRSGGLGGACGGAGF<br>GSR.S   |                   | 1 | 46.640 | 0.0013   | 556.59 | -3.6 | 3 | '11/36 | 3388 |
| 643 | K.TLVSVTK.E                  |                   | 2 | 21.760 | 0.48     | 374.23 | 0.5  | 2 | '3/12  | 1913 |
| 644 | K.SGAEVEAGDAAER.R            |                   | 1 | 75.230 | 1.6e-006 | 631.29 | 0.4  | 2 | '10/24 | 1312 |

|     |                       |  |   |        |          |        |      |   |        |      |
|-----|-----------------------|--|---|--------|----------|--------|------|---|--------|------|
| 645 | R.LQAEAQLR.K          |  | 1 | 47.860 | 0.0021   | 528.79 | -0.2 | 2 | '6/16  | 1857 |
| 646 | R.LCVDPR.H            |  | 1 | 36.940 | 0.011    | 380.19 | -0.4 | 2 | '5/10  | 1804 |
| 647 | R.QATKDAGTIAGLNVL.R.I |  | 1 | 70.590 | 8.8e-006 | 543.31 | 2.5  | 3 | '15/30 | 4411 |
| 648 | R.AGLQFPVGR.V         |  | 2 | 52.740 | 0.0011   | 472.77 | 0.0  | 2 | '13/16 | 3768 |
| 649 | R.ALQLEER.K           |  | 1 | 30.360 | 0.13     | 494.26 | 1.1  | 2 | '7/14  | 2315 |
| 650 | K.YGVNPGPIVGTTRK.L    |  | 1 | 31.960 | 0.091    | 486.94 | 0.5  | 3 | '13/26 | 3368 |
| 651 | R.ITRYQGVNLYVK.N      |  | 1 | 22.500 | 0.42     | 485.28 | 1.8  | 3 | '15/22 | 3907 |
| 652 | R.TTTGSYIANR.V        |  | 1 | 62.300 | 6.7e-005 | 542.28 | 0.6  | 2 | '8/18  | 1623 |
| 653 | K.YATPAPSAK.S         |  | 1 | 25.170 | 0.52     | 453.24 | 0.3  | 2 | '4/16  | 1217 |
| 654 | K.FESPEVAER.A         |  | 1 | 48.710 | 0.0013   | 532.26 | 0.2  | 2 | '8/16  | 2209 |
| 655 | R.ISHELDSASSEVN.-     |  | 1 | 47.990 | 0.00095  | 694.32 | -0.4 | 2 | '7/24  | 2279 |
| 656 | R.SGVSLAALKK.A        |  | 2 | 60.990 | 4.7e-005 | 487.31 | 0.2  | 2 | '9/18  | 3030 |
| 657 | K.VQVEYKGETK.S        |  | 2 | 47.890 | 0.0024   | 590.81 | -0.2 | 2 | '12/18 | 1632 |
| 658 | K.VQVEYKGETK.T        |  | 2 | 47.890 | 0.0024   | 590.81 | -0.2 | 2 | '12/18 | 1632 |
| 659 | K.YVIYIER.V           |  | 1 | 28.010 | 0.16     | 478.27 | 0.1  | 2 | '5/12  | 3687 |
| 660 | K.ELEEIVQPIISK.L      |  | 1 | 48.840 | 0.0013   | 699.40 | -0.4 | 2 | '14/22 | 4682 |
| 661 | R.GAPLVVICQGK.I       |  | 1 | 47.420 | 0.002    | 571.32 | -3.2 | 2 | '13/20 | 3373 |
| 662 | R.LVEPGSPA EK.A       |  | 1 | 24.680 | 0.38     | 513.78 | 0.7  | 2 | '5/18  | 1651 |
| 663 | R.DTDSSVASEVR.S       |  | 1 | 86.850 | 1.8e-007 | 583.27 | 0.9  | 2 | '9/20  | 1786 |
| 664 | K.NLQYYDISAK.S        |  | 1 | 44.320 | 0.0041   | 607.81 | -0.4 | 2 | '8/18  | 3365 |
| 665 | K.EEDEEPESPPEK.K      |  | 1 | 32.190 | 0.01     | 707.80 | -0.6 | 2 | '6/22  | 1200 |
| 666 | K.FENWGACDGGTGTK.V    |  | 1 | 57.490 | 2.5e-005 | 750.31 | -0.7 | 2 | '12/26 | 2867 |
| 667 | R.ANSAGATRAVEVLPK.A   |  | 2 | 33.410 | 0.058    | 495.28 | -0.8 | 3 | '16/28 | 3200 |
| 668 | R.ALDVNVALRK.I        |  | 1 | 19.640 | 0.86     | 366.89 | 0.4  | 3 | '9/18  | 3320 |
| 669 | K.SNFNSADDIK.S        |  | 2 | 58.950 | 6.4e-005 | 599.27 | -6.2 | 2 | '8/20  | 1984 |
| 670 | K.FASFIDKVR.F         |  | 9 | 34.580 | 0.036    | 361.54 | -0.4 | 3 | '10/16 | 4396 |
| 671 | K.FGEVDCTIK.M         |  | 1 | 56.700 | 0.00026  | 584.29 | -0.9 | 2 | '6/18  | 3400 |
| 672 | K.ISEKEEVTTTR.E       |  | 1 | 54.020 | 0.00067  | 397.88 | -0.1 | 3 | '11/18 | 1492 |
| 673 | R.RQVDQLTNDKAR.V      |  | 1 | 66.310 | 3.8e-005 | 481.93 | -0.1 | 3 | '8/22  | 2220 |
| 674 | R.TASGSSVTSLDGTR.S    |  | 1 | 32.390 | 0.092    | 669.83 | -0.8 | 2 | '10/26 | 1952 |
| 675 | K.YEELQVTAGK.H        |  | 1 | 52.280 | 0.00098  | 569.29 | -3.6 | 2 | '14/18 | 3091 |
| 676 | R.AQYDELARK.N         |  | 2 | 31.680 | 0.094    | 365.19 | -0.5 | 3 | '11/16 | 2156 |
| 677 | R.ALHSLLLR.L          |  | 1 | 24.500 | 0.059    | 308.20 | -0.3 | 3 | '9/14  | 4637 |
| 678 | R.SGGGGGGGLSGGSIR.S   |  | 1 | 84.490 | 4.1e-007 | 616.80 | -0.6 | 2 | '14/30 | 2135 |
| 679 | K.ATDLGGTSQAGTSQR.F   |  | 1 | 83.470 | 5.3e-007 | 725.35 | 0.5  | 2 | '10/28 | 1266 |
| 680 | K.YEKDVADYKSK.G       |  | 1 | 33.810 | 0.054    | 337.17 | 1.0  | 4 | '7/20  | 1971 |
| 681 | R.SGFSSVSVSR.S        |  | 1 | 70.830 | 7.8e-006 | 506.76 | -0.6 | 2 | '9/18  | 2346 |
| 682 | R.EAVIAAAFAK.L        |  | 1 | 38.630 | 0.018    | 495.78 | 0.3  | 2 | '7/18  | 3882 |
| 683 | R.LQAEIEGLK.G         |  | 1 | 35.240 | 0.044    | 500.79 | -0.6 | 2 | '6/16  | 3078 |

|     |                             |  |   |         |          |        |      |   |        |      |
|-----|-----------------------------|--|---|---------|----------|--------|------|---|--------|------|
| 684 | K.CDEWSVNSVGK.I             |  | 2 | 76.020  | 9.5e-007 | 640.78 | -0.2 | 2 | '9/20  | 3003 |
| 685 | K.SVTEQGAELSNEER.N          |  | 2 | 113.220 | 3.8e-010 | 774.86 | -0.6 | 2 | '11/26 | 2017 |
| 686 | R.AEVNGLAAQGK.Y             |  | 2 | 65.080  | 3.4e-005 | 529.29 | 0.9  | 2 | '8/20  | 1593 |
| 687 | K.VVSEQKDTLGNTQIK.Q         |  | 1 | 36.310  | 0.033    | 553.97 | -0.4 | 3 | '13/28 | 2419 |
| 688 | K.IFNLYPR.K                 |  | 2 | 41.470  | 0.0076   | 461.76 | 0.7  | 2 | '6/12  | 4414 |
| 689 | K.SAAQAAAQTNSNAAGK<br>QLR.K |  | 1 | 54.530  | 0.00049  | 619.99 | 1.3  | 3 | '12/36 | 2005 |
| 690 | M.PEFLEDPSVLTKDK.L          |  | 1 | 20.480  | 1.4      | 539.95 | -2.4 | 3 | '8/26  | 4420 |
| 691 | R.YSLSGGGTSSH.-             |  | 1 | 50.700  | 0.00042  | 526.74 | -0.7 | 2 | '10/20 | 1538 |
| 692 | R.SGVSLAALK.K               |  | 1 | 54.940  | 0.00048  | 423.26 | 0.1  | 2 | '7/16  | 3264 |
| 693 | R.DGEEAGAYDGPR.T            |  | 3 | 55.850  | 3.8e-005 | 618.76 | -0.2 | 2 | '8/22  | 1751 |
| 694 | R.ALQNPNTNAEVLK.V           |  | 1 | 46.490  | 0.003    | 677.87 | -0.1 | 2 | '9/24  | 2874 |
| 695 | K.EAALSTALSEKR.T            |  | 1 | 26.980  | 0.3      | 425.90 | 0.6  | 3 | '10/22 | 2765 |
| 696 | K.EELQANGSAPAADK.E          |  | 1 | 69.290  | 1.1e-005 | 700.84 | -1.1 | 2 | '10/26 | 1416 |
| 697 | K.SVTGTDVDIVFSK.V           |  | 1 | 54.320  | 0.00073  | 684.35 | -5.0 | 2 | '10/24 | 4329 |
| 698 | R.TYDETYQR.Y                |  | 2 | 30.360  | 0.032    | 538.24 | -0.9 | 2 | '7/14  | 1343 |
| 699 | R.DGRGALQNIIPASTGAA<br>K.A  |  | 1 | 25.970  | 0.3      | 580.65 | -1.0 | 3 | '17/34 | 4086 |
| 700 | K.SEETLDEGPPKYTK.S          |  | 1 | 45.150  | 0.0042   | 531.93 | 0.7  | 3 | '7/26  | 2395 |
| 701 | K.DSPSVWAAVPGK.T            |  | 1 | 50.360  | 0.001    | 607.31 | 1.0  | 2 | '8/22  | 3920 |
| 702 | K.EAVAPVQEEEDLEK.K          |  | 1 | 53.790  | 0.00048  | 772.38 | 2.1  | 2 | '8/26  | 2680 |
| 703 | K.GSGTAEVELK.K              |  | 1 | 28.580  | 0.25     | 495.76 | 1.8  | 2 | '6/18  | 1723 |
| 704 | K.SADTLWGIQK.E              |  | 1 | 45.640  | 0.0051   | 559.80 | 1.0  | 2 | '13/18 | 3958 |
| 705 | K.FENWGACDGGTGTKVR.<br>Q    |  | 1 | 22.630  | 1.2      | 585.60 | -1.0 | 3 | '16/30 | 3499 |
| 706 | R.LELCDER.V                 |  | 1 | 34.190  | 0.036    | 467.72 | -0.7 | 2 | '6/12  | 2136 |
| 707 | R.WCAVQQQVDEK.T             |  | 1 | 47.880  | 0.0011   | 660.30 | -2.0 | 2 | '14/20 | 2430 |
| 708 | R.LQQENSILR.D               |  | 1 | 42.020  | 0.012    | 550.81 | -0.2 | 2 | '7/16  | 2544 |
| 709 | R.LGYTPVCR.A                |  | 1 | 33.030  | 0.065    | 483.25 | -4.0 | 2 | '6/14  | 2386 |
| 710 | K.EEDEEPESPPEKK.T           |  | 3 | 45.650  | 0.00092  | 771.84 | -2.9 | 2 | '7/24  | 1151 |
| 711 | K.SQLVYQSR.R                |  | 1 | 27.470  | 0.25     | 490.76 | 0.0  | 2 | '8/14  | 1806 |
| 712 | K.THPHFVIPYR.C              |  | 1 | 23.250  | 0.67     | 422.90 | 0.9  | 3 | '7/18  | 5185 |
| 713 | K.TDEGIAYR.G                |  | 1 | 40.010  | 0.008    | 462.72 | -0.9 | 2 | '7/14  | 1738 |
| 714 | K.TGGAVDRLTDTSR.Y           |  | 1 | 25.080  | 0.53     | 450.23 | 0.2  | 3 | '9/24  | 2830 |
| 715 | R.ALANSLACQGK.Y             |  | 1 | 53.260  | 0.00077  | 566.79 | -3.6 | 2 | '7/20  | 2143 |
| 716 | R.KLLEGEER.L                |  | 3 | 37.930  | 0.03     | 551.79 | -0.5 | 2 | '7/16  | 2672 |
| 717 | R.SLLEGQEDHYNNLSASK<br>VL.- |  | 1 | 33.990  | 0.074    | 706.35 | -1.3 | 3 | '8/36  | 5058 |
| 718 | K.DLLFK.D                   |  | 3 | 27.850  | 0.12     | 318.19 | -0.5 | 2 | '4/8   | 3948 |
| 719 | K.EEAPDILCLQETK.C           |  | 1 | 62.550  | 7e-005   | 773.38 | 1.4  | 2 | '9/24  | 4317 |

|     |                                 |  |   |        |          |        |      |   |        |      |
|-----|---------------------------------|--|---|--------|----------|--------|------|---|--------|------|
| 720 | R.FFSDCKIQNGAQQIR.F             |  | 1 | 43.900 | 0.0059   | 580.96 | 2.0  | 3 | '13/28 | 3985 |
| 721 | K.LCFSTAQHAS.-                  |  | 1 | 41.420 | 0.0085   | 561.26 | -0.4 | 2 | '7/18  | 2420 |
| 722 | R.IRIDSLSAQLSQLQK.Q             |  | 1 | 23.370 | 0.28     | 567.33 | -0.4 | 3 | '12/28 | 5210 |
| 723 | R.LLIPRWR.E                     |  | 2 | 30.100 | 0.018    | 477.31 | -1.3 | 2 | '4/12  | 4361 |
| 724 | K.AEHDQLLLNYAKK.E               |  | 1 | 21.920 | 1        | 386.46 | 0.3  | 4 | '8/24  | 4199 |
| 725 | R.YRPGTVALR.E                   |  | 2 | 30.440 | 0.1      | 344.87 | 0.5  | 3 | '6/16  | 3104 |
| 726 | K.LSSSFSSR.G                    |  | 1 | 30.990 | 0.059    | 435.72 | -0.1 | 2 | '4/14  | 1599 |
| 727 | R.EACGVIVELIK.S                 |  | 1 | 38.560 | 0.024    | 615.84 | 1.8  | 2 | '6/20  | 5125 |
| 728 | R.LAPEYEAAATR.L                 |  | 3 | 73.200 | 8.2e-006 | 596.30 | -0.8 | 2 | '10/20 | 2259 |
| 729 | R.TLSDYNIQK.E                   |  | 2 | 36.100 | 0.034    | 541.28 | -0.1 | 2 | '14/16 | 2401 |
| 730 | R.AEDGENYDIK.K                  |  | 1 | 27.940 | 0.22     | 577.25 | -0.3 | 2 | '5/18  | 1718 |
| 731 | R.FKSHTDQLVLIFAGK.I             |  | 1 | 29.980 | 0.095    | 568.66 | 2.1  | 3 | '7/28  | 6068 |
| 732 | K.HQTVPQNTGGKNPDPW<br>AKNLNEK.D |  | 2 | 24.860 | 0.44     | 644.08 | -0.3 | 4 | '14/44 | 3891 |
| 733 | R.SSASFSTTAVSAR.Y               |  | 1 | 91.020 | 8.2e-008 | 636.32 | 0.4  | 2 | '9/24  | 2235 |
| 734 | K.GLGLDESGLAK.Q                 |  | 1 | 36.780 | 0.04     | 530.29 | 1.2  | 2 | '5/20  | 3427 |
| 735 | K.SAEIDSDDTGGSAQK.<br>Q         |  | 1 | 93.470 | 2e-008   | 776.34 | -0.9 | 2 | '12/30 | 1171 |
| 736 | R.ADGYVLEGK.E                   |  | 1 | 40.870 | 0.01     | 476.24 | 1.6  | 2 | '7/16  | 2295 |
| 737 | M.PEPVKSAPVPK.K                 |  | 1 | 32.860 | 0.046    | 383.56 | 0.3  | 3 | '8/20  | 2231 |
| 738 | R.LTIAEER.D                     |  | 1 | 28.320 | 0.33     | 416.23 | 1.0  | 2 | '6/12  | 1906 |
| 739 | K.IGGIGTVPVGR.V                 |  | 2 | 63.790 | 1.9e-005 | 513.31 | -0.1 | 2 | '7/20  | 3173 |
| 740 | R.SRKESYSIYVYK.V                |  | 1 | 38.530 | 0.02     | 508.27 | 0.7  | 3 | '9/22  | 4031 |
| 741 | R.VEIIANDQGNR.I                 |  | 1 | 66.110 | 3.2e-005 | 614.82 | -0.2 | 2 | '8/20  | 2085 |
| 742 | R.VLSSIEQK.S                    |  | 2 | 35.690 | 0.047    | 452.26 | 0.0  | 2 | '6/14  | 1791 |
| 743 | K.ESNGPVKVVWGSIK.G              |  | 2 | 43.060 | 0.0081   | 700.88 | 0.6  | 2 | '9/24  | 4610 |
| 744 | R.FDSDAASPR.E                   |  | 4 | 73.910 | 1.8e-005 | 483.22 | 1.7  | 2 | '8/16  | 1252 |
| 745 | K.AINQGGLTSVAVR.G               |  | 1 | 67.820 | 2.4e-005 | 643.36 | -0.2 | 2 | '9/24  | 3087 |
| 746 | K.ADVQSIIGLQR.F                 |  | 1 | 28.960 | 0.23     | 600.35 | 7.8  | 2 | '8/20  | 4245 |
| 747 | R.AITIASQTNCPLYVTK.V            |  | 1 | 63.280 | 8.3e-005 | 890.47 | -0.3 | 2 | '10/30 | 3905 |
| 748 | R.FDSDAASPR.G                   |  | 7 | 73.910 | 1.8e-005 | 483.22 | 1.7  | 2 | '8/16  | 1252 |
| 749 | R.VGPSNQPSTSAR.A                |  | 1 | 23.980 | 0.48     | 600.80 | 1.0  | 2 | '7/22  | 1102 |
| 750 | R.KLVIIESDLER.A                 |  | 8 | 32.440 | 0.075    | 438.93 | 0.0  | 3 | '8/20  | 4555 |
| 751 | R.IYVGNLPPDIR.T                 |  | 2 | 57.770 | 0.00023  | 628.85 | 1.3  | 2 | '9/20  | 4114 |
| 752 | K.EVYFAER.V                     |  | 1 | 26.960 | 0.13     | 457.22 | -0.4 | 2 | '4/12  | 2674 |
| 753 | R.AADALEEQQR.C                  |  | 2 | 40.680 | 0.0079   | 565.77 | -3.8 | 2 | '7/18  | 1378 |
| 754 | K.QKVDSLLENLEK.I                |  | 3 | 23.760 | 0.65     | 472.60 | -0.2 | 3 | '7/22  | 4998 |
| 755 | K.GAVAEDGDELR.T                 |  | 1 | 74.600 | 2.4e-006 | 566.27 | 0.0  | 2 | '9/20  | 1884 |
| 756 | R.LKQQSELQSQVR.Y                |  | 1 | 46.170 | 0.0036   | 481.94 | -0.3 | 3 | '7/22  | 2472 |
| 757 | K.IKGEHPGLSIGDVAK.K             |  | 2 | 43.490 | 0.0051   | 507.62 | -0.4 | 3 | '8/28  | 4462 |

|     |                             |                             |   |         |          |        |      |   |        |      |
|-----|-----------------------------|-----------------------------|---|---------|----------|--------|------|---|--------|------|
| 758 | K.LVSESSDVLPK.-             |                             | 1 | 64.240  | 0.00012  | 587.32 | -0.9 | 2 | '7/20  | 2740 |
| 759 | K.LLQDFFNGKELNK.S           |                             | 3 | 24.030  | 0.77     | 522.61 | -2.0 | 3 | '11/24 | 5201 |
| 760 | R.FDSDAASPR.T               |                             | 2 | 73.910  | 1.8e-005 | 483.22 | 1.7  | 2 | '8/16  | 1252 |
| 761 | R.KESYSVYVYK.V              |                             | 4 | 67.420  | 2.8e-005 | 633.32 | -1.0 | 2 | '7/18  | 3096 |
| 762 | R.CEDVNECEAQR.C             |                             | 1 | 71.200  | 4.1e-007 | 705.28 | 2.5  | 2 | '7/20  | 1116 |
| 763 | R.FSAVALCK.A                |                             | 1 | 33.090  | 0.057    | 448.24 | 0.6  | 2 | '11/14 | 2914 |
| 764 | K.FGEVVDCTLK.L              |                             | 1 | 56.700  | 0.00026  | 584.29 | -0.9 | 2 | '6/18  | 3400 |
| 765 | R.SAEYGSSLQSSR.S            |                             | 1 | 68.590  | 8.9e-006 | 636.30 | -1.3 | 2 | '9/22  | 1700 |
| 766 | K.CLKDGAGDVAFVK.H           |                             | 6 | 78.100  | 3.1e-006 | 690.35 | -2.2 | 2 | '8/24  | 3839 |
| 767 | K.SATEYKNEEYQR.S            |                             | 1 | 30.950  | 0.054    | 506.57 | 0.7  | 3 | '8/22  | 1667 |
| 768 | R.IAEFTTNLTETEEK.S          |                             | 1 | 109.230 | 1.7e-009 | 827.40 | 1.1  | 2 | '12/26 | 3754 |
| 769 | K.AVEHINKTIAPALVSK.K        |                             | 1 | 30.330  | 0.04     | 423.50 | 0.3  | 4 | '8/30  | 4024 |
| 770 | R.KASGPPVSELITK.A           |                             | 2 | 56.120  | 0.00023  | 663.88 | -0.9 | 2 | '9/24  | 4020 |
| 771 | K.STAGDTHLGGEDFDNR.M        |                             | 2 | 44.360  | 0.001    | 564.58 | 1.2  | 3 | '16/30 | 2594 |
| 772 | K.TLFVK.G                   |                             | 1 | 24.230  | 0.16     | 304.19 | 0.0  | 2 | '4/8   | 2712 |
| 773 | K.SVSGTDVQEECR.E            |                             | 1 | 63.620  | 2.5e-005 | 683.80 | 0.0  | 2 | '9/22  | 1334 |
| 774 | K.ITITNDQNR.L               |                             | 1 | 36.430  | 0.041    | 537.78 | -0.2 | 2 | '7/16  | 1494 |
| 775 | K.ERNGLSLAALKK.A            |                             | 2 | 43.420  | 0.0029   | 433.93 | 0.1  | 3 | '7/22  | 4196 |
| 776 | R.AEDGENYDIKK.Q             |                             | 2 | 64.710  | 3.5e-005 | 641.30 | 1.0  | 2 | '9/20  | 1558 |
| 777 | K.IIAPPER.K                 |                             | 3 | 21.970  | 0.3      | 398.24 | 2.5  | 2 | '4/12  | 1849 |
| 778 | R.EPTPVLGSGAAAAGR.S         |                             | 1 | 52.660  | 0.00073  | 677.36 | 0.5  | 2 | '10/28 | 2723 |
| 779 | K.QQYTNQLAK.E               |                             | 1 | 33.130  | 0.068    | 547.29 | 1.0  | 2 | '6/16  | 1647 |
| 780 | K.KSDVEAIFSK.Y              |                             | 3 | 57.870  | 0.00018  | 562.30 | -0.8 | 2 | '7/18  | 3559 |
| 781 | K.SEHPGLSIGDTAK.K           |                             | 1 | 24.520  | 0.5      | 437.89 | 0.2  | 3 | '12/24 | 2790 |
| 782 | K.KSASDLTWDNLKGGK.K         |                             | 2 | 32.210  | 0.12     | 521.61 | -0.3 | 3 | '14/26 | 3540 |
| 783 | R.RAAEEAEEAR.V              |                             | 1 | 25.920  | 0.18     | 566.27 | -9.9 | 2 | '4/18  | 1884 |
| 784 | R.VTQKSYKVSTSGPR.A          |                             | 2 | 35.280  | 0.035    | 513.28 | 1.8  | 3 | '6/26  | 2263 |
| 785 | R.LEALDANSR.K               |                             | 1 | 49.040  | 0.0019   | 494.76 | 0.5  | 2 | '8/16  | 1957 |
| 786 | K.TASEMVLADDNFSTIVAAVEEGR.A | 0.00001000000000000000000.0 | 1 | 34.730  | 0.038    | 814.39 | -2.0 | 3 | '15/44 | 6212 |
| 787 | K.CSTSSLLEACTFR.R           |                             | 4 | 104.860 | 1.7e-009 | 766.35 | -1.6 | 2 | '10/24 | 4084 |
| 788 | R.CLVEKGDVAFVKHQTPVQNTGGK.N |                             | 4 | 22.920  | 0.61     | 628.83 | 0.4  | 4 | '12/44 | 4540 |
| 789 | K.TAENATSGETLEENEAGD.-      |                             | 1 | 124.400 | 7.6e-012 | 919.38 | 0.6  | 2 | '22/34 | 2249 |
| 790 | K.VLAGDKNFITAEELR.R         |                             | 1 | 29.470  | 0.19     | 559.30 | -1.1 | 3 | '14/28 | 4704 |
| 791 | K.HSTIFENLANK.A             |                             | 6 | 64.760  | 6.3e-005 | 637.33 | 2.0  | 2 | '9/20  | 4446 |
| 792 | R.IQLQCQDGSTRT              |                             | 1 | 60.380  | 0.0001   | 653.32 | 2.2  | 2 | '8/20  | 1778 |

|     |                              |  |   |        |          |        |      |   |        |      |
|-----|------------------------------|--|---|--------|----------|--------|------|---|--------|------|
| 793 | R.ENIVIQCEAK.G               |  | 1 | 42.880 | 0.0079   | 602.31 | 0.5  | 2 | '6/18  | 2435 |
| 794 | R.AADPAPEVR.K                |  | 1 | 44.480 | 0.0039   | 463.24 | -1.1 | 2 | '7/16  | 1320 |
| 795 | K.EISDDEAEEEEK.G             |  | 1 | 42.720 | 0.00076  | 647.27 | -2.2 | 2 | '8/20  | 1208 |
| 796 | K.LAADDFR.I                  |  | 1 | 40.680 | 0.015    | 404.20 | 0.2  | 2 | '6/12  | 2407 |
| 797 | K.LGLRQVTGVTR.V              |  | 1 | 27.940 | 0.12     | 400.58 | -0.5 | 3 | '10/20 | 4210 |
| 798 | R.NQGGYGGSSSSSSSYGS<br>GRR.F |  | 2 | 26.390 | 0.11     | 617.61 | 0.4  | 3 | '8/36  | 1769 |
| 799 | K.TLETVPLER.K                |  | 1 | 23.480 | 0.62     | 529.30 | -3.6 | 2 | '9/16  | 3054 |
| 800 | -K.AVSGEAR.F                 |  | 1 | 32.580 | 0.13     | 409.24 | 19.6 | 2 | '6/14  | 3760 |
| 801 | K.VPQVSTPTLVEVSR.N           |  | 1 | 75.230 | 2.9e-006 | 756.42 | -2.3 | 2 | '12/26 | 3896 |
| 802 | K.FLNKLAEER.R                |  | 1 | 23.530 | 0.72     | 373.88 | 0.1  | 3 | '6/16  | 4791 |
| 803 | K.DSYVGDEAQSK.R              |  | 3 | 64.040 | 1.8e-005 | 599.76 | -0.2 | 2 | '9/20  | 1331 |
| 804 | K.FLNKLAEERR.Q               |  | 1 | 31.370 | 0.089    | 319.68 | 0.7  | 4 | '6/18  | 4808 |
| 805 | K.INHCRFDEFFSEGCAPG<br>SKK.D |  | 4 | 37.080 | 0.01     | 597.27 | -3.0 | 4 | '13/38 | 5474 |
| 806 | R.NSILAQVLDQSAR.A            |  | 1 | 80.910 | 1.2e-006 | 707.89 | 1.5  | 2 | '16/24 | 5483 |
| 807 | K.LAADDFR.T                  |  | 1 | 40.680 | 0.015    | 404.20 | 0.2  | 2 | '6/12  | 2407 |
| 808 | K.WSLLQQQK.T                 |  | 1 | 28.690 | 0.25     | 515.79 | -0.9 | 2 | '9/14  | 3847 |
| 809 | K.VQVSYKGETK.A               |  | 2 | 21.910 | 0.82     | 380.21 | 0.4  | 3 | '8/18  | 1640 |
| 810 | R.AEAALIEESR.Q               |  | 1 | 58.590 | 0.00012  | 552.76 | 1.3  | 2 | '7/18  | 1427 |
| 811 | R.VLAALQER.L                 |  | 1 | 34.980 | 0.033    | 450.27 | -4.2 | 2 | '10/14 | 2814 |
| 812 | K.EEASGSSVTAEAK.K            |  | 1 | 70.890 | 5.1e-006 | 697.82 | -1.1 | 2 | '8/26  | 1127 |
| 813 | K.SVEEYANCHLAR.A             |  | 2 | 96.510 | 7.1e-008 | 724.83 | 1.4  | 2 | '9/22  | 2886 |
| 814 | K.DGAGDVAFVK.H               |  | 6 | 62.350 | 9e-005   | 489.75 | -0.2 | 2 | '9/18  | 2873 |
| 815 | R.WAATEQEEGISLK.V            |  | 1 | 79.890 | 1.5e-006 | 731.37 | 0.5  | 2 | '9/24  | 3588 |
| 816 | K.VVSEQKDTLGNTQIKQK.<br>S    |  | 2 | 71.060 | 8e-006   | 639.35 | 0.9  | 3 | '22/32 | 2442 |
| 817 | R.CLVEKGDVAFVK.H             |  | 4 | 64.310 | 8.6e-005 | 455.58 | 0.1  | 3 | '8/22  | 3901 |
| 818 | R.SITNTTVCTK.C               |  | 1 | 50.980 | 0.00092  | 562.78 | -0.4 | 2 | '7/18  | 1503 |
| 819 | K.ATGPPVSELITK.A             |  | 1 | 51.210 | 0.00077  | 606.84 | -1.7 | 2 | '9/22  | 3703 |
| 820 | K.LSKDPNIVIAK.M              |  | 1 | 32.670 | 0.025    | 399.91 | 0.2  | 3 | '11/20 | 2839 |
| 821 | R.ALDFAVGEYNK.A              |  | 1 | 54.760 | 0.0004   | 613.80 | -2.7 | 2 | '9/20  | 4042 |
| 822 | K.VNQIGSVTESLQACK.L          |  | 1 | 97.250 | 3.1e-008 | 817.41 | 0.2  | 2 | '12/28 | 3524 |
| 823 | R.INEILSNALKR.G              |  | 2 | 32.790 | 0.047    | 424.25 | 1.2  | 3 | '5/20  | 4226 |
| 824 | K.ADDTSAATIEK.K              |  | 1 | 40.720 | 0.012    | 561.27 | 2.1  | 2 | '11/20 | 1233 |
| 825 | R.YQEQGGEASPQR.T             |  | 1 | 60.260 | 9.7e-005 | 718.82 | 0.6  | 2 | '7/24  | 1100 |
| 826 | R.FGQGGAGPVGGQGR.<br>G       |  | 1 | 61.870 | 8e-005   | 671.34 | 0.1  | 2 | '8/28  | 2862 |
| 827 | R.LVLDSVKLEA.-               |  | 1 | 53.200 | 0.00062  | 543.82 | -0.2 | 2 | '14/18 | 4583 |
| 828 | R.CKQLEEEQQALQKK.L           |  | 2 | 21.140 | 1.3      | 440.73 | -0.3 | 4 | '16/26 | 2905 |
| 829 | K.VQQLVPK.R                  |  | 1 | 43.330 | 0.0014   | 406.26 | 0.7  | 2 | '5/12  | 1869 |



|     |                           |  |   |        |          |         |      |   |        |      |
|-----|---------------------------|--|---|--------|----------|---------|------|---|--------|------|
| 830 | R.CTGGEVGATSALAPK.I       |  | 1 | 86.730 | 2.8e-007 | 709.85  | 0.0  | 2 | '13/28 | 2454 |
| 831 | R.FSSSSGYGGSSR.V          |  | 1 | 75.480 | 8.2e-007 | 618.27  | 1.8  | 2 | '11/24 | 1371 |
| 832 | R.SVSPCSNVESR.L           |  | 1 | 40.380 | 0.0079   | 611.28  | 2.0  | 2 | '6/20  | 1393 |
| 833 | R.SETKDLLFRDDTVCLAK.L     |  | 8 | 37.470 | 0.025    | 1006.01 | -3.7 | 2 | '7/32  | 4695 |
| 834 | R.VFIGNLNTAIVK.K          |  | 1 | 43.730 | 0.0025   | 644.89  | 0.4  | 2 | '14/22 | 4840 |
| 835 | R.IVSQPQPAR.R             |  | 1 | 40.870 | 0.006    | 498.29  | 1.0  | 2 | '6/16  | 1206 |
| 836 | R.NLPATDPLQR.E            |  | 1 | 26.260 | 0.29     | 562.81  | -0.4 | 2 | '5/18  | 3023 |
| 837 | R.DAEDAVYGR.D             |  | 1 | 49.250 | 0.0014   | 498.23  | 0.4  | 2 | '6/16  | 1838 |
| 838 | K.SCCSCCPVGAKE.C          |  | 1 | 56.930 | 2.9e-006 | 723.26  | 0.6  | 2 | '7/22  | 1336 |
| 839 | K.VGAHAGEYGAELER.M        |  | 2 | 49.940 | 0.00099  | 510.58  | -0.9 | 3 | '9/28  | 3850 |
| 840 | K.IESQTQEEVR.D            |  | 1 | 49.230 | 0.0015   | 609.80  | 0.2  | 2 | '8/18  | 1165 |
| 841 | R.SHAHFFFLTK.E            |  | 1 | 34.980 | 0.048    | 484.24  | 1.2  | 3 | '8/22  | 6077 |
| 842 | K.DLLFKDSAHGFLKVPPR.M     |  | 6 | 24.900 | 0.26     | 485.77  | -1.0 | 4 | '19/32 | 5779 |
| 843 | K.NIYSEELR.E              |  | 1 | 36.490 | 0.025    | 512.26  | -3.3 | 2 | '5/14  | 2927 |
| 844 | R.TISETIER.L              |  | 1 | 50.550 | 0.0017   | 474.75  | 0.1  | 2 | '7/14  | 1943 |
| 845 | K.ADKDYHFKVDNDENEHQLSLR.T |  | 1 | 20.550 | 0.81     | 515.45  | 0.5  | 5 | '22/40 | 4249 |
| 846 | R.SEVTDLRR.T              |  | 1 | 25.070 | 0.58     | 325.85  | 0.1  | 3 | '8/14  | 1824 |
| 847 | R.YQCICYGR.G              |  | 1 | 21.740 | 0.075    | 585.23  | 0.0  | 2 | '7/14  | 2079 |
| 848 | K.ESQSPDTTIQR.T           |  | 1 | 41.250 | 0.007    | 631.30  | -1.7 | 2 | '7/20  | 1276 |
| 849 | K.CETQNPVSAR.R            |  | 1 | 51.690 | 0.00049  | 581.27  | 2.5  | 2 | '9/18  | 1264 |
| 850 | K.AQQELEEQTRR.A           |  | 1 | 36.240 | 0.031    | 463.24  | 1.3  | 3 | '8/20  | 1603 |
| 851 | R.NTKKEGDIAAQR.L          |  | 1 | 39.090 | 0.015    | 505.61  | -0.3 | 3 | '14/26 | 3142 |
| 852 | R.IGAEVYHNLKNVIK.E        |  | 2 | 22.070 | 0.48     | 400.23  | -0.4 | 4 | '17/26 | 5334 |
| 853 | R.YLNFFTK.A               |  | 1 | 29.130 | 0.24     | 466.75  | 0.2  | 2 | '6/12  | 4986 |
| 854 | R.TNNLETGPSTR.L           |  | 1 | 56.350 | 0.00028  | 595.29  | 0.1  | 2 | '6/20  | 1333 |
| 855 | K.CATITPDEAR.V            |  | 1 | 30.950 | 0.051    | 567.26  | -3.4 | 2 | '8/18  | 1665 |
| 856 | K.YGVNPGPIVGTTTR.K        |  | 1 | 43.470 | 0.008    | 665.86  | 0.8  | 2 | '15/24 | 3279 |
| 857 | K.SNVSDAVAQSTR.I          |  | 6 | 92.240 | 9e-008   | 617.80  | 0.4  | 2 | '16/22 | 1895 |
| 858 | R.ALEAANGELEVK.I          |  | 1 | 66.300 | 3.5e-005 | 622.33  | -0.4 | 2 | '8/22  | 2889 |
| 859 | R.CNNVLYIR.G              |  | 1 | 40.800 | 0.012    | 526.27  | 2.0  | 2 | '6/14  | 3322 |
| 860 | K.DCGATWWVLGHSER.R        |  | 4 | 62.530 | 5.2e-005 | 793.87  | 0.8  | 2 | '9/26  | 4246 |
| 861 | R.RIHLELR.N               |  | 2 | 42.380 | 0.0024   | 312.86  | 0.5  | 3 | '6/12  | 4370 |
| 862 | K.AGLVIGKGGETIKQLQER.A    |  | 6 | 50.590 | 0.00042  | 633.03  | -1.7 | 3 | '19/34 | 4882 |
| 863 | R.EGFINYLTR.E             |  | 1 | 31.270 | 0.081    | 556.79  | 4.7  | 2 | '5/16  | 5147 |
| 864 | K.EAGEGGEAEAPAAEGGK.D     |  | 1 | 83.720 | 1.7e-007 | 765.34  | 0.8  | 2 | '25/32 | 1203 |
| 865 | K.TYIPPKGETK.K            |  | 1 | 20.190 | 1.6      | 378.55  | 0.2  | 3 | '10/18 | 1666 |

|     |                               |  |   |        |          |        |      |   |        |      |
|-----|-------------------------------|--|---|--------|----------|--------|------|---|--------|------|
| 866 | K.ALFLETEQLK.K                |  | 1 | 34.880 | 0.071    | 596.34 | 1.9  | 2 | '12/18 | 4609 |
| 867 | K.LEAALGEAKK.Q                |  | 1 | 24.870 | 0.54     | 343.87 | 0.4  | 3 | '9/18  | 2253 |
| 868 | R.VYWKQVAR.N                  |  | 1 | 29.680 | 0.13     | 350.53 | 1.1  | 3 | '9/14  | 3578 |
| 869 | M.PVDFTGYWK.M                 |  | 1 | 33.140 | 0.051    | 556.77 | -0.2 | 2 | '6/16  | 4811 |
| 870 | R.TFNTSTGGLLLPSDTKR.S         |  | 1 | 42.650 | 0.0079   | 603.32 | -2.4 | 3 | '8/32  | 4190 |
| 871 | K.DAFADAVQR.A                 |  | 2 | 59.890 | 0.00013  | 496.74 | 0.9  | 2 | '7/16  | 2730 |
| 872 | R.LLQAETASNSAR.A              |  | 2 | 74.310 | 7.3e-006 | 630.83 | 0.3  | 2 | '10/22 | 1829 |
| 873 | K.CASLQKFGER.A                |  | 2 | 58.320 | 0.0002   | 598.30 | 2.0  | 2 | '8/18  | 2769 |
| 874 | R.AVFPSIVGRPR.H               |  | 9 | 24.990 | 0.28     | 599.86 | -0.5 | 2 | '7/20  | 4559 |
| 875 | K.FINYVKNCFR.M                |  | 2 | 57.590 | 0.00024  | 680.84 | -4.8 | 2 | '7/18  | 4743 |
| 876 | R.TVVAGSSDAAQKAVR.M           |  | 1 | 29.180 | 0.23     | 487.27 | 1.0  | 3 | '12/28 | 2108 |
| 877 | R.LVSLIGSK.T                  |  | 1 | 22.650 | 0.3      | 408.76 | -0.4 | 2 | '6/14  | 3233 |
| 878 | R.TAQEVETYR.R                 |  | 1 | 61.380 | 7.4e-005 | 548.77 | -1.1 | 2 | '8/16  | 1530 |
| 879 | R.ALELEQER.K                  |  | 1 | 27.660 | 0.25     | 494.26 | 1.1  | 2 | '7/14  | 2315 |
| 880 | R.ALINSPEGAVGR.S              |  | 1 | 44.930 | 0.0032   | 592.33 | 0.2  | 2 | '7/22  | 2980 |
| 881 | K.QGGGGGGGSPVPIER.M           |  | 3 | 85.100 | 3.4e-007 | 642.82 | 0.1  | 2 | '12/28 | 2186 |
| 882 | K.TAEAGGVTKGQDQIGSK.A         |  | 1 | 35.900 | 0.046    | 544.94 | -1.0 | 3 | '14/34 | 1988 |
| 883 | R.AVFPSIVGRPR.Q               |  | 6 | 24.990 | 0.28     | 599.86 | -0.5 | 2 | '7/20  | 4559 |
| 884 | R.ELGYVEAK.S                  |  | 1 | 20.380 | 1.1      | 454.74 | 0.4  | 2 | '7/14  | 2169 |
| 885 | R.VNEVNQFAAK.L                |  | 1 | 20.220 | 1.8      | 560.29 | 2.6  | 2 | '8/18  | 2223 |
| 886 | R.INEILSNALK.R                |  | 2 | 36.350 | 0.033    | 557.83 | 0.3  | 2 | '5/18  | 4217 |
| 887 | R.QTVAVGVK.A                  |  | 1 | 44.870 | 0.0036   | 457.79 | 0.0  | 2 | '8/16  | 2571 |
| 888 | K.ILGATIENSR.I                |  | 1 | 57.900 | 0.0003   | 537.30 | -1.4 | 2 | '9/18  | 2850 |
| 889 | R.RHVFGESDELIGQK.V            |  | 6 | 73.990 | 1e-005   | 538.95 | 0.3  | 3 | '10/26 | 4431 |
| 890 | R.TGGTQTDLFTCGK.C             |  | 1 | 86.600 | 1.5e-007 | 693.32 | -0.2 | 2 | '9/24  | 2936 |
| 891 | R.IQELEDLLAK.E                |  | 1 | 40.320 | 0.015    | 586.33 | -3.2 | 2 | '8/18  | 4860 |
| 892 | K.KITISDCGQL.-                |  | 1 | 28.190 | 0.27     | 567.79 | -1.4 | 2 | '6/18  | 3379 |
| 893 | K.ELALGQDR.I                  |  | 1 | 27.890 | 0.24     | 451.24 | -0.3 | 2 | '6/14  | 2257 |
| 894 | K.ALFLETEQLKK.L               |  | 1 | 20.610 | 0.84     | 440.59 | 0.2  | 3 | '9/20  | 4424 |
| 895 | R.KAALKTASDFITK.M             |  | 4 | 38.950 | 0.0076   | 465.27 | 0.3  | 3 | '8/24  | 4473 |
| 896 | R.AVEVLPK.A                   |  | 2 | 34.130 | 0.021    | 378.24 | -0.3 | 2 | '4/12  | 2164 |
| 897 | K.YICENQDSISSK.L              |  | 1 | 21.830 | 0.31     | 722.32 | -0.1 | 2 | '12/22 | 1923 |
| 898 | K.GDVAFVKHQTVPQNTGKKNPDPWAK.N |  | 4 | 23.600 | 0.6      | 673.60 | -0.7 | 4 | '19/48 | 4463 |
| 899 | R.LAAEQELIR.L                 |  | 1 | 55.600 | 0.00039  | 521.80 | -1.7 | 2 | '8/16  | 3070 |
| 900 | R.NFWVSGLSSTTR.A              |  | 1 | 40.510 | 0.013    | 677.84 | 2.1  | 2 | '7/22  | 4828 |
| 901 | K.LSELEAALQR.A                |  | 1 | 59.250 | 0.00022  | 565.31 | 0.1  | 2 | '7/18  | 3875 |
| 902 | K.STESLQANVQR.L               |  | 1 | 70.840 | 1.3e-005 | 616.81 | -1.5 | 2 | '8/20  | 1688 |

|     |                                |  |   |             |          |        |      |   |        |      |
|-----|--------------------------------|--|---|-------------|----------|--------|------|---|--------|------|
| 903 | R.QCLPCGPGGKGR.C               |  | 2 | 35.680      | 0.032    | 429.54 | 0.5  | 3 | '13/22 | 2516 |
| 904 | R.SSTETCYSAIPK.A               |  | 1 | 54.170      | 0.00021  | 672.31 | -0.4 | 2 | '9/22  | 2303 |
| 905 | R.QTVAVGVIK.N                  |  | 1 | 44.870      | 0.0036   | 457.79 | 0.0  | 2 | '8/16  | 2571 |
| 906 | R.RGDLPFVPR.R                  |  | 4 | 40.970      | 0.0075   | 385.89 | 0.1  | 3 | '6/18  | 4857 |
| 907 | K.SLLELAR.M                    |  | 1 | 46.390      | 0.0044   | 401.25 | 1.1  | 2 | '6/12  | 4019 |
| 908 | R.DLESLR.E                     |  | 1 | 21.220      | 1.8      | 366.70 | 1.2  | 2 | '5/10  | 2444 |
| 909 | R.ASLEAAIADAEQR.G              |  | 2 | 76.800      | 2.8e-006 | 672.84 | 2.1  | 2 | '9/24  | 4253 |
| 910 | R.LVEVDSGR.Q                   |  | 1 | 25.170      | 1        | 437.74 | 0.3  | 2 | '6/14  | 1521 |
| 911 | R.KPLVIAEDVDGEALSTL<br>VLNR.L  |  | 2 | 40.160      | 0.0035   | 789.12 | 0.0  | 3 | '7/42  | 6724 |
| 912 | R.GFGFILFK.D                   |  | 1 | 26.490      | 0.32     | 464.77 | 0.0  | 2 | '5/14  | 6175 |
| 913 | R.SQEVEVLER.G                  |  | 1 | 55.960      | 0.00029  | 559.28 | -3.6 | 2 | '6/16  | 1822 |
| 914 | R.IGGGIDVPVPR.H                |  | 2 | 62.560      | 4.1e-005 | 540.32 | 2.1  | 2 | '10/20 | 3725 |
| 915 | K.EFQLFSSPHGK.D                |  | 2 | 29.920      | 0.16     | 426.22 | 0.4  | 3 | '6/20  | 4362 |
| 916 | R.VRFATHAAALSVR.N              |  | 1 | 35.860      | 0.027    | 350.45 | -1.2 | 4 | '11/24 | 4673 |
| 917 | R.TTPSVVAFTADGER.L             |  | 1 | 77.030      | 3.2e-006 | 725.86 | 1.4  | 2 | '9/26  | 3644 |
| 918 | K.ASLHQSSESR.R                 |  | 2 | 58.170      | 0.00016  | 621.81 | -0.2 | 2 | '7/20  | 2318 |
| 919 | R.SLDNFFAKR.D                  |  | 1 | 22.340      | 0.67     | 366.53 | 0.4  | 3 | '8/16  | 4456 |
| 920 | K.TGVTSTSDSEEEGDDQE<br>GEKKR.K |  | 1 | 57.580      | 6.7e-005 | 596.76 | -2.1 | 4 | '11/42 | 1578 |
| 921 | K.YEELQSLAGKHGDDL.R<br>R       |  | 1 | 32.010      | 0.088    | 458.48 | -1.3 | 4 | '7/30  | 3915 |
| 922 | R.GLQATQLAR.S                  |  | 1 | 43.840      | 0.0057   | 479.28 | -0.3 | 2 | '6/16  | 2280 |
| 923 | R.LIDLHSPSEIVK.Q               |  | 1 | 25.920      | 0.23     | 450.93 | 0.2  | 3 | '10/22 | 4041 |
| 924 | K.VLTPTQVK.N                   |  | 1 | 29.990      | 0.1      | 443.27 | 0.3  | 2 | '6/14  | 1986 |
| 925 | R.FLEQQNQVLQTK.W               |  | 2 | 62.170      | 0.00013  | 738.40 | 0.3  | 2 | '8/22  | 3236 |
| 926 | K.CGLVPVLAENYK.S               |  | 1 | 36.310      | 0.045    | 681.86 | -3.9 | 2 | '13/22 | 4759 |
| 927 | R.VTEDSEEEEEEEER.E             |  | 1 | 115.19<br>0 | 1.4e-011 | 934.36 | -0.5 | 2 | '12/28 | 1497 |
| 928 | K.SASDLTWDNLKGGK.S             |  | 6 | 54.910      | 0.00066  | 781.91 | 0.1  | 2 | '11/26 | 3571 |
| 929 | R.LAKLSDGVAVLK.V               |  | 1 | 31.460      | 0.042    | 405.25 | -1.0 | 3 | '9/22  | 4091 |
| 930 | R.SGAQASSTPLSPTR.I             |  | 1 | 59.020      | 0.00021  | 680.35 | 0.7  | 2 | '7/26  | 1771 |
| 931 | K.AEDGATSPSPNETPK.K            |  | 1 | 33.910      | 0.025    | 750.85 | 2.0  | 2 | '6/28  | 1267 |
| 932 | K.KQELEEICHDLER.V              |  | 1 | 20.950      | 0.98     | 590.62 | 2.3  | 3 | '15/26 | 4839 |
| 933 | R.TTPSYVAFTDTER.L              |  | 6 | 62.000      | 5.7e-005 | 744.35 | -0.3 | 2 | '8/24  | 3582 |
| 934 | K.TLDFDALSVMQR.G               |  | 1 | 63.460      | 7.5e-005 | 661.34 | 1.4  | 2 | '7/22  | 4749 |
| 935 | K.VAVTEGCQPSR.V                |  | 1 | 50.290      | 0.001    | 602.29 | -0.5 | 2 | '8/20  | 1345 |
| 936 | R.RALDFAVGEYNK.A               |  | 1 | 26.990      | 0.31     | 461.57 | -0.5 | 3 | '8/22  | 4123 |
| 937 | K.EVFEDAAEIR.L                 |  | 1 | 55.960      | 0.00031  | 589.79 | -1.0 | 2 | '8/18  | 3475 |
| 938 | R.KGSHGLEIFQR.C                |  | 1 | 42.870      | 0.0082   | 424.57 | 0.2  | 3 | '11/20 | 5093 |

|     |                                |  |   |             |          |        |      |   |        |      |
|-----|--------------------------------|--|---|-------------|----------|--------|------|---|--------|------|
| 939 | R.SSGSPYGGGYGSGGG<br>SGGYGSR.R |  | 1 | 121.58<br>0 | 9.5e-012 | 955.90 | -1.0 | 2 | '16/42 | 2400 |
| 940 | K.KSDVEAIFSKYGK.I              |  | 3 | 40.270      | 0.013    | 491.27 | 1.8  | 3 | '12/24 | 4412 |
| 941 | K.IFVGGLSPDTPEEK.I             |  | 1 | 72.210      | 1e-005   | 744.88 | 1.1  | 2 | '11/26 | 3876 |
| 942 | R.TKLDELKR.Q                   |  | 1 | 32.570      | 0.063    | 334.87 | -1.4 | 3 | '5/14  | 2780 |
| 943 | R.QLYEEEIR.E                   |  | 1 | 45.460      | 0.0039   | 540.27 | -0.4 | 2 | '6/14  | 2753 |
| 944 | R.VVIIGAGKPAAVLQTK.<br>G       |  | 1 | 53.990      | 2.1e-005 | 555.35 | -1.4 | 3 | '18/32 | 4851 |
| 945 | R.LEQEIATYR.R                  |  | 4 | 56.310      | 0.00045  | 561.79 | -0.5 | 2 | '6/16  | 2507 |
| 946 | R.LEQEIATYR.S                  |  | 4 | 56.310      | 0.00045  | 561.79 | -0.5 | 2 | '6/16  | 2507 |
| 947 | R.FGIVTSSAGTGTTEDEA<br>K.K     |  | 1 | 56.140      | 0.00023  | 936.44 | -5.5 | 2 | '11/36 | 3094 |
| 948 | R.LQTSSVLVSGLR.G               |  | 1 | 70.500      | 1e-005   | 630.37 | -5.9 | 2 | '8/22  | 3953 |
| 949 | R.AELSEGQVR.Q                  |  | 4 | 54.130      | 0.00058  | 494.76 | 1.2  | 2 | '8/16  | 1493 |
| 950 | R.SYSCQVTHEGSTVEK.T            |  | 1 | 21.260      | 0.41     | 571.26 | 0.2  | 3 | '14/28 | 2016 |
| 951 | K.TFDQLTPEESKER.L              |  | 1 | 22.560      | 0.79     | 527.26 | -1.8 | 3 | '13/24 | 2844 |
| 952 | K.AIEENNNFSK.M                 |  | 1 | 39.390      | 0.012    | 583.28 | 0.9  | 2 | '5/18  | 1610 |
| 953 | K.YIDQEELNK.T                  |  | 2 | 44.540      | 0.0063   | 576.28 | 0.1  | 2 | '7/16  | 2119 |
| 954 | R.SSAVDPEPQVK.L                |  | 1 | 40.950      | 0.0091   | 578.80 | 0.0  | 2 | '13/20 | 1626 |
| 955 | K.WQNSYSIK.V                   |  | 1 | 22.500      | 0.59     | 513.26 | -0.4 | 2 | '5/14  | 2718 |
| 956 | R.AGGPTTPLSPTR.L               |  | 1 | 35.870      | 0.047    | 577.81 | 1.6  | 2 | '6/22  | 2181 |
| 957 | R.ASGQAFELILSPR.S              |  | 2 | 74.110      | 6e-006   | 694.88 | 2.0  | 2 | '8/24  | 5214 |
| 958 | K.LEATINELV.-                  |  | 1 | 55.870      | 0.00047  | 501.28 | -0.3 | 2 | '7/16  | 5106 |
| 959 | K.EESDDEAAVEEEEEKK<br>PK.T     |  | 1 | 21.720      | 0.22     | 555.75 | -0.9 | 4 | '11/36 | 1998 |
| 960 | R.QRAELEELR.Q                  |  | 1 | 19.520      | 3.1      | 381.88 | -0.2 | 3 | '7/16  | 2982 |
| 961 | R.LADALQELR.A                  |  | 1 | 76.630      | 2.6e-006 | 514.79 | -0.4 | 2 | '8/16  | 3802 |
| 962 | K.VLQATVVAVGSGSK.G             |  | 1 | 118.81<br>0 | 1.4e-010 | 658.38 | 0.1  | 2 | '12/26 | 3010 |
| 963 | R.QAGLSYIR.Y                   |  | 1 | 38.740      | 0.018    | 454.25 | -0.1 | 2 | '7/14  | 2833 |
| 964 | R.LEEPEEPK.V                   |  | 1 | 25.210      | 0.23     | 485.74 | 0.4  | 2 | '6/14  | 1495 |
| 965 | R.DAVTYTEHAK.C                 |  | 2 | 43.300      | 0.0056   | 567.78 | 0.3  | 2 | '11/18 | 1596 |
| 966 | K.LAEIGAPIQGNR.E               |  | 1 | 66.060      | 2.3e-005 | 619.85 | -0.1 | 2 | '9/22  | 3036 |
| 967 | R.NSNLVGAAHEELQQSR.I           |  | 2 | 86.240      | 3.8e-007 | 876.94 | 1.1  | 2 | '13/30 | 3711 |
| 968 | R.ELVLDNCK.S                   |  | 1 | 31.730      | 0.097    | 495.75 | 1.4  | 2 | '6/14  | 2374 |
| 969 | K.YVECSALTQK.G                 |  | 1 | 40.830      | 0.0075   | 599.79 | 0.0  | 2 | '7/18  | 2111 |
| 970 | R.LQAEIEGLKGQR.A               |  | 1 | 22.490      | 0.85     | 447.92 | 0.6  | 3 | '11/22 | 3020 |
| 971 | K.ALDLDSSCKEADGYQR<br>.C       |  | 1 | 46.590      | 0.0014   | 633.62 | -0.6 | 3 | '14/32 | 2988 |
| 972 | R.IQEAGTEVVKAK.A               |  | 1 | 47.820      | 0.0021   | 424.91 | 1.3  | 3 | '9/22  | 1999 |
| 973 | K.IAEVDCTAER.N                 |  | 1 | 54.030      | 0.00028  | 582.27 | 0.1  | 2 | '9/18  | 1601 |

|      |                                   |                                   |   |        |          |        |      |   |        |      |
|------|-----------------------------------|-----------------------------------|---|--------|----------|--------|------|---|--------|------|
| 974  | K.EAAGKSSGPTSLFAVTV<br>APPGAR.Q   |                                   | 1 | 25.840 | 0.31     | 724.39 | -1.2 | 3 | '10/44 | 4866 |
| 975  | R.LLLPGELAK.H                     |                                   | 6 | 39.570 | 0.002    | 477.31 | 0.1  | 2 | '7/16  | 4361 |
| 976  | K.LQQENSILR.N                     |                                   | 1 | 42.020 | 0.012    | 550.81 | -0.2 | 2 | '7/16  | 2544 |
| 977  | K.LLSDKLKE                        |                                   | 2 | 25.360 | 0.16     | 408.76 | 0.5  | 2 | '5/12  | 2543 |
| 978  | K.WAEQYLK.I                       |                                   | 1 | 28.220 | 0.18     | 469.24 | 2.0  | 2 | '6/12  | 3401 |
| 979  | K.VGVNGFGR.I                      |                                   | 1 | 46.910 | 0.0034   | 403.22 | -0.5 | 2 | '6/14  | 2449 |
| 980  | R.YQKSTELLIR.K                    |                                   | 2 | 32.980 | 0.048    | 417.57 | -0.2 | 3 | '8/18  | 3530 |
| 981  | R.QLLLADDR.V                      |                                   | 1 | 55.780 | 0.00045  | 522.79 | -1.5 | 2 | '8/16  | 3342 |
| 982  | K.DLAGSIIGK.G                     |                                   | 1 | 20.920 | 2        | 437.26 | -1.3 | 2 | '5/16  | 3824 |
| 983  | K.AVNEKSCNCLLLK.V                 |                                   | 1 | 23.650 | 0.79     | 516.93 | -0.9 | 3 | '12/24 | 3364 |
| 984  | R.LSQETEALGR.S                    |                                   | 1 | 56.790 | 0.00037  | 552.29 | -3.4 | 2 | '7/18  | 1894 |
| 985  | R.AIMTYVSCFYHAFAGAE<br>QAETAANR.I | 0.00100000000000000000<br>00000.0 | 1 | 32.740 | 0.035    | 932.42 | 0.1  | 3 | '25/48 | 6215 |
| 986  | K.EVTEEEAER.F                     |                                   | 1 | 31.820 | 0.044    | 546.25 | -0.4 | 2 | '5/16  | 1310 |
| 987  | R.SDGSCAWYR.G                     |                                   | 2 | 47.210 | 0.00026  | 551.23 | 0.8  | 2 | '8/16  | 2696 |
| 988  | R.DASTLQSQAEGTGDAK<br>-           |                                   | 1 | 27.760 | 0.21     | 569.61 | 0.9  | 3 | '13/32 | 1317 |
| 989  | R.LEPKPQPVAEATPR.S                |                                   | 1 | 43.110 | 0.0087   | 543.97 | 0.1  | 3 | '7/28  | 2757 |
| 990  | R.VIGSGCNLDSAR.F                  |                                   | 3 | 53.180 | 0.00057  | 624.80 | 0.6  | 2 | '9/22  | 2264 |
| 991  | R.GLETSLAECTFTK.R                 |                                   | 1 | 90.720 | 8.1e-008 | 728.85 | -4.1 | 2 | '9/24  | 4103 |
| 992  | R.INISEGNCPER.I                   |                                   | 2 | 51.920 | 0.00042  | 644.80 | 0.2  | 2 | '8/20  | 2012 |
| 993  | K.CSTSIANQAVR.I                   |                                   | 2 | 29.260 | 0.16     | 603.80 | 0.8  | 2 | '8/20  | 1767 |
| 994  | K.ADDLGKGGNEESTKTGN<br>AGSR.L     |                                   | 2 | 60.980 | 6.8e-005 | 688.66 | -0.4 | 3 | '21/40 | 1694 |
| 995  | K.DTLGNTQIKQK.S                   |                                   | 1 | 21.750 | 1.2      | 623.34 | -5.5 | 2 | '8/20  | 1731 |
| 996  | K.NQLTSNPENTVFDAGR.L              |                                   | 1 | 32.660 | 0.082    | 611.97 | -0.7 | 3 | '14/30 | 3391 |
| 997  | K.ELESQVSGLEK.E                   |                                   | 1 | 25.180 | 0.55     | 609.82 | 13.1 | 2 | '8/20  | 2682 |
| 998  | R.TIGISVDPR.R                     |                                   | 1 | 48.750 | 0.0016   | 479.27 | -0.1 | 2 | '7/16  | 3086 |
| 999  | R.SLLEGQEDHYNNLSASK<br>.V         |                                   | 1 | 30.160 | 0.22     | 635.64 | -0.2 | 3 | '21/32 | 3705 |
| 1000 | R.AEIQIR.I                        |                                   | 1 | 33.450 | 0.089    | 365.22 | -1.5 | 2 | '5/10  | 1874 |
| 1001 | K.TCVADESAENCDK.S                 |                                   | 1 | 50.390 | 2.9e-005 | 749.79 | 1.2  | 2 | '9/24  | 1133 |
| 1002 | R.VFTAGSEER.V                     |                                   | 1 | 47.520 | 0.0017   | 498.24 | -0.2 | 2 | '7/16  | 1675 |
| 1003 | R.ALQASALK.A                      |                                   | 1 | 21.870 | 1.2      | 401.24 | -2.1 | 2 | '5/14  | 1881 |
| 1004 | R.LASYLDK.V                       |                                   | 4 | 22.020 | 0.64     | 405.22 | 2.0  | 2 | '5/12  | 2293 |
| 1005 | R.VAQLEQVYIR.G                    |                                   | 1 | 68.490 | 2.1e-005 | 609.85 | -0.5 | 2 | '9/18  | 3686 |
| 1006 | R.VFIGNLNTLVVKK.S                 |                                   | 3 | 20.910 | 0.12     | 482.30 | 0.0  | 3 | '11/24 | 4895 |
| 1007 | R.YYCFQGNQFLR.F                   |                                   | 1 | 45.390 | 0.0021   | 748.34 | -0.5 | 2 | '13/20 | 4703 |
| 1008 | K.AEPVEVVAPR.G                    |                                   | 1 | 54.300 | 0.00038  | 533.80 | 0.3  | 2 | '7/18  | 2512 |
| 1009 | R.VVVLGLLPR.G                     |                                   | 1 | 59.120 | 2e-006   | 483.33 | -0.6 | 2 | '7/16  | 5220 |

|      |                              |                  |    |        |          |        |       |   |        |      |
|------|------------------------------|------------------|----|--------|----------|--------|-------|---|--------|------|
| 1010 | K.TVTAMDVVYALK.R             | 0.000010000000.0 | 1  | 48.540 | 0.0018   | 663.85 | -0.8  | 2 | '9/22  | 4520 |
| 1011 | K.RKASGPPVSELITK.A           |                  | 2  | 54.970 | 0.00018  | 494.96 | -0.5  | 3 | '22/26 | 5073 |
| 1012 | K.QAEILQESR.M                |                  | 1  | 27.400 | 0.29     | 537.28 | -3.4  | 2 | '6/16  | 2151 |
| 1013 | R.QITVNDLPVGR.S              |                  | 2  | 45.930 | 0.0028   | 606.34 | 1.7   | 2 | '9/20  | 3671 |
| 1014 | K.NAGAVIGKGGKNIK.A           |                  | 1  | 33.100 | 0.034    | 442.93 | -0.3  | 3 | '12/26 | 2998 |
| 1015 | R.SGLLEVLVR.D                |                  | 1  | 40.910 | 0.0084   | 493.31 | 0.5   | 2 | '5/16  | 5578 |
| 1016 | K.ESYSVYVYK.V                |                  | 2  | 23.640 | 0.52     | 569.27 | -3.3  | 2 | '6/16  | 3165 |
| 1017 | R.FLQDYFDGNLKR.Y             |                  | 2  | 29.740 | 0.15     | 505.92 | -2.8  | 3 | '12/22 | 4999 |
| 1018 | R.IALDFQR.G                  |                  | 1  | 26.050 | 0.44     | 431.74 | -0.3  | 2 | '4/12  | 3606 |
| 1019 | K.VAVNDAHLLQYNHR.V           |                  | 1  | 26.380 | 0.4      | 413.22 | 0.1   | 4 | '12/26 | 3814 |
| 1020 | R.VLIAAHGNSLR.G              |                  | 1  | 20.700 | 0.68     | 384.23 | 0.3   | 3 | '7/20  | 3352 |
| 1021 | K.ASAAFSSVSGSVITKK.L         |                  | 1  | 20.040 | 0.97     | 484.94 | -0.6  | 3 | '10/28 | 3694 |
| 1022 | K.STGGAPT FNVTVTKDK.<br>T    |                  | 2  | 86.620 | 5.3e-007 | 862.45 | 0.6   | 2 | '12/32 | 2910 |
| 1023 | R.KLVILEGELER.A              |                  | 4  | 37.090 | 0.015    | 433.59 | 0.2   | 3 | '9/20  | 5009 |
| 1024 | R.LFQVR.A                    |                  | 2  | 25.600 | 0.28     | 331.70 | 0.3   | 2 | '4/8   | 2761 |
| 1025 | K.DLLFRDDTVCLAK.L            |                  | 6  | 69.780 | 4e-005   | 783.40 | -0.4  | 2 | '11/24 | 4917 |
| 1026 | R.VLNTNIDGR.R                |                  | 1  | 51.350 | 0.0013   | 501.27 | 1.3   | 2 | '7/16  | 2101 |
| 1027 | R.CGETHVAINCSK.T             |                  | 1  | 37.630 | 0.0053   | 478.21 | -1.0  | 3 | '12/24 | 2120 |
| 1028 | R.AIEASNAYS.R.I              |                  | 1  | 62.230 | 5.1e-005 | 541.26 | -13.6 | 2 | '7/18  | 1559 |
| 1029 | R.IQLVEEELDR.A               |                  | 15 | 62.480 | 8.1e-005 | 622.33 | 0.2   | 2 | '8/18  | 3934 |
| 1030 | R.DSAQTSVTQAQR.E             |                  | 2  | 71.390 | 8.4e-006 | 646.32 | 0.9   | 2 | '10/22 | 1082 |
| 1031 | R.ALELENDR.L                 |                  | 1  | 32.160 | 0.071    | 480.24 | -1.1  | 2 | '6/14  | 2168 |
| 1032 | R.EADVDQDGRVNYEELAR.<br>.M   |                  | 1  | 38.210 | 0.0068   | 671.64 | -0.7  | 3 | '14/32 | 3491 |
| 1033 | K.AEAESLYQSK.Y               |                  | 1  | 66.540 | 2.1e-005 | 563.27 | -1.8  | 2 | '10/18 | 1795 |
| 1034 | K.EGVVECSFK.S                |                  | 1  | 27.620 | 0.21     | 577.28 | 0.4   | 2 | '6/18  | 3177 |
| 1035 | R.SLETENAGLRLR.I             |                  | 1  | 35.660 | 0.044    | 453.58 | -0.1  | 3 | '6/22  | 3562 |
| 1036 | K.NLPYKVTQDELK.E             |                  | 2  | 49.900 | 0.0018   | 724.39 | -0.5  | 2 | '7/22  | 3853 |
| 1037 | R.SGTDVDAANLR.E              |                  | 1  | 76.350 | 3e-006   | 559.78 | -0.4  | 2 | '9/20  | 1967 |
| 1038 | R.VFSGLVSTGLKVR.I            |                  | 1  | 20.020 | 0.41     | 454.94 | 0.1   | 3 | '8/24  | 4880 |
| 1039 | R.YLAADKDGNTCER.E            |                  | 1  | 31.520 | 0.058    | 537.92 | 0.4   | 3 | '15/26 | 2469 |
| 1040 | K.LTVDSAIAR.D                |                  | 1  | 34.920 | 0.064    | 473.27 | -3.5  | 2 | '8/16  | 2689 |
| 1041 | K.LLSISGKR.S                 |                  | 2  | 30.170 | 0.069    | 437.28 | 0.7   | 2 | '4/14  | 2911 |
| 1042 | K.VIADNVKDWSK.V              |                  | 3  | 19.830 | 2        | 425.56 | 0.4   | 3 | '10/20 | 3195 |
| 1043 | K.SDNCEDTPEAGYFAVAV<br>VKK.S |                  | 2  | 59.060 | 0.00011  | 734.01 | 2.6   | 3 | '20/38 | 4311 |
| 1044 | R.QGANINEIR.Q                |                  | 1  | 57.420 | 0.00023  | 507.77 | -0.5  | 2 | '8/16  | 2057 |
| 1045 | R.KLVILEGELER.S              |                  | 4  | 37.090 | 0.015    | 433.59 | 0.2   | 3 | '9/20  | 5009 |
| 1046 | K.DLSLEEIQKK.L               |                  | 4  | 47.710 | 0.0027   | 601.84 | 1.1   | 2 | '7/18  | 3153 |

|      |                             |                    |   |             |          |        |       |   |        |      |
|------|-----------------------------|--------------------|---|-------------|----------|--------|-------|---|--------|------|
| 1047 | K.LTMQNLNDR.L               | 0.001000000.0      | 1 | 34.940      | 0.043    | 560.77 | -0.5  | 2 | '8/16  | 1450 |
| 1048 | R.LDIDSPITAR.N              |                    | 1 | 50.150      | 0.0012   | 599.33 | -0.9  | 2 | '10/20 | 3585 |
| 1049 | R.IEDVTPIPSDSTRR.K          |                    | 1 | 22.190      | 0.84     | 529.28 | -2.8  | 3 | '16/26 | 2676 |
| 1050 | R.TVIEQSWGSPK.V             |                    | 1 | 59.410      | 0.00018  | 672.86 | -0.8  | 2 | '10/22 | 3762 |
| 1051 | R.RAPQTGIVDECCFR.S          |                    | 1 | 35.990      | 0.021    | 570.27 | 0.8   | 3 | '9/26  | 3610 |
| 1052 | K.LIELQAGKK.S               |                    | 1 | 24.200      | 0.36     | 333.88 | -1.8  | 3 | '5/16  | 2733 |
| 1053 | R.LVSSDPEINTK.K             |                    | 1 | 39.060      | 0.02     | 601.82 | 0.7   | 2 | '8/20  | 1939 |
| 1054 | R.LSKEEIER.M                |                    | 2 | 28.960      | 0.24     | 335.19 | 0.5   | 3 | '6/14  | 1684 |
| 1055 | R.NQGGYGGSSSSSSSYGS<br>GR.R |                    | 2 | 114.04<br>0 | 6.2e-011 | 847.85 | -0.1  | 2 | '15/34 | 1332 |
| 1056 | K.DQVANSAFVER.L             |                    | 1 | 66.680      | 2.7e-005 | 618.30 | -0.1  | 2 | '8/20  | 2563 |
| 1057 | R.LSSEMNTSTVNSAR.E          | 0.00001000000000.0 | 1 | 59.510      | 8.5e-005 | 756.85 | 0.3   | 2 | '8/26  | 1216 |
| 1058 | R.LGTTSPVYGGAGGR.G          |                    | 1 | 46.110      | 0.0046   | 646.83 | -0.1  | 2 | '8/26  | 2498 |
| 1059 | R.DSVLTSKNQIER.L            |                    | 1 | 35.010      | 0.053    | 463.92 | -1.7  | 3 | '12/22 | 2323 |
| 1060 | R.SPHSGMTTPMSR.G            | 0.000001000100.0   | 1 | 32.620      | 0.027    | 660.79 | 9.8   | 2 | '6/22  | 2452 |
| 1061 | K.KLEENEVIPK.R              |                    | 1 | 40.490      | 0.011    | 599.84 | -0.4  | 2 | '6/18  | 2878 |
| 1062 | R.ITESEEVVSR.E              |                    | 1 | 83.050      | 7.9e-007 | 574.79 | 0.4   | 2 | '8/18  | 1703 |
| 1063 | K.SLVSKGTLVQTK.G            |                    | 6 | 53.570      | 0.0002   | 630.88 | -1.6  | 2 | '8/22  | 3131 |
| 1064 | K.KTIERR.Y                  |                    | 1 | 23.970      | 0.9      | 401.74 | -15.2 | 2 | '4/10  | 3563 |
| 1065 | R.VLQSFTVDSSK.A             |                    | 1 | 54.350      | 0.0006   | 605.82 | 0.4   | 2 | '8/20  | 3001 |
| 1066 | R.VGLKAPGIIPR.I             |                    | 2 | 47.200      | 0.00011  | 374.25 | 0.9   | 3 | '11/20 | 4341 |
| 1067 | K.QGCDCECLGGGR.T            |                    | 1 | 85.730      | 4.4e-009 | 684.76 | -0.5  | 2 | '10/22 | 1504 |
| 1068 | K.STGGAPTFNVTVK.T           |                    | 1 | 71.390      | 1.2e-005 | 690.36 | 0.9   | 2 | '10/26 | 3164 |
| 1069 | R.NTGIICTIGPASR.S           |                    | 1 | 61.230      | 0.00014  | 680.36 | -0.2  | 2 | '7/24  | 3532 |
| 1070 | R.HLQLAIRNDEELNK.L          |                    | 1 | 23.060      | 0.66     | 564.97 | -1.0  | 3 | '14/26 | 4441 |
| 1071 | R.SGGYGGSRDYSSR.S           |                    | 2 | 37.130      | 0.0071   | 504.56 | 0.5   | 3 | '9/26  | 2378 |
| 1072 | R.FATHAAALSVR.N             |                    | 1 | 43.760      | 0.013    | 381.88 | -0.3  | 3 | '8/20  | 3542 |
| 1073 | K.KAQQELEEQTRR.A            |                    | 1 | 21.560      | 1.2      | 505.93 | 0.3   | 3 | '9/22  | 2178 |
| 1074 | K.CCTESLVNR.R               |                    | 1 | 49.100      | 0.00052  | 569.75 | 0.7   | 2 | '8/16  | 1873 |
| 1075 | R.AGRGFSLEELR.V             |                    | 1 | 29.580      | 0.19     | 412.22 | 0.7   | 3 | '12/20 | 4510 |
| 1076 | R.GFFYTPK.T                 |                    | 2 | 26.920      | 0.27     | 430.22 | 0.0   | 2 | '5/12  | 3945 |
| 1077 | R.GALQNIIPASTGAAK.A         |                    | 1 | 42.940      | 0.0055   | 706.40 | 0.9   | 2 | '9/28  | 3939 |
| 1078 | R.IGCIITAR.K                |                    | 1 | 48.470      | 0.0027   | 452.26 | -0.7  | 2 | '7/14  | 2945 |
| 1079 | R.VGLKAPGIIPR.T             |                    | 1 | 47.200      | 0.00011  | 374.25 | 0.9   | 3 | '11/20 | 4341 |
| 1080 | R.NYQQNYQNSSEGEK.N          |                    | 1 | 57.740      | 3.7e-005 | 844.86 | -0.4  | 2 | '9/26  | 1346 |
| 1081 | R.KIQVLQQQADDAEER.A         |                    | 3 | 57.290      | 0.00031  | 590.97 | 0.1   | 3 | '16/28 | 3186 |
| 1082 | R.AVVIVDDRGR.S              |                    | 1 | 28.290      | 0.19     | 367.21 | -0.2  | 3 | '5/18  | 2270 |
| 1083 | R.CESQSTLDPGAGEAR.A         |                    | 1 | 78.790      | 4.2e-007 | 789.35 | 0.2   | 2 | '12/28 | 1851 |
| 1084 | R.EAGEQGDIEPR.R             |                    | 1 | 69.770      | 1.4e-005 | 600.78 | 0.4   | 2 | '10/20 | 1433 |
| 1085 | R.TVIDYNGER.T               |                    | 2 | 52.560      | 0.00068  | 533.76 | -1.9  | 2 | '13/16 | 2171 |



|      |                              |              |   |        |          |        |      |   |        |      |
|------|------------------------------|--------------|---|--------|----------|--------|------|---|--------|------|
| 1086 | K.LYEQLSGK.-                 |              | 1 | 41.960 | 0.0076   | 469.25 | -0.3 | 2 | '7/14  | 2195 |
| 1087 | K.ALAAAGYDVEKNSR.I           |              | 4 | 79.390 | 1.9e-006 | 789.90 | 3.2  | 2 | '11/28 | 2608 |
| 1088 | R.GYSFTTTAER.E               |              | 2 | 46.970 | 0.0014   | 566.76 | -6.5 | 2 | '8/18  | 2564 |
| 1089 | K.FEDENFILK.H                |              | 2 | 50.780 | 0.0011   | 577.79 | -0.6 | 2 | '13/16 | 4406 |
| 1090 | K.DSAHGFLKVPFR.M             |              | 6 | 30.990 | 0.098    | 441.91 | -0.2 | 3 | '7/22  | 3761 |
| 1091 | K.AADIDQEVKER.A              |              | 1 | 29.080 | 0.19     | 425.22 | 2.4  | 3 | '5/20  | 1897 |
| 1092 | R.EESREPAPASPAPAGVE<br>IR.S  |              | 1 | 40.750 | 0.013    | 655.00 | 2.5  | 3 | '26/36 | 2801 |
| 1093 | R.LASYLDR.V                  |              | 2 | 27.760 | 0.2      | 419.23 | -0.2 | 2 | '5/12  | 2515 |
| 1094 | R.AMSDLELR.Q                 | 0.01000000.0 | 1 | 47.900 | 0.0024   | 475.73 | -0.3 | 2 | '7/14  | 2245 |
| 1095 | R.LGQGIGPIHLNEIQCTGN<br>EK.S |              | 1 | 52.730 | 0.00079  | 726.70 | -1.5 | 3 | '17/38 | 5068 |
| 1096 | K.YLGEEYVKAVGNLRK.C          |              | 4 | 19.380 | 1.3      | 435.49 | -0.6 | 4 | '16/28 | 5307 |
| 1097 | K.ITIADCGLE.-                |              | 1 | 43.170 | 0.0048   | 560.27 | -1.2 | 2 | '7/18  | 3739 |
| 1098 | K.AGLVIGK.G                  |              | 3 | 38.660 | 0.016    | 329.22 | 1.1  | 2 | '9/12  | 2281 |
| 1099 | K.GGEIQPVSVK.V               |              | 1 | 45.790 | 0.0023   | 507.28 | 0.0  | 2 | '6/18  | 2089 |
| 1100 | K.QLEAIDQLHLEYAKR.A          |              | 1 | 19.760 | 1.4      | 457.50 | 0.1  | 4 | '17/28 | 4802 |
| 1101 | K.DCVGPEVEK.A                |              | 1 | 44.430 | 0.0016   | 516.74 | -0.5 | 2 | '10/16 | 1526 |
| 1102 | K.VTLTSEEEAR.L               |              | 1 | 47.910 | 0.0027   | 567.79 | 0.5  | 2 | '7/18  | 1807 |
| 1103 | K.DANNGNLQLR.N               |              | 1 | 44.910 | 0.0035   | 557.78 | -0.7 | 2 | '6/18  | 2099 |
| 1104 | K.TGGTQTDLFTCGK.C            |              | 1 | 86.600 | 1.5e-007 | 693.32 | -0.2 | 2 | '9/24  | 2936 |
| 1105 | R.EVEGELER.K                 |              | 1 | 36.230 | 0.028    | 480.73 | -1.4 | 2 | '5/14  | 1572 |
| 1106 | R.EVCSEQAETGPCR.A            |              | 2 | 63.330 | 5.7e-006 | 761.82 | 0.4  | 2 | '9/24  | 1305 |
| 1107 | K.SVEAAAELSAK.D              |              | 2 | 60.900 | 0.00014  | 538.29 | 0.1  | 2 | '13/20 | 2197 |
| 1108 | K.SNFSNSADDIKSK.K            |              | 2 | 46.760 | 0.0019   | 471.56 | -0.5 | 3 | '8/24  | 1930 |
| 1109 | R.EDITQSAQHAR.L              |              | 1 | 21.910 | 1.6      | 456.90 | 1.5  | 3 | '6/22  | 2819 |
| 1110 | K.AVAGNISDPGLQK.S            |              | 1 | 54.950 | 0.00035  | 635.34 | 1.3  | 2 | '8/24  | 2394 |
| 1111 | R.VEVTEFEDIK.S               |              | 1 | 60.510 | 0.00014  | 604.81 | -0.2 | 2 | '8/18  | 3916 |
| 1112 | R.TPITVVK.Q                  |              | 2 | 42.090 | 0.0088   | 379.24 | -0.4 | 2 | '6/12  | 2055 |
| 1113 | R.LLAQDQGGAPLLEPAP<br>.-     |              | 1 | 42.730 | 0.0083   | 859.46 | 1.6  | 2 | '8/32  | 4817 |
| 1114 | R.LLEGEESR.L                 |              | 1 | 47.490 | 0.0028   | 466.74 | -0.4 | 2 | '5/14  | 1588 |
| 1115 | K.NQVALNPQNTVFDAR.R          |              | 1 | 84.010 | 5.7e-007 | 829.93 | -1.1 | 2 | '17/28 | 3796 |
| 1116 | K.VGGTSDVEVNEK.K             |              | 1 | 67.040 | 2.4e-005 | 617.30 | -1.2 | 2 | '9/22  | 1411 |
| 1117 | R.LQAEVAQQK.S                |              | 1 | 36.660 | 0.056    | 572.31 | 2.6  | 2 | '7/18  | 1539 |
| 1118 | K.NNTQVLINCR.N               |              | 1 | 48.290 | 0.0024   | 616.32 | 1.5  | 2 | '7/18  | 2382 |
| 1119 | K.EELEQASQAHGAR.L            |              | 1 | 28.130 | 0.26     | 475.90 | -0.6 | 3 | '10/24 | 1685 |
| 1120 | K.AAFDIFVLGAEDGCISTK.<br>E   |              | 1 | 42.420 | 0.0073   | 957.47 | -0.5 | 2 | '12/34 | 6111 |
| 1121 | K.EGYGYTGAFR.C               |              | 2 | 48.310 | 0.00071  | 642.29 | -0.1 | 2 | '8/20  | 3924 |

|      |                            |   |        |          |        |      |   |        |      |
|------|----------------------------|---|--------|----------|--------|------|---|--------|------|
| 1122 | K.EEQKSNTAGSQSQVET<br>EA.- | 1 | 31.970 | 0.038    | 961.93 | 2.1  | 2 | '9/34  | 1368 |
| 1123 | R.LAADDFR.L                | 2 | 40.680 | 0.015    | 404.20 | 0.2  | 2 | '6/12  | 2407 |
| 1124 | R.EGELTVAQGR.V             | 1 | 48.690 | 0.0017   | 530.28 | 0.6  | 2 | '6/18  | 1926 |
| 1125 | K.SVIPSDGSPVACVKA          | 8 | 78.210 | 2.5e-006 | 772.41 | -0.6 | 2 | '12/28 | 2991 |
| 1126 | R.IIIIEELPK.-              | 1 | 34.770 | 0.014    | 477.80 | 0.1  | 2 | '5/14  | 3949 |
| 1127 | R.IELYQILK.S               | 1 | 31.020 | 0.045    | 510.31 | 0.9  | 2 | '4/14  | 5177 |
| 1128 | R.EGGLFPR.G                | 1 | 24.700 | 0.69     | 388.21 | 0.6  | 2 | '5/12  | 3151 |
| 1129 | K.LLEGEER.L                | 3 | 42.770 | 0.0059   | 487.74 | -0.7 | 2 | '7/14  | 1711 |
| 1130 | K.YHTINGHNAEVR.K           | 1 | 25.930 | 0.28     | 470.90 | -0.1 | 3 | '6/22  | 2858 |
| 1131 | M.KSVIPSDGSPVACVK.K        | 1 | 25.770 | 0.44     | 515.28 | -0.3 | 3 | '13/28 | 3100 |
| 1132 | R.AAPTAASDQPDSAATTE<br>K.A | 1 | 69.470 | 1.1e-005 | 866.41 | 0.2  | 2 | '21/34 | 1290 |
| 1133 | R.LAADDFR.T                | 2 | 40.680 | 0.015    | 404.20 | 0.2  | 2 | '6/12  | 2407 |
| 1134 | R.VLGLVLLR.G               | 1 | 54.440 | 1.2e-005 | 441.81 | -0.8 | 2 | '7/14  | 5812 |
| 1135 | K.CQSFR.D                  | 3 | 20.850 | 0.39     | 349.16 | 0.4  | 2 | '4/8   | 1093 |
| 1136 | R.NFSDNQLQEGK.N            | 1 | 56.650 | 0.00018  | 640.30 | 0.6  | 2 | '9/20  | 2149 |
| 1137 | R.VIAVNEVGR.S              | 1 | 50.800 | 0.00091  | 478.78 | 1.4  | 2 | '7/16  | 2362 |
| 1138 | R.AAVLLEQER.Q              | 1 | 63.860 | 5e-005   | 514.79 | 0.1  | 2 | '8/16  | 2729 |
| 1139 | R.LAADDFR.V                | 2 | 40.680 | 0.015    | 404.20 | 0.2  | 2 | '6/12  | 2407 |
| 1140 | R.AALQELLSK.G              | 1 | 59.080 | 0.00027  | 486.79 | -0.4 | 2 | '7/16  | 4321 |
| 1141 | R.SAGVPSRVIHIR.K           | 1 | 25.650 | 0.15     | 323.70 | 1.0  | 4 | '12/22 | 4059 |
| 1142 | R.VSFELFADKVPK.T           | 4 | 63.140 | 5.5e-005 | 690.38 | -0.1 | 2 | '10/22 | 5179 |
| 1143 | R.VEILANDQGNR.T            | 1 | 66.110 | 3.2e-005 | 614.82 | -0.2 | 2 | '8/20  | 2085 |
| 1144 | K.ELEKVCNPIITK.L           | 2 | 20.010 | 1.5      | 481.93 | -0.3 | 3 | '9/22  | 3332 |
| 1145 | K.SKEFQLFSSPHGK.D          | 6 | 54.990 | 0.00068  | 746.38 | -1.5 | 2 | '9/24  | 4562 |
| 1146 | K.HIAEDADRKYEEVAR.K        | 8 | 23.180 | 0.59     | 451.23 | -0.3 | 4 | '14/28 | 3277 |
| 1147 | R.EWEEAER.Q                | 1 | 24.620 | 0.082    | 474.71 | 0.8  | 2 | '5/12  | 1643 |
| 1148 | R.FGPGVAFR.A               | 1 | 35.730 | 0.043    | 425.73 | 1.4  | 2 | '7/14  | 3956 |
| 1149 | R.RGFCFITFK.E              | 1 | 35.310 | 0.049    | 588.31 | 0.1  | 2 | '5/16  | 5633 |
| 1150 | R.YGYTGAFR.C               | 1 | 37.610 | 0.012    | 549.26 | -1.9 | 2 | '7/16  | 3673 |
| 1151 | R.TDYNASVSPDSSGPER<br>.J   | 1 | 56.340 | 0.00019  | 890.90 | -0.3 | 2 | '10/32 | 2688 |
| 1152 | R.DQYELLCLDNTR.K           | 3 | 75.280 | 2.4e-006 | 770.36 | -1.4 | 2 | '18/22 | 4774 |
| 1153 | R.CSCASGFLAADGKR.C         | 1 | 29.190 | 0.12     | 538.26 | 2.4  | 3 | '17/28 | 4011 |
| 1154 | R.GFCFITFK.E               | 1 | 22.480 | 0.78     | 510.25 | 0.2  | 2 | '5/14  | 5401 |
| 1155 | K.EKYEKDIAAYR.A            | 4 | 25.500 | 0.42     | 462.57 | -0.4 | 3 | '8/20  | 3287 |
| 1156 | R.VLEEGSVEAR.T             | 1 | 52.820 | 0.00095  | 544.78 | -0.8 | 2 | '9/18  | 1887 |
| 1157 | M.PYQYPALTPEQKK.E          | 2 | 50.090 | 0.002    | 781.92 | 2.2  | 2 | '19/24 | 3278 |
| 1158 | K.SAADLISQAR.K             | 1 | 76.740 | 3.8e-006 | 516.28 | -0.1 | 2 | '14/18 | 2964 |

|      |                             |  |   |        |          |        |      |   |        |      |
|------|-----------------------------|--|---|--------|----------|--------|------|---|--------|------|
| 1159 | K.TQLAVCQQR.I               |  | 1 | 46.370 | 0.0042   | 552.28 | -0.2 | 2 | '7/16  | 1715 |
| 1160 | K.NFGIGQDIQPK.R             |  | 1 | 46.570 | 0.0039   | 608.82 | -2.5 | 2 | '8/20  | 3612 |
| 1161 | K.VALLDVFR.E                |  | 1 | 37.460 | 0.014    | 466.78 | -2.1 | 2 | '12/14 | 5667 |
| 1162 | R.LSLNIDPDAK.V              |  | 1 | 45.220 | 0.0036   | 543.30 | 1.2  | 2 | '6/18  | 3750 |
| 1163 | R.KLLASLVK.R                |  | 1 | 23.580 | 0.071    | 436.30 | -0.9 | 2 | '6/14  | 4951 |
| 1164 | K.KHLEINPDHSIETLR.Q         |  | 1 | 41.660 | 0.0071   | 479.52 | 0.5  | 4 | '8/30  | 5581 |
| 1165 | K.GKGGEIQPVSVK.V            |  | 2 | 48.060 | 0.0017   | 599.84 | -1.3 | 2 | '7/22  | 2365 |
| 1166 | K.KGGVASGFKHVPNEV<br>VVQR.L |  | 2 | 29.980 | 0.058    | 527.55 | 0.6  | 4 | '19/38 | 5131 |
| 1167 | R.NLLSVAYK.N                |  | 6 | 38.320 | 0.013    | 454.27 | 0.2  | 2 | '6/14  | 3866 |
| 1168 | K.TANKDHLVTAYNHLFETK<br>R.F |  | 1 | 43.240 | 0.0069   | 452.44 | -1.2 | 5 | '10/36 | 5522 |
| 1169 | K.IIPEIQK.V                 |  | 2 | 30.100 | 0.018    | 477.31 | 0.1  | 2 | '4/14  | 4361 |
| 1170 | R.FDEFFSEGCAPGSK.K          |  | 2 | 85.610 | 5e-008   | 789.34 | 3.9  | 2 | '11/26 | 4243 |
| 1171 | K.SQGGEPTYNVAVGR.A          |  | 1 | 91.860 | 8.8e-008 | 717.85 | 0.8  | 2 | '11/26 | 2490 |
| 1172 | R.EGTCPEAPTDECKPVK.<br>W    |  | 4 | 68.260 | 7.3e-006 | 909.41 | 0.3  | 2 | '8/30  | 1819 |
| 1173 | K.NLNEKDYELLCLDGTRK.<br>S   |  | 2 | 33.400 | 0.063    | 694.35 | 0.5  | 3 | '15/32 | 4487 |
| 1174 | K.SLESTTLTEK.E              |  | 1 | 53.200 | 0.00074  | 554.79 | 0.9  | 2 | '6/18  | 2240 |
| 1175 | K.LRQPFFQKR.S               |  | 2 | 21.180 | 0.67     | 407.24 | -3.4 | 3 | '6/16  | 4656 |
| 1176 | R.EYNEDEDPAAR.R             |  | 1 | 36.730 | 0.0034   | 654.77 | 3.7  | 2 | '7/20  | 1421 |
| 1177 | R.AFKAWAVAR.L               |  | 2 | 39.630 | 0.015    | 510.29 | -3.8 | 2 | '5/16  | 4422 |
| 1178 | K.IDIIPNPQER.T              |  | 1 | 24.210 | 0.48     | 597.83 | 5.0  | 2 | '5/18  | 3712 |
| 1179 | R.LLIHQSLAGGIIVK.G          |  | 1 | 32.000 | 0.0071   | 506.98 | 0.2  | 3 | '9/28  | 5489 |
| 1180 | K.EETQPPVALKK.E             |  | 1 | 31.400 | 0.064    | 413.90 | -0.2 | 3 | '14/20 | 2107 |
| 1181 | K.IGPLGLSPK.K               |  | 1 | 38.090 | 0.0046   | 441.28 | -1.0 | 2 | '10/16 | 3885 |
| 1182 | K.ILDILGETCK.S              |  | 3 | 56.540 | 0.00041  | 581.31 | 0.8  | 2 | '6/18  | 4624 |
| 1183 | R.DAQDVQASQAEADQQQ<br>TR.L  |  | 2 | 78.250 | 8.4e-007 | 994.95 | -1.3 | 2 | '9/34  | 1540 |
| 1184 | R.QAFQIGSPWR.T              |  | 1 | 52.550 | 0.00099  | 595.31 | -0.1 | 2 | '8/18  | 4622 |
| 1185 | R.GDLGIEIPA EK.V            |  | 2 | 34.490 | 0.041    | 571.31 | -4.9 | 2 | '11/20 | 3897 |
| 1186 | R.VLDELTLAR.A               |  | 1 | 61.030 | 0.00013  | 515.30 | -0.3 | 2 | '8/16  | 4038 |
| 1187 | R.KYAVLYQPLFDKR.F           |  | 1 | 29.150 | 0.1      | 547.65 | 4.5  | 3 | '9/24  | 5434 |
| 1188 | R.ADLAKYICENQDSISSK.<br>L   |  | 1 | 22.680 | 0.76     | 647.98 | -3.3 | 3 | '15/32 | 4017 |
| 1189 | K.AGAVEKGVPLYR.H            |  | 1 | 21.290 | 1        | 420.57 | -0.3 | 3 | '11/22 | 3269 |
| 1190 | R.IVAPGKGILADESTGSI<br>AK.R |  | 1 | 67.310 | 1.5e-005 | 633.36 | -1.3 | 3 | '12/38 | 4706 |
| 1191 | R.IEDVTPIPSDSTR.R           |  | 1 | 55.400 | 0.00041  | 715.36 | -1.8 | 2 | '11/24 | 2900 |
| 1192 | R.VFIGNLNTLVVK.K            |  | 3 | 68.310 | 4.3e-006 | 658.90 | 3.5  | 2 | '10/22 | 5204 |

|      |                        |  |   |        |          |        |      |   |        |      |
|------|------------------------|--|---|--------|----------|--------|------|---|--------|------|
| 1193 | K.WKDSDEADLVLAKE       |  | 1 | 65.190 | 4.6e-005 | 497.26 | 0.0  | 3 | '8/24  | 3937 |
| 1194 | R.ETQSQLETER.S         |  | 1 | 35.000 | 0.031    | 610.79 | -0.8 | 2 | '7/18  | 1231 |
| 1195 | M.PFSNSHNALKLRF        |  | 1 | 24.020 | 0.51     | 346.69 | -1.3 | 4 | '12/22 | 4409 |
| 1196 | K.ESEFDDEPK.F          |  | 1 | 65.900 | 5.4e-006 | 548.23 | 0.7  | 2 | '7/16  | 1680 |
| 1197 | R.VSLASPNR.G           |  | 2 | 33.750 | 0.052    | 422.24 | -0.1 | 2 | '6/14  | 1977 |
| 1198 | K.SQGAALDKYAK.K        |  | 1 | 29.230 | 0.16     | 384.54 | 0.7  | 3 | '7/20  | 2441 |
| 1199 | K.CCSGAIIVLTK.S        |  | 1 | 36.250 | 0.13     | 611.32 | 1.6  | 2 | '9/20  | 3763 |
| 1200 | R.SLDADEFK.R           |  | 1 | 29.720 | 0.083    | 476.72 | -0.3 | 2 | '7/14  | 2827 |
| 1201 | K.LAPEFAKR.N           |  | 1 | 20.230 | 1.6      | 311.18 | -1.4 | 3 | '5/14  | 2802 |
| 1202 | K.AKHDELTYF.-          |  | 1 | 24.620 | 0.62     | 562.27 | -0.3 | 2 | '6/16  | 4385 |
| 1203 | K.AALEDTLAETEAR.F      |  | 1 | 89.900 | 1.7e-007 | 695.35 | -0.4 | 2 | '10/24 | 3534 |
| 1204 | K.LLEGEESR.I           |  | 3 | 47.490 | 0.0028   | 466.74 | -0.4 | 2 | '5/14  | 1588 |
| 1205 | R.RGFVFITFK.E          |  | 1 | 23.500 | 0.73     | 557.82 | 1.0  | 2 | '4/16  | 5890 |
| 1206 | R.SQSAAVTPSSTTSSTR.A   |  | 1 | 53.270 | 0.00053  | 784.38 | 0.2  | 2 | '9/30  | 1154 |
| 1207 | K.LLEGEESR.L           |  | 2 | 47.490 | 0.0028   | 466.74 | -0.4 | 2 | '5/14  | 1588 |
| 1208 | K.IQQLVKEFFNGK.E       |  | 1 | 25.300 | 0.31     | 484.27 | -0.3 | 3 | '5/22  | 6006 |
| 1209 | R.GSAVWCQNVK.T         |  | 1 | 42.410 | 0.0071   | 574.78 | -1.3 | 2 | '7/18  | 2678 |
| 1210 | R.VNHVTLSPK.I          |  | 1 | 30.720 | 0.085    | 374.88 | -0.4 | 3 | '9/18  | 2087 |
| 1211 | R.VLDELTLAR.T          |  | 2 | 61.030 | 0.00013  | 515.30 | -0.3 | 2 | '8/16  | 4038 |
| 1212 | R.SKVDEAVAVLQAHQAK.E   |  | 3 | 54.560 | 0.00044  | 565.31 | -4.2 | 3 | '14/30 | 4296 |
| 1213 | R.ISSSSFVR.V           |  | 1 | 33.030 | 0.037    | 435.72 | -0.1 | 2 | '7/14  | 1599 |
| 1214 | R.SSFYVNGLTLGGQK.C     |  | 3 | 92.100 | 8.9e-008 | 735.88 | 0.1  | 2 | '19/26 | 4495 |
| 1215 | K.DKEACVHK.I           |  | 2 | 29.130 | 0.069    | 329.50 | -0.5 | 3 | '6/14  | 1028 |
| 1216 | K.LQDAEIAR.L           |  | 1 | 53.430 | 0.00065  | 458.25 | 0.2  | 2 | '7/14  | 1662 |
| 1217 | K.ELVSSSSGSDSDSEVDKK.L |  | 2 | 81.060 | 3.8e-007 | 971.94 | -0.6 | 2 | '14/36 | 1529 |
| 1218 | K.EVANSTANLVK.T        |  | 1 | 53.000 | 0.00086  | 573.31 | -0.7 | 2 | '9/20  | 2072 |
| 1219 | R.IINEPTAAAIYGLDKK.G   |  | 1 | 26.130 | 0.23     | 596.67 | -0.7 | 3 | '12/32 | 4557 |
| 1220 | K.GEFVTTVQQR.G         |  | 1 | 49.000 | 0.0019   | 582.80 | -0.1 | 2 | '8/18  | 2519 |
| 1221 | K.SEEEESSSVKDETNIK.M   |  | 2 | 31.910 | 0.06     | 670.99 | -1.5 | 3 | '17/34 | 1511 |

#

Serial (sequential) number for peptide.

Sequence

Assigned peptide sequence. Periods (".") delimit the sequence for internal peptides.

PTM Site

Location of the post-translational modification (PTM) in the peptide.

Modification codes: [1] Oxidation (M)

*Nr. Scans*

The number of MS/MS scans that were matched to this peptide.

*Mascot Score*

Score given to this peptide/spectrum match by Mascot.

*Expectation*

The number of matches with equal or better scores that are expected to occur by chance alone.

*Isolated Mass*

"Mass" in the Orbitrap analyzer.

*Delta Mass*

Difference between the observed and theoretical masses, in ppm.

*Charge State*

Inferred ionic state of the peptide.

*Matched Ions*

Number of matched MS/MS ions, as reported by Mascot.

*Scan Nr.*

MS/MS scan number in the original Xcalibur RAW file.
