# Supplementary material
Source: PubMed Central journal article supplement (PMC4349970)
Supplement: supp_M114.039909_mcp.M114.039909-4.pdf [file supp_M114.039909_mcp.M114.039909-4.pdf]

# RI NSF/EPSCoR Proteomics Facility

## Mass Spectrometry Report

### Protein Groups and Peptide-Spectrum Matches (PSMs)

Sample: Ctr  
Researcher: Djuro Josic  
Data collected: 24 Aug 2011  
Results filtering: Unique PSMs; MOWSE Score > 20.6

MS data file: Ctr\_082511\_224859.raw  
Instrument type: ESI-FTICR  
Search engine: Mascot  
Parameter file: N/D  
Search database: N/D (269577 entries)  
Enzyme specificity: Trypsin (2 missed cleavages allowed)  
MS mass tolerance: 20 ppm; MS/MS tolerance 0.5 Da  
Fixed modifications: Carbamidomethyl (C)  
Var. modifications: [1] Oxidation (M)  
Number of spectra: 3176  
Input PSMs: 124 'Target'; 3 'Decoy'; 2.4% FDR  
Output PSMs: 124

| <b>UniProt<br/>Human<br/>Protein<br/>IDs</b> |                                  |                     |                                    |                             |                        |                            |                                   |
|----------------------------------------------|----------------------------------|---------------------|------------------------------------|-----------------------------|------------------------|----------------------------|-----------------------------------|
| <i>Gr<br/>p<br/>Nr.</i>                      | <i>Accessio<br/>n<br/>Number</i> | <i>Protein Name</i> | <i>Prote<br/>in<br/>Scor<br/>e</i> | <i>Uniqu<br/>e<br/>PSMs</i> | <i>PSM Serial Nrs.</i> | <i>Oth<br/>er<br/>Grp.</i> | <i>%<br/>Seq.<br/>Cove<br/>r.</i> |

|   |        |                                                                                                                   |         |    |                                                                                                                                                                                |  |      |
|---|--------|-------------------------------------------------------------------------------------------------------------------|---------|----|--------------------------------------------------------------------------------------------------------------------------------------------------------------------------------|--|------|
| 1 | Q53H26 | Transferrin variant (Fragment) OS=Homo sapiens PE=2 SV=1                                                          | 2321.40 | 50 | 4 5 6 12 13 17 20 21 24<br>26 27 31 33 36 37 38<br>41 44 46 48 49 53 55<br>56 57 58 60 62 64 69<br>72 73 75 79 80 81 84<br>86 87 91 92 96 98 103<br>104 111 114 118 122<br>123 |  | 56.6 |
| 2 | P02768 | Serum albumin OS=Homo sapiens GN=ALB PE=1 SV=2                                                                    | 293.28  | 6  | 8 10 23 39 45 109                                                                                                                                                              |  | 13.4 |
|   | H0YA55 | Serum albumin (Fragment) OS=Homo sapiens GN=ALB PE=4 SV=1                                                         | 293.28  | 6  | 8 10 23 39 45 109                                                                                                                                                              |  | 13.4 |
|   | F6KPG5 | Albumin (Fragment) OS=Homo sapiens PE=2 SV=1                                                                      | 293.28  | 6  | 8 10 23 39 45 109                                                                                                                                                              |  | 13.4 |
|   | B4DPR2 | cDNA FLJ50830, highly similar to Serum albumin OS=Homo sapiens PE=2 SV=1                                          | 293.28  | 6  | 8 10 23 39 45 109                                                                                                                                                              |  | 13.4 |
|   | B4DPP6 | cDNA FLJ54371, highly similar to Serum albumin OS=Homo sapiens PE=2 SV=1                                          | 293.28  | 6  | 8 10 23 39 45 109                                                                                                                                                              |  | 13.4 |
|   | B2RBS8 | cDNA, FLJ95666, highly similar to Homo sapiens albumin (ALB), mRNA OS=Homo sapiens PE=2 SV=1                      | 293.28  | 6  | 8 10 23 39 45 109                                                                                                                                                              |  | 13.4 |
|   | A8K9P0 | cDNA FLJ78413, highly similar to Homo sapiens albumin, mRNA OS=Homo sapiens PE=2 SV=1                             | 293.28  | 6  | 8 10 23 39 45 109                                                                                                                                                              |  | 13.4 |
| 3 | P68133 | Actin, alpha skeletal muscle OS=Homo sapiens GN=ACTA1 PE=1 SV=1                                                   | 267.11  | 5  | 1 28 61 102 119                                                                                                                                                                |  | 15.7 |
|   | P68032 | Actin, alpha cardiac muscle 1 OS=Homo sapiens GN=ACTC1 PE=1 SV=1                                                  | 267.11  | 5  | 1 28 61 102 119                                                                                                                                                                |  | 15.7 |
|   | B7Z6P1 | cDNA FLJ53662, highly similar to Actin, alpha skeletal muscle OS=Homo sapiens PE=2 SV=1                           | 267.11  | 5  | 1 28 61 102 119                                                                                                                                                                |  | 15.7 |
|   | A8K3K1 | cDNA FLJ78096, highly similar to Homo sapiens actin, alpha, cardiac muscle (ACTC), mRNA OS=Homo sapiens PE=2 SV=1 | 267.11  | 5  | 1 28 61 102 119                                                                                                                                                                |  | 15.7 |
| 4 | Q8TCG3 | TPMsk3 (Fragment) OS=Homo sapiens GN=TPM3 PE=2 SV=1                                                               | 224.73  | 4  | 16 51 65 110                                                                                                                                                                   |  | 27.4 |
|   | Q5VU72 | Tropomyosin 3, isoform CRA_a OS=Homo sapiens GN=TPM3 PE=3 SV=1                                                    | 224.73  | 4  | 16 51 65 110                                                                                                                                                                   |  | 27.4 |
|   | Q5VU66 | Tropomyosin alpha-3 chain OS=Homo sapiens GN=TPM3 PE=4 SV=1                                                       | 224.73  | 4  | 16 51 65 110                                                                                                                                                                   |  | 27.4 |
|   | Q5VU59 | Tropomyosin alpha-3 chain OS=Homo sapiens GN=TPM3 PE=3 SV=1                                                       | 224.73  | 4  | 16 51 65 110                                                                                                                                                                   |  | 27.4 |
|   | Q5VU58 | Tropomyosin 3, isoform CRA_b OS=Homo sapiens GN=TPM3 PE=3 SV=1                                                    | 224.73  | 4  | 16 51 65 110                                                                                                                                                                   |  | 27.4 |
|   | Q5HYB6 | Putative uncharacterized protein DKFZp686J1372 OS=Homo sapiens GN=DKFZp686J1372 PE=2 SV=1                         | 224.73  | 4  | 16 51 65 110                                                                                                                                                                   |  | 27.4 |
|   | B2RDE1 | cDNA, FLJ96568, highly similar to Homo sapiens tropomyosin 3 (TPM3), mRNA OS=Homo sapiens PE=2 SV=1               | 224.73  | 4  | 16 51 65 110                                                                                                                                                                   |  | 27.4 |
| 5 | Q6ZN40 | Tropomyosin 1 (Alpha), isoform CRA_f OS=Homo sapiens GN=TPM1 PE=2 SV=1                                            | 202.67  | 7  | 19 42 54 63 99 105 120                                                                                                                                                         |  | 32.2 |

|    |        |                                                                                            |        |   |               |  |      |
|----|--------|--------------------------------------------------------------------------------------------|--------|---|---------------|--|------|
| 6  | P69905 | Hemoglobin subunit alpha OS=Homo sapiens GN=HBA1 PE=1 SV=2                                 | 141.29 | 4 | 30 85 100 108 |  | 36.6 |
|    | I1VZV6 | Hemoglobin alpha 1 OS=Homo sapiens GN=HBA1 PE=3 SV=1                                       | 141.29 | 4 | 30 85 100 108 |  | 36.6 |
|    | E9M4D4 | Hemoglobin alpha-1 globin chain (Fragment) OS=Homo sapiens GN=HBA1 PE=3 SV=1               | 141.29 | 4 | 30 85 100 108 |  | 36.6 |
|    | D1MGQ2 | Alpha-2 globin chain OS=Homo sapiens GN=HBA2 PE=2 SV=1                                     | 141.29 | 4 | 30 85 100 108 |  | 36.6 |
| 7  | P13533 | Myosin-6 OS=Homo sapiens GN=MYH6 PE=1 SV=5                                                 | 118.42 | 3 | 34 89 115     |  | 4.8  |
|    | P12883 | Myosin-7 OS=Homo sapiens GN=MYH7 PE=1 SV=5                                                 | 118.42 | 3 | 34 89 115     |  | 4.8  |
|    | D9YZU2 | Myosin, heavy chain 6, cardiac muscle, alpha OS=Homo sapiens GN=MYH6 PE=2 SV=1             | 118.42 | 3 | 34 89 115     |  | 4.8  |
|    | A5YM51 | MYH7 protein (Fragment) OS=Homo sapiens GN=MYH7 PE=2 SV=1                                  | 118.42 | 3 | 34 89 115     |  | 4.8  |
| 8  | P01185 | Vasopressin-neurophysin 2-copeptin OS=Homo sapiens GN=AVP PE=1 SV=2                        | 111.88 | 4 | 3 74 88 106   |  | 12.2 |
| 9  | P01308 | Insulin OS=Homo sapiens GN=INS PE=1 SV=1                                                   | 100.84 | 2 | 35 70         |  | 25.5 |
|    | I3WAC9 | Preproinsulin OS=Homo sapiens GN=INS PE=3 SV=1                                             | 100.84 | 2 | 35 70         |  | 25.5 |
|    | F6MZK5 | Insulin (Precursor) OS=Homo sapiens GN=INS PE=2 SV=1                                       | 100.84 | 2 | 35 70         |  | 25.5 |
|    | A6XGL2 | Insulin OS=Homo sapiens GN=INS PE=3 SV=1                                                   | 100.84 | 2 | 35 70         |  | 25.5 |
| 10 | P30049 | ATP synthase subunit delta, mitochondrial OS=Homo sapiens GN=ATP5D PE=1 SV=2               | 97.02  | 2 | 47 50         |  | 7.1  |
| 11 | G3V1N2 | HCG1745306, isoform CRA_a OS=Homo sapiens GN=HBA2 PE=3 SV=1                                | 75.60  | 3 | 43 107 113    |  | 29.1 |
| 12 | H7BZJ3 | Thioredoxin (Fragment) OS=Homo sapiens GN=PDIA3 PE=2 SV=1                                  | 73.00  | 1 | 52            |  | 11.4 |
| 13 | A7XZE4 | Beta tropomyosin isoform OS=Homo sapiens GN=TPM2b PE=2 SV=1                                | 72.44  | 3 | 25 32 117     |  | 28.9 |
| 14 | Q59FG9 | Chondroitin sulfate proteoglycan 2 (Versican) variant (Fragment) OS=Homo sapiens PE=2 SV=1 | 64.82  | 1 | 101           |  | 36.6 |
|    | P13611 | Versican core protein OS=Homo sapiens GN=VCAN PE=1 SV=3                                    | 64.82  | 1 | 101           |  | 36.6 |
| 15 | Q6LAM1 | Heavy chain of factor I (Fragment) OS=Homo sapiens PE=2 SV=1                               | 60.03  | 1 | 121           |  | 7.2  |
| 16 | P17540 | Creatine kinase S-type, mitochondrial OS=Homo sapiens GN=CKMT2 PE=1 SV=2                   | 59.29  | 1 | 40            |  | 5.7  |
|    | D6RHV3 | Creatine kinase S-type, mitochondrial (Fragment) OS=Homo sapiens GN=CKMT2 PE=2 SV=1        | 59.29  | 1 | 40            |  | 5.7  |
|    | D6R998 | Creatine kinase S-type, mitochondrial (Fragment) OS=Homo sapiens GN=CKMT2 PE=2 SV=1        | 59.29  | 1 | 40            |  | 5.7  |

|    |        |                                                                                                                                                                                   |       |   |     |  |      |
|----|--------|-----------------------------------------------------------------------------------------------------------------------------------------------------------------------------------|-------|---|-----|--|------|
|    | B3KVA7 | cDNA FLJ16309 fis, clone SKMUS2007816, highly similar to Creatine kinase, sarcomeric mitochondrial (EC 2.7.3.2) OS=Homo sapiens PE=2 SV=1                                         | 59.29 | 1 | 40  |  | 5.7  |
|    | B2R8A3 | cDNA, FLJ93805, highly similar to Homo sapiens creatine kinase, mitochondrial 2 (sarcomeric) (CKMT2), nuclear gene encoding mitochondrial protein, mRNA OS=Homo sapiens PE=2 SV=1 | 59.29 | 1 | 40  |  | 5.7  |
| 17 | B4E1B2 | cDNA FLJ53691, highly similar to Serotransferrin OS=Homo sapiens PE=2 SV=1                                                                                                        | 56.27 | 1 | 18  |  | 54.7 |
| 18 | Q6FHV6 | ENO2 protein OS=Homo sapiens GN=ENO2 PE=2 SV=1                                                                                                                                    | 53.23 | 1 | 77  |  | 3.2  |
|    | P09104 | Gamma-enolase OS=Homo sapiens GN=ENO2 PE=1 SV=3                                                                                                                                   | 53.23 | 1 | 77  |  | 3.2  |
|    | F5H0C8 | Enolase OS=Homo sapiens GN=ENO2 PE=2 SV=1                                                                                                                                         | 53.23 | 1 | 77  |  | 3.2  |
|    | B7Z2X9 | Enolase OS=Homo sapiens GN=ENO2 PE=2 SV=1                                                                                                                                         | 53.23 | 1 | 77  |  | 3.2  |
|    | A8K3B0 | cDNA FLJ77877, highly similar to Human ENO2 neuron specific (gamma) enolase OS=Homo sapiens PE=2 SV=1                                                                             | 53.23 | 1 | 77  |  | 3.2  |
| 19 | Q08043 | Alpha-actinin-3 OS=Homo sapiens GN=ACTN3 PE=1 SV=2                                                                                                                                | 51.37 | 1 | 82  |  | 2.8  |
|    | P35609 | Alpha-actinin-2 OS=Homo sapiens GN=ACTN2 PE=1 SV=1                                                                                                                                | 51.37 | 1 | 82  |  | 2.8  |
|    | B7Z4V1 | cDNA FLJ55401, highly similar to Alpha-actinin-2 OS=Homo sapiens PE=2 SV=1                                                                                                        | 51.37 | 1 | 82  |  | 2.8  |
|    | B4DZQ2 | cDNA FLJ58651, highly similar to Alpha-actinin-3 OS=Homo sapiens PE=2 SV=1                                                                                                        | 51.37 | 1 | 82  |  | 2.8  |
|    | B2R8Y4 | cDNA, FLJ94117, highly similar to Homo sapiens actinin, alpha 3 (ACTN3), mRNA OS=Homo sapiens PE=2 SV=1                                                                           | 51.37 | 1 | 82  |  | 2.8  |
| 20 | Q0QEN7 | ATP synthase subunit beta (Fragment) OS=Homo sapiens GN=ATP5B PE=2 SV=1                                                                                                           | 49.48 | 1 | 94  |  | 5.4  |
|    | P06576 | ATP synthase subunit beta, mitochondrial OS=Homo sapiens GN=ATP5B PE=1 SV=3                                                                                                       | 49.48 | 1 | 94  |  | 5.4  |
|    | F8W079 | ATP synthase subunit beta, mitochondrial (Fragment) OS=Homo sapiens GN=ATP5B PE=2 SV=1                                                                                            | 49.48 | 1 | 94  |  | 5.4  |
|    | F8VQY0 | ATP synthase subunit beta, mitochondrial (Fragment) OS=Homo sapiens GN=ATP5B PE=2 SV=1                                                                                            | 49.48 | 1 | 94  |  | 5.4  |
|    | F8VPV9 | ATP synthase subunit beta OS=Homo sapiens GN=ATP5B PE=2 SV=1                                                                                                                      | 49.48 | 1 | 94  |  | 5.4  |
| 21 | P16615 | Sarcoplasmic/endoplasmic reticulum calcium ATPase 2 OS=Homo sapiens GN=ATP2A2 PE=1 SV=1                                                                                           | 46.17 | 1 | 11  |  | 4.0  |
|    | H7C5W9 | Sarcoplasmic/endoplasmic reticulum calcium ATPase 2 (Fragment) OS=Homo sapiens GN=ATP2A2 PE=3 SV=1                                                                                | 46.17 | 1 | 11  |  | 4.0  |
| 22 | Q53HG2 | NADH dehydrogenase (Ubiquinone) Fe-S protein 2, 49kDa (NADH-coenzyme Q reductase) variant (Fragment) OS=Homo sapiens PE=2 SV=1                                                    | 43.40 | 1 | 124 |  | 5.0  |
|    | O75306 | NADH dehydrogenase [ubiquinone] iron-sulfur protein 2, mitochondrial OS=Homo sapiens GN=NDUFS2 PE=1 SV=2                                                                          | 43.40 | 1 | 124 |  | 5.0  |
| 23 | Q6FI52 | TAGLN protein OS=Homo sapiens GN=TAGLN PE=2 SV=1                                                                                                                                  | 41.32 | 1 | 112 |  | 6.0  |
|    | Q5U0D2 | Putative uncharacterized protein DKFzP686P11128 OS=Homo sapiens GN=TAGLN PE=2 SV=1                                                                                                | 41.32 | 1 | 112 |  | 6.0  |
|    | Q53GC9 | Transgelin variant (Fragment) OS=Homo sapiens PE=2 SV=1                                                                                                                           | 41.32 | 1 | 112 |  | 6.0  |

|    |        |                                                                                                      |       |   |     |  |      |
|----|--------|------------------------------------------------------------------------------------------------------|-------|---|-----|--|------|
|    | Q01995 | Transgelin OS=Homo sapiens GN=TAGLN PE=1 SV=4                                                        | 41.32 | 1 | 112 |  | 6.0  |
|    | E9PJ32 | Transgelin (Fragment) OS=Homo sapiens GN=TAGLN PE=2 SV=1                                             | 41.32 | 1 | 112 |  | 6.0  |
| 24 | Q5JQ13 | Vinculin (Fragment) OS=Homo sapiens GN=VCL PE=2 SV=1                                                 | 41.25 | 1 | 22  |  | 1.1  |
|    | P18206 | Vinculin OS=Homo sapiens GN=VCL PE=1 SV=4                                                            | 41.25 | 1 | 22  |  | 1.1  |
|    | B4E3Q9 | cDNA FLJ59659, highly similar to Vinculin OS=Homo sapiens PE=2 SV=1                                  | 41.25 | 1 | 22  |  | 1.1  |
|    | B3KXA2 | cDNA FLJ45031 fis, clone BRAWH3018548, highly similar to Vinculin OS=Homo sapiens PE=2 SV=1          | 41.25 | 1 | 22  |  | 1.1  |
| 25 | P06753 | Tropomyosin alpha-3 chain OS=Homo sapiens GN=TPM3 PE=1 SV=1                                          | 40.15 | 1 | 93  |  | 19.3 |
|    | J3KN67 | Tropomyosin alpha-3 chain OS=Homo sapiens GN=TPM3 PE=3 SV=1                                          | 40.15 | 1 | 93  |  | 19.3 |
| 26 | A1A5C4 | RRBP1 protein OS=Homo sapiens GN=RRBP1 PE=2 SV=1                                                     | 38.79 | 1 | 59  |  | 1.1  |
| 27 | A0N4V7 | HCG2039797 (Fragment) OS=Homo sapiens GN=Tcr-alpha PE=4 SV=1                                         | 34.78 | 1 | 95  |  | 38.1 |
| 28 | Q96BA4 | NUCB1 protein OS=Homo sapiens PE=2 SV=1                                                              | 34.55 | 1 | 2   |  | 6.5  |
|    | Q53GX6 | Nucleobindin 1 variant (Fragment) OS=Homo sapiens PE=2 SV=1                                          | 34.55 | 1 | 2   |  | 6.5  |
|    | Q02818 | Nucleobindin-1 OS=Homo sapiens GN=NUCB1 PE=1 SV=4                                                    | 34.55 | 1 | 2   |  | 6.5  |
|    | B4DZX0 | cDNA FLJ52898, highly similar to Nucleobindin-1 OS=Homo sapiens PE=2 SV=1                            | 34.55 | 1 | 2   |  | 6.5  |
|    | B3KUR6 | cDNA FLJ40471 fis, clone TESTI2042508, highly similar to Nucleobindin-1 OS=Homo sapiens PE=2 SV=1    | 34.55 | 1 | 2   |  | 6.5  |
|    | A8K7Q1 | cDNA FLJ77770, highly similar to Homo sapiens nucleobindin 1 (NUCB1), mRNA OS=Homo sapiens PE=2 SV=1 | 34.55 | 1 | 2   |  | 6.5  |

**UniProt  
Human  
Protein  
IDs,  
cont.**

| Gr<br>p<br>Nr. | Accession<br>Number | Protein Name                                                                       | Protein<br>Score | Unique<br>PSMs | PSM Serial Nrs. | Other<br>Grp. | %<br>Seq.<br>Cove<br>r. |
|----------------|---------------------|------------------------------------------------------------------------------------|------------------|----------------|-----------------|---------------|-------------------------|
| 29             | Q9Y2G9              | Protein strawberry notch homolog 2 OS=Homo sapiens GN=SBNO2 PE=2 SV=3              | 34.02            | 1              | 29              |               | 1.2                     |
|                | K7ES28              | Protein strawberry notch homolog 2 OS=Homo sapiens GN=SBNO2 PE=4 SV=1              | 34.02            | 1              | 29              |               | 1.2                     |
| 30             | B4DUA3              | cDNA FLJ50067, weakly similar to Dynamin-binding protein OS=Homo sapiens PE=2 SV=1 | 33.75            | 1              | 66              |               | 27.4                    |

|    |        |                                                                                                                                                               |       |   |     |  |      |
|----|--------|---------------------------------------------------------------------------------------------------------------------------------------------------------------|-------|---|-----|--|------|
|    | B4DTT4 | cDNA FLJ54440, weakly similar to Dynamin-binding protein OS=Homo sapiens PE=2 SV=1                                                                            | 33.75 | 1 | 66  |  | 27.4 |
|    | A1IGU5 | Rho guanine nucleotide exchange factor 37 OS=Homo sapiens GN=ARHGEF37 PE=2 SV=2                                                                               | 33.75 | 1 | 66  |  | 27.4 |
| 31 | P10809 | 60 kDa heat shock protein, mitochondrial OS=Homo sapiens GN=HSPD1 PE=1 SV=2                                                                                   | 33.35 | 1 | 97  |  | 5.4  |
|    | B7Z5E7 | cDNA FLJ51046, highly similar to 60 kDa heat shock protein, mitochondrial OS=Homo sapiens PE=2 SV=1                                                           | 33.35 | 1 | 97  |  | 5.4  |
|    | B7Z597 | cDNA FLJ54373, highly similar to 60 kDa heat shock protein, mitochondrial OS=Homo sapiens PE=2 SV=1                                                           | 33.35 | 1 | 97  |  | 5.4  |
|    | B7Z532 | cDNA FLJ51028, highly similar to 60 kDa heat shock protein, mitochondrial OS=Homo sapiens PE=2 SV=1                                                           | 33.35 | 1 | 97  |  | 5.4  |
|    | B3GQS7 | Mitochondrial heat shock 60kD protein 1 variant 1 OS=Homo sapiens GN=HSPD1 PE=2 SV=1                                                                          | 33.35 | 1 | 97  |  | 5.4  |
| 32 | Q567R0 | UQCRH protein OS=Homo sapiens GN=UQCRH PE=2 SV=1                                                                                                              | 31.31 | 1 | 78  |  | 8.2  |
|    | P07919 | Cytochrome b-c1 complex subunit 6, mitochondrial OS=Homo sapiens GN=UQCRH PE=1 SV=2                                                                           | 31.31 | 1 | 78  |  | 8.2  |
| 33 | B8ZZ54 | 10 kDa heat shock protein, mitochondrial OS=Homo sapiens GN=HSPE1 PE=3 SV=1                                                                                   | 30.40 | 1 | 90  |  | 53.2 |
| 34 | F4MHR1 | Ubiquitously transcribed tetratricopeptide repeat protein Y-linked transcript variant 83 OS=Homo sapiens GN=UTY PE=2 SV=1                                     | 30.01 | 1 | 67  |  | 27.4 |
| 35 | Q99798 | Aconitate hydratase, mitochondrial OS=Homo sapiens GN=ACO2 PE=1 SV=2                                                                                          | 27.89 | 1 | 116 |  | 3.0  |
|    | Q71UF1 | Aconitase OS=Homo sapiens GN=ACO2 PE=2 SV=1                                                                                                                   | 27.89 | 1 | 116 |  | 3.0  |
|    | O75944 | Aconitase (Fragment) OS=Homo sapiens GN=ACON PE=2 SV=1                                                                                                        | 27.89 | 1 | 116 |  | 3.0  |
|    | B4DZ08 | cDNA FLJ51705, highly similar to Aconitate hydratase, mitochondrial (EC 4.2.1.3) OS=Homo sapiens PE=2 SV=1                                                    | 27.89 | 1 | 116 |  | 3.0  |
|    | B4DW08 | cDNA FLJ50886, highly similar to Aconitate hydratase, mitochondrial (EC 4.2.1.3) OS=Homo sapiens PE=2 SV=1                                                    | 27.89 | 1 | 116 |  | 3.0  |
|    | B4DLY4 | cDNA FLJ52327, highly similar to Aconitate hydratase, mitochondrial (EC 4.2.1.3) OS=Homo sapiens PE=2 SV=1                                                    | 27.89 | 1 | 116 |  | 3.0  |
|    | B4DJW1 | cDNA FLJ54329, highly similar to Aconitate hydratase, mitochondrial (EC 4.2.1.3) OS=Homo sapiens PE=2 SV=1                                                    | 27.89 | 1 | 116 |  | 3.0  |
|    | B4DEC3 | cDNA FLJ60429, highly similar to Aconitate hydratase, mitochondrial (EC 4.2.1.3) OS=Homo sapiens PE=2 SV=1                                                    | 27.89 | 1 | 116 |  | 3.0  |
|    | B2RBW5 | cDNA, FLJ95737, highly similar to Homo sapiens aconitase 2, mitochondrial (ACO2), nuclear gene encoding mitochondrial protein, mRNA OS=Homo sapiens PE=2 SV=1 | 27.89 | 1 | 116 |  | 3.0  |
|    | A2A274 | Aconitate hydratase, mitochondrial OS=Homo sapiens GN=ACO2 PE=4 SV=1                                                                                          | 27.89 | 1 | 116 |  | 3.0  |
| 36 | D9YZV8 | Tropomyosin 1 (Alpha) isoform 7 OS=Homo sapiens GN=TPM1 PE=3 SV=1                                                                                             | 27.22 | 1 | 76  |  | 35.6 |
| 37 | Q5CZ94 | Putative uncharacterized protein DKFZp781M0386 OS=Homo sapiens GN=DKFZp781M0386 PE=2 SV=1                                                                     | 26.67 | 1 | 9   |  | 13.4 |

|    |        |                                                                                                                        |       |   |    |  |      |
|----|--------|------------------------------------------------------------------------------------------------------------------------|-------|---|----|--|------|
| 38 | Q12904 | Aminoacyl tRNA synthase complex-interacting multifunctional protein 1 OS=Homo sapiens GN=AIMP1 PE=1 SV=2               | 25.18 | 1 | 83 |  | 2.6  |
| 39 | H0Y450 | Probable arginine--tRNA ligase, mitochondrial (Fragment) OS=Homo sapiens GN=RARS2 PE=3 SV=1                            | 24.66 | 1 | 71 |  | 25.5 |
| 40 | Q05CG0 | ARID4A protein (Fragment) OS=Homo sapiens GN=ARID4A PE=2 SV=1                                                          | 24.65 | 1 | 7  |  | 56.6 |
|    | P29374 | AT-rich interactive domain-containing protein 4A OS=Homo sapiens GN=ARID4A PE=1 SV=3                                   | 24.65 | 1 | 7  |  | 6.5  |
|    | C9J1W3 | AT-rich interactive domain-containing protein 4A (Fragment) OS=Homo sapiens GN=ARID4A PE=2 SV=1                        | 24.65 | 1 | 7  |  | 6.5  |
| 41 | Q02045 | Myosin light chain 5 OS=Homo sapiens GN=MYL5 PE=2 SV=1                                                                 | 23.73 | 1 | 68 |  | 9.5  |
|    | D6RJ91 | Myosin light chain 5 (Fragment) OS=Homo sapiens GN=MYL5 PE=2 SV=1                                                      | 23.73 | 1 | 68 |  | 9.5  |
|    | D6RA88 | Myosin light chain 5 OS=Homo sapiens GN=MYL5 PE=2 SV=1                                                                 | 23.73 | 1 | 68 |  | 9.5  |
| 42 | Q7Z3Z1 | Myosin light chain 2 OS=Homo sapiens PE=2 SV=1                                                                         | 23.73 | 1 | 14 |  | 6.0  |
|    | Q6IB42 | MYL2 protein OS=Homo sapiens GN=MYL2 PE=2 SV=1                                                                         | 23.73 | 1 | 14 |  | 6.0  |
|    | Q14908 | Cardiac ventricular myosin light chain-2 OS=Homo sapiens PE=2 SV=1                                                     | 23.73 | 1 | 14 |  | 6.0  |
|    | P10916 | Myosin regulatory light chain 2, ventricular/cardiac muscle isoform OS=Homo sapiens GN=MYL2 PE=1 SV=3                  | 23.73 | 1 | 14 |  | 6.0  |
|    | F8VWQ7 | Myosin regulatory light chain 2, ventricular/cardiac muscle isoform (Fragment) OS=Homo sapiens GN=MYL2 PE=2 SV=1       | 23.73 | 1 | 14 |  | 6.0  |
| 43 | Q6MZ0  | Putative uncharacterized protein DKFZp686B12213 (Fragment) OS=Homo sapiens GN=DKFZp686B12213 PE=2 SV=1                 | 20.72 | 1 | 15 |  | 6.0  |
|    | Q13099 | Intraflagellar transport protein 88 homolog OS=Homo sapiens GN=IFT88 PE=2 SV=2                                         | 20.72 | 1 | 15 |  | 6.0  |
|    | F5H6C2 | Intraflagellar transport protein 88 homolog OS=Homo sapiens GN=IFT88 PE=2 SV=1                                         | 20.72 | 1 | 15 |  | 6.0  |
|    | E7EW86 | Intraflagellar transport protein 88 homolog OS=Homo sapiens GN=IFT88 PE=2 SV=1                                         | 20.72 | 1 | 15 |  | 6.0  |
|    | B3KX42 | cDNA FLJ44712 fis, clone BRACE3019941, highly similar to Intraflagellar transport 88 homolog OS=Homo sapiens PE=2 SV=1 | 20.72 | 1 | 15 |  | 6.0  |

Group Nr.

By the rule of parsimony, we have gathered all proteins sharing the same identified peptides into a single group.

Accession Nr.

The accession number from the searched database (DB).

Protein Name

The protein name in the DB.

Protein Score

Sum of the contributing peptide scores.

NOTE: This score can only be used to support the identification of **one** protein per group.  
*Unique PSMs.*

The number of unique peptide-spectrum matches that contribute to the protein assignment.  
*PSM Serial Nrs.*

Sequential number of assigned peptide (in the following table.)  
*Other Grp.*

If the protein is assigned to another group, that (those) group number(s).  
*% Seq. Cover.*

Percent sequence coverage of this protein.

## Assigned Peptides

| #  | Sequence                   | PTM Site                    | Nr. Scans | Mascot Score | Expectation | Isolated Mass | Delta Mass | Charge State | Matched Ions | Scan Nr. |
|----|----------------------------|-----------------------------|-----------|--------------|-------------|---------------|------------|--------------|--------------|----------|
| 1  | R.GYSFVTTAER.E             |                             | 1         | 39.900       | 0.012       | 565.78        | 0.1        | 2            | '7/18        | 2270     |
| 2  | R.FEEELAAR.E               |                             | 1         | 34.550       | 0.047       | 482.74        | 1.7        | 2            | '7/14        | 1776     |
| 3  | R.QCLPCGPGGKGR.C           |                             | 2         | 31.680       | 0.081       | 429.54        | -0.1       | 3            | '7/22        | 1939     |
| 4  | K.CSTSSLLEACTFR.R          |                             | 4         | 99.580       | 5.9e-009    | 766.35        | -1.5       | 2            | '10/24       | 3100     |
| 5  | K.YLGEEYVK.A               |                             | 2         | 31.820       | 0.061       | 500.75        | 0.7        | 2            | '11/14       | 2464     |
| 6  | K.YLGEEYVKAVGNLRK.C        |                             | 4         | 25.160       | 0.34        | 435.49        | -0.1       | 4            | '10/28       | 4035     |
| 7  | K.FYSIAR.K                 |                             | 3         | 24.650       | 0.24        | 378.70        | -15.0      | 2            | '4/10        | 3010     |
| 8  | K.LVTDLTK.V                |                             | 11        | 44.370       | 0.0043      | 395.24        | -0.6       | 2            | '6/12        | 1539     |
| 9  | R.TLIYDTSK.H               |                             | 1         | 26.670       | 0.21        | 506.28        | 11.0       | 2            | '4/16        | 1985     |
| 10 | R.YLYEIAR.R                |                             | 5         | 31.910       | 0.075       | 464.25        | 0.0        | 2            | '6/12        | 2602     |
| 11 | K.TASEMVLADDFSTIVAAVEEGR.A | 0.00001000000000000000000.0 | 2         | 46.170       | 0.0027      | 814.39        | -1.4       | 3            | '22/44       | 4852     |
| 12 | K.EGYGYTGAFR.C             |                             | 2         | 56.700       | 0.0001      | 642.29        | -0.2       | 2            | '8/20        | 2969     |
| 13 | K.SVIPSDGSPVACVK.K         |                             | 6         | 74.760       | 3.9e-006    | 708.36        | 0.4        | 2            | '8/26        | 2338     |
| 14 | K.EAFTIMDQNR.D             | 0.0000010000.0              | 1         | 23.730       | 0.25        | 620.78        | -1.8       | 2            | '5/18        | 1869     |



|    |                                   |                                  |    |        |          |        |      |   |        |      |
|----|-----------------------------------|----------------------------------|----|--------|----------|--------|------|---|--------|------|
| 15 | K.EALRNDSSCTEALYNIGL<br>TYEKLNR.L |                                  | 1  | 20.720 | 1.2      | 489.25 | 9.0  | 6 | '7/48  | 4532 |
| 16 | K.IQVLQQQADDAEER.A                |                                  | 1  | 87.950 | 2.3e-007 | 821.91 | 0.4  | 2 | '9/26  | 2070 |
| 17 | K.DCHLAQVPSHTVVAR.S               |                                  | 8  | 54.680 | 0.00051  | 563.95 | -0.4 | 3 | '11/28 | 2376 |
| 18 | K.SVEEYANCHLAR.A                  |                                  | 2  | 56.270 | 0.00074  | 724.83 | -0.3 | 2 | '9/22  | 2182 |
| 19 | R.SKQLEEDIAAKEK.L                 |                                  | 2  | 21.490 | 1.2      | 496.94 | 2.1  | 3 | '12/24 | 2132 |
| 20 | K.ASYLDCIR.A                      |                                  | 4  | 48.130 | 0.0015   | 499.24 | 2.8  | 2 | '12/14 | 2527 |
| 21 | K.IECVSAETTEDCIAK.I               |                                  | 4  | 77.330 | 9.2e-007 | 863.39 | -0.7 | 2 | '9/28  | 2018 |
| 22 | R.ELTPQVVSAAR.I                   |                                  | 1  | 41.250 | 0.017    | 585.83 | 1.1  | 2 | '7/20  | 2101 |
| 23 | K.VPQVSTPTLVEVSR.N                |                                  | 1  | 52.860 | 0.00049  | 756.43 | 0.2  | 2 | '9/26  | 2906 |
| 24 | R.DDTVCLAK.L                      |                                  | 2  | 35.020 | 0.039    | 461.22 | 0.4  | 2 | '7/14  | 1385 |
| 25 | R.ARQLEEEELR.T                    |                                  | 1  | 20.950 | 2.2      | 381.88 | -0.3 | 3 | '7/16  | 2242 |
| 26 | R.SAGWNIPIGLLYCDLPEP<br>RKPLEK.A  |                                  | 1  | 55.210 | 0.00024  | 692.37 | 4.0  | 4 | '14/46 | 4991 |
| 27 | K.DSGFQMNQLRGK.K                  |                                  | 2  | 28.200 | 0.21     | 460.90 | 1.4  | 3 | '8/22  | 2453 |
| 28 | K.IWHHTFYNELR.V                   |                                  | 4  | 24.350 | 0.48     | 505.92 | -2.4 | 3 | '8/20  | 4315 |
| 29 | K.AVLDLQNK.L                      |                                  | 2  | 34.020 | 0.06     | 450.76 | -0.3 | 2 | '5/14  | 2680 |
| 30 | K.VGAHAGEYGAERALER.M              |                                  | 2  | 57.510 | 0.00018  | 510.58 | -0.1 | 3 | '7/28  | 2950 |
| 31 | R.KCSTSSLLEACTFRFP.-              |                                  | 6  | 37.390 | 0.026    | 638.32 | 0.1  | 3 | '7/30  | 3333 |
| 32 | R.QLEEEELR.T                      |                                  | 1  | 24.190 | 0.6      | 458.74 | -1.0 | 2 | '4/12  | 1670 |
| 33 | K.CDEWSVNSVGK.I                   |                                  | 2  | 65.220 | 1.1e-005 | 640.78 | 0.0  | 2 | '8/20  | 2217 |
| 34 | R.ELEEISERLEEAGGATS<br>VQIEMNK.K  | 0.00000000000000000000<br>0100.0 | 5  | 67.440 | 1.9e-005 | 893.43 | 0.5  | 3 | '17/46 | 3840 |
| 35 | R.GFFYTPK.T                       |                                  | 1  | 28.340 | 0.15     | 430.22 | -0.5 | 2 | '5/12  | 3008 |
| 36 | K.KSASDLTWDNLK.G                  |                                  | 2  | 26.550 | 0.37     | 459.91 | -0.1 | 3 | '12/22 | 2794 |
| 37 | K.SASDLTWDNLK.G                   |                                  | 2  | 65.950 | 3.8e-005 | 625.31 | 1.2  | 2 | '8/20  | 3041 |
| 38 | R.LKCDEWSVNSVGK.I                 |                                  | 4  | 74.770 | 5e-006   | 761.37 | 1.2  | 2 | '19/24 | 2566 |
| 39 | K.CCTESLVNR.R                     |                                  | 1  | 46.630 | 0.00083  | 569.75 | -1.2 | 2 | '7/16  | 1482 |
| 40 | K.TVGMVAGDEESYEVFAD<br>LFDPIK.L   | 0.00010000000000000000<br>0000.0 | 1  | 59.290 | 0.00013  | 883.09 | -0.2 | 3 | '23/46 | 5334 |
| 41 | K.HSTIFENLANK.A                   |                                  | 4  | 68.970 | 2.4e-005 | 637.33 | 0.0  | 2 | '9/20  | 3402 |
| 42 | R.KLVIIESDLER.A                   |                                  | 4  | 34.360 | 0.038    | 657.89 | 3.7  | 2 | '6/20  | 3485 |
| 43 | -.MFLSFPTTK.T                     |                                  | 1  | 23.880 | 0.48     | 536.28 | -0.7 | 2 | '7/16  | 3786 |
| 44 | K.SVIPSDGSPVACVKK.A               |                                  | 6  | 43.190 | 0.0079   | 772.41 | 0.0  | 2 | '7/28  | 2261 |
| 45 | K.CASLQKFGER.A                    |                                  | 2  | 49.980 | 0.0013   | 598.30 | -0.4 | 2 | '7/18  | 2062 |
| 46 | K.SASDLTWDNLKKGK.K                |                                  | 4  | 83.010 | 8e-007   | 717.86 | -0.8 | 2 | '10/24 | 2647 |
| 47 | R.IEANEALVKALE.-                  |                                  | 1  | 57.940 | 0.00031  | 650.36 | 2.9  | 2 | '18/22 | 3636 |
| 48 | K.SDNCEDTPEAGYFAVAV<br>VKK.S      |                                  | 2  | 62.150 | 5.3e-005 | 734.01 | -1.1 | 3 | '19/38 | 3272 |
| 49 | R.WCAVSEHEATK.C                   |                                  | 10 | 57.410 | 0.0001   | 659.30 | 2.6  | 2 | '9/20  | 1756 |
| 50 | R.IEANEALVK.A                     |                                  | 1  | 39.080 | 0.02     | 493.78 | 0.0  | 2 | '8/16  | 1701 |

|    |                                |                          |   |        |          |        |      |   |        |      |
|----|--------------------------------|--------------------------|---|--------|----------|--------|------|---|--------|------|
| 51 | R.EQAEAEVASLNR.R               |                          | 1 | 39.670 | 0.013    | 658.83 | 2.2  | 2 | '8/22  | 1844 |
| 52 | -.SDVLELTDNFSR.I               |                          | 1 | 73.000 | 3.5e-006 | 820.38 | 1.6  | 2 | '9/26  | 3507 |
| 53 | K.KSASDLTWDNLKKGK.K            |                          | 2 | 73.960 | 8.2e-006 | 521.61 | 0.3  | 3 | '10/26 | 2697 |
| 54 | K.KATDAEADVASLNR.R             |                          | 2 | 24.120 | 0.62     | 539.62 | -0.7 | 3 | '8/28  | 2116 |
| 55 | R.CLVEKGDVAFVK.H               |                          | 2 | 63.220 | 0.00011  | 455.58 | -0.1 | 3 | '11/22 | 2973 |
| 56 | R.KCSTSSLLEACTFR.R             |                          | 2 | 35.640 | 0.027    | 553.93 | 2.1  | 3 | '7/26  | 3051 |
| 57 | K.SKEFQLFSSPHGK.D              |                          | 4 | 43.840 | 0.0088   | 497.92 | -1.3 | 3 | '6/24  | 3482 |
| 58 | K.LHDRNTYEKYLGEYVK.A           |                          | 2 | 22.680 | 0.75     | 540.02 | -0.3 | 4 | '9/32  | 3810 |
| 59 | R.EQEITAVQAR.M                 |                          | 1 | 38.790 | 0.021    | 572.80 | 3.8  | 2 | '7/18  | 1452 |
| 60 | R.EGTCPEAPTDECKPVKW.CALSHHER.L |                          | 6 | 25.370 | 0.22     | 749.34 | 1.3  | 4 | '18/48 | 3596 |
| 61 | K.LCYVALDFENEMATAAS.SSSLEK.S   |                          | 3 | 78.030 | 1.1e-006 | 846.06 | -0.4 | 3 | '22/44 | 4704 |
| 62 | K.YLGEYVKAVGNLR.K              |                          | 2 | 21.260 | 1        | 537.62 | 0.5  | 3 | '12/26 | 4192 |
| 63 | K.HIAEDADRKYEEVAR.K            |                          | 2 | 27.720 | 0.2      | 451.22 | -4.0 | 4 | '12/28 | 2533 |
| 64 | R.FDEFFSEGCAPGSKK.D            |                          | 2 | 22.750 | 0.35     | 569.26 | 0.8  | 3 | '11/28 | 3330 |
| 65 | R.IQLVEEELDR.A                 |                          | 6 | 62.070 | 8.9e-005 | 622.33 | 0.2  | 2 | '8/18  | 3000 |
| 66 | R.QAGLNKDPR.C                  |                          | 1 | 33.750 | 0.045    | 499.77 | -9.3 | 2 | '6/16  | 1794 |
| 67 | K.KMMEGK.A                     | 0.011000.0               | 1 | 30.010 | 0.048    | 378.18 | 13.1 | 2 | '5/10  | 2377 |
| 68 | K.EAFTLMDQNR.D                 | 0.0000010000.0           | 1 | 23.730 | 0.25     | 620.78 | -1.8 | 2 | '5/18  | 1869 |
| 69 | K.CLKDGAGDVAFAVK.H             |                          | 2 | 54.850 | 0.00065  | 460.57 | -1.1 | 3 | '19/24 | 2890 |
| 70 | R.GIVEQCCTSICSLYQLEN.YCN.-     |                          | 3 | 72.500 | 9.9e-007 | 871.04 | -0.2 | 3 | '18/40 | 4389 |
| 71 | -.TFQSVESSTR.K                 |                          | 1 | 24.660 | 0.43     | 381.19 | 15.7 | 3 | '4/18  | 2488 |
| 72 | K.DKEACVHKILR.Q                |                          | 4 | 32.260 | 0.069    | 456.92 | 0.4  | 3 | '11/20 | 2830 |
| 73 | R.EGTCPEAPTDECKPVK.W           |                          | 4 | 54.160 | 0.00018  | 909.41 | -0.4 | 2 | '8/30  | 1455 |
| 74 | R.AMSDLELR.Q                   | 0.01000000.0             | 1 | 25.740 | 0.41     | 475.74 | 7.1  | 2 | '6/14  | 1685 |
| 75 | R.DDTVCLAKLHDR.N               |                          | 2 | 38.660 | 0.016    | 481.57 | 0.3  | 3 | '13/22 | 2428 |
| 76 | K.AEADVASLNR.R                 |                          | 1 | 27.220 | 0.27     | 401.21 | -0.1 | 3 | '5/20  | 1574 |
| 77 | R.IEEELGDEAR.F                 |                          | 1 | 53.230 | 0.00032  | 580.78 | 0.0  | 2 | '16/18 | 1570 |
| 78 | R.LELCDER.V                    |                          | 1 | 31.310 | 0.069    | 467.72 | 3.0  | 2 | '6/12  | 1625 |
| 79 | K.HSTIFENLANKADR.D             |                          | 2 | 42.490 | 0.0092   | 539.28 | 1.4  | 3 | '14/26 | 3751 |
| 80 | R.SETKDLLFRDDTVCLAK.L          |                          | 4 | 31.370 | 0.1      | 671.01 | -0.3 | 3 | '10/32 | 3553 |
| 81 | R.SETKDLLFR.D                  |                          | 4 | 37.330 | 0.025    | 554.80 | 0.2  | 2 | '12/16 | 2821 |
| 82 | K.AIMTYVSCFYHAFAGAE.QAETAANR.I | 0.00100000000000000000.0 | 1 | 51.370 | 0.00053  | 932.43 | 4.1  | 3 | '12/48 | 4840 |
| 83 | R.IGCIITAR.K                   |                          | 1 | 25.180 | 0.54     | 452.26 | 2.5  | 2 | '6/14  | 2206 |
| 84 | K.MYLGYEYVTAIR.N               | 0.100000000000.0         | 4 | 70.690 | 1.2e-005 | 747.87 | 3.0  | 2 | '8/22  | 3885 |

|     |                                                   |                                              |    |        |          |             |      |   |        |      |
|-----|---------------------------------------------------|----------------------------------------------|----|--------|----------|-------------|------|---|--------|------|
| 85  | R.MFLSFPTTK.T                                     | 0.100000000.0                                | 2  | 28.670 | 0.17     | 544.28      | -3.1 | 2 | '5/16  | 3579 |
| 86  | K.DGAGDVAFVK.H                                    |                                              | 2  | 67.570 | 2.7e-005 | 489.75      | 0.0  | 2 | '9/18  | 2147 |
| 87  | K.MYLGYEYVTAIRNLR.E                               | 0.1000000000000000.0                         | 10 | 22.980 | 0.75     | 626.66      | -0.1 | 3 | '8/28  | 4586 |
| 88  | R.AMSDLELRQCLPCGPG<br>GKGR.C                      | 0.0100000000000000000.0                      | 1  | 27.530 | 0.18     | 555.27      | -0.9 | 4 | '20/38 | 3201 |
| 89  | K.EKSEFKLEDDVTSNME<br>QIIK.A                      | 0.000000000000000010000<br>0.0               | 1  | 23.600 | 0.5      | 628.82      | 2.0  | 4 | '7/40  | 4180 |
| 90  | R.DGDILGKYVD.-                                    |                                              | 1  | 30.400 | 0.12     | 547.77      | 1.6  | 2 | '6/18  | 3219 |
| 91  | R.LKCDEWSVNSVGKIECV<br>SAETTEDCIAK.I              |                                              | 2  | 27.880 | 0.13     | 807.88      | 0.0  | 4 | '19/54 | 4057 |
| 92  | K.HQTVPQNTGGKNPDPW<br>AK.N                        |                                              | 4  | 36.330 | 0.036    | 659.00      | 0.6  | 3 | '16/34 | 2457 |
| 93  | K.AADAEAEVASLNR.R                                 |                                              | 1  | 40.150 | 0.012    | 658.83      | 2.2  | 2 | '8/24  | 1844 |
| 94  | K.SLQDIIAILGMDELSEED<br>KLTVSR.A                  | 0.00000000001000000000<br>0000.0             | 1  | 49.480 | 0.0015   | 897.80      | -1.5 | 3 | '11/46 | 5351 |
| 95  | K.GITLSVRP.-                                      |                                              | 1  | 34.780 | 0.029    | 421.76      | 0.6  | 2 | '4/14  | 1888 |
| 96  | K.KASYLDCIR.A                                     |                                              | 4  | 44.520 | 0.0042   | 563.29      | -2.0 | 2 | '6/16  | 2579 |
| 97  | R.KPLVIAEDVDGEALSTL<br>VLNR.L                     |                                              | 1  | 33.350 | 0.018    | 789.12      | -1.4 | 3 | '17/42 | 5386 |
| 98  | K.DLLFRDDTVCLAK.L                                 |                                              | 4  | 54.180 | 0.0015   | 783.40      | 1.3  | 2 | '7/24  | 3752 |
| 99  | K.ATDAEADVASLNR.R                                 |                                              | 2  | 26.140 | 0.35     | 496.92      | -1.0 | 3 | '7/26  | 1866 |
| 100 | K.AAWGKVGAHAGEYGAE<br>ALER.M                      |                                              | 1  | 31.230 | 0.11     | 511.51      | -1.1 | 4 | '7/38  | 3996 |
| 101 | R.AQCGGGLLGV.R                                    |                                              | 1  | 64.820 | 5.5e-005 | 544.29      | -0.5 | 2 | '9/20  | 2492 |
| 102 | K.AGFAGDDAPR.A                                    |                                              | 2  | 46.260 | 0.0015   | 488.73      | 0.9  | 2 | '8/18  | 1460 |
| 103 | K.EACVHKILR.Q                                     |                                              | 2  | 27.940 | 0.19     | 375.88      | -0.9 | 3 | '8/16  | 2662 |
| 104 | K.MYLGYEYVTAIRNLR.E                               |                                              | 2  | 23.450 | 0.67     | 621.33      | -0.5 | 3 | '7/28  | 4687 |
| 105 | R.KLVIIESDLERAER.A                                |                                              | 2  | 27.580 | 0.2      | 600.67      | 0.7  | 3 | '7/28  | 3939 |
| 106 | R.QCLPCGPGGK.G                                    |                                              | 1  | 26.930 | 0.097    | 537.25      | 0.7  | 2 | '7/18  | 1511 |
| 107 | M.FLSFPTTK.T                                      |                                              | 1  | 23.050 | 0.41     | 470.76      | 1.2  | 2 | '4/14  | 3119 |
| 108 | R.MFLSFPTTK.T                                     |                                              | 1  | 23.880 | 0.48     | 536.28      | -0.7 | 2 | '7/16  | 3786 |
| 109 | K.KVPQVSTPTLVEVSR.N                               |                                              | 19 | 67.530 | 1.1e-005 | 820.47      | -0.5 | 2 | '12/28 | 2929 |
| 110 | R.IQLVEEELDRAQER.L                                |                                              | 6  | 35.040 | 0.048    | 576.64      | 0.9  | 3 | '7/26  | 3190 |
| 111 | R.NLREGTCPEAPTDECKP<br>VK.W                       |                                              | 2  | 22.220 | 1.7      | 551.01      | 0.8  | 4 | '13/36 | 2314 |
| 112 | K.YDEELEER.L                                      |                                              | 1  | 41.320 | 0.0028   | 541.74      | 0.1  | 2 | '6/14  | 1457 |
| 113 | -.MFLSFPTTK.T                                     | 0.100000000.0                                | 2  | 28.670 | 0.17     | 544.28      | -3.1 | 2 | '5/16  | 3579 |
| 114 | K.EFQLFSSPHGK.D                                   |                                              | 2  | 33.860 | 0.064    | 426.22      | 0.2  | 3 | '6/20  | 3327 |
| 115 | R.SEAPPHIFSISDNAYQYM<br>LTDRENQSILITGESGAGK.<br>T | 0.00000000000000000100<br>0000000000000000.0 | 1  | 27.380 | 0.13     | 1014.7<br>4 | 6.0  | 4 | '6/72  | 4312 |

|     |                                  |                                 |    |        |          |        |      |   |        |      |
|-----|----------------------------------|---------------------------------|----|--------|----------|--------|------|---|--------|------|
| 116 | K.HPNGTQETILLNHTFNET<br>QIEWFR.A |                                 | 1  | 27.890 | 0.19     | 732.11 | 1.9  | 4 | '25/46 | 4829 |
| 117 | K.HIAEDSDRKYEEVAR.K              |                                 | 1  | 27.300 | 0.27     | 455.23 | 4.7  | 4 | '14/28 | 2315 |
| 118 | K.CSTSSLLEACTFRRP.-              |                                 | 10 | 36.680 | 0.024    | 595.62 | -1.5 | 3 | '8/28  | 3341 |
| 119 | K.LCYVALDFENEMATAAS<br>SSSLEK.S  | 0.00000000000100000000<br>000.0 | 7  | 78.570 | 8.3e-007 | 851.39 | -2.1 | 3 | '22/44 | 4247 |
| 120 | K.SIDDLLEEK.V                    |                                 | 2  | 41.260 | 0.014    | 474.73 | 0.4  | 2 | '11/14 | 1591 |
| 121 | -.KVTYTSQEDLVEKK.C               |                                 | 1  | 60.030 | 0.00013  | 556.63 | -1.3 | 3 | '10/26 | 1984 |
| 122 | K.DSGFQMNQLR.G                   |                                 | 2  | 55.380 | 0.0003   | 598.28 | 4.3  | 2 | '9/18  | 2581 |
| 123 | K.SVIPSDGSPVACVKKAS<br>YLDCIR.A  |                                 | 4  | 26.680 | 0.3      | 631.32 | -0.6 | 4 | '17/44 | 3827 |
| 124 | K.GHMLADVVAIGTQDIVF<br>GEVDR.-   | 0.00100000000000000000<br>000.0 | 1  | 43.400 | 0.0068   | 824.42 | -3.2 | 3 | '17/44 | 5288 |

#

Serial (sequential) number for peptide.

*Sequence*

Assigned peptide sequence. Periods (".") delimit the sequence for internal peptides.

*PTM Site*

Location of the post-translational modification (PTM) in the peptide.

Modification codes: [1] Oxidation (M)

*Nr. Scans*

The number of MS/MS scans that were matched to this peptide.

*Mascot Score*

Score given to this peptide/spectrum match by Mascot.

*Expectation*

The number of matches with equal or better scores that are expected to occur by chance alone.

*Isolated Mass*

"Mass" in the Orbitrap analyzer.

*Delta Mass*

Difference between the observed and theoretical masses, in ppm.

*Charge State*

Inferred ionic state of the peptide.

*Matched Ions*

Number of matched MS/MS ions, as reported by Mascot.  
*Scan Nr.*

MS/MS scan number in the original Xcalibur RAW file.
