# Supplementary material
Source: PubMed Central journal article supplement (PMC4349970)
Supplement: supp_M114.039909_mcp.M114.039909-6.pdf [file supp_M114.039909_mcp.M114.039909-6.pdf]

## S1

| N | Unused | Total | %Cov(95)  | Accession         |
|---|--------|-------|-----------|-------------------|
| 1 | 57.83  | 57.83 | 41.4      | IPI:IPI00022463.1 |
| 2 | 8.06   | 8.06  | 8.2170002 | IPI:IPI00021304.1 |
| 3 | 4.97   | 6.99  | 5.28      | IPI:IPI00220327.4 |
| 4 | 3.86   | 3.86  | 4.0130001 | IPI:IPI00019359.4 |
| 5 | 3.75   | 3.75  | 2.568     | IPI:IPI00009865.4 |

## S2

| N | Unused | Total  | %Cov(95)  | Accession         |
|---|--------|--------|-----------|-------------------|
| 1 | 137.69 | 137.69 | 70.630002 | IPI:IPI00022463.1 |
| 2 | 2      | 2      | 1.863     | IPI:IPI00220327.4 |

## S3

| N | Unused | Total | %Cov(95)  | Accession         |
|---|--------|-------|-----------|-------------------|
| 1 | 54.82  | 54.82 | 50.72     | IPI:IPI00022463.1 |
| 2 | 30.43  | 30.43 | 19.88     | IPI:IPI00220327.4 |
| 3 | 29.04  | 29.04 | 30.649999 | IPI:IPI00009865.4 |
| 4 | 13.03  | 13.03 | 20.13     | IPI:IPI00022488.1 |
| 5 | 12.87  | 12.87 | 8.4530003 | IPI:IPI00022434.4 |
| 5 | 0.01   | 12.78 | 10.13     | IPI:IPI00908876.1 |
| 5 | 0      | 12.87 | 8.7750003 | IPI:IPI00966829.1 |
| 5 | 0      | 12.87 | 8.7030001 | IPI:IPI00745872.2 |
| 5 | 0      | 12.77 | 10.73     | IPI:IPI00878517.1 |
| 5 | 0      | 11.06 | 12.710001 | IPI:IPI00953582.1 |
| 5 | 0      | 11.06 | 12.710001 | IPI:IPI00384697.2 |
| 6 | 8.25   | 13.35 | 11.32     | IPI:IPI00021304.1 |
| 7 | 5.93   | 5.93  | 6.4209998 | IPI:IPI00019359.4 |
| 8 | 3.7    | 11.21 | 9.3970001 | IPI:IPI00293665.9 |
| 8 | 1.15   | 8.26  | 5.2540001 | IPI:IPI00009867.3 |
| 8 | 0      | 9.21  | 7.9340003 | IPI:IPI00956313.1 |
| 8 | 0      | 9.21  | 7.9340003 | IPI:IPI00942257.1 |
| 8 | 0      | 9.21  | 8.0370001 | IPI:IPI00909059.5 |
| 8 | 0      | 9.21  | 7.6240003 | IPI:IPI00300725.7 |
| 8 | 0      | 9.21  | 7.6240003 | IPI:IPI00299145.9 |
| 8 | 0      | 8.76  | 7.6240003 | IPI:IPI00930073.1 |
| 8 | 0      | 8.26  | 5.4669999 | IPI:IPI00796776.1 |
| 8 | 0      | 4.86  | 4.183     | IPI:IPI00910738.1 |

## S4

| N | Unused | Total | %Cov(95)  | Accession         |
|---|--------|-------|-----------|-------------------|
| 1 | 38.03  | 38.03 | 26.499999 | IPI:IPI00022463.1 |
| 2 | 13.64  | 13.64 | 8.6960003 | IPI:IPI00220327.4 |
| 3 | 9.35   | 9.35  | 8.0260001 | IPI:IPI00019359.4 |
| 4 | 7.95   | 7.95  | 8.0480002 | IPI:IPI00009865.4 |
| 5 | 3.47   | 5.97  | 4.0309999 | IPI:IPI00021304.1 |
| 6 | 2.52   | 2.52  | 2.483     | IPI:IPI00966829.1 |
| 6 | 0      | 2.52  | 2.4630001 | IPI:IPI00745872.2 |
| 6 | 0      | 2.52  | 2.392     | IPI:IPI00022434.4 |

|   |      |      |           |                   |
|---|------|------|-----------|-------------------|
| 6 | 0    | 2.47 | 3.788     | IPI:IPI00216773.4 |
| 6 | 0    | 2.43 | 2.868     | IPI:IPI00908876.1 |
| 6 | 0    | 2.43 | 3.036     | IPI:IPI00878517.1 |
| 6 | 0    | 2.4  | 3.5969999 | IPI:IPI00953582.1 |
| 6 | 0    | 2.4  | 3.5969999 | IPI:IPI00384697.2 |
| 6 | 0    | 2.38 | 3.3039998 | IPI:IPI00965913.1 |
| 6 | 0    | 2.38 | 3.2680001 | IPI:IPI00965074.1 |
| 7 | 2.51 | 2.51 | 2.165     | IPI:IPI00022488.1 |
| 7 | 0    | 2    | 7.0419997 | IPI:IPI00922564.1 |
| 8 | 1.7  | 2.38 | 1.9069999 | IPI:IPI00384444.6 |
| 8 | 0    | 2.38 | 1.9029999 | IPI:IPI00217963.3 |
| 8 | 0    | 2.19 | 3.5160001 | IPI:IPI00789750.1 |
| 8 | 0    | 2.02 | 2.3940001 | IPI:IPI00791852.1 |
| 8 | 0    | 2.02 | 2.083     | IPI:IPI00450768.7 |
| 8 | 0    | 2.02 | 3.1909999 | IPI:IPI00791156.1 |
| 8 | 0    | 2.01 | 1.9780001 | IPI:IPI00873598.2 |
| 8 | 0    | 2.01 | 1.974     | IPI:IPI00290077.2 |
| 8 | 0    | 2.01 | 4.5919999 | IPI:IPI00794644.1 |
| 8 | 0    | 2.01 | 2.2500001 | IPI:IPI00479145.2 |
| 8 | 0    | 2.01 | 6.6670001 | IPI:IPI00789536.1 |
| 8 | 0    | 1.9  | 3.8139999 | IPI:IPI00879511.1 |
| 8 | 0    | 1.9  | 2.079     | IPI:IPI00798387.1 |
| 8 | 0    | 1.9  | 2.059     | IPI:IPI00240503.7 |
| 8 | 0    | 1.9  | 2.0409999 | IPI:IPI00180956.6 |
| 8 | 0    | 1.81 | 1.599     | IPI:IPI00789324.3 |
| 8 | 0    | 1.81 | 5.0560001 | IPI:IPI00873994.1 |
| 8 | 0    | 1.7  | 3.0929999 | IPI:IPI00797326.1 |
| 8 | 0    | 1.7  | 3.4480002 | IPI:IPI00792454.1 |
| 8 | 0    | 1.7  | 4.0910002 | IPI:IPI00788699.3 |
| 8 | 0    | 1.7  | 4.0180001 | IPI:IPI00790191.1 |
| 9 | 1.38 | 1.38 | 2.5420001 | IPI:IPI00645363.2 |
| 9 | 0    | 1.38 | 4.0679999 | IPI:IPI00892671.1 |
| 9 | 0    | 1.38 | 2.5420001 | IPI:IPI00876888.1 |
| 9 | 0    | 1.38 | 2.575     | IPI:IPI00816314.1 |
| 9 | 0    | 1.38 | 2.581     | IPI:IPI00785084.2 |
| 9 | 0    | 1.38 | 2.526     | IPI:IPI00784842.1 |
| 9 | 0    | 1.38 | 2.526     | IPI:IPI00784817.1 |
| 9 | 0    | 1.38 | 3.008     | IPI:IPI00448925.6 |
| 9 | 0    | 1.38 | 2.495     | IPI:IPI00423466.1 |
| 9 | 0    | 1.38 | 2.526     | IPI:IPI00423464.1 |
| 9 | 0    | 1.38 | 2.5       | IPI:IPI00423463.1 |
| 9 | 0    | 1.38 | 2.4900001 | IPI:IPI00384938.1 |
| 9 | 0    | 1.38 | 2.537     | IPI:IPI00930124.1 |

S5

| N | Unused | Total | %Cov(95)  | Accession         |
|---|--------|-------|-----------|-------------------|
| 1 | 8.34   | 8.34  | 6.0169999 | IPI:IPI00022463.1 |
| 2 | 6.35   | 6.35  | 11.35     | IPI:IPI00940343.1 |
| 2 | 0      | 6.35  | 13.03     | IPI:IPI00000230.6 |

|   |      |      |           |                   |
|---|------|------|-----------|-------------------|
| 2 | 0    | 6.33 | 11.67     | IPI:IPI00940084.1 |
| 2 | 0    | 6.3  | 13.03     | IPI:IPI00604537.2 |
| 2 | 0    | 6.28 | 13.03     | IPI:IPI00216135.1 |
| 2 | 0    | 5.83 | 13.03     | IPI:IPI00915324.1 |
| 2 | 0    | 5.78 | 13.03     | IPI:IPI00941861.1 |
| 2 | 0    | 5.78 | 13.03     | IPI:IPI00014581.1 |
| 2 | 0    | 5.76 | 13.03     | IPI:IPI00296039.7 |
| 2 | 0    | 4.78 | 7.6609999 | IPI:IPI00921977.1 |
| 2 | 0    | 4.76 | 8.3329998 | IPI:IPI00745267.2 |
| 2 | 0    | 4.76 | 7.6609999 | IPI:IPI00216134.3 |
| 2 | 0    | 4.76 | 7.8189999 | IPI:IPI00018853.1 |
| 3 | 3.64 | 3.64 | 2.483     | IPI:IPI00966829.1 |
| 3 | 0    | 3.64 | 2.4630001 | IPI:IPI00745872.2 |
| 3 | 0    | 3.64 | 2.392     | IPI:IPI00022434.4 |
| 3 | 0    | 3.54 | 3.788     | IPI:IPI00216773.4 |
| 3 | 0    | 2.88 | 2.868     | IPI:IPI00908876.1 |
| 3 | 0    | 2.88 | 3.036     | IPI:IPI00878517.1 |
| 3 | 0    | 2.83 | 3.5969999 | IPI:IPI00953582.1 |
| 3 | 0    | 2.83 | 3.5969999 | IPI:IPI00384697.2 |
| 3 | 0    | 2.12 | 3.3039998 | IPI:IPI00965913.1 |
| 3 | 0    | 2.12 | 3.2680001 | IPI:IPI00965074.1 |
| 4 | 3.32 | 3.32 | 1.863     | IPI:IPI00220327.4 |
| 5 | 2.98 | 2.98 | 2.568     | IPI:IPI00019359.4 |

#### S6

| N | Unused | Total | %Cov(95)  | Accession          |
|---|--------|-------|-----------|--------------------|
| 1 | 14.11  | 14.11 | 12.09     | IPI:IPI00021304.1  |
| 2 | 13.82  | 13.82 | 9.3120001 | IPI:IPI00022463.1  |
| 3 | 10.77  | 10.77 | 8.7329999 | IPI:IPI00009865.4  |
| 4 | 9.98   | 13.09 | 7.1429998 | IPI:IPI00220327.4  |
| 5 | 8.72   | 8.75  | 5.9390001 | IPI:IPI00019359.4  |
| 6 | 4.64   | 4.64  | 2.483     | IPI:IPI00966829.1  |
| 6 | 0      | 4.64  | 2.4630001 | IPI:IPI00745872.2  |
| 6 | 0      | 4.64  | 2.392     | IPI:IPI00022434.4  |
| 6 | 0      | 4.63  | 3.3039998 | IPI:IPI00965913.1  |
| 6 | 0      | 4.63  | 3.2680001 | IPI:IPI00965074.1  |
| 6 | 0      | 4.63  | 2.868     | IPI:IPI00908876.1  |
| 6 | 0      | 4.63  | 3.036     | IPI:IPI00878517.1  |
| 6 | 0      | 4.61  | 3.788     | IPI:IPI00216773.4  |
| 6 | 0      | 4.6   | 3.5969999 | IPI:IPI00953582.1  |
| 6 | 0      | 4.6   | 3.5969999 | IPI:IPI00384697.2  |
| 7 | 1.58   | 1.58  | 0         | IPI:IPI00964913.1  |
| 7 | 0      | 1.58  | 0         | IPI:IPI00872379.1  |
| 7 | 0      | 1.58  | 0         | IPI:IPI00329801.12 |

#### S7

| N | Unused | Total | %Cov(95) | Accession         |
|---|--------|-------|----------|-------------------|
| 1 | 20.66  | 20.66 | 14.44    | IPI:IPI00220327.4 |
| 2 | 14.76  | 14.76 | 10.45    | IPI:IPI00009865.4 |

|   |       |       |           |                   |
|---|-------|-------|-----------|-------------------|
| 3 | 11.94 | 11.94 | 6.16      | IPI:IPI00022463.1 |
| 4 | 11.27 | 15.92 | 13.49     | IPI:IPI00021304.1 |
| 5 | 2.89  | 2.89  | 3.0300001 | IPI:IPI00956314.2 |
| 5 | 0.21  | 2.11  | 3.4329999 | IPI:IPI00829640.1 |
| 5 | 0     | 2.89  | 3.39      | IPI:IPI00887169.2 |
| 5 | 0     | 2.89  | 3.39      | IPI:IPI00744476.6 |
| 5 | 0     | 2.89  | 3.39      | IPI:IPI00719452.1 |
| 5 | 0     | 2.89  | 3.39      | IPI:IPI00658130.1 |
| 5 | 0     | 1.91  | 7.9999998 | IPI:IPI00965841.1 |
| 5 | 0     | 1.91  | 7.1429998 | IPI:IPI00386840.1 |
| 5 | 0     | 1.91  | 7.2070003 | IPI:IPI00382431.1 |
| 5 | 0     | 1.91  | 6.8379998 | IPI:IPI00956687.1 |
| 5 | 0     | 1.91  | 7.4069999 | IPI:IPI00956602.1 |
| 5 | 0     | 1.91  | 8.0810003 | IPI:IPI00956482.1 |
| 5 | 0     | 1.91  | 6.6119999 | IPI:IPI00939844.2 |
| 5 | 0     | 1.91  | 7.2070003 | IPI:IPI00828149.1 |
| 5 | 0     | 1.91  | 7.1429998 | IPI:IPI00828048.1 |
| 5 | 0     | 1.91  | 7.1429998 | IPI:IPI00827815.1 |
| 5 | 0     | 1.91  | 6.6670001 | IPI:IPI00553215.3 |
| 5 | 0     | 1.91  | 6.8970002 | IPI:IPI00386839.1 |
| 5 | 0     | 1.91  | 7.1429998 | IPI:IPI00386574.1 |
| 5 | 0     | 1.91  | 7.2070003 | IPI:IPI00386135.1 |
| 5 | 0     | 1.91  | 7.339     | IPI:IPI00385254.1 |
| 5 | 0     | 1.91  | 7.2729997 | IPI:IPI00383016.1 |
| 5 | 0     | 1.91  | 7.1429998 | IPI:IPI00382447.1 |
| 5 | 0     | 1.91  | 7.2070003 | IPI:IPI00382434.1 |
| 5 | 0     | 1.91  | 7.2070003 | IPI:IPI00382427.1 |
| 5 | 0     | 1.91  | 7.2070003 | IPI:IPI00382426.1 |
| 5 | 0     | 1.91  | 7.1429998 | IPI:IPI00382420.1 |
| 5 | 0     | 1.91  | 7.339     | IPI:IPI00003947.1 |
| 6 | 2.04  | 2.04  | 2.483     | IPI:IPI00966829.1 |
| 6 | 0     | 2.04  | 2.4630001 | IPI:IPI00745872.2 |
| 6 | 0     | 2.04  | 2.392     | IPI:IPI00022434.4 |
| 6 | 0     | 2.04  | 3.3039998 | IPI:IPI00965913.1 |
| 6 | 0     | 2.04  | 3.2680001 | IPI:IPI00965074.1 |
| 6 | 0     | 2.04  | 2.868     | IPI:IPI00908876.1 |
| 6 | 0     | 2.04  | 3.036     | IPI:IPI00878517.1 |
| 6 | 0     | 2.02  | 3.5969999 | IPI:IPI00953582.1 |
| 6 | 0     | 2.02  | 3.5969999 | IPI:IPI00384697.2 |
| 6 | 0     | 2.01  | 3.788     | IPI:IPI00216773.4 |
| 7 | 2.01  | 2.01  | 1.445     | IPI:IPI00019359.4 |

S8

| N | Unused | Total | %Cov(95)  | Accession         |
|---|--------|-------|-----------|-------------------|
| 1 | 12.53  | 12.53 | 8.23      | IPI:IPI00220327.4 |
| 2 | 8.46   | 8.46  | 8.0260001 | IPI:IPI00019359.4 |
| 3 | 5.5    | 5.5   | 2.8650001 | IPI:IPI00022463.1 |
| 4 | 1.96   | 1.97  | 0         | IPI:IPI00009865.4 |

S9

| N  | Unused | Total | %Cov(95)  | Accession         |
|----|--------|-------|-----------|-------------------|
| 1  | 72.55  | 72.55 | 17.26     | IPI:IPI00943563.1 |
| 1  | 0      | 72.55 | 16.9      | IPI:IPI00900293.1 |
| 1  | 0      | 72.55 | 17.17     | IPI:IPI00477536.3 |
| 1  | 0      | 72.55 | 17.1      | IPI:IPI00289334.2 |
| 1  | 0      | 72.46 | 18.47     | IPI:IPI00945610.1 |
| 1  | 0      | 72.46 | 18.37     | IPI:IPI00940093.2 |
| 2  | 22.39  | 22.39 | 14.6      | IPI:IPI00220327.4 |
| 3  | 19.28  | 19.28 | 1.815     | IPI:IPI00014898.3 |
| 3  | 0      | 19.27 | 1.8750001 | IPI:IPI00398775.3 |
| 3  | 0      | 19.27 | 1.86      | IPI:IPI00398002.6 |
| 3  | 0      | 19.27 | 1.8780001 | IPI:IPI00420096.4 |
| 3  | 0      | 19.27 | 1.8689999 | IPI:IPI00398779.5 |
| 3  | 0      | 19.27 | 1.8680001 | IPI:IPI00398778.3 |
| 3  | 0      | 19.27 | 1.8689999 | IPI:IPI00398777.3 |
| 3  | 0      | 19.27 | 1.8829999 | IPI:IPI00398776.3 |
| 3  | 0      | 19.27 | 1.8580001 | IPI:IPI00186711.4 |
| 4  | 18.9   | 18.9  | 4.2610001 | IPI:IPI00026781.3 |
| 5  | 15.95  | 15.95 | 11.17     | IPI:IPI00022463.1 |
| 6  | 11.24  | 11.24 | 9.0750001 | IPI:IPI00009865.4 |
| 7  | 7.53   | 7.54  | 6.4209998 | IPI:IPI00019359.4 |
| 8  | 7.26   | 10.89 | 6.9770001 | IPI:IPI00021304.1 |
| 9  | 5.62   | 5.62  | 1.173     | IPI:IPI00873210.1 |
| 9  | 0      | 5.62  | 1.13      | IPI:IPI00855785.1 |
| 9  | 0      | 5.62  | 1.157     | IPI:IPI00845263.1 |
| 9  | 0      | 5.62  | 1.174     | IPI:IPI00339319.1 |
| 9  | 0      | 5.62  | 1.145     | IPI:IPI00339227.4 |
| 9  | 0      | 5.62  | 1.282     | IPI:IPI00339226.1 |
| 9  | 0      | 5.62  | 1.266     | IPI:IPI00339225.1 |
| 9  | 0      | 5.62  | 1.202     | IPI:IPI00339224.2 |
| 9  | 0      | 5.62  | 1.189     | IPI:IPI00339223.1 |
| 9  | 0      | 5.62  | 1.174     | IPI:IPI00022418.1 |
| 9  | 0      | 3.62  | 0.6617    | IPI:IPI00867588.1 |
| 9  | 0      | 3.62  | 0.6623    | IPI:IPI00855777.1 |
| 9  | 0      | 3.62  | 0.6696    | IPI:IPI00479723.4 |
| 9  | 0      | 3.62  | 0.6696    | IPI:IPI00414283.6 |
| 9  | 0      | 3.62  | 0.6533    | IPI:IPI00339228.1 |
| 10 | 5.51   | 5.51  | 1.377     | IPI:IPI00298994.6 |
| 11 | 5.29   | 5.29  | 0.5371    | IPI:IPI00786995.1 |
| 11 | 0      | 5.29  | 0.537     | IPI:IPI00376215.2 |
| 11 | 0      | 5.29  | 0.5329    | IPI:IPI00296337.2 |
| 12 | 4.39   | 4.39  | 0.4283    | IPI:IPI00007928.4 |
| 13 | 3.59   | 3.59  | 3.7769999 | IPI:IPI00745872.2 |
| 13 | 0      | 3.59  | 4.3979999 | IPI:IPI00908876.1 |
| 13 | 0      | 3.59  | 5.0659999 | IPI:IPI00965913.1 |
| 13 | 0      | 3.59  | 5.0110001 | IPI:IPI00965074.1 |
| 13 | 0      | 3.59  | 4.6560001 | IPI:IPI00878517.1 |
| 13 | 0      | 3.55  | 3.8079999 | IPI:IPI00966829.1 |

|    |      |      |           |                   |
|----|------|------|-----------|-------------------|
| 13 | 0    | 3.55 | 3.6680002 | IPI:IPI00022434.4 |
| 13 | 0    | 3.34 | 5.5160001 | IPI:IPI00953582.1 |
| 13 | 0    | 3.34 | 5.5160001 | IPI:IPI00384697.2 |
| 13 | 0    | 3.33 | 5.8079999 | IPI:IPI00216773.4 |
| 14 | 3.3  | 3.3  | 0.5131    | IPI:IPI00783931.3 |
| 14 | 0    | 3.3  | 0.6721    | IPI:IPI00414694.3 |
| 14 | 0    | 3.3  | 0.5925    | IPI:IPI00022822.5 |
| 14 | 0    | 3.28 | 1.31      | IPI:IPI00479309.6 |
| 14 | 0    | 3.27 | 3.4480002 | IPI:IPI00828004.1 |
| 14 | 0    | 3.27 | 3.2140002 | IPI:IPI00796842.1 |
| 15 | 2.88 | 2.88 | 0.4441    | IPI:IPI00879810.1 |
| 15 | 0    | 2.88 | 0.4441    | IPI:IPI00871535.1 |
| 15 | 0    | 2.88 | 0.445     | IPI:IPI00844215.1 |
| 15 | 0    | 2.88 | 0.4486    | IPI:IPI00843765.1 |
| 16 | 1.54 | 1.54 | 0         | IPI:IPI00220213.2 |
| 16 | 0    | 1.54 | 0         | IPI:IPI00031008.2 |
| 16 | 0    | 1.54 | 0         | IPI:IPI00867560.2 |

S10

| N  | Unused | Total | %Cov(95)  | Accession         |
|----|--------|-------|-----------|-------------------|
| 1  | 32.18  | 32.18 | 34.419999 | IPI:IPI00021304.1 |
| 2  | 23.45  | 27.54 | 26.550001 | IPI:IPI00220327.4 |
| 3  | 18.12  | 18.12 | 18.619999 | IPI:IPI00019359.4 |
| 4  | 15.25  | 15.26 | 10.96     | IPI:IPI00009865.4 |
| 5  | 13.31  | 13.31 | 2.9549999 | IPI:IPI00007928.4 |
| 6  | 10.89  | 10.89 | 9.9299997 | IPI:IPI00398625.5 |
| 7  | 10.31  | 10.31 | 2.6690001 | IPI:IPI00420014.2 |
| 7  | 0      | 9.08  | 3.3530001 | IPI:IPI00740142.2 |
| 8  | 10.26  | 10.26 | 6.0169999 | IPI:IPI00022463.1 |
| 9  | 7.19   | 7.19  | 2.0919999 | IPI:IPI00019502.3 |
| 10 | 2.13   | 2.13  | 2.392     | IPI:IPI00022434.4 |
| 10 | 0      | 2.13  | 2.483     | IPI:IPI00966829.1 |
| 10 | 0      | 2.13  | 2.4630001 | IPI:IPI00745872.2 |
| 10 | 0      | 2.12  | 3.3039998 | IPI:IPI00965913.1 |
| 10 | 0      | 2.12  | 3.2680001 | IPI:IPI00965074.1 |
| 10 | 0      | 2.12  | 2.868     | IPI:IPI00908876.1 |
| 10 | 0      | 2.12  | 3.036     | IPI:IPI00878517.1 |
| 10 | 0      | 2.09  | 3.5969999 | IPI:IPI00953582.1 |
| 10 | 0      | 2.09  | 3.5969999 | IPI:IPI00384697.2 |
| 10 | 0      | 2.09  | 3.788     | IPI:IPI00216773.4 |
| 11 | 2      | 2     | 0.8015    | IPI:IPI00872028.2 |
| 11 | 0      | 2     | 0.8038    | IPI:IPI00292771.4 |
| 11 | 0      | 2     | 0.8091    | IPI:IPI00006196.3 |
| 12 | 1.79   | 5.57  | 3.39      | IPI:IPI00009867.3 |

S11

| N | Unused | Total | %Cov(95)  | Accession         |
|---|--------|-------|-----------|-------------------|
| 1 | 65.19  | 65.19 | 50.86     | IPI:IPI00022463.1 |
| 2 | 42.82  | 42.82 | 17.209999 | IPI:IPI00455383.4 |

|    |       |       |           |                   |
|----|-------|-------|-----------|-------------------|
| 2  | 0     | 42.82 | 16.84     | IPI:IPI00024067.4 |
| 3  | 22.99 | 22.99 | 6.543     | IPI:IPI00333015.7 |
| 3  | 0     | 22.99 | 6.504     | IPI:IPI00328230.2 |
| 3  | 0     | 22.99 | 5.9640002 | IPI:IPI00005614.6 |
| 4  | 19.21 | 19.21 | 7.604     | IPI:IPI00009342.1 |
| 5  | 11.8  | 11.8  | 26.190001 | IPI:IPI00549248.4 |
| 5  | 0     | 11.17 | 29.730001 | IPI:IPI00658013.1 |
| 5  | 0     | 9.8   | 23.4      | IPI:IPI00220740.1 |
| 6  | 7.69  | 7.69  | 2.4289999 | IPI:IPI00026781.3 |
| 7  | 7.06  | 7.06  | 3.5909999 | IPI:IPI00384542.4 |
| 7  | 0     | 7.06  | 3.2079998 | IPI:IPI00026944.3 |
| 8  | 6.61  | 6.61  | 2.747     | IPI:IPI00955436.1 |
| 8  | 0     | 6.61  | 2.5450001 | IPI:IPI00028908.4 |
| 8  | 0     | 6.58  | 2.966     | IPI:IPI00745450.1 |
| 9  | 6.21  | 6.21  | 2.83      | IPI:IPI00936125.2 |
| 9  | 0     | 6.21  | 2.83      | IPI:IPI00852685.1 |
| 9  | 0     | 6.21  | 2.885     | IPI:IPI00936881.1 |
| 9  | 0     | 6.21  | 2.85      | IPI:IPI00935307.1 |
| 9  | 0     | 6.21  | 2.857     | IPI:IPI00924442.1 |
| 9  | 0     | 6.21  | 2.885     | IPI:IPI00884341.2 |
| 10 | 6.15  | 6.15  | 2.122     | IPI:IPI00941371.1 |
| 10 | 0     | 6.15  | 1.542     | IPI:IPI00217709.1 |
| 10 | 0     | 6.15  | 1.538     | IPI:IPI00027280.2 |
| 10 | 0     | 6.15  | 2.063     | IPI:IPI00926528.1 |
| 10 | 0     | 6.15  | 2.1740001 | IPI:IPI00925477.1 |
| 11 | 5.9   | 5.9   | 3.4159999 | IPI:IPI00220327.4 |
| 12 | 5.47  | 5.47  | 2.365     | IPI:IPI00927720.1 |
| 12 | 0     | 5.47  | 2.275     | IPI:IPI00465038.3 |
| 12 | 0     | 5.47  | 2.314     | IPI:IPI00023824.3 |
| 12 | 0     | 4.03  | 5.3739998 | IPI:IPI00789451.4 |
| 13 | 4.99  | 4.99  | 2.6760001 | IPI:IPI00291939.1 |
| 14 | 4.78  | 4.78  | 4.47      | IPI:IPI00966829.1 |
| 14 | 0     | 4.78  | 5.1630002 | IPI:IPI00908876.1 |
| 14 | 0     | 4.78  | 4.4330001 | IPI:IPI00745872.2 |
| 14 | 0     | 4.78  | 4.3060001 | IPI:IPI00022434.4 |
| 14 | 0     | 4.78  | 5.466     | IPI:IPI00878517.1 |
| 14 | 0     | 4.59  | 6.4750001 | IPI:IPI00953582.1 |
| 14 | 0     | 4.59  | 6.4750001 | IPI:IPI00384697.2 |
| 14 | 0     | 4.49  | 5.9470002 | IPI:IPI00965913.1 |
| 14 | 0     | 4.49  | 5.8820002 | IPI:IPI00965074.1 |
| 15 | 4.25  | 4.25  | 9.7400002 | IPI:IPI00022488.1 |
| 16 | 3.4   | 3.71  | 4.555     | IPI:IPI00554648.3 |
| 16 | 0     | 3.4   | 4.9660001 | IPI:IPI00787323.2 |
| 16 | 0     | 3.4   | 4.4089999 | IPI:IPI00017870.1 |
| 16 | 0     | 3.4   | 9.2830002 | IPI:IPI00793917.1 |
| 16 | 0     | 2.31  | 5.714     | IPI:IPI00792642.1 |
| 16 | 0     | 2.31  | 10        | IPI:IPI00793202.1 |
| 16 | 0     | 2     | 8.1079997 | IPI:IPI00795725.1 |
| 16 | 0     | 2     | 6.0910001 | IPI:IPI00396004.3 |

|    |      |      |           |                   |
|----|------|------|-----------|-------------------|
| 17 | 3.3  | 3.3  | 2.8890001 | IPI:IPI00019359.4 |
| 18 | 3.04 | 3.04 | 0.9106    | IPI:IPI00783390.2 |
| 18 | 0    | 3.04 | 0.8987    | IPI:IPI00299059.6 |
| 18 | 0    | 1.52 | 11.46     | IPI:IPI00927924.1 |
| 18 | 0    | 1.52 | 6.0770001 | IPI:IPI00925181.1 |
| 18 | 0    | 1.52 | 12.94     | IPI:IPI00924980.1 |
| 18 | 0    | 1.52 | 8.6609997 | IPI:IPI00794030.1 |
| 19 | 2.54 | 4.34 | 1.286     | IPI:IPI00953508.1 |
| 19 | 0    | 4.34 | 1.285     | IPI:IPI00414101.4 |
| 19 | 0    | 4.34 | 1.241     | IPI:IPI00953043.1 |
| 19 | 0    | 4.34 | 1.241     | IPI:IPI00879004.1 |
| 19 | 0    | 4.34 | 1.276     | IPI:IPI00478232.3 |
| 19 | 0    | 4.34 | 1.276     | IPI:IPI00218753.1 |
| 19 | 0    | 4.34 | 1.241     | IPI:IPI00942088.2 |
| 20 | 2.24 | 2.24 | 1.366     | IPI:IPI00549205.1 |
| 20 | 0    | 2.24 | 1.372     | IPI:IPI00305282.2 |
| 20 | 0    | 2.24 | 1.535     | IPI:IPI00107531.1 |
| 20 | 0    | 2    | 2.727     | IPI:IPI00658205.1 |
| 21 | 2.02 | 2.02 | 4.6009999 | IPI:IPI00166768.3 |
| 21 | 0    | 2.02 | 3.3259999 | IPI:IPI00930688.1 |
| 21 | 0    | 2.02 | 8.523     | IPI:IPI00795002.1 |
| 21 | 0    | 2.02 | 3.6060002 | IPI:IPI00792677.1 |
| 21 | 0    | 2.02 | 5.8370002 | IPI:IPI00478908.3 |
| 21 | 0    | 2.02 | 2.8899999 | IPI:IPI00387144.5 |
| 21 | 0    | 2.02 | 3.3410002 | IPI:IPI00218343.4 |
| 21 | 0    | 2.02 | 3.3259999 | IPI:IPI00180675.4 |
| 21 | 0    | 2    | 8.2419999 | IPI:IPI00909762.1 |
| 21 | 0    | 2    | 4.4780001 | IPI:IPI00793930.1 |
| 22 | 2    | 2    | 0.7671    | IPI:IPI00879810.1 |
| 22 | 0    | 2    | 0.7671    | IPI:IPI00871535.1 |
| 22 | 0    | 2    | 0.7686    | IPI:IPI00844215.1 |
| 22 | 0    | 2    | 0.7749    | IPI:IPI00843765.1 |
| 23 | 2    | 2    | 1.417     | IPI:IPI00844578.1 |
| 24 | 2    | 2    | 0.7491    | IPI:IPI00420014.2 |
| 24 | 0    | 2    | 0.9412    | IPI:IPI00740142.2 |
| 24 | 0    | 2    | 2.689     | IPI:IPI00927472.1 |
| 25 | 2    | 2    | 14.68     | IPI:IPI00793330.1 |
| 25 | 0    | 2    | 14.29     | IPI:IPI00418813.2 |
| 25 | 0    | 2    | 10.26     | IPI:IPI00179330.6 |
| 25 | 0    | 2    | 15.090001 | IPI:IPI00798155.4 |
| 25 | 0    | 2    | 21.02     | IPI:IPI00798127.1 |
| 25 | 0    | 2    | 19.159999 | IPI:IPI00797400.1 |
| 25 | 0    | 2    | 20.379999 | IPI:IPI00796600.1 |
| 25 | 0    | 2    | 20.919999 | IPI:IPI00796007.2 |
| 25 | 0    | 2    | 25.95     | IPI:IPI00795527.1 |
| 25 | 0    | 2    | 25.400001 | IPI:IPI00794925.1 |
| 25 | 0    | 2    | 20.51     | IPI:IPI00794211.1 |
| 25 | 0    | 2    | 18.82     | IPI:IPI00793810.1 |
| 25 | 0    | 2    | 20.98     | IPI:IPI00793729.1 |



|    |      |      |           |                   |
|----|------|------|-----------|-------------------|
| 25 | 0    | 2    | 22.79     | IPI:IPI00792712.1 |
| 25 | 0    | 2    | 19.509999 | IPI:IPI00792139.1 |
| 25 | 0    | 2    | 22.02     | IPI:IPI00790633.1 |
| 25 | 0    | 2    | 22.38     | IPI:IPI00789823.1 |
| 25 | 0    | 2    | 18.11     | IPI:IPI00789107.1 |
| 25 | 0    | 2    | 20.919999 | IPI:IPI00784990.2 |
| 25 | 0    | 2    | 20.96     | IPI:IPI00719280.2 |
| 25 | 0    | 2    | 16.84     | IPI:IPI00654754.1 |
| 25 | 0    | 2    | 12.5      | IPI:IPI00456429.3 |
| 25 | 0    | 2    | 13.97     | IPI:IPI00794205.1 |
| 26 | 2    | 2    | 0.9302    | IPI:IPI00479743.3 |
| 26 | 0    | 2    | 1.05      | IPI:IPI00935352.1 |
| 26 | 0    | 2    | 5.051     | IPI:IPI00790339.1 |
| 26 | 0    | 2    | 0.9302    | IPI:IPI00740545.1 |
| 26 | 0    | 2    | 3.937     | IPI:IPI00414057.3 |
| 26 | 0    | 2    | 7.9999998 | IPI:IPI00942659.1 |
| 26 | 0    | 2    | 2.6529999 | IPI:IPI00930343.1 |
| 26 | 0    | 2    | 2.809     | IPI:IPI00930226.1 |
| 26 | 0    | 2    | 2.915     | IPI:IPI00922693.1 |
| 26 | 0    | 2    | 6.4939998 | IPI:IPI00921887.1 |
| 26 | 0    | 2    | 6.8970002 | IPI:IPI00917820.1 |
| 26 | 0    | 2    | 8.4030002 | IPI:IPI00917457.1 |
| 26 | 0    | 2    | 9.5239997 | IPI:IPI00917282.1 |
| 26 | 0    | 2    | 10.1      | IPI:IPI00894523.1 |
| 26 | 0    | 2    | 2.667     | IPI:IPI00894498.1 |
| 26 | 0    | 2    | 2.8489999 | IPI:IPI00894365.2 |
| 26 | 0    | 2    | 9.7089998 | IPI:IPI00893981.1 |
| 26 | 0    | 2    | 12.5      | IPI:IPI00893604.1 |
| 26 | 0    | 2    | 2.9239999 | IPI:IPI00878173.1 |
| 26 | 0    | 2    | 6.8489999 | IPI:IPI00796881.1 |
| 26 | 0    | 2    | 0.9302    | IPI:IPI00739539.6 |
| 26 | 0    | 2    | 0.9634    | IPI:IPI00738655.2 |
| 26 | 0    | 2    | 6.6229999 | IPI:IPI00645534.1 |
| 26 | 0    | 2    | 3.4600001 | IPI:IPI00514530.5 |
| 26 | 0    | 2    | 2.66      | IPI:IPI00025416.3 |
| 26 | 0    | 2    | 2.6529999 | IPI:IPI00023006.1 |
| 26 | 0    | 2    | 2.667     | IPI:IPI00021440.1 |
| 26 | 0    | 2    | 2.667     | IPI:IPI00021439.1 |
| 26 | 0    | 2    | 2.6529999 | IPI:IPI00021428.1 |
| 26 | 0    | 2    | 2.6529999 | IPI:IPI00008603.1 |
| 26 | 0    | 2    | 19.230001 | IPI:IPI00917545.1 |
| 26 | 0    | 2    | 3.0029999 | IPI:IPI00916212.1 |
| 27 | 1.61 | 1.61 | 0.7924    | IPI:IPI00644127.2 |
| 28 | 1.53 | 1.53 | 3.0379999 | IPI:IPI00940393.1 |
| 28 | 0    | 1.53 | 2.5970001 | IPI:IPI00472724.1 |
| 28 | 0    | 1.53 | 2.5970001 | IPI:IPI00396485.3 |
| 28 | 0    | 1.53 | 2.7210001 | IPI:IPI00025447.8 |
| 28 | 0    | 1.52 | 7.4069999 | IPI:IPI00879622.1 |
| 29 | 1.4  | 1.4  | 0.8491    | IPI:IPI00619903.3 |

29 0 1.4 0.836 IPI:IPI00024466.2

S12

| N  | Unused | Total | %Cov(95)  | Accession         |
|----|--------|-------|-----------|-------------------|
| 1  | 34.68  | 34.68 | 24.64     | IPI:IPI00022463.1 |
| 2  | 28.59  | 28.59 | 14.15     | IPI:IPI00100160.3 |
| 3  | 26.43  | 26.43 | 13.31     | IPI:IPI00844578.1 |
| 4  | 21.8   | 21.8  | 13.36     | IPI:IPI00939304.1 |
| 4  | 0      | 21.8  | 13.58     | IPI:IPI00793443.2 |
| 5  | 19.64  | 19.64 | 6.3270003 | IPI:IPI00019502.3 |
| 5  | 0      | 19.62 | 8.9730002 | IPI:IPI00395772.5 |
| 6  | 14.39  | 14.39 | 10.4      | IPI:IPI00645078.1 |
| 7  | 14.31  | 14.31 | 8.563     | IPI:IPI00922838.1 |
| 7  | 0      | 14.31 | 8.4080003 | IPI:IPI00000877.1 |
| 8  | 8.98   | 8.98  | 1.252     | IPI:IPI00879810.1 |
| 8  | 0      | 8.98  | 1.252     | IPI:IPI00871535.1 |
| 8  | 0      | 8.98  | 1.254     | IPI:IPI00844215.1 |
| 8  | 0      | 8.98  | 1.264     | IPI:IPI00843765.1 |
| 9  | 7.79   | 7.79  | 3.1580001 | IPI:IPI00293464.5 |
| 9  | 0      | 6.07  | 2.5769999 | IPI:IPI00909008.1 |
| 10 | 6.96   | 6.96  | 3.7349999 | IPI:IPI00917777.1 |
| 10 | 0      | 6.96  | 3.6010001 | IPI:IPI00003519.1 |
| 11 | 6.16   | 6.16  | 3.554     | IPI:IPI00185146.5 |
| 12 | 6.12   | 6.12  | 0.4381    | IPI:IPI00026781.3 |
| 13 | 5.69   | 5.69  | 2.4560001 | IPI:IPI00640197.1 |
| 13 | 0      | 5.69  | 2.482     | IPI:IPI00020416.8 |
| 14 | 5.53   | 5.53  | 2.2539999 | IPI:IPI00297646.5 |
| 15 | 5.5    | 5.5   | 8.0090001 | IPI:IPI00022488.1 |
| 16 | 5.29   | 5.29  | 3.3       | IPI:IPI00939422.1 |
| 16 | 0      | 5.29  | 3.1440001 | IPI:IPI00394838.3 |
| 16 | 0      | 5.29  | 3.2699998 | IPI:IPI00021290.5 |
| 16 | 0      | 3.54  | 3.012     | IPI:IPI00935456.1 |
| 17 | 5.05   | 5.05  | 4.1049998 | IPI:IPI00745872.2 |
| 17 | 0      | 5.04  | 4.7800001 | IPI:IPI00908876.1 |
| 17 | 0      | 5.04  | 5.0609998 | IPI:IPI00878517.1 |
| 17 | 0      | 4.99  | 4.1390002 | IPI:IPI00966829.1 |
| 17 | 0      | 4.99  | 3.9870001 | IPI:IPI00022434.4 |
| 17 | 0      | 4.19  | 5.9950002 | IPI:IPI00384697.2 |
| 17 | 0      | 4.19  | 5.9950002 | IPI:IPI00953582.1 |
| 17 | 0      | 4.18  | 6.3129999 | IPI:IPI00216773.4 |
| 18 | 4.42   | 4.42  | 13.9      | IPI:IPI00658013.1 |
| 18 | 0      | 4.42  | 12.24     | IPI:IPI00549248.4 |
| 18 | 0      | 2.42  | 7.925     | IPI:IPI00220740.1 |
| 19 | 4.01   | 4.01  | 2.1400001 | IPI:IPI00291136.4 |
| 20 | 2.32   | 4.97  | 1.331     | IPI:IPI00941217.1 |
| 20 | 0      | 4.97  | 1.326     | IPI:IPI00926581.1 |
| 20 | 0      | 4.97  | 1.348     | IPI:IPI00607818.3 |
| 20 | 0      | 4.97  | 1.353     | IPI:IPI00337335.7 |
| 20 | 0      | 4.97  | 1.518     | IPI:IPI00607778.1 |

|    |      |      |           |                   |
|----|------|------|-----------|-------------------|
| 20 | 0    | 4.95 | 1.8270001 | IPI:IPI00029818.5 |
| 21 | 2.18 | 2.18 | 1.445     | IPI:IPI00007402.3 |
| 22 | 2.13 | 2.13 | 0.986     | IPI:IPI00300371.5 |
| 23 | 2.1  | 2.1  | 1.863     | IPI:IPI00220327.4 |
| 24 | 2.02 | 2.02 | 1.436     | IPI:IPI00384542.4 |
| 24 | 0    | 2.02 | 1.283     | IPI:IPI00026944.3 |
| 25 | 2.02 | 2.02 | 2.785     | IPI:IPI00940393.1 |
| 25 | 0    | 2.02 | 2.3809999 | IPI:IPI00472724.1 |
| 25 | 0    | 2.02 | 2.3809999 | IPI:IPI00396485.3 |
| 25 | 0    | 2.02 | 2.4940001 | IPI:IPI00025447.8 |
| 25 | 0    | 2.02 | 3.235     | IPI:IPI00556204.1 |
| 25 | 0    | 2.02 | 2.376     | IPI:IPI00014424.1 |
| 25 | 0    | 2    | 4.8459999 | IPI:IPI00382804.1 |
| 26 | 2    | 2    | 0.8021    | IPI:IPI00965964.1 |
| 26 | 0    | 2    | 0.766     | IPI:IPI00939672.2 |
| 26 | 0    | 2    | 0.7653    | IPI:IPI00103994.4 |
| 26 | 0    | 2    | 0.7965    | IPI:IPI00871954.2 |
| 27 | 2    | 2    | 3.0300001 | IPI:IPI00827937.1 |
| 27 | 0    | 2    | 1.6170001 | IPI:IPI00956122.1 |
| 27 | 0    | 2    | 1.685     | IPI:IPI00955953.1 |
| 27 | 0    | 2    | 2.434     | IPI:IPI00955768.1 |
| 27 | 0    | 2    | 3.5289999 | IPI:IPI00922478.1 |
| 27 | 0    | 2    | 3.647     | IPI:IPI00918020.1 |
| 27 | 0    | 2    | 3.0379999 | IPI:IPI00854669.2 |
| 27 | 0    | 2    | 1.737     | IPI:IPI00828192.1 |
| 27 | 0    | 2    | 1.6349999 | IPI:IPI00828117.2 |
| 27 | 0    | 2    | 4.0819999 | IPI:IPI00828108.1 |
| 27 | 0    | 2    | 1.7170001 | IPI:IPI00828064.1 |
| 27 | 0    | 2    | 1.7960001 | IPI:IPI00828056.1 |
| 27 | 0    | 2    | 2.8240001 | IPI:IPI00827982.1 |
| 27 | 0    | 2    | 2.7969999 | IPI:IPI00827893.1 |
| 27 | 0    | 2    | 1.78      | IPI:IPI00827795.1 |
| 27 | 0    | 2    | 1.6829999 | IPI:IPI00827658.1 |
| 27 | 0    | 2    | 1.688     | IPI:IPI00827650.1 |
| 27 | 0    | 2    | 1.778     | IPI:IPI00827555.1 |
| 27 | 0    | 2    | 2.434     | IPI:IPI00419219.3 |
| 27 | 0    | 2    | 1.7170001 | IPI:IPI00418465.4 |
| 27 | 0    | 2    | 1.6170001 | IPI:IPI00305064.1 |
| 27 | 0    | 2    | 3.3240002 | IPI:IPI00297160.4 |
| 28 | 1.76 | 1.76 | 0.993     | IPI:IPI00216641.1 |
| 28 | 0    | 1.76 | 0.9823    | IPI:IPI00029751.1 |
| 28 | 0    | 1.74 | 1.595     | IPI:IPI00479304.1 |
| 29 | 1.7  | 1.7  | 0.9839    | IPI:IPI00399170.1 |
| 29 | 0    | 1.7  | 0.9743    | IPI:IPI00034049.1 |

S13

| N | Unused | Total | %Cov(95)  | Accession         |
|---|--------|-------|-----------|-------------------|
| 1 | 78.29  | 78.29 | 55.870003 | IPI:IPI00013808.1 |
| 2 | 58.33  | 58.33 | 47.850001 | IPI:IPI00022463.1 |

|    |       |       |           |                    |
|----|-------|-------|-----------|--------------------|
| 3  | 37.95 | 37.95 | 32.170001 | IPI:IPI00186290.6  |
| 4  | 33.79 | 33.79 | 33.250001 | IPI:IPI00022774.3  |
| 5  | 28.89 | 58.1  | 41.139999 | IPI:IPI00013508.5  |
| 5  | 0     | 56.1  | 37.099999 | IPI:IPI00921118.1  |
| 5  | 0     | 56.1  | 38.9      | IPI:IPI00909239.1  |
| 5  | 0     | 56.1  | 37.75     | IPI:IPI00759776.1  |
| 6  | 28.26 | 28.26 | 20.6      | IPI:IPI00011454.1  |
| 6  | 0     | 28.26 | 20        | IPI:IPI00383581.4  |
| 7  | 26.96 | 26.96 | 22.29     | IPI:IPI00027230.3  |
| 8  | 26.05 | 26.05 | 14.88     | IPI:IPI00943894.1  |
| 8  | 0     | 26.05 | 14.29     | IPI:IPI00783313.2  |
| 9  | 15.9  | 15.9  | 9.9019997 | IPI:IPI00026216.4  |
| 10 | 13.02 | 13.02 | 9.7199999 | IPI:IPI00412924.2  |
| 10 | 0     | 13.02 | 9.7070001 | IPI:IPI00412681.2  |
| 10 | 0     | 13.02 | 9.9590003 | IPI:IPI00219187.1  |
| 10 | 0     | 13.02 | 9.4810002 | IPI:IPI00006608.1  |
| 10 | 0     | 12.95 | 10.5      | IPI:IPI00412568.3  |
| 10 | 0     | 12.95 | 10.22     | IPI:IPI00219186.1  |
| 10 | 0     | 12.95 | 10.49     | IPI:IPI00219185.1  |
| 10 | 0     | 12.95 | 10.78     | IPI:IPI00219183.1  |
| 10 | 0     | 11.8  | 10.22     | IPI:IPI00914602.1  |
| 10 | 0     | 11.72 | 11.06     | IPI:IPI00394658.2  |
| 11 | 10.86 | 10.86 | 11.46     | IPI:IPI00010740.1  |
| 11 | 0     | 10.86 | 12.11     | IPI:IPI00216613.1  |
| 12 | 10.33 | 10.33 | 8.1479996 | IPI:IPI00219994.2  |
| 12 | 0     | 10.33 | 7.9300001 | IPI:IPI00022744.5  |
| 13 | 9.92  | 9.92  | 6.9600001 | IPI:IPI00289330.4  |
| 14 | 9.3   | 9.3   | 10.42     | IPI:IPI00604620.3  |
| 14 | 0     | 9.3   | 12.27     | IPI:IPI00444262.3  |
| 15 | 8.74  | 8.74  | 7.2729997 | IPI:IPI00218342.10 |
| 15 | 0     | 6.75  | 4.51      | IPI:IPI00794900.3  |
| 16 | 8.09  | 8.09  | 6.312     | IPI:IPI00449049.5  |
| 16 | 0     | 8.09  | 6.4450003 | IPI:IPI00967299.1  |
| 17 | 7.52  | 7.52  | 10.77     | IPI:IPI00023673.1  |
| 17 | 0     | 5.52  | 10.1      | IPI:IPI00902654.2  |
| 17 | 0     | 5.52  | 11.84     | IPI:IPI00908762.2  |
| 18 | 6.88  | 6.88  | 6.072     | IPI:IPI00294839.6  |
| 19 | 6.34  | 6.34  | 3.81      | IPI:IPI00002966.2  |
| 20 | 6.04  | 6.04  | 5.2510001 | IPI:IPI00001639.2  |
| 21 | 6     | 6     | 3.6979999 | IPI:IPI00300371.5  |
| 22 | 5.81  | 5.81  | 3.7379999 | IPI:IPI00893013.1  |
| 22 | 0     | 5.81  | 3.7349999 | IPI:IPI00298961.3  |
| 23 | 4     | 4     | 1.888     | IPI:IPI00019502.3  |
| 24 | 4     | 4     | 8.602     | IPI:IPI00647896.1  |
| 24 | 0     | 4     | 7.5120002 | IPI:IPI00645452.1  |
| 24 | 0     | 4     | 7.1910001 | IPI:IPI00930715.1  |
| 24 | 0     | 4     | 7.1910001 | IPI:IPI00031370.3  |
| 24 | 0     | 4     | 7.1910001 | IPI:IPI00013475.1  |
| 24 | 0     | 4     | 7.1910001 | IPI:IPI00007752.1  |

|    |      |      |           |                    |
|----|------|------|-----------|--------------------|
| 24 | 0    | 2.11 | 4.7619998 | IPI:IPI00640115.1  |
| 24 | 0    | 2.11 | 2.258     | IPI:IPI00152453.1  |
| 24 | 0    | 2.11 | 3.9999999 | IPI:IPI00013683.2  |
| 24 | 0    | 2.11 | 4.0270001 | IPI:IPI00646779.2  |
| 24 | 0    | 2    | 3.4400001 | IPI:IPI00945532.1  |
| 24 | 0    | 2    | 3.0169999 | IPI:IPI00909140.7  |
| 24 | 0    | 2    | 4.4160001 | IPI:IPI00908770.1  |
| 24 | 0    | 2    | 7.7780001 | IPI:IPI00877930.1  |
| 24 | 0    | 2    | 3.4150001 | IPI:IPI00514047.1  |
| 24 | 0    | 2    | 3.153     | IPI:IPI00292496.1  |
| 24 | 0    | 2    | 3.4230001 | IPI:IPI00956657.1  |
| 24 | 0    | 2    | 3.5259999 | IPI:IPI00930130.2  |
| 24 | 0    | 2    | 3.867     | IPI:IPI00926685.1  |
| 24 | 0    | 2    | 3.7629999 | IPI:IPI00739915.3  |
| 24 | 0    | 2    | 3.153     | IPI:IPI00174849.4  |
| 24 | 0    | 2    | 3.153     | IPI:IPI00023598.2  |
| 24 | 0    | 2    | 5.9319999 | IPI:IPI00956241.1  |
| 24 | 0    | 2    | 5.9319999 | IPI:IPI00909781.1  |
| 24 | 0    | 2    | 3.3489998 | IPI:IPI00908469.1  |
| 24 | 0    | 2    | 3.675     | IPI:IPI00643158.1  |
| 24 | 0    | 2    | 3.4230001 | IPI:IPI00641706.1  |
| 24 | 0    | 2    | 7.4069999 | IPI:IPI00953417.1  |
| 25 | 4    | 4    | 3.7269998 | IPI:IPI00220327.4  |
| 26 | 3.52 | 4.74 | 4.716     | IPI:IPI00218852.4  |
| 26 | 0    | 3.52 | 7.5580001 | IPI:IPI00926721.1  |
| 26 | 0    | 1.52 | 6.103     | IPI:IPI00926559.1  |
| 27 | 3.16 | 3.16 | 1.928     | IPI:IPI00926258.1  |
| 27 | 0    | 3.16 | 1.6519999 | IPI:IPI00012268.3  |
| 27 | 0    | 3.13 | 2.0029999 | IPI:IPI00926410.1  |
| 27 | 0    | 3.13 | 2.538     | IPI:IPI00384420.1  |
| 27 | 0    | 3.13 | 7.3890001 | IPI:IPI00925437.1  |
| 27 | 0    | 3.13 | 7.5000003 | IPI:IPI00793022.1  |
| 28 | 2.85 | 2.85 | 9.6639998 | IPI:IPI00943244.1  |
| 28 | 0    | 2.85 | 2.6350001 | IPI:IPI00938079.1  |
| 28 | 0    | 2.85 | 2.65      | IPI:IPI00246058.10 |
| 28 | 0    | 2.85 | 17.97     | IPI:IPI00937686.1  |
| 29 | 2.82 | 2.82 | 0.8478    | IPI:IPI00879810.1  |
| 29 | 0    | 2.82 | 0.8478    | IPI:IPI00871535.1  |
| 29 | 0    | 2.82 | 0.8495    | IPI:IPI00844215.1  |
| 29 | 0    | 2.82 | 0.8564    | IPI:IPI00843765.1  |
| 30 | 2.74 | 2.74 | 3.05      | IPI:IPI00965074.1  |
| 30 | 0    | 2.74 | 3.084     | IPI:IPI00965913.1  |
| 30 | 0    | 2.74 | 2.6769999 | IPI:IPI00908876.1  |
| 30 | 0    | 2.74 | 2.8340001 | IPI:IPI00878517.1  |
| 30 | 0    | 2.74 | 2.299     | IPI:IPI00745872.2  |
| 30 | 0    | 2.74 | 2.2329999 | IPI:IPI00022434.4  |
| 30 | 0    | 2.74 | 2.318     | IPI:IPI00966829.1  |
| 30 | 0    | 1.57 | 7.1070001 | IPI:IPI00878282.1  |
| 31 | 2.2  | 2.2  | 1.701     | IPI:IPI00645078.1  |

|    |      |      |           |                   |
|----|------|------|-----------|-------------------|
| 32 | 2.16 | 2.32 | 1.9130001 | IPI:IPI00784295.2 |
| 32 | 0.01 | 2.01 | 1.9889999 | IPI:IPI00030275.5 |
| 32 | 0    | 3.7  | 3.5909999 | IPI:IPI00414676.6 |
| 32 | 0    | 3.52 | 4.355     | IPI:IPI00555614.1 |
| 32 | 0    | 2.32 | 1.639     | IPI:IPI00382470.3 |
| 32 | 0    | 2.16 | 2.5970001 | IPI:IPI00604607.2 |
| 32 | 0    | 2.02 | 7.6499999 | IPI:IPI00746291.2 |
| 32 | 0    | 2.02 | 9.0910003 | IPI:IPI00640129.2 |
| 32 | 0    | 2.02 | 8.642     | IPI:IPI00515119.3 |
| 32 | 0    | 2    | 2.8279999 | IPI:IPI00646055.1 |
| 33 | 2.12 | 2.12 | 2.667     | IPI:IPI00883857.2 |
| 33 | 0    | 2.12 | 2.806     | IPI:IPI00644224.2 |
| 33 | 0    | 2.12 | 2.73      | IPI:IPI00479217.1 |
| 33 | 0    | 2.12 | 3.0470001 | IPI:IPI00644079.3 |
| 34 | 2.03 | 2.03 | 1.227     | IPI:IPI00026089.4 |
| 35 | 2.03 | 2.03 | 5.195     | IPI:IPI00022488.1 |
| 36 | 2.01 | 2.01 | 1.311     | IPI:IPI00303210.4 |
| 36 | 0    | 2    | 1.351     | IPI:IPI00878576.5 |
| 36 | 0    | 2    | 1.39      | IPI:IPI00156171.3 |
| 37 | 2    | 2.49 | 1.7480001 | IPI:IPI00939163.1 |
| 37 | 0    | 2.49 | 1.7440001 | IPI:IPI00514983.4 |
| 37 | 0    | 2.49 | 1.836     | IPI:IPI00513743.1 |
| 37 | 0    | 2.49 | 1.843     | IPI:IPI00218993.1 |
| 37 | 0    | 2.49 | 2.2159999 | IPI:IPI00908988.1 |
| 37 | 0    | 2.49 | 2.3469999 | IPI:IPI00910755.1 |
| 38 | 2    | 2    | 1.5760001 | IPI:IPI00903226.1 |
| 38 | 0    | 2    | 1.629     | IPI:IPI00220665.6 |
| 38 | 0    | 2    | 1.636     | IPI:IPI00018246.5 |
| 38 | 0    | 2    | 1.657     | IPI:IPI00220667.3 |
| 38 | 0    | 2    | 1.6380001 | IPI:IPI00220663.3 |
| 39 | 2    | 2    | 1.9379999 | IPI:IPI00953077.1 |
| 39 | 0    | 2    | 1.935     | IPI:IPI00473136.3 |
| 39 | 0    | 2    | 1.987     | IPI:IPI00215948.4 |
| 40 | 2    | 2    | 3.1429999 | IPI:IPI00168728.1 |
| 40 | 0    | 2    | 3.712     | IPI:IPI00956528.1 |
| 40 | 0    | 2    | 3.3829998 | IPI:IPI00930124.1 |
| 40 | 0    | 2    | 4.2440001 | IPI:IPI00827754.3 |
| 40 | 0    | 2    | 3.441     | IPI:IPI00785084.2 |
| 40 | 0    | 2    | 3.3679999 | IPI:IPI00784817.1 |
| 40 | 0    | 2    | 3.39      | IPI:IPI00645363.2 |
| 40 | 0    | 2    | 3.0889999 | IPI:IPI00418153.1 |
| 40 | 0    | 2    | 3.39      | IPI:IPI00876888.1 |
| 40 | 0    | 2    | 3.4329999 | IPI:IPI00816314.1 |
| 40 | 0    | 2    | 3.3679999 | IPI:IPI00784842.1 |
| 40 | 0    | 2    | 4.0100001 | IPI:IPI00448925.6 |
| 40 | 0    | 2    | 3.3259999 | IPI:IPI00423466.1 |
| 40 | 0    | 2    | 3.3679999 | IPI:IPI00423464.1 |
| 40 | 0    | 2    | 3.3330001 | IPI:IPI00423463.1 |
| 40 | 0    | 2    | 3.3199999 | IPI:IPI00384938.1 |

|    |      |      |           |                   |
|----|------|------|-----------|-------------------|
| 41 | 2    | 2    | 2.4049999 | IPI:IPI00017870.1 |
| 41 | 0    | 2    | 2.709     | IPI:IPI00787323.2 |
| 41 | 0    | 2    | 5.714     | IPI:IPI00792642.1 |
| 41 | 0    | 2    | 2.4839999 | IPI:IPI00554648.3 |
| 41 | 0    | 2    | 6.0910001 | IPI:IPI00396004.3 |
| 41 | 0    | 2    | 8.1079997 | IPI:IPI00795725.1 |
| 41 | 0    | 2    | 5.0629999 | IPI:IPI00793917.1 |
| 41 | 0    | 2    | 10        | IPI:IPI00793202.1 |
| 42 | 2    | 2    | 2.6219999 | IPI:IPI00966217.1 |
| 42 | 0    | 2    | 2.6219999 | IPI:IPI00915423.2 |
| 42 | 0    | 2    | 2.303     | IPI:IPI00793673.1 |
| 42 | 0    | 2    | 2.328     | IPI:IPI00290553.2 |
| 42 | 0    | 2    | 4.1579999 | IPI:IPI00158280.4 |
| 43 | 2    | 2    | 1.302     | IPI:IPI00456695.1 |
| 43 | 0    | 2    | 1.259     | IPI:IPI00299608.3 |
| 43 | 0    | 2    | 6.25      | IPI:IPI00917594.1 |
| 44 | 2    | 2    | 2.923     | IPI:IPI00952875.1 |
| 44 | 0    | 2    | 3.104     | IPI:IPI00930688.1 |
| 44 | 0    | 2    | 4.1790001 | IPI:IPI00793930.1 |
| 44 | 0    | 2    | 3.365     | IPI:IPI00792677.1 |
| 44 | 0    | 2    | 3.655     | IPI:IPI00792478.1 |
| 44 | 0    | 2    | 2.998     | IPI:IPI00791613.1 |
| 44 | 0    | 2    | 3.118     | IPI:IPI00646909.2 |
| 44 | 0    | 2    | 3.118     | IPI:IPI00218343.4 |
| 44 | 0    | 2    | 8.9740001 | IPI:IPI00916391.1 |
| 44 | 0    | 2    | 3.204     | IPI:IPI00873427.1 |
| 44 | 0    | 2    | 3.2329999 | IPI:IPI00794663.1 |
| 44 | 0    | 2    | 5.4469999 | IPI:IPI00478908.3 |
| 44 | 0    | 2    | 2.6969999 | IPI:IPI00387144.5 |
| 44 | 0    | 2    | 5.263     | IPI:IPI00335314.3 |
| 44 | 0    | 2    | 5.8090001 | IPI:IPI00017454.4 |
| 44 | 0    | 2    | 3.125     | IPI:IPI00007750.1 |
| 44 | 0    | 2    | 5.263     | IPI:IPI00942772.1 |
| 45 | 2    | 2    | 4.3960001 | IPI:IPI00908532.1 |
| 45 | 0    | 2    | 3.8369998 | IPI:IPI00884105.2 |
| 46 | 2    | 2    | 1.382     | IPI:IPI00477831.2 |
| 46 | 0    | 2    | 1.371     | IPI:IPI00165949.2 |
| 46 | 0    | 2    | 9.0279996 | IPI:IPI00966575.1 |
| 47 | 1.9  | 1.9  | 0.7322    | IPI:IPI00455383.4 |
| 47 | 0    | 1.9  | 0.7164    | IPI:IPI00024067.4 |
| 47 | 0    | 1.7  | 0.7581    | IPI:IPI00300446.1 |
| 47 | 0    | 1.7  | 0.7317    | IPI:IPI00022881.1 |
| 48 | 1.79 | 1.79 | 2.0880001 | IPI:IPI00140420.4 |
| 49 | 1.7  | 1.7  | 1.373     | IPI:IPI00783982.1 |
| 49 | 0    | 1.7  | 1.378     | IPI:IPI00002557.1 |
| 50 | 1.52 | 1.52 | 1.543     | IPI:IPI00025890.4 |
| 50 | 0    | 1.52 | 1.746     | IPI:IPI00852843.1 |
| 51 | 1.52 | 1.52 | 1.619     | IPI:IPI00020407.1 |
| 52 | 1.4  | 1.4  | 0.8425    | IPI:IPI00827781.3 |

|    |   |     |        |                   |
|----|---|-----|--------|-------------------|
| 52 | 0 | 1.4 | 0.8511 | IPI:IPI00014897.4 |
| 52 | 0 | 1.4 | 0.9785 | IPI:IPI00883983.1 |
| 52 | 0 | 1.4 | 0.8375 | IPI:IPI00783004.2 |

S14

| N  | Unused | Total  | %Cov(95)  | Accession         |
|----|--------|--------|-----------|-------------------|
| 1  | 104.13 | 104.13 | 68.480003 | IPI:IPI00022463.1 |
| 2  | 50.27  | 50.27  | 37.84     | IPI:IPI00784295.2 |
| 2  | 0      | 50.27  | 32.440001 | IPI:IPI00382470.3 |
| 3  | 46.98  | 46.98  | 39.51     | IPI:IPI00026314.1 |
| 3  | 0      | 44.98  | 40.970001 | IPI:IPI00647556.2 |
| 4  | 22.61  | 40.22  | 31.63     | IPI:IPI00414676.6 |
| 5  | 12.56  | 14.22  | 9.8899998 | IPI:IPI00289330.4 |
| 5  | 0      | 12.22  | 8.4980004 | IPI:IPI00791035.2 |
| 6  | 11.39  | 11.39  | 9.437     | IPI:IPI00604620.3 |
| 6  | 0      | 10.65  | 11.11     | IPI:IPI00444262.3 |
| 7  | 9.16   | 9.16   | 9.8360002 | IPI:IPI00220834.8 |
| 8  | 8.37   | 8.37   | 10.77     | IPI:IPI00023673.1 |
| 8  | 0      | 6.37   | 10.1      | IPI:IPI00902654.2 |
| 9  | 6      | 6      | 8.9400001 | IPI:IPI00872013.1 |
| 9  | 0      | 6      | 8.9400001 | IPI:IPI00465016.7 |
| 9  | 0      | 6      | 7.2290003 | IPI:IPI00003590.2 |
| 9  | 0      | 4      | 4.2879999 | IPI:IPI00015916.1 |
| 10 | 6      | 6      | 7.7019997 | IPI:IPI00013871.1 |
| 10 | 0      | 6      | 8.5790001 | IPI:IPI00943207.1 |
| 11 | 5.63   | 5.63   | 4.848     | IPI:IPI00883857.2 |
| 11 | 0      | 5.63   | 5.5399999 | IPI:IPI00644079.3 |
| 11 | 0      | 5.63   | 5.102     | IPI:IPI00644224.2 |
| 11 | 0      | 5.63   | 4.9630001 | IPI:IPI00479217.1 |
| 12 | 4.42   | 4.42   | 5.381     | IPI:IPI00216613.1 |
| 12 | 0      | 4.42   | 5.0919998 | IPI:IPI00010740.1 |
| 13 | 4.28   | 4.28   | 3.8940001 | IPI:IPI00018931.6 |
| 14 | 4.22   | 4.22   | 4.4410001 | IPI:IPI00376394.4 |
| 15 | 4      | 4      | 2.173     | IPI:IPI00009342.1 |
| 16 | 3.7    | 3.7    | 2.366     | IPI:IPI00921118.1 |
| 16 | 0      | 3.7    | 2.4800001 | IPI:IPI00909239.1 |
| 16 | 0      | 3.7    | 2.407     | IPI:IPI00759776.1 |
| 16 | 0      | 3.7    | 2.4660001 | IPI:IPI00013508.5 |
| 16 | 0      | 3.7    | 2.4150001 | IPI:IPI00013808.1 |
| 16 | 0      | 2      | 3.5089999 | IPI:IPI00942539.1 |
| 16 | 0      | 2      | 2.303     | IPI:IPI00845465.1 |
| 16 | 0      | 1.7    | 2.3979999 | IPI:IPI00908776.2 |
| 17 | 2.68   | 2.68   | 1.983     | IPI:IPI00556173.1 |
| 17 | 0      | 2.68   | 1.559     | IPI:IPI00418313.3 |
| 17 | 0      | 2.68   | 1.832     | IPI:IPI00414335.2 |
| 17 | 0      | 2.68   | 1.994     | IPI:IPI00298789.2 |
| 17 | 0      | 2.68   | 1.5659999 | IPI:IPI00298788.4 |
| 17 | 0      | 2.68   | 2.029     | IPI:IPI00219330.2 |
| 17 | 0      | 2      | 3.111     | IPI:IPI00556364.1 |



|    |      |      |           |                    |
|----|------|------|-----------|--------------------|
| 18 | 2.13 | 2.13 | 2.069     | IPI:IPI00925952.1  |
| 18 | 0    | 2.13 | 1.963     | IPI:IPI00925511.1  |
| 18 | 0    | 2.13 | 1.935     | IPI:IPI00925046.1  |
| 18 | 0    | 2.13 | 2.3809999 | IPI:IPI00796022.3  |
| 18 | 0    | 2.13 | 1.8920001 | IPI:IPI00026665.2  |
| 18 | 0    | 2.13 | 5.9289999 | IPI:IPI00925203.1  |
| 19 | 2.09 | 2.09 | 2.4560001 | IPI:IPI00944977.1  |
| 19 | 0    | 2.09 | 2.4560001 | IPI:IPI00807403.1  |
| 19 | 0    | 2.09 | 2.523     | IPI:IPI00795504.1  |
| 19 | 0    | 2.09 | 2.4560001 | IPI:IPI00791964.4  |
| 19 | 0    | 2.09 | 2.4010001 | IPI:IPI00015102.2  |
| 19 | 0    | 2    | 4.07      | IPI:IPI00945338.1  |
| 20 | 2    | 2    | 0.8163    | IPI:IPI00019502.3  |
| 21 | 2    | 2    | 2.5210001 | IPI:IPI00914602.1  |
| 21 | 0    | 2    | 2.8890001 | IPI:IPI00909502.2  |
| 21 | 0    | 2    | 2.397     | IPI:IPI00412924.2  |
| 21 | 0    | 2    | 2.3940001 | IPI:IPI00412681.2  |
| 21 | 0    | 2    | 2.5900001 | IPI:IPI00412568.3  |
| 21 | 0    | 2    | 2.4560001 | IPI:IPI00219187.1  |
| 21 | 0    | 2    | 2.5210001 | IPI:IPI00219186.1  |
| 21 | 0    | 2    | 2.586     | IPI:IPI00219185.1  |
| 21 | 0    | 2    | 2.6590001 | IPI:IPI00219183.1  |
| 21 | 0    | 2    | 2.338     | IPI:IPI00006608.1  |
| 21 | 0    | 2    | 2.727     | IPI:IPI00394658.2  |
| 22 | 2    | 2    | 1.863     | IPI:IPI00220327.4  |
| 23 | 2    | 2    | 1.826     | IPI:IPI00001639.2  |
| 24 | 1.7  | 1.7  | 1.983     | IPI:IPI00939892.1  |
| 24 | 0    | 1.7  | 2.2430001 | IPI:IPI00241841.10 |
| 24 | 0    | 1.7  | 2.1779999 | IPI:IPI00005859.5  |
| 24 | 0    | 1.7  | 2.0339999 | IPI:IPI00009867.3  |
| 24 | 0    | 1.7  | 2.214     | IPI:IPI00956313.1  |
| 24 | 0    | 1.7  | 2.214     | IPI:IPI00942257.1  |
| 24 | 0    | 1.7  | 2.128     | IPI:IPI00930073.1  |
| 24 | 0    | 1.7  | 2.2810001 | IPI:IPI00910738.1  |
| 24 | 0    | 1.7  | 2.2430001 | IPI:IPI00909059.5  |
| 24 | 0    | 1.7  | 2.1159999 | IPI:IPI00796776.1  |
| 24 | 0    | 1.7  | 2.128     | IPI:IPI00300725.7  |
| 24 | 0    | 1.7  | 2.128     | IPI:IPI00299145.9  |
| 24 | 0    | 1.7  | 2.128     | IPI:IPI00293665.9  |
| 24 | 0    | 1.7  | 1.86      | IPI:IPI00021304.1  |
| 25 | 1.52 | 1.52 | 1.519     | IPI:IPI00019380.1  |

S15

| N | Unused | Total  | %Cov(95)  | Accession         |
|---|--------|--------|-----------|-------------------|
| 1 | 123.33 | 123.33 | 68.769997 | IPI:IPI00022463.1 |
| 2 | 43.02  | 43.02  | 45.359999 | IPI:IPI00003865.1 |
| 3 | 32.44  | 37.05  | 31.909999 | IPI:IPI00003362.2 |
| 4 | 14.12  | 14.12  | 17.77     | IPI:IPI00893179.1 |
| 4 | 0      | 14.12  | 16.26     | IPI:IPI00644712.4 |

|    |       |       |           |                   |
|----|-------|-------|-----------|-------------------|
| 4  | 0     | 12.72 | 15.74     | IPI:IPI00893062.1 |
| 5  | 11.2  | 11.2  | 13.54     | IPI:IPI00872814.1 |
| 5  | 0     | 11.2  | 13.519999 | IPI:IPI00219365.3 |
| 6  | 10.16 | 10.16 | 9.973     | IPI:IPI00784295.2 |
| 6  | 0     | 10.16 | 8.5479997 | IPI:IPI00382470.3 |
| 7  | 8.08  | 8.08  | 10.11     | IPI:IPI00220834.8 |
| 8  | 6.38  | 6.38  | 5.8710001 | IPI:IPI00943074.1 |
| 8  | 0     | 6.38  | 5.9050001 | IPI:IPI00792916.2 |
| 8  | 0     | 6.38  | 5.7939999 | IPI:IPI00026154.3 |
| 8  | 0     | 5.22  | 17.129999 | IPI:IPI00829824.1 |
| 9  | 5.52  | 5.52  | 2.073     | IPI:IPI00005614.6 |
| 9  | 0     | 5.52  | 2.2740001 | IPI:IPI00333015.7 |
| 9  | 0     | 5.52  | 2.2600001 | IPI:IPI00328230.2 |
| 10 | 4.89  | 8.87  | 9.386     | IPI:IPI00872684.1 |
| 10 | 0     | 8.87  | 9.386     | IPI:IPI00843975.1 |
| 11 | 4.27  | 4.27  | 4.225     | IPI:IPI00008164.2 |
| 12 | 4.03  | 4.03  | 5.4389998 | IPI:IPI00872788.1 |
| 12 | 0     | 4.03  | 4.532     | IPI:IPI00029111.3 |
| 13 | 3.71  | 8.34  | 8.1119999 | IPI:IPI00304925.5 |
| 13 | 0     | 8.34  | 8.1119999 | IPI:IPI00845339.1 |
| 13 | 0     | 8.02  | 7.3760003 | IPI:IPI00643152.2 |
| 13 | 0     | 8.02  | 8.9189999 | IPI:IPI00942823.1 |
| 13 | 0     | 8.02  | 8.9189999 | IPI:IPI00940023.1 |
| 13 | 0     | 8.02  | 8.9189999 | IPI:IPI00939753.1 |
| 13 | 0     | 8.02  | 8.1119999 | IPI:IPI00939442.1 |
| 13 | 0     | 8.02  | 8.1119999 | IPI:IPI00893099.1 |
| 13 | 0     | 8.01  | 8.8739999 | IPI:IPI00911039.1 |
| 13 | 0     | 8     | 22.409999 | IPI:IPI00941328.1 |
| 13 | 0     | 8     | 21.85     | IPI:IPI00939526.1 |
| 13 | 0     | 8     | 22.409999 | IPI:IPI00940553.1 |
| 13 | 0     | 6     | 15.52     | IPI:IPI00910047.1 |
| 14 | 3.67  | 3.67  | 3.8249999 | IPI:IPI00297550.8 |
| 14 | 0     | 3.52  | 4.473     | IPI:IPI00966485.1 |
| 14 | 0     | 2.14  | 9.4120003 | IPI:IPI00855773.1 |
| 14 | 0     | 2.14  | 11.59     | IPI:IPI00642188.2 |
| 15 | 3.05  | 3.05  | 2.469     | IPI:IPI00645849.1 |
| 15 | 0     | 3.05  | 2.593     | IPI:IPI00003351.2 |
| 15 | 0     | 2     | 3.373     | IPI:IPI00006969.2 |
| 15 | 0     | 2     | 8.2350001 | IPI:IPI00909747.1 |
| 16 | 2.92  | 2.92  | 2.4219999 | IPI:IPI00296635.5 |
| 17 | 2.48  | 2.48  | 2.483     | IPI:IPI00966829.1 |
| 17 | 0     | 2.48  | 2.4630001 | IPI:IPI00745872.2 |
| 17 | 0     | 2.48  | 2.392     | IPI:IPI00022434.4 |
| 17 | 0     | 2.48  | 2.868     | IPI:IPI00908876.1 |
| 17 | 0     | 2.48  | 3.3039998 | IPI:IPI00965913.1 |
| 17 | 0     | 2.48  | 3.2680001 | IPI:IPI00965074.1 |
| 17 | 0     | 2.48  | 3.036     | IPI:IPI00878517.1 |
| 17 | 0     | 2.05  | 3.5969999 | IPI:IPI00953582.1 |
| 17 | 0     | 2.05  | 3.5969999 | IPI:IPI00384697.2 |

|    |      |      |           |                   |
|----|------|------|-----------|-------------------|
| 17 | 0    | 2.03 | 3.788     | IPI:IPI00216773.4 |
| 18 | 2.47 | 2.47 | 1.918     | IPI:IPI00026314.1 |
| 18 | 0    | 2.47 | 2.022     | IPI:IPI00647556.2 |
| 18 | 0    | 2.47 | 2.052     | IPI:IPI00646773.2 |
| 18 | 0    | 2    | 5.7689998 | IPI:IPI00641047.5 |
| 19 | 2.05 | 8.05 | 7.4589998 | IPI:IPI00414676.6 |
| 19 | 0    | 4    | 4.8579998 | IPI:IPI00555614.1 |
| 19 | 0    | 4    | 6.3979998 | IPI:IPI00455599.4 |
| 19 | 0    | 4    | 8.0360003 | IPI:IPI00966583.1 |
| 20 | 2    | 2.03 | 1.8990001 | IPI:IPI00922694.1 |
| 20 | 0    | 2    | 1.767     | IPI:IPI00007765.5 |
| 21 | 2    | 2    | 1.075     | IPI:IPI00921118.1 |
| 21 | 0    | 2    | 1.127     | IPI:IPI00909239.1 |
| 21 | 0    | 2    | 2.3979999 | IPI:IPI00908776.2 |
| 21 | 0    | 2    | 1.094     | IPI:IPI00759776.1 |
| 21 | 0    | 2    | 1.098     | IPI:IPI00013808.1 |
| 21 | 0    | 2    | 1.121     | IPI:IPI00013508.5 |
| 22 | 2    | 2    | 2.667     | IPI:IPI00883857.2 |
| 22 | 0    | 2    | 3.0470001 | IPI:IPI00644079.3 |
| 22 | 0    | 2    | 2.806     | IPI:IPI00644224.2 |
| 22 | 0    | 2    | 2.73      | IPI:IPI00479217.1 |
| 23 | 2    | 2    | 2.4839999 | IPI:IPI00554648.3 |
| 23 | 0    | 2    | 5.0629999 | IPI:IPI00793917.1 |
| 23 | 0    | 2    | 2.709     | IPI:IPI00787323.2 |
| 23 | 0    | 2    | 8.1079997 | IPI:IPI00795725.1 |
| 23 | 0    | 2    | 5.714     | IPI:IPI00792642.1 |
| 23 | 0    | 2    | 10        | IPI:IPI00793202.1 |
| 23 | 0    | 2    | 2.4049999 | IPI:IPI00017870.1 |
| 23 | 0    | 2    | 6.0910001 | IPI:IPI00396004.3 |
| 24 | 2    | 2    | 2.643     | IPI:IPI00299904.3 |
| 24 | 0    | 2    | 3.4990001 | IPI:IPI00376143.1 |
| 24 | 0    | 2    | 4.8840001 | IPI:IPI00219740.3 |
| 24 | 0    | 2    | 10.38     | IPI:IPI00925989.1 |
| 25 | 2    | 2    | 2.534     | IPI:IPI00941747.1 |
| 25 | 0    | 2    | 2.392     | IPI:IPI00020984.2 |
| 26 | 2    | 2    | 1.475     | IPI:IPI00647286.1 |
| 26 | 0    | 2    | 1.501     | IPI:IPI00456750.2 |
| 26 | 0    | 2    | 3.3640001 | IPI:IPI00917117.1 |
| 27 | 2    | 2    | 1.519     | IPI:IPI00019380.1 |
| 28 | 2    | 2    | 4.07      | IPI:IPI00945338.1 |
| 28 | 0    | 2    | 2.4560001 | IPI:IPI00944977.1 |
| 28 | 0    | 2    | 2.4560001 | IPI:IPI00807403.1 |
| 28 | 0    | 2    | 2.4560001 | IPI:IPI00791964.4 |
| 28 | 0    | 2    | 2.4010001 | IPI:IPI00015102.2 |
| 28 | 0    | 2    | 2.523     | IPI:IPI00795504.1 |
| 29 | 2    | 2    | 3.066     | IPI:IPI00915808.1 |
| 29 | 0    | 2    | 2.8419999 | IPI:IPI00783097.3 |
| 30 | 1.52 | 1.52 | 1.905     | IPI:IPI00604710.2 |
| 30 | 0    | 1.52 | 2.1129999 | IPI:IPI00554722.1 |

|    |     |      |           |                   |
|----|-----|------|-----------|-------------------|
| 30 | 0   | 1.52 | 2.0029999 | IPI:IPI00554702.1 |
| 30 | 0   | 1.52 | 1.902     | IPI:IPI00554611.1 |
| 30 | 0   | 1.52 | 1.815     | IPI:IPI00554481.1 |
| 30 | 0   | 1.52 | 2.2679999 | IPI:IPI00027493.1 |
| 31 | 1.4 | 1.4  | 1.415     | IPI:IPI00796945.2 |
| 31 | 0   | 1.4  | 1.415     | IPI:IPI00008524.1 |
| 31 | 0   | 1.4  | 1.49      | IPI:IPI00909378.1 |
| 31 | 0   | 1.4  | 1.6450001 | IPI:IPI00410017.1 |
| 31 | 0   | 1.4  | 1.426     | IPI:IPI00301154.3 |
| 31 | 0   | 1.4  | 2.839     | IPI:IPI00794246.1 |

S16

| N  | Unused | Total | %Cov(95)  | Accession         |
|----|--------|-------|-----------|-------------------|
| 1  | 75.77  | 75.77 | 62.61     | IPI:IPI00022463.1 |
| 2  | 29.24  | 29.24 | 23.09     | IPI:IPI00304925.5 |
| 2  | 0      | 29.22 | 23.09     | IPI:IPI00845339.1 |
| 3  | 23.07  | 23.07 | 18.709999 | IPI:IPI00966829.1 |
| 3  | 0      | 23.07 | 18.56     | IPI:IPI00745872.2 |
| 3  | 0      | 23.07 | 18.02     | IPI:IPI00022434.4 |
| 3  | 0      | 21.11 | 19.89     | IPI:IPI00908876.1 |
| 4  | 21.81  | 21.81 | 20.550001 | IPI:IPI00942979.1 |
| 4  | 0      | 21.81 | 23.7      | IPI:IPI00792641.1 |
| 4  | 0      | 21.81 | 20.290001 | IPI:IPI00643920.3 |
| 4  | 0      | 21.81 | 28.009999 | IPI:IPI00940673.1 |
| 5  | 13.4   | 18.42 | 18.269999 | IPI:IPI00003865.1 |
| 5  | 0      | 16.12 | 21.699999 | IPI:IPI00939595.1 |
| 5  | 0      | 16.12 | 21.66     | IPI:IPI00037070.3 |
| 6  | 12.75  | 12.75 | 21.21     | IPI:IPI00022488.1 |
| 7  | 9.38   | 9.38  | 10.06     | IPI:IPI00020127.1 |
| 8  | 6.43   | 6.43  | 6.284     | IPI:IPI00893179.1 |
| 8  | 0      | 6.43  | 5.7470001 | IPI:IPI00644712.4 |
| 8  | 0      | 5.27  | 6.261     | IPI:IPI00893062.1 |
| 8  | 0      | 4.43  | 2.9929999 | IPI:IPI00889791.1 |
| 9  | 6.34   | 6.34  | 4.1469999 | IPI:IPI00010471.5 |
| 10 | 6.01   | 6.01  | 10.12     | IPI:IPI00784154.1 |
| 10 | 0      | 4.01  | 8.3169997 | IPI:IPI00917575.2 |
| 11 | 5.39   | 5.39  | 3.8010001 | IPI:IPI00029111.3 |
| 11 | 0      | 4.88  | 4.5609999 | IPI:IPI00872788.1 |
| 12 | 5.31   | 5.31  | 5.7750002 | IPI:IPI00604620.3 |
| 12 | 0      | 5.31  | 6.7989998 | IPI:IPI00444262.3 |
| 13 | 3.56   | 3.56  | 4.2350002 | IPI:IPI00644087.1 |
| 13 | 0      | 3.56  | 4.101     | IPI:IPI00216953.1 |
| 13 | 0      | 3.56  | 4.5449998 | IPI:IPI00216952.1 |
| 13 | 0      | 3.56  | 3.9159998 | IPI:IPI00021405.3 |
| 13 | 0      | 3.56  | 4.6020001 | IPI:IPI00965833.1 |
| 13 | 0      | 3.56  | 5.339     | IPI:IPI00655812.1 |
| 13 | 0      | 3.56  | 5.2949999 | IPI:IPI00514817.5 |
| 13 | 0      | 3.56  | 5.068     | IPI:IPI00514320.3 |
| 13 | 0      | 3.56  | 5.5909999 | IPI:IPI00514204.3 |

|    |      |      |           |                   |
|----|------|------|-----------|-------------------|
| 13 | 0    | 3.56 | 4.5299999 | IPI:IPI00910241.1 |
| 14 | 3.52 | 6.14 | 7.023     | IPI:IPI00003362.2 |
| 15 | 3.52 | 4.51 | 4.1340001 | IPI:IPI00032304.2 |
| 15 | 0    | 4.56 | 3.8139999 | IPI:IPI00947227.2 |
| 15 | 0    | 4.56 | 3.6509998 | IPI:IPI00216694.3 |
| 15 | 0    | 2.51 | 4.5109998 | IPI:IPI00945930.1 |
| 15 | 0    | 2    | 6.3160002 | IPI:IPI00947454.1 |
| 16 | 2.41 | 2.41 | 2.186     | IPI:IPI00220834.8 |
| 16 | 0    | 2    | 14.29     | IPI:IPI00925823.1 |
| 16 | 0    | 2    | 12.21     | IPI:IPI00871391.3 |
| 17 | 2.19 | 2.19 | 2.9410001 | IPI:IPI00550364.8 |
| 18 | 2.17 | 2.17 | 2.6319999 | IPI:IPI00025874.2 |
| 18 | 0    | 2    | 2.926     | IPI:IPI00793589.2 |
| 19 | 2.09 | 2.09 | 3.6010001 | IPI:IPI00219077.4 |
| 19 | 0    | 1.97 | 4.0970001 | IPI:IPI00514090.2 |
| 20 | 2.03 | 2.03 | 0         | IPI:IPI00479946.3 |
| 20 | 0    | 2.03 | 0         | IPI:IPI00908463.1 |
| 20 | 0    | 2.03 | 0         | IPI:IPI00013894.1 |
| 21 | 2.02 | 2.02 | 1.905     | IPI:IPI00604710.2 |
| 21 | 0    | 2.02 | 2.1129999 | IPI:IPI00554722.1 |
| 21 | 0    | 2.02 | 2.0029999 | IPI:IPI00554702.1 |
| 21 | 0    | 2.02 | 1.902     | IPI:IPI00554611.1 |
| 21 | 0    | 2.02 | 1.815     | IPI:IPI00554481.1 |
| 21 | 0    | 2.02 | 2.2679999 | IPI:IPI00027493.1 |
| 22 | 2    | 2    | 2.703     | IPI:IPI00289499.3 |
| 22 | 0    | 2    | 2.7070001 | IPI:IPI00925601.1 |
| 22 | 0    | 2    | 6.9260001 | IPI:IPI00926426.1 |
| 22 | 0    | 2    | 14.95     | IPI:IPI00927536.1 |
| 23 | 2    | 2    | 2.9060001 | IPI:IPI00023673.1 |
| 23 | 0    | 2    | 4.1060001 | IPI:IPI00908762.2 |
| 23 | 0    | 2    | 3.5050001 | IPI:IPI00902654.2 |
| 24 | 2    | 2    | 4.5570001 | IPI:IPI00472679.4 |
| 24 | 0    | 2    | 2.1400001 | IPI:IPI00176398.2 |
| 25 | 2    | 2    | 3.4000002 | IPI:IPI00005686.1 |
| 25 | 0    | 2    | 4.8020002 | IPI:IPI00554544.1 |
| 26 | 1.67 | 1.67 | 0         | IPI:IPI00300074.4 |
| 27 | 1.52 | 1.52 | 1.974     | IPI:IPI00465225.1 |
| 27 | 0    | 1.52 | 1.528     | IPI:IPI00027834.3 |
| 28 | 1.52 | 1.52 | 3.562     | IPI:IPI00156689.3 |

S17

| N | Unused | Total | %Cov(95)  | Accession         |
|---|--------|-------|-----------|-------------------|
| 1 | 53.36  | 53.36 | 58.569998 | IPI:IPI00479186.7 |
| 2 | 43.99  | 43.99 | 44.409999 | IPI:IPI00022463.1 |
| 3 | 35.36  | 35.36 | 33.329999 | IPI:IPI00554648.3 |
| 4 | 30.3   | 30.3  | 36.44     | IPI:IPI00025252.1 |
| 5 | 29.12  | 29.12 | 46.110001 | IPI:IPI00218914.5 |
| 6 | 20.69  | 20.69 | 26.570001 | IPI:IPI00010796.1 |
| 6 | 0      | 18.69 | 27.649999 | IPI:IPI00878551.2 |

|    |       |       |           |                    |
|----|-------|-------|-----------|--------------------|
| 7  | 18.55 | 18.55 | 26.159999 | IPI:IPI00027497.5  |
| 7  | 0     | 18.55 | 25.659999 | IPI:IPI00910781.1  |
| 7  | 0     | 18.53 | 27.44     | IPI:IPI00908881.2  |
| 8  | 15.69 | 15.69 | 23.74     | IPI:IPI00297779.7  |
| 9  | 15.44 | 15.44 | 18.81     | IPI:IPI00440493.2  |
| 9  | 0     | 13.44 | 16.57     | IPI:IPI00908963.1  |
| 10 | 14.95 | 14.95 | 14.18     | IPI:IPI00029111.3  |
| 10 | 0     | 14.95 | 17.020001 | IPI:IPI00872788.1  |
| 11 | 10.14 | 10.14 | 9.307     | IPI:IPI00784090.2  |
| 11 | 0     | 8.14  | 6.216     | IPI:IPI00302925.4  |
| 12 | 10.04 | 10.04 | 16.29     | IPI:IPI00910732.1  |
| 12 | 0     | 10.04 | 14.77     | IPI:IPI00554737.3  |
| 12 | 0     | 10.04 | 15.68     | IPI:IPI00908543.1  |
| 12 | 0     | 8.04  | 18.780001 | IPI:IPI00798040.1  |
| 12 | 0     | 8.04  | 15.13     | IPI:IPI00168184.8  |
| 13 | 9.81  | 9.81  | 10.99     | IPI:IPI00784154.1  |
| 14 | 9.48  | 9.48  | 15.790001 | IPI:IPI00008274.7  |
| 14 | 0     | 8.11  | 37.130001 | IPI:IPI00647351.1  |
| 14 | 0     | 8.11  | 34.88     | IPI:IPI00646869.1  |
| 14 | 0     | 8.11  | 42.609999 | IPI:IPI00646269.1  |
| 14 | 0     | 8.11  | 36.059999 | IPI:IPI00644589.1  |
| 14 | 0     | 8.11  | 41.670001 | IPI:IPI00644109.1  |
| 14 | 0     | 8.11  | 43.099999 | IPI:IPI00642414.1  |
| 14 | 0     | 8.11  | 36.950001 | IPI:IPI00641881.1  |
| 14 | 0     | 7.48  | 10.97     | IPI:IPI00639931.2  |
| 15 | 9.38  | 9.38  | 12.630001 | IPI:IPI00952607.1  |
| 15 | 0     | 9.38  | 11.6      | IPI:IPI00018465.1  |
| 15 | 0     | 7.38  | 8.1840001 | IPI:IPI00552072.2  |
| 15 | 0     | 7.38  | 8.9910001 | IPI:IPI00952671.1  |
| 16 | 7.52  | 7.52  | 13.91     | IPI:IPI00020599.1  |
| 17 | 7.44  | 7.44  | 10        | IPI:IPI00747810.2  |
| 17 | 0     | 7.44  | 10.14     | IPI:IPI00163187.10 |
| 18 | 7.41  | 7.41  | 9.1739997 | IPI:IPI00553185.2  |
| 18 | 0     | 7.41  | 9.1909997 | IPI:IPI00290770.3  |
| 18 | 0     | 7.4   | 9.8619998 | IPI:IPI00552715.1  |
| 19 | 7.37  | 7.37  | 10.31     | IPI:IPI00965722.1  |
| 19 | 0     | 7.37  | 10.29     | IPI:IPI00964855.1  |
| 19 | 0     | 7.37  | 9.7970001 | IPI:IPI00010720.1  |
| 19 | 0     | 7.03  | 10.54     | IPI:IPI00965269.1  |
| 19 | 0     | 7.03  | 10.19     | IPI:IPI00964079.1  |
| 19 | 0     | 5.37  | 6.7900002 | IPI:IPI00940257.1  |
| 20 | 7.31  | 7.31  | 14.68     | IPI:IPI00004968.1  |
| 21 | 6.64  | 6.64  | 9.9650003 | IPI:IPI00939854.1  |
| 21 | 0     | 6.64  | 9.3900003 | IPI:IPI00873622.3  |
| 21 | 0     | 6.64  | 9.4059996 | IPI:IPI00746165.2  |
| 22 | 6.22  | 6.22  | 7.8189999 | IPI:IPI00552590.1  |
| 22 | 0     | 6.22  | 7.1560003 | IPI:IPI00027626.3  |
| 23 | 6.09  | 6.09  | 9.843     | IPI:IPI00939504.1  |
| 23 | 0     | 6.09  | 9.6709996 | IPI:IPI00873223.2  |

|    |      |      |           |                   |
|----|------|------|-----------|-------------------|
| 23 | 0    | 6.09 | 10.06     | IPI:IPI00395676.1 |
| 23 | 0    | 6.09 | 9.843     | IPI:IPI00329331.6 |
| 23 | 0    | 4.09 | 17.14     | IPI:IPI00946873.1 |
| 23 | 0    | 4.09 | 14.08     | IPI:IPI00946647.1 |
| 23 | 0    | 4.09 | 20        | IPI:IPI00945711.1 |
| 23 | 0    | 4.09 | 18.629999 | IPI:IPI00945562.1 |
| 23 | 0    | 4.09 | 17.54     | IPI:IPI00945447.1 |
| 24 | 5.4  | 5.4  | 11.85     | IPI:IPI00910458.1 |
| 24 | 0    | 5.4  | 11.82     | IPI:IPI00807545.1 |
| 24 | 0    | 5.4  | 12.15     | IPI:IPI00514561.1 |
| 24 | 0    | 5.4  | 11.21     | IPI:IPI00216746.1 |
| 24 | 0    | 5.4  | 11.23     | IPI:IPI00216049.1 |
| 24 | 0    | 3.7  | 9.4769999 | IPI:IPI00640296.1 |
| 25 | 5.32 | 5.32 | 4.8560001 | IPI:IPI00290566.1 |
| 25 | 0    | 5.27 | 6.7330003 | IPI:IPI00550591.1 |
| 26 | 4.68 | 4.68 | 7.818     | IPI:IPI00334175.3 |
| 26 | 0    | 4.68 | 7.7200003 | IPI:IPI00183626.8 |
| 26 | 0    | 4.68 | 8.0980003 | IPI:IPI00179964.5 |
| 26 | 0    | 2.68 | 6.0789999 | IPI:IPI00556157.1 |
| 27 | 4.19 | 4.19 | 9.7400002 | IPI:IPI00022488.1 |
| 28 | 4.05 | 4.05 | 6.1620001 | IPI:IPI00607801.2 |
| 28 | 0    | 4.05 | 6.1840001 | IPI:IPI00607693.2 |
| 28 | 0    | 4.05 | 6.1730001 | IPI:IPI00010180.4 |
| 29 | 4.04 | 4.04 | 4.5570001 | IPI:IPI00332499.1 |
| 29 | 0    | 4.04 | 4.569     | IPI:IPI00179953.2 |
| 29 | 0    | 4.04 | 8.0179997 | IPI:IPI00219821.3 |
| 29 | 0    | 2.04 | 8.7789997 | IPI:IPI00639912.1 |
| 29 | 0    | 2.04 | 8.9149997 | IPI:IPI00514504.1 |
| 30 | 4    | 4    | 6.5760002 | IPI:IPI00893190.2 |
| 30 | 0    | 4    | 6.2909998 | IPI:IPI00295542.5 |
| 30 | 0    | 4    | 9.8310001 | IPI:IPI00892657.1 |
| 30 | 0    | 4    | 11.07     | IPI:IPI00892540.1 |
| 30 | 0    | 2    | 12.899999 | IPI:IPI00953072.1 |
| 30 | 0    | 2    | 14.41     | IPI:IPI00893068.1 |
| 30 | 0    | 2    | 5.9700001 | IPI:IPI00892782.1 |
| 31 | 3.52 | 3.52 | 5.0560001 | IPI:IPI00011603.2 |
| 32 | 3.31 | 3.31 | 2.43      | IPI:IPI00856037.1 |
| 32 | 0    | 3.31 | 2.0439999 | IPI:IPI00644055.3 |
| 32 | 0    | 3.31 | 2.0409999 | IPI:IPI00941649.1 |
| 32 | 0    | 3.31 | 2.444     | IPI:IPI00910614.1 |
| 32 | 0    | 3.31 | 2.1849999 | IPI:IPI00856038.2 |
| 32 | 0    | 3.31 | 2.0540001 | IPI:IPI00012074.3 |
| 33 | 2.82 | 2.82 | 1.804     | IPI:IPI00642548.2 |
| 33 | 0    | 2.82 | 1.6890001 | IPI:IPI00011200.5 |
| 34 | 2.74 | 2.74 | 2.637     | IPI:IPI00921414.1 |
| 34 | 0    | 2.74 | 2.5289999 | IPI:IPI00893358.1 |
| 34 | 0    | 2.74 | 2.4119999 | IPI:IPI00302927.6 |
| 35 | 2.59 | 2.59 | 2.679     | IPI:IPI00908449.1 |
| 35 | 0    | 2.59 | 2.3949999 | IPI:IPI00029764.1 |

|    |      |       |           |                   |
|----|------|-------|-----------|-------------------|
| 36 | 2.4  | 2.4   | 2.98      | IPI:IPI00024403.1 |
| 37 | 2.2  | 2.2   | 3.3039998 | IPI:IPI00965913.1 |
| 37 | 0    | 2.2   | 3.2680001 | IPI:IPI00965074.1 |
| 37 | 0    | 2.2   | 2.868     | IPI:IPI00908876.1 |
| 37 | 0    | 2.2   | 3.036     | IPI:IPI00878517.1 |
| 37 | 0    | 2.2   | 2.4630001 | IPI:IPI00745872.2 |
| 37 | 0    | 2.2   | 2.392     | IPI:IPI00022434.4 |
| 37 | 0    | 2.2   | 2.483     | IPI:IPI00966829.1 |
| 37 | 0    | 2.04  | 3.5969999 | IPI:IPI00953582.1 |
| 37 | 0    | 2.04  | 3.5969999 | IPI:IPI00384697.2 |
| 37 | 0    | 2.01  | 3.788     | IPI:IPI00216773.4 |
| 38 | 2.14 | 2.14  | 3.104     | IPI:IPI00930688.1 |
| 38 | 0    | 2.14  | 3.204     | IPI:IPI00873427.1 |
| 38 | 0    | 2.14  | 3.365     | IPI:IPI00792677.1 |
| 38 | 0    | 2.14  | 5.4469999 | IPI:IPI00478908.3 |
| 38 | 0    | 2.14  | 2.6969999 | IPI:IPI00387144.5 |
| 38 | 0    | 2.14  | 3.118     | IPI:IPI00218343.4 |
| 38 | 0    | 2.02  | 3.2329999 | IPI:IPI00794663.1 |
| 38 | 0    | 2.02  | 5.263     | IPI:IPI00335314.3 |
| 38 | 0    | 2.02  | 3.125     | IPI:IPI00007750.1 |
| 38 | 0    | 2     | 2.923     | IPI:IPI00952875.1 |
| 38 | 0    | 2     | 5.263     | IPI:IPI00942772.1 |
| 38 | 0    | 2     | 8.9740001 | IPI:IPI00916391.1 |
| 38 | 0    | 2     | 4.1790001 | IPI:IPI00793930.1 |
| 38 | 0    | 2     | 3.655     | IPI:IPI00792478.1 |
| 38 | 0    | 2     | 2.998     | IPI:IPI00791613.1 |
| 38 | 0    | 2     | 3.118     | IPI:IPI00646909.2 |
| 38 | 0    | 2     | 5.8090001 | IPI:IPI00017454.4 |
| 39 | 2.13 | 2.13  | 2.6219999 | IPI:IPI00031121.2 |
| 39 | 0    | 1.52  | 10.79     | IPI:IPI00968280.1 |
| 39 | 0    | 1.52  | 9.5540002 | IPI:IPI00967442.1 |
| 39 | 0    | 1.52  | 8.3800003 | IPI:IPI00853537.1 |
| 40 | 2.11 | 2.11  | 0         | IPI:IPI00855856.2 |
| 40 | 0    | 2.11  | 0         | IPI:IPI00555572.1 |
| 40 | 0    | 2.11  | 0         | IPI:IPI00554742.3 |
| 40 | 0    | 2.11  | 0         | IPI:IPI00555743.1 |
| 41 | 2.06 | 2.06  | 2.0950001 | IPI:IPI00646813.1 |
| 41 | 0    | 2.06  | 2.06      | IPI:IPI00646322.1 |
| 41 | 0    | 2.06  | 2.124     | IPI:IPI00642416.1 |
| 41 | 0    | 2.06  | 2.045     | IPI:IPI00019450.2 |
| 41 | 0    | 2.06  | 5.3660002 | IPI:IPI00219287.1 |
| 42 | 2.01 | 47.38 | 45.449999 | IPI:IPI00941899.1 |
| 42 | 0    | 47.38 | 51.789999 | IPI:IPI00220644.8 |
| 42 | 0    | 43.38 | 48.339999 | IPI:IPI00909560.1 |
| 42 | 0    | 28    | 45.08     | IPI:IPI00604528.3 |
| 43 | 2    | 6.95  | 5.1240001 | IPI:IPI00220327.4 |
| 44 | 2    | 5.47  | 10.85     | IPI:IPI00939159.2 |
| 45 | 2    | 2     | 4.628     | IPI:IPI00967892.1 |
| 45 | 0    | 2     | 3.7459999 | IPI:IPI00885213.1 |



|    |      |      |           |                    |
|----|------|------|-----------|--------------------|
| 45 | 0    | 2    | 3.5330001 | IPI:IPI00884896.2  |
| 45 | 0    | 2    | 4.236     | IPI:IPI00871867.2  |
| 45 | 0    | 2    | 4.174     | IPI:IPI00847482.5  |
| 45 | 0    | 2    | 3.8460001 | IPI:IPI00783641.4  |
| 45 | 0    | 2    | 4.6089999 | IPI:IPI00554786.5  |
| 46 | 2    | 2    | 2.1400001 | IPI:IPI00291510.3  |
| 46 | 0    | 2    | 2.3399999 | IPI:IPI00925196.1  |
| 46 | 0    | 2    | 5.5840001 | IPI:IPI00791628.1  |
| 47 | 2    | 2    | 2.2059999 | IPI:IPI00798375.2  |
| 47 | 0    | 2    | 1.9540001 | IPI:IPI00017617.1  |
| 47 | 0    | 2    | 1.84      | IPI:IPI00952778.1  |
| 47 | 0    | 2    | 1.84      | IPI:IPI00947363.1  |
| 47 | 0    | 2    | 1.6419999 | IPI:IPI00940000.1  |
| 47 | 0    | 2    | 1.646     | IPI:IPI00889541.2  |
| 47 | 0    | 2    | 2.857     | IPI:IPI00879638.2  |
| 47 | 0    | 2    | 1.84      | IPI:IPI00651677.1  |
| 47 | 0    | 2    | 1.84      | IPI:IPI00651653.1  |
| 48 | 2    | 2    | 2.0330001 | IPI:IPI00019472.4  |
| 49 | 2    | 2    | 4.4989999 | IPI:IPI00967106.1  |
| 49 | 0    | 2    | 4.8999999 | IPI:IPI00965198.1  |
| 49 | 0    | 2    | 4.6909999 | IPI:IPI00908779.1  |
| 49 | 0    | 2    | 4.3219998 | IPI:IPI00021808.3  |
| 49 | 0    | 2    | 7.006     | IPI:IPI00940549.1  |
| 49 | 0    | 2    | 5.57      | IPI:IPI00911023.1  |
| 49 | 0    | 2    | 5.057     | IPI:IPI00910697.1  |
| 49 | 0    | 2    | 6.8750001 | IPI:IPI00909075.1  |
| 50 | 2    | 2    | 4.0619999 | IPI:IPI00399307.2  |
| 50 | 0    | 2    | 4.2339999 | IPI:IPI00001593.1  |
| 51 | 2    | 2    | 4.1669998 | IPI:IPI00220562.3  |
| 52 | 1.7  | 4.05 | 4.0589999 | IPI:IPI00956313.1  |
| 52 | 0    | 4.05 | 3.9009999 | IPI:IPI00930073.1  |
| 52 | 0    | 4.05 | 3.9009999 | IPI:IPI00299145.9  |
| 52 | 0    | 4.03 | 4.0589999 | IPI:IPI00942257.1  |
| 52 | 0    | 4.03 | 4.112     | IPI:IPI00909059.5  |
| 52 | 0    | 4.03 | 3.9009999 | IPI:IPI00300725.7  |
| 52 | 0    | 4.03 | 3.9009999 | IPI:IPI00293665.9  |
| 52 | 0    | 3.73 | 3.8800001 | IPI:IPI00796776.1  |
| 52 | 0    | 3.73 | 3.7289999 | IPI:IPI00009867.3  |
| 52 | 0    | 2.77 | 1.983     | IPI:IPI00939892.1  |
| 52 | 0    | 2.77 | 2.1779999 | IPI:IPI00005859.5  |
| 52 | 0    | 2.03 | 2.2810001 | IPI:IPI00910738.1  |
| 52 | 0    | 1.79 | 2.2430001 | IPI:IPI00241841.10 |
| 52 | 0    | 1.73 | 1.86      | IPI:IPI00021304.1  |
| 53 | 1.52 | 1.52 | 3.3829998 | IPI:IPI00930124.1  |
| 53 | 0    | 1.52 | 3.712     | IPI:IPI00956528.1  |
| 53 | 0    | 1.52 | 3.39      | IPI:IPI00876888.1  |
| 53 | 0    | 1.52 | 4.2440001 | IPI:IPI00827754.3  |
| 53 | 0    | 1.52 | 3.4329999 | IPI:IPI00816314.1  |
| 53 | 0    | 1.52 | 3.441     | IPI:IPI00785084.2  |

|    |      |      |           |                   |
|----|------|------|-----------|-------------------|
| 53 | 0    | 1.52 | 3.3679999 | IPI:IPI00784842.1 |
| 53 | 0    | 1.52 | 3.3679999 | IPI:IPI00784817.1 |
| 53 | 0    | 1.52 | 3.39      | IPI:IPI00645363.2 |
| 53 | 0    | 1.52 | 4.0100001 | IPI:IPI00448925.6 |
| 53 | 0    | 1.52 | 3.3259999 | IPI:IPI00423466.1 |
| 53 | 0    | 1.52 | 3.3679999 | IPI:IPI00423464.1 |
| 53 | 0    | 1.52 | 3.3330001 | IPI:IPI00423463.1 |
| 53 | 0    | 1.52 | 3.0889999 | IPI:IPI00418153.1 |
| 53 | 0    | 1.52 | 3.3199999 | IPI:IPI00384938.1 |
| 53 | 0    | 1.52 | 3.1429999 | IPI:IPI00168728.1 |
| 54 | 1.51 | 1.51 | 2.799     | IPI:IPI00514587.1 |
| 54 | 0    | 1.51 | 2.918     | IPI:IPI00220637.5 |

S18

| N  | Unused | Total | %Cov(95)  | Accession          |
|----|--------|-------|-----------|--------------------|
| 1  | 44.34  | 44.34 | 43.270001 | IPI:IPI00022463.1  |
| 2  | 35.82  | 35.82 | 51.239997 | IPI:IPI00007752.1  |
| 3  | 31.5   | 31.5  | 55.53     | IPI:IPI00465248.5  |
| 4  | 30.34  | 30.34 | 49.89     | IPI:IPI00180675.4  |
| 5  | 30.14  | 30.14 | 26.089999 | IPI:IPI00554648.3  |
| 6  | 20.13  | 20.13 | 28.569999 | IPI:IPI00396485.3  |
| 6  | 0      | 18.43 | 23.59     | IPI:IPI00472724.1  |
| 7  | 19.47  | 19.47 | 28.169999 | IPI:IPI00303476.1  |
| 8  | 18.86  | 18.86 | 29.210001 | IPI:IPI00940148.1  |
| 8  | 0      | 18.86 | 28.95     | IPI:IPI00031461.2  |
| 9  | 13.67  | 13.67 | 13.73     | IPI:IPI00937615.2  |
| 9  | 0      | 11.97 | 9.6510001 | IPI:IPI00000875.7  |
| 10 | 13.48  | 13.48 | 22.11     | IPI:IPI00177728.3  |
| 11 | 12.51  | 12.51 | 16.98     | IPI:IPI00554788.5  |
| 12 | 11.08  | 11.08 | 20.389999 | IPI:IPI00021187.4  |
| 13 | 10.82  | 10.82 | 17.749999 | IPI:IPI00022488.1  |
| 14 | 10.33  | 10.33 | 21.529999 | IPI:IPI00006114.4  |
| 15 | 9.94   | 9.94  | 12.01     | IPI:IPI00219525.10 |
| 16 | 9.73   | 9.73  | 14.560001 | IPI:IPI00465044.2  |
| 17 | 8.8    | 8.8   | 15.369999 | IPI:IPI00645329.1  |
| 17 | 0      | 8.8   | 14.820001 | IPI:IPI00328319.8  |
| 17 | 0      | 6.8   | 11.56     | IPI:IPI00877934.1  |
| 18 | 8.41   | 8.41  | 14.62     | IPI:IPI00797545.2  |
| 18 | 0      | 8.41  | 15.22     | IPI:IPI00789029.1  |
| 18 | 0      | 8.41  | 14.32     | IPI:IPI00023860.1  |
| 18 | 0      | 6.89  | 13.62     | IPI:IPI00902909.1  |
| 19 | 7.7    | 31.52 | 50.470001 | IPI:IPI00645452.1  |
| 19 | 0      | 27.52 | 42.24     | IPI:IPI00909140.7  |
| 19 | 0      | 19.51 | 40.689999 | IPI:IPI00908770.1  |
| 19 | 0      | 16.27 | 52.670002 | IPI:IPI00953417.1  |
| 20 | 7.34   | 7.34  | 8.8940002 | IPI:IPI00909766.1  |
| 20 | 0      | 7.34  | 8.1349999 | IPI:IPI00002134.4  |
| 21 | 7.34   | 7.34  | 9.5030002 | IPI:IPI00009104.7  |
| 22 | 6.81   | 6.81  | 5.8010001 | IPI:IPI00414676.6  |

|    |      |       |           |                   |
|----|------|-------|-----------|-------------------|
| 23 | 6.62 | 6.62  | 8.0169998 | IPI:IPI00010706.1 |
| 23 | 0    | 4.62  | 6.8870001 | IPI:IPI00915302.1 |
| 24 | 6.35 | 6.35  | 10.53     | IPI:IPI00026833.4 |
| 25 | 6.05 | 6.05  | 12.19     | IPI:IPI00916802.1 |
| 25 | 0    | 6.05  | 10.78     | IPI:IPI00009032.1 |
| 26 | 5.54 | 5.54  | 5.5160001 | IPI:IPI00020599.1 |
| 27 | 5.49 | 5.49  | 4.2350002 | IPI:IPI00644087.1 |
| 27 | 0    | 5.49  | 4.101     | IPI:IPI00216953.1 |
| 27 | 0    | 5.49  | 4.5449998 | IPI:IPI00216952.1 |
| 27 | 0    | 5.49  | 3.9159998 | IPI:IPI00021405.3 |
| 27 | 0    | 5.49  | 5.339     | IPI:IPI00655812.1 |
| 27 | 0    | 5.49  | 5.5909999 | IPI:IPI00514204.3 |
| 27 | 0    | 5.49  | 4.6020001 | IPI:IPI00965833.1 |
| 27 | 0    | 5.49  | 4.5299999 | IPI:IPI00910241.1 |
| 27 | 0    | 5.49  | 5.2949999 | IPI:IPI00514817.5 |
| 27 | 0    | 5.49  | 5.068     | IPI:IPI00514320.3 |
| 28 | 4.48 | 31.46 | 45.840001 | IPI:IPI00031370.3 |
| 28 | 0    | 31.25 | 45.840001 | IPI:IPI00013475.1 |
| 29 | 4.32 | 4.32  | 9.4219998 | IPI:IPI00759715.1 |
| 29 | 0    | 4.32  | 8.6269997 | IPI:IPI00296053.3 |
| 30 | 3.75 | 3.75  | 5.7879999 | IPI:IPI00218914.5 |
| 30 | 0    | 3.7   | 12.18     | IPI:IPI00644628.2 |
| 30 | 0    | 3.7   | 12.61     | IPI:IPI00644077.2 |
| 30 | 0    | 3.7   | 14.29     | IPI:IPI00642144.2 |
| 30 | 0    | 1.75  | 4.1030001 | IPI:IPI00910463.1 |
| 31 | 3.4  | 29.74 | 49.89     | IPI:IPI00930688.1 |
| 31 | 0    | 29.74 | 54.089999 | IPI:IPI00792677.1 |
| 31 | 0    | 26.65 | 40.979999 | IPI:IPI00218343.4 |
| 31 | 0    | 25.75 | 60.299999 | IPI:IPI00793930.1 |
| 31 | 0    | 24.95 | 33.53     | IPI:IPI00387144.5 |
| 31 | 0    | 22.44 | 39.489999 | IPI:IPI00794663.1 |
| 31 | 0    | 22.44 | 38.170001 | IPI:IPI00007750.1 |
| 31 | 0    | 18.49 | 27.35     | IPI:IPI00952875.1 |
| 31 | 0    | 18.49 | 28.049999 | IPI:IPI00791613.1 |
| 31 | 0    | 18.49 | 29.179999 | IPI:IPI00646909.2 |
| 31 | 0    | 18.49 | 34.200001 | IPI:IPI00792478.1 |
| 31 | 0    | 18.33 | 50.580001 | IPI:IPI00478908.3 |
| 31 | 0    | 15.74 | 23.800001 | IPI:IPI00873427.1 |
| 31 | 0    | 9.84  | 57.050002 | IPI:IPI00916391.1 |
| 31 | 0    | 8.73  | 18.42     | IPI:IPI00335314.3 |
| 31 | 0    | 6.17  | 15.04     | IPI:IPI00942772.1 |
| 31 | 0    | 6.16  | 16.599999 | IPI:IPI00017454.4 |
| 32 | 3.4  | 3.4   | 18.03     | IPI:IPI00967473.1 |
| 32 | 0    | 3.4   | 5.8669999 | IPI:IPI00020021.3 |
| 32 | 0    | 3.4   | 13.66     | IPI:IPI00966422.1 |
| 32 | 0    | 3.4   | 6.4520001 | IPI:IPI00942944.1 |
| 32 | 0    | 3.4   | 6.34      | IPI:IPI00909779.1 |
| 32 | 0    | 1.7   | 7.9470001 | IPI:IPI00968273.1 |
| 33 | 3.3  | 3.3   | 7.925     | IPI:IPI00908896.2 |

|    |      |       |           |                   |
|----|------|-------|-----------|-------------------|
| 33 | 0    | 3.3   | 7.203     | IPI:IPI00479191.2 |
| 33 | 0    | 3.3   | 7.5719997 | IPI:IPI00013881.6 |
| 33 | 0    | 2     | 10.12     | IPI:IPI00967216.1 |
| 33 | 0    | 2     | 8.0190003 | IPI:IPI00964535.1 |
| 33 | 0    | 2     | 4.208     | IPI:IPI00940955.1 |
| 33 | 0    | 2     | 3.7859999 | IPI:IPI00026230.1 |
| 34 | 2.51 | 2.51  | 3.376     | IPI:IPI00943173.1 |
| 34 | 0    | 2.51  | 3.036     | IPI:IPI00867509.1 |
| 34 | 0    | 2.51  | 3.661     | IPI:IPI00798401.2 |
| 35 | 2.18 | 2.18  | 6.1730001 | IPI:IPI00939560.1 |
| 35 | 0    | 2.18  | 5.556     | IPI:IPI00395646.2 |
| 35 | 0    | 2.18  | 4.6300001 | IPI:IPI00171438.2 |
| 36 | 2.04 | 6.04  | 5.7379998 | IPI:IPI00784295.2 |
| 36 | 0    | 6.04  | 7.7919997 | IPI:IPI00604607.2 |
| 36 | 0    | 6.04  | 4.9180001 | IPI:IPI00382470.3 |
| 37 | 2.03 | 2.03  | 3.909     | IPI:IPI00926319.1 |
| 37 | 0    | 2.03  | 4.1209999 | IPI:IPI00909143.1 |
| 37 | 0    | 2.03  | 3.7330002 | IPI:IPI00015911.2 |
| 38 | 2    | 21.87 | 15.06     | IPI:IPI00152453.1 |
| 38 | 0    | 21.87 | 26.67     | IPI:IPI00013683.2 |
| 38 | 0    | 19.87 | 27.779999 | IPI:IPI00640115.1 |
| 38 | 0    | 16.42 | 18.57     | IPI:IPI00646779.2 |
| 38 | 0    | 15.87 | 28.290001 | IPI:IPI00644620.1 |
| 39 | 2    | 5.27  | 3.4159999 | IPI:IPI00220327.4 |
| 40 | 2    | 2     | 3.218     | IPI:IPI00968296.1 |
| 40 | 0    | 2     | 3.073     | IPI:IPI00967460.1 |
| 40 | 0    | 2     | 2.9750001 | IPI:IPI00429191.3 |
| 40 | 0    | 2     | 10.83     | IPI:IPI00967974.1 |
| 40 | 0    | 2     | 13.680001 | IPI:IPI00964335.1 |
| 41 | 2    | 2     | 3.2749999 | IPI:IPI00910487.1 |
| 41 | 0    | 2     | 3.1099999 | IPI:IPI00032140.4 |
| 42 | 2    | 2     | 4.0709998 | IPI:IPI00470498.1 |
| 42 | 0    | 2     | 3.9799999 | IPI:IPI00470497.3 |
| 42 | 0    | 2     | 4.1340001 | IPI:IPI00412714.3 |
| 42 | 0    | 2     | 3.441     | IPI:IPI00410693.4 |
| 43 | 2    | 2     | 5.5050001 | IPI:IPI00916818.1 |
| 43 | 0    | 2     | 6.4060003 | IPI:IPI00909158.1 |
| 43 | 0    | 2     | 4.3170001 | IPI:IPI00169383.3 |
| 44 | 2    | 2     | 3.101     | IPI:IPI00910979.1 |
| 44 | 0    | 2     | 3.4929998 | IPI:IPI00847989.3 |
| 44 | 0    | 2     | 3.0130001 | IPI:IPI00479186.7 |
| 44 | 0    | 2     | 2.6450001 | IPI:IPI00941899.1 |
| 44 | 0    | 2     | 3.131     | IPI:IPI00909560.1 |
| 44 | 0    | 2     | 4.3960001 | IPI:IPI00888126.1 |
| 44 | 0    | 2     | 4.3719999 | IPI:IPI00604528.3 |
| 44 | 0    | 2     | 3.0130001 | IPI:IPI00220644.8 |
| 45 | 2    | 2     | 3.6839999 | IPI:IPI00301058.5 |
| 46 | 2    | 2     | 2.636     | IPI:IPI00910781.1 |
| 46 | 0    | 2     | 2.8200001 | IPI:IPI00908881.2 |

|    |      |      |           |                   |
|----|------|------|-----------|-------------------|
| 46 | 0    | 2    | 2.688     | IPI:IPI00027497.5 |
| 47 | 2    | 2    | 8.2610004 | IPI:IPI00796823.1 |
| 47 | 0    | 2    | 5.108     | IPI:IPI00796116.1 |
| 47 | 0    | 2    | 4.8840001 | IPI:IPI00795549.1 |
| 47 | 0    | 2    | 3.7110001 | IPI:IPI00654709.1 |
| 47 | 0    | 2    | 4.194     | IPI:IPI00296183.7 |
| 48 | 2    | 2    | 3.1819999 | IPI:IPI00644989.2 |
| 48 | 0    | 2    | 2.846     | IPI:IPI00299571.5 |
| 49 | 1.82 | 1.82 | 2.657     | IPI:IPI00795303.2 |
| 49 | 0    | 1.82 | 2.5760001 | IPI:IPI00003918.6 |
| 49 | 0    | 1.41 | 10.68     | IPI:IPI00792159.1 |
| 50 | 1.7  | 1.7  | 2.733     | IPI:IPI00910458.1 |
| 50 | 0    | 1.7  | 2.727     | IPI:IPI00807545.1 |
| 50 | 0    | 1.7  | 2.8039999 | IPI:IPI00514561.1 |
| 50 | 0    | 1.7  | 2.586     | IPI:IPI00216746.1 |
| 50 | 0    | 1.7  | 2.592     | IPI:IPI00216049.1 |
| 50 | 0    | 1.7  | 3.9220002 | IPI:IPI00640296.1 |
| 51 | 1.4  | 1.4  | 4.7169998 | IPI:IPI00887078.2 |
| 52 | 1.34 | 1.34 | 2.2779999 | IPI:IPI00018398.4 |

S19

| N  | Unused | Total | %Cov(95)  | Accession         |
|----|--------|-------|-----------|-------------------|
| 1  | 33.87  | 33.87 | 52.759999 | IPI:IPI00465248.5 |
| 2  | 19.6   | 19.6  | 27.75     | IPI:IPI00479145.2 |
| 3  | 19.59  | 19.59 | 15.530001 | IPI:IPI00554648.3 |
| 4  | 18.48  | 18.48 | 32.370001 | IPI:IPI00169383.3 |
| 5  | 16.48  | 16.48 | 36.520001 | IPI:IPI00930226.1 |
| 5  | 0      | 16.48 | 34.670001 | IPI:IPI00894498.1 |
| 5  | 0      | 16.48 | 34.670001 | IPI:IPI00021440.1 |
| 5  | 0      | 16.48 | 34.670001 | IPI:IPI00021439.1 |
| 5  | 0      | 14.48 | 28.490001 | IPI:IPI00894365.2 |
| 6  | 14.69  | 14.69 | 16.03     | IPI:IPI00006114.4 |
| 7  | 13.08  | 13.08 | 18.06     | IPI:IPI00012007.6 |
| 8  | 10.74  | 10.74 | 10.5      | IPI:IPI00796316.4 |
| 8  | 0      | 10.74 | 9.973     | IPI:IPI00647556.2 |
| 8  | 0      | 10.74 | 10.12     | IPI:IPI00646773.2 |
| 8  | 0      | 10.74 | 9.4630003 | IPI:IPI00026314.1 |
| 9  | 8.96   | 8.96  | 8.3760001 | IPI:IPI00299000.5 |
| 9  | 0      | 8.11  | 8.1280001 | IPI:IPI00807557.1 |
| 9  | 0      | 8.11  | 8.8710003 | IPI:IPI00794875.1 |
| 10 | 8.78   | 8.78  | 7.4069999 | IPI:IPI00815732.1 |
| 10 | 0      | 8.78  | 7.0950001 | IPI:IPI00217223.1 |
| 10 | 0      | 6.78  | 5.085     | IPI:IPI00964123.1 |
| 11 | 8.5    | 8.5   | 11.75     | IPI:IPI00930688.1 |
| 11 | 0      | 8.5   | 12.74     | IPI:IPI00792677.1 |
| 11 | 0      | 8.5   | 11.8      | IPI:IPI00218343.4 |
| 11 | 0      | 6.97  | 8.2850002 | IPI:IPI00387144.5 |
| 11 | 0      | 6.97  | 16.73     | IPI:IPI00478908.3 |
| 11 | 0      | 6.5   | 8.647     | IPI:IPI00180675.4 |

|    |      |      |           |                   |
|----|------|------|-----------|-------------------|
| 12 | 8.46 | 8.46 | 13.48     | IPI:IPI00409717.1 |
| 12 | 0    | 8.46 | 13.510001 | IPI:IPI00328328.3 |
| 12 | 0    | 6.46 | 11.33     | IPI:IPI00924536.1 |
| 13 | 8.14 | 8.14 | 10.17     | IPI:IPI00472724.1 |
| 13 | 0    | 8.14 | 10.17     | IPI:IPI00396485.3 |
| 13 | 0    | 8.13 | 10.66     | IPI:IPI00025447.8 |
| 13 | 0    | 8.13 | 11.9      | IPI:IPI00940393.1 |
| 14 | 8.04 | 8.04 | 11.59     | IPI:IPI00025366.4 |
| 15 | 7.57 | 7.57 | 15.52     | IPI:IPI00401264.5 |
| 16 | 7.54 | 7.54 | 11.35     | IPI:IPI00105598.3 |
| 17 | 7.41 | 7.41 | 14.1      | IPI:IPI00797545.2 |
| 17 | 0    | 7.41 | 14.669999 | IPI:IPI00789029.1 |
| 17 | 0    | 7.41 | 13.81     | IPI:IPI00023860.1 |
| 17 | 0    | 5.41 | 13        | IPI:IPI00902909.1 |
| 18 | 6.8  | 6.8  | 6.075     | IPI:IPI00848161.1 |
| 18 | 0    | 6.8  | 5.869     | IPI:IPI00641829.5 |
| 18 | 0    | 5.95 | 6.089     | IPI:IPI00940237.1 |
| 18 | 0    | 5.95 | 5.5319998 | IPI:IPI00644431.2 |
| 18 | 0    | 5.88 | 7.9269998 | IPI:IPI00893580.1 |
| 18 | 0    | 5.87 | 7.429     | IPI:IPI00792043.2 |
| 18 | 0    | 5.37 | 13.9      | IPI:IPI00939221.2 |
| 18 | 0    | 4.8  | 2.8240001 | IPI:IPI00790636.1 |
| 19 | 6.46 | 6.46 | 6.8769999 | IPI:IPI00022463.1 |
| 20 | 5.52 | 5.52 | 12.92     | IPI:IPI00001863.8 |
| 21 | 4.27 | 4.27 | 7.2829999 | IPI:IPI00941255.1 |
| 21 | 0    | 4.27 | 6.989     | IPI:IPI00654777.2 |
| 22 | 4    | 4    | 8.1579998 | IPI:IPI00026215.1 |
| 23 | 4    | 4    | 7.5120002 | IPI:IPI00645452.1 |
| 23 | 0    | 4    | 8.602     | IPI:IPI00647896.1 |
| 23 | 0    | 4    | 7.1910001 | IPI:IPI00007752.1 |
| 23 | 0    | 4    | 7.1910001 | IPI:IPI00930715.1 |
| 23 | 0    | 4    | 7.1910001 | IPI:IPI00031370.3 |
| 23 | 0    | 4    | 7.1910001 | IPI:IPI00013475.1 |
| 23 | 0    | 2.11 | 2.258     | IPI:IPI00152453.1 |
| 23 | 0    | 2.11 | 4.0270001 | IPI:IPI00646779.2 |
| 23 | 0    | 2.11 | 4.7619998 | IPI:IPI00640115.1 |
| 23 | 0    | 2.11 | 3.9999999 | IPI:IPI00013683.2 |
| 23 | 0    | 2    | 3.0169999 | IPI:IPI00909140.7 |
| 23 | 0    | 2    | 3.675     | IPI:IPI00643158.1 |
| 23 | 0    | 2    | 3.4230001 | IPI:IPI00641706.1 |
| 23 | 0    | 2    | 3.4230001 | IPI:IPI00956657.1 |
| 23 | 0    | 2    | 3.3489998 | IPI:IPI00908469.1 |
| 23 | 0    | 2    | 3.153     | IPI:IPI00023598.2 |
| 23 | 0    | 2    | 7.4069999 | IPI:IPI00953417.1 |
| 23 | 0    | 2    | 3.5259999 | IPI:IPI00930130.2 |
| 23 | 0    | 2    | 3.867     | IPI:IPI00926685.1 |
| 23 | 0    | 2    | 4.4160001 | IPI:IPI00908770.1 |
| 23 | 0    | 2    | 3.7629999 | IPI:IPI00739915.3 |
| 23 | 0    | 2    | 5.9319999 | IPI:IPI00956241.1 |

|    |      |      |           |                   |
|----|------|------|-----------|-------------------|
| 23 | 0    | 2    | 3.4400001 | IPI:IPI00945532.1 |
| 23 | 0    | 2    | 5.9319999 | IPI:IPI00909781.1 |
| 23 | 0    | 2    | 7.7780001 | IPI:IPI00877930.1 |
| 23 | 0    | 2    | 3.4150001 | IPI:IPI00514047.1 |
| 23 | 0    | 2    | 3.153     | IPI:IPI00292496.1 |
| 23 | 0    | 2    | 3.153     | IPI:IPI00174849.4 |
| 24 | 4    | 4    | 5.8940001 | IPI:IPI00299571.5 |
| 24 | 0    | 4    | 6.5909997 | IPI:IPI00644989.2 |
| 25 | 4    | 4    | 6.25      | IPI:IPI00916847.1 |
| 25 | 0    | 4    | 9.5239997 | IPI:IPI00908669.1 |
| 25 | 0    | 4    | 6.566     | IPI:IPI00290416.3 |
| 25 | 0    | 4    | 9.3529999 | IPI:IPI00216106.3 |
| 25 | 0    | 2    | 3.641     | IPI:IPI00916410.1 |
| 26 | 2.98 | 2.98 | 2.4429999 | IPI:IPI00644087.1 |
| 26 | 0    | 2.98 | 2.366     | IPI:IPI00216953.1 |
| 26 | 0    | 2.98 | 2.6219999 | IPI:IPI00216952.1 |
| 26 | 0    | 2.98 | 2.259     | IPI:IPI00021405.3 |
| 26 | 0    | 2.98 | 3.08      | IPI:IPI00655812.1 |
| 26 | 0    | 2.98 | 2.9239999 | IPI:IPI00514320.3 |
| 26 | 0    | 2.98 | 3.2260001 | IPI:IPI00514204.3 |
| 26 | 0    | 2.98 | 2.6550001 | IPI:IPI00965833.1 |
| 26 | 0    | 2.98 | 2.613     | IPI:IPI00910241.1 |
| 26 | 0    | 2.98 | 3.0549999 | IPI:IPI00514817.5 |
| 27 | 2.86 | 4.09 | 2.791     | IPI:IPI00554788.5 |
| 27 | 0    | 3.27 | 7.186     | IPI:IPI00794267.1 |
| 28 | 2.56 | 2.56 | 3.5399999 | IPI:IPI00011107.2 |
| 29 | 2.53 | 2.53 | 4.0959999 | IPI:IPI00003881.5 |
| 30 | 2.47 | 6.71 | 9.1130003 | IPI:IPI00025491.1 |
| 30 | 0    | 3.7  | 18.49     | IPI:IPI00910691.1 |
| 30 | 0    | 1.78 | 8.7300003 | IPI:IPI00955929.1 |
| 31 | 2.09 | 2.09 | 5.556     | IPI:IPI00395646.2 |
| 31 | 0    | 2.09 | 4.6300001 | IPI:IPI00171438.2 |
| 31 | 0    | 2.09 | 6.1730001 | IPI:IPI00939560.1 |
| 32 | 2.05 | 2.05 | 3.111     | IPI:IPI00020632.4 |
| 32 | 0    | 2.05 | 4.73      | IPI:IPI00909521.2 |
| 33 | 2    | 2    | 3.974     | IPI:IPI00305383.1 |
| 34 | 2    | 2    | 4.0879998 | IPI:IPI00023728.1 |
| 35 | 2    | 2    | 3.6789998 | IPI:IPI00916229.1 |
| 35 | 0    | 2    | 6.25      | IPI:IPI00909932.2 |
| 35 | 0    | 2    | 2.785     | IPI:IPI00010157.1 |
| 35 | 0    | 2    | 9.5650002 | IPI:IPI00909877.1 |
| 35 | 0    | 2    | 2.785     | IPI:IPI00021772.1 |
| 36 | 2    | 2    | 5.0129998 | IPI:IPI00922787.1 |
| 36 | 0    | 2    | 4.623     | IPI:IPI00065500.3 |
| 37 | 1.8  | 1.8  | 2.3809999 | IPI:IPI00013122.1 |
| 38 | 1.7  | 1.7  | 5.263     | IPI:IPI00936769.1 |
| 38 | 0    | 1.7  | 2.727     | IPI:IPI00892652.1 |
| 38 | 0    | 1.7  | 2.153     | IPI:IPI00007068.1 |
| 38 | 0    | 1.7  | 5.7689998 | IPI:IPI00908396.1 |

|    |      |      |           |                   |
|----|------|------|-----------|-------------------|
| 38 | 0    | 1.7  | 2.153     | IPI:IPI00028091.3 |
| 39 | 1.52 | 1.52 | 2.887     | IPI:IPI00022977.1 |
| 39 | 0    | 1.52 | 3.1789999 | IPI:IPI00908811.1 |
| 40 | 1.52 | 1.52 | 12.17     | IPI:IPI00641665.1 |
| 40 | 0    | 1.52 | 3.59      | IPI:IPI00005198.2 |
| 41 | 1.4  | 1.4  | 1.091     | IPI:IPI00021766.5 |
| 41 | 0    | 1.4  | 3.3160001 | IPI:IPI00478442.3 |
| 41 | 0    | 1.4  | 3.4850001 | IPI:IPI00298289.1 |

S20

| N  | Unused | Total | %Cov(95)  | Accession         |
|----|--------|-------|-----------|-------------------|
| 1  | 36.16  | 36.16 | 61.799997 | IPI:IPI00930226.1 |
| 1  | 0      | 36.16 | 58.670002 | IPI:IPI00021440.1 |
| 1  | 0      | 36.16 | 58.670002 | IPI:IPI00021439.1 |
| 2  | 32.31  | 32.31 | 51.200002 | IPI:IPI00796333.1 |
| 2  | 0      | 32.31 | 58.789998 | IPI:IPI00465439.5 |
| 3  | 21.02  | 21.02 | 37.799999 | IPI:IPI00022977.1 |
| 3  | 0      | 19.02 | 37.86     | IPI:IPI00908811.1 |
| 4  | 17.2   | 17.2  | 14.76     | IPI:IPI00022463.1 |
| 5  | 16.67  | 16.67 | 25.639999 | IPI:IPI00005198.2 |
| 6  | 16.12  | 16.12 | 14.69     | IPI:IPI00647556.2 |
| 6  | 0      | 16.12 | 14.910001 | IPI:IPI00646773.2 |
| 6  | 0      | 16.12 | 13.940001 | IPI:IPI00026314.1 |
| 7  | 12.34  | 12.34 | 14.5      | IPI:IPI00479145.2 |
| 8  | 10.25  | 10.25 | 19.149999 | IPI:IPI00749398.1 |
| 8  | 0      | 10.25 | 17.6      | IPI:IPI00413451.2 |
| 9  | 9.74   | 9.74  | 16.98     | IPI:IPI00023728.1 |
| 10 | 8.78   | 8.78  | 12.66     | IPI:IPI00027444.1 |
| 11 | 8.19   | 8.19  | 14.2      | IPI:IPI00916517.1 |
| 11 | 0      | 8.19  | 12.75     | IPI:IPI00396378.3 |
| 11 | 0      | 8.1   | 13.2      | IPI:IPI00414696.1 |
| 12 | 8.15   | 8.15  | 15.009999 | IPI:IPI00942520.1 |
| 12 | 0      | 8.15  | 15.449999 | IPI:IPI00914913.1 |
| 12 | 0      | 8.15  | 15.009999 | IPI:IPI00382516.5 |
| 12 | 0      | 8.15  | 15.270001 | IPI:IPI00215734.3 |
| 12 | 0      | 8.15  | 14.29     | IPI:IPI00018522.4 |
| 12 | 0      | 8.02  | 18.089999 | IPI:IPI00909470.1 |
| 13 | 6.88   | 6.88  | 13.88     | IPI:IPI00915340.1 |
| 13 | 0      | 6.88  | 13.590001 | IPI:IPI00220685.1 |
| 13 | 0      | 6.88  | 12.75     | IPI:IPI00220684.1 |
| 13 | 0      | 6.88  | 11.61     | IPI:IPI00220683.1 |
| 13 | 0      | 6.88  | 10.99     | IPI:IPI00028888.1 |
| 13 | 0      | 6.86  | 14.94     | IPI:IPI00964648.1 |
| 13 | 0      | 6.86  | 13.64     | IPI:IPI00903278.1 |
| 14 | 5.63   | 5.63  | 9.7949997 | IPI:IPI00910458.1 |
| 14 | 0      | 5.63  | 9.7730003 | IPI:IPI00807545.1 |
| 14 | 0      | 5.63  | 10.05     | IPI:IPI00514561.1 |
| 14 | 0      | 5.63  | 9.2670001 | IPI:IPI00216746.1 |
| 14 | 0      | 5.63  | 9.2869997 | IPI:IPI00216049.1 |



|    |      |      |           |                   |
|----|------|------|-----------|-------------------|
| 14 | 0    | 3.63 | 9.4769999 | IPI:IPI00640296.1 |
| 15 | 5.55 | 5.55 | 7.818     | IPI:IPI00334175.3 |
| 15 | 0    | 5.55 | 7.7200003 | IPI:IPI00183626.8 |
| 15 | 0    | 5.55 | 8.0980003 | IPI:IPI00179964.5 |
| 16 | 5.31 | 5.31 | 7.2460003 | IPI:IPI00554648.3 |
| 16 | 0    | 5.3  | 14.77     | IPI:IPI00793917.1 |
| 16 | 0    | 5.29 | 7.9010002 | IPI:IPI00787323.2 |
| 16 | 0    | 3.42 | 4.4089999 | IPI:IPI00017870.1 |
| 17 | 4.96 | 4.96 | 8.14      | IPI:IPI00018206.3 |
| 17 | 0    | 4.96 | 9.0439998 | IPI:IPI00910267.1 |
| 18 | 4.72 | 4.72 | 7.4069999 | IPI:IPI00396630.3 |
| 18 | 0    | 4.72 | 7.5800002 | IPI:IPI00217960.1 |
| 18 | 0    | 2.72 | 3.9889999 | IPI:IPI00395654.7 |
| 18 | 0    | 2.72 | 4.1299999 | IPI:IPI00739595.1 |
| 18 | 0    | 2.72 | 4.1420002 | IPI:IPI00739094.1 |
| 18 | 0    | 2.72 | 3.9439999 | IPI:IPI00738231.1 |
| 18 | 0    | 2.72 | 3.9549999 | IPI:IPI00737155.1 |
| 18 | 0    | 2.72 | 3.9110001 | IPI:IPI00645788.2 |
| 18 | 0    | 2.72 | 4.459     | IPI:IPI00514131.6 |
| 18 | 0    | 2.72 | 3.5179999 | IPI:IPI00376119.1 |
| 18 | 0    | 2.72 | 4.3480001 | IPI:IPI00877619.2 |
| 19 | 4.63 | 4.68 | 5.133     | IPI:IPI00965833.1 |
| 19 | 0    | 4.68 | 5.0519999 | IPI:IPI00910241.1 |
| 19 | 0    | 4.68 | 4.7230002 | IPI:IPI00644087.1 |
| 19 | 0    | 4.68 | 5.906     | IPI:IPI00514817.5 |
| 19 | 0    | 4.68 | 5.6529999 | IPI:IPI00514320.3 |
| 19 | 0    | 4.68 | 4.5740001 | IPI:IPI00216953.1 |
| 19 | 0    | 4.68 | 5.0700001 | IPI:IPI00216952.1 |
| 19 | 0    | 4.68 | 4.3669999 | IPI:IPI00021405.3 |
| 19 | 0    | 2.68 | 3.08      | IPI:IPI00655812.1 |
| 19 | 0    | 2.68 | 3.2260001 | IPI:IPI00514204.3 |
| 19 | 0    | 2.68 | 5.3849999 | IPI:IPI00965461.1 |
| 20 | 4.36 | 4.36 | 2.8039999 | IPI:IPI00848161.1 |
| 20 | 0    | 4.36 | 2.8240001 | IPI:IPI00790636.1 |
| 20 | 0    | 4.36 | 2.709     | IPI:IPI00641829.5 |
| 20 | 0    | 4.04 | 2.8100001 | IPI:IPI00940237.1 |
| 20 | 0    | 4.04 | 2.5529999 | IPI:IPI00644431.2 |
| 20 | 0    | 3.47 | 3.692     | IPI:IPI00894161.1 |
| 20 | 0    | 3.47 | 3.6589999 | IPI:IPI00893580.1 |
| 20 | 0    | 3.47 | 3.4290001 | IPI:IPI00792043.2 |
| 20 | 0    | 3.2  | 4.152     | IPI:IPI00643815.2 |
| 20 | 0    | 3.15 | 6.4170003 | IPI:IPI00939221.2 |
| 20 | 0    | 2.89 | 3.7269998 | IPI:IPI00166874.3 |
| 21 | 4.27 | 4.27 | 8.6790003 | IPI:IPI00917753.1 |
| 21 | 0    | 4.27 | 8.5819997 | IPI:IPI00896523.3 |
| 21 | 0    | 4.27 | 8.6139999 | IPI:IPI00844040.1 |
| 21 | 0    | 4.27 | 8.303     | IPI:IPI00301311.1 |
| 21 | 0    | 4.27 | 7.931     | IPI:IPI00072377.1 |
| 21 | 0    | 4.27 | 7.6159999 | IPI:IPI00735319.2 |

|    |      |      |           |                   |
|----|------|------|-----------|-------------------|
| 22 | 4    | 4    | 7.925     | IPI:IPI00908896.2 |
| 22 | 0    | 4    | 7.203     | IPI:IPI00479191.2 |
| 22 | 0    | 4    | 7.5719997 | IPI:IPI00013881.6 |
| 22 | 0    | 2.01 | 4.208     | IPI:IPI00940955.1 |
| 22 | 0    | 2.01 | 3.7859999 | IPI:IPI00026230.1 |
| 22 | 0    | 2    | 8.0190003 | IPI:IPI00964535.1 |
| 22 | 0    | 2    | 10.12     | IPI:IPI00967216.1 |
| 22 | 0    | 2    | 4.0959999 | IPI:IPI00003881.5 |
| 23 | 4    | 4    | 8.8500001 | IPI:IPI00455315.4 |
| 23 | 0    | 4    | 8.4030002 | IPI:IPI00418169.3 |
| 23 | 0    | 4    | 15.459999 | IPI:IPI00909509.1 |
| 23 | 0    | 4    | 13.699999 | IPI:IPI00797556.1 |
| 23 | 0    | 2    | 4.7200002 | IPI:IPI00334627.3 |
| 24 | 3.05 | 3.07 | 2.7899999 | IPI:IPI00418471.6 |
| 24 | 0    | 1.4  | 7.5139999 | IPI:IPI00552689.1 |
| 25 | 2.84 | 2.84 | 5.7379998 | IPI:IPI00005102.3 |
| 25 | 0    | 2.7  | 6.752     | IPI:IPI00643452.1 |
| 25 | 0    | 2.28 | 6.7089997 | IPI:IPI00642393.1 |
| 25 | 0    | 2.14 | 7.6360002 | IPI:IPI00909795.1 |
| 26 | 2.62 | 2.62 | 3.3939999 | IPI:IPI00793381.2 |
| 26 | 0    | 2.62 | 3.8559999 | IPI:IPI00014151.3 |
| 26 | 0    | 2.62 | 5.1720001 | IPI:IPI00795037.1 |
| 26 | 0    | 2    | 4.2860001 | IPI:IPI00946249.1 |
| 26 | 0    | 2    | 4.2739999 | IPI:IPI00794383.1 |
| 26 | 0    | 2    | 19.48     | IPI:IPI00793676.1 |
| 27 | 2.43 | 2.43 | 4.6069998 | IPI:IPI00744148.2 |
| 27 | 0    | 2.43 | 4.5699999 | IPI:IPI00304171.6 |
| 27 | 0    | 2.43 | 4.5820002 | IPI:IPI00059366.4 |
| 27 | 0    | 2.4  | 4.5699999 | IPI:IPI00220994.3 |
| 27 | 0    | 2.4  | 10.3      | IPI:IPI00966623.1 |
| 28 | 2.38 | 2.38 | 2.9410001 | IPI:IPI00409717.1 |
| 28 | 0    | 2.38 | 2.9479999 | IPI:IPI00328328.3 |
| 28 | 0    | 2.38 | 3.8460001 | IPI:IPI00030296.6 |
| 28 | 0    | 2.38 | 3.3149999 | IPI:IPI00924536.1 |
| 28 | 0    | 2.38 | 5.4790001 | IPI:IPI00788730.1 |
| 28 | 0    | 1.52 | 4.8       | IPI:IPI00794607.2 |
| 28 | 0    | 1.52 | 5.24      | IPI:IPI00793328.1 |
| 28 | 0    | 1.52 | 7.8429997 | IPI:IPI00793220.1 |
| 28 | 0    | 1.52 | 5.5050001 | IPI:IPI00790077.1 |
| 29 | 2.36 | 6.05 | 14.86     | IPI:IPI00418262.5 |
| 29 | 0    | 4.05 | 15.33     | IPI:IPI00922081.1 |
| 29 | 0    | 4.05 | 11.61     | IPI:IPI00792375.1 |
| 30 | 2.35 | 3.75 | 8.4810004 | IPI:IPI00966854.1 |
| 30 | 0    | 3.75 | 7.339     | IPI:IPI00964992.1 |
| 30 | 0    | 3.75 | 8.5709997 | IPI:IPI00964686.1 |
| 30 | 0    | 3.75 | 7.2949998 | IPI:IPI00742926.1 |
| 30 | 0    | 3.75 | 8.4210001 | IPI:IPI00334713.1 |
| 30 | 0    | 3.75 | 7.2290003 | IPI:IPI00334587.1 |
| 31 | 2.32 | 2.32 | 2.6529999 | IPI:IPI00549672.2 |

|    |      |      |           |                   |
|----|------|------|-----------|-------------------|
| 31 | 0    | 1.55 | 2.6459999 | IPI:IPI00375380.4 |
| 32 | 2.25 | 2.25 | 2.317     | IPI:IPI00930205.1 |
| 32 | 0    | 2.25 | 2.4669999 | IPI:IPI00402184.4 |
| 32 | 0    | 2.25 | 2.313     | IPI:IPI00402183.2 |
| 32 | 0    | 2.25 | 2.211     | IPI:IPI00402182.2 |
| 32 | 0    | 2.25 | 2.087     | IPI:IPI00018140.3 |
| 32 | 0    | 2.25 | 2.87      | IPI:IPI00966060.1 |
| 32 | 0    | 2.25 | 2.802     | IPI:IPI00402185.5 |
| 33 | 2.25 | 2.25 | 2.785     | IPI:IPI00940393.1 |
| 33 | 0    | 2.25 | 3.235     | IPI:IPI00556204.1 |
| 33 | 0    | 2.25 | 2.3809999 | IPI:IPI00472724.1 |
| 33 | 0    | 2.25 | 2.3809999 | IPI:IPI00396485.3 |
| 33 | 0    | 2.25 | 2.4940001 | IPI:IPI00025447.8 |
| 33 | 0    | 2.25 | 2.376     | IPI:IPI00014424.1 |
| 33 | 0    | 1.7  | 4.8459999 | IPI:IPI00382804.1 |
| 34 | 2.17 | 2.27 | 8.6139999 | IPI:IPI00879518.1 |
| 34 | 0    | 2.27 | 8.6139999 | IPI:IPI00797148.1 |
| 34 | 0    | 2.27 | 7.1649998 | IPI:IPI00760620.2 |
| 34 | 0    | 2.27 | 7.1869999 | IPI:IPI00644968.1 |
| 34 | 0    | 2.27 | 7.1869999 | IPI:IPI00465365.4 |
| 34 | 0    | 2.27 | 6.1829999 | IPI:IPI00215965.3 |
| 34 | 0    | 2.26 | 15.86     | IPI:IPI00797902.1 |
| 34 | 0    | 2.16 | 8.185     | IPI:IPI00176692.7 |
| 34 | 0    | 2.1  | 7.6920003 | IPI:IPI00742127.2 |
| 34 | 0    | 2    | 9.0549998 | IPI:IPI00909288.1 |
| 34 | 0    | 2    | 11.06     | IPI:IPI00908994.1 |
| 35 | 2.08 | 2.08 | 3.104     | IPI:IPI00930688.1 |
| 35 | 0    | 2.08 | 3.204     | IPI:IPI00873427.1 |
| 35 | 0    | 2.08 | 3.365     | IPI:IPI00792677.1 |
| 35 | 0    | 2.08 | 5.4469999 | IPI:IPI00478908.3 |
| 35 | 0    | 2.08 | 2.6969999 | IPI:IPI00387144.5 |
| 35 | 0    | 2.08 | 3.118     | IPI:IPI00218343.4 |
| 35 | 0    | 2.01 | 3.2329999 | IPI:IPI00794663.1 |
| 35 | 0    | 2.01 | 5.263     | IPI:IPI00335314.3 |
| 35 | 0    | 2.01 | 3.125     | IPI:IPI00007750.1 |
| 35 | 0    | 2    | 2.923     | IPI:IPI00952875.1 |
| 35 | 0    | 2    | 3.655     | IPI:IPI00792478.1 |
| 35 | 0    | 2    | 2.998     | IPI:IPI00791613.1 |
| 35 | 0    | 2    | 3.118     | IPI:IPI00646909.2 |
| 35 | 0    | 2    | 5.263     | IPI:IPI00942772.1 |
| 35 | 0    | 2    | 8.9740001 | IPI:IPI00916391.1 |
| 35 | 0    | 2    | 4.1790001 | IPI:IPI00793930.1 |
| 35 | 0    | 2    | 5.8090001 | IPI:IPI00017454.4 |
| 36 | 2.02 | 2.02 | 2.483     | IPI:IPI00966829.1 |
| 36 | 0    | 2.02 | 2.4630001 | IPI:IPI00745872.2 |
| 36 | 0    | 2.02 | 2.392     | IPI:IPI00022434.4 |
| 36 | 0    | 2.01 | 2.868     | IPI:IPI00908876.1 |
| 36 | 0    | 2.01 | 3.3039998 | IPI:IPI00965913.1 |
| 36 | 0    | 2.01 | 3.2680001 | IPI:IPI00965074.1 |

|    |      |       |           |                   |
|----|------|-------|-----------|-------------------|
| 36 | 0    | 2.01  | 3.036     | IPI:IPI00878517.1 |
| 36 | 0    | 2.01  | 3.788     | IPI:IPI00216773.4 |
| 36 | 0    | 2     | 3.5969999 | IPI:IPI00953582.1 |
| 36 | 0    | 2     | 3.5969999 | IPI:IPI00384697.2 |
| 37 | 2.02 | 2.02  | 5.2469999 | IPI:IPI00019927.2 |
| 38 | 2.01 | 2.01  | 9.8360002 | IPI:IPI00909207.1 |
| 38 | 0    | 2.01  | 9.0910003 | IPI:IPI00027350.3 |
| 38 | 0    | 2     | 13.240001 | IPI:IPI00794777.1 |
| 39 | 2    | 36.16 | 58.670002 | IPI:IPI00894498.1 |
| 39 | 0    | 36.16 | 58.670002 | IPI:IPI00021439.1 |
| 39 | 0    | 32.16 | 54.13     | IPI:IPI00894365.2 |
| 39 | 0    | 17.09 | 75.999999 | IPI:IPI00942659.1 |
| 39 | 0    | 15.09 | 77.780002 | IPI:IPI00894523.1 |
| 39 | 0    | 15.09 | 74.760002 | IPI:IPI00893981.1 |
| 39 | 0    | 11.09 | 62.5      | IPI:IPI00893604.1 |
| 40 | 2    | 2     | 3.593     | IPI:IPI00000013.1 |
| 41 | 2    | 2     | 4.6039999 | IPI:IPI00744507.1 |
| 41 | 0    | 2     | 4.6750002 | IPI:IPI00741317.1 |
| 41 | 0    | 2     | 4.5340002 | IPI:IPI00016613.2 |
| 41 | 0    | 2     | 4.6039999 | IPI:IPI00784195.1 |
| 42 | 2    | 2     | 3.7209999 | IPI:IPI00412737.1 |
| 42 | 0    | 2     | 3.3969998 | IPI:IPI00295400.1 |
| 43 | 2    | 2     | 3.4230001 | IPI:IPI00956657.1 |
| 43 | 0    | 2     | 5.9319999 | IPI:IPI00956241.1 |
| 43 | 0    | 2     | 3.1459998 | IPI:IPI00930715.1 |
| 43 | 0    | 2     | 3.5259999 | IPI:IPI00930130.2 |
| 43 | 0    | 2     | 3.867     | IPI:IPI00926685.1 |
| 43 | 0    | 2     | 5.9319999 | IPI:IPI00909781.1 |
| 43 | 0    | 2     | 3.0169999 | IPI:IPI00909140.7 |
| 43 | 0    | 2     | 4.4160001 | IPI:IPI00908770.1 |
| 43 | 0    | 2     | 3.3489998 | IPI:IPI00908469.1 |
| 43 | 0    | 2     | 3.7629999 | IPI:IPI00647896.1 |
| 43 | 0    | 2     | 3.286     | IPI:IPI00645452.1 |
| 43 | 0    | 2     | 3.675     | IPI:IPI00643158.1 |
| 43 | 0    | 2     | 3.4230001 | IPI:IPI00641706.1 |
| 43 | 0    | 2     | 3.153     | IPI:IPI00174849.4 |
| 43 | 0    | 2     | 3.1459998 | IPI:IPI00031370.3 |
| 43 | 0    | 2     | 3.153     | IPI:IPI00023598.2 |
| 43 | 0    | 2     | 3.1459998 | IPI:IPI00013475.1 |
| 43 | 0    | 2     | 3.1459998 | IPI:IPI00007752.1 |
| 43 | 0    | 2     | 3.4400001 | IPI:IPI00945532.1 |
| 43 | 0    | 2     | 7.7780001 | IPI:IPI00877930.1 |
| 43 | 0    | 2     | 3.7629999 | IPI:IPI00739915.3 |
| 43 | 0    | 2     | 3.4150001 | IPI:IPI00514047.1 |
| 43 | 0    | 2     | 3.153     | IPI:IPI00292496.1 |
| 44 | 2    | 2     | 8.9890003 | IPI:IPI00797221.7 |
| 44 | 0    | 2     | 8.1909999 | IPI:IPI00795257.3 |
| 44 | 0    | 2     | 7.164     | IPI:IPI00789134.4 |
| 44 | 0    | 2     | 6.6299997 | IPI:IPI00788737.1 |

|    |      |      |           |                   |
|----|------|------|-----------|-------------------|
| 44 | 0    | 2    | 7.164     | IPI:IPI00219018.7 |
| 45 | 2    | 2    | 5.0140001 | IPI:IPI00147874.1 |
| 45 | 0    | 2    | 12.59     | IPI:IPI00514997.2 |
| 45 | 0    | 2    | 12.86     | IPI:IPI00514469.1 |
| 46 | 1.97 | 1.97 | 3.819     | IPI:IPI00909232.1 |
| 46 | 0    | 1.97 | 3.5950001 | IPI:IPI00477313.3 |
| 46 | 0    | 1.97 | 3.754     | IPI:IPI00216592.2 |
| 46 | 0    | 1.97 | 4.4       | IPI:IPI00759596.1 |
| 46 | 0    | 1.97 | 7.4830003 | IPI:IPI00910718.1 |
| 46 | 0    | 1.97 | 8.1479996 | IPI:IPI00910666.1 |
| 47 | 1.65 | 1.65 | 3.1399999 | IPI:IPI00235354.1 |
| 47 | 0    | 1.65 | 2.9410001 | IPI:IPI00220156.1 |

S21

| N  | Unused | Total | %Cov(95)  | Accession         |
|----|--------|-------|-----------|-------------------|
| 1  | 24.11  | 24.11 | 40.000001 | IPI:IPI00219018.7 |
| 1  | 0      | 22.89 | 45.730001 | IPI:IPI00795257.3 |
| 2  | 21.04  | 21.04 | 32.74     | IPI:IPI00455315.4 |
| 2  | 0      | 21.04 | 31.09     | IPI:IPI00418169.3 |
| 3  | 16.83  | 16.83 | 50.190002 | IPI:IPI00797148.1 |
| 3  | 0      | 16.83 | 41.74     | IPI:IPI00760620.2 |
| 3  | 0      | 16.83 | 41.870001 | IPI:IPI00465365.4 |
| 3  | 0      | 16.83 | 36.019999 | IPI:IPI00215965.3 |
| 3  | 0      | 14.83 | 44.190001 | IPI:IPI00879518.1 |
| 3  | 0      | 14.83 | 36.880001 | IPI:IPI00644968.1 |
| 4  | 13.77  | 13.77 | 27.270001 | IPI:IPI00306543.4 |
| 5  | 11.78  | 11.78 | 21.529999 | IPI:IPI00909232.1 |
| 5  | 0      | 11.78 | 20.26     | IPI:IPI00477313.3 |
| 5  | 0      | 11.78 | 21.160001 | IPI:IPI00216592.2 |
| 5  | 0      | 9.78  | 20.4      | IPI:IPI00759596.1 |
| 6  | 11.15  | 13.17 | 23.029999 | IPI:IPI00916517.1 |
| 6  | 0      | 13.17 | 21.41     | IPI:IPI00414696.1 |
| 6  | 0      | 13.17 | 20.68     | IPI:IPI00396378.3 |
| 7  | 10.05  | 10.05 | 25.240001 | IPI:IPI00008530.1 |
| 7  | 0      | 8.53  | 25.18     | IPI:IPI00791448.1 |
| 7  | 0      | 8.05  | 15.459999 | IPI:IPI00871646.1 |
| 7  | 0      | 8.05  | 26.269999 | IPI:IPI00556485.2 |
| 8  | 8.25   | 8.25  | 17.299999 | IPI:IPI00215911.3 |
| 9  | 7.17   | 7.17  | 21.77     | IPI:IPI00549248.4 |
| 9  | 0      | 7.17  | 24.71     | IPI:IPI00658013.1 |
| 9  | 0      | 5.17  | 18.49     | IPI:IPI00220740.1 |
| 10 | 6.63   | 6.63  | 17.05     | IPI:IPI00927101.1 |
| 10 | 0      | 6.63  | 15.25     | IPI:IPI00553164.4 |
| 10 | 0      | 6.63  | 15.000001 | IPI:IPI00413108.4 |
| 10 | 0      | 6.63  | 30.610001 | IPI:IPI00790580.1 |
| 10 | 0      | 6.12  | 15.25     | IPI:IPI00411639.1 |
| 10 | 0      | 4.63  | 10.17     | IPI:IPI00847766.1 |
| 10 | 0      | 4.63  | 10.17     | IPI:IPI00793137.2 |
| 11 | 6.59   | 6.59  | 12.26     | IPI:IPI00023728.1 |

|    |      |      |           |                   |
|----|------|------|-----------|-------------------|
| 12 | 5.95 | 5.95 | 10.39     | IPI:IPI00930226.1 |
| 12 | 0    | 5.95 | 9.8669998 | IPI:IPI00894498.1 |
| 12 | 0    | 5.95 | 10.54     | IPI:IPI00894365.2 |
| 12 | 0    | 5.95 | 9.8669998 | IPI:IPI00021440.1 |
| 12 | 0    | 5.95 | 9.8669998 | IPI:IPI00021439.1 |
| 13 | 5.95 | 5.95 | 4.0369999 | IPI:IPI00220327.4 |
| 14 | 5.78 | 5.78 | 6.2309999 | IPI:IPI00744692.1 |
| 15 | 5.58 | 5.58 | 14.839999 | IPI:IPI00966854.1 |
| 15 | 0    | 5.58 | 12.84     | IPI:IPI00964992.1 |
| 15 | 0    | 5.58 | 15.000001 | IPI:IPI00964686.1 |
| 15 | 0    | 5.58 | 12.77     | IPI:IPI00742926.1 |
| 15 | 0    | 5.58 | 14.740001 | IPI:IPI00334713.1 |
| 15 | 0    | 5.58 | 12.65     | IPI:IPI00334587.1 |
| 15 | 0    | 3.58 | 8.4339999 | IPI:IPI00329355.3 |
| 15 | 0    | 3.58 | 9.7900003 | IPI:IPI00106509.3 |
| 16 | 5.44 | 5.44 | 12.25     | IPI:IPI00735319.2 |
| 16 | 0    | 5.44 | 13.959999 | IPI:IPI00917753.1 |
| 16 | 0    | 5.44 | 13.81     | IPI:IPI00896523.3 |
| 16 | 0    | 5.44 | 13.860001 | IPI:IPI00844040.1 |
| 16 | 0    | 5.44 | 13.36     | IPI:IPI00301311.1 |
| 16 | 0    | 5.44 | 12.76     | IPI:IPI00072377.1 |
| 17 | 5.21 | 5.21 | 8.8330001 | IPI:IPI00848226.1 |
| 17 | 0    | 5.21 | 10.26     | IPI:IPI00965459.1 |
| 17 | 0    | 5.21 | 14.139999 | IPI:IPI00964515.1 |
| 17 | 0    | 4.75 | 10.22     | IPI:IPI00964877.1 |
| 17 | 0    | 4    | 11.34     | IPI:IPI00964790.1 |
| 18 | 4.68 | 4.68 | 10.14     | IPI:IPI00873484.1 |
| 18 | 0    | 4.68 | 9.7900003 | IPI:IPI00005969.3 |
| 19 | 4.6  | 4.6  | 4.1390002 | IPI:IPI00966829.1 |
| 19 | 0    | 4.6  | 4.1049998 | IPI:IPI00745872.2 |
| 19 | 0    | 4.6  | 3.9870001 | IPI:IPI00022434.4 |
| 19 | 0    | 4.6  | 4.7800001 | IPI:IPI00908876.1 |
| 19 | 0    | 4.6  | 5.0609998 | IPI:IPI00878517.1 |
| 19 | 0    | 4.02 | 5.9950002 | IPI:IPI00953582.1 |
| 19 | 0    | 4.02 | 5.9950002 | IPI:IPI00384697.2 |
| 19 | 0    | 4    | 6.3129999 | IPI:IPI00216773.4 |
| 19 | 0    | 2.6  | 3.3039998 | IPI:IPI00965913.1 |
| 19 | 0    | 2.6  | 3.2680001 | IPI:IPI00965074.1 |
| 20 | 4.59 | 4.59 | 2.9270001 | IPI:IPI00382470.3 |
| 20 | 0    | 4.59 | 3.4150001 | IPI:IPI00784295.2 |
| 20 | 0    | 4    | 3.4529999 | IPI:IPI00414676.6 |
| 20 | 0    | 4    | 7.2889999 | IPI:IPI00031523.4 |
| 20 | 0    | 4    | 7.44      | IPI:IPI00966583.1 |
| 20 | 0    | 4    | 13.66     | IPI:IPI00910046.1 |
| 20 | 0    | 4    | 5.9239998 | IPI:IPI00455599.4 |
| 20 | 0    | 4    | 19.230001 | IPI:IPI00411633.4 |
| 21 | 4.33 | 4.33 | 8.7410003 | IPI:IPI00410128.2 |
| 21 | 0    | 4.33 | 7.5759999 | IPI:IPI00550451.1 |
| 21 | 0    | 4.33 | 7.3310003 | IPI:IPI00027423.3 |

|    |      |      |           |                   |
|----|------|------|-----------|-------------------|
| 21 | 0    | 4    | 5.855     | IPI:IPI00902512.2 |
| 21 | 0    | 4    | 7.6449998 | IPI:IPI00218236.6 |
| 21 | 0    | 4    | 7.418     | IPI:IPI00218187.1 |
| 21 | 0    | 4    | 7.7399999 | IPI:IPI00005705.1 |
| 22 | 4.15 | 4.15 | 2.722     | IPI:IPI00022463.1 |
| 23 | 4.03 | 4.03 | 1.8580001 | IPI:IPI00789435.2 |
| 23 | 0    | 4.03 | 1.8549999 | IPI:IPI00642971.3 |
| 23 | 0    | 4.03 | 4.6689998 | IPI:IPI00064086.5 |
| 23 | 0    | 4.03 | 4.27      | IPI:IPI00023048.4 |
| 24 | 3.71 | 3.71 | 9.0340003 | IPI:IPI00718888.1 |
| 24 | 0    | 3.71 | 9.1190003 | IPI:IPI00219617.5 |
| 24 | 0    | 3.7  | 9.2359997 | IPI:IPI00917032.1 |
| 24 | 0    | 3.7  | 9.1190003 | IPI:IPI00219616.7 |
| 24 | 0    | 3.7  | 9.1190003 | IPI:IPI00218371.4 |
| 24 | 0    | 3.7  | 13.3      | IPI:IPI00552495.1 |
| 24 | 0    | 2    | 11.33     | IPI:IPI00947401.1 |
| 24 | 0    | 2    | 9.8269999 | IPI:IPI00947377.1 |
| 25 | 3.7  | 3.7  | 9.7630002 | IPI:IPI00291006.2 |
| 25 | 0    | 2    | 7.4320003 | IPI:IPI00924593.1 |
| 25 | 0    | 1.7  | 4.7619998 | IPI:IPI00927864.2 |
| 26 | 3.64 | 3.64 | 7.1599998 | IPI:IPI00914566.2 |
| 26 | 0    | 3.64 | 8.4990002 | IPI:IPI00914971.1 |
| 26 | 0    | 3.52 | 27.520001 | IPI:IPI00902799.1 |
| 27 | 3.61 | 3.61 | 6.1500002 | IPI:IPI00910458.1 |
| 27 | 0    | 3.61 | 6.1360002 | IPI:IPI00807545.1 |
| 27 | 0    | 3.61 | 8.8239998 | IPI:IPI00640296.1 |
| 27 | 0    | 3.61 | 6.3079998 | IPI:IPI00514561.1 |
| 27 | 0    | 3.61 | 5.8189999 | IPI:IPI00216746.1 |
| 27 | 0    | 3.61 | 5.8320001 | IPI:IPI00216049.1 |
| 28 | 3.52 | 3.52 | 6.769     | IPI:IPI00220271.3 |
| 29 | 2.7  | 2.7  | 14.2      | IPI:IPI00916861.1 |
| 29 | 0    | 2.7  | 6.8180002 | IPI:IPI00916111.2 |
| 29 | 0    | 2.7  | 11.43     | IPI:IPI00915869.2 |
| 29 | 0    | 1.4  | 4.0539999 | IPI:IPI00952583.1 |
| 30 | 2.24 | 2.24 | 2.785     | IPI:IPI00940393.1 |
| 30 | 0    | 2.24 | 2.3809999 | IPI:IPI00472724.1 |
| 30 | 0    | 2.24 | 2.3809999 | IPI:IPI00396485.3 |
| 30 | 0    | 2.24 | 2.4940001 | IPI:IPI00025447.8 |
| 30 | 0    | 2    | 4.8459999 | IPI:IPI00382804.1 |
| 30 | 0    | 2    | 2.376     | IPI:IPI00014424.1 |
| 30 | 0    | 2    | 3.235     | IPI:IPI00556204.1 |
| 31 | 2.14 | 2.14 | 2.681     | IPI:IPI00893197.1 |
| 31 | 0    | 2.14 | 3.0400001 | IPI:IPI00935879.1 |
| 31 | 0    | 2.14 | 2.7930001 | IPI:IPI00293102.4 |
| 31 | 0    | 2.14 | 3.4010001 | IPI:IPI00217296.2 |
| 31 | 0    | 1.93 | 3.802     | IPI:IPI00941236.1 |
| 31 | 0    | 1.93 | 2.674     | IPI:IPI00910771.3 |
| 31 | 0    | 1.74 | 5.6820001 | IPI:IPI00853351.1 |
| 31 | 0    | 1.74 | 7.7519998 | IPI:IPI00853207.1 |

|    |      |      |           |                   |
|----|------|------|-----------|-------------------|
| 31 | 0    | 1.74 | 3.9999999 | IPI:IPI00640101.1 |
| 31 | 0    | 1.7  | 15.629999 | IPI:IPI00880122.1 |
| 32 | 2.14 | 2.14 | 3.5190001 | IPI:IPI00170972.2 |
| 32 | 0    | 2    | 5.9999999 | IPI:IPI00647890.1 |
| 33 | 2.1  | 2.1  | 5.556     | IPI:IPI00021399.1 |
| 34 | 2.09 | 2.09 | 3.5209998 | IPI:IPI00220709.3 |
| 34 | 0    | 2.09 | 4.0320002 | IPI:IPI00218820.1 |
| 34 | 0    | 2.09 | 3.3       | IPI:IPI00910712.1 |
| 34 | 0    | 2.09 | 3.5209998 | IPI:IPI00646748.1 |
| 34 | 0    | 2.09 | 3.1060001 | IPI:IPI00513698.1 |
| 34 | 0    | 2.09 | 3.5209998 | IPI:IPI00013991.1 |
| 34 | 0    | 1.85 | 3.5209998 | IPI:IPI00941861.1 |
| 34 | 0    | 1.85 | 3.5209998 | IPI:IPI00915324.1 |
| 34 | 0    | 1.85 | 3.5209998 | IPI:IPI00604537.2 |
| 34 | 0    | 1.85 | 4.6080001 | IPI:IPI00442894.3 |
| 34 | 0    | 1.85 | 3.5209998 | IPI:IPI00014581.1 |
| 34 | 0    | 1.85 | 3.5209998 | IPI:IPI00000230.6 |
| 34 | 0    | 1.85 | 3.067     | IPI:IPI00940343.1 |
| 34 | 0    | 1.85 | 3.5209998 | IPI:IPI00296039.7 |
| 34 | 0    | 1.85 | 3.5209998 | IPI:IPI00216135.1 |
| 34 | 0    | 1.85 | 3.1550001 | IPI:IPI00940084.1 |
| 34 | 0    | 1.85 | 4.0320002 | IPI:IPI00921977.1 |
| 34 | 0    | 1.85 | 4.386     | IPI:IPI00745267.2 |
| 34 | 0    | 1.85 | 4.0320002 | IPI:IPI00384369.4 |
| 34 | 0    | 1.85 | 4.0320002 | IPI:IPI00216134.3 |
| 34 | 0    | 1.85 | 4.115     | IPI:IPI00018853.1 |
| 34 | 0    | 1.85 | 6.329     | IPI:IPI00909308.1 |
| 34 | 0    | 1.76 | 3.5209998 | IPI:IPI00216975.1 |
| 34 | 0    | 1.76 | 4.0320002 | IPI:IPI00010779.4 |
| 34 | 0    | 1.53 | 3.5089999 | IPI:IPI00967467.1 |
| 34 | 0    | 1.53 | 3.5089999 | IPI:IPI00183968.4 |
| 34 | 0    | 1.53 | 4.3099999 | IPI:IPI00642042.3 |
| 34 | 0    | 1.53 | 4.0320002 | IPI:IPI00479185.1 |
| 34 | 0    | 1.53 | 4.0490001 | IPI:IPI00477649.1 |
| 34 | 0    | 1.53 | 4.0320002 | IPI:IPI00382894.2 |
| 34 | 0    | 1.53 | 4.0490001 | IPI:IPI00218320.4 |
| 34 | 0    | 1.53 | 4.0320002 | IPI:IPI00218319.3 |
| 34 | 0    | 1.52 | 6.4939998 | IPI:IPI00910322.1 |
| 34 | 0    | 1.52 | 10.53     | IPI:IPI00966664.1 |
| 35 | 2.07 | 2.07 | 0         | IPI:IPI00298406.3 |
| 35 | 0    | 2.07 | 0         | IPI:IPI00294398.1 |
| 35 | 0    | 2.07 | 0         | IPI:IPI00902588.2 |
| 36 | 2.02 | 2.02 | 6.3830003 | IPI:IPI00012382.3 |
| 36 | 0    | 2    | 8.867     | IPI:IPI00909847.1 |
| 37 | 2    | 2    | 4.4819999 | IPI:IPI00923597.2 |
| 37 | 0    | 2    | 4.061     | IPI:IPI00022078.3 |
| 38 | 2    | 2    | 5.3509999 | IPI:IPI00872780.2 |
| 38 | 0    | 2    | 4.984     | IPI:IPI00793199.1 |
| 39 | 2    | 2    | 5.7519998 | IPI:IPI00217468.3 |



|    |     |      |           |                   |
|----|-----|------|-----------|-------------------|
| 40 | 2   | 2    | 3.6959998 | IPI:IPI00954954.1 |
| 40 | 0   | 2    | 3.7950002 | IPI:IPI00795633.1 |
| 40 | 0   | 2    | 3.393     | IPI:IPI00400826.1 |
| 40 | 0   | 2    | 3.7859999 | IPI:IPI00291262.3 |
| 41 | 2   | 2    | 14.46     | IPI:IPI00952989.1 |
| 41 | 0   | 2    | 3.9220002 | IPI:IPI00845510.1 |
| 41 | 0   | 2    | 14.46     | IPI:IPI00845444.1 |
| 41 | 0   | 2    | 4.6330001 | IPI:IPI00845294.1 |
| 41 | 0   | 2    | 3.7149999 | IPI:IPI00181717.5 |
| 41 | 0   | 2    | 3.593     | IPI:IPI00002324.6 |
| 42 | 2   | 2    | 5.3479999 | IPI:IPI00102069.5 |
| 43 | 1.8 | 2.36 | 2.658     | IPI:IPI00845282.1 |
| 43 | 0   | 2.36 | 3.2790001 | IPI:IPI00045498.4 |
| 43 | 0   | 2.36 | 1.905     | IPI:IPI00011274.3 |
| 44 | 1.7 | 1.7  | 3.7590001 | IPI:IPI00944995.1 |
| 44 | 0   | 1.7  | 3.8460001 | IPI:IPI00794444.2 |
| 44 | 0   | 1.7  | 5.181     | IPI:IPI00793819.1 |
| 44 | 0   | 1.7  | 3.0029999 | IPI:IPI00556308.4 |
| 44 | 0   | 1.7  | 2.857     | IPI:IPI00180386.5 |
| 45 | 1.7 | 1.7  | 3.3849999 | IPI:IPI00847331.1 |
| 45 | 0   | 1.7  | 3.3849999 | IPI:IPI00646831.1 |
| 45 | 0   | 1.7  | 3.3849999 | IPI:IPI00022381.6 |

S22

| N  | Unused | Total | %Cov(95)  | Accession          |
|----|--------|-------|-----------|--------------------|
| 1  | 23.15  | 23.15 | 30.469999 | IPI:IPI00947127.1  |
| 1  | 0      | 23.15 | 33.129999 | IPI:IPI00217966.9  |
| 2  | 19.24  | 19.24 | 26.33     | IPI:IPI00872379.1  |
| 2  | 0      | 19.24 | 26.249999 | IPI:IPI00329801.12 |
| 3  | 17.15  | 17.15 | 23.96     | IPI:IPI00291006.2  |
| 4  | 10.67  | 10.67 | 6.8769999 | IPI:IPI00022463.1  |
| 5  | 9.67   | 9.67  | 10.71     | IPI:IPI00007102.3  |
| 5  | 0      | 9.67  | 19.71     | IPI:IPI00909336.1  |
| 5  | 0      | 9.67  | 18.12     | IPI:IPI00745272.3  |
| 5  | 0      | 9.67  | 18.69     | IPI:IPI00922891.1  |
| 5  | 0      | 9.67  | 17.25     | IPI:IPI00032575.3  |
| 6  | 9.44   | 9.44  | 7.4589998 | IPI:IPI00414676.6  |
| 6  | 0      | 8.36  | 16.069999 | IPI:IPI00966583.1  |
| 6  | 0      | 8.36  | 12.800001 | IPI:IPI00455599.4  |
| 7  | 9.21   | 9.21  | 15.91     | IPI:IPI00916111.2  |
| 7  | 0      | 7.21  | 20.479999 | IPI:IPI00915869.2  |
| 8  | 8.56   | 10.61 | 17.37     | IPI:IPI00219217.3  |
| 9  | 7.3    | 7.3   | 15.43     | IPI:IPI00303318.2  |
| 10 | 6.9    | 6.9   | 12.29     | IPI:IPI00165486.11 |
| 10 | 0      | 6.9   | 12.29     | IPI:IPI00013485.3  |
| 11 | 6.59   | 6.59  | 3.9409999 | IPI:IPI00745872.2  |
| 11 | 0      | 6.59  | 3.8279999 | IPI:IPI00022434.4  |
| 11 | 0      | 6.59  | 3.974     | IPI:IPI00966829.1  |
| 11 | 0      | 6.52  | 4.589     | IPI:IPI00908876.1  |

|    |      |      |           |                    |
|----|------|------|-----------|--------------------|
| 11 | 0    | 6.52 | 4.8579998 | IPI:IPI00878517.1  |
| 11 | 0    | 6.5  | 5.7549998 | IPI:IPI00953582.1  |
| 11 | 0    | 6.5  | 5.7549998 | IPI:IPI00384697.2  |
| 11 | 0    | 6.47 | 6.061     | IPI:IPI00216773.4  |
| 11 | 0    | 5.3  | 5.2859999 | IPI:IPI00965913.1  |
| 11 | 0    | 5.3  | 5.229     | IPI:IPI00965074.1  |
| 12 | 6.55 | 6.55 | 10.62     | IPI:IPI00217468.3  |
| 13 | 6.22 | 6.22 | 5.263     | IPI:IPI00789435.2  |
| 13 | 0    | 6.22 | 5.2549999 | IPI:IPI00642971.3  |
| 13 | 0    | 6.21 | 13.23     | IPI:IPI00064086.5  |
| 13 | 0    | 6.21 | 12.1      | IPI:IPI00023048.4  |
| 14 | 5.56 | 5.56 | 11.84     | IPI:IPI00760620.2  |
| 14 | 0    | 5.56 | 14.229999 | IPI:IPI00879518.1  |
| 14 | 0    | 5.56 | 14.229999 | IPI:IPI00797148.1  |
| 14 | 0    | 5.56 | 11.87     | IPI:IPI00644968.1  |
| 14 | 0    | 5.56 | 11.87     | IPI:IPI00465365.4  |
| 14 | 0    | 5.56 | 10.22     | IPI:IPI00215965.3  |
| 14 | 0    | 5.56 | 11.87     | IPI:IPI00879501.2  |
| 14 | 0    | 5.56 | 26.210001 | IPI:IPI00797902.1  |
| 14 | 0    | 4.92 | 13.519999 | IPI:IPI00176692.7  |
| 15 | 5.24 | 5.54 | 10.86     | IPI:IPI00217466.3  |
| 15 | 0    | 5.54 | 11.27     | IPI:IPI00217465.5  |
| 15 | 0    | 5.54 | 10.96     | IPI:IPI00217467.3  |
| 16 | 4.88 | 4.88 | 9.4020002 | IPI:IPI00021399.1  |
| 17 | 4.35 | 4.99 | 7.886     | IPI:IPI00916517.1  |
| 17 | 0    | 4.99 | 7.3310003 | IPI:IPI00414696.1  |
| 17 | 0    | 4.99 | 7.0819996 | IPI:IPI00396378.3  |
| 18 | 4.03 | 4.03 | 6.0150001 | IPI:IPI00299573.12 |
| 18 | 0    | 4    | 8.3769999 | IPI:IPI00478896.3  |
| 18 | 0    | 4    | 6.0150001 | IPI:IPI00397676.4  |
| 19 | 4.01 | 4.01 | 6.1500002 | IPI:IPI00910458.1  |
| 19 | 0    | 4.01 | 6.1360002 | IPI:IPI00807545.1  |
| 19 | 0    | 4.01 | 8.8239998 | IPI:IPI00640296.1  |
| 19 | 0    | 4.01 | 6.3079998 | IPI:IPI00514561.1  |
| 19 | 0    | 4.01 | 5.8189999 | IPI:IPI00216746.1  |
| 19 | 0    | 4.01 | 5.8320001 | IPI:IPI00216049.1  |
| 20 | 4    | 4    | 2.919     | IPI:IPI00797126.1  |
| 20 | 0    | 4    | 12.33     | IPI:IPI00797259.1  |
| 20 | 0    | 4    | 12.56     | IPI:IPI00023748.3  |
| 20 | 0    | 2    | 6.103     | IPI:IPI00012479.1  |
| 20 | 0    | 2    | 8.2840003 | IPI:IPI00909970.1  |
| 21 | 3.85 | 3.85 | 5.641     | IPI:IPI00759824.2  |
| 21 | 0    | 3.85 | 4.3820001 | IPI:IPI00007423.1  |
| 22 | 3.61 | 3.61 | 9.2249997 | IPI:IPI00939174.1  |
| 22 | 0    | 3.61 | 8.117     | IPI:IPI00000581.6  |
| 22 | 0    | 1.61 | 3.1750001 | IPI:IPI00409750.1  |
| 23 | 3.4  | 3.4  | 13.3      | IPI:IPI00966776.1  |
| 23 | 0    | 3.4  | 10.46     | IPI:IPI00966364.1  |
| 23 | 0    | 3.4  | 13.160001 | IPI:IPI00966101.1  |

|    |      |      |           |                   |
|----|------|------|-----------|-------------------|
| 23 | 0    | 3.4  | 8.3889998 | IPI:IPI00304082.8 |
| 23 | 0    | 3.4  | 12.56     | IPI:IPI00884070.1 |
| 24 | 3.31 | 3.31 | 4.403     | IPI:IPI00902588.2 |
| 24 | 0    | 3.31 | 3.59      | IPI:IPI00298406.3 |
| 24 | 0    | 3.31 | 4.459     | IPI:IPI00294398.1 |
| 25 | 3.14 | 3.14 | 5.686     | IPI:IPI00027252.6 |
| 25 | 0    | 3.12 | 6.5130003 | IPI:IPI00797822.2 |
| 26 | 3.12 | 3.12 | 3.3849999 | IPI:IPI00847331.1 |
| 26 | 0    | 3.12 | 3.3849999 | IPI:IPI00646831.1 |
| 26 | 0    | 3.12 | 3.3849999 | IPI:IPI00022381.6 |
| 27 | 3.06 | 3.06 | 6.1489999 | IPI:IPI00815784.1 |
| 27 | 0    | 3.06 | 6.1489999 | IPI:IPI00008380.1 |
| 27 | 0    | 3.06 | 6.1489999 | IPI:IPI00796774.2 |
| 27 | 0    | 3.06 | 6.1489999 | IPI:IPI00429689.3 |
| 28 | 3    | 3    | 2.744     | IPI:IPI00011416.2 |
| 29 | 2.98 | 2.98 | 6.25      | IPI:IPI00967641.1 |
| 29 | 0    | 2.98 | 4.9240001 | IPI:IPI00967073.1 |
| 29 | 0    | 2.98 | 4.9240001 | IPI:IPI00472119.2 |
| 29 | 0    | 2.98 | 4.9240001 | IPI:IPI00419880.6 |
| 29 | 0    | 2.98 | 5.83      | IPI:IPI00964983.1 |
| 29 | 0    | 2.89 | 8.9659996 | IPI:IPI00966516.1 |
| 29 | 0    | 2.47 | 8.7250002 | IPI:IPI00736161.2 |
| 30 | 2.72 | 2.72 | 5.861     | IPI:IPI00965459.1 |
| 30 | 0    | 2.72 | 5.0469998 | IPI:IPI00848226.1 |
| 30 | 0    | 2.72 | 8.0810003 | IPI:IPI00964515.1 |
| 30 | 0    | 2.59 | 5.8389999 | IPI:IPI00964877.1 |
| 30 | 0    | 2.59 | 6.4779997 | IPI:IPI00964790.1 |
| 30 | 0    | 2.13 | 5.948     | IPI:IPI00967792.1 |
| 30 | 0    | 2.13 | 15.84     | IPI:IPI00965193.1 |
| 30 | 0    | 2    | 4.984     | IPI:IPI00966111.1 |
| 30 | 0    | 2    | 19.28     | IPI:IPI00965503.1 |
| 31 | 2.58 | 2.58 | 7.914     | IPI:IPI00647667.1 |
| 31 | 0    | 2.58 | 6.1450001 | IPI:IPI00646500.1 |
| 31 | 0    | 2.58 | 8.1479996 | IPI:IPI00013939.3 |
| 31 | 0    | 2.38 | 21.15     | IPI:IPI00642145.2 |
| 32 | 2.15 | 2.15 | 3.0379999 | IPI:IPI00940393.1 |
| 32 | 0    | 2.15 | 2.5970001 | IPI:IPI00472724.1 |
| 32 | 0    | 2.15 | 2.5970001 | IPI:IPI00396485.3 |
| 32 | 0    | 2.15 | 2.7210001 | IPI:IPI00025447.8 |
| 32 | 0    | 2    | 7.4069999 | IPI:IPI00879622.1 |
| 33 | 2.12 | 2.12 | 5.263     | IPI:IPI00796848.1 |
| 33 | 0    | 2.12 | 4.9770001 | IPI:IPI00005978.8 |
| 34 | 2.01 | 2.01 | 5.085     | IPI:IPI00009253.2 |
| 35 | 2    | 2    | 2.4839999 | IPI:IPI00554648.3 |
| 35 | 0    | 2    | 5.0629999 | IPI:IPI00793917.1 |
| 35 | 0    | 2    | 2.709     | IPI:IPI00787323.2 |
| 35 | 0    | 2    | 8.1079997 | IPI:IPI00795725.1 |
| 35 | 0    | 2    | 5.714     | IPI:IPI00792642.1 |
| 35 | 0    | 2    | 2.4049999 | IPI:IPI00017870.1 |

|    |      |      |           |                   |
|----|------|------|-----------|-------------------|
| 35 | 0    | 2    | 10        | IPI:IPI00793202.1 |
| 35 | 0    | 2    | 6.0910001 | IPI:IPI00396004.3 |
| 36 | 2    | 2    | 3.3489998 | IPI:IPI00908469.1 |
| 36 | 0    | 2    | 3.675     | IPI:IPI00643158.1 |
| 36 | 0    | 2    | 3.4230001 | IPI:IPI00641706.1 |
| 36 | 0    | 2    | 3.4150001 | IPI:IPI00514047.1 |
| 36 | 0    | 2    | 3.4400001 | IPI:IPI00945532.1 |
| 36 | 0    | 2    | 7.7780001 | IPI:IPI00877930.1 |
| 36 | 0    | 2    | 3.7629999 | IPI:IPI00739915.3 |
| 36 | 0    | 2    | 3.153     | IPI:IPI00292496.1 |
| 36 | 0    | 2    | 3.153     | IPI:IPI00174849.4 |
| 36 | 0    | 2    | 3.4230001 | IPI:IPI00956657.1 |
| 36 | 0    | 2    | 5.9319999 | IPI:IPI00956241.1 |
| 36 | 0    | 2    | 3.1459998 | IPI:IPI00930715.1 |
| 36 | 0    | 2    | 3.5259999 | IPI:IPI00930130.2 |
| 36 | 0    | 2    | 3.867     | IPI:IPI00926685.1 |
| 36 | 0    | 2    | 5.9319999 | IPI:IPI00909781.1 |
| 36 | 0    | 2    | 3.0169999 | IPI:IPI00909140.7 |
| 36 | 0    | 2    | 4.4160001 | IPI:IPI00908770.1 |
| 36 | 0    | 2    | 3.7629999 | IPI:IPI00647896.1 |
| 36 | 0    | 2    | 3.286     | IPI:IPI00645452.1 |
| 36 | 0    | 2    | 3.1459998 | IPI:IPI00031370.3 |
| 36 | 0    | 2    | 3.153     | IPI:IPI00023598.2 |
| 36 | 0    | 2    | 3.1459998 | IPI:IPI00013475.1 |
| 36 | 0    | 2    | 3.1459998 | IPI:IPI00007752.1 |
| 37 | 2    | 2    | 3.8869999 | IPI:IPI00942294.1 |
| 37 | 0    | 2    | 3.6669999 | IPI:IPI00011876.3 |
| 38 | 2    | 2    | 1.863     | IPI:IPI00220327.4 |
| 39 | 2    | 2    | 4.9079999 | IPI:IPI00924791.1 |
| 39 | 0    | 2    | 5.387     | IPI:IPI00924636.1 |
| 39 | 0    | 2    | 4.8930001 | IPI:IPI00163230.5 |
| 39 | 0    | 2    | 12.899999 | IPI:IPI00909067.1 |
| 40 | 1.82 | 1.82 | 4.3049999 | IPI:IPI00735319.2 |
| 40 | 0    | 1.82 | 4.4829998 | IPI:IPI00072377.1 |
| 40 | 0    | 1.82 | 4.9059998 | IPI:IPI00917753.1 |
| 40 | 0    | 1.82 | 4.851     | IPI:IPI00896523.3 |
| 40 | 0    | 1.82 | 4.8689999 | IPI:IPI00844040.1 |
| 40 | 0    | 1.82 | 4.693     | IPI:IPI00301311.1 |
| 40 | 0    | 1.52 | 4.5609999 | IPI:IPI00941150.1 |
| 40 | 0    | 1.52 | 6.019     | IPI:IPI00942549.1 |
| 41 | 1.79 | 1.79 | 0         | IPI:IPI00007811.1 |
| 42 | 1.53 | 1.53 | 4.8670001 | IPI:IPI00909250.1 |
| 42 | 0    | 1.53 | 4.4720002 | IPI:IPI00018860.1 |

S23

| N | Unused | Total | %Cov(95)  | Accession         |
|---|--------|-------|-----------|-------------------|
| 1 | 18.25  | 18.25 | 37.650001 | IPI:IPI00000816.1 |
| 2 | 17.44  | 17.44 | 39.53     | IPI:IPI00419258.4 |
| 2 | 0      | 15.74 | 35.190001 | IPI:IPI00645948.2 |

|    |       |       |           |                   |
|----|-------|-------|-----------|-------------------|
| 2  | 0     | 15.74 | 48.100001 | IPI:IPI00644653.1 |
| 3  | 16.17 | 17.23 | 26.94     | IPI:IPI00021263.3 |
| 4  | 13.25 | 13.25 | 43.979999 | IPI:IPI00010896.3 |
| 5  | 13.06 | 13.06 | 35.249999 | IPI:IPI00021700.3 |
| 6  | 9.97  | 9.97  | 21.2      | IPI:IPI00465431.8 |
| 7  | 9.23  | 9.23  | 19.859999 | IPI:IPI00295386.7 |
| 8  | 9.21  | 9.21  | 11.93     | IPI:IPI00011253.3 |
| 9  | 8.24  | 8.24  | 7.0200004 | IPI:IPI00022463.1 |
| 10 | 8     | 8     | 24.5      | IPI:IPI00797270.4 |
| 10 | 0     | 8     | 29.049999 | IPI:IPI00796633.1 |
| 10 | 0     | 8     | 21.33     | IPI:IPI00465028.7 |
| 10 | 0     | 6     | 19.679999 | IPI:IPI00451401.3 |
| 11 | 7.75  | 7.75  | 18.38     | IPI:IPI00760620.2 |
| 11 | 0     | 7.75  | 22.1      | IPI:IPI00879518.1 |
| 11 | 0     | 7.75  | 22.1      | IPI:IPI00797148.1 |
| 11 | 0     | 7.75  | 18.440001 | IPI:IPI00644968.1 |
| 11 | 0     | 7.75  | 18.440001 | IPI:IPI00465365.4 |
| 11 | 0     | 7.75  | 15.86     | IPI:IPI00215965.3 |
| 11 | 0     | 6.06  | 17.08     | IPI:IPI00176692.7 |
| 11 | 0     | 6.04  | 33.1      | IPI:IPI00797902.1 |
| 12 | 7.58  | 7.58  | 25.979999 | IPI:IPI00549725.6 |
| 12 | 0     | 7.58  | 25.979999 | IPI:IPI00453476.2 |
| 13 | 7.02  | 7.02  | 11.69     | IPI:IPI00479185.1 |
| 13 | 0     | 7.02  | 11.69     | IPI:IPI00218319.3 |
| 13 | 0     | 7.02  | 12.5      | IPI:IPI00642042.3 |
| 13 | 0     | 5.99  | 11.74     | IPI:IPI00477649.1 |
| 13 | 0     | 5.99  | 11.69     | IPI:IPI00382894.2 |
| 13 | 0     | 5.99  | 11.74     | IPI:IPI00218320.4 |
| 13 | 0     | 5.23  | 9.3599997 | IPI:IPI00909961.1 |
| 13 | 0     | 5.23  | 10.38     | IPI:IPI00854592.3 |
| 14 | 6.7   | 6.7   | 11.67     | IPI:IPI00916517.1 |
| 14 | 0     | 6.7   | 10.85     | IPI:IPI00414696.1 |
| 14 | 0     | 6.7   | 10.48     | IPI:IPI00396378.3 |
| 15 | 5.76  | 5.76  | 22.03     | IPI:IPI00797462.1 |
| 15 | 0     | 5.76  | 18.440001 | IPI:IPI00647695.3 |
| 15 | 0     | 5.76  | 23.109999 | IPI:IPI00646524.2 |
| 15 | 0     | 5.76  | 23.010001 | IPI:IPI00645821.2 |
| 15 | 0     | 5.76  | 18.25     | IPI:IPI00000760.1 |
| 16 | 5.72  | 5.72  | 10.92     | IPI:IPI00017672.4 |
| 17 | 5.52  | 11.27 | 31.25     | IPI:IPI00967671.1 |
| 17 | 0     | 11.27 | 31.099999 | IPI:IPI00219097.4 |
| 18 | 5.41  | 5.41  | 13.240001 | IPI:IPI00791634.3 |
| 18 | 0     | 5.41  | 13.240001 | IPI:IPI00017334.1 |
| 18 | 0     | 4.01  | 8.9429997 | IPI:IPI00966398.1 |
| 18 | 0     | 4.01  | 10.78     | IPI:IPI00793658.1 |
| 18 | 0     | 4.01  | 10.73     | IPI:IPI00793442.1 |
| 19 | 5.17  | 5.17  | 9.5509999 | IPI:IPI00930226.1 |
| 19 | 0     | 5.17  | 9.0669997 | IPI:IPI00894498.1 |
| 19 | 0     | 5.17  | 9.6869998 | IPI:IPI00894365.2 |

|    |      |      |           |                    |
|----|------|------|-----------|--------------------|
| 19 | 0    | 5.17 | 9.0669997 | IPI:IPI00021440.1  |
| 19 | 0    | 5.17 | 9.0669997 | IPI:IPI00021439.1  |
| 19 | 0    | 3.17 | 4.2440001 | IPI:IPI00930343.1  |
| 19 | 0    | 3.17 | 4.8050001 | IPI:IPI00916212.1  |
| 19 | 0    | 3.17 | 4.2550001 | IPI:IPI00025416.3  |
| 19 | 0    | 3.17 | 4.2440001 | IPI:IPI00023006.1  |
| 19 | 0    | 3.17 | 4.2440001 | IPI:IPI00021428.1  |
| 19 | 0    | 3.17 | 4.2440001 | IPI:IPI00008603.1  |
| 19 | 0    | 3.17 | 4.665     | IPI:IPI00922693.1  |
| 19 | 0    | 3.17 | 4.6780001 | IPI:IPI00878173.1  |
| 20 | 5.01 | 6.08 | 15.279999 | IPI:IPI00411765.3  |
| 20 | 0    | 6.08 | 13.31     | IPI:IPI00013890.2  |
| 21 | 4.63 | 4.63 | 8.5500002 | IPI:IPI00472442.4  |
| 21 | 0    | 4.63 | 8.7449998 | IPI:IPI00016832.1  |
| 21 | 0    | 4.05 | 8.7449998 | IPI:IPI00871889.1  |
| 22 | 4.06 | 4.06 | 14.470001 | IPI:IPI00395627.3  |
| 22 | 0    | 2.06 | 10        | IPI:IPI00940004.1  |
| 22 | 0    | 2.06 | 9.95      | IPI:IPI00552308.2  |
| 23 | 4    | 4    | 12.31     | IPI:IPI00759824.2  |
| 23 | 0    | 4    | 9.5619999 | IPI:IPI00007423.1  |
| 23 | 0    | 2    | 8.3329998 | IPI:IPI00647001.1  |
| 24 | 3.61 | 3.61 | 9.1909997 | IPI:IPI00871827.1  |
| 24 | 0    | 3.61 | 12.02     | IPI:IPI00794746.1  |
| 24 | 0    | 3.61 | 9.6529998 | IPI:IPI00472171.3  |
| 24 | 0    | 3.61 | 10.08     | IPI:IPI00030179.3  |
| 25 | 3.52 | 3.52 | 10.23     | IPI:IPI00472119.2  |
| 25 | 0    | 3.52 | 10.23     | IPI:IPI00419880.6  |
| 25 | 0    | 3.52 | 12.980001 | IPI:IPI00967641.1  |
| 25 | 0    | 3.52 | 10.23     | IPI:IPI00967073.1  |
| 25 | 0    | 3.52 | 12.11     | IPI:IPI00964983.1  |
| 25 | 0    | 3.52 | 18.619999 | IPI:IPI00966516.1  |
| 25 | 0    | 2    | 8.7250002 | IPI:IPI00736161.2  |
| 25 | 0    | 1.52 | 7.2159998 | IPI:IPI00968146.1  |
| 26 | 3.42 | 3.42 | 3.802     | IPI:IPI00217030.10 |
| 26 | 0    | 2.1  | 3.802     | IPI:IPI00219894.5  |
| 26 | 0    | 2.1  | 3.8169999 | IPI:IPI00643830.2  |
| 26 | 0    | 2.1  | 3.802     | IPI:IPI00302740.8  |
| 27 | 3.12 | 3.12 | 1.863     | IPI:IPI00220327.4  |
| 28 | 3.1  | 3.1  | 4.8670001 | IPI:IPI00217468.3  |
| 29 | 2.94 | 2.94 | 4.7619998 | IPI:IPI00014938.3  |
| 29 | 0.03 | 2.05 | 6.1730001 | IPI:IPI00798360.1  |
| 29 | 0    | 2.9  | 2.1740001 | IPI:IPI00795769.1  |
| 29 | 0    | 1.98 | 24.39     | IPI:IPI00797742.1  |
| 29 | 0    | 1.51 | 0         | IPI:IPI00844412.1  |
| 30 | 2.8  | 2.8  | 11.19     | IPI:IPI00930174.1  |
| 30 | 0    | 2.8  | 9.0360001 | IPI:IPI00794461.1  |
| 30 | 0    | 2.8  | 9.0360001 | IPI:IPI00646240.3  |
| 30 | 0    | 2.8  | 11.9      | IPI:IPI00329665.8  |
| 30 | 0    | 2.8  | 11.9      | IPI:IPI00303133.8  |

|    |      |      |           |                   |
|----|------|------|-----------|-------------------|
| 30 | 0    | 2.8  | 11.9      | IPI:IPI00220403.3 |
| 30 | 0    | 2.8  | 11.9      | IPI:IPI00152785.3 |
| 30 | 0    | 2.8  | 11.9      | IPI:IPI00930570.1 |
| 30 | 0    | 2.8  | 11.9      | IPI:IPI00815755.1 |
| 30 | 0    | 2.8  | 11.9      | IPI:IPI00554798.2 |
| 30 | 0    | 2.8  | 11.9      | IPI:IPI00515061.3 |
| 30 | 0    | 2.8  | 11.9      | IPI:IPI00477495.3 |
| 30 | 0    | 2.8  | 11.9      | IPI:IPI00419833.9 |
| 30 | 0    | 2.8  | 11.9      | IPI:IPI00152906.6 |
| 30 | 0    | 2.8  | 11.9      | IPI:IPI00020101.9 |
| 30 | 0    | 2.8  | 11.9      | IPI:IPI00003935.6 |
| 30 | 0    | 2.8  | 11.9      | IPI:IPI00018534.4 |
| 30 | 0    | 2.59 | 11.9      | IPI:IPI00166293.5 |
| 31 | 2.46 | 2.46 | 3.4249999 | IPI:IPI00218591.2 |
| 31 | 0    | 2.46 | 4.975     | IPI:IPI00218592.5 |
| 31 | 0    | 2.46 | 4.0320002 | IPI:IPI00215884.4 |
| 32 | 2.27 | 2.27 | 11.04     | IPI:IPI00797067.1 |
| 32 | 0    | 2.27 | 9.7139999 | IPI:IPI00792607.1 |
| 32 | 0    | 2.27 | 6.6670001 | IPI:IPI00297477.3 |
| 33 | 2.26 | 2.26 | 0         | IPI:IPI00790207.1 |
| 33 | 0    | 2.26 | 0         | IPI:IPI00299155.5 |
| 33 | 0    | 1.79 | 0         | IPI:IPI00795606.1 |
| 33 | 0    | 1.79 | 0         | IPI:IPI00789638.1 |
| 33 | 0    | 1.47 | 0         | IPI:IPI00791083.1 |
| 34 | 2.21 | 2.21 | 6.1799999 | IPI:IPI00218372.1 |
| 34 | 0    | 2.21 | 4.4349998 | IPI:IPI00024175.3 |
| 34 | 0    | 2    | 4.4       | IPI:IPI00748423.1 |
| 34 | 0    | 2    | 5.1890001 | IPI:IPI00219950.2 |
| 34 | 0    | 2    | 4.2970002 | IPI:IPI00154509.3 |
| 35 | 2.21 | 2.21 | 5.6820001 | IPI:IPI00927101.1 |
| 35 | 0    | 2.21 | 10.07     | IPI:IPI00798361.1 |
| 35 | 0    | 2.21 | 10.2      | IPI:IPI00790580.1 |
| 35 | 0    | 2.21 | 5.085     | IPI:IPI00553164.4 |
| 35 | 0    | 2.21 | 5.0000001 | IPI:IPI00413108.4 |
| 35 | 0    | 2    | 5.085     | IPI:IPI00411639.1 |
| 36 | 2.1  | 2.1  | 4.651     | IPI:IPI00029997.1 |
| 37 | 2.09 | 2.09 | 2.392     | IPI:IPI00022434.4 |
| 37 | 0    | 2.09 | 2.483     | IPI:IPI00966829.1 |
| 37 | 0    | 2.09 | 2.4630001 | IPI:IPI00745872.2 |
| 37 | 0    | 2.09 | 3.3039998 | IPI:IPI00965913.1 |
| 37 | 0    | 2.09 | 3.2680001 | IPI:IPI00965074.1 |
| 37 | 0    | 2.09 | 2.868     | IPI:IPI00908876.1 |
| 37 | 0    | 2.09 | 3.036     | IPI:IPI00878517.1 |
| 37 | 0    | 2.05 | 3.5969999 | IPI:IPI00953582.1 |
| 37 | 0    | 2.05 | 3.5969999 | IPI:IPI00384697.2 |
| 37 | 0    | 2.05 | 3.788     | IPI:IPI00216773.4 |
| 38 | 2.02 | 2.02 | 9.42      | IPI:IPI00938339.1 |
| 38 | 0    | 2    | 3.4389999 | IPI:IPI00939558.1 |
| 38 | 0    | 2    | 3.4389999 | IPI:IPI00816796.1 |

|    |      |      |           |                   |
|----|------|------|-----------|-------------------|
| 38 | 0    | 2    | 3.325     | IPI:IPI00304692.1 |
| 39 | 2.01 | 2.01 | 1.405     | IPI:IPI00797126.1 |
| 39 | 0    | 2    | 6.047     | IPI:IPI00023748.3 |
| 39 | 0    | 2    | 5.9360001 | IPI:IPI00797259.1 |
| 39 | 0    | 2    | 6.103     | IPI:IPI00012479.1 |
| 40 | 2    | 5.28 | 9.7560003 | IPI:IPI00216318.5 |
| 40 | 0    | 5.27 | 9.8360002 | IPI:IPI00759832.1 |
| 40 | 0    | 2.22 | 18.92     | IPI:IPI00645801.1 |
| 40 | 0    | 2.22 | 14        | IPI:IPI00640721.1 |
| 41 | 2    | 3.08 | 5.714     | IPI:IPI00792642.1 |
| 41 | 0    | 3.08 | 2.4839999 | IPI:IPI00554648.3 |
| 41 | 0    | 3.05 | 10        | IPI:IPI00793202.1 |
| 41 | 0    | 2.04 | 2.4049999 | IPI:IPI00017870.1 |
| 41 | 0    | 2    | 8.1079997 | IPI:IPI00795725.1 |
| 41 | 0    | 2    | 5.0629999 | IPI:IPI00793917.1 |
| 41 | 0    | 2    | 2.709     | IPI:IPI00787323.2 |
| 41 | 0    | 2    | 6.0910001 | IPI:IPI00396004.3 |
| 42 | 2    | 2.01 | 4.9770001 | IPI:IPI00217466.3 |
| 42 | 0    | 2.01 | 5.023     | IPI:IPI00217467.3 |
| 42 | 0    | 2.01 | 5.164     | IPI:IPI00217465.5 |
| 42 | 0    | 2    | 4.9770001 | IPI:IPI00419983.3 |
| 42 | 0    | 2    | 5.116     | IPI:IPI00217469.3 |
| 43 | 2    | 2    | 8.2929999 | IPI:IPI00790966.2 |
| 43 | 0    | 2    | 5.556     | IPI:IPI00020075.4 |
| 44 | 2    | 2    | 12.5      | IPI:IPI00639839.1 |
| 44 | 0    | 2    | 8.8239998 | IPI:IPI00552089.1 |
| 44 | 0    | 2    | 5.7969999 | IPI:IPI00032292.1 |
| 44 | 0    | 2    | 8.3920002 | IPI:IPI00642739.1 |
| 45 | 2    | 2    | 4.7150001 | IPI:IPI00642549.2 |
| 45 | 0    | 2    | 4.645     | IPI:IPI00008223.3 |
| 46 | 2    | 2    | 8.1820004 | IPI:IPI00555744.6 |
| 47 | 2    | 2    | 6.6670001 | IPI:IPI00178440.3 |
| 47 | 0    | 2    | 22.059999 | IPI:IPI00927920.1 |
| 47 | 0    | 2    | 12.2      | IPI:IPI00927696.1 |
| 47 | 0    | 2    | 51.719999 | IPI:IPI00926585.1 |
| 48 | 2    | 2    | 3.9299998 | IPI:IPI00026546.1 |
| 49 | 2    | 2    | 7.767     | IPI:IPI00453473.6 |
| 50 | 1.93 | 1.93 | 2.733     | IPI:IPI00910458.1 |
| 50 | 0    | 1.93 | 2.727     | IPI:IPI00807545.1 |
| 50 | 0    | 1.93 | 3.9220002 | IPI:IPI00640296.1 |
| 50 | 0    | 1.93 | 2.8039999 | IPI:IPI00514561.1 |
| 50 | 0    | 1.93 | 2.586     | IPI:IPI00216746.1 |
| 50 | 0    | 1.93 | 2.592     | IPI:IPI00216049.1 |
| 51 | 1.71 | 1.71 | 0         | IPI:IPI00748256.2 |
| 51 | 0    | 1.71 | 0         | IPI:IPI00479722.2 |
| 52 | 1.7  | 1.7  | 4.9109999 | IPI:IPI00024157.1 |
| 53 | 1.7  | 1.7  | 3.6520001 | IPI:IPI00016610.2 |
| 54 | 1.68 | 1.68 | 0         | IPI:IPI00642936.1 |
| 54 | 0    | 1.68 | 0         | IPI:IPI00019755.3 |



|    |      |      |           |                   |
|----|------|------|-----------|-------------------|
| 55 | 1.52 | 1.52 | 5.2859999 | IPI:IPI00867679.1 |
| 55 | 0    | 1.52 | 4.8780002 | IPI:IPI00029623.1 |
| 56 | 1.4  | 1.4  | 6.8810001 | IPI:IPI00643522.1 |
| 56 | 0    | 1.4  | 16.48     | IPI:IPI00640929.1 |
| 56 | 0    | 1.4  | 6.024     | IPI:IPI00021840.1 |
| 57 | 1.4  | 1.4  | 4.5609999 | IPI:IPI00398758.1 |
| 57 | 0    | 1.4  | 4.3049999 | IPI:IPI00300567.1 |

S24

| N  | Unused | Total | %Cov(95)  | Accession         |
|----|--------|-------|-----------|-------------------|
| 1  | 31.15  | 31.15 | 21.74     | IPI:IPI00220327.4 |
| 2  | 25.83  | 25.83 | 75.5      | IPI:IPI00797270.4 |
| 2  | 0      | 25.83 | 65.73     | IPI:IPI00465028.7 |
| 3  | 20.17  | 20.17 | 41.960001 | IPI:IPI00000816.1 |
| 4  | 17.43  | 17.43 | 16.779999 | IPI:IPI00009865.4 |
| 5  | 10.85  | 10.85 | 13.64     | IPI:IPI00019359.4 |
| 6  | 10.57  | 10.57 | 33.48     | IPI:IPI00220301.5 |
| 7  | 9.93   | 9.93  | 9.2399999 | IPI:IPI00655812.1 |
| 7  | 0      | 9.93  | 7.3289998 | IPI:IPI00644087.1 |
| 7  | 0      | 9.93  | 7.8670003 | IPI:IPI00216952.1 |
| 7  | 0      | 9.93  | 6.7769997 | IPI:IPI00021405.3 |
| 7  | 0      | 9.93  | 9.6770003 | IPI:IPI00514204.3 |
| 7  | 0      | 9.93  | 7.0979998 | IPI:IPI00216953.1 |
| 8  | 8.89   | 10.43 | 20.41     | IPI:IPI00021263.3 |
| 9  | 8.46   | 10.86 | 10.56     | IPI:IPI00554648.3 |
| 9  | 0      | 8.46  | 17.299999 | IPI:IPI00793917.1 |
| 9  | 0      | 8.46  | 9.2550002 | IPI:IPI00787323.2 |
| 9  | 0      | 6.46  | 20.95     | IPI:IPI00795725.1 |
| 10 | 8.44   | 8.89  | 10        | IPI:IPI00554788.5 |
| 11 | 7.87   | 12.27 | 8.2170002 | IPI:IPI00021304.1 |
| 12 | 7.59   | 8.11  | 10.5      | IPI:IPI00479145.2 |
| 13 | 7.14   | 7.14  | 15.000001 | IPI:IPI00165972.3 |
| 14 | 6.62   | 6.62  | 17.41     | IPI:IPI00922165.1 |
| 14 | 0      | 6.62  | 16.81     | IPI:IPI00218988.4 |
| 14 | 0      | 6.62  | 16.320001 | IPI:IPI00215901.1 |
| 14 | 0      | 5.52  | 20.31     | IPI:IPI00921960.1 |
| 14 | 0      | 4.62  | 11.39     | IPI:IPI00172460.4 |
| 15 | 6.32   | 6.32  | 9.7280003 | IPI:IPI00647280.2 |
| 15 | 0      | 6.32  | 9.2249997 | IPI:IPI00011937.1 |
| 15 | 0      | 6.32  | 15.530001 | IPI:IPI00639945.1 |
| 16 | 6      | 6     | 15.700001 | IPI:IPI00917623.1 |
| 16 | 0      | 6     | 18.92     | IPI:IPI00916061.1 |
| 16 | 0      | 6     | 15.350001 | IPI:IPI00018768.1 |
| 17 | 5.96   | 5.96  | 10.2      | IPI:IPI00419249.5 |
| 17 | 0      | 5.96  | 10.48     | IPI:IPI00171199.5 |
| 18 | 5.92   | 5.92  | 12.88     | IPI:IPI00940851.1 |
| 18 | 0      | 5.92  | 11.9      | IPI:IPI00301936.4 |
| 19 | 5.75   | 5.75  | 13.169999 | IPI:IPI00025512.2 |
| 20 | 5.66   | 5.66  | 10.59     | IPI:IPI00792352.1 |

|    |      |      |           |                   |
|----|------|------|-----------|-------------------|
| 20 | 0    | 5.66 | 10.73     | IPI:IPI00795671.1 |
| 20 | 0    | 5.66 | 11.57     | IPI:IPI00643041.3 |
| 20 | 0    | 5.1  | 10.68     | IPI:IPI00796462.1 |
| 21 | 5.47 | 5.47 | 8.4009998 | IPI:IPI00744148.2 |
| 21 | 0    | 5.47 | 8.3329998 | IPI:IPI00304171.6 |
| 21 | 0    | 5.47 | 8.3559997 | IPI:IPI00059366.4 |
| 21 | 0    | 5.44 | 15.5      | IPI:IPI00910098.1 |
| 21 | 0    | 5.44 | 16.150001 | IPI:IPI00148096.2 |
| 22 | 5.32 | 5.32 | 10.93     | IPI:IPI00004845.4 |
| 23 | 5.16 | 5.16 | 18.889999 | IPI:IPI00412579.6 |
| 23 | 0    | 3.67 | 20.299999 | IPI:IPI00478277.3 |
| 24 | 5.01 | 5.01 | 9.3630001 | IPI:IPI00879518.1 |
| 24 | 0    | 5.01 | 7.8129999 | IPI:IPI00879501.2 |
| 24 | 0    | 5.01 | 9.3630001 | IPI:IPI00797148.1 |
| 24 | 0    | 5.01 | 7.7880003 | IPI:IPI00760620.2 |
| 24 | 0    | 5.01 | 7.8129999 | IPI:IPI00644968.1 |
| 24 | 0    | 5.01 | 7.8129999 | IPI:IPI00465365.4 |
| 24 | 0    | 5.01 | 6.7199998 | IPI:IPI00215965.3 |
| 24 | 0    | 5.01 | 17.24     | IPI:IPI00797902.1 |
| 24 | 0    | 4.6  | 8.8969998 | IPI:IPI00176692.7 |
| 25 | 4.61 | 4.61 | 11.93     | IPI:IPI00218493.7 |
| 26 | 4.57 | 4.57 | 10.18     | IPI:IPI00217468.3 |
| 27 | 4    | 4    | 6.1500002 | IPI:IPI00910458.1 |
| 27 | 0    | 4    | 6.1360002 | IPI:IPI00807545.1 |
| 27 | 0    | 4    | 6.3079998 | IPI:IPI00514561.1 |
| 27 | 0    | 4    | 5.8189999 | IPI:IPI00216746.1 |
| 27 | 0    | 4    | 5.8320001 | IPI:IPI00216049.1 |
| 27 | 0    | 4    | 8.8239998 | IPI:IPI00640296.1 |
| 28 | 4    | 4    | 12.23     | IPI:IPI00026546.1 |
| 28 | 0    | 2    | 9.4059996 | IPI:IPI00873066.1 |
| 29 | 3.96 | 3.96 | 2.8650001 | IPI:IPI00022463.1 |
| 29 | 0    | 2.15 | 8.5709997 | IPI:IPI00798216.1 |
| 30 | 3.52 | 3.52 | 2.919     | IPI:IPI00797126.1 |
| 30 | 0    | 3.52 | 12.33     | IPI:IPI00797259.1 |
| 30 | 0    | 3.52 | 12.56     | IPI:IPI00023748.3 |
| 30 | 0    | 2    | 8.2840003 | IPI:IPI00909970.1 |
| 30 | 0    | 1.53 | 6.103     | IPI:IPI00012479.1 |
| 31 | 3.32 | 3.32 | 4.149     | IPI:IPI00291922.2 |
| 32 | 3.17 | 3.17 | 11.19     | IPI:IPI00930174.1 |
| 32 | 0    | 3.17 | 11.9      | IPI:IPI00815755.1 |
| 32 | 0    | 3.17 | 11.9      | IPI:IPI00515061.3 |
| 32 | 0    | 3.17 | 11.9      | IPI:IPI00477495.3 |
| 32 | 0    | 3.17 | 11.9      | IPI:IPI00419833.9 |
| 32 | 0    | 3.17 | 11.9      | IPI:IPI00020101.9 |
| 32 | 0    | 3.17 | 11.9      | IPI:IPI00003935.6 |
| 32 | 0    | 3.17 | 11.9      | IPI:IPI00930570.1 |
| 32 | 0    | 3.17 | 9.0360001 | IPI:IPI00794461.1 |
| 32 | 0    | 3.17 | 9.0360001 | IPI:IPI00646240.3 |
| 32 | 0    | 3.17 | 11.9      | IPI:IPI00554798.2 |

|    |      |      |           |                   |
|----|------|------|-----------|-------------------|
| 32 | 0    | 3.17 | 11.9      | IPI:IPI00329665.8 |
| 32 | 0    | 3.17 | 11.9      | IPI:IPI00303133.8 |
| 32 | 0    | 3.17 | 11.9      | IPI:IPI00220403.3 |
| 32 | 0    | 3.17 | 11.9      | IPI:IPI00152906.6 |
| 32 | 0    | 3.17 | 11.9      | IPI:IPI00152785.3 |
| 32 | 0    | 3.17 | 11.9      | IPI:IPI00018534.4 |
| 32 | 0    | 3.13 | 11.9      | IPI:IPI00166293.5 |
| 33 | 2.93 | 2.93 | 5.6120001 | IPI:IPI00911096.1 |
| 33 | 0    | 2.93 | 3.819     | IPI:IPI00909232.1 |
| 33 | 0    | 2.93 | 4.8670001 | IPI:IPI00759822.1 |
| 33 | 0    | 2.93 | 3.5950001 | IPI:IPI00477313.3 |
| 33 | 0    | 2.93 | 3.754     | IPI:IPI00216592.2 |
| 34 | 2.84 | 2.84 | 8.811     | IPI:IPI00645307.2 |
| 34 | 0    | 2.84 | 7.0419997 | IPI:IPI00220014.2 |
| 35 | 2.83 | 2.83 | 8.9740001 | IPI:IPI00219622.3 |
| 35 | 0    | 2    | 43.75     | IPI:IPI00925799.1 |
| 35 | 0    | 2    | 58.329999 | IPI:IPI00924522.1 |
| 36 | 2.8  | 2.8  | 7.9790004 | IPI:IPI00645201.1 |
| 36 | 0    | 2.8  | 7.2120003 | IPI:IPI00216587.9 |
| 37 | 2.46 | 2.46 | 6.6079997 | IPI:IPI00646917.1 |
| 37 | 0    | 2    | 14.29     | IPI:IPI00552186.3 |
| 38 | 2.44 | 2.44 | 1.667     | IPI:IPI00879819.1 |
| 38 | 0    | 2.44 | 1.613     | IPI:IPI00009771.6 |
| 39 | 2.4  | 2.4  | 3.8959999 | IPI:IPI00014808.1 |
| 40 | 2.21 | 2.21 | 7.0919998 | IPI:IPI00014230.1 |
| 40 | 0    | 2    | 11.24     | IPI:IPI00796075.1 |
| 41 | 2.11 | 2.11 | 11.04     | IPI:IPI00797067.1 |
| 41 | 0    | 2.11 | 9.7139999 | IPI:IPI00792607.1 |
| 41 | 0    | 2.11 | 6.6670001 | IPI:IPI00297477.3 |
| 42 | 2.04 | 2.04 | 2.4630001 | IPI:IPI00745872.2 |
| 42 | 0    | 2.04 | 2.392     | IPI:IPI00022434.4 |
| 42 | 0    | 2.04 | 2.483     | IPI:IPI00966829.1 |
| 42 | 0    | 2.04 | 2.868     | IPI:IPI00908876.1 |
| 42 | 0    | 2.04 | 3.036     | IPI:IPI00878517.1 |
| 42 | 0    | 2.04 | 3.3039998 | IPI:IPI00965913.1 |
| 42 | 0    | 2.04 | 3.2680001 | IPI:IPI00965074.1 |
| 42 | 0    | 2    | 3.788     | IPI:IPI00216773.4 |
| 42 | 0    | 2    | 3.5969999 | IPI:IPI00953582.1 |
| 42 | 0    | 2    | 3.5969999 | IPI:IPI00384697.2 |
| 43 | 2.03 | 2.03 | 9.7089998 | IPI:IPI00453473.6 |
| 44 | 2    | 2    | 6.9150001 | IPI:IPI00643317.3 |
| 44 | 0    | 2    | 6.7359999 | IPI:IPI00640781.1 |
| 44 | 0    | 2    | 6.4999998 | IPI:IPI00217477.5 |
| 44 | 0    | 2    | 8.4969997 | IPI:IPI00411540.3 |
| 44 | 0    | 2    | 7.1039997 | IPI:IPI00936241.1 |
| 44 | 0    | 2    | 6.25      | IPI:IPI00888596.1 |
| 44 | 0    | 2    | 6.25      | IPI:IPI00376756.4 |
| 44 | 0    | 2    | 10        | IPI:IPI00006437.2 |
| 44 | 0    | 2    | 6.701     | IPI:IPI00941696.1 |

|    |      |      |           |                   |
|----|------|------|-----------|-------------------|
| 44 | 0    | 2    | 6.3730001 | IPI:IPI00787656.1 |
| 44 | 0    | 2    | 6.4680003 | IPI:IPI00374293.4 |
| 45 | 2    | 2    | 8.1079997 | IPI:IPI00658013.1 |
| 45 | 0    | 2    | 7.1429998 | IPI:IPI00549248.4 |
| 45 | 0    | 2    | 7.925     | IPI:IPI00220740.1 |
| 46 | 2    | 2    | 2.7729999 | IPI:IPI00556590.2 |
| 46 | 0    | 2    | 7.282     | IPI:IPI00217519.3 |
| 46 | 0    | 2    | 9.1459997 | IPI:IPI00927712.1 |
| 47 | 2    | 2    | 4.1820001 | IPI:IPI00334175.3 |
| 47 | 0    | 2    | 4.129     | IPI:IPI00183626.8 |
| 47 | 0    | 2    | 4.3310001 | IPI:IPI00179964.5 |
| 48 | 2    | 2    | 7.2460003 | IPI:IPI00956307.1 |
| 48 | 0    | 2    | 6.0729999 | IPI:IPI00941154.2 |
| 48 | 0    | 2    | 9.9339999 | IPI:IPI00796527.2 |
| 48 | 0    | 2    | 8.0650002 | IPI:IPI00896474.2 |
| 48 | 0    | 2    | 6.0479999 | IPI:IPI00873344.1 |
| 48 | 0    | 2    | 6.696     | IPI:IPI00619958.3 |
| 49 | 2    | 2    | 4.5449998 | IPI:IPI00797917.1 |
| 49 | 0    | 2    | 4.5449998 | IPI:IPI00797249.1 |
| 49 | 0    | 2    | 4.5079999 | IPI:IPI00448095.3 |
| 50 | 2    | 2    | 6.3830003 | IPI:IPI00796541.1 |
| 50 | 0    | 2    | 6.024     | IPI:IPI00794402.1 |
| 50 | 0    | 2    | 18.99     | IPI:IPI00791180.1 |
| 50 | 0    | 2    | 7.3530003 | IPI:IPI00003815.3 |
| 50 | 0    | 2    | 7.6530002 | IPI:IPI00793767.1 |
| 51 | 2    | 2    | 6.1799999 | IPI:IPI00218372.1 |
| 51 | 0    | 2    | 4.4349998 | IPI:IPI00024175.3 |
| 51 | 0    | 2    | 4.4       | IPI:IPI00748423.1 |
| 51 | 0    | 2    | 5.1890001 | IPI:IPI00219950.2 |
| 51 | 0    | 2    | 4.2970002 | IPI:IPI00154509.3 |
| 52 | 2    | 2    | 11.83     | IPI:IPI00639797.1 |
| 52 | 0    | 2    | 7.9369999 | IPI:IPI00336094.5 |
| 52 | 0    | 2    | 7.6629996 | IPI:IPI00017726.1 |
| 53 | 2    | 2    | 4.9240001 | IPI:IPI00025796.3 |
| 54 | 1.86 | 3.43 | 5.8820002 | IPI:IPI00217466.3 |
| 54 | 0    | 3.43 | 5.9360001 | IPI:IPI00217467.3 |
| 54 | 0    | 3.43 | 6.103     | IPI:IPI00217465.5 |
| 55 | 1.82 | 1.82 | 5.0000001 | IPI:IPI00642936.1 |
| 55 | 0    | 1.82 | 4.149     | IPI:IPI00019755.3 |
| 56 | 1.77 | 1.77 | 4.8780002 | IPI:IPI00029623.1 |
| 56 | 0    | 1.4  | 5.2859999 | IPI:IPI00867679.1 |
| 57 | 1.7  | 2.11 | 4.7320001 | IPI:IPI00916517.1 |
| 57 | 0    | 2.11 | 4.3990001 | IPI:IPI00414696.1 |
| 57 | 0    | 2.11 | 4.2490002 | IPI:IPI00396378.3 |
| 58 | 1.7  | 1.7  | 3.6520001 | IPI:IPI00016610.2 |
| 59 | 1.7  | 1.7  | 1.108     | IPI:IPI00967299.1 |
| 59 | 0    | 1.7  | 1.085     | IPI:IPI00449049.5 |
| 60 | 1.55 | 1.55 | 5.2000001 | IPI:IPI00465431.8 |
| 61 | 1.53 | 1.97 | 2.0479999 | IPI:IPI00217975.4 |

|    |      |      |           |                   |
|----|------|------|-----------|-------------------|
| 61 | 0    | 1.97 | 3.101     | IPI:IPI00790831.1 |
| 62 | 1.45 | 5.1  | 8.1629999 | IPI:IPI00018146.1 |

S25

| N  | Unused | Total | %Cov(95)  | Accession         |
|----|--------|-------|-----------|-------------------|
| 1  | 17.35  | 17.35 | 43.180001 | IPI:IPI00647915.1 |
| 1  | 0      | 17.35 | 47.74     | IPI:IPI00550363.3 |
| 1  | 0      | 15.35 | 43.32     | IPI:IPI00644531.1 |
| 2  | 17.01  | 17.01 | 35.679999 | IPI:IPI00000874.1 |
| 2  | 0      | 16.91 | 41.52     | IPI:IPI00640741.1 |
| 3  | 14.87  | 14.87 | 38.429999 | IPI:IPI00646304.4 |
| 4  | 13.77  | 13.77 | 45.449999 | IPI:IPI00219446.5 |
| 4  | 0      | 13.2  | 43.37     | IPI:IPI00795288.1 |
| 5  | 11.02  | 13.13 | 24.240001 | IPI:IPI00027350.3 |
| 5  | 0      | 13.02 | 26.230001 | IPI:IPI00909207.1 |
| 5  | 0      | 9.72  | 27.21     | IPI:IPI00794777.1 |
| 6  | 10.68  | 10.68 | 49.110001 | IPI:IPI00909841.1 |
| 6  | 0      | 10.68 | 33.129999 | IPI:IPI00012011.6 |
| 7  | 8.13   | 8.13  | 34.39     | IPI:IPI00298547.3 |
| 8  | 7.83   | 7.83  | 10.82     | IPI:IPI00221088.5 |
| 9  | 7.49   | 7.49  | 40.779999 | IPI:IPI00453473.6 |
| 10 | 7.13   | 7.13  | 8.749999  | IPI:IPI00479145.2 |
| 10 | 0      | 5.13  | 3.9080001 | IPI:IPI00789324.3 |
| 11 | 6.35   | 6.35  | 16.52     | IPI:IPI00220301.5 |
| 12 | 6      | 6     | 4.7279999 | IPI:IPI00022463.1 |
| 13 | 5.4    | 5.4   | 16.84     | IPI:IPI00789119.1 |
| 13 | 0      | 5.4   | 13.39     | IPI:IPI00000811.2 |
| 13 | 0      | 3.7   | 18.42     | IPI:IPI00796198.1 |
| 14 | 5.25   | 5.25  | 14.11     | IPI:IPI00025019.3 |
| 15 | 5.19   | 5.19  | 10.5      | IPI:IPI00374151.1 |
| 15 | 0      | 5.19  | 9.7659998 | IPI:IPI00024919.3 |
| 16 | 4.41   | 4.41  | 15.15     | IPI:IPI00024933.3 |
| 16 | 0      | 4     | 21.37     | IPI:IPI00868816.1 |
| 17 | 4.21   | 4.21  | 9.8860003 | IPI:IPI00479306.1 |
| 17 | 0      | 4.21  | 16.249999 | IPI:IPI00910237.1 |
| 18 | 4.15   | 4.15  | 20.630001 | IPI:IPI00930570.1 |
| 18 | 0      | 4.15  | 19.400001 | IPI:IPI00930174.1 |
| 18 | 0      | 4.15  | 20.630001 | IPI:IPI00815755.1 |
| 18 | 0      | 4.15  | 15.66     | IPI:IPI00794461.1 |
| 18 | 0      | 4.15  | 15.66     | IPI:IPI00646240.3 |
| 18 | 0      | 4.15  | 20.630001 | IPI:IPI00554798.2 |
| 18 | 0      | 4.15  | 20.630001 | IPI:IPI00477495.3 |
| 18 | 0      | 4.15  | 20.630001 | IPI:IPI00419833.9 |
| 18 | 0      | 4.15  | 20.630001 | IPI:IPI00329665.8 |
| 18 | 0      | 4.15  | 20.630001 | IPI:IPI00303133.8 |
| 18 | 0      | 4.15  | 20.630001 | IPI:IPI00152906.6 |
| 18 | 0      | 4.15  | 20.630001 | IPI:IPI00020101.9 |
| 18 | 0      | 4.15  | 20.630001 | IPI:IPI00018534.4 |
| 18 | 0      | 4.07  | 20.630001 | IPI:IPI00515061.3 |

|    |      |      |           |                   |
|----|------|------|-----------|-------------------|
| 18 | 0    | 4.07 | 20.630001 | IPI:IPI00220403.3 |
| 18 | 0    | 4.07 | 20.630001 | IPI:IPI00152785.3 |
| 18 | 0    | 4.07 | 20.630001 | IPI:IPI00003935.6 |
| 18 | 0    | 4.06 | 20.630001 | IPI:IPI00166293.5 |
| 19 | 4.12 | 4.12 | 4.7619998 | IPI:IPI00554648.3 |
| 19 | 0    | 4.12 | 5.192     | IPI:IPI00787323.2 |
| 19 | 0    | 4.12 | 9.7050004 | IPI:IPI00793917.1 |
| 19 | 0    | 2.12 | 8.7839998 | IPI:IPI00795725.1 |
| 20 | 4    | 4    | 11.73     | IPI:IPI00911096.1 |
| 20 | 0    | 4    | 7.9860002 | IPI:IPI00909232.1 |
| 20 | 0    | 4    | 10.18     | IPI:IPI00759822.1 |
| 20 | 0    | 4    | 7.5159997 | IPI:IPI00477313.3 |
| 20 | 0    | 4    | 7.8500003 | IPI:IPI00216592.2 |
| 20 | 0    | 2.06 | 4.0959999 | IPI:IPI00887991.1 |
| 20 | 0    | 2.06 | 4.0959999 | IPI:IPI00735540.2 |
| 20 | 0    | 2.06 | 4.0959999 | IPI:IPI00027569.1 |
| 20 | 0    | 2    | 4.8       | IPI:IPI00759596.1 |
| 21 | 4    | 4    | 19.149999 | IPI:IPI00794545.1 |
| 21 | 0    | 4    | 11.79     | IPI:IPI00793322.1 |
| 21 | 0    | 4    | 10.71     | IPI:IPI00749113.2 |
| 21 | 0    | 4    | 16.46     | IPI:IPI00375015.3 |
| 21 | 0    | 4    | 10.71     | IPI:IPI00013679.1 |
| 22 | 3.7  | 3.7  | 13.04     | IPI:IPI00016342.1 |
| 22 | 0    | 3.7  | 23.08     | IPI:IPI00947210.1 |
| 22 | 0    | 2    | 14.29     | IPI:IPI00946776.1 |
| 22 | 0    | 2    | 8.7499999 | IPI:IPI00945574.1 |
| 22 | 0    | 2    | 10.45     | IPI:IPI00945337.1 |
| 22 | 0    | 1.7  | 8.6669996 | IPI:IPI00945735.1 |
| 23 | 3.54 | 3.54 | 17.649999 | IPI:IPI00293434.2 |
| 23 | 0    | 2    | 10.37     | IPI:IPI00878369.2 |
| 23 | 0    | 2    | 16.28     | IPI:IPI00790432.1 |
| 23 | 0    | 2    | 20        | IPI:IPI00789296.1 |
| 24 | 3.52 | 3.52 | 11.94     | IPI:IPI00028006.1 |
| 25 | 3.31 | 3.31 | 10.18     | IPI:IPI00217468.3 |
| 26 | 3.14 | 3.14 | 7.9099998 | IPI:IPI00746438.2 |
| 26 | 0    | 3.14 | 7.8649998 | IPI:IPI00376798.3 |
| 26 | 0    | 2.1  | 8.0459997 | IPI:IPI00647674.1 |
| 26 | 0    | 2.1  | 10.69     | IPI:IPI00647168.1 |
| 26 | 0    | 2.02 | 10.94     | IPI:IPI00878431.1 |
| 27 | 3.08 | 3.08 | 6.2070001 | IPI:IPI00027270.1 |
| 27 | 0    | 3.05 | 8.1820004 | IPI:IPI00789514.1 |
| 27 | 0    | 3.05 | 5.8820002 | IPI:IPI00433834.2 |
| 27 | 0    | 3.05 | 14.29     | IPI:IPI00792420.1 |
| 28 | 2.76 | 2.93 | 2.791     | IPI:IPI00554788.5 |
| 28 | 0    | 2.51 | 8.9550003 | IPI:IPI00794807.1 |
| 28 | 0    | 2.18 | 2.864     | IPI:IPI00941554.1 |
| 28 | 0    | 1.75 | 12.5      | IPI:IPI00795353.1 |
| 29 | 2.48 | 2.48 | 14.62     | IPI:IPI00291764.5 |
| 29 | 0    | 2.48 | 14.62     | IPI:IPI00255316.5 |

|    |      |      |           |                   |
|----|------|------|-----------|-------------------|
| 29 | 0    | 2.48 | 14.839999 | IPI:IPI00081836.3 |
| 29 | 0    | 2.48 | 14.62     | IPI:IPI00026272.2 |
| 29 | 0    | 2.48 | 14.839999 | IPI:IPI00552873.2 |
| 29 | 0    | 2.48 | 13.29     | IPI:IPI00219037.5 |
| 29 | 0    | 2.48 | 14.62     | IPI:IPI00216457.7 |
| 29 | 0    | 2.48 | 14.62     | IPI:IPI00216456.5 |
| 29 | 0    | 2.48 | 14.62     | IPI:IPI00031562.3 |
| 29 | 0    | 2.48 | 14.73     | IPI:IPI00339274.5 |
| 29 | 0    | 2.48 | 14.73     | IPI:IPI00220855.3 |
| 29 | 0    | 2.48 | 14.62     | IPI:IPI00216730.3 |
| 29 | 0    | 2.48 | 14.5      | IPI:IPI00045109.3 |
| 29 | 0    | 2    | 17.120001 | IPI:IPI00930144.1 |
| 30 | 2.43 | 2.43 | 6.6179998 | IPI:IPI00465070.7 |
| 30 | 0    | 2.43 | 6.6179998 | IPI:IPI00216402.3 |
| 30 | 0    | 2.43 | 6.6179998 | IPI:IPI00171611.7 |
| 30 | 0    | 2.42 | 6.6179998 | IPI:IPI00455457.4 |
| 30 | 0    | 2.18 | 7.965     | IPI:IPI00909530.1 |
| 30 | 0    | 2.18 | 6.6179998 | IPI:IPI00219038.9 |
| 30 | 0    | 2.17 | 7.965     | IPI:IPI00793280.1 |
| 30 | 0    | 2.17 | 7.3169999 | IPI:IPI00477080.1 |
| 30 | 0    | 2.17 | 6.6670001 | IPI:IPI00419884.3 |
| 30 | 0    | 2    | 8.4109999 | IPI:IPI00942498.1 |
| 30 | 0    | 2    | 6.3830003 | IPI:IPI00886860.2 |
| 30 | 0    | 2    | 8.7379999 | IPI:IPI00792719.1 |
| 31 | 2.35 | 2.35 | 6.3579999 | IPI:IPI00922662.1 |
| 31 | 0    | 2.35 | 6.3579999 | IPI:IPI00917079.1 |
| 31 | 0    | 2.35 | 5.4730002 | IPI:IPI00896425.1 |
| 31 | 0    | 2.35 | 7.801     | IPI:IPI00334174.3 |
| 31 | 0    | 2.35 | 8.5270002 | IPI:IPI00185217.4 |
| 31 | 0    | 2.35 | 5.4730002 | IPI:IPI00008964.3 |
| 31 | 0    | 2.35 | 5.3660002 | IPI:IPI00005719.1 |
| 31 | 0    | 2.34 | 5.3660002 | IPI:IPI00937805.2 |
| 31 | 0    | 2.34 | 5.4730002 | IPI:IPI00374519.3 |
| 31 | 0    | 1.71 | 6.7479998 | IPI:IPI00022134.1 |
| 31 | 0    | 1.7  | 6.6270001 | IPI:IPI00793203.1 |
| 31 | 0    | 1.7  | 5.314     | IPI:IPI00028481.1 |
| 31 | 0    | 1.7  | 7.237     | IPI:IPI00953892.1 |
| 31 | 0    | 1.7  | 6.8750001 | IPI:IPI00910398.1 |
| 31 | 0    | 1.7  | 5.314     | IPI:IPI00909683.1 |
| 31 | 0    | 1.7  | 5.1890001 | IPI:IPI00394882.2 |
| 31 | 0    | 1.7  | 5.288     | IPI:IPI00383449.2 |
| 31 | 0    | 1.7  | 5.4730002 | IPI:IPI00300096.4 |
| 31 | 0    | 1.7  | 5.314     | IPI:IPI00024282.1 |
| 31 | 0    | 1.7  | 6.6270001 | IPI:IPI00956025.1 |
| 31 | 0    | 1.7  | 9.3220003 | IPI:IPI00941177.1 |
| 31 | 0    | 1.7  | 13.58     | IPI:IPI00903040.1 |
| 31 | 0    | 1.7  | 3.3640001 | IPI:IPI00877662.2 |
| 31 | 0    | 1.7  | 11.96     | IPI:IPI00790414.1 |
| 31 | 0    | 1.7  | 22.920001 | IPI:IPI00789827.1 |

|    |      |      |           |                   |
|----|------|------|-----------|-------------------|
| 31 | 0    | 1.7  | 7.237     | IPI:IPI00556414.1 |
| 31 | 0    | 1.7  | 5.5       | IPI:IPI00016513.5 |
| 31 | 0    | 1.7  | 5.4189999 | IPI:IPI00016373.3 |
| 32 | 2.12 | 2.12 | 2.981     | IPI:IPI00744148.2 |
| 32 | 0    | 2.12 | 2.957     | IPI:IPI00304171.6 |
| 32 | 0    | 2.12 | 2.9650001 | IPI:IPI00059366.4 |
| 32 | 0    | 2.12 | 5.5       | IPI:IPI00910098.1 |
| 32 | 0    | 2.12 | 5.7289999 | IPI:IPI00148096.2 |
| 33 | 2    | 2    | 5.556     | IPI:IPI00893032.1 |
| 33 | 0    | 2    | 5.0719999 | IPI:IPI00640155.1 |
| 33 | 0    | 2    | 5.556     | IPI:IPI00552984.1 |
| 33 | 0    | 2    | 5.0719999 | IPI:IPI00000783.1 |
| 33 | 0    | 2    | 5.147     | IPI:IPI00215824.1 |
| 34 | 2    | 2    | 7.3530003 | IPI:IPI00008433.4 |
| 35 | 2    | 2    | 7.0749998 | IPI:IPI00909773.1 |
| 35 | 0    | 2    | 9.7400002 | IPI:IPI00021347.1 |
| 35 | 0    | 2    | 12.3      | IPI:IPI00909975.1 |
| 36 | 2    | 2    | 16.940001 | IPI:IPI00843996.1 |
| 36 | 0    | 2    | 12.800001 | IPI:IPI00010204.1 |
| 37 | 2    | 2    | 6.701     | IPI:IPI00789159.1 |
| 37 | 0    | 2    | 8.3329998 | IPI:IPI00176755.4 |
| 37 | 0    | 2    | 8.2280003 | IPI:IPI00794894.1 |
| 37 | 0    | 2    | 8.2280003 | IPI:IPI00793523.1 |
| 37 | 0    | 2    | 8.3329998 | IPI:IPI00021266.1 |
| 37 | 0    | 2    | 8.3329998 | IPI:IPI00923578.1 |
| 38 | 2    | 2    | 5.618     | IPI:IPI00219445.1 |
| 38 | 0    | 2    | 5.906     | IPI:IPI00030243.1 |
| 39 | 2    | 2    | 22.579999 | IPI:IPI00917646.1 |
| 39 | 0    | 2    | 13.860001 | IPI:IPI00917509.1 |
| 39 | 0    | 2    | 7.6499999 | IPI:IPI00297579.4 |
| 40 | 2    | 2    | 3.1550001 | IPI:IPI00916517.1 |
| 40 | 0    | 2    | 2.933     | IPI:IPI00414696.1 |
| 40 | 0    | 2    | 2.833     | IPI:IPI00396378.3 |
| 41 | 2    | 2    | 9.7010002 | IPI:IPI00642457.1 |
| 41 | 0    | 2    | 7.2219998 | IPI:IPI00218693.8 |
| 42 | 2    | 2    | 6.5870002 | IPI:IPI00911088.1 |
| 42 | 0    | 2    | 6.1799999 | IPI:IPI00871870.1 |
| 42 | 0    | 2    | 20        | IPI:IPI00797967.1 |
| 42 | 0    | 2    | 11.11     | IPI:IPI00796102.1 |
| 42 | 0    | 2    | 6.1799999 | IPI:IPI00005162.3 |
| 43 | 2    | 2    | 7.4320003 | IPI:IPI00456758.4 |
| 44 | 1.72 | 1.72 | 3.571     | IPI:IPI00004450.2 |
| 44 | 0    | 1.72 | 3.5810001 | IPI:IPI00304692.1 |
| 44 | 0    | 1.72 | 7.1429998 | IPI:IPI00552938.2 |
| 44 | 0    | 1.52 | 1.312     | IPI:IPI00167369.2 |
| 44 | 0    | 1.52 | 3.59      | IPI:IPI00061178.1 |
| 44 | 0    | 1.52 | 8.805     | IPI:IPI00643486.1 |
| 45 | 1.7  | 3.45 | 8.9489996 | IPI:IPI00647280.2 |
| 45 | 0    | 3.45 | 9.8710001 | IPI:IPI00938009.1 |



|    |      |      |           |                   |
|----|------|------|-----------|-------------------|
| 45 | 0    | 3.45 | 14.29     | IPI:IPI00639945.1 |
| 45 | 0    | 3.45 | 8.4870003 | IPI:IPI00011937.1 |
| 46 | 1.7  | 1.7  | 8.9659996 | IPI:IPI00479058.2 |
| 47 | 1.67 | 1.67 | 8.721     | IPI:IPI00478810.1 |
| 47 | 0    | 1.67 | 9.0910003 | IPI:IPI00008438.1 |
| 47 | 0    | 1.65 | 11.28     | IPI:IPI00414852.3 |
| 48 | 1.56 | 1.56 | 0         | IPI:IPI00478287.2 |
| 48 | 0    | 1.56 | 0         | IPI:IPI00013415.1 |
| 48 | 0    | 1.56 | 0         | IPI:IPI00798077.1 |
| 48 | 0    | 1.56 | 0         | IPI:IPI00796554.1 |
| 48 | 0    | 1.5  | 0         | IPI:IPI00893703.1 |
| 49 | 1.55 | 1.55 | 1.863     | IPI:IPI00220327.4 |
| 50 | 1.31 | 1.31 | 7.8050002 | IPI:IPI00028004.2 |

S26

| N | Unused | Total | %Cov(95)  | Accession         |
|---|--------|-------|-----------|-------------------|
| 1 | 13.99  | 13.99 | 39.390001 | IPI:IPI00419585.9 |
| 2 | 13.83  | 13.83 | 42.699999 | IPI:IPI00795292.1 |
| 2 | 0      | 13.83 | 39.039999 | IPI:IPI00604590.3 |
| 2 | 0      | 11.83 | 37.5      | IPI:IPI00026260.1 |
| 3 | 11     | 11    | 51.459998 | IPI:IPI00453473.6 |
| 4 | 7.98   | 7.98  | 22.050001 | IPI:IPI00759824.2 |
| 4 | 0      | 7.98  | 17.129999 | IPI:IPI00007423.1 |
| 5 | 7.26   | 7.26  | 20        | IPI:IPI00215780.5 |
| 6 | 6.94   | 6.94  | 32.47     | IPI:IPI00218733.6 |
| 6 | 0      | 4.94  | 26.67     | IPI:IPI00789078.1 |
| 7 | 6.5    | 6.5   | 26.87     | IPI:IPI00930174.1 |
| 7 | 0      | 6.5   | 28.569999 | IPI:IPI00815755.1 |
| 7 | 0      | 6.5   | 21.690001 | IPI:IPI00646240.3 |
| 7 | 0      | 6.5   | 28.569999 | IPI:IPI00477495.3 |
| 7 | 0      | 6.5   | 28.569999 | IPI:IPI00419833.9 |
| 7 | 0      | 6.5   | 28.569999 | IPI:IPI00329665.8 |
| 7 | 0      | 6.5   | 28.569999 | IPI:IPI00303133.8 |
| 7 | 0      | 6.5   | 28.569999 | IPI:IPI00020101.9 |
| 7 | 0      | 6.5   | 28.569999 | IPI:IPI00018534.4 |
| 7 | 0      | 6.49  | 28.569999 | IPI:IPI00554798.2 |
| 7 | 0      | 6.49  | 21.690001 | IPI:IPI00794461.1 |
| 7 | 0      | 6.49  | 28.569999 | IPI:IPI00152906.6 |
| 7 | 0      | 6.49  | 28.569999 | IPI:IPI00930570.1 |
| 8 | 5.99   | 5.99  | 16.91     | IPI:IPI00465070.7 |
| 8 | 0      | 5.99  | 16.91     | IPI:IPI00171611.7 |
| 8 | 0      | 5.04  | 16.91     | IPI:IPI00455457.4 |
| 8 | 0      | 4.86  | 16.91     | IPI:IPI00216402.3 |
| 8 | 0      | 4.47  | 7.965     | IPI:IPI00909530.1 |
| 8 | 0      | 4.47  | 6.6179998 | IPI:IPI00219038.9 |
| 8 | 0      | 4.43  | 7.3169999 | IPI:IPI00477080.1 |
| 8 | 0      | 4.16  | 8.4109999 | IPI:IPI00942498.1 |
| 9 | 5.98   | 5.98  | 17.68     | IPI:IPI00925334.1 |
| 9 | 0      | 5.98  | 17.110001 | IPI:IPI00925052.1 |

|    |      |      |           |                   |
|----|------|------|-----------|-------------------|
| 9  | 0    | 5.98 | 19.050001 | IPI:IPI00554811.2 |
| 9  | 0    | 5.83 | 28.32     | IPI:IPI00926232.1 |
| 9  | 0    | 5.83 | 5.1199999 | IPI:IPI00790262.1 |
| 9  | 0    | 5.55 | 19.159999 | IPI:IPI00926054.1 |
| 9  | 0    | 5.4  | 20.51     | IPI:IPI00965750.1 |
| 9  | 0    | 5.4  | 20.51     | IPI:IPI00386354.1 |
| 9  | 0    | 4    | 44.679999 | IPI:IPI00924833.1 |
| 10 | 5.72 | 5.72 | 10.86     | IPI:IPI00217466.3 |
| 10 | 0    | 5.72 | 11.27     | IPI:IPI00217465.5 |
| 10 | 0    | 5.72 | 10.96     | IPI:IPI00217467.3 |
| 11 | 5.34 | 5.34 | 14.380001 | IPI:IPI00397701.3 |
| 11 | 0    | 5.34 | 14.380001 | IPI:IPI00221092.8 |
| 11 | 0    | 4.17 | 13.82     | IPI:IPI00450975.1 |
| 12 | 5.1  | 5.1  | 16.91     | IPI:IPI00293434.2 |
| 12 | 0    | 3.7  | 15.91     | IPI:IPI00788736.1 |
| 13 | 4.85 | 4.85 | 16.08     | IPI:IPI00218606.7 |
| 13 | 0    | 3.15 | 8.9550003 | IPI:IPI00966986.1 |
| 13 | 0    | 3.15 | 8.9550003 | IPI:IPI00965899.1 |
| 14 | 4.64 | 4.64 | 15.2      | IPI:IPI00012750.3 |
| 15 | 4.6  | 4.6  | 14.839999 | IPI:IPI00552873.2 |
| 15 | 0    | 4.6  | 14.73     | IPI:IPI00339274.5 |
| 15 | 0    | 4.6  | 14.62     | IPI:IPI00291764.5 |
| 15 | 0    | 4.6  | 14.62     | IPI:IPI00255316.5 |
| 15 | 0    | 4.6  | 14.62     | IPI:IPI00216457.7 |
| 15 | 0    | 4.6  | 14.839999 | IPI:IPI00081836.3 |
| 15 | 0    | 4.6  | 14.73     | IPI:IPI00220855.3 |
| 15 | 0    | 3.6  | 13.29     | IPI:IPI00219037.5 |
| 15 | 0    | 3.6  | 14.62     | IPI:IPI00216456.5 |
| 15 | 0    | 3.6  | 14.62     | IPI:IPI00031562.3 |
| 15 | 0    | 3.6  | 14.62     | IPI:IPI00026272.2 |
| 15 | 0    | 3.6  | 14.5      | IPI:IPI00045109.3 |
| 15 | 0    | 3.55 | 17.120001 | IPI:IPI00930144.1 |
| 15 | 0    | 3.05 | 14.62     | IPI:IPI00216730.3 |
| 15 | 0    | 2.6  | 0         | IPI:IPI00102165.4 |
| 16 | 4.05 | 4.05 | 3.2499999 | IPI:IPI00479145.2 |
| 16 | 0    | 4.05 | 2.3089999 | IPI:IPI00789324.3 |
| 16 | 0    | 3.65 | 5.804     | IPI:IPI00790191.1 |
| 17 | 4    | 4    | 15.889999 | IPI:IPI00026271.5 |
| 18 | 3.58 | 3.58 | 8.0880001 | IPI:IPI00219155.5 |
| 18 | 0    | 2.42 | 13.75     | IPI:IPI00790294.1 |
| 19 | 3.52 | 3.52 | 13.940001 | IPI:IPI00473014.5 |
| 19 | 0    | 2    | 11.65     | IPI:IPI00935521.1 |
| 19 | 0    | 1.52 | 4.3650001 | IPI:IPI00888288.1 |
| 19 | 0    | 1.52 | 7.6389998 | IPI:IPI00869284.2 |
| 19 | 0    | 1.52 | 7.4320003 | IPI:IPI00845388.1 |
| 19 | 0    | 1.52 | 5.528     | IPI:IPI00788232.1 |
| 19 | 0    | 1.52 | 4.3650001 | IPI:IPI00786968.2 |
| 20 | 3.47 | 5    | 5.7519998 | IPI:IPI00217468.3 |
| 21 | 3.43 | 3.43 | 11.67     | IPI:IPI00215918.3 |

|    |      |      |           |                   |
|----|------|------|-----------|-------------------|
| 21 | 0.88 | 2.4  | 6.3579999 | IPI:IPI00930263.1 |
| 21 | 0    | 3.36 | 16.54     | IPI:IPI00792330.2 |
| 21 | 0    | 2.4  | 7.6389998 | IPI:IPI00797941.2 |
| 21 | 0    | 2.4  | 6.0770001 | IPI:IPI00215917.3 |
| 21 | 0    | 2.4  | 6.0770001 | IPI:IPI00215914.5 |
| 21 | 0    | 2.02 | 6.4709999 | IPI:IPI00930413.1 |
| 21 | 0    | 2.02 | 7.051     | IPI:IPI00910783.1 |
| 21 | 0    | 1.91 | 4.803     | IPI:IPI00909515.1 |
| 21 | 0    | 1.91 | 7.333     | IPI:IPI00853337.1 |
| 21 | 0    | 1.91 | 6.1110001 | IPI:IPI00215919.5 |
| 21 | 0    | 1.91 | 6.5360002 | IPI:IPI00946929.1 |
| 21 | 0    | 1.52 | 18.64     | IPI:IPI00947463.1 |
| 21 | 0    | 1.52 | 19.64     | IPI:IPI00944969.1 |
| 21 | 0    | 1.52 | 9.1669999 | IPI:IPI00789027.1 |
| 22 | 2.57 | 2.57 | 2.703     | IPI:IPI00890717.1 |
| 22 | 0    | 2.57 | 6.803     | IPI:IPI00472498.3 |
| 22 | 0    | 2.57 | 5.8820002 | IPI:IPI00447356.1 |
| 22 | 0    | 2.57 | 2.703     | IPI:IPI00397947.1 |
| 22 | 0    | 2.57 | 5.8820002 | IPI:IPI00030962.7 |
| 22 | 0    | 2.57 | 4.5249999 | IPI:IPI00019599.1 |
| 22 | 0    | 2.24 | 9.5239997 | IPI:IPI00514724.1 |
| 22 | 0    | 2.23 | 9.7089998 | IPI:IPI00789287.1 |
| 22 | 0    | 2.23 | 6.8970002 | IPI:IPI00019600.3 |
| 22 | 0    | 2.05 | 6.7110002 | IPI:IPI00797889.1 |
| 22 | 0    | 2.05 | 11.24     | IPI:IPI00965965.1 |
| 23 | 2.11 | 2.11 | 7.7919997 | IPI:IPI00855924.1 |
| 23 | 0    | 2.11 | 7.7919997 | IPI:IPI00411704.9 |
| 23 | 0    | 2.11 | 6.5219998 | IPI:IPI00376005.2 |
| 24 | 2.02 | 2.02 | 3.3849999 | IPI:IPI00847331.1 |
| 24 | 0    | 2.02 | 3.3849999 | IPI:IPI00646831.1 |
| 24 | 0    | 2.02 | 3.3849999 | IPI:IPI00022381.6 |
| 25 | 2    | 2    | 16.670001 | IPI:IPI00943752.1 |
| 25 | 0    | 2    | 8.7719999 | IPI:IPI00936744.1 |
| 25 | 0    | 2    | 11.54     | IPI:IPI00935624.1 |
| 25 | 0    | 2    | 7.6140001 | IPI:IPI00935556.1 |
| 25 | 0    | 2    | 16.670001 | IPI:IPI00217950.5 |
| 26 | 1.8  | 1.8  | 0         | IPI:IPI00013296.3 |
| 26 | 0    | 1.71 | 0         | IPI:IPI00790711.1 |
| 26 | 0    | 1.71 | 0         | IPI:IPI00397609.2 |
| 27 | 1.52 | 1.92 | 1.914     | IPI:IPI00942338.1 |
| 27 | 0    | 1.92 | 1.86      | IPI:IPI00554788.5 |
| 27 | 0    | 1.52 | 5.9700001 | IPI:IPI00794807.1 |
| 27 | 0    | 1.52 | 14.040001 | IPI:IPI00793702.1 |
| 28 | 1.4  | 1.4  | 10.64     | IPI:IPI00796342.1 |
| 28 | 0    | 1.4  | 6.5789998 | IPI:IPI00003949.1 |
| 28 | 0    | 1.4  | 6.944     | IPI:IPI00874051.1 |
| 28 | 0    | 1.4  | 6.5360002 | IPI:IPI00376844.1 |
| 29 | 1.4  | 1.4  | 5.435     | IPI:IPI00450472.3 |
| 29 | 0    | 1.4  | 6.329     | IPI:IPI00032957.1 |

30 1.31 1.31 0 IPI:IPI00221089.5

S27

| N  | Unused | Total | %Cov(95)  | Accession          |
|----|--------|-------|-----------|--------------------|
| 1  | 10.27  | 10.27 | 32.210001 | IPI:IPI00795292.1  |
| 1  | 0      | 10.27 | 29.449999 | IPI:IPI00604590.3  |
| 1  | 0      | 9.15  | 31.580001 | IPI:IPI00026260.1  |
| 2  | 10.05  | 10.05 | 36.430001 | IPI:IPI00216691.5  |
| 3  | 8.88   | 8.88  | 33.98     | IPI:IPI00453473.6  |
| 4  | 7.3    | 7.3   | 23.62     | IPI:IPI00221222.7  |
| 4  | 0      | 7.05  | 24.39     | IPI:IPI00964232.1  |
| 4  | 0      | 6.05  | 35.710001 | IPI:IPI00963960.1  |
| 5  | 6.49   | 6.49  | 18.23     | IPI:IPI00913961.2  |
| 5  | 0      | 6.49  | 25.780001 | IPI:IPI00018278.3  |
| 5  | 0      | 6.49  | 25.780001 | IPI:IPI00249267.2  |
| 5  | 0      | 6.49  | 25.780001 | IPI:IPI00218448.4  |
| 5  | 0      | 4.8   | 23.53     | IPI:IPI00398798.2  |
| 5  | 0      | 4.8   | 26.67     | IPI:IPI00398806.2  |
| 5  | 0      | 4.49  | 15.57     | IPI:IPI00926183.1  |
| 5  | 0      | 4.49  | 16.670001 | IPI:IPI00141938.4  |
| 6  | 5.18   | 5.18  | 14.579999 | IPI:IPI00874051.1  |
| 6  | 0      | 5.18  | 13.82     | IPI:IPI00003949.1  |
| 6  | 0      | 5.13  | 13.73     | IPI:IPI00376844.1  |
| 7  | 4.92   | 4.92  | 25.260001 | IPI:IPI00878392.1  |
| 7  | 0      | 4.92  | 18.75     | IPI:IPI00219153.4  |
| 8  | 4.53   | 4.53  | 13.330001 | IPI:IPI00007797.3  |
| 8  | 0      | 4.5   | 13.330001 | IPI:IPI00737213.2  |
| 9  | 4.1    | 4.1   | 16.2      | IPI:IPI00794659.1  |
| 9  | 0      | 4.1   | 19.329999 | IPI:IPI00012493.1  |
| 9  | 0      | 2.1   | 18.03     | IPI:IPI00791265.1  |
| 10 | 4.05   | 4.05  | 20.87     | IPI:IPI00187140.1  |
| 10 | 0      | 4.05  | 20.87     | IPI:IPI00795435.1  |
| 10 | 0      | 4.05  | 20.87     | IPI:IPI00655650.2  |
| 10 | 0      | 4.05  | 20.87     | IPI:IPI00787644.2  |
| 11 | 3.67   | 3.67  | 4.569     | IPI:IPI00219718.3  |
| 11 | 0      | 3.67  | 6.6670001 | IPI:IPI00940513.1  |
| 11 | 0      | 3.66  | 5.8820002 | IPI:IPI00953392.1  |
| 11 | 0      | 3.66  | 4.9449999 | IPI:IPI00791403.1  |
| 11 | 0      | 3.66  | 5.9999999 | IPI:IPI00966782.1  |
| 11 | 0      | 1.86  | 0         | IPI:IPI00792535.1  |
| 12 | 3.4    | 3.4   | 36.51     | IPI:IPI00965414.1  |
| 12 | 0      | 3.4   | 13.14     | IPI:IPI00884107.1  |
| 12 | 0      | 3.4   | 21.9      | IPI:IPI00796636.14 |
| 12 | 0      | 3.4   | 15.65     | IPI:IPI00654755.3  |
| 13 | 2.85   | 2.85  | 7.9369999 | IPI:IPI00017964.1  |
| 13 | 0      | 2.85  | 5.714     | IPI:IPI00879750.1  |
| 13 | 0      | 2.85  | 8.3329998 | IPI:IPI00878876.1  |
| 14 | 2.49   | 2.49  | 10.43     | IPI:IPI00872940.1  |
| 14 | 0      | 2.49  | 10.43     | IPI:IPI00219156.7  |

|    |      |       |           |                   |
|----|------|-------|-----------|-------------------|
| 14 | 0    | 2.48  | 21.430001 | IPI:IPI00794745.1 |
| 15 | 2.33 | 2.33  | 13.19     | IPI:IPI00790142.1 |
| 15 | 0    | 2.33  | 16.9      | IPI:IPI00745893.2 |
| 15 | 0    | 2.33  | 12.630001 | IPI:IPI00299149.1 |
| 15 | 0    | 2.33  | 12.630001 | IPI:IPI00140827.3 |
| 15 | 0    | 2.11  | 12.630001 | IPI:IPI00434968.2 |
| 15 | 0    | 2     | 8.8890001 | IPI:IPI00793687.1 |
| 15 | 0    | 2     | 8.5110001 | IPI:IPI00909492.1 |
| 15 | 0    | 2     | 8.1629999 | IPI:IPI00798011.1 |
| 15 | 0    | 2     | 11.65     | IPI:IPI00299147.8 |
| 16 | 2.26 | 2.26  | 6.8489999 | IPI:IPI00397701.3 |
| 16 | 0    | 2.26  | 6.8489999 | IPI:IPI00221092.8 |
| 16 | 0    | 2     | 6.5789998 | IPI:IPI00450975.1 |
| 17 | 2.14 | 2.14  | 8.7300003 | IPI:IPI00815755.1 |
| 17 | 0    | 2.14  | 6.6270001 | IPI:IPI00794461.1 |
| 17 | 0    | 2.14  | 8.7300003 | IPI:IPI00477495.3 |
| 17 | 0    | 2.14  | 8.7300003 | IPI:IPI00419833.9 |
| 17 | 0    | 2.14  | 8.7300003 | IPI:IPI00020101.9 |
| 17 | 0    | 2.14  | 8.7300003 | IPI:IPI00930570.1 |
| 17 | 0    | 2.14  | 8.2089998 | IPI:IPI00930174.1 |
| 17 | 0    | 2.14  | 6.6270001 | IPI:IPI00646240.3 |
| 17 | 0    | 2.14  | 8.7300003 | IPI:IPI00554798.2 |
| 17 | 0    | 2.14  | 8.7300003 | IPI:IPI00329665.8 |
| 17 | 0    | 2.14  | 8.7300003 | IPI:IPI00303133.8 |
| 17 | 0    | 2.14  | 8.7300003 | IPI:IPI00152906.6 |
| 17 | 0    | 2.14  | 8.7300003 | IPI:IPI00018534.4 |
| 17 | 0    | 2.13  | 8.7300003 | IPI:IPI00515061.3 |
| 17 | 0    | 2.13  | 8.7300003 | IPI:IPI00003935.6 |
| 17 | 0    | 2.13  | 8.6609997 | IPI:IPI00465363.3 |
| 17 | 0    | 2.13  | 8.7300003 | IPI:IPI00220403.3 |
| 17 | 0    | 2.13  | 8.7300003 | IPI:IPI00152785.3 |
| 17 | 0    | 2.1   | 8.7300003 | IPI:IPI00166293.5 |
| 18 | 2.01 | 2.01  | 8.5709997 | IPI:IPI00798216.1 |
| 18 | 0    | 2.01  | 1.289     | IPI:IPI00022463.1 |
| 19 | 2    | 10.04 | 29.38     | IPI:IPI00375531.2 |
| 19 | 0    | 10.04 | 34.209999 | IPI:IPI00012048.1 |
| 19 | 0    | 4     | 36.469999 | IPI:IPI00791971.1 |
| 20 | 2    | 2     | 5.9360001 | IPI:IPI00217467.3 |
| 20 | 0    | 2     | 5.8820002 | IPI:IPI00217466.3 |
| 20 | 0    | 2     | 6.103     | IPI:IPI00217465.5 |
| 21 | 2    | 2     | 7.6140001 | IPI:IPI00935556.1 |
| 21 | 0    | 2     | 16.670001 | IPI:IPI00943752.1 |
| 21 | 0    | 2     | 8.7719999 | IPI:IPI00936744.1 |
| 21 | 0    | 2     | 11.54     | IPI:IPI00935624.1 |
| 21 | 0    | 2     | 16.670001 | IPI:IPI00217950.5 |
| 22 | 2    | 2     | 7.801     | IPI:IPI00478393.4 |
| 22 | 0    | 2     | 7.4320003 | IPI:IPI00749013.2 |
| 22 | 0    | 2     | 7.3830001 | IPI:IPI00375142.2 |
| 22 | 0    | 2     | 7.4830003 | IPI:IPI00332376.4 |

|    |      |      |           |                   |
|----|------|------|-----------|-------------------|
| 22 | 0    | 2    | 7.4830003 | IPI:IPI00026965.1 |
| 22 | 0    | 2    | 11.22     | IPI:IPI00967041.1 |
| 22 | 0    | 2    | 9.3220003 | IPI:IPI00967006.1 |
| 22 | 0    | 2    | 15.279999 | IPI:IPI00966744.1 |
| 22 | 0    | 2    | 9.3220003 | IPI:IPI00019932.4 |
| 23 | 2    | 2    | 6.8970002 | IPI:IPI00215780.5 |
| 24 | 2    | 2    | 13.249999 | IPI:IPI00645361.1 |
| 24 | 0    | 2    | 6.5090001 | IPI:IPI00006579.1 |
| 25 | 1.86 | 1.86 | 6.6179998 | IPI:IPI00216402.3 |
| 25 | 0    | 1.85 | 7.965     | IPI:IPI00909530.1 |
| 25 | 0    | 1.85 | 6.6179998 | IPI:IPI00465070.7 |
| 25 | 0    | 1.85 | 6.6179998 | IPI:IPI00219038.9 |
| 25 | 0    | 1.85 | 6.6179998 | IPI:IPI00171611.7 |
| 25 | 0    | 1.84 | 7.3169999 | IPI:IPI00477080.1 |
| 25 | 0    | 1.83 | 6.6670001 | IPI:IPI00419884.3 |
| 25 | 0    | 1.82 | 6.6179998 | IPI:IPI00455457.4 |
| 25 | 0    | 1.82 | 7.965     | IPI:IPI00793280.1 |
| 25 | 0    | 1.72 | 8.4109999 | IPI:IPI00942498.1 |
| 25 | 0    | 1.7  | 6.3830003 | IPI:IPI00886860.2 |
| 25 | 0    | 1.7  | 8.7379999 | IPI:IPI00792719.1 |
| 26 | 1.82 | 1.82 | 6.8180002 | IPI:IPI00219533.3 |
| 27 | 1.75 | 4.25 | 15.38     | IPI:IPI00216456.5 |
| 27 | 0    | 4.25 | 15.38     | IPI:IPI00031562.3 |
| 27 | 0    | 4.25 | 15.38     | IPI:IPI00026272.2 |
| 28 | 1.72 | 1.72 | 11.39     | IPI:IPI00917675.1 |
| 28 | 0    | 1.72 | 6.9229998 | IPI:IPI00917298.1 |
| 28 | 0    | 1.72 | 8.3329998 | IPI:IPI00916572.1 |
| 28 | 0    | 1.72 | 7.5000003 | IPI:IPI00916315.1 |
| 28 | 0    | 1.72 | 7.8259997 | IPI:IPI00915795.1 |
| 28 | 0    | 1.72 | 7.4380003 | IPI:IPI00856058.1 |
| 28 | 0    | 1.72 | 7.0309997 | IPI:IPI00848331.1 |
| 28 | 0    | 1.72 | 7.1999997 | IPI:IPI00026302.3 |
| 29 | 1.52 | 1.52 | 2.637     | IPI:IPI00935311.1 |
| 29 | 0    | 1.52 | 2.6319999 | IPI:IPI00792837.1 |
| 29 | 0    | 1.52 | 2.908     | IPI:IPI00788670.1 |
| 29 | 0    | 1.52 | 2.808     | IPI:IPI00219759.1 |
| 29 | 0    | 1.52 | 2.72      | IPI:IPI00013457.1 |
| 30 | 1.47 | 1.47 | 10.56     | IPI:IPI00410714.5 |
| 31 | 1.44 | 1.44 | 0         | IPI:IPI00550239.4 |
| 32 | 1.4  | 1.4  | 8.6709999 | IPI:IPI00056357.3 |
| 33 | 1.33 | 1.33 | 0         | IPI:IPI00939558.1 |
| 33 | 0    | 1.33 | 0         | IPI:IPI00816796.1 |
| 33 | 0    | 1.33 | 0         | IPI:IPI00304692.1 |

S28

| N | Unused | Total | %Cov(95)  | Accession         |
|---|--------|-------|-----------|-------------------|
| 1 | 18.02  | 18.02 | 67.140001 | IPI:IPI00216691.5 |
| 2 | 13.08  | 13.08 | 9.3170002 | IPI:IPI00220327.4 |
| 3 | 10.82  | 10.82 | 27.410001 | IPI:IPI00219718.3 |

|    |       |       |           |                    |
|----|-------|-------|-----------|--------------------|
| 3  | 0     | 10.82 | 40.000001 | IPI:IPI00940513.1  |
| 3  | 0     | 10.81 | 35.29     | IPI:IPI00953392.1  |
| 3  | 0     | 10.81 | 29.67     | IPI:IPI00791403.1  |
| 3  | 0     | 10.81 | 36.000001 | IPI:IPI00966782.1  |
| 4  | 10.45 | 10.45 | 43.689999 | IPI:IPI00453473.6  |
| 5  | 6.41  | 6.41  | 26.87     | IPI:IPI00930174.1  |
| 5  | 0     | 6.41  | 21.690001 | IPI:IPI00794461.1  |
| 5  | 0     | 6.41  | 21.690001 | IPI:IPI00646240.3  |
| 5  | 0     | 6.41  | 28.569999 | IPI:IPI00329665.8  |
| 5  | 0     | 6.41  | 28.569999 | IPI:IPI00303133.8  |
| 5  | 0     | 6.41  | 28.569999 | IPI:IPI00930570.1  |
| 5  | 0     | 6.41  | 28.569999 | IPI:IPI00815755.1  |
| 5  | 0     | 6.41  | 28.569999 | IPI:IPI00554798.2  |
| 5  | 0     | 6.41  | 28.569999 | IPI:IPI00477495.3  |
| 5  | 0     | 6.41  | 28.569999 | IPI:IPI00419833.9  |
| 5  | 0     | 6.41  | 28.569999 | IPI:IPI00152906.6  |
| 5  | 0     | 6.41  | 28.569999 | IPI:IPI00020101.9  |
| 5  | 0     | 6.41  | 28.569999 | IPI:IPI00018534.4  |
| 6  | 6.41  | 6.41  | 34.779999 | IPI:IPI00872940.1  |
| 6  | 0     | 6.41  | 34.779999 | IPI:IPI00219156.7  |
| 7  | 4.96  | 4.96  | 17.01     | IPI:IPI00654755.3  |
| 7  | 0     | 2.96  | 8.1629999 | IPI:IPI00473011.3  |
| 7  | 0     | 2.96  | 20.630001 | IPI:IPI00965414.1  |
| 7  | 0     | 2.96  | 7.429     | IPI:IPI00884107.1  |
| 7  | 0     | 2.96  | 12.38     | IPI:IPI00796636.14 |
| 8  | 4.52  | 4.52  | 18.179999 | IPI:IPI00013917.3  |
| 9  | 4.39  | 4.39  | 14.839999 | IPI:IPI00552873.2  |
| 9  | 0     | 4.39  | 14.73     | IPI:IPI00339274.5  |
| 9  | 0     | 4.39  | 14.62     | IPI:IPI00291764.5  |
| 9  | 0     | 4.39  | 14.62     | IPI:IPI00255316.5  |
| 9  | 0     | 4.39  | 14.62     | IPI:IPI00216457.7  |
| 9  | 0     | 4.39  | 14.839999 | IPI:IPI00081836.3  |
| 9  | 0     | 4.39  | 14.73     | IPI:IPI00220855.3  |
| 9  | 0     | 4.32  | 13.29     | IPI:IPI00219037.5  |
| 9  | 0     | 4.32  | 14.62     | IPI:IPI00216456.5  |
| 9  | 0     | 4.32  | 14.5      | IPI:IPI00045109.3  |
| 9  | 0     | 4.32  | 14.62     | IPI:IPI00031562.3  |
| 9  | 0     | 4.32  | 14.62     | IPI:IPI00026272.2  |
| 9  | 0     | 3.64  | 14.62     | IPI:IPI00216730.3  |
| 9  | 0     | 3.47  | 17.120001 | IPI:IPI00930144.1  |
| 9  | 0     | 2.39  | 0         | IPI:IPI00102165.4  |
| 10 | 4.02  | 4.02  | 6.6670001 | IPI:IPI00007797.3  |
| 10 | 0     | 4.02  | 6.6670001 | IPI:IPI00737213.2  |
| 11 | 3.78  | 3.78  | 26.85     | IPI:IPI00217236.4  |
| 12 | 3.41  | 3.41  | 19.18     | IPI:IPI00032293.1  |
| 13 | 3.01  | 3.01  | 2.568     | IPI:IPI00019359.4  |
| 14 | 2.66  | 2.66  | 2.055     | IPI:IPI00009865.4  |
| 15 | 2.58  | 2.58  | 6.9229998 | IPI:IPI00221091.9  |
| 15 | 0     | 2     | 2.32      | IPI:IPI00744832.3  |

|    |      |      |           |                   |
|----|------|------|-----------|-------------------|
| 16 | 2.32 | 2.32 | 10.56     | IPI:IPI00410714.5 |
| 17 | 2.26 | 2.26 | 7.965     | IPI:IPI00909530.1 |
| 17 | 0    | 2.26 | 6.6179998 | IPI:IPI00465070.7 |
| 17 | 0    | 2.26 | 6.6179998 | IPI:IPI00219038.9 |
| 17 | 0    | 2.26 | 6.6179998 | IPI:IPI00216402.3 |
| 17 | 0    | 2.26 | 6.6179998 | IPI:IPI00171611.7 |
| 17 | 0    | 2.22 | 7.3169999 | IPI:IPI00477080.1 |
| 17 | 0    | 2.21 | 6.6670001 | IPI:IPI00419884.3 |
| 17 | 0    | 2.19 | 6.6179998 | IPI:IPI00455457.4 |
| 17 | 0    | 2.17 | 7.965     | IPI:IPI00793280.1 |
| 17 | 0    | 2.05 | 8.4109999 | IPI:IPI00942498.1 |
| 17 | 0    | 2    | 6.3830003 | IPI:IPI00886860.2 |
| 17 | 0    | 2    | 8.7379999 | IPI:IPI00792719.1 |
| 18 | 2.06 | 2.06 | 5.714     | IPI:IPI00879750.1 |
| 18 | 0    | 2.06 | 8.3329998 | IPI:IPI00878876.1 |
| 18 | 0    | 2.06 | 7.9369999 | IPI:IPI00017964.1 |
| 19 | 2.01 | 2.01 | 3.6520001 | IPI:IPI00930226.1 |
| 19 | 0    | 2.01 | 3.4669999 | IPI:IPI00894498.1 |
| 19 | 0    | 2.01 | 3.7039999 | IPI:IPI00894365.2 |
| 19 | 0    | 2.01 | 3.4669999 | IPI:IPI00021440.1 |
| 19 | 0    | 2.01 | 3.4669999 | IPI:IPI00021439.1 |
| 19 | 0    | 2    | 1.407     | IPI:IPI00930066.1 |
| 19 | 0    | 2    | 1.407     | IPI:IPI00888712.2 |
| 19 | 0    | 2    | 1.209     | IPI:IPI00479743.3 |
| 19 | 0    | 2    | 1.366     | IPI:IPI00935352.1 |
| 19 | 0    | 2    | 1.407     | IPI:IPI00887316.2 |
| 19 | 0    | 2    | 1.209     | IPI:IPI00740545.1 |
| 19 | 0    | 2    | 1.209     | IPI:IPI00739539.6 |
| 19 | 0    | 2    | 1.252     | IPI:IPI00738655.2 |
| 19 | 0    | 2    | 27.079999 | IPI:IPI00893501.1 |
| 20 | 2    | 2    | 10.92     | IPI:IPI00302850.4 |
| 20 | 0    | 2    | 10.92     | IPI:IPI00943813.1 |
| 21 | 2    | 2    | 6.6119999 | IPI:IPI00947310.1 |
| 21 | 0    | 2    | 5.926     | IPI:IPI00946606.1 |
| 21 | 0    | 2    | 5.0310001 | IPI:IPI00922415.1 |
| 21 | 0    | 2    | 5.4049999 | IPI:IPI00029744.1 |
| 22 | 2    | 2    | 8.5110001 | IPI:IPI00909492.1 |
| 22 | 0    | 2    | 8.1629999 | IPI:IPI00798011.1 |
| 22 | 0    | 2    | 8.8890001 | IPI:IPI00793687.1 |
| 22 | 0    | 2    | 13.19     | IPI:IPI00790142.1 |
| 22 | 0    | 2    | 16.9      | IPI:IPI00745893.2 |
| 22 | 0    | 2    | 12.630001 | IPI:IPI00434968.2 |
| 22 | 0    | 2    | 12.630001 | IPI:IPI00299149.1 |
| 22 | 0    | 2    | 11.65     | IPI:IPI00299147.8 |
| 22 | 0    | 2    | 12.630001 | IPI:IPI00140827.3 |
| 23 | 1.72 | 1.72 | 10.89     | IPI:IPI00917605.1 |
| 23 | 0    | 1.72 | 10.48     | IPI:IPI00465315.6 |
| 24 | 1.7  | 1.7  | 7.801     | IPI:IPI00305477.5 |
| 24 | 0    | 1.7  | 7.801     | IPI:IPI00032294.1 |



|    |      |      |           |                   |
|----|------|------|-----------|-------------------|
| 25 | 1.56 | 1.56 | 10.43     | IPI:IPI00008529.1 |
| 26 | 1.52 | 1.52 | 8.4509999 | IPI:IPI00794659.1 |
| 26 | 0    | 1.52 | 18.75     | IPI:IPI00794061.1 |
| 26 | 0    | 1.52 | 10.08     | IPI:IPI00012493.1 |
| 26 | 0    | 1.52 | 31.580001 | IPI:IPI00795919.1 |
| 27 | 1.47 | 1.47 | 7.6269999 | IPI:IPI00017963.1 |
| 27 | 0    | 1.4  | 8.3329998 | IPI:IPI00930678.1 |
| 28 | 1.4  | 1.4  | 8.4509999 | IPI:IPI00002535.2 |

S29

| N | Unused | Total | %Cov(95)  | Accession         |
|---|--------|-------|-----------|-------------------|
| 1 | 11.47  | 11.47 | 44.659999 | IPI:IPI00453473.6 |
| 2 | 5.88   | 5.88  | 3.7269998 | IPI:IPI00220327.4 |
| 3 | 4      | 4     | 8.1629999 | IPI:IPI00549248.4 |
| 3 | 0      | 4     | 9.2660002 | IPI:IPI00658013.1 |
| 3 | 0      | 2     | 8.0650002 | IPI:IPI00956486.1 |
| 3 | 0      | 2     | 6.8810001 | IPI:IPI00604504.1 |
| 3 | 0      | 2     | 3.396     | IPI:IPI00220740.1 |
| 4 | 3.73   | 3.73  | 21.780001 | IPI:IPI00917605.1 |
| 4 | 0      | 3.73  | 20.95     | IPI:IPI00465315.6 |
| 4 | 0      | 3.31  | 20.95     | IPI:IPI00176698.3 |
| 5 | 2.92   | 2.92  | 0         | IPI:IPI00552873.2 |
| 5 | 0      | 2.92  | 0         | IPI:IPI00339274.5 |
| 5 | 0      | 2.92  | 0         | IPI:IPI00291764.5 |
| 5 | 0      | 2.92  | 0         | IPI:IPI00255316.5 |
| 5 | 0      | 2.92  | 0         | IPI:IPI00220855.3 |
| 5 | 0      | 2.92  | 0         | IPI:IPI00216457.7 |
| 5 | 0      | 2.92  | 0         | IPI:IPI00102165.4 |
| 5 | 0      | 2.92  | 0         | IPI:IPI00081836.3 |
| 5 | 0      | 1.96  | 0         | IPI:IPI00219037.5 |
| 5 | 0      | 1.96  | 0         | IPI:IPI00216456.5 |
| 5 | 0      | 1.96  | 0         | IPI:IPI00045109.3 |
| 5 | 0      | 1.96  | 0         | IPI:IPI00031562.3 |
| 5 | 0      | 1.96  | 0         | IPI:IPI00026272.2 |
| 5 | 0      | 1.92  | 0         | IPI:IPI00930144.1 |
| 5 | 0      | 1.77  | 0         | IPI:IPI00926183.1 |
| 5 | 0      | 1.77  | 0         | IPI:IPI00913961.2 |
| 5 | 0      | 1.77  | 0         | IPI:IPI00249267.2 |
| 5 | 0      | 1.77  | 0         | IPI:IPI00218448.4 |
| 5 | 0      | 1.77  | 0         | IPI:IPI00141938.4 |
| 5 | 0      | 1.77  | 0         | IPI:IPI00018278.3 |
| 6 | 2.82   | 2.82  | 11.64     | IPI:IPI00032293.1 |
| 7 | 2.8    | 2.8   | 14.29     | IPI:IPI00239077.5 |
| 7 | 0      | 1.4   | 11.54     | IPI:IPI00968242.1 |
| 7 | 0      | 1.4   | 11.54     | IPI:IPI00967744.1 |
| 7 | 0      | 1.4   | 8.7379999 | IPI:IPI00967474.1 |
| 7 | 0      | 1.4   | 13.850001 | IPI:IPI00966135.1 |
| 7 | 0      | 1.4   | 7.1429998 | IPI:IPI00039639.8 |
| 8 | 2.34   | 2.34  | 2.568     | IPI:IPI00019359.4 |

|    |      |      |           |                   |
|----|------|------|-----------|-------------------|
| 9  | 2.31 | 2.31 | 6.6270001 | IPI:IPI00794461.1 |
| 9  | 0    | 2.31 | 8.7300003 | IPI:IPI00930570.1 |
| 9  | 0    | 2.31 | 8.2089998 | IPI:IPI00930174.1 |
| 9  | 0    | 2.31 | 8.7300003 | IPI:IPI00815755.1 |
| 9  | 0    | 2.31 | 6.6270001 | IPI:IPI00646240.3 |
| 9  | 0    | 2.31 | 8.7300003 | IPI:IPI00554798.2 |
| 9  | 0    | 2.31 | 8.7300003 | IPI:IPI00477495.3 |
| 9  | 0    | 2.31 | 8.7300003 | IPI:IPI00419833.9 |
| 9  | 0    | 2.31 | 8.7300003 | IPI:IPI00329665.8 |
| 9  | 0    | 2.31 | 8.7300003 | IPI:IPI00303133.8 |
| 9  | 0    | 2.31 | 8.7300003 | IPI:IPI00152906.6 |
| 9  | 0    | 2.31 | 8.7300003 | IPI:IPI00020101.9 |
| 9  | 0    | 2.31 | 8.7300003 | IPI:IPI00018534.4 |
| 9  | 0    | 2.11 | 8.7300003 | IPI:IPI00515061.3 |
| 9  | 0    | 2.11 | 8.6609997 | IPI:IPI00465363.3 |
| 9  | 0    | 2.11 | 8.7300003 | IPI:IPI00220403.3 |
| 9  | 0    | 2.11 | 8.7300003 | IPI:IPI00152785.3 |
| 9  | 0    | 2.11 | 8.7300003 | IPI:IPI00003935.6 |
| 9  | 0    | 2.09 | 8.7300003 | IPI:IPI00166293.5 |
| 10 | 2.04 | 2.07 | 2.397     | IPI:IPI00009865.4 |
| 11 | 2    | 2    | 8.2280003 | IPI:IPI00794894.1 |
| 11 | 0    | 2    | 8.2280003 | IPI:IPI00793523.1 |
| 11 | 0    | 2    | 6.701     | IPI:IPI00789159.1 |
| 11 | 0    | 2    | 8.3329998 | IPI:IPI00176755.4 |
| 11 | 0    | 2    | 8.3329998 | IPI:IPI00021266.1 |
| 11 | 0    | 2    | 8.3329998 | IPI:IPI00923578.1 |
| 12 | 1.53 | 1.53 | 12.24     | IPI:IPI00021828.1 |

S30

| N | Unused | Total | %Cov(95)  | Accession          |
|---|--------|-------|-----------|--------------------|
| 1 | 4.89   | 4.89  | 21.359999 | IPI:IPI00453473.6  |
| 2 | 3.52   | 3.52  | 17.389999 | IPI:IPI00293276.10 |
| 3 | 2.97   | 2.97  | 8.4030002 | IPI:IPI00004656.3  |
| 3 | 0      | 2.97  | 8.1969999 | IPI:IPI00796379.2  |
| 4 | 2.69   | 2.69  | 12.38     | IPI:IPI00216298.6  |
| 4 | 0      | 2.65  | 15.29     | IPI:IPI00552768.1  |
| 5 | 2.47   | 2.47  | 15.48     | IPI:IPI00879531.1  |
| 5 | 0      | 2.33  | 19.7      | IPI:IPI00514399.1  |
| 6 | 2.35   | 2.35  | 10.58     | IPI:IPI00029631.1  |
| 7 | 2      | 2     | 5.8820002 | IPI:IPI00217466.3  |
| 7 | 0      | 2     | 6.103     | IPI:IPI00217465.5  |
| 7 | 0      | 2     | 5.9360001 | IPI:IPI00217467.3  |
| 8 | 1.52   | 1.52  | 1.398     | IPI:IPI00220327.4  |
| 9 | 1.42   | 1.42  | 0         | IPI:IPI00878984.1  |
| 9 | 0      | 1.42  | 0         | IPI:IPI00293867.7  |
| 9 | 0      | 1.42  | 0         | IPI:IPI00913936.1  |
| 9 | 0      | 1.42  | 0         | IPI:IPI00909853.1  |
| 9 | 0      | 1.42  | 0         | IPI:IPI00894562.1  |
| 9 | 0      | 1.42  | 0         | IPI:IPI00894440.1  |

|    |      |      |   |                   |
|----|------|------|---|-------------------|
| 9  | 0    | 1.42 | 0 | IPI:IPI00787049.1 |
| 9  | 0    | 1.42 | 0 | IPI:IPI00472043.3 |
| 10 | 1.35 | 1.35 | 0 | IPI:IPI00873080.1 |

S31

| N | Unused | Total | %Cov(95)  | Accession         |
|---|--------|-------|-----------|-------------------|
| 1 | 18.44  | 18.44 | 9.0060003 | IPI:IPI00220327.4 |
| 2 | 10.67  | 15.05 | 11.16     | IPI:IPI00021304.1 |
| 3 | 10.65  | 10.65 | 10.79     | IPI:IPI00009865.4 |
| 4 | 8.56   | 8.59  | 7.8649998 | IPI:IPI00019359.4 |
| 5 | 4.27   | 4.27  | 21.359999 | IPI:IPI00453473.6 |
| 6 | 2.33   | 2.33  | 9.804     | IPI:IPI00220362.5 |
| 6 | 0      | 2.26  | 21.28     | IPI:IPI00916345.1 |
| 6 | 0      | 2.15  | 9.9009998 | IPI:IPI00916763.1 |
| 7 | 1.52   | 1.52  | 9.0910003 | IPI:IPI00847793.1 |
| 7 | 0      | 1.52  | 10        | IPI:IPI00027547.2 |
| 8 | 1.52   | 1.52  | 23.08     | IPI:IPI00647942.1 |
| 8 | 0      | 1.52  | 13.04     | IPI:IPI00068430.1 |
| 8 | 0      | 1.52  | 13.04     | IPI:IPI00029266.1 |
| 9 | 1.35   | 1.35  | 0         | IPI:IPI00873080.1 |

S32

| N | Unused | Total | %Cov(95)  | Accession         |
|---|--------|-------|-----------|-------------------|
| 1 | 18.43  | 18.43 | 10.25     | IPI:IPI00220327.4 |
| 2 | 12.07  | 12.07 | 9.7599998 | IPI:IPI00009865.4 |
| 3 | 9.35   | 14.85 | 11.47     | IPI:IPI00021304.1 |
| 4 | 3.52   | 3.64  | 4.0130001 | IPI:IPI00019359.4 |
| 5 | 2.98   | 2.98  | 12.26     | IPI:IPI00798155.4 |
| 5 | 0      | 2.98  | 15.180001 | IPI:IPI00798127.1 |
| 5 | 0      | 2.98  | 7.784     | IPI:IPI00797400.1 |
| 5 | 0      | 2.98  | 16.56     | IPI:IPI00796600.1 |
| 5 | 0      | 2.98  | 16.99     | IPI:IPI00796007.2 |
| 5 | 0      | 2.98  | 14.049999 | IPI:IPI00795527.1 |
| 5 | 0      | 2.98  | 13.76     | IPI:IPI00794925.1 |
| 5 | 0      | 2.98  | 8.3329998 | IPI:IPI00794211.1 |
| 5 | 0      | 2.98  | 15.29     | IPI:IPI00793810.1 |
| 5 | 0      | 2.98  | 17.05     | IPI:IPI00793729.1 |
| 5 | 0      | 2.98  | 11.93     | IPI:IPI00793330.1 |
| 5 | 0      | 2.98  | 14.81     | IPI:IPI00792712.1 |
| 5 | 0      | 2.98  | 17.89     | IPI:IPI00790633.1 |
| 5 | 0      | 2.98  | 18.179999 | IPI:IPI00789823.1 |
| 5 | 0      | 2.98  | 14.72     | IPI:IPI00789107.1 |
| 5 | 0      | 2.98  | 16.99     | IPI:IPI00784990.2 |
| 5 | 0      | 2.98  | 17.030001 | IPI:IPI00719280.2 |
| 5 | 0      | 2.98  | 10.16     | IPI:IPI00456429.3 |
| 5 | 0      | 2.98  | 8.3329998 | IPI:IPI00179330.6 |
| 5 | 0      | 2.64  | 11.35     | IPI:IPI00794205.1 |
| 5 | 0      | 2.64  | 5.804     | IPI:IPI00418813.2 |
| 5 | 0      | 2.54  | 15.85     | IPI:IPI00792139.1 |

|   |   |      |           |                   |
|---|---|------|-----------|-------------------|
| 5 | 0 | 2.54 | 13.680001 | IPI:IPI00654754.1 |
| 5 | 0 | 2.19 | 16.670001 | IPI:IPI00879555.1 |
| 5 | 0 | 2.19 | 3.892     | IPI:IPI00937730.1 |
| 5 | 0 | 2.19 | 3.892     | IPI:IPI00936175.1 |

| Name                                                       | Species | Peptides(95) |
|------------------------------------------------------------|---------|--------------|
| Gene_Symbol=TF Serotransferrin                             | 9606    | 28           |
| Gene_Symbol=KRT2 Keratin, type II cytoskeletal 2 epidermal | 9606    | 4            |
| Gene_Symbol=KRT1 Keratin, type II cytoskeletal 1           | 9606    | 3            |
| Gene_Symbol=KRT9 Keratin, type I cytoskeletal 9            | 9606    | 2            |
| Gene_Symbol=KRT10 Keratin, type I cytoskeletal 10          | 9606    | 1            |

| Name                                             | Species | Peptides(95) |
|--------------------------------------------------|---------|--------------|
| Gene_Symbol=TF Serotransferrin                   | 9606    | 157          |
| Gene_Symbol=KRT1 Keratin, type II cytoskeletal 1 | 9606    | 1            |

| Name                                                                                | Species | Peptides(95) |
|-------------------------------------------------------------------------------------|---------|--------------|
| Gene_Symbol=TF Serotransferrin                                                      | 9606    | 29           |
| Gene_Symbol=KRT1 Keratin, type II cytoskeletal 1                                    | 9606    | 16           |
| Gene_Symbol=KRT10 Keratin, type I cytoskeletal 10                                   | 9606    | 16           |
| Gene_Symbol=HPX Hemopexin                                                           | 9606    | 6            |
| Gene_Symbol=ALB Putative uncharacterized protein ALB                                | 9606    | 7            |
| Gene_Symbol=ALB cDNA FLJ50830, highly similar to Serum albumin                      | 9606    | 7            |
| Gene_Symbol=ALB 69 kDa protein                                                      | 9606    | 7            |
| Gene_Symbol=ALB Isoform 1 of Serum albumin                                          | 9606    | 7            |
| Gene_Symbol=ALB Putative uncharacterized protein ALB                                | 9606    | 7            |
| Gene_Symbol=ALB Putative uncharacterized protein ALB                                | 9606    | 7            |
| Gene_Symbol=ALB Isoform 2 of Serum albumin                                          | 9606    | 7            |
| Gene_Symbol=KRT2 Keratin, type II cytoskeletal 2 epidermal                          | 9606    | 7            |
| Gene_Symbol=KRT9 Keratin, type I cytoskeletal 9                                     | 9606    | 3            |
| Gene_Symbol=KRT6B Keratin, type II cytoskeletal 6B                                  | 9606    | 6            |
| Gene_Symbol=KRT5 Keratin, type II cytoskeletal 5                                    | 9606    | 4            |
| Gene_Symbol=KRT6C 58 kDa protein                                                    | 9606    | 5            |
| Gene_Symbol=KRT6A 58 kDa protein                                                    | 9606    | 5            |
| Gene_Symbol=KRT6A cDNA FLJ53910, highly similar to Keratin, type II cytoskeletal 6A | 9606    | 5            |
| Gene_Symbol=KRT6A Keratin, type II cytoskeletal 6A                                  | 9606    | 5            |
| Gene_Symbol=KRT6C Keratin, type II cytoskeletal 6C                                  | 9606    | 5            |
| Gene_Symbol=KRT6C cDNA, FLJ93744, highly similar to Homo sapiens keratin 6E         | 9606    | 5            |
| Gene_Symbol=KRT5 cDNA FLJ54081, highly similar to Keratin, type II cytoskeletal 5   | 9606    | 4            |
| Gene_Symbol=- cDNA FLJ60647, highly similar to Keratin, type II cytoskeletal 6B     | 9606    | 3            |

| Name                                                       | Species | Peptides(95) |
|------------------------------------------------------------|---------|--------------|
| Gene_Symbol=TF Serotransferrin                             | 9606    | 18           |
| Gene_Symbol=KRT1 Keratin, type II cytoskeletal 1           | 9606    | 5            |
| Gene_Symbol=KRT9 Keratin, type I cytoskeletal 9            | 9606    | 4            |
| Gene_Symbol=KRT10 Keratin, type I cytoskeletal 10          | 9606    | 4            |
| Gene_Symbol=KRT2 Keratin, type II cytoskeletal 2 epidermal | 9606    | 2            |
| Gene_Symbol=ALB 69 kDa protein                             | 9606    | 1            |
| Gene_Symbol=ALB Isoform 1 of Serum albumin                 | 9606    | 1            |
| Gene_Symbol=ALB Putative uncharacterized protein ALB       | 9606    | 1            |

|                                                                                 |      |   |
|---------------------------------------------------------------------------------|------|---|
| Gene_Symbol=ALB ALB protein                                                     | 9606 | 1 |
| Gene_Symbol=ALB cDNA FLJ50830, highly similar to Serum albumin                  | 9606 | 1 |
| Gene_Symbol=ALB Putative uncharacterized protein ALB                            | 9606 | 1 |
| Gene_Symbol=ALB Putative uncharacterized protein ALB                            | 9606 | 1 |
| Gene_Symbol=ALB Isoform 2 of Serum albumin                                      | 9606 | 1 |
| Gene_Symbol=ALB Protein                                                         | 9606 | 1 |
| Gene_Symbol=ALB 52 kDa protein                                                  | 9606 | 1 |
| Gene_Symbol=HPX Hemopexin                                                       | 9606 | 1 |
| Gene_Symbol=- cDNA FLJ56652, highly similar to Hemopexin                        | 9606 | 1 |
| Gene_Symbol=KRT14 Keratin, type I cytoskeletal 14                               | 9606 | 1 |
| Gene_Symbol=KRT16 Keratin, type I cytoskeletal 16                               | 9606 | 1 |
| Gene_Symbol=KRT14 27 kDa protein                                                | 9606 | 1 |
| Gene_Symbol=KRT13 42 kDa protein                                                | 9606 | 1 |
| Gene_Symbol=KRT17 Keratin, type I cytoskeletal 17                               | 9606 | 1 |
| Gene_Symbol=KRT13 31 kDa protein                                                | 9606 | 1 |
| Gene_Symbol=KRT15 49 kDa protein                                                | 9606 | 1 |
| Gene_Symbol=KRT15 Keratin, type I cytoskeletal 15                               | 9606 | 1 |
| Gene_Symbol=KRT19 Putative uncharacterized protein KRT19                        | 9606 | 1 |
| Gene_Symbol=KRT19 Keratin, type I cytoskeletal 19                               | 9606 | 1 |
| Gene_Symbol=KRT16 cDNA FLJ56791, highly similar to Keratin, type I cytoskeletal | 9606 | 1 |
| Gene_Symbol=- 25 kDa protein                                                    | 9606 | 1 |
| Gene_Symbol=- Putative uncharacterized protein ENSP00000319235                  | 9606 | 1 |
| Gene_Symbol=- 48 kDa protein                                                    | 9606 | 1 |
| Gene_Symbol=- Putative uncharacterized protein ENSP00000382160                  | 9606 | 1 |
| Gene_Symbol=JUP cDNA FLJ60424, highly similar to Junction plakoglobin           | 9606 | 1 |
| Gene_Symbol=KRT15 21 kDa protein                                                | 9606 | 1 |
| Gene_Symbol=KRT15 Putative uncharacterized protein KRT15                        | 9606 | 1 |
| Gene_Symbol=KRT13 30 kDa protein                                                | 9606 | 1 |
| Gene_Symbol=KRT15 Putative uncharacterized protein KRT15                        | 9606 | 1 |
| Gene_Symbol=KRT19 25 kDa protein                                                | 9606 | 1 |
| Gene_Symbol=LOC100294459;IGHV4-31;IGHG1;LOC100290146 Putative unchara           | 9606 | 1 |
| Gene_Symbol=LOC100294459;IGHV4-31;IGHG1;LOC100290146 32 kDa protein             | 9606 | 1 |
| Gene_Symbol=LOC100294459;IGHV4-31;IGHG1;LOC100290146 cDNA FLJ78387              | 9606 | 1 |
| Gene_Symbol=LOC100294459;IGHV4-31;IGHG1;LOC100290146 Putative unchara           | 9606 | 1 |
| Gene_Symbol=LOC100294459;IGHV4-31;IGHG1;LOC100290146 IGH@ protein               | 9606 | 1 |
| Gene_Symbol=LOC100294459;IGHV4-31;IGHG1;LOC100290146 Putative unchara           | 9606 | 1 |
| Gene_Symbol=LOC100294459;IGHV4-31;IGHG1;LOC100290146 Anti-RhD monocl            | 9606 | 1 |
| Gene_Symbol=LOC100294459;IGHV4-31;IGHG1;LOC100290146 44 kDa protein             | 9606 | 1 |
| Gene_Symbol=LOC100294459;IGHV4-31;IGHG1;LOC100290146 Putative unchara           | 9606 | 1 |
| Gene_Symbol=LOC100294459;IGHV4-31;IGHG1;LOC100290146 Putative unchara           | 9606 | 1 |
| Gene_Symbol=LOC100294459;IGHV4-31;IGHG1;LOC100290146 Putative unchara           | 9606 | 1 |
| Gene_Symbol=LOC100294459;IGHV4-31;IGHG1;LOC100290146 Putative unchara           | 9606 | 1 |

| Name                                                                     | Species | Peptides(95 |
|--------------------------------------------------------------------------|---------|-------------|
| Gene_Symbol=TF Serotransferrin                                           | 9606    | 4           |
| Gene_Symbol=TPM1 cDNA FLJ16459 fis, clone BRCAN2002473, moderately simil | 9606    | 3           |
| Gene_Symbol=TPM1 tropomyosin alpha-1 chain isoform 2                     | 9606    | 3           |

|                                                                             |      |   |
|-----------------------------------------------------------------------------|------|---|
| Gene_Symbol=TPM1 37 kDa protein                                             | 9606 | 3 |
| Gene_Symbol=TPM1 tropomyosin alpha-1 chain isoform 3                        | 9606 | 3 |
| Gene_Symbol=TPM1 Isoform 3 of Tropomyosin alpha-1 chain                     | 9606 | 3 |
| Gene_Symbol=TPM1 Isoform 6 of Tropomyosin alpha-1 chain                     | 9606 | 3 |
| Gene_Symbol=TPM1 Tropomyosin 1 (Alpha), isoform CRA_o                       | 9606 | 3 |
| Gene_Symbol=TPM1 Isoform 1 of Tropomyosin alpha-1 chain                     | 9606 | 3 |
| Gene_Symbol=TPM1 Isoform 4 of Tropomyosin alpha-1 chain                     | 9606 | 3 |
| Gene_Symbol=TPM1 cDNA FLJ54760, highly similar to Rattus norvegicus tropomy | 9606 | 2 |
| Gene_Symbol=TPM1 Isoform 2 of Tropomyosin alpha-1 chain                     | 9606 | 2 |
| Gene_Symbol=TPM1 tropomyosin alpha-1 chain isoform 7                        | 9606 | 2 |
| Gene_Symbol=TPM1 Tropomyosin isoform                                        | 9606 | 2 |
| Gene_Symbol=ALB 69 kDa protein                                              | 9606 | 1 |
| Gene_Symbol=ALB Isoform 1 of Serum albumin                                  | 9606 | 1 |
| Gene_Symbol=ALB Putative uncharacterized protein ALB                        | 9606 | 1 |
| Gene_Symbol=ALB ALB protein                                                 | 9606 | 1 |
| Gene_Symbol=ALB cDNA FLJ50830, highly similar to Serum albumin              | 9606 | 1 |
| Gene_Symbol=ALB Putative uncharacterized protein ALB                        | 9606 | 1 |
| Gene_Symbol=ALB Putative uncharacterized protein ALB                        | 9606 | 1 |
| Gene_Symbol=ALB Isoform 2 of Serum albumin                                  | 9606 | 1 |
| Gene_Symbol=ALB Protein                                                     | 9606 | 1 |
| Gene_Symbol=ALB 52 kDa protein                                              | 9606 | 1 |
| Gene_Symbol=KRT1 Keratin, type II cytoskeletal 1                            | 9606 | 1 |
| Gene_Symbol=KRT9 Keratin, type I cytoskeletal 9                             | 9606 | 1 |

| Name                                                           | Species | Peptides(95) |
|----------------------------------------------------------------|---------|--------------|
| Gene_Symbol=KRT2 Keratin, type II cytoskeletal 2 epidermal     | 9606    | 6            |
| Gene_Symbol=TF Serotransferrin                                 | 9606    | 6            |
| Gene_Symbol=KRT10 Keratin, type I cytoskeletal 10              | 9606    | 4            |
| Gene_Symbol=KRT1 Keratin, type II cytoskeletal 1               | 9606    | 4            |
| Gene_Symbol=KRT9 Keratin, type I cytoskeletal 9                | 9606    | 3            |
| Gene_Symbol=ALB 69 kDa protein                                 | 9606    | 3            |
| Gene_Symbol=ALB Isoform 1 of Serum albumin                     | 9606    | 3            |
| Gene_Symbol=ALB Putative uncharacterized protein ALB           | 9606    | 3            |
| Gene_Symbol=ALB Protein                                        | 9606    | 3            |
| Gene_Symbol=ALB 52 kDa protein                                 | 9606    | 3            |
| Gene_Symbol=ALB cDNA FLJ50830, highly similar to Serum albumin | 9606    | 3            |
| Gene_Symbol=ALB Putative uncharacterized protein ALB           | 9606    | 3            |
| Gene_Symbol=ALB ALB protein                                    | 9606    | 3            |
| Gene_Symbol=ALB Putative uncharacterized protein ALB           | 9606    | 3            |
| Gene_Symbol=ALB Isoform 2 of Serum albumin                     | 9606    | 3            |
| Gene_Symbol=ANXA5 29 kDa protein                               | 9606    | 0            |
| Gene_Symbol=ANXA5 36 kDa protein                               | 9606    | 0            |
| Gene_Symbol=ANXA5 Annexin A5                                   | 9606    | 0            |

| Name                                              | Species | Peptides(95) |
|---------------------------------------------------|---------|--------------|
| Gene_Symbol=KRT1 Keratin, type II cytoskeletal 1  | 9606    | 9            |
| Gene_Symbol=KRT10 Keratin, type I cytoskeletal 10 | 9606    | 5            |

|                                                                           |      |   |
|---------------------------------------------------------------------------|------|---|
| Gene_Symbol=TF Serotransferrin                                            | 9606 | 4 |
| Gene_Symbol=KRT2 Keratin, type II cytoskeletal 2 epidermal                | 9606 | 7 |
| Gene_Symbol=IGLC3 hypothetical protein XP_002348153                       | 9606 | 1 |
| Gene_Symbol=IGLV3-19 IGL@ protein                                         | 9606 | 1 |
| Gene_Symbol=IGLV1-44 Putative uncharacterized protein                     | 9606 | 1 |
| Gene_Symbol=IGLV2-8 IGL@ protein                                          | 9606 | 1 |
| Gene_Symbol=LOC100290557 IGL@ protein                                     | 9606 | 1 |
| Gene_Symbol=IGLV2-11 IGL@ protein                                         | 9606 | 1 |
| Gene_Symbol=IGLV1-40 V1-13 protein (Fragment)                             | 9606 | 1 |
| Gene_Symbol=- Amyloid lambda 6 light chain variable region NEG (Fragment) | 9606 | 1 |
| Gene_Symbol=- Ig lambda chain V-II region BO                              | 9606 | 1 |
| Gene_Symbol=IGLV1-47 V1-17 protein                                        | 9606 | 1 |
| Gene_Symbol=IGLV1-44 Anti-streptococcal/anti-myosin immunoglobulin lambda | 9606 | 1 |
| Gene_Symbol=IGLV1-44 V1-16 protein (Fragment)                             | 9606 | 1 |
| Gene_Symbol=IGLV6-57 Amyloid lambda 6 light chain variable region PIP     | 9606 | 1 |
| Gene_Symbol=- Anti-folate binding protein (Fragment)                      | 9606 | 1 |
| Gene_Symbol=- UGa8L (Fragment)                                            | 9606 | 1 |
| Gene_Symbol=- Light chain Fab (Fragment)                                  | 9606 | 1 |
| Gene_Symbol=IGLV2-18 V1-5 protein                                         | 9606 | 1 |
| Gene_Symbol=- Amyloid lambda 6 light chain variable region SAR (Fragment) | 9606 | 1 |
| Gene_Symbol=- Ig lambda chain V-I region MEM                              | 9606 | 1 |
| Gene_Symbol=- Ig lambda chain V-VI region SUT                             | 9606 | 1 |
| Gene_Symbol=- Ig lambda chain V-I region WAH                              | 9606 | 1 |
| Gene_Symbol=- Immunoglobulin light chain variable region (Fragment)       | 9606 | 1 |
| Gene_Symbol=- Ig lambda chain V-VI region AR                              | 9606 | 1 |
| Gene_Symbol=- Ig lambda chain V-II region WIN                             | 9606 | 1 |
| Gene_Symbol=- Ig lambda chain V-II region MGC                             | 9606 | 1 |
| Gene_Symbol=- Ig lambda chain V-II region TRO                             | 9606 | 1 |
| Gene_Symbol=- Ig lambda chain V-I region HA                               | 9606 | 1 |
| Gene_Symbol=- Ig lambda chain V-II region BUR                             | 9606 | 1 |
| Gene_Symbol=ALB 69 kDa protein                                            | 9606 | 1 |
| Gene_Symbol=ALB Isoform 1 of Serum albumin                                | 9606 | 1 |
| Gene_Symbol=ALB Putative uncharacterized protein ALB                      | 9606 | 1 |
| Gene_Symbol=ALB Protein                                                   | 9606 | 1 |
| Gene_Symbol=ALB 52 kDa protein                                            | 9606 | 1 |
| Gene_Symbol=ALB cDNA FLJ50830, highly similar to Serum albumin            | 9606 | 1 |
| Gene_Symbol=ALB Putative uncharacterized protein ALB                      | 9606 | 1 |
| Gene_Symbol=ALB Putative uncharacterized protein ALB                      | 9606 | 1 |
| Gene_Symbol=ALB Isoform 2 of Serum albumin                                | 9606 | 1 |
| Gene_Symbol=ALB ALB protein                                               | 9606 | 1 |
| Gene_Symbol=KRT9 Keratin, type I cytoskeletal 9                           | 9606 | 1 |

| Name                                              | Species | Peptides(95) |
|---------------------------------------------------|---------|--------------|
| Gene_Symbol=KRT1 Keratin, type II cytoskeletal 1  | 9606    | 6            |
| Gene_Symbol=KRT9 Keratin, type I cytoskeletal 9   | 9606    | 4            |
| Gene_Symbol=TF Serotransferrin                    | 9606    | 3            |
| Gene_Symbol=KRT10 Keratin, type I cytoskeletal 10 | 9606    | 0            |



| Name                                                                           | Species | Peptides(95) |
|--------------------------------------------------------------------------------|---------|--------------|
| Gene_Symbol=FLNB Isoform 2 of Filamin-B                                        | 9606    | 32           |
| Gene_Symbol=FLNB filamin-B isoform 1                                           | 9606    | 32           |
| Gene_Symbol=FLNB filamin-B isoform 3                                           | 9606    | 32           |
| Gene_Symbol=FLNB Isoform 1 of Filamin-B                                        | 9606    | 32           |
| Gene_Symbol=FLNB 256 kDa protein                                               | 9606    | 32           |
| Gene_Symbol=FLNB Isoform 7 of Filamin-B                                        | 9606    | 32           |
| Gene_Symbol=KRT1 Keratin, type II cytoskeletal 1                               | 9606    | 9            |
| Gene_Symbol=PLEC Isoform 1 of Plectin-1                                        | 9606    | 7            |
| Gene_Symbol=PLEC Isoform 9 of Plectin-1                                        | 9606    | 7            |
| Gene_Symbol=PLEC Isoform 3 of Plectin-1                                        | 9606    | 7            |
| Gene_Symbol=PLEC Isoform 8 of Plectin-1                                        | 9606    | 7            |
| Gene_Symbol=PLEC Isoform 4 of Plectin-1                                        | 9606    | 7            |
| Gene_Symbol=PLEC Isoform 6 of Plectin-1                                        | 9606    | 7            |
| Gene_Symbol=PLEC Isoform 5 of Plectin-1                                        | 9606    | 7            |
| Gene_Symbol=PLEC Isoform 7 of Plectin-1                                        | 9606    | 7            |
| Gene_Symbol=PLEC Isoform 2 of Plectin-1                                        | 9606    | 7            |
| Gene_Symbol=FASN Fatty acid synthase                                           | 9606    | 8            |
| Gene_Symbol=TF Serotransferrin                                                 | 9606    | 7            |
| Gene_Symbol=KRT10 Keratin, type I cytoskeletal 10                              | 9606    | 5            |
| Gene_Symbol=KRT9 Keratin, type I cytoskeletal 9                                | 9606    | 3            |
| Gene_Symbol=KRT2 Keratin, type II cytoskeletal 2 epidermal                     | 9606    | 4            |
| Gene_Symbol=FN1 263 kDa protein                                                | 9606    | 2            |
| Gene_Symbol=FN1 Isoform 15 of Fibronectin                                      | 9606    | 2            |
| Gene_Symbol=FN1 fibronectin isoform 2 preproprotein                            | 9606    | 2            |
| Gene_Symbol=FN1 Isoform 11 of Fibronectin                                      | 9606    | 2            |
| Gene_Symbol=FN1 Isoform 7 of Fibronectin                                       | 9606    | 2            |
| Gene_Symbol=FN1 Isoform 6 of Fibronectin                                       | 9606    | 2            |
| Gene_Symbol=FN1 Isoform 5 of Fibronectin                                       | 9606    | 2            |
| Gene_Symbol=FN1 fibronectin isoform 4 preproprotein                            | 9606    | 2            |
| Gene_Symbol=FN1 Isoform 3 of Fibronectin                                       | 9606    | 2            |
| Gene_Symbol=FN1 Isoform 1 of Fibronectin                                       | 9606    | 2            |
| Gene_Symbol=FN1 Isoform 13 of Fibronectin                                      | 9606    | 1            |
| Gene_Symbol=FN1 Isoform 14 of Fibronectin                                      | 9606    | 1            |
| Gene_Symbol=FN1 FN1 protein                                                    | 9606    | 1            |
| Gene_Symbol=FN1 Isoform 9 of Fibronectin                                       | 9606    | 1            |
| Gene_Symbol=FN1 Isoform 8 of Fibronectin                                       | 9606    | 1            |
| Gene_Symbol=TLN1 Talin-1                                                       | 9606    | 3            |
| Gene_Symbol=LOC731751 similar to protein kinase, DNA-activated, catalytic poly | 9606    | 2            |
| Gene_Symbol=PRKDC Isoform 2 of DNA-dependent protein kinase catalytic subur    | 9606    | 2            |
| Gene_Symbol=PRKDC Isoform 1 of DNA-dependent protein kinase catalytic subur    | 9606    | 2            |
| Gene_Symbol=PRPF8 Pre-mRNA-processing-splicing factor 8                        | 9606    | 1            |
| Gene_Symbol=ALB Isoform 1 of Serum albumin                                     | 9606    | 2            |
| Gene_Symbol=ALB cDNA FLJ50830, highly similar to Serum albumin                 | 9606    | 2            |
| Gene_Symbol=ALB Protein                                                        | 9606    | 2            |
| Gene_Symbol=ALB 52 kDa protein                                                 | 9606    | 2            |
| Gene_Symbol=ALB Putative uncharacterized protein ALB                           | 9606    | 2            |
| Gene_Symbol=ALB 69 kDa protein                                                 | 9606    | 2            |

|                                                                |      |   |
|----------------------------------------------------------------|------|---|
| Gene_Symbol=ALB Putative uncharacterized protein ALB           | 9606 | 2 |
| Gene_Symbol=ALB Putative uncharacterized protein ALB           | 9606 | 2 |
| Gene_Symbol=ALB Isoform 2 of Serum albumin                     | 9606 | 2 |
| Gene_Symbol=ALB ALB protein                                    | 9606 | 2 |
| Gene_Symbol=COL18A1 Isoform 1 of Collagen alpha-1(XVIII) chain | 9606 | 1 |
| Gene_Symbol=COL18A1 Isoform 3 of Collagen alpha-1(XVIII) chain | 9606 | 1 |
| Gene_Symbol=COL18A1 Isoform 2 of Collagen alpha-1(XVIII) chain | 9606 | 1 |
| Gene_Symbol=COL18A1 71 kDa protein                             | 9606 | 1 |
| Gene_Symbol=COL18A1 Multi-functional protein MFP               | 9606 | 1 |
| Gene_Symbol=COL18A1 Protein                                    | 9606 | 1 |
| Gene_Symbol=SPTAN1 Putative uncharacterized protein SPTAN1     | 9606 | 1 |
| Gene_Symbol=SPTAN1 Isoform 2 of Spectrin alpha chain, brain    | 9606 | 1 |
| Gene_Symbol=SPTAN1 Isoform 1 of Spectrin alpha chain, brain    | 9606 | 1 |
| Gene_Symbol=SPTAN1 Isoform 3 of Spectrin alpha chain, brain    | 9606 | 1 |
| Gene_Symbol=TNC Isoform 4 of Tenascin                          | 9606 | 0 |
| Gene_Symbol=TNC Isoform 1 of Tenascin                          | 9606 | 0 |
| Gene_Symbol=TNC TNC protein                                    | 9606 | 0 |

| Name                                                                        | Species | Peptides(95) |
|-----------------------------------------------------------------------------|---------|--------------|
| Gene_Symbol=KRT2 Keratin, type II cytoskeletal 2 epidermal                  | 9606    | 16           |
| Gene_Symbol=KRT1 Keratin, type II cytoskeletal 1                            | 9606    | 14           |
| Gene_Symbol=KRT9 Keratin, type I cytoskeletal 9                             | 9606    | 9            |
| Gene_Symbol=KRT10 Keratin, type I cytoskeletal 10                           | 9606    | 6            |
| Gene_Symbol=PRPF8 Pre-mRNA-processing-splicing factor 8                     | 9606    | 5            |
| Gene_Symbol=HRNR Hornerin                                                   | 9606    | 5            |
| Gene_Symbol=SNRNP200 Isoform 1 of U5 small nuclear ribonucleoprotein 200 kD | 9606    | 4            |
| Gene_Symbol=LOC652147 similar to U5 snRNP-specific 200kD protein, partial   | 9606    | 4            |
| Gene_Symbol=TF Serotransferrin                                              | 9606    | 4            |
| Gene_Symbol=MYH9 Isoform 1 of Myosin-9                                      | 9606    | 3            |
| Gene_Symbol=ALB Putative uncharacterized protein ALB                        | 9606    | 1            |
| Gene_Symbol=ALB 69 kDa protein                                              | 9606    | 1            |
| Gene_Symbol=ALB Isoform 1 of Serum albumin                                  | 9606    | 1            |
| Gene_Symbol=ALB Protein                                                     | 9606    | 1            |
| Gene_Symbol=ALB 52 kDa protein                                              | 9606    | 1            |
| Gene_Symbol=ALB cDNA FLJ50830, highly similar to Serum albumin              | 9606    | 1            |
| Gene_Symbol=ALB Putative uncharacterized protein ALB                        | 9606    | 1            |
| Gene_Symbol=ALB Putative uncharacterized protein ALB                        | 9606    | 1            |
| Gene_Symbol=ALB Isoform 2 of Serum albumin                                  | 9606    | 1            |
| Gene_Symbol=ALB ALB protein                                                 | 9606    | 1            |
| Gene_Symbol=NUMA1 NUMA1 variant protein (Fragment)                          | 9606    | 1            |
| Gene_Symbol=NUMA1 Isoform 1 of Nuclear mitotic apparatus protein 1          | 9606    | 1            |
| Gene_Symbol=NUMA1 Isoform 2 of Nuclear mitotic apparatus protein 1          | 9606    | 1            |
| Gene_Symbol=KRT5 Keratin, type II cytoskeletal 5                            | 9606    | 2            |

| Name                                                 | Species | Peptides(95) |
|------------------------------------------------------|---------|--------------|
| Gene_Symbol=TF Serotransferrin                       | 9606    | 37           |
| Gene_Symbol=CLTC Isoform 2 of Clathrin heavy chain 1 | 9606    | 20           |

|                                                                            |      |    |
|----------------------------------------------------------------------------|------|----|
| Gene_Symbol=CLTC Isoform 1 of Clathrin heavy chain 1                       | 9606 | 20 |
| Gene_Symbol=SPTBN1 Isoform 2 of Spectrin beta chain, brain 1               | 9606 | 10 |
| Gene_Symbol=SPTBN1 Isoform Short of Spectrin beta chain, brain 1           | 9606 | 10 |
| Gene_Symbol=SPTBN1 Isoform Long of Spectrin beta chain, brain 1            | 9606 | 10 |
| Gene_Symbol=IQGAP1 Ras GTPase-activating-like protein IQGAP1               | 9606 | 9  |
| Gene_Symbol=NPM1 Isoform 1 of Nucleophosmin                                | 9606 | 5  |
| Gene_Symbol=NPM1 nucleophosmin isoform 3                                   | 9606 | 5  |
| Gene_Symbol=NPM1 Isoform 2 of Nucleophosmin                                | 9606 | 4  |
| Gene_Symbol=FASN Fatty acid synthase                                       | 9606 | 4  |
| Gene_Symbol=NID1 Isoform 2 of Nidogen-1                                    | 9606 | 3  |
| Gene_Symbol=NID1 Isoform 1 of Nidogen-1                                    | 9606 | 3  |
| Gene_Symbol=NID2 Isoform 2 of Nidogen-2                                    | 9606 | 3  |
| Gene_Symbol=NID2 Isoform 1 of Nidogen-2                                    | 9606 | 3  |
| Gene_Symbol=NID2 Putative uncharacterized protein DKFZp686D12108 (Fragme   | 9606 | 3  |
| Gene_Symbol=DIAPH1 141 kDa protein                                         | 9606 | 3  |
| Gene_Symbol=DIAPH1 Isoform 1 of Protein diaphanous homolog 1               | 9606 | 3  |
| Gene_Symbol=DIAPH1 Putative uncharacterized protein DIAPH1                 | 9606 | 3  |
| Gene_Symbol=DIAPH1 protein diaphanous homolog 1 isoform 2                  | 9606 | 3  |
| Gene_Symbol=DIAPH1 Diaphanous homolog 1                                    | 9606 | 3  |
| Gene_Symbol=DIAPH1 Isoform 2 of Protein diaphanous homolog 1               | 9606 | 3  |
| Gene_Symbol=TOP2B 134 kDa protein                                          | 9606 | 3  |
| Gene_Symbol=TOP2B Isoform Beta-1 of DNA topoisomerase 2-beta               | 9606 | 3  |
| Gene_Symbol=TOP2B Isoform Beta-2 of DNA topoisomerase 2-beta               | 9606 | 3  |
| Gene_Symbol=- 138 kDa protein                                              | 9606 | 3  |
| Gene_Symbol=TOP2B Topoisomerase II beta                                    | 9606 | 3  |
| Gene_Symbol=KRT1 Keratin, type II cytoskeletal 1                           | 9606 | 2  |
| Gene_Symbol=FBLN2 Fibulin-2                                                | 9606 | 2  |
| Gene_Symbol=FBLN2 fibulin-2 isoform a precursor                            | 9606 | 2  |
| Gene_Symbol=FBLN2 cDNA FLJ56912, highly similar to Fibulin-2               | 9606 | 2  |
| Gene_Symbol=FBLN2 Putative uncharacterized protein DKFZp586A1519           | 9606 | 2  |
| Gene_Symbol=SMC1A Structural maintenance of chromosomes protein 1A         | 9606 | 2  |
| Gene_Symbol=ALB 69 kDa protein                                             | 9606 | 2  |
| Gene_Symbol=ALB cDNA FLJ50830, highly similar to Serum albumin             | 9606 | 2  |
| Gene_Symbol=ALB Isoform 1 of Serum albumin                                 | 9606 | 2  |
| Gene_Symbol=ALB Putative uncharacterized protein ALB                       | 9606 | 2  |
| Gene_Symbol=ALB Putative uncharacterized protein ALB                       | 9606 | 2  |
| Gene_Symbol=ALB Putative uncharacterized protein ALB                       | 9606 | 2  |
| Gene_Symbol=ALB Isoform 2 of Serum albumin                                 | 9606 | 2  |
| Gene_Symbol=ALB Protein                                                    | 9606 | 2  |
| Gene_Symbol=ALB 52 kDa protein                                             | 9606 | 2  |
| Gene_Symbol=HPX Hemopexin                                                  | 9606 | 2  |
| Gene_Symbol=KRT8 Keratin, type II cytoskeletal 8                           | 9606 | 2  |
| Gene_Symbol=LOC728638 Similar to Keratin, type II cytoskeletal 8           | 9606 | 2  |
| Gene_Symbol=- Keratin-8-like protein 1                                     | 9606 | 2  |
| Gene_Symbol=KRT8 27 kDa protein                                            | 9606 | 2  |
| Gene_Symbol=KRT8 25 kDa protein                                            | 9606 | 1  |
| Gene_Symbol=KRT8 14 kDa protein                                            | 9606 | 1  |
| Gene_Symbol=KRT8 17 kDa protein                                            | 9606 | 1  |
| Gene_Symbol=FLJ46111 cDNA FLJ46111 fis, clone TESTI2034913, moderately sim | 9606 | 1  |

|                                                                                          |      |   |
|------------------------------------------------------------------------------------------|------|---|
| Gene_Symbol=KRT9 Keratin, type I cytoskeletal 9                                          | 9606 | 2 |
| Gene_Symbol=CHL1 Isoform 1 of Neural cell adhesion molecule L1-like protein              | 9606 | 1 |
| Gene_Symbol=CHL1 Isoform 2 of Neural cell adhesion molecule L1-like protein              | 9606 | 1 |
| Gene_Symbol=CHL1 Putative uncharacterized protein CHL1                                   | 9606 | 1 |
| Gene_Symbol=CHL1 Putative uncharacterized protein CHL1                                   | 9606 | 1 |
| Gene_Symbol=CHL1 Putative uncharacterized protein CHL1                                   | 9606 | 1 |
| Gene_Symbol=CHL1 15 kDa protein                                                          | 9606 | 1 |
| Gene_Symbol=TOP2A DNA topoisomerase 2                                                    | 9606 | 2 |
| Gene_Symbol=TOP2A Isoform 2 of DNA topoisomerase 2-alpha                                 | 9606 | 2 |
| Gene_Symbol=TOP2A DNA topoisomerase 2                                                    | 9606 | 2 |
| Gene_Symbol=TOP2A Isoform 4 of DNA topoisomerase 2-alpha                                 | 9606 | 2 |
| Gene_Symbol=TOP2A DNA topoisomerase 2                                                    | 9606 | 2 |
| Gene_Symbol=TOP2A Isoform 3 of DNA topoisomerase 2-alpha                                 | 9606 | 2 |
| Gene_Symbol=TOP2A 183 kDa protein                                                        | 9606 | 2 |
| Gene_Symbol=RAD50 Isoform 2 of DNA repair protein RAD50                                  | 9606 | 1 |
| Gene_Symbol=RAD50 Isoform 1 of DNA repair protein RAD50                                  | 9606 | 1 |
| Gene_Symbol=RAD50 Isoform 3 of DNA repair protein RAD50                                  | 9606 | 1 |
| Gene_Symbol=RAD50 77 kDa protein                                                         | 9606 | 1 |
| Gene_Symbol=TUBA1C TUBA1C protein                                                        | 9606 | 1 |
| Gene_Symbol=TUBA1B Tubulin alpha-1B chain                                                | 9606 | 1 |
| Gene_Symbol=TUBA1C 19 kDa protein                                                        | 9606 | 1 |
| Gene_Symbol=TUBA1B cDNA FLJ60097, highly similar to Tubulin alpha-ubiquitous             | 9606 | 1 |
| Gene_Symbol=TUBA1C 29 kDa protein                                                        | 9606 | 1 |
| Gene_Symbol=TUBA1C cDNA FLJ55956, highly similar to Tubulin alpha-6 chain                | 9606 | 1 |
| Gene_Symbol=TUBA1C Tubulin alpha-1C chain                                                | 9606 | 1 |
| Gene_Symbol=TUBA1A Tubulin alpha-1A chain                                                | 9606 | 1 |
| Gene_Symbol=TUBA1A;TUBA1B cDNA FLJ53765, highly similar to Tubulin alpha class III       | 9606 | 1 |
| Gene_Symbol=TUBA1B TUBA1B protein                                                        | 9606 | 1 |
| Gene_Symbol=SPTAN1 Putative uncharacterized protein SPTAN1                               | 9606 | 1 |
| Gene_Symbol=SPTAN1 Isoform 2 of Spectrin alpha chain, brain                              | 9606 | 1 |
| Gene_Symbol=SPTAN1 Isoform 1 of Spectrin alpha chain, brain                              | 9606 | 1 |
| Gene_Symbol=SPTAN1 Isoform 3 of Spectrin alpha chain, brain                              | 9606 | 1 |
| Gene_Symbol=DHX9 ATP-dependent RNA helicase A                                            | 9606 | 1 |
| Gene_Symbol=SNRNP200 Isoform 1 of U5 small nuclear ribonucleoprotein 200 kDa             | 9606 | 1 |
| Gene_Symbol=LOC652147 similar to U5 snRNP-specific 200kD protein, partial                | 9606 | 1 |
| Gene_Symbol=SNRNP200 cDNA FLJ56901, highly similar to U5 small nuclear ribonucleoprotein | 9606 | 1 |
| Gene_Symbol=UBB;RPS27A;UBC 12 kDa protein                                                | 9606 | 1 |
| Gene_Symbol=- Pseudogene candidate                                                       | 9606 | 1 |
| Gene_Symbol=UBB;RPS27A;UBC ubiquitin and ribosomal protein S27a precursor                | 9606 | 1 |
| Gene_Symbol=UBB;RPS27A;UBC Ubiquitin                                                     | 9606 | 1 |
| Gene_Symbol=UBB;RPS27A;UBC ubiquitin C                                                   | 9606 | 1 |
| Gene_Symbol=UBB;RPS27A;UBC 19 kDa protein                                                | 9606 | 1 |
| Gene_Symbol=UBB;RPS27A;UBC 18 kDa protein                                                | 9606 | 1 |
| Gene_Symbol=UBB;RPS27A;UBC cDNA FLJ51326, highly similar to Homo sapiens                 | 9606 | 1 |
| Gene_Symbol=UBB;RPS27A;UBC 21 kDa protein                                                | 9606 | 1 |
| Gene_Symbol=UBB;RPS27A;UBC 21 kDa protein                                                | 9606 | 1 |
| Gene_Symbol=UBB;RPS27A;UBC 18 kDa protein                                                | 9606 | 1 |
| Gene_Symbol=UBB;RPS27A;UBC 19 kDa protein                                                | 9606 | 1 |
| Gene_Symbol=UBB;RPS27A;UBC UBC protein                                                   | 9606 | 1 |

|                                                                                |      |   |
|--------------------------------------------------------------------------------|------|---|
| Gene_Symbol=UBB;RPS27A;UBC 39 kDa protein                                      | 9606 | 1 |
| Gene_Symbol=UBB;RPS27A;UBC Ubiquitin C                                         | 9606 | 1 |
| Gene_Symbol=UBB;RPS27A;UBC 25 kDa protein                                      | 9606 | 1 |
| Gene_Symbol=UBB;RPS27A;UBC 16 kDa protein                                      | 9606 | 1 |
| Gene_Symbol=UBB;RPS27A;UBC 30 kDa protein                                      | 9606 | 1 |
| Gene_Symbol=UBB;RPS27A;UBC Ubiquitin C splice variant                          | 9606 | 1 |
| Gene_Symbol=UBB;RPS27A;UBC ubiquitin B precursor                               | 9606 | 1 |
| Gene_Symbol=UBB;RPS27A;UBC RPS27A protein                                      | 9606 | 1 |
| Gene_Symbol=UBA52 ubiquitin and ribosomal protein L40 precursor                | 9606 | 1 |
| Gene_Symbol=- 26 kDa protein                                                   | 9606 | 1 |
| Gene_Symbol=LOC653269;POTEEI;POTEM;LOC727848;POTEJ;POTEKP;POTEE;LOC6           | 9606 | 1 |
| Gene_Symbol=LOC653269;POTEEI;POTEM;LOC727848;POTEJ;POTEKP;POTEE;LOC6           | 9606 | 1 |
| Gene_Symbol=ACTG1 22 kDa protein                                               | 9606 | 1 |
| Gene_Symbol=LOC653269;POTEEI;POTEM;LOC727848;POTEJ;POTEKP;POTEE;LOC6           | 9606 | 1 |
| Gene_Symbol=ACTA1 Actin alpha 1 skeletal muscle protein                        | 9606 | 1 |
| Gene_Symbol=ACTB 14 kDa protein                                                | 9606 | 1 |
| Gene_Symbol=ACTC1 cDNA FLJ78096, highly similar to Homo sapiens actin, alpha   | 9606 | 1 |
| Gene_Symbol=ACTG1 cDNA FLJ57283, highly similar to Actin, cytoplasmic 2        | 9606 | 1 |
| Gene_Symbol=ACTB cDNA FLJ53662, highly similar to Actin, alpha skeletal muscle | 9606 | 1 |
| Gene_Symbol=- cDNA FLJ52755, highly similar to Actin, aortic smooth muscle     | 9606 | 1 |
| Gene_Symbol=ACTG2 Putative uncharacterized protein ACTG2                       | 9606 | 1 |
| Gene_Symbol=ACTG2 Putative uncharacterized protein ACTG2                       | 9606 | 1 |
| Gene_Symbol=ACTG2 11 kDa protein                                               | 9606 | 1 |
| Gene_Symbol=ACTB Putative uncharacterized protein ACTB                         | 9606 | 1 |
| Gene_Symbol=ACTB Beta actin variant (Fragment)                                 | 9606 | 1 |
| Gene_Symbol=ACTB;ACTG1 cDNA FLJ52842, highly similar to Actin, cytoplasmic 1   | 9606 | 1 |
| Gene_Symbol=ACTB Putative uncharacterized protein ACTB                         | 9606 | 1 |
| Gene_Symbol=ACTB Putative uncharacterized protein ACTB                         | 9606 | 1 |
| Gene_Symbol=ACTA1 cDNA FLJ39583 fis, clone SKMUS2004897, highly similar to     | 9606 | 1 |
| Gene_Symbol=ACTG1 16 kDa protein                                               | 9606 | 1 |
| Gene_Symbol=POTEF POTE ankyrin domain family member F                          | 9606 | 1 |
| Gene_Symbol=LOC653269;POTEEI;POTEM;LOC727848;POTEJ;POTEKP;POTEE;LOC6           | 9606 | 1 |
| Gene_Symbol=ACTA2 Actin, alpha 2, smooth muscle, aorta                         | 9606 | 1 |
| Gene_Symbol=ACTA1 Putative uncharacterized protein ACTA1                       | 9606 | 1 |
| Gene_Symbol=ACTG2 Actin, gamma-enteric smooth muscle                           | 9606 | 1 |
| Gene_Symbol=ACTC1 Actin, alpha cardiac muscle 1                                | 9606 | 1 |
| Gene_Symbol=ACTG1 Actin, cytoplasmic 2                                         | 9606 | 1 |
| Gene_Symbol=ACTB Actin, cytoplasmic 1                                          | 9606 | 1 |
| Gene_Symbol=ACTA1 Actin, alpha skeletal muscle                                 | 9606 | 1 |
| Gene_Symbol=ACTA2 Actin, aortic smooth muscle                                  | 9606 | 1 |
| Gene_Symbol=ACTG2 6 kDa protein                                                | 9606 | 1 |
| Gene_Symbol=ACTG2 cDNA FLJ51195, highly similar to Actin, gamma-enteric smc    | 9606 | 1 |
| Gene_Symbol=IARS Isoleucyl-tRNA synthetase, cytoplasmic                        | 9606 | 1 |
| Gene_Symbol=- Elongation factor 1-alpha                                        | 9606 | 1 |
| Gene_Symbol=EEF1A1P5;EEF1A1 Putative elongation factor 1-alpha-like 3          | 9606 | 1 |
| Gene_Symbol=EEF1A1 Elongation factor 1-alpha 1                                 | 9606 | 1 |
| Gene_Symbol=EEF1A1 Elongation factor 1-alpha                                   | 9606 | 1 |
| Gene_Symbol=- 18 kDa protein                                                   | 9606 | 1 |
| Gene_Symbol=UGGT1 Isoform 2 of UDP-glucose:glycoprotein glucosyltransferase    | 9606 | 1 |

| Name                                                                          | Species | Peptides(95 |
|-------------------------------------------------------------------------------|---------|-------------|
| Gene_Symbol=UGGT1 Isoform 1 of UDP-glucose:glycoprotein glucosyltransferase   | 9606    | 1           |
| Gene_Symbol=TF Serotransferrin                                                | 9606    | 16          |
| Gene_Symbol=CAND1 Isoform 1 of Cullin-associated NEDD8-dissociated protein 1  | 9606    | 13          |
| Gene_Symbol=DHX9 ATP-dependent RNA helicase A                                 | 9606    | 12          |
| Gene_Symbol=IPO5 Isoform 3 of Importin-5                                      | 9606    | 11          |
| Gene_Symbol=IPO5 Isoform 1 of Importin-5                                      | 9606    | 11          |
| Gene_Symbol=MYH9 Isoform 1 of Myosin-9                                        | 9606    | 9           |
| Gene_Symbol=MYH9 Isoform 2 of Myosin-9                                        | 9606    | 9           |
| Gene_Symbol=UBA1 Ubiquitin-like modifier-activating enzyme 1                  | 9606    | 7           |
| Gene_Symbol=- cDNA FLJ56074, highly similar to 150 kDa oxygen-regulated prote | 9606    | 6           |
| Gene_Symbol=HYOU1 Hypoxia up-regulated protein 1                              | 9606    | 6           |
| Gene_Symbol=SPTAN1 Putative uncharacterized protein SPTAN1                    | 9606    | 2           |
| Gene_Symbol=SPTAN1 Isoform 2 of Spectrin alpha chain, brain                   | 9606    | 2           |
| Gene_Symbol=SPTAN1 Isoform 1 of Spectrin alpha chain, brain                   | 9606    | 2           |
| Gene_Symbol=SPTAN1 Isoform 3 of Spectrin alpha chain, brain                   | 9606    | 2           |
| Gene_Symbol=DDB1;LOC100290337 DNA damage-binding protein 1                    | 9606    | 3           |
| Gene_Symbol=DDB1 cDNA FLJ51067, highly similar to DNA damage-binding prote    | 9606    | 2           |
| Gene_Symbol=EFTUD2 116 kDa U5 small nuclear ribonucleoprotein component i     | 9606    | 3           |
| Gene_Symbol=EFTUD2 116 kDa U5 small nuclear ribonucleoprotein component       | 9606    | 3           |
| Gene_Symbol=IPO9 Importin-9                                                   | 9606    | 2           |
| Gene_Symbol=FASN Fatty acid synthase                                          | 9606    | 1           |
| Gene_Symbol=TPP2 Tripeptidyl peptidase II                                     | 9606    | 3           |
| Gene_Symbol=TPP2 Tripeptidyl-peptidase 2                                      | 9606    | 3           |
| Gene_Symbol=COL1A1 Collagen alpha-1(I) chain                                  | 9606    | 3           |
| Gene_Symbol=HPX Hemopexin                                                     | 9606    | 2           |
| Gene_Symbol=ACLY ATP-citrate synthase isoform 2                               | 9606    | 3           |
| Gene_Symbol=ACLY cDNA FLJ56442, highly similar to ATP-citrate synthase        | 9606    | 3           |
| Gene_Symbol=ACLY ATP-citrate synthase                                         | 9606    | 3           |
| Gene_Symbol=- cDNA FLJ55447, highly similar to ATP-citrate synthase           | 9606    | 2           |
| Gene_Symbol=ALB Isoform 1 of Serum albumin                                    | 9606    | 2           |
| Gene_Symbol=ALB cDNA FLJ50830, highly similar to Serum albumin                | 9606    | 2           |
| Gene_Symbol=ALB Putative uncharacterized protein ALB                          | 9606    | 2           |
| Gene_Symbol=ALB 69 kDa protein                                                | 9606    | 2           |
| Gene_Symbol=ALB Putative uncharacterized protein ALB                          | 9606    | 2           |
| Gene_Symbol=ALB Isoform 2 of Serum albumin                                    | 9606    | 2           |
| Gene_Symbol=ALB Putative uncharacterized protein ALB                          | 9606    | 2           |
| Gene_Symbol=ALB ALB protein                                                   | 9606    | 2           |
| Gene_Symbol=NPM1 nucleophosmin isoform 3                                      | 9606    | 2           |
| Gene_Symbol=NPM1 Isoform 1 of Nucleophosmin                                   | 9606    | 2           |
| Gene_Symbol=NPM1 Isoform 2 of Nucleophosmin                                   | 9606    | 1           |
| Gene_Symbol=COL6A1 Collagen alpha-1(VI) chain                                 | 9606    | 2           |
| Gene_Symbol=MYH14 Isoform 2 of Myosin-14                                      | 9606    | 2           |
| Gene_Symbol=MYH14 myosin-14 isoform 3                                         | 9606    | 2           |
| Gene_Symbol=MYH14 myosin-14 isoform 1                                         | 9606    | 2           |
| Gene_Symbol=MYH14 Isoform 1 of Myosin-14                                      | 9606    | 2           |
| Gene_Symbol=MYH14 Isoform 4 of Myosin-14                                      | 9606    | 2           |

|                                                                                 |      |   |
|---------------------------------------------------------------------------------|------|---|
| Gene_Symbol=MYH14 Isoform 5 of Myosin-14                                        | 9606 | 2 |
| Gene_Symbol=IPO7 Importin-7                                                     | 9606 | 1 |
| Gene_Symbol=SF3B3 Isoform 1 of Splicing factor 3B subunit 3                     | 9606 | 1 |
| Gene_Symbol=KRT1 Keratin, type II cytoskeletal 1                                | 9606 | 1 |
| Gene_Symbol=NID1 Isoform 2 of Nidogen-1                                         | 9606 | 1 |
| Gene_Symbol=NID1 Isoform 1 of Nidogen-1                                         | 9606 | 1 |
| Gene_Symbol=- Elongation factor 1-alpha                                         | 9606 | 1 |
| Gene_Symbol=EEF1A1P5;EEF1A1 Putative elongation factor 1-alpha-like 3           | 9606 | 1 |
| Gene_Symbol=EEF1A1 Elongation factor 1-alpha 1                                  | 9606 | 1 |
| Gene_Symbol=EEF1A1 Elongation factor 1-alpha                                    | 9606 | 1 |
| Gene_Symbol=EEF1A2 Eukaryotic translation elongation factor 1 alpha 2 variant ( | 9606 | 1 |
| Gene_Symbol=EEF1A2 Elongation factor 1-alpha 2                                  | 9606 | 1 |
| Gene_Symbol=EEF1A1 EEF1A protein (Fragment)                                     | 9606 | 1 |
| Gene_Symbol=LARS cDNA FLJ58533, highly similar to Leucyl-tRNA synthetase, cyt   | 9606 | 1 |
| Gene_Symbol=LARS 134 kDa protein                                                | 9606 | 1 |
| Gene_Symbol=LARS Leucyl-tRNA synthetase, cytoplasmic                            | 9606 | 1 |
| Gene_Symbol=LARS cDNA FLJ58466, highly similar to Leucyl-tRNA synthetase, cyt   | 9606 | 1 |
| Gene_Symbol=CD44 Isoform 14 of CD44 antigen                                     | 9606 | 1 |
| Gene_Symbol=CD44 CD44 antigen isoform 1 precursor                               | 9606 | 1 |
| Gene_Symbol=CD44 78 kDa protein                                                 | 9606 | 1 |
| Gene_Symbol=CD44 CD44 antigen isoform 3 precursor                               | 9606 | 1 |
| Gene_Symbol=CD44 CD44                                                           | 9606 | 1 |
| Gene_Symbol=- cDNA FLJ52702, highly similar to Homo sapiens CD44 antigen (hc    | 9606 | 1 |
| Gene_Symbol=CD44 Putative uncharacterized protein CD44                          | 9606 | 1 |
| Gene_Symbol=CD44 Isoform 17 of CD44 antigen                                     | 9606 | 1 |
| Gene_Symbol=CD44 81 kDa protein                                                 | 9606 | 1 |
| Gene_Symbol=CD44 Isoform 15 of CD44 antigen                                     | 9606 | 1 |
| Gene_Symbol=CD44 Isoform 6 of CD44 antigen                                      | 9606 | 1 |
| Gene_Symbol=CD44 Isoform 16 of CD44 antigen                                     | 9606 | 1 |
| Gene_Symbol=CD44 Isoform 13 of CD44 antigen                                     | 9606 | 1 |
| Gene_Symbol=CD44 Isoform 11 of CD44 antigen                                     | 9606 | 1 |
| Gene_Symbol=CD44 Isoform 8 of CD44 antigen                                      | 9606 | 1 |
| Gene_Symbol=CD44 Isoform 7 of CD44 antigen                                      | 9606 | 1 |
| Gene_Symbol=CD44 Isoform 3 of CD44 antigen                                      | 9606 | 1 |
| Gene_Symbol=CD44 Isoform 9 of CD44 antigen                                      | 9606 | 1 |
| Gene_Symbol=CD44 Isoform 10 of CD44 antigen                                     | 9606 | 1 |
| Gene_Symbol=CD44 Isoform 4 of CD44 antigen                                      | 9606 | 1 |
| Gene_Symbol=CD44 Isoform 1 of CD44 antigen                                      | 9606 | 1 |
| Gene_Symbol=CD44 Isoform 12 of CD44 antigen                                     | 9606 | 1 |
| Gene_Symbol=CNTN1 Isoform 2 of Contactin-1                                      | 9606 | 1 |
| Gene_Symbol=CNTN1 Isoform 1 of Contactin-1                                      | 9606 | 1 |
| Gene_Symbol=CNTN1 Isoform 3 of Contactin-1                                      | 9606 | 1 |
| Gene_Symbol=UPF1 Isoform 2 of Regulator of nonsense transcripts 1               | 9606 | 1 |
| Gene_Symbol=UPF1 Isoform 1 of Regulator of nonsense transcripts 1               | 9606 | 1 |

| Name                              | Species | Peptides(95) |
|-----------------------------------|---------|--------------|
| Gene_Symbol=ACTN4 Alpha-actinin-4 | 9606    | 44           |
| Gene_Symbol=TF Serotransferrin    | 9606    | 31           |

|                                                                                           |      |    |
|-------------------------------------------------------------------------------------------|------|----|
| Gene_Symbol=EEF2 Elongation factor 2                                                      | 9606 | 18 |
| Gene_Symbol=VCP Transitional endoplasmic reticulum ATPase                                 | 9606 | 17 |
| Gene_Symbol=ACTN1 Alpha-actinin-1                                                         | 9606 | 31 |
| Gene_Symbol=ACTN1 Actinin alpha 1 isoform 3                                               | 9606 | 30 |
| Gene_Symbol=ACTN1 alpha-actinin-1 isoform c                                               | 9606 | 30 |
| Gene_Symbol=ACTN1 alpha-actinin-1 isoform a                                               | 9606 | 30 |
| Gene_Symbol=GANAB Isoform 2 of Neutral alpha-glucosidase AB                               | 9606 | 13 |
| Gene_Symbol=GANAB cDNA FLJ61290, highly similar to Neutral alpha-glucosidase              | 9606 | 13 |
| Gene_Symbol=HSP90B1 Endoplasmin                                                           | 9606 | 12 |
| Gene_Symbol=PYGL glycogen phosphorylase, liver form isoform 2                             | 9606 | 12 |
| Gene_Symbol=PYGL Glycogen phosphorylase, liver form                                       | 9606 | 12 |
| Gene_Symbol=NPEPPS Puromycin-sensitive aminopeptidase                                     | 9606 | 7  |
| Gene_Symbol=APP Isoform APP751 of Amyloid beta A4 protein (Fragment)                      | 9606 | 6  |
| Gene_Symbol=APP Isoform L-APP752 of Amyloid beta A4 protein (Fragment)                    | 9606 | 6  |
| Gene_Symbol=APP Isoform L-APP733 of Amyloid beta A4 protein (Fragment)                    | 9606 | 6  |
| Gene_Symbol=APP Isoform APP770 of Amyloid beta A4 protein (Fragment)                      | 9606 | 6  |
| Gene_Symbol=APP Isoform APP695 of Amyloid beta A4 protein (Fragment)                      | 9606 | 6  |
| Gene_Symbol=APP Isoform APP714 of Amyloid beta A4 protein (Fragment)                      | 9606 | 6  |
| Gene_Symbol=APP Isoform L-APP696 of Amyloid beta A4 protein (Fragment)                    | 9606 | 6  |
| Gene_Symbol=APP Isoform L-APP677 of Amyloid beta A4 protein (Fragment)                    | 9606 | 6  |
| Gene_Symbol=APP amyloid beta A4 protein isoform f precursor                               | 9606 | 6  |
| Gene_Symbol=APP Isoform APP639 of Amyloid beta A4 protein                                 | 9606 | 6  |
| Gene_Symbol=SFPQ Isoform Long of Splicing factor, proline- and glutamine-rich             | 9606 | 5  |
| Gene_Symbol=SFPQ Isoform Short of Splicing factor, proline- and glutamine-rich            | 9606 | 5  |
| Gene_Symbol=CSE1L Isoform 3 of Exportin-2                                                 | 9606 | 5  |
| Gene_Symbol=CSE1L Isoform 1 of Exportin-2                                                 | 9606 | 5  |
| Gene_Symbol=AVIL Isoform 1 of Advillin                                                    | 9606 | 4  |
| Gene_Symbol=NCL Nucleolin                                                                 | 9606 | 4  |
| Gene_Symbol=NCL cDNA FLJ45706 fis, clone FEBRA2028457, highly similar to Nucleolin        | 9606 | 4  |
| Gene_Symbol=MTHFD1 C-1-tetrahydrofolate synthase, cytoplasmic                             | 9606 | 4  |
| Gene_Symbol=MTHFD1 cDNA FLJ56016, highly similar to C-1-tetrahydrofolate synthase         | 9606 | 3  |
| Gene_Symbol=PARP1 Poly [ADP-ribose] polymerase 1                                          | 9606 | 4  |
| Gene_Symbol=PARP1 cDNA FLJ53442, highly similar to Poly (ADP-ribose) polymerase           | 9606 | 4  |
| Gene_Symbol=LGALS3BP Galectin-3-binding protein                                           | 9606 | 4  |
| Gene_Symbol=LGALS3BP cDNA FLJ54583, highly similar to Galectin-3-binding protein          | 9606 | 3  |
| Gene_Symbol=LGALS3BP cDNA FLJ53509, highly similar to Galectin-3-binding protein          | 9606 | 3  |
| Gene_Symbol=ENTPD4;LOXL2 Lysyl oxidase homolog 2                                          | 9606 | 3  |
| Gene_Symbol=HSPA4 Heat shock 70 kDa protein 4                                             | 9606 | 2  |
| Gene_Symbol=KPNB1 Importin subunit beta-1                                                 | 9606 | 3  |
| Gene_Symbol=SF3B3 Isoform 1 of Splicing factor 3B subunit 3                               | 9606 | 3  |
| Gene_Symbol=XPO1 cDNA FLJ55480, highly similar to Exportin-1                              | 9606 | 3  |
| Gene_Symbol=XPO1 Exportin-1                                                               | 9606 | 3  |
| Gene_Symbol=MYH9 Isoform 1 of Myosin-9                                                    | 9606 | 2  |
| Gene_Symbol=TUBB Tubulin, beta                                                            | 9606 | 2  |
| Gene_Symbol=TUBB Tubulin, beta                                                            | 9606 | 2  |
| Gene_Symbol=TUBB2A cDNA, FLJ93005, highly similar to Homo sapiens tubulin, beta class III | 9606 | 2  |
| Gene_Symbol=TUBB2B Tubulin beta-2B chain                                                  | 9606 | 2  |
| Gene_Symbol=TUBB2A Tubulin beta-2A chain                                                  | 9606 | 2  |
| Gene_Symbol=TUBB2C Tubulin beta-2C chain                                                  | 9606 | 2  |



|                                                                              |      |   |
|------------------------------------------------------------------------------|------|---|
| Gene_Symbol=TUBB3;MC1R cDNA FLJ77784                                         | 9606 | 1 |
| Gene_Symbol=MC1R;TUBB3 Tubulin, beta, 4                                      | 9606 | 1 |
| Gene_Symbol=TUBB3 Tubulin beta-3 chain                                       | 9606 | 1 |
| Gene_Symbol=TUBB6 TUBB6 protein                                              | 9606 | 1 |
| Gene_Symbol=TUBB4Q;TUBB8 tubulin beta-8 chain isoform 2                      | 9606 | 1 |
| Gene_Symbol=TUBB cDNA FLJ56903, highly similar to Tubulin beta-7 chain       | 9606 | 1 |
| Gene_Symbol=- cDNA FLJ53063, highly similar to Tubulin beta-7 chain          | 9606 | 1 |
| Gene_Symbol=- 20 kDa protein                                                 | 9606 | 1 |
| Gene_Symbol=TUBB8;TUBB4Q Tubulin, beta 8, isoform CRA_c                      | 9606 | 1 |
| Gene_Symbol=TUBB8 Tubulin beta-8 chain                                       | 9606 | 1 |
| Gene_Symbol=MIR220B cDNA FLJ55189, highly similar to Tubulin beta-4 chain    | 9606 | 1 |
| Gene_Symbol=TUBB6 cDNA FLJ11352 fis, clone HEMBA1000020, highly similar to   | 9606 | 1 |
| Gene_Symbol=TUBB4;MIR220B cDNA FLJ53341, highly similar to Tubulin beta-4 c  | 9606 | 1 |
| Gene_Symbol=TUBBP5 Putative tubulin beta chain-like protein ENSP0000029037   | 9606 | 1 |
| Gene_Symbol=- Tubulin beta-8 chain B                                         | 9606 | 1 |
| Gene_Symbol=TUBB4 Tubulin beta-4 chain                                       | 9606 | 1 |
| Gene_Symbol=TUBB4 27 kDa protein                                             | 9606 | 1 |
| Gene_Symbol=MIR220B cDNA FLJ52536, highly similar to Tubulin beta-4 chain    | 9606 | 1 |
| Gene_Symbol=TUBB6 cDNA FLJ52712, highly similar to Tubulin beta-6 chain      | 9606 | 1 |
| Gene_Symbol=TUBB6 43 kDa protein                                             | 9606 | 1 |
| Gene_Symbol=TUBB6 46 kDa protein                                             | 9606 | 1 |
| Gene_Symbol=TUBB cDNA FLJ53012, highly similar to Tubulin beta-7 chain       | 9606 | 1 |
| Gene_Symbol=KRT1 Keratin, type II cytoskeletal 1                             | 9606 | 2 |
| Gene_Symbol=VIL1 Villin-1                                                    | 9606 | 2 |
| Gene_Symbol=VIL1 cDNA FLJ57609, highly similar to Villin-1                   | 9606 | 2 |
| Gene_Symbol=VIL1 23 kDa protein                                              | 9606 | 1 |
| Gene_Symbol=PSMD2 86 kDa protein                                             | 9606 | 1 |
| Gene_Symbol=PSMD2 26S proteasome non-ATPase regulatory subunit 2             | 9606 | 1 |
| Gene_Symbol=PSMD2 cDNA FLJ55045, highly similar to 26S proteasome non-ATP    | 9606 | 1 |
| Gene_Symbol=PSMD2 P67                                                        | 9606 | 1 |
| Gene_Symbol=PSMD2 Protein                                                    | 9606 | 1 |
| Gene_Symbol=PSMD2 22 kDa protein                                             | 9606 | 1 |
| Gene_Symbol=- 27 kDa protein                                                 | 9606 | 1 |
| Gene_Symbol=PDCD6IP programmed cell death 6-interacting protein isoform 2    | 9606 | 1 |
| Gene_Symbol=PDCD6IP Programmed cell death 6-interacting protein              | 9606 | 1 |
| Gene_Symbol=LOC731884 similar to programmed cell death 6 interacting protein | 9606 | 1 |
| Gene_Symbol=SPTAN1 Putative uncharacterized protein SPTAN1                   | 9606 | 1 |
| Gene_Symbol=SPTAN1 Isoform 2 of Spectrin alpha chain, brain                  | 9606 | 1 |
| Gene_Symbol=SPTAN1 Isoform 1 of Spectrin alpha chain, brain                  | 9606 | 1 |
| Gene_Symbol=SPTAN1 Isoform 3 of Spectrin alpha chain, brain                  | 9606 | 1 |
| Gene_Symbol=ALB 52 kDa protein                                               | 9606 | 1 |
| Gene_Symbol=ALB Protein                                                      | 9606 | 1 |
| Gene_Symbol=ALB cDNA FLJ50830, highly similar to Serum albumin               | 9606 | 1 |
| Gene_Symbol=ALB Putative uncharacterized protein ALB                         | 9606 | 1 |
| Gene_Symbol=ALB Isoform 1 of Serum albumin                                   | 9606 | 1 |
| Gene_Symbol=ALB Putative uncharacterized protein ALB                         | 9606 | 1 |
| Gene_Symbol=ALB 69 kDa protein                                               | 9606 | 1 |
| Gene_Symbol=ALB 23 kDa protein                                               | 9606 | 1 |
| Gene_Symbol=UBA1 Ubiquitin-like modifier-activating enzyme 1                 | 9606 | 1 |

|                                                                               |      |   |
|-------------------------------------------------------------------------------|------|---|
| Gene_Symbol=HSP90AA1 Isoform 1 of Heat shock protein HSP 90-alpha             | 9606 | 1 |
| Gene_Symbol=TRAP1 Heat shock protein 75 kDa, mitochondrial                    | 9606 | 1 |
| Gene_Symbol=HSP90AB1 Heat shock protein HSP 90-beta                           | 9606 | 2 |
| Gene_Symbol=HSP90AB3P Putative heat shock protein HSP 90-beta-3               | 9606 | 2 |
| Gene_Symbol=HSP90AA1 Isoform 2 of Heat shock protein HSP 90-alpha             | 9606 | 1 |
| Gene_Symbol=HSP90AA1 Hsp89-alpha-delta-N                                      | 9606 | 1 |
| Gene_Symbol=HSP90AB1 Heat shock protein 90kDa alpha (Cytosolic), class B mer  | 9606 | 1 |
| Gene_Symbol=HSP90AB1 Heat shock protein 90kDa alpha (Cytosolic), class B mer  | 9606 | 1 |
| Gene_Symbol=HSP90AB1 Heat shock protein 90kDa alpha (Cytosolic), class B mer  | 9606 | 1 |
| Gene_Symbol=TRAP1 57 kDa protein                                              | 9606 | 1 |
| Gene_Symbol=HNRNPU Isoform Long of Heterogeneous nuclear ribonucleoprote      | 9606 | 1 |
| Gene_Symbol=HNRNPU cDNA FLJ54020, highly similar to Heterogeneous nuclear     | 9606 | 1 |
| Gene_Symbol=HNRNPU Isoform Short of Heterogeneous nuclear ribonucleoprote     | 9606 | 1 |
| Gene_Symbol=HNRNPU HNRPU protein                                              | 9606 | 1 |
| Gene_Symbol=SF3B1 Splicing factor 3B subunit 1                                | 9606 | 1 |
| Gene_Symbol=HPX Hemopexin                                                     | 9606 | 1 |
| Gene_Symbol=ENPP2 Isoform 2 of Ectonucleotide pyrophosphatase/phosphodie      | 9606 | 1 |
| Gene_Symbol=ENPP2 Isoform 3 of Ectonucleotide pyrophosphatase/phosphodie      | 9606 | 1 |
| Gene_Symbol=ENPP2 Isoform 1 of Ectonucleotide pyrophosphatase/phosphodie      | 9606 | 1 |
| Gene_Symbol=HSPH1 Isoform Alpha of Heat shock protein 105 kDa                 | 9606 | 1 |
| Gene_Symbol=HSPH1 cDNA FLJ52364, highly similar to Heat-shock protein 105 kDa | 9606 | 1 |
| Gene_Symbol=HSPH1 Isoform 3 of Heat shock protein 105 kDa                     | 9606 | 1 |
| Gene_Symbol=HSPH1 Isoform Beta of Heat shock protein 105 kDa                  | 9606 | 1 |
| Gene_Symbol=HSPH1 cDNA FLJ52360, highly similar to Heat-shock protein 105 kDa | 9606 | 1 |
| Gene_Symbol=HSPH1 cDNA FLJ51707, highly similar to Heat-shock protein 105 kDa | 9606 | 1 |
| Gene_Symbol=HK1 cDNA FLJ46359 fis, clone TEST14049786, highly similar to Hex  | 9606 | 1 |
| Gene_Symbol=HK1 Isoform 3 of Hexokinase-1                                     | 9606 | 1 |
| Gene_Symbol=HK1 Isoform 1 of Hexokinase-1                                     | 9606 | 1 |
| Gene_Symbol=HK1 Isoform 4 of Hexokinase-1                                     | 9606 | 1 |
| Gene_Symbol=HK1 Isoform 2 of Hexokinase-1                                     | 9606 | 1 |
| Gene_Symbol=CTNNA1 Putative uncharacterized protein CTNNA1                    | 9606 | 1 |
| Gene_Symbol=CTNNA1 Isoform 2 of Catenin alpha-1                               | 9606 | 1 |
| Gene_Symbol=CTNNA1 Isoform 1 of Catenin alpha-1                               | 9606 | 1 |
| Gene_Symbol=IGHM FLJ00385 protein (Fragment)                                  | 9606 | 1 |
| Gene_Symbol=IGHG3 Protein                                                     | 9606 | 1 |
| Gene_Symbol=LOC100294459;IGHV4-31;IGHG1;LOC100290146 Putative unchara         | 9606 | 1 |
| Gene_Symbol=IGHG3 Ig gamma-3 chain C region                                   | 9606 | 1 |
| Gene_Symbol=LOC100294459;IGHV4-31;IGHG1;LOC100290146 IGH@ protein             | 9606 | 1 |
| Gene_Symbol=LOC100294459;IGHV4-31;IGHG1;LOC100290146 Anti-RhD monocl          | 9606 | 1 |
| Gene_Symbol=LOC100294459;IGHV4-31;IGHG1;LOC100290146 Putative unchara         | 9606 | 1 |
| Gene_Symbol=IGHM Putative uncharacterized protein DKFzp686I15212              | 9606 | 1 |
| Gene_Symbol=LOC100294459;IGHV4-31;IGHG1;LOC100290146 cDNA FLJ78387            | 9606 | 1 |
| Gene_Symbol=LOC100294459;IGHV4-31;IGHG1;LOC100290146 Putative unchara         | 9606 | 1 |
| Gene_Symbol=LOC100294459;IGHV4-31;IGHG1;LOC100290146 Putative unchara         | 9606 | 1 |
| Gene_Symbol=LOC100294459;IGHV4-31;IGHG1;LOC100290146 44 kDa protein           | 9606 | 1 |
| Gene_Symbol=LOC100294459;IGHV4-31;IGHG1;LOC100290146 Putative unchara         | 9606 | 1 |
| Gene_Symbol=LOC100294459;IGHV4-31;IGHG1;LOC100290146 Putative unchara         | 9606 | 1 |
| Gene_Symbol=LOC100294459;IGHV4-31;IGHG1;LOC100290146 Putative unchara         | 9606 | 1 |
| Gene_Symbol=LOC100294459;IGHV4-31;IGHG1;LOC100290146 Putative unchara         | 9606 | 1 |

|                                                                                     |      |   |
|-------------------------------------------------------------------------------------|------|---|
| Gene_Symbol=- Keratin-8-like protein 1                                              | 9606 | 1 |
| Gene_Symbol=LOC728638 Similar to Keratin, type II cytoskeletal 8                    | 9606 | 1 |
| Gene_Symbol=KRT8 25 kDa protein                                                     | 9606 | 1 |
| Gene_Symbol=KRT8 Keratin, type II cytoskeletal 8                                    | 9606 | 1 |
| Gene_Symbol=FLJ46111 cDNA FLJ46111 fis, clone TESTI2034913, moderately sim          | 9606 | 1 |
| Gene_Symbol=KRT8 17 kDa protein                                                     | 9606 | 1 |
| Gene_Symbol=KRT8 27 kDa protein                                                     | 9606 | 1 |
| Gene_Symbol=KRT8 14 kDa protein                                                     | 9606 | 1 |
| Gene_Symbol=ALDH1L1 cDNA FLJ53469, highly similar to 10-formyltetrahydrofolate      | 9606 | 1 |
| Gene_Symbol=ALDH1L1 88 kDa protein                                                  | 9606 | 1 |
| Gene_Symbol=ALDH1L1 Formyltetrahydrofolate dehydrogenase isoform a variant          | 9606 | 1 |
| Gene_Symbol=ALDH1L1 10-formyltetrahydrofolate dehydrogenase                         | 9606 | 1 |
| Gene_Symbol=ALDH1L1 Aldehyde dehydrogenase 1 family, member L1, isoform C           | 9606 | 1 |
| Gene_Symbol=PSMD1 Isoform 2 of 26S proteasome non-ATPase regulatory subunit         | 9606 | 1 |
| Gene_Symbol=PSMD1 Isoform 1 of 26S proteasome non-ATPase regulatory subunit         | 9606 | 1 |
| Gene_Symbol=PSMD1 Protein                                                           | 9606 | 1 |
| Gene_Symbol=TUBA8 Putative uncharacterized protein DKFZp686L04275 (Fragment)        | 9606 | 1 |
| Gene_Symbol=TUBA1B Tubulin alpha-1B chain                                           | 9606 | 1 |
| Gene_Symbol=TUBA1B TUBA1B protein                                                   | 9606 | 1 |
| Gene_Symbol=TUBA1B cDNA FLJ60097, highly similar to Tubulin alpha-ubiquitous        | 9606 | 1 |
| Gene_Symbol=TUBA8 cDNA FLJ32385 fis, clone SKMUS1000110, highly similar to          | 9606 | 1 |
| Gene_Symbol=TUBA8 Putative uncharacterized protein TUBA8                            | 9606 | 1 |
| Gene_Symbol=TUBA8 Tubulin alpha-8 chain                                             | 9606 | 1 |
| Gene_Symbol=TUBA1C Tubulin alpha-1C chain                                           | 9606 | 1 |
| Gene_Symbol=TUBA4A;TUBA1B Putative uncharacterized protein TUBA4A                   | 9606 | 1 |
| Gene_Symbol=- Putative uncharacterized protein ENSP00000351411                      | 9606 | 1 |
| Gene_Symbol=TUBA4A cDNA FLJ58687, highly similar to Tubulin alpha-4 chain           | 9606 | 1 |
| Gene_Symbol=TUBA1C 29 kDa protein                                                   | 9606 | 1 |
| Gene_Symbol=TUBA1C cDNA FLJ55956, highly similar to Tubulin alpha-6 chain           | 9606 | 1 |
| Gene_Symbol=TUBA4A Putative uncharacterized protein TUBA4A                          | 9606 | 1 |
| Gene_Symbol=TUBA4B Putative tubulin-like protein alpha-4B                           | 9606 | 1 |
| Gene_Symbol=TUBA4A Tubulin alpha-4A chain                                           | 9606 | 1 |
| Gene_Symbol=- Putative uncharacterized protein ENSP00000403894                      | 9606 | 1 |
| Gene_Symbol=LAMP1 cDNA FLJ57633, highly similar to Lysosome-associated membrane     | 9606 | 1 |
| Gene_Symbol=LAMP1 Lysosome-associated membrane glycoprotein 1                       | 9606 | 1 |
| Gene_Symbol=ERAP1 Isoform 1 of Endoplasmic reticulum aminopeptidase 1               | 9606 | 1 |
| Gene_Symbol=ERAP1 Isoform 2 of Endoplasmic reticulum aminopeptidase 1               | 9606 | 1 |
| Gene_Symbol=ERAP1 Protein                                                           | 9606 | 1 |
| Gene_Symbol=CLTC Isoform 2 of Clathrin heavy chain 1                                | 9606 | 1 |
| Gene_Symbol=CLTC Isoform 1 of Clathrin heavy chain 1                                | 9606 | 1 |
| Gene_Symbol=CLTCL1 Isoform 2 of Clathrin heavy chain 2                              | 9606 | 1 |
| Gene_Symbol=CLTCL1 Isoform 1 of Clathrin heavy chain 2                              | 9606 | 1 |
| Gene_Symbol=SND1 Staphylococcal nuclease domain-containing protein 1                | 9606 | 1 |
| Gene_Symbol=COPG Coatamer subunit gamma                                             | 9606 | 1 |
| Gene_Symbol=COPG2 Coatamer subunit gamma-2                                          | 9606 | 1 |
| Gene_Symbol=NAA25 Isoform 1 of N-alpha-acetyltransferase 25, NatB auxiliary subunit | 9606 | 1 |
| Gene_Symbol=NAA25 Isoform 2 of N-alpha-acetyltransferase 25, NatB auxiliary subunit | 9606 | 1 |
| Gene_Symbol=MGAT5 Alpha-1,6-mannosylglycoprotein 6-beta-N-acetylglucosaminyl        | 9606 | 1 |
| Gene_Symbol=PLCB4 1-phosphatidylinositol-4,5-bisphosphate phosphodiesterase         | 9606 | 1 |

|                                                                                    |      |   |
|------------------------------------------------------------------------------------|------|---|
| Gene_Symbol=PLCB4 Isoform 2 of 1-phosphatidylinositol-4,5-bisphosphate phosphatase | 9606 | 1 |
| Gene_Symbol=PLCB4 Isoform 1 of 1-phosphatidylinositol-4,5-bisphosphate phosphatase | 9606 | 1 |
| Gene_Symbol=PLCB4 Isoform 3 of 1-phosphatidylinositol-4,5-bisphosphate phosphatase | 9606 | 1 |

| Name                                                                                        | Species | Peptides(95) |
|---------------------------------------------------------------------------------------------|---------|--------------|
| Gene_Symbol=TF Serotransferrin                                                              | 9606    | 83           |
| Gene_Symbol=HSP90AA1 Isoform 1 of Heat shock protein HSP 90-alpha                           | 9606    | 26           |
| Gene_Symbol=HSP90AA1 Isoform 2 of Heat shock protein HSP 90-alpha                           | 9606    | 26           |
| Gene_Symbol=GSN Isoform 1 of Gelsolin                                                       | 9606    | 33           |
| Gene_Symbol=GSN gelsolin isoform c                                                          | 9606    | 32           |
| Gene_Symbol=HSP90AB1 Heat shock protein HSP 90-beta                                         | 9606    | 21           |
| Gene_Symbol=AVIL Isoform 1 of Advillin                                                      | 9606    | 6            |
| Gene_Symbol=AVIL Isoform 2 of Advillin                                                      | 9606    | 5            |
| Gene_Symbol=NCL Nucleolin                                                                   | 9606    | 4            |
| Gene_Symbol=NCL cDNA FLJ45706 fis, clone FEBRA2028457, highly similar to Nucleolin          | 9606    | 4            |
| Gene_Symbol=XRCC5 X-ray repair cross-complementing protein 5                                | 9606    | 4            |
| Gene_Symbol=LGALS3BP Galectin-3-binding protein                                             | 9606    | 4            |
| Gene_Symbol=LGALS3BP cDNA FLJ54583, highly similar to Galectin-3-binding protein            | 9606    | 3            |
| Gene_Symbol=QSOX1 Putative uncharacterized protein QSOX1                                    | 9606    | 3            |
| Gene_Symbol=QSOX1 Isoform 2 of Sulfhydryl oxidase 1                                         | 9606    | 3            |
| Gene_Symbol=QSOX1 Isoform 1 of Sulfhydryl oxidase 1                                         | 9606    | 3            |
| Gene_Symbol=QSOX1 Bone-derived growth factor (Fragment)                                     | 9606    | 2            |
| Gene_Symbol=RRM1 Ribonucleoside-diphosphate reductase large subunit                         | 9606    | 3            |
| Gene_Symbol=RRM1 Ribonucleoside-diphosphate reductase                                       | 9606    | 3            |
| Gene_Symbol=HNRNPU Isoform Long of Heterogeneous nuclear ribonucleoprotein                  | 9606    | 2            |
| Gene_Symbol=HNRNPU HNRPU protein                                                            | 9606    | 2            |
| Gene_Symbol=HNRNPU cDNA FLJ54020, highly similar to Heterogeneous nuclear ribonucleoprotein | 9606    | 2            |
| Gene_Symbol=HNRNPU Isoform Short of Heterogeneous nuclear ribonucleoprotein                 | 9606    | 2            |
| Gene_Symbol=SFPQ Isoform Short of Splicing factor, proline- and glutamine-rich              | 9606    | 2            |
| Gene_Symbol=SFPQ Isoform Long of Splicing factor, proline- and glutamine-rich               | 9606    | 2            |
| Gene_Symbol=VPS35 Vacuolar protein sorting-associated protein 35                            | 9606    | 2            |
| Gene_Symbol=QSOX2 Sulfhydryl oxidase 2                                                      | 9606    | 2            |
| Gene_Symbol=IQGAP1 Ras GTPase-activating-like protein IQGAP1                                | 9606    | 2            |
| Gene_Symbol=ACTN1 Actinin alpha 1 isoform 3                                                 | 9606    | 2            |
| Gene_Symbol=ACTN1 alpha-actinin-1 isoform c                                                 | 9606    | 2            |
| Gene_Symbol=ACTN1 alpha-actinin-1 isoform a                                                 | 9606    | 2            |
| Gene_Symbol=ACTN1 Alpha-actinin-1                                                           | 9606    | 2            |
| Gene_Symbol=ACTN4 Alpha-actinin-4                                                           | 9606    | 2            |
| Gene_Symbol=ACTN4 39 kDa protein                                                            | 9606    | 1            |
| Gene_Symbol=ACTN4 Actinin alpha4 isoform                                                    | 9606    | 1            |
| Gene_Symbol=ACTN4 cDNA FLJ61380, highly similar to Alpha-actinin-4                          | 9606    | 1            |
| Gene_Symbol=ILF3 Isoform 6 of Interleukin enhancer-binding factor 3                         | 9606    | 1            |
| Gene_Symbol=ILF3 interleukin enhancer-binding factor 3 isoform d                            | 9606    | 1            |
| Gene_Symbol=ILF3 Isoform 3 of Interleukin enhancer-binding factor 3                         | 9606    | 1            |
| Gene_Symbol=ILF3 Isoform 2 of Interleukin enhancer-binding factor 3                         | 9606    | 1            |
| Gene_Symbol=ILF3 Isoform 1 of Interleukin enhancer-binding factor 3                         | 9606    | 1            |
| Gene_Symbol=ILF3 Isoform 5 of Interleukin enhancer-binding factor 3                         | 9606    | 1            |
| Gene_Symbol=ILF3 Interleukin enhancer binding factor 3 isoform c variant (Fragment)         | 9606    | 1            |

|                                                                                  |      |   |
|----------------------------------------------------------------------------------|------|---|
| Gene_Symbol=QARS cDNA FLJ54453, highly similar to Glutaminyl-tRNA synthetas      | 9606 | 1 |
| Gene_Symbol=QARS cDNA FLJ54314, highly similar to Glutaminyl-tRNA synthetas      | 9606 | 1 |
| Gene_Symbol=QARS Glutaminyl-tRNA synthetase                                      | 9606 | 1 |
| Gene_Symbol=QARS cDNA FLJ54487, highly similar to Glutaminyl-tRNA synthetas      | 9606 | 1 |
| Gene_Symbol=QARS cDNA FLJ75085, highly similar to Homo sapiens glutaminyl-t      | 9606 | 1 |
| Gene_Symbol=QARS 29 kDa protein                                                  | 9606 | 1 |
| Gene_Symbol=ALCAM cDNA, FLJ79012, highly similar to CD166 antigen                | 9606 | 1 |
| Gene_Symbol=ALCAM Isoform 2 of CD166 antigen                                     | 9606 | 1 |
| Gene_Symbol=ALCAM cDNA FLJ52980, highly similar to CD166 antigen                 | 9606 | 1 |
| Gene_Symbol=ALCAM Activated leukocyte cell adhesion molecule soluble isoform     | 9606 | 1 |
| Gene_Symbol=ALCAM Isoform 1 of CD166 antigen                                     | 9606 | 1 |
| Gene_Symbol=ALCAM Protein                                                        | 9606 | 1 |
| Gene_Symbol=MYH9 Isoform 1 of Myosin-9                                           | 9606 | 1 |
| Gene_Symbol=APP amyloid beta A4 protein isoform f precursor                      | 9606 | 1 |
| Gene_Symbol=APP cDNA FLJ54261, highly similar to Homo sapiens amyloid beta       | 9606 | 1 |
| Gene_Symbol=APP Isoform APP751 of Amyloid beta A4 protein (Fragment)             | 9606 | 1 |
| Gene_Symbol=APP Isoform L-APP752 of Amyloid beta A4 protein (Fragment)           | 9606 | 1 |
| Gene_Symbol=APP Isoform APP695 of Amyloid beta A4 protein (Fragment)             | 9606 | 1 |
| Gene_Symbol=APP Isoform L-APP733 of Amyloid beta A4 protein (Fragment)           | 9606 | 1 |
| Gene_Symbol=APP Isoform APP714 of Amyloid beta A4 protein (Fragment)             | 9606 | 1 |
| Gene_Symbol=APP Isoform L-APP696 of Amyloid beta A4 protein (Fragment)           | 9606 | 1 |
| Gene_Symbol=APP Isoform L-APP677 of Amyloid beta A4 protein (Fragment)           | 9606 | 1 |
| Gene_Symbol=APP Isoform APP770 of Amyloid beta A4 protein (Fragment)             | 9606 | 1 |
| Gene_Symbol=APP Isoform APP639 of Amyloid beta A4 protein                        | 9606 | 1 |
| Gene_Symbol=KRT1 Keratin, type II cytoskeletal 1                                 | 9606 | 1 |
| Gene_Symbol=KPNB1 Importin subunit beta-1                                        | 9606 | 1 |
| Gene_Symbol=KRT75 65 kDa protein                                                 | 9606 | 1 |
| Gene_Symbol=KRT79 Keratin, type II cytoskeletal 79                               | 9606 | 1 |
| Gene_Symbol=KRT75 Keratin, type II cytoskeletal 75                               | 9606 | 1 |
| Gene_Symbol=KRT5 Keratin, type II cytoskeletal 5                                 | 9606 | 1 |
| Gene_Symbol=KRT6C 58 kDa protein                                                 | 9606 | 1 |
| Gene_Symbol=KRT6A 58 kDa protein                                                 | 9606 | 1 |
| Gene_Symbol=KRT6C cDNA, FLJ93744, highly similar to Homo sapiens keratin 6E      | 9606 | 1 |
| Gene_Symbol=- cDNA FLJ60647, highly similar to Keratin, type II cytoskeletal 6B  | 9606 | 1 |
| Gene_Symbol=KRT6A cDNA FLJ53910, highly similar to Keratin, type II cytoskeletal | 9606 | 1 |
| Gene_Symbol=KRT5 cDNA FLJ54081, highly similar to Keratin, type II cytoskeletal  | 9606 | 1 |
| Gene_Symbol=KRT6A Keratin, type II cytoskeletal 6A                               | 9606 | 1 |
| Gene_Symbol=KRT6C Keratin, type II cytoskeletal 6C                               | 9606 | 1 |
| Gene_Symbol=KRT6B Keratin, type II cytoskeletal 6B                               | 9606 | 1 |
| Gene_Symbol=KRT2 Keratin, type II cytoskeletal 2 epidermal                       | 9606 | 1 |
| Gene_Symbol=NCBP1 Nuclear cap-binding protein subunit 1                          | 9606 | 1 |

| Name                                                                         | Species | Peptides(95) |
|------------------------------------------------------------------------------|---------|--------------|
| Gene_Symbol=TF Serotransferrin                                               | 9606    | 139          |
| Gene_Symbol=HSPA8 Isoform 1 of Heat shock cognate 71 kDa protein             | 9606    | 22           |
| Gene_Symbol=HSPA5 HSPA5 protein                                              | 9606    | 18           |
| Gene_Symbol=XRCC6 X-ray repair complementing defective repair in Chinese han | 9606    | 7            |
| Gene_Symbol=XRCC6 X-ray repair cross-complementing protein 6                 | 9606    | 7            |

|                                                                                |      |   |
|--------------------------------------------------------------------------------|------|---|
| Gene_Symbol=XRCC6 X-ray repair complementing defective repair in Chinese han   | 9606 | 6 |
| Gene_Symbol=MSN 68 kDa protein                                                 | 9606 | 5 |
| Gene_Symbol=MSN Moesin                                                         | 9606 | 5 |
| Gene_Symbol=HSP90AA1 Isoform 1 of Heat shock protein HSP 90-alpha              | 9606 | 5 |
| Gene_Symbol=HSP90AA1 Isoform 2 of Heat shock protein HSP 90-alpha              | 9606 | 5 |
| Gene_Symbol=XRCC5 X-ray repair cross-complementing protein 5                   | 9606 | 4 |
| Gene_Symbol=PRKCSH Glucosidase 2 subunit beta                                  | 9606 | 3 |
| Gene_Symbol=PRKCSH glucosidase 2 subunit beta isoform 2                        | 9606 | 3 |
| Gene_Symbol=PRKCSH cDNA FLJ59211, highly similar to Glucosidase 2 subunit be   | 9606 | 3 |
| Gene_Symbol=PRKCSH PRKCSH protein (Fragment)                                   | 9606 | 3 |
| Gene_Symbol=SPTBN1 Isoform Long of Spectrin beta chain, brain 1                | 9606 | 3 |
| Gene_Symbol=SPTBN1 Isoform 2 of Spectrin beta chain, brain 1                   | 9606 | 3 |
| Gene_Symbol=SPTBN1 Isoform Short of Spectrin beta chain, brain 1               | 9606 | 3 |
| Gene_Symbol=EZR 69 kDa protein                                                 | 9606 | 4 |
| Gene_Symbol=EZR Ezrin                                                          | 9606 | 4 |
| Gene_Symbol=PREP Prolyl endopeptidase                                          | 9606 | 2 |
| Gene_Symbol=DPYSL3 Dihydropyrimidinase-related protein 3                       | 9606 | 2 |
| Gene_Symbol=DPYSL3 Collapsin response mediator protein 4 long variant          | 9606 | 2 |
| Gene_Symbol=HSPA1B;HSPA1A Heat shock 70 kDa protein 1A/1B                      | 9606 | 4 |
| Gene_Symbol=HSPA1B;HSPA1A cDNA FLJ54392, highly similar to Heat shock 70 kl    | 9606 | 4 |
| Gene_Symbol=- cDNA FLJ56386, highly similar to Heat shock 70 kDa protein 1L    | 9606 | 4 |
| Gene_Symbol=HSPA1L 64 kDa protein                                              | 9606 | 4 |
| Gene_Symbol=- 64 kDa protein                                                   | 9606 | 4 |
| Gene_Symbol=- 64 kDa protein                                                   | 9606 | 4 |
| Gene_Symbol=HSPA1L Heat shock 70 kDa protein 1-like                            | 9606 | 4 |
| Gene_Symbol=HSPA1L Heat shock 70kDa protein 1-like variant                     | 9606 | 4 |
| Gene_Symbol=HSPA1B;HSPA1A cDNA FLJ54408, highly similar to Heat shock 70 kl    | 9606 | 4 |
| Gene_Symbol=HSPA1B;HSPA1A Putative uncharacterized protein HSPA1B              | 9606 | 4 |
| Gene_Symbol=HSPA1B;HSPA1A Putative uncharacterized protein ENSP000004103       | 9606 | 4 |
| Gene_Symbol=HSPA1L 25 kDa protein                                              | 9606 | 4 |
| Gene_Symbol=HSPA1B;HSPA1A cDNA FLJ53071, highly similar to Heat shock 70 kl    | 9606 | 3 |
| Gene_Symbol=F13A1 Coagulation factor XIII A chain                              | 9606 | 2 |
| Gene_Symbol=- cDNA FLJ53487, highly similar to Coagulation factor XIII A chain | 9606 | 2 |
| Gene_Symbol=F13A1 Coagulation factor XIII, A1 polypeptide                      | 9606 | 1 |
| Gene_Symbol=F13A1 Coagulation factor XIII, A1 polypeptide                      | 9606 | 1 |
| Gene_Symbol=ECM1 Isoform 4 of Extracellular matrix protein 1                   | 9606 | 1 |
| Gene_Symbol=ECM1 Isoform 1 of Extracellular matrix protein 1                   | 9606 | 1 |
| Gene_Symbol=ECM1 Isoform 2 of Extracellular matrix protein 1                   | 9606 | 1 |
| Gene_Symbol=ECM1 Isoform 3 of Extracellular matrix protein 1                   | 9606 | 1 |
| Gene_Symbol=GBE1 1,4-alpha-glucan-branching enzyme                             | 9606 | 1 |
| Gene_Symbol=ALB 69 kDa protein                                                 | 9606 | 1 |
| Gene_Symbol=ALB Isoform 1 of Serum albumin                                     | 9606 | 1 |
| Gene_Symbol=ALB Putative uncharacterized protein ALB                           | 9606 | 1 |
| Gene_Symbol=ALB cDNA FLJ50830, highly similar to Serum albumin                 | 9606 | 1 |
| Gene_Symbol=ALB Protein                                                        | 9606 | 1 |
| Gene_Symbol=ALB 52 kDa protein                                                 | 9606 | 1 |
| Gene_Symbol=ALB Putative uncharacterized protein ALB                           | 9606 | 1 |
| Gene_Symbol=ALB Putative uncharacterized protein ALB                           | 9606 | 1 |
| Gene_Symbol=ALB Isoform 2 of Serum albumin                                     | 9606 | 1 |

|                                                                               |      |   |
|-------------------------------------------------------------------------------|------|---|
| Gene_Symbol=ALB ALB protein                                                   | 9606 | 1 |
| Gene_Symbol=GSN Isoform 1 of Gelsolin                                         | 9606 | 1 |
| Gene_Symbol=GSN gelsolin isoform c                                            | 9606 | 1 |
| Gene_Symbol=GSN Isoform 2 of Gelsolin                                         | 9606 | 1 |
| Gene_Symbol=GSN Gelsolin                                                      | 9606 | 1 |
| Gene_Symbol=HSP90AB1 Heat shock protein HSP 90-beta                           | 9606 | 4 |
| Gene_Symbol=HSP90AB3P Putative heat shock protein HSP 90-beta-3               | 9606 | 2 |
| Gene_Symbol=HSP90AB2P Similar to Heat shock protein HSP 90-beta               | 9606 | 2 |
| Gene_Symbol=- Putative uncharacterized protein ENSP00000371882                | 9606 | 2 |
| Gene_Symbol=HSPA9 cDNA FLJ51903, highly similar to Stress-70 protein, mitochc | 9606 | 1 |
| Gene_Symbol=HSPA9 Stress-70 protein, mitochondrial                            | 9606 | 1 |
| Gene_Symbol=ACTN1 Actinin alpha 1 isoform 3                                   | 9606 | 1 |
| Gene_Symbol=ACTN1 alpha-actinin-1 isoform c                                   | 9606 | 1 |
| Gene_Symbol=ACTN4 cDNA FLJ61380, highly similar to Alpha-actinin-4            | 9606 | 1 |
| Gene_Symbol=ACTN1 alpha-actinin-1 isoform a                                   | 9606 | 1 |
| Gene_Symbol=ACTN4 Alpha-actinin-4                                             | 9606 | 1 |
| Gene_Symbol=ACTN1 Alpha-actinin-1                                             | 9606 | 1 |
| Gene_Symbol=HNRNPU Isoform Long of Heterogeneous nuclear ribonucleoprote      | 9606 | 1 |
| Gene_Symbol=HNRNPU HNRPU protein                                              | 9606 | 1 |
| Gene_Symbol=HNRNPU cDNA FLJ54020, highly similar to Heterogeneous nuclear     | 9606 | 1 |
| Gene_Symbol=HNRNPU Isoform Short of Heterogeneous nuclear ribonucleoprote     | 9606 | 1 |
| Gene_Symbol=KRT8 Keratin, type II cytoskeletal 8                              | 9606 | 1 |
| Gene_Symbol=KRT8 27 kDa protein                                               | 9606 | 1 |
| Gene_Symbol=LOC728638 Similar to Keratin, type II cytoskeletal 8              | 9606 | 1 |
| Gene_Symbol=KRT8 17 kDa protein                                               | 9606 | 1 |
| Gene_Symbol=KRT8 25 kDa protein                                               | 9606 | 1 |
| Gene_Symbol=KRT8 14 kDa protein                                               | 9606 | 1 |
| Gene_Symbol=- Keratin-8-like protein 1                                        | 9606 | 1 |
| Gene_Symbol=FLJ46111 cDNA FLJ46111 fis, clone TEST12034913, moderately sim    | 9606 | 1 |
| Gene_Symbol=MCM7 Isoform 1 of DNA replication licensing factor MCM7           | 9606 | 1 |
| Gene_Symbol=MCM7 DNA replication licensing factor MCM7 isoform 2              | 9606 | 1 |
| Gene_Symbol=MCM7 Isoform 2 of DNA replication licensing factor MCM7           | 9606 | 1 |
| Gene_Symbol=MCM7 Putative uncharacterized protein MCM7                        | 9606 | 1 |
| Gene_Symbol=CANX Calnexin                                                     | 9606 | 1 |
| Gene_Symbol=CANX cDNA FLJ55574, highly similar to Calnexin                    | 9606 | 1 |
| Gene_Symbol=FAM129B niban-like protein 1 isoform 1                            | 9606 | 1 |
| Gene_Symbol=FAM129B Niban-like protein 1                                      | 9606 | 1 |
| Gene_Symbol=FAM129B FAM129B protein (Fragment)                                | 9606 | 1 |
| Gene_Symbol=NCBP1 Nuclear cap-binding protein subunit 1                       | 9606 | 1 |
| Gene_Symbol=ALCAM Protein                                                     | 9606 | 1 |
| Gene_Symbol=ALCAM cDNA, FLJ79012, highly similar to CD166 antigen             | 9606 | 1 |
| Gene_Symbol=ALCAM Isoform 2 of CD166 antigen                                  | 9606 | 1 |
| Gene_Symbol=ALCAM Activated leukocyte cell adhesion molecule soluble isoform  | 9606 | 1 |
| Gene_Symbol=ALCAM Isoform 1 of CD166 antigen                                  | 9606 | 1 |
| Gene_Symbol=ALCAM cDNA FLJ52980, highly similar to CD166 antigen              | 9606 | 1 |
| Gene_Symbol=GARS Putative uncharacterized protein GARS                        | 9606 | 1 |
| Gene_Symbol=GARS Glycyl-tRNA synthetase                                       | 9606 | 1 |
| Gene_Symbol=SLC3A2;LOC442497 Isoform 1 of 4F2 cell-surface antigen heavy ch   | 9606 | 1 |
| Gene_Symbol=SLC3A2;LOC442497 Isoform 3 of 4F2 cell-surface antigen heavy ch   | 9606 | 1 |

|                                                                             |      |   |
|-----------------------------------------------------------------------------|------|---|
| Gene_Symbol=SLC3A2;LOC442497 4F2 cell-surface antigen heavy chain isoform d | 9606 | 1 |
| Gene_Symbol=SLC3A2;LOC442497 4F2 cell-surface antigen heavy chain isoform b | 9606 | 1 |
| Gene_Symbol=SLC3A2;LOC442497 Isoform 4 of 4F2 cell-surface antigen heavy ch | 9606 | 1 |
| Gene_Symbol=SLC3A2;LOC442497 Isoform 2 of 4F2 cell-surface antigen heavy ch | 9606 | 1 |
| Gene_Symbol=PABPC1 cDNA FLJ37875 fis, clone BRSSN2018771, highly similar to | 9606 | 1 |
| Gene_Symbol=PABPC1 Isoform 1 of Polyadenylate-binding protein 1             | 9606 | 1 |
| Gene_Symbol=- cDNA FLJ59219, highly similar to Poly(A)-binding protein 1    | 9606 | 1 |
| Gene_Symbol=PABPC1 Isoform 2 of Polyadenylate-binding protein 1             | 9606 | 1 |
| Gene_Symbol=PABPC3 Polyadenylate-binding protein 3                          | 9606 | 1 |
| Gene_Symbol=PABPC1 36 kDa protein                                           | 9606 | 1 |

| Name                                                                               | Species | Peptides(95) |
|------------------------------------------------------------------------------------|---------|--------------|
| Gene_Symbol=TF Serotransferrin                                                     | 9606    | 57           |
| Gene_Symbol=HSPA1B;HSPA1A Heat shock 70 kDa protein 1A/1B                          | 9606    | 12           |
| Gene_Symbol=HSPA1B;HSPA1A cDNA FLJ54392, highly similar to Heat shock 70 kl        | 9606    | 12           |
| Gene_Symbol=ALB 69 kDa protein                                                     | 9606    | 10           |
| Gene_Symbol=ALB Isoform 1 of Serum albumin                                         | 9606    | 10           |
| Gene_Symbol=ALB Putative uncharacterized protein ALB                               | 9606    | 10           |
| Gene_Symbol=ALB cDNA FLJ50830, highly similar to Serum albumin                     | 9606    | 9            |
| Gene_Symbol=TKT Transketolase                                                      | 9606    | 10           |
| Gene_Symbol=TKT cDNA FLJ36348 fis, clone THYMU2007025, highly similar to TR        | 9606    | 10           |
| Gene_Symbol=TKT cDNA FLJ54957, highly similar to Transketolase                     | 9606    | 10           |
| Gene_Symbol=TKT cDNA FLJ53217, highly similar to Transketolase                     | 9606    | 10           |
| Gene_Symbol=HSPA8 Isoform 1 of Heat shock cognate 71 kDa protein                   | 9606    | 9            |
| Gene_Symbol=HSPA8 Isoform 2 of Heat shock cognate 71 kDa protein                   | 9606    | 8            |
| Gene_Symbol=HSPA8 54 kDa protein                                                   | 9606    | 8            |
| Gene_Symbol=HPX Hemopexin                                                          | 9606    | 6            |
| Gene_Symbol=RPA1 Replication protein A 70 kDa DNA-binding subunit                  | 9606    | 4            |
| Gene_Symbol=XRCC6 X-ray repair complementing defective repair in Chinese han       | 9606    | 2            |
| Gene_Symbol=XRCC6 X-ray repair cross-complementing protein 6                       | 9606    | 2            |
| Gene_Symbol=XRCC6 X-ray repair complementing defective repair in Chinese han       | 9606    | 2            |
| Gene_Symbol=XRCC6 cDNA FLJ31224 fis, clone KIDNE2004305, highly similar to A       | 9606    | 1            |
| Gene_Symbol=LCP1 Plastin-2                                                         | 9606    | 2            |
| Gene_Symbol=HSPD1 60 kDa heat shock protein, mitochondrial                         | 9606    | 3            |
| Gene_Symbol=HSPD1 cDNA FLJ51046, highly similar to 60 kDa heat shock proteir       | 9606    | 2            |
| Gene_Symbol=DPYSL3 Collapsin response mediator protein 4 long variant              | 9606    | 2            |
| Gene_Symbol=DPYSL3 Dihydropyrimidinase-related protein 3                           | 9606    | 2            |
| Gene_Symbol=NCL Nucleolin                                                          | 9606    | 3            |
| Gene_Symbol=NCL cDNA FLJ45706 fis, clone FEBRA2028457, highly similar to Nucleolin | 9606    | 3            |
| Gene_Symbol=LMNA Progerin                                                          | 9606    | 2            |
| Gene_Symbol=LMNA Isoform ADelta10 of Lamin-A/C                                     | 9606    | 2            |
| Gene_Symbol=LMNA Isoform C of Lamin-A/C                                            | 9606    | 2            |
| Gene_Symbol=LMNA Isoform A of Lamin-A/C                                            | 9606    | 2            |
| Gene_Symbol=LMNA 63 kDa protein                                                    | 9606    | 2            |
| Gene_Symbol=LMNA Rhabdomyosarcoma antigen MU-RMS-40.12                             | 9606    | 2            |
| Gene_Symbol=LMNA Lamin A/C                                                         | 9606    | 2            |
| Gene_Symbol=LMNA Lamin A/C                                                         | 9606    | 2            |
| Gene_Symbol=LMNA Lamin A/C                                                         | 9606    | 2            |



|                                                                                 |      |   |
|---------------------------------------------------------------------------------|------|---|
| Gene_Symbol=LMNA cDNA FLJ56081, highly similar to Lamin-A/C                     | 9606 | 2 |
| Gene_Symbol=HSPA5 HSPA5 protein                                                 | 9606 | 3 |
| Gene_Symbol=PLS1 Plastin-1                                                      | 9606 | 2 |
| Gene_Symbol=PLS3 plastin-3 isoform 2                                            | 9606 | 2 |
| Gene_Symbol=PLS3 Plastin-3                                                      | 9606 | 2 |
| Gene_Symbol=PLS1 Putative uncharacterized protein PLS1                          | 9606 | 1 |
| Gene_Symbol=PLS3 Protein                                                        | 9606 | 1 |
| Gene_Symbol=XRCC5 X-ray repair cross-complementing protein 5                    | 9606 | 1 |
| Gene_Symbol=XRCC5 12 kDa protein                                                | 9606 | 1 |
| Gene_Symbol=XRCC5 Putative uncharacterized protein XRCC5                        | 9606 | 1 |
| Gene_Symbol=PGM2 Phosphoglucomutase-2                                           | 9606 | 1 |
| Gene_Symbol=RPN1 Dolichyl-diphosphooligosaccharide--protein glycosyltransferase | 9606 | 1 |
| Gene_Symbol=RPN1 cDNA FLJ51740, highly similar to Dolichyl-diphosphooligosac    | 9606 | 1 |
| Gene_Symbol=LTA4H Isoform 1 of Leukotriene A-4 hydrolase                        | 9606 | 1 |
| Gene_Symbol=LTA4H Isoform 2 of Leukotriene A-4 hydrolase                        | 9606 | 1 |
| Gene_Symbol=STIP1 STIP1 protein                                                 | 9606 | 0 |
| Gene_Symbol=- cDNA FLJ54451, highly similar to Stress-induced-phosphoprotein    | 9606 | 0 |
| Gene_Symbol=STIP1 Stress-induced-phosphoprotein 1                               | 9606 | 0 |
| Gene_Symbol=SLC3A2;LOC442497 Isoform 1 of 4F2 cell-surface antigen heavy ch     | 9606 | 1 |
| Gene_Symbol=SLC3A2;LOC442497 Isoform 3 of 4F2 cell-surface antigen heavy ch     | 9606 | 1 |
| Gene_Symbol=SLC3A2;LOC442497 4F2 cell-surface antigen heavy chain isoform d     | 9606 | 1 |
| Gene_Symbol=SLC3A2;LOC442497 4F2 cell-surface antigen heavy chain isoform b     | 9606 | 1 |
| Gene_Symbol=SLC3A2;LOC442497 Isoform 4 of 4F2 cell-surface antigen heavy ch     | 9606 | 1 |
| Gene_Symbol=SLC3A2;LOC442497 Isoform 2 of 4F2 cell-surface antigen heavy ch     | 9606 | 1 |
| Gene_Symbol=ATIC Bifunctional purine biosynthesis protein PURH                  | 9606 | 1 |
| Gene_Symbol=ATIC cDNA FLJ75424, highly similar to Human AICAR formyltransfe     | 9606 | 1 |
| Gene_Symbol=ATIC Protein                                                        | 9606 | 1 |
| Gene_Symbol=ATIC 12 kDa protein                                                 | 9606 | 1 |
| Gene_Symbol=LGALS3BP Galectin-3-binding protein                                 | 9606 | 1 |
| Gene_Symbol=LGALS3BP cDNA FLJ53509, highly similar to Galectin-3-binding pro    | 9606 | 1 |
| Gene_Symbol=LGALS3BP cDNA FLJ54583, highly similar to Galectin-3-binding pro    | 9606 | 1 |
| Gene_Symbol=SLITRK6 Putative uncharacterized protein SLITRK6                    | 9606 | 1 |
| Gene_Symbol=SLITRK6 SLIT and NTRK-like protein 6                                | 9606 | 1 |
| Gene_Symbol=LIPG Isoform 1 of Endothelial lipase                                | 9606 | 1 |
| Gene_Symbol=LIPG Isoform 2 of Endothelial lipase                                | 9606 | 1 |
| Gene_Symbol=FARSB Phenylalanyl-tRNA synthetase beta chain                       | 9606 | 0 |
| Gene_Symbol=HNRNPL heterogeneous nuclear ribonucleoprotein L isoform b          | 9606 | 1 |
| Gene_Symbol=HNRNPL Heterogeneous nuclear ribonucleoprotein L                    | 9606 | 1 |
| Gene_Symbol=VAT1 Synaptic vesicle membrane protein VAT-1 homolog                | 9606 | 1 |

| Name                                                                          | Species | Peptides(95) |
|-------------------------------------------------------------------------------|---------|--------------|
| Gene_Symbol=PKM2 Isoform M2 of Pyruvate kinase isozymes M1/M2                 | 9606    | 28           |
| Gene_Symbol=TF Serotransferrin                                                | 9606    | 23           |
| Gene_Symbol=KRT8 Keratin, type II cytoskeletal 8                              | 9606    | 19           |
| Gene_Symbol=PDIA3 Protein disulfide-isomerase A3                              | 9606    | 14           |
| Gene_Symbol=ALDH1A1 Retinal dehydrogenase 1                                   | 9606    | 16           |
| Gene_Symbol=P4HB Protein disulfide-isomerase                                  | 9606    | 9            |
| Gene_Symbol=P4HB cDNA FLJ59430, highly similar to Protein disulfide-isomerase | 9606    | 8            |

|                                                                              |      |    |
|------------------------------------------------------------------------------|------|----|
| Gene_Symbol=GPI Glucose-6-phosphate isomerase                                | 9606 | 13 |
| Gene_Symbol=GPI Glucose-6-phosphate isomerase                                | 9606 | 13 |
| Gene_Symbol=GPI Glucose-6-phosphate isomerase                                | 9606 | 13 |
| Gene_Symbol=CCT2 T-complex protein 1 subunit beta                            | 9606 | 7  |
| Gene_Symbol=ATP5A1 ATP synthase subunit alpha, mitochondrial                 | 9606 | 7  |
| Gene_Symbol=ATP5A1 ATP synthase subunit alpha                                | 9606 | 6  |
| Gene_Symbol=DPYSL3 Collapsin response mediator protein 4 long variant        | 9606 | 7  |
| Gene_Symbol=DPYSL3 Dihydropyrimidinase-related protein 3                     | 9606 | 7  |
| Gene_Symbol=CCT8 T-complex protein 1 subunit theta                           | 9606 | 4  |
| Gene_Symbol=CCT8 59 kDa protein                                              | 9606 | 3  |
| Gene_Symbol=PPP2R1A cDNA FLJ56053, highly similar to Serine/threonine-prote  | 9606 | 5  |
| Gene_Symbol=PPP2R1A Serine/threonine-protein phosphatase 2A 65 kDa regula    | 9606 | 5  |
| Gene_Symbol=PPP2R1A cDNA FLJ56133, highly similar to Serine/threonine-prote  | 9606 | 5  |
| Gene_Symbol=PPP2R1A cDNA FLJ33169 fis, clone ADRGL2000384, highly similar t  | 9606 | 4  |
| Gene_Symbol=PPP2R1A cDNA FLJ34068 fis, clone FCBBF3001918, highly similar t  | 9606 | 4  |
| Gene_Symbol=HSPD1 60 kDa heat shock protein, mitochondrial                   | 9606 | 4  |
| Gene_Symbol=CAP1 Isoform 1 of Adenylyl cyclase-associated protein 1          | 9606 | 4  |
| Gene_Symbol=CAP1 Adenylyl cyclase-associated protein                         | 9606 | 4  |
| Gene_Symbol=CAP1 Adenylyl cyclase-associated protein                         | 9606 | 4  |
| Gene_Symbol=CAP1 Adenylyl cyclase-associated protein                         | 9606 | 4  |
| Gene_Symbol=CAP1 Adenylyl cyclase-associated protein                         | 9606 | 4  |
| Gene_Symbol=CAP1 Adenylyl cyclase-associated protein                         | 9606 | 4  |
| Gene_Symbol=CAP1 Adenylyl cyclase-associated protein                         | 9606 | 4  |
| Gene_Symbol=CAP1 Isoform 2 of Adenylyl cyclase-associated protein 1          | 9606 | 3  |
| Gene_Symbol=CCT7 T-complex protein 1 subunit eta isoform d                   | 9606 | 4  |
| Gene_Symbol=CCT7 T-complex protein 1 subunit eta                             | 9606 | 4  |
| Gene_Symbol=CCT7 Putative uncharacterized protein CCT7                       | 9606 | 3  |
| Gene_Symbol=CCT7 T-complex protein 1 subunit eta isoform c                   | 9606 | 3  |
| Gene_Symbol=CALR Calreticulin                                                | 9606 | 4  |
| Gene_Symbol=FSCN1 FSCN1 protein (Fragment)                                   | 9606 | 3  |
| Gene_Symbol=FSCN1 Fascin                                                     | 9606 | 3  |
| Gene_Symbol=CCT3 T-complex protein 1 subunit gamma                           | 9606 | 4  |
| Gene_Symbol=CCT3 T-complex protein 1 subunit gamma isoform b                 | 9606 | 4  |
| Gene_Symbol=CCT3 T-complex protein 1 subunit gamma isoform c                 | 9606 | 4  |
| Gene_Symbol=CCT5 cDNA FLJ54333, highly similar to T-complex protein 1 subuni | 9606 | 3  |
| Gene_Symbol=CCT5 57 kDa protein                                              | 9606 | 3  |
| Gene_Symbol=CCT5 T-complex protein 1 subunit epsilon                         | 9606 | 3  |
| Gene_Symbol=CCT5 cDNA, FLJ79275, highly similar to T-complex protein 1 subun | 9606 | 3  |
| Gene_Symbol=CCT5 cDNA FLJ58784, highly similar to T-complex protein 1 subuni | 9606 | 3  |
| Gene_Symbol=CCT5 cDNA FLJ52361, highly similar to T-complex protein 1 subuni | 9606 | 2  |
| Gene_Symbol=PRPF19 Pre-mRNA-processing factor 19                             | 9606 | 4  |
| Gene_Symbol=WDR1 cDNA FLJ45763 fis, clone N1ESE2000698, highly similar to V  | 9606 | 3  |
| Gene_Symbol=WDR1 Putative uncharacterized protein WDR1                       | 9606 | 3  |
| Gene_Symbol=WDR1 Isoform 1 of WD repeat-containing protein 1                 | 9606 | 3  |
| Gene_Symbol=CCT6A T-complex protein 1 subunit zeta isoform b                 | 9606 | 2  |
| Gene_Symbol=CCT6A T-complex protein 1 subunit zeta                           | 9606 | 2  |
| Gene_Symbol=UGP2 Putative uncharacterized protein UGP2                       | 9606 | 3  |
| Gene_Symbol=UGP2 cDNA FLJ56155, highly similar to UTP--glucose-1-phosphate   | 9606 | 3  |

|                                                                                 |      |   |
|---------------------------------------------------------------------------------|------|---|
| Gene_Symbol=UGP2 Isoform 2 of UTP--glucose-1-phosphate uridylyltransferase      | 9606 | 3 |
| Gene_Symbol=UGP2 Isoform 1 of UTP--glucose-1-phosphate uridylyltransferase      | 9606 | 3 |
| Gene_Symbol=UGP2 Putative uncharacterized protein UGP2                          | 9606 | 2 |
| Gene_Symbol=UGP2 Putative uncharacterized protein UGP2                          | 9606 | 2 |
| Gene_Symbol=UGP2 Putative uncharacterized protein UGP2                          | 9606 | 2 |
| Gene_Symbol=UGP2 Putative uncharacterized protein UGP2                          | 9606 | 2 |
| Gene_Symbol=UGP2 Putative uncharacterized protein UGP2                          | 9606 | 2 |
| Gene_Symbol=HNRNPK;MIR7-1 cDNA FLJ54552, highly similar to Heterogeneous        | 9606 | 3 |
| Gene_Symbol=HNRNPK;MIR7-1 Isoform 3 of Heterogeneous nuclear ribonucleop        | 9606 | 3 |
| Gene_Symbol=HNRNPK;MIR7-1 Heterogeneous nuclear ribonucleoprotein K             | 9606 | 3 |
| Gene_Symbol=HNRNPK;MIR7-1 Isoform 2 of Heterogeneous nuclear ribonucleop        | 9606 | 3 |
| Gene_Symbol=HNRNPK;MIR7-1 Isoform 1 of Heterogeneous nuclear ribonucleop        | 9606 | 3 |
| Gene_Symbol=HNRNPK;MIR7-1 Heterogeneous nuclear ribonucleoprotein K             | 9606 | 2 |
| Gene_Symbol=TCP1 T-complex protein 1 subunit alpha                              | 9606 | 2 |
| Gene_Symbol=TCP1 T-complex protein 1 subunit alpha isoform b                    | 9606 | 2 |
| Gene_Symbol=PTBP1 Isoform 2 of Polypyrimidine tract-binding protein 1           | 9606 | 2 |
| Gene_Symbol=PTBP1 polypyrimidine tract-binding protein 1 isoform a              | 9606 | 2 |
| Gene_Symbol=PTBP1 Isoform 1 of Polypyrimidine tract-binding protein 1           | 9606 | 2 |
| Gene_Symbol=PTBP1 Polypyrimidine tract-binding protein 1 isoform c variant (Fr  | 9606 | 1 |
| Gene_Symbol=HPX Hemopexin                                                       | 9606 | 2 |
| Gene_Symbol=CES1 Isoform 2 of Liver carboxylesterase 1                          | 9606 | 2 |
| Gene_Symbol=CES1 carboxylesterase 1 isoform c precursor                         | 9606 | 2 |
| Gene_Symbol=CES1 Isoform 1 of Liver carboxylesterase 1                          | 9606 | 2 |
| Gene_Symbol=NASP Isoform 3 of Nuclear autoantigenic sperm protein               | 9606 | 2 |
| Gene_Symbol=NASP Isoform 1 of Nuclear autoantigenic sperm protein               | 9606 | 2 |
| Gene_Symbol=NASP Isoform 2 of Nuclear autoantigenic sperm protein               | 9606 | 2 |
| Gene_Symbol=NASP Nuclear autoantigenic sperm protein                            | 9606 | 1 |
| Gene_Symbol=NASP Nuclear autoantigenic sperm protein                            | 9606 | 1 |
| Gene_Symbol=NUCB1 cDNA FLJ52898, highly similar to Nucleobindin-1               | 9606 | 2 |
| Gene_Symbol=NUCB1 Nucleobindin-1                                                | 9606 | 2 |
| Gene_Symbol=NUCB1 Protein                                                       | 9606 | 2 |
| Gene_Symbol=NUCB1 Protein                                                       | 9606 | 2 |
| Gene_Symbol=NUCB1 Putative uncharacterized protein NUCB1                        | 9606 | 1 |
| Gene_Symbol=NUCB1 Putative uncharacterized protein NUCB1                        | 9606 | 1 |
| Gene_Symbol=NUCB1 Putative uncharacterized protein NUCB1                        | 9606 | 1 |
| Gene_Symbol=PSMD3 26S proteasome non-ATPase regulatory subunit 3                | 9606 | 2 |
| Gene_Symbol=HNRNPR heterogeneous nuclear ribonucleoprotein R isoform 3          | 9606 | 1 |
| Gene_Symbol=HNRNPR Isoform 2 of Heterogeneous nuclear ribonucleoprotein R       | 9606 | 1 |
| Gene_Symbol=HNRNPR 71 kDa protein                                               | 9606 | 1 |
| Gene_Symbol=HNRNPR heterogeneous nuclear ribonucleoprotein R isoform 4          | 9606 | 1 |
| Gene_Symbol=HNRNPR cDNA FLJ53358, highly similar to Heterogeneous nuclear       | 9606 | 1 |
| Gene_Symbol=HNRNPR Isoform 1 of Heterogeneous nuclear ribonucleoprotein R       | 9606 | 1 |
| Gene_Symbol=PHGDH Phosphoglycerate dehydrogenase                                | 9606 | 1 |
| Gene_Symbol=PHGDH D-3-phosphoglycerate dehydrogenase                            | 9606 | 1 |
| Gene_Symbol=- Chaperonin Cpn60/TCP-1 family protein                             | 9606 | 1 |
| Gene_Symbol=ILK-2;CCT4 T-complex protein 1 subunit delta                        | 9606 | 1 |
| Gene_Symbol=ILK-2;CCT4 T-complex protein 1 subunit delta                        | 9606 | 1 |
| Gene_Symbol=SF3A3 cDNA FLJ58737, highly similar to Splicing factor 3A subunit : | 9606 | 1 |
| Gene_Symbol=SF3A3 Splicing factor 3A subunit 3                                  | 9606 | 1 |

|                                                                              |      |    |
|------------------------------------------------------------------------------|------|----|
| Gene_Symbol=CPNE3 Copine-3                                                   | 9606 | 1  |
| Gene_Symbol=ALB Protein                                                      | 9606 | 1  |
| Gene_Symbol=ALB 52 kDa protein                                               | 9606 | 1  |
| Gene_Symbol=ALB cDNA FLJ50830, highly similar to Serum albumin               | 9606 | 1  |
| Gene_Symbol=ALB Putative uncharacterized protein ALB                         | 9606 | 1  |
| Gene_Symbol=ALB Isoform 1 of Serum albumin                                   | 9606 | 1  |
| Gene_Symbol=ALB Putative uncharacterized protein ALB                         | 9606 | 1  |
| Gene_Symbol=ALB 69 kDa protein                                               | 9606 | 1  |
| Gene_Symbol=ALB Putative uncharacterized protein ALB                         | 9606 | 1  |
| Gene_Symbol=ALB Isoform 2 of Serum albumin                                   | 9606 | 1  |
| Gene_Symbol=ALB ALB protein                                                  | 9606 | 1  |
| Gene_Symbol=TUBA1B Tubulin alpha-1B chain                                    | 9606 | 1  |
| Gene_Symbol=- Putative uncharacterized protein ENSP00000351411               | 9606 | 1  |
| Gene_Symbol=TUBA1B cDNA FLJ60097, highly similar to Tubulin alpha-ubiquitou: | 9606 | 1  |
| Gene_Symbol=TUBA1C 29 kDa protein                                            | 9606 | 1  |
| Gene_Symbol=TUBA1C cDNA FLJ55956, highly similar to Tubulin alpha-6 chain    | 9606 | 1  |
| Gene_Symbol=TUBA1C Tubulin alpha-1C chain                                    | 9606 | 1  |
| Gene_Symbol=TUBA4A cDNA FLJ58687, highly similar to Tubulin alpha-4 chain    | 9606 | 1  |
| Gene_Symbol=TUBA4A Putative uncharacterized protein TUBA4A                   | 9606 | 1  |
| Gene_Symbol=TUBA4A Tubulin alpha-4A chain                                    | 9606 | 1  |
| Gene_Symbol=TUBA8 Putative uncharacterized protein DKFZp686L04275 (Fragme    | 9606 | 1  |
| Gene_Symbol=- Putative uncharacterized protein ENSP00000403894               | 9606 | 1  |
| Gene_Symbol=TUBA4A;TUBA1B Putative uncharacterized protein TUBA4A            | 9606 | 1  |
| Gene_Symbol=TUBA1B TUBA1B protein                                            | 9606 | 1  |
| Gene_Symbol=TUBA8 cDNA FLJ32385 fis, clone SKMUS1000110, highly similar to   | 9606 | 1  |
| Gene_Symbol=TUBA8 Putative uncharacterized protein TUBA8                     | 9606 | 1  |
| Gene_Symbol=TUBA8 Tubulin alpha-8 chain                                      | 9606 | 1  |
| Gene_Symbol=TUBA4B Putative tubulin-like protein alpha-4B                    | 9606 | 1  |
| Gene_Symbol=CPE Carboxypeptidase E precursor                                 | 9606 | 1  |
| Gene_Symbol=CPE 16 kDa protein                                               | 9606 | 1  |
| Gene_Symbol=CPE 18 kDa protein                                               | 9606 | 1  |
| Gene_Symbol=CPE Putative uncharacterized protein CPE                         | 9606 | 1  |
| Gene_Symbol=API5 apoptosis inhibitor 5 isoform a                             | 9606 | 0  |
| Gene_Symbol=API5 Isoform 1 of Apoptosis inhibitor 5                          | 9606 | 0  |
| Gene_Symbol=API5 Isoform 2 of Apoptosis inhibitor 5                          | 9606 | 0  |
| Gene_Symbol=API5 Isoform 3 of Apoptosis inhibitor 5                          | 9606 | 0  |
| Gene_Symbol=TROVE2 60 kDa SS-A/Ro ribonucleoprotein isoform 1                | 9606 | 1  |
| Gene_Symbol=TROVE2 60 kDa SS-A/Ro ribonucleoprotein isoform 3                | 9606 | 1  |
| Gene_Symbol=TROVE2 60 kDa SS-A/Ro ribonucleoprotein isoform 4                | 9606 | 1  |
| Gene_Symbol=TROVE2 Isoform Long of 60 kDa SS-A/Ro ribonucleoprotein          | 9606 | 1  |
| Gene_Symbol=TROVE2 Isoform Short of 60 kDa SS-A/Ro ribonucleoprotein         | 9606 | 1  |
| Gene_Symbol=PKM2 66 kDa protein                                              | 9606 | 25 |
| Gene_Symbol=PKM2 Isoform M1 of Pyruvate kinase isozymes M1/M2                | 9606 | 25 |
| Gene_Symbol=PKM2 Pyruvate kinase                                             | 9606 | 23 |
| Gene_Symbol=PKM2 Pyruvate kinase                                             | 9606 | 16 |
| Gene_Symbol=KRT1 Keratin, type II cytoskeletal 1                             | 9606 | 3  |
| Gene_Symbol=CAP1 Adenylyl cyclase-associated protein                         | 9606 | 2  |
| Gene_Symbol=TXNRD1 cDNA, FLJ92557, highly similar to Homo sapiens thioredo:  | 9606 | 1  |
| Gene_Symbol=TXNRD1 Isoform 6 of Thioredoxin reductase 1, cytoplasmic         | 9606 | 1  |

|                                                                                  |      |   |
|----------------------------------------------------------------------------------|------|---|
| Gene_Symbol=TXNRD1 Isoform 1 of Thioredoxin reductase 1, cytoplasmic             | 9606 | 1 |
| Gene_Symbol=TXNRD1 Isoform 2 of Thioredoxin reductase 1, cytoplasmic             | 9606 | 1 |
| Gene_Symbol=TXNRD1 Isoform 4 of Thioredoxin reductase 1, cytoplasmic             | 9606 | 1 |
| Gene_Symbol=TXNRD1 Isoform 3 of Thioredoxin reductase 1, cytoplasmic             | 9606 | 1 |
| Gene_Symbol=TXNRD1 Isoform 5 of Thioredoxin reductase 1, cytoplasmic             | 9606 | 1 |
| Gene_Symbol=IMPDH2 Inosine-5'-monophosphate dehydrogenase 2                      | 9606 | 1 |
| Gene_Symbol=IMPDH2 Protein                                                       | 9606 | 1 |
| Gene_Symbol=IMPDH2 Inosine monophosphate dehydrogenase type II                   | 9606 | 1 |
| Gene_Symbol=DDX5 cDNA FLJ59357, highly similar to Probable ATP-dependent R       | 9606 | 1 |
| Gene_Symbol=DDX5 Probable ATP-dependent RNA helicase DDX5                        | 9606 | 1 |
| Gene_Symbol=DDX17 Putative uncharacterized protein DDX17                         | 9606 | 1 |
| Gene_Symbol=DDX17 Putative uncharacterized protein DDX17                         | 9606 | 1 |
| Gene_Symbol=DDX17 probable ATP-dependent RNA helicase DDX17 isoform 3            | 9606 | 1 |
| Gene_Symbol=DDX17 Isoform 4 of Probable ATP-dependent RNA helicase DDX17         | 9606 | 1 |
| Gene_Symbol=DDX17 cDNA FLJ58652, highly similar to Probable ATP-dependent        | 9606 | 1 |
| Gene_Symbol=DDX17 Isoform 2 of Probable ATP-dependent RNA helicase DDX17         | 9606 | 1 |
| Gene_Symbol=DDX17 Isoform 3 of Probable ATP-dependent RNA helicase DDX17         | 9606 | 1 |
| Gene_Symbol=SLC1A5 Neutral amino acid transporter B(0)                           | 9606 | 1 |
| Gene_Symbol=HARS 55 kDa protein                                                  | 9606 | 1 |
| Gene_Symbol=HARS 50 kDa protein                                                  | 9606 | 1 |
| Gene_Symbol=HARS cDNA FLJ58554, highly similar to Histidyl-tRNA synthetase       | 9606 | 1 |
| Gene_Symbol=HARS Histidyl-tRNA synthetase, cytoplasmic                           | 9606 | 1 |
| Gene_Symbol=HARS Putative uncharacterized protein HARS                           | 9606 | 1 |
| Gene_Symbol=HARS cDNA FLJ58562, highly similar to Histidyl-tRNA synthetase       | 9606 | 1 |
| Gene_Symbol=HARS cDNA FLJ53703, highly similar to Histidyl-tRNA synthetase       | 9606 | 1 |
| Gene_Symbol=HARS cDNA FLJ59476, highly similar to Histidyl-tRNA synthetase       | 9606 | 1 |
| Gene_Symbol=PRCP lysosomal Pro-X carboxypeptidase isoform 2 preproprotein        | 9606 | 1 |
| Gene_Symbol=PRCP Lysosomal Pro-X carboxypeptidase                                | 9606 | 1 |
| Gene_Symbol=NPTX1 Neuronal pentraxin-1                                           | 9606 | 1 |
| Gene_Symbol=KRT6C 58 kDa protein                                                 | 9606 | 2 |
| Gene_Symbol=KRT6C cDNA, FLJ93744, highly similar to Homo sapiens keratin 6E      | 9606 | 2 |
| Gene_Symbol=KRT6C Keratin, type II cytoskeletal 6C                               | 9606 | 2 |
| Gene_Symbol=KRT6A 58 kDa protein                                                 | 9606 | 2 |
| Gene_Symbol=KRT6A cDNA FLJ53910, highly similar to Keratin, type II cytoskeletal | 9606 | 2 |
| Gene_Symbol=KRT6A Keratin, type II cytoskeletal 6A                               | 9606 | 2 |
| Gene_Symbol=KRT6B Keratin, type II cytoskeletal 6B                               | 9606 | 2 |
| Gene_Symbol=KRT5 cDNA FLJ54081, highly similar to Keratin, type II cytoskeletal  | 9606 | 2 |
| Gene_Symbol=KRT5 Keratin, type II cytoskeletal 5                                 | 9606 | 2 |
| Gene_Symbol=KRT75 65 kDa protein                                                 | 9606 | 1 |
| Gene_Symbol=KRT75 Keratin, type II cytoskeletal 75                               | 9606 | 1 |
| Gene_Symbol=- cDNA FLJ60647, highly similar to Keratin, type II cytoskeletal 6B  | 9606 | 1 |
| Gene_Symbol=KRT79 Keratin, type II cytoskeletal 79                               | 9606 | 1 |
| Gene_Symbol=KRT2 Keratin, type II cytoskeletal 2 epidermal                       | 9606 | 1 |
| Gene_Symbol=LOC100294459;IGHV4-31;IGHG1;LOC100290146 Putative unchara            | 9606 | 1 |
| Gene_Symbol=IGHG3 Protein                                                        | 9606 | 1 |
| Gene_Symbol=LOC100294459;IGHV4-31;IGHG1;LOC100290146 cDNA FLJ78387               | 9606 | 1 |
| Gene_Symbol=IGHG3 Ig gamma-3 chain C region                                      | 9606 | 1 |
| Gene_Symbol=LOC100294459;IGHV4-31;IGHG1;LOC100290146 Putative unchara            | 9606 | 1 |
| Gene_Symbol=LOC100294459;IGHV4-31;IGHG1;LOC100290146 IGH@ protein                | 9606 | 1 |

|                                                                       |      |   |
|-----------------------------------------------------------------------|------|---|
| Gene_Symbol=LOC100294459;IGHV4-31;IGHG1;LOC100290146 Putative unchara | 9606 | 1 |
| Gene_Symbol=LOC100294459;IGHV4-31;IGHG1;LOC100290146 Anti-RhD monocl  | 9606 | 1 |
| Gene_Symbol=LOC100294459;IGHV4-31;IGHG1;LOC100290146 Putative unchara | 9606 | 1 |
| Gene_Symbol=LOC100294459;IGHV4-31;IGHG1;LOC100290146 44 kDa protein   | 9606 | 1 |
| Gene_Symbol=LOC100294459;IGHV4-31;IGHG1;LOC100290146 Putative unchara | 9606 | 1 |
| Gene_Symbol=LOC100294459;IGHV4-31;IGHG1;LOC100290146 Putative unchara | 9606 | 1 |
| Gene_Symbol=LOC100294459;IGHV4-31;IGHG1;LOC100290146 Putative unchara | 9606 | 1 |
| Gene_Symbol=IGHM Putative uncharacterized protein DKFZp686I15212      | 9606 | 1 |
| Gene_Symbol=LOC100294459;IGHV4-31;IGHG1;LOC100290146 Putative unchara | 9606 | 1 |
| Gene_Symbol=IGHM FLJ00385 protein (Fragment)                          | 9606 | 1 |
| Gene_Symbol=SARS Seryl-tRNA synthetase                                | 9606 | 1 |
| Gene_Symbol=SARS Seryl-tRNA synthetase, cytoplasmic                   | 9606 | 1 |

| Name                                                                          | Species | Peptides(95) |
|-------------------------------------------------------------------------------|---------|--------------|
| Gene_Symbol=TF Serotransferrin                                                | 9606    | 22           |
| Gene_Symbol=TUBB2C Tubulin beta-2C chain                                      | 9606    | 23           |
| Gene_Symbol=ENO1 Isoform alpha-enolase of Alpha-enolase                       | 9606    | 19           |
| Gene_Symbol=TUBA1A Tubulin alpha-1A chain                                     | 9606    | 18           |
| Gene_Symbol=KRT8 Keratin, type II cytoskeletal 8                              | 9606    | 13           |
| Gene_Symbol=EEF1A1 Elongation factor 1-alpha 1                                | 9606    | 9            |
| Gene_Symbol=EEF1A1P5;EEF1A1 Putative elongation factor 1-alpha-like 3         | 9606    | 8            |
| Gene_Symbol=ATP5B ATP synthase subunit beta, mitochondrial                    | 9606    | 10           |
| Gene_Symbol=GDI2 Rab GDP dissociation inhibitor beta                          | 9606    | 11           |
| Gene_Symbol=GDI2 cDNA FLJ60299, highly similar to Rab GDP dissociation inhibi | 9606    | 11           |
| Gene_Symbol=EEF1G;TUT1 Elongation factor 1-gamma                              | 9606    | 5            |
| Gene_Symbol=TUT1;EEF1G cDNA FLJ56389, highly similar to Elongation factor 1-ξ | 9606    | 4            |
| Gene_Symbol=CNDP2 Isoform 1 of Cytosolic non-specific dipeptidase             | 9606    | 6            |
| Gene_Symbol=KRT18 Keratin, type I cytoskeletal 18                             | 9606    | 5            |
| Gene_Symbol=RUVBL1 Isoform 1 of RuvB-like 1                                   | 9606    | 6            |
| Gene_Symbol=HPX Hemopexin                                                     | 9606    | 5            |
| Gene_Symbol=SERPINF1 Pigment epithelium-derived factor                        | 9606    | 5            |
| Gene_Symbol=PGD 6-phosphogluconate dehydrogenase, decarboxylating             | 9606    | 4            |
| Gene_Symbol=RCC2 Protein RCC2                                                 | 9606    | 5            |
| Gene_Symbol=RBBP4 46 kDa protein                                              | 9606    | 4            |
| Gene_Symbol=RBBP4 Histone-binding protein RBBP4                               | 9606    | 4            |
| Gene_Symbol=RBBP4 histone-binding protein RBBP4 isoform b                     | 9606    | 3            |
| Gene_Symbol=NAP1L1 cDNA FLJ60539, highly similar to Nucleosome assembly pi    | 9606    | 5            |
| Gene_Symbol=NAP1L1 cDNA FLJ30458 fis, clone BRACE2009421, highly similar to   | 9606    | 5            |
| Gene_Symbol=NAP1L1 Nucleosome assembly protein 1-like 1                       | 9606    | 5            |
| Gene_Symbol=NAP1L1 cDNA FLJ16112 fis, clone 3NB692001853, highly similar tc   | 9606    | 4            |
| Gene_Symbol=TUBB Tubulin, beta                                                | 9606    | 20           |
| Gene_Symbol=TUBB cDNA FLJ56903, highly similar to Tubulin beta-7 chain        | 9606    | 17           |
| Gene_Symbol=- cDNA FLJ53063, highly similar to Tubulin beta-7 chain           | 9606    | 13           |
| Gene_Symbol=TUBB cDNA FLJ53012, highly similar to Tubulin beta-7 chain        | 9606    | 9            |
| Gene_Symbol=PSMD5 cDNA FLJ52877, highly similar to 26S proteasome non-ATP     | 9606    | 3            |
| Gene_Symbol=PSMD5 26S proteasome non-ATPase regulatory subunit 5              | 9606    | 3            |
| Gene_Symbol=RUVBL2 RuvB-like 2                                                | 9606    | 3            |
| Gene_Symbol=HSP90AB1 Heat shock protein HSP 90-beta                           | 9606    | 3            |

|                                                                              |      |    |
|------------------------------------------------------------------------------|------|----|
| Gene_Symbol=GSS Glutathione synthetase                                       | 9606 | 3  |
| Gene_Symbol=GSS Glutathione synthetase                                       | 9606 | 2  |
| Gene_Symbol=ADSS Adenylosuccinate synthetase isozyme 2                       | 9606 | 3  |
| Gene_Symbol=SSB SS-B/La protein                                              | 9606 | 3  |
| Gene_Symbol=SSB Lupus La protein                                             | 9606 | 3  |
| Gene_Symbol=CALR Calreticulin                                                | 9606 | 1  |
| Gene_Symbol=LMNA Progerin                                                    | 9606 | 2  |
| Gene_Symbol=LMNA Isoform ADelta10 of Lamin-A/C                               | 9606 | 2  |
| Gene_Symbol=LMNA Isoform C of Lamin-A/C                                      | 9606 | 2  |
| Gene_Symbol=LMNA Isoform A of Lamin-A/C                                      | 9606 | 2  |
| Gene_Symbol=LMNA Rhabdomyosarcoma antigen MU-RMS-40.12                       | 9606 | 2  |
| Gene_Symbol=LMNA Lamin A/C                                                   | 9606 | 2  |
| Gene_Symbol=LMNA 63 kDa protein                                              | 9606 | 2  |
| Gene_Symbol=LMNA cDNA FLJ56081, highly similar to Lamin-A/C                  | 9606 | 2  |
| Gene_Symbol=LMNA Lamin A/C                                                   | 9606 | 2  |
| Gene_Symbol=LMNA Lamin A/C                                                   | 9606 | 2  |
| Gene_Symbol=TUBB2B Tubulin beta-2B chain                                     | 9606 | 21 |
| Gene_Symbol=TUBB2A Tubulin beta-2A chain                                     | 9606 | 21 |
| Gene_Symbol=FH Isoform Cytoplasmic of Fumarate hydratase, mitochondrial      | 9606 | 2  |
| Gene_Symbol=FH Isoform Mitochondrial of Fumarate hydratase, mitochondrial    | 9606 | 2  |
| Gene_Symbol=ALDH1A1 Retinal dehydrogenase 1                                  | 9606 | 2  |
| Gene_Symbol=ALDH1A1 Aldehyde dehydrogenase 1 family, member A1               | 9606 | 2  |
| Gene_Symbol=ALDH1A1 Aldehyde dehydrogenase 1 family, member A1               | 9606 | 2  |
| Gene_Symbol=ALDH1A1 Aldehyde dehydrogenase 1 family, member A1               | 9606 | 2  |
| Gene_Symbol=ALDH1A1 cDNA FLJ50286, highly similar to Retinal dehydrogenase   | 9606 | 1  |
| Gene_Symbol=TUBA1B Tubulin alpha-1B chain                                    | 9606 | 18 |
| Gene_Symbol=TUBA1B cDNA FLJ60097, highly similar to Tubulin alpha-ubiquitous | 9606 | 18 |
| Gene_Symbol=TUBA1C Tubulin alpha-1C chain                                    | 9606 | 16 |
| Gene_Symbol=TUBA1B TUBA1B protein                                            | 9606 | 16 |
| Gene_Symbol=TUBA1C cDNA FLJ55956, highly similar to Tubulin alpha-6 chain    | 9606 | 15 |
| Gene_Symbol=TUBA4A cDNA FLJ58687, highly similar to Tubulin alpha-4 chain    | 9606 | 12 |
| Gene_Symbol=TUBA4A Tubulin alpha-4A chain                                    | 9606 | 12 |
| Gene_Symbol=TUBA8 Putative uncharacterized protein DKFZp686L04275 (Fragment) | 9606 | 10 |
| Gene_Symbol=TUBA8 Putative uncharacterized protein TUBA8                     | 9606 | 10 |
| Gene_Symbol=TUBA8 Tubulin alpha-8 chain                                      | 9606 | 10 |
| Gene_Symbol=TUBA8 cDNA FLJ32385 fis, clone SKMUS1000110, highly similar to   | 9606 | 10 |
| Gene_Symbol=TUBA1C 29 kDa protein                                            | 9606 | 12 |
| Gene_Symbol=- Putative uncharacterized protein ENSP00000351411               | 9606 | 9  |
| Gene_Symbol=TUBA4A;TUBA1B Putative uncharacterized protein TUBA4A            | 9606 | 5  |
| Gene_Symbol=TUBA4A Putative uncharacterized protein TUBA4A                   | 9606 | 5  |
| Gene_Symbol=- Putative uncharacterized protein ENSP00000403894               | 9606 | 3  |
| Gene_Symbol=TUBA4B Putative tubulin-like protein alpha-4B                    | 9606 | 3  |
| Gene_Symbol=DEK 14 kDa protein                                               | 9606 | 2  |
| Gene_Symbol=DEK Protein DEK                                                  | 9606 | 2  |
| Gene_Symbol=DEK Protein                                                      | 9606 | 2  |
| Gene_Symbol=DEK protein DEK isoform 2                                        | 9606 | 2  |
| Gene_Symbol=DEK cDNA FLJ53031, highly similar to Protein DEK                 | 9606 | 2  |
| Gene_Symbol=DEK 17 kDa protein                                               | 9606 | 1  |
| Gene_Symbol=HNRNPH1 cDNA FLJ54533, highly similar to Heterogeneous nuclea    | 9606 | 2  |

|                                                                                |      |    |
|--------------------------------------------------------------------------------|------|----|
| Gene_Symbol=HNRNPH1 51 kDa protein                                             | 9606 | 2  |
| Gene_Symbol=HNRNPH1 Heterogeneous nuclear ribonucleoprotein H                  | 9606 | 2  |
| Gene_Symbol=HNRNPH1 19 kDa protein                                             | 9606 | 1  |
| Gene_Symbol=HNRNPH1 24 kDa protein                                             | 9606 | 1  |
| Gene_Symbol=HNRNPH2 cDNA FLJ57964, highly similar to Heterogeneous nuclea      | 9606 | 1  |
| Gene_Symbol=HNRNPH2 Heterogeneous nuclear ribonucleoprotein H2                 | 9606 | 1  |
| Gene_Symbol=CORO1C Coronin-1C                                                  | 9606 | 1  |
| Gene_Symbol=CORO1C Coronin-1C_i3 protein                                       | 9606 | 1  |
| Gene_Symbol=CORO1C cDNA FLJ50992, highly similar to Coronin-1C                 | 9606 | 1  |
| Gene_Symbol=MUTED;TXNDC5 thioredoxin domain-containing protein 5 isoform       | 9606 | 1  |
| Gene_Symbol=MUTED TXNDC5 protein                                               | 9606 | 1  |
| Gene_Symbol=TXNDC5 Thioredoxin domain-containing protein 5                     | 9606 | 1  |
| Gene_Symbol=HSP90AA1 Isoform 1 of Heat shock protein HSP 90-alpha              | 9606 | 3  |
| Gene_Symbol=HSP90AA1 Hsp89-alpha-delta-N                                       | 9606 | 3  |
| Gene_Symbol=HSP90AA1 Isoform 2 of Heat shock protein HSP 90-alpha              | 9606 | 3  |
| Gene_Symbol=DLD cDNA FLJ56112, highly similar to Dihydrolipoyl dehydrogenase   | 9606 | 1  |
| Gene_Symbol=DLD Dihydrolipoyl dehydrogenase                                    | 9606 | 1  |
| Gene_Symbol=DLD Dihydrolipoyl dehydrogenase, mitochondrial                     | 9606 | 1  |
| Gene_Symbol=MC1R;TUBB3 Tubulin, beta, 4                                        | 9606 | 13 |
| Gene_Symbol=TUBB3 Tubulin beta-3 chain                                         | 9606 | 13 |
| Gene_Symbol=TUBB3;MC1R cDNA FLJ77784                                           | 9606 | 12 |
| Gene_Symbol=TUBB6 TUBB6 protein                                                | 9606 | 10 |
| Gene_Symbol=TUBB3 35 kDa protein                                               | 9606 | 9  |
| Gene_Symbol=KRT1 Keratin, type II cytoskeletal 1                               | 9606 | 2  |
| Gene_Symbol=ETF1 Eukaryotic translation termination factor 1, isoform CRA_b    | 9606 | 1  |
| Gene_Symbol=ETF1 cDNA FLJ56175, highly similar to Eukaryotic peptide chain rel | 9606 | 1  |
| Gene_Symbol=ETF1 Eukaryotic peptide chain release factor subunit 1             | 9606 | 1  |
| Gene_Symbol=ETF1 13 kDa protein                                                | 9606 | 1  |
| Gene_Symbol=ETF1 10 kDa protein                                                | 9606 | 1  |
| Gene_Symbol=SERPINH1 cDNA FLJ52569, highly similar to Collagen-binding prote   | 9606 | 1  |
| Gene_Symbol=SERPINH1 Serpin H1                                                 | 9606 | 1  |
| Gene_Symbol=SERBP1 Isoform 3 of Plasminogen activator inhibitor 1 RNA-bindin   | 9606 | 1  |
| Gene_Symbol=SERBP1 Isoform 2 of Plasminogen activator inhibitor 1 RNA-bindin   | 9606 | 1  |
| Gene_Symbol=SERBP1 Isoform 4 of Plasminogen activator inhibitor 1 RNA-bindin   | 9606 | 1  |
| Gene_Symbol=SERBP1 SERPINE1 mRNA binding protein 1, isoform CRA_d              | 9606 | 1  |
| Gene_Symbol=PGK1 Phosphoglycerate kinase                                       | 9606 | 1  |
| Gene_Symbol=PGK1 Phosphoglycerate kinase                                       | 9606 | 1  |
| Gene_Symbol=PGK1 Phosphoglycerate kinase 1                                     | 9606 | 1  |
| Gene_Symbol=PKM2 Pyruvate kinase                                               | 9606 | 1  |
| Gene_Symbol=PKM2 Pyruvate kinase                                               | 9606 | 1  |
| Gene_Symbol=PKM2 Isoform M2 of Pyruvate kinase isozymes M1/M2                  | 9606 | 1  |
| Gene_Symbol=PKM2 66 kDa protein                                                | 9606 | 1  |
| Gene_Symbol=PKM2 Pyruvate kinase                                               | 9606 | 1  |
| Gene_Symbol=LOC652797 similar to pyruvate kinase, muscle                       | 9606 | 1  |
| Gene_Symbol=PKM2 Pyruvate kinase                                               | 9606 | 1  |
| Gene_Symbol=PKM2 Isoform M1 of Pyruvate kinase isozymes M1/M2                  | 9606 | 1  |
| Gene_Symbol=VASP Vasodilator-stimulated phosphoprotein                         | 9606 | 1  |
| Gene_Symbol=GPI Glucose-6-phosphate isomerase                                  | 9606 | 1  |
| Gene_Symbol=GPI Glucose-6-phosphate isomerase                                  | 9606 | 1  |



|                                                                            |      |   |
|----------------------------------------------------------------------------|------|---|
| Gene_Symbol=GPI Glucose-6-phosphate isomerase                              | 9606 | 1 |
| Gene_Symbol=ALDH3A1 Putative uncharacterized protein ALDH3A1               | 9606 | 1 |
| Gene_Symbol=ALDH3A1 Putative uncharacterized protein ALDH3A1               | 9606 | 1 |
| Gene_Symbol=ALDH3A1 Putative uncharacterized protein ALDH3A1               | 9606 | 1 |
| Gene_Symbol=ALDH3A1 ALDH3A1 protein (Fragment)                             | 9606 | 1 |
| Gene_Symbol=ALDH3A1 Aldehyde dehydrogenase, dimeric NADP-preferring        | 9606 | 1 |
| Gene_Symbol=PDIA6 Isoform 1 of Protein disulfide-isomerase A6              | 9606 | 1 |
| Gene_Symbol=PDIA6 Isoform 2 of Protein disulfide-isomerase A6              | 9606 | 1 |
| Gene_Symbol=RPL4 cDNA FLJ50996, highly similar to 60S ribosomal protein L4 | 9606 | 1 |
| Gene_Symbol=RPL4 60S ribosomal protein L4                                  | 9606 | 1 |
| Gene_Symbol=RPL4 11 kDa protein                                            | 9606 | 1 |
| Gene_Symbol=HNRNPK;MIR7-1 cDNA FLJ54552, highly similar to Heterogeneous   | 9606 | 1 |
| Gene_Symbol=HNRNPK;MIR7-1 Isoform 3 of Heterogeneous nuclear ribonucleop   | 9606 | 1 |
| Gene_Symbol=HNRNPK;MIR7-1 Heterogeneous nuclear ribonucleoprotein K        | 9606 | 1 |
| Gene_Symbol=HNRNPK;MIR7-1 Isoform 2 of Heterogeneous nuclear ribonucleop   | 9606 | 1 |
| Gene_Symbol=HNRNPK;MIR7-1 Isoform 1 of Heterogeneous nuclear ribonucleop   | 9606 | 1 |
| Gene_Symbol=HNRNPK;MIR7-1 Heterogeneous nuclear ribonucleoprotein K        | 9606 | 1 |
| Gene_Symbol=LOC389634 Conserved hypothetical protein                       | 9606 | 1 |
| Gene_Symbol=PSMC3 26S protease regulatory subunit 6A                       | 9606 | 1 |

| Name                                                                         | Species | Peptides(95) |
|------------------------------------------------------------------------------|---------|--------------|
| Gene_Symbol=ENO1 Isoform alpha-enolase of Alpha-enolase                      | 9606    | 20           |
| Gene_Symbol=KRT19 Keratin, type I cytoskeletal 19                            | 9606    | 9            |
| Gene_Symbol=KRT8 Keratin, type II cytoskeletal 8                             | 9606    | 9            |
| Gene_Symbol=PGK1 Phosphoglycerate kinase 1                                   | 9606    | 12           |
| Gene_Symbol=ACTG1 cDNA FLJ57283, highly similar to Actin, cytoplasmic 2      | 9606    | 8            |
| Gene_Symbol=ACTB Beta actin variant (Fragment)                               | 9606    | 8            |
| Gene_Symbol=ACTG1 Actin, cytoplasmic 2                                       | 9606    | 8            |
| Gene_Symbol=ACTB Actin, cytoplasmic 1                                        | 9606    | 8            |
| Gene_Symbol=ACTB;ACTG1 cDNA FLJ52842, highly similar to Actin, cytoplasmic 1 | 9606    | 7            |
| Gene_Symbol=SERPINF1 Pigment epithelium-derived factor                       | 9606    | 6            |
| Gene_Symbol=AHCY Adenosylhomocysteinase                                      | 9606    | 6            |
| Gene_Symbol=GSN cDNA FLJ53327, highly similar to Gelsolin                    | 9606    | 5            |
| Gene_Symbol=GSN gelsolin isoform c                                           | 9606    | 5            |
| Gene_Symbol=GSN Isoform 2 of Gelsolin                                        | 9606    | 5            |
| Gene_Symbol=GSN Isoform 1 of Gelsolin                                        | 9606    | 5            |
| Gene_Symbol=PA2G4 Proliferation-associated protein 2G4                       | 9606    | 3            |
| Gene_Symbol=PA2G4 PA2G4 protein (Fragment)                                   | 9606    | 3            |
| Gene_Symbol=PA2G4 41 kDa protein                                             | 9606    | 3            |
| Gene_Symbol=PAICS multifunctional protein ADE2 isoform 1                     | 9606    | 3            |
| Gene_Symbol=PAICS Multifunctional protein ADE2                               | 9606    | 3            |
| Gene_Symbol=PAICS Phosphoribosylaminoimidazole-succinocarboxamide syntha:    | 9606    | 2            |
| Gene_Symbol=TUBA1B Tubulin alpha-1B chain                                    | 9606    | 4            |
| Gene_Symbol=TUBA1B cDNA FLJ60097, highly similar to Tubulin alpha-ubiquitou: | 9606    | 4            |
| Gene_Symbol=TUBA1C Tubulin alpha-1C chain                                    | 9606    | 4            |
| Gene_Symbol=TUBA1C cDNA FLJ55956, highly similar to Tubulin alpha-6 chain    | 9606    | 3            |
| Gene_Symbol=TUBA1C 29 kDa protein                                            | 9606    | 3            |
| Gene_Symbol=TUBA1A Tubulin alpha-1A chain                                    | 9606    | 3            |

|                                                                                |      |   |
|--------------------------------------------------------------------------------|------|---|
| Gene_Symbol=SNORA63;MIR1248;SNORA4;SNORA81;SNORD2;EIF4A2 Isoform 2             | 9606 | 4 |
| Gene_Symbol=SNORA63;MIR1248;SNORA4;SNORA81;SNORD2;EIF4A2 Isoform 1             | 9606 | 4 |
| Gene_Symbol=SNORA63;MIR1248;SNORA4;SNORA81;SNORD2;EIF4A2 41 kDa pr             | 9606 | 3 |
| Gene_Symbol=EEF1A1P5;EEF1A1 Putative elongation factor 1-alpha-like 3          | 9606 | 3 |
| Gene_Symbol=EEF1A1 Elongation factor 1-alpha 1                                 | 9606 | 3 |
| Gene_Symbol=EEF1A1 Elongation factor 1-alpha                                   | 9606 | 3 |
| Gene_Symbol=- Elongation factor 1-alpha                                        | 9606 | 3 |
| Gene_Symbol=CS Citrate synthase, mitochondrial                                 | 9606 | 4 |
| Gene_Symbol=ERP44 Endoplasmic reticulum resident protein 44                    | 9606 | 4 |
| Gene_Symbol=PSMD11 Proteasome 26S non-ATPase subunit 11 variant (Fragmer       | 9606 | 4 |
| Gene_Symbol=NAP1L1 cDNA FLJ60539, highly similar to Nucleosome assembly pi     | 9606 | 4 |
| Gene_Symbol=NAP1L1 cDNA FLJ30458 fis, clone BRACE2009421, highly similar to    | 9606 | 4 |
| Gene_Symbol=NAP1L1 Nucleosome assembly protein 1-like 1                        | 9606 | 4 |
| Gene_Symbol=NAP1L1 cDNA FLJ16112 fis, clone 3NB692001853, highly similar to    | 9606 | 3 |
| Gene_Symbol=SNORD84;BAT1 Isoform 1 of Spliceosome RNA helicase BAT1            | 9606 | 2 |
| Gene_Symbol=SNORD84;BAT1 Isoform 2 of Spliceosome RNA helicase BAT1            | 9606 | 2 |
| Gene_Symbol=DDX39 ATP-dependent RNA helicase DDX39                             | 9606 | 2 |
| Gene_Symbol=DDX39 cDNA FLJ55484, highly similar to ATP-dependent RNA helic     | 9606 | 2 |
| Gene_Symbol=SNORD84;BAT1 HLA-B associated transcript 1                         | 9606 | 2 |
| Gene_Symbol=SNORD84;BAT1 cDNA FLJ53073, highly similar to Spliceosome RNA      | 9606 | 2 |
| Gene_Symbol=SNORD84;BAT1 HLA-B associated transcript 1                         | 9606 | 2 |
| Gene_Symbol=SNORD84;BAT1 HLA-B associated transcript 1                         | 9606 | 1 |
| Gene_Symbol=TF Serotransferrin                                                 | 9606 | 4 |
| Gene_Symbol=WIF1 cDNA FLJ54458, highly similar to Wnt inhibitory factor 1      | 9606 | 3 |
| Gene_Symbol=EIF3F Eukaryotic translation initiation factor 3 subunit F         | 9606 | 2 |
| Gene_Symbol=EIF3F cDNA FLJ36192 fis, clone TESTI2027450, highly similar to Eul | 9606 | 2 |
| Gene_Symbol=FEN1 Flap endonuclease 1                                           | 9606 | 2 |
| Gene_Symbol=TUBB Tubulin, beta                                                 | 9606 | 2 |
| Gene_Symbol=TUBB Tubulin, beta                                                 | 9606 | 2 |
| Gene_Symbol=TUBB2C Tubulin beta-2C chain                                       | 9606 | 2 |
| Gene_Symbol=TUBB2A cDNA, FLJ93005, highly similar to Homo sapiens tubulin, t   | 9606 | 2 |
| Gene_Symbol=TUBB2B Tubulin beta-2B chain                                       | 9606 | 2 |
| Gene_Symbol=TUBB2A Tubulin beta-2A chain                                       | 9606 | 2 |
| Gene_Symbol=MC1R;TUBB3 Tubulin, beta, 4                                        | 9606 | 1 |
| Gene_Symbol=TUBB6 TUBB6 protein                                                | 9606 | 1 |
| Gene_Symbol=TUBB3;MC1R cDNA FLJ77784                                           | 9606 | 1 |
| Gene_Symbol=TUBB3 Tubulin beta-3 chain                                         | 9606 | 1 |
| Gene_Symbol=TUBB cDNA FLJ56903, highly similar to Tubulin beta-7 chain         | 9606 | 1 |
| Gene_Symbol=TUBB6 43 kDa protein                                               | 9606 | 1 |
| Gene_Symbol=TUBB6 46 kDa protein                                               | 9606 | 1 |
| Gene_Symbol=MIR220B cDNA FLJ55189, highly similar to Tubulin beta-4 chain      | 9606 | 1 |
| Gene_Symbol=TUBB6 cDNA FLJ52712, highly similar to Tubulin beta-6 chain        | 9606 | 1 |
| Gene_Symbol=TUBB4 Tubulin beta-4 chain                                         | 9606 | 1 |
| Gene_Symbol=TUBB cDNA FLJ53012, highly similar to Tubulin beta-7 chain         | 9606 | 1 |
| Gene_Symbol=TUBB6 cDNA FLJ11352 fis, clone HEMBA1000020, highly similar to     | 9606 | 1 |
| Gene_Symbol=TUBB4;MIR220B cDNA FLJ53341, highly similar to Tubulin beta-4 c    | 9606 | 1 |
| Gene_Symbol=- cDNA FLJ53063, highly similar to Tubulin beta-7 chain            | 9606 | 1 |
| Gene_Symbol=TUBBP5 Putative tubulin beta chain-like protein ENSP0000029037     | 9606 | 1 |
| Gene_Symbol=TUBB4 27 kDa protein                                               | 9606 | 1 |

|                                                                               |      |   |
|-------------------------------------------------------------------------------|------|---|
| Gene_Symbol=TUBB4Q;TUBB8 tubulin beta-8 chain isoform 2                       | 9606 | 1 |
| Gene_Symbol=MIR220B cDNA FLJ52536, highly similar to Tubulin beta-4 chain     | 9606 | 1 |
| Gene_Symbol=- 20 kDa protein                                                  | 9606 | 1 |
| Gene_Symbol=TUBB8;TUBB4Q Tubulin, beta 8, isoform CRA_c                       | 9606 | 1 |
| Gene_Symbol=TUBB8 Tubulin beta-8 chain                                        | 9606 | 1 |
| Gene_Symbol=- Tubulin beta-8 chain B                                          | 9606 | 1 |
| Gene_Symbol=PDIA6 Isoform 2 of Protein disulfide-isomerase A6                 | 9606 | 2 |
| Gene_Symbol=PDIA6 Isoform 1 of Protein disulfide-isomerase A6                 | 9606 | 2 |
| Gene_Symbol=OLA1 47 kDa protein                                               | 9606 | 2 |
| Gene_Symbol=OLA1 cDNA FLJ58890, highly similar to GTP-binding protein PTD00   | 9606 | 2 |
| Gene_Symbol=OLA1 Isoform 1 of Obg-like ATPase 1                               | 9606 | 2 |
| Gene_Symbol=OLA1 Isoform 3 of Obg-like ATPase 1                               | 9606 | 2 |
| Gene_Symbol=OLA1 Protein                                                      | 9606 | 1 |
| Gene_Symbol=LMNA Progerin                                                     | 9606 | 1 |
| Gene_Symbol=LMNA Isoform ADelta10 of Lamin-A/C                                | 9606 | 1 |
| Gene_Symbol=LMNA Isoform C of Lamin-A/C                                       | 9606 | 1 |
| Gene_Symbol=LMNA Isoform A of Lamin-A/C                                       | 9606 | 1 |
| Gene_Symbol=LMNA Rhabdomyosarcoma antigen MU-RMS-40.12                        | 9606 | 1 |
| Gene_Symbol=LMNA Lamin A/C                                                    | 9606 | 1 |
| Gene_Symbol=LMNA Lamin A/C                                                    | 9606 | 1 |
| Gene_Symbol=LMNA 63 kDa protein                                               | 9606 | 1 |
| Gene_Symbol=LMNA cDNA FLJ56081, highly similar to Lamin-A/C                   | 9606 | 1 |
| Gene_Symbol=LMNA Lamin A/C                                                    | 9606 | 1 |
| Gene_Symbol=KRT18 Keratin, type I cytoskeletal 18                             | 9606 | 1 |
| Gene_Symbol=KRT18 18 kDa protein                                              | 9606 | 1 |
| Gene_Symbol=IDH2 Isocitrate dehydrogenase [NADP], mitochondrial               | 9606 | 1 |
| Gene_Symbol=HNRNPF Heterogeneous nuclear ribonucleoprotein F                  | 9606 | 1 |
| Gene_Symbol=EIF4A1 Eukaryotic initiation factor 4A-I                          | 9606 | 3 |
| Gene_Symbol=EIF4A1 cDNA FLJ57766, moderately similar to Eukaryotic initiation | 9606 | 2 |
| Gene_Symbol=- HCG1793424, isoform CRA_a                                       | 9606 | 1 |
| Gene_Symbol=MUTED TXNDC5 protein                                              | 9606 | 1 |
| Gene_Symbol=TXNDC5 Thioredoxin domain-containing protein 5                    | 9606 | 1 |
| Gene_Symbol=MUTED;TXNDC5 thioredoxin domain-containing protein 5 isoform      | 9606 | 1 |
| Gene_Symbol=ASS1 Argininosuccinate synthase                                   | 9606 | 1 |
| Gene_Symbol=ASS1 cDNA FLJ54252, highly similar to Argininosuccinate synthase  | 9606 | 1 |
| Gene_Symbol=UQCRC2 Cytochrome b-c1 complex subunit 2, mitochondrial           | 9606 | 1 |
| Gene_Symbol=GGH Gamma-glutamyl hydrolase                                      | 9606 | 1 |
| Gene_Symbol=MAT2A S-adenosylmethionine synthetase                             | 9606 | 1 |
| Gene_Symbol=MAT2A cDNA FLJ51001, highly similar to S-adenosylmethionine sy    | 9606 | 1 |
| Gene_Symbol=MAT2A S-adenosylmethionine synthase isoform type-2                | 9606 | 1 |
| Gene_Symbol=MAT2A cDNA FLJ51180, moderately similar to S-adenosylmethioni     | 9606 | 1 |
| Gene_Symbol=MAT1A S-adenosylmethionine synthase isoform type-1                | 9606 | 1 |
| Gene_Symbol=- cDNA FLJ50123                                                   | 9606 | 1 |
| Gene_Symbol=C1orf58 BRO1 domain-containing protein BROX                       | 9606 | 1 |
| Gene_Symbol=MIR1181;CDC37 Hsp90 co-chaperone Cdc37                            | 9606 | 1 |
| Gene_Symbol=LOC100290215 hypothetical protein XP_002346994                    | 9606 | 1 |
| Gene_Symbol=ACTR3B Isoform 2 of Actin-related protein 3B                      | 9606 | 1 |
| Gene_Symbol=ACTR3B Isoform 1 of Actin-related protein 3B                      | 9606 | 1 |
| Gene_Symbol=- cDNA FLJ52216, highly similar to Actin-like protein 3           | 9606 | 1 |

|                                                                         |      |   |
|-------------------------------------------------------------------------|------|---|
| Gene_Symbol=ACTR3 Actin-related protein 3                               | 9606 | 1 |
| Gene_Symbol=CKB Creatine kinase B-type                                  | 9606 | 1 |
| Gene_Symbol=CKB cDNA FLJ52237, highly similar to Creatine kinase B-type | 9606 | 1 |
| Gene_Symbol=ILF2 12 kDa protein                                         | 9606 | 1 |
| Gene_Symbol=ILF2 Interleukin enhancer-binding factor 2                  | 9606 | 1 |
| Gene_Symbol=RTN4 Isoform 1 of Reticulon-4                               | 9606 | 1 |
| Gene_Symbol=RTN4 Isoform 5 of Reticulon-4                               | 9606 | 1 |
| Gene_Symbol=RTN4 Isoform 2 of Reticulon-4                               | 9606 | 1 |

| Name                                                                        | Species | Peptides(95) |
|-----------------------------------------------------------------------------|---------|--------------|
| Gene_Symbol=ACTG1 cDNA FLJ57283, highly similar to Actin, cytoplasmic 2     | 9606    | 32           |
| Gene_Symbol=ACTG1 Actin, cytoplasmic 2                                      | 9606    | 32           |
| Gene_Symbol=ACTB Actin, cytoplasmic 1                                       | 9606    | 32           |
| Gene_Symbol=ALDOA 45 kDa protein                                            | 9606    | 17           |
| Gene_Symbol=ALDOA Fructose-bisphosphate aldolase A                          | 9606    | 17           |
| Gene_Symbol=CKB Creatine kinase B-type                                      | 9606    | 13           |
| Gene_Symbol=CKB cDNA FLJ52237, highly similar to Creatine kinase B-type     | 9606    | 12           |
| Gene_Symbol=TF Serotransferrin                                              | 9606    | 8            |
| Gene_Symbol=ILF2 Interleukin enhancer-binding factor 2                      | 9606    | 9            |
| Gene_Symbol=GSN gelsolin isoform c                                          | 9606    | 8            |
| Gene_Symbol=GSN Isoform 2 of Gelsolin                                       | 9606    | 8            |
| Gene_Symbol=GSN Isoform 1 of Gelsolin                                       | 9606    | 8            |
| Gene_Symbol=KRT19 Keratin, type I cytoskeletal 19                           | 9606    | 5            |
| Gene_Symbol=SERPINB6 Serpin B6                                              | 9606    | 5            |
| Gene_Symbol=SERPINB6 Serpin B6                                              | 9606    | 5            |
| Gene_Symbol=GGH Gamma-glutamyl hydrolase                                    | 9606    | 4            |
| Gene_Symbol=SERPINB1 Leukocyte elastase inhibitor                           | 9606    | 4            |
| Gene_Symbol=HNRNPA2B1 Putative uncharacterized protein HNRNPA2B1            | 9606    | 4            |
| Gene_Symbol=HNRNPA2B1 Isoform B1 of Heterogeneous nuclear ribonucleoprot    | 9606    | 4            |
| Gene_Symbol=HNRNPA2B1 Isoform A2 of Heterogeneous nuclear ribonucleoprot    | 9606    | 4            |
| Gene_Symbol=PRMT1 cDNA FLJ55610, highly similar to Protein arginine N-methy | 9606    | 4            |
| Gene_Symbol=PRMT1 Isoform 3 of Protein arginine N-methyltransferase 1       | 9606    | 4            |
| Gene_Symbol=PRMT1 protein arginine N-methyltransferase 1 isoform 3          | 9606    | 4            |
| Gene_Symbol=PRMT1 Isoform 2 of Protein arginine N-methyltransferase 1       | 9606    | 4            |
| Gene_Symbol=PRMT1 protein arginine N-methyltransferase 1 isoform 1          | 9606    | 4            |
| Gene_Symbol=PRMT1 cDNA FLJ60588, highly similar to Protein arginine N-methy | 9606    | 4            |
| Gene_Symbol=HNRNPD Putative uncharacterized protein HNRNPD                  | 9606    | 3            |
| Gene_Symbol=HNRNPD Isoform 4 of Heterogeneous nuclear ribonucleoprotein D   | 9606    | 3            |
| Gene_Symbol=HNRNPD Isoform 3 of Heterogeneous nuclear ribonucleoprotein D   | 9606    | 3            |
| Gene_Symbol=HNRNPD Isoform 2 of Heterogeneous nuclear ribonucleoprotein D   | 9606    | 3            |
| Gene_Symbol=HNRNPD Isoform 1 of Heterogeneous nuclear ribonucleoprotein D   | 9606    | 3            |
| Gene_Symbol=HNRNPD 30 kDa protein                                           | 9606    | 3            |
| Gene_Symbol=HNRNPD P37 AUF1                                                 | 9606    | 3            |
| Gene_Symbol=HNRNPK;MIR7-1 cDNA FLJ54552, highly similar to Heterogeneous    | 9606    | 3            |
| Gene_Symbol=HNRNPK;MIR7-1 Isoform 3 of Heterogeneous nuclear ribonucleop    | 9606    | 3            |
| Gene_Symbol=HNRNPK;MIR7-1 Heterogeneous nuclear ribonucleoprotein K         | 9606    | 3            |
| Gene_Symbol=HNRNPK;MIR7-1 Isoform 2 of Heterogeneous nuclear ribonucleop    | 9606    | 3            |
| Gene_Symbol=HNRNPK;MIR7-1 Isoform 1 of Heterogeneous nuclear ribonucleop    | 9606    | 3            |

|                                                                                                      |      |   |
|------------------------------------------------------------------------------------------------------|------|---|
| Gene_Symbol=HNRNPK;MIR7-1 Heterogeneous nuclear ribonucleoprotein K                                  | 9606 | 2 |
| Gene_Symbol=PTBP1 Isoform 2 of Polypyrimidine tract-binding protein 1                                | 9606 | 2 |
| Gene_Symbol=PTBP1 polypyrimidine tract-binding protein 1 isoform a                                   | 9606 | 2 |
| Gene_Symbol=PTBP1 Isoform 1 of Polypyrimidine tract-binding protein 1                                | 9606 | 2 |
| Gene_Symbol=KRT8 Keratin, type II cytoskeletal 8                                                     | 9606 | 3 |
| Gene_Symbol=KRT8 27 kDa protein                                                                      | 9606 | 3 |
| Gene_Symbol=LOC728638 Similar to Keratin, type II cytoskeletal 8                                     | 9606 | 3 |
| Gene_Symbol=- Keratin-8-like protein 1                                                               | 9606 | 2 |
| Gene_Symbol=GOT2 Aspartate aminotransferase, mitochondrial                                           | 9606 | 2 |
| Gene_Symbol=GOT2 cDNA FLJ55692, highly similar to Aspartate aminotransferase                         | 9606 | 2 |
| Gene_Symbol=PRKACA Isoform 1 of cAMP-dependent protein kinase catalytic subunit                      | 9606 | 2 |
| Gene_Symbol=PRKACA Isoform 2 of cAMP-dependent protein kinase catalytic subunit                      | 9606 | 2 |
| Gene_Symbol=PRKACB Isoform 1 of cAMP-dependent protein kinase catalytic subunit                      | 9606 | 1 |
| Gene_Symbol=PRKACB Isoform 3 of cAMP-dependent protein kinase catalytic subunit                      | 9606 | 1 |
| Gene_Symbol=PRKACB Isoform 4 of cAMP-dependent protein kinase catalytic subunit                      | 9606 | 1 |
| Gene_Symbol=PRKACB Isoform 7 of cAMP-dependent protein kinase catalytic subunit                      | 9606 | 1 |
| Gene_Symbol=PRKACB Isoform 5 of cAMP-dependent protein kinase catalytic subunit                      | 9606 | 1 |
| Gene_Symbol=PRKACB cDNA FLJ52554, highly similar to cAMP-dependent protein kinase catalytic subunit  | 9606 | 1 |
| Gene_Symbol=PRKACB cDNA, FLJ79014, highly similar to cAMP-dependent protein kinase catalytic subunit | 9606 | 1 |
| Gene_Symbol=PRKACB Isoform 2 of cAMP-dependent protein kinase catalytic subunit                      | 9606 | 1 |
| Gene_Symbol=PRKACB Putative uncharacterized protein PRKACB                                           | 9606 | 1 |
| Gene_Symbol=LMNA 63 kDa protein                                                                      | 9606 | 2 |
| Gene_Symbol=LMNA cDNA FLJ56081, highly similar to Lamin-A/C                                          | 9606 | 2 |
| Gene_Symbol=LMNA Progerin                                                                            | 9606 | 2 |
| Gene_Symbol=LMNA Lamin A/C                                                                           | 9606 | 2 |
| Gene_Symbol=LMNA Lamin A/C                                                                           | 9606 | 2 |
| Gene_Symbol=LMNA Isoform ADelta10 of Lamin-A/C                                                       | 9606 | 2 |
| Gene_Symbol=LMNA Isoform C of Lamin-A/C                                                              | 9606 | 2 |
| Gene_Symbol=LMNA Isoform A of Lamin-A/C                                                              | 9606 | 2 |
| Gene_Symbol=LMNA Rhabdomyosarcoma antigen MU-RMS-40.12                                               | 9606 | 1 |
| Gene_Symbol=LMNA Lamin A/C                                                                           | 9606 | 1 |
| Gene_Symbol=LMNA 28 kDa protein                                                                      | 9606 | 1 |
| Gene_Symbol=SNORD84;BAT1 Isoform 1 of Spliceosome RNA helicase BAT1                                  | 9606 | 1 |
| Gene_Symbol=SNORD84;BAT1 HLA-B associated transcript 1                                               | 9606 | 1 |
| Gene_Symbol=SNORD84;BAT1 Isoform 2 of Spliceosome RNA helicase BAT1                                  | 9606 | 1 |
| Gene_Symbol=DDX39 ATP-dependent RNA helicase DDX39                                                   | 9606 | 1 |
| Gene_Symbol=DDX39 cDNA FLJ55484, highly similar to ATP-dependent RNA helicase DDX39                  | 9606 | 1 |
| Gene_Symbol=SNORD84;BAT1 HLA-B associated transcript 1                                               | 9606 | 1 |
| Gene_Symbol=SNORD84;BAT1 HLA-B associated transcript 1                                               | 9606 | 1 |
| Gene_Symbol=SNORD84;BAT1 cDNA FLJ53073, highly similar to Spliceosome RNA helicase BAT1              | 9606 | 1 |
| Gene_Symbol=SNORD84;BAT1 HLA-B associated transcript 1                                               | 9606 | 1 |
| Gene_Symbol=SNORD84;BAT1 HLA-B associated transcript 1                                               | 9606 | 1 |
| Gene_Symbol=DDX39 DEAD (Asp-Glu-Ala-Asp) box polypeptide 39, isoform CRA_1                           | 9606 | 1 |
| Gene_Symbol=SET SET nuclear oncogene                                                                 | 9606 | 2 |
| Gene_Symbol=SET SET nuclear oncogene                                                                 | 9606 | 2 |
| Gene_Symbol=SET Putative uncharacterized protein SET                                                 | 9606 | 2 |
| Gene_Symbol=SET Isoform 2 of Protein SET                                                             | 9606 | 2 |
| Gene_Symbol=SET Isoform 1 of Protein SET                                                             | 9606 | 2 |
| Gene_Symbol=LOC646817 similar to SET translocation                                                   | 9606 | 2 |

|                                                                            |      |   |
|----------------------------------------------------------------------------|------|---|
| Gene_Symbol=HNRNPH1 cDNA FLJ54533, highly similar to Heterogeneous nuclea  | 9606 | 2 |
| Gene_Symbol=HNRNPH1 51 kDa protein                                         | 9606 | 2 |
| Gene_Symbol=HNRNPH1 Heterogeneous nuclear ribonucleoprotein H              | 9606 | 2 |
| Gene_Symbol=HNRNPH2 cDNA FLJ57964, highly similar to Heterogeneous nuclea  | 9606 | 1 |
| Gene_Symbol=HNRNPH2 Heterogeneous nuclear ribonucleoprotein H2             | 9606 | 1 |
| Gene_Symbol=HNRNPH1 24 kDa protein                                         | 9606 | 1 |
| Gene_Symbol=HNRNPH1 19 kDa protein                                         | 9606 | 1 |
| Gene_Symbol=HNRNPF Heterogeneous nuclear ribonucleoprotein F               | 9606 | 1 |
| Gene_Symbol=ANXA2 Isoform 1 of Annexin A2                                  | 9606 | 2 |
| Gene_Symbol=ANXA2 Isoform 2 of Annexin A2                                  | 9606 | 2 |
| Gene_Symbol=- cDNA FLJ59138, highly similar to Annexin A2                  | 9606 | 2 |
| Gene_Symbol=ANXA2 24 kDa protein                                           | 9606 | 2 |
| Gene_Symbol=ANXA2P2 Putative annexin A2-like protein                       | 9606 | 1 |
| Gene_Symbol=VIM Vimentin                                                   | 9606 | 1 |
| Gene_Symbol=VIM Vimentin                                                   | 9606 | 1 |
| Gene_Symbol=SMS Isoform 1 of Spermine synthase                             | 9606 | 1 |
| Gene_Symbol=SMS Protein                                                    | 9606 | 1 |
| Gene_Symbol=SMS Isoform 2 of Spermine synthase                             | 9606 | 1 |
| Gene_Symbol=SMS cDNA FLJ50114, highly similar to Spermine synthase         | 9606 | 1 |
| Gene_Symbol=PSMD6 Putative uncharacterized protein PSMD6                   | 9606 | 1 |
| Gene_Symbol=PSMD6 26S proteasome non-ATPase regulatory subunit 6           | 9606 | 1 |
| Gene_Symbol=PSMD6 34 kDa protein                                           | 9606 | 1 |
| Gene_Symbol=PSMD6 cDNA FLJ37740 fis, clone BRHIP2021870, highly similar to | 9606 | 1 |
| Gene_Symbol=PSMD6 Proteasome (Prosome, macropain) 26S subunit, non-ATPa    | 9606 | 1 |
| Gene_Symbol=PSMD6 9 kDa protein                                            | 9606 | 1 |
| Gene_Symbol=H2AFY Isoform 1 of Core histone macro-H2A.1                    | 9606 | 1 |
| Gene_Symbol=H2AFY Isoform 2 of Core histone macro-H2A.1                    | 9606 | 1 |
| Gene_Symbol=H2AFY Isoform 3 of Core histone macro-H2A.1                    | 9606 | 1 |
| Gene_Symbol=H2AFY2 Core histone macro-H2A.2                                | 9606 | 1 |
| Gene_Symbol=H2AFY 18 kDa protein                                           | 9606 | 1 |
| Gene_Symbol=SNORA63;MIR1248;SNORA4;SNORA81;SNORD2;EIF4A2 Isoform 2         | 9606 | 1 |
| Gene_Symbol=SNORA63;MIR1248;SNORA4;SNORA81;SNORD2;EIF4A2 Isoform 1         | 9606 | 1 |
| Gene_Symbol=SNORA63;MIR1248;SNORA4;SNORA81;SNORD2;EIF4A2 Eukaryotic        | 9606 | 1 |
| Gene_Symbol=SNORA63;MIR1248;SNORA4;SNORA81;SNORD2;EIF4A2 41 kDa pr         | 9606 | 1 |
| Gene_Symbol=SNORA63;MIR1248;SNORA4;SNORA81;SNORD2;EIF4A2 25 kDa pr         | 9606 | 1 |
| Gene_Symbol=SNORA63;MIR1248;SNORA4;SNORA81;SNORD2;EIF4A2 cDNA FLJ5         | 9606 | 1 |
| Gene_Symbol=SNORA63;MIR1248;SNORA4;SNORA81;SNORD2;EIF4A2 26 kDa pr         | 9606 | 1 |
| Gene_Symbol=SNORA63;MIR1248;SNORA4;SNORA81;SNORD2;EIF4A2 18 kDa pr         | 9606 | 1 |
| Gene_Symbol=SNORA63;MIR1248;SNORA4;SNORA81;SNORD2;EIF4A2 25 kDa pr         | 9606 | 1 |
| Gene_Symbol=ALDOC Fructose-bisphosphate aldolase                           | 9606 | 3 |
| Gene_Symbol=- Fructose-bisphosphate aldolase                               | 9606 | 2 |
| Gene_Symbol=ALDOC Fructose-bisphosphate aldolase                           | 9606 | 2 |
| Gene_Symbol=HNRNPAB 30 kDa protein                                         | 9606 | 2 |
| Gene_Symbol=HNRNPAB 36 kDa protein                                         | 9606 | 2 |
| Gene_Symbol=HNRNPAB 30 kDa protein                                         | 9606 | 2 |
| Gene_Symbol=HNRNPAB Putative uncharacterized protein HNRNPAB               | 9606 | 2 |
| Gene_Symbol=HNRNPAB Isoform 3 of Heterogeneous nuclear ribonucleoprotein . | 9606 | 2 |
| Gene_Symbol=HNRNPAB Isoform 2 of Heterogeneous nuclear ribonucleoprotein . | 9606 | 2 |
| Gene_Symbol=PSMD13 HSPC027                                                 | 9606 | 1 |

|                                                                                 |      |   |
|---------------------------------------------------------------------------------|------|---|
| Gene_Symbol=PSMD13 26S proteasome non-ATPase regulatory subunit 13 isoform      | 9606 | 1 |
| Gene_Symbol=SYNCRIP heterogeneous nuclear ribonucleoprotein Q isoform 5         | 9606 | 1 |
| Gene_Symbol=SYNCRIP Isoform 4 of Heterogeneous nuclear ribonucleoprotein Q      | 9606 | 1 |
| Gene_Symbol=SYNCRIP Isoform 3 of Heterogeneous nuclear ribonucleoprotein Q      | 9606 | 1 |
| Gene_Symbol=SYNCRIP Isoform 2 of Heterogeneous nuclear ribonucleoprotein Q      | 9606 | 1 |
| Gene_Symbol=SYNCRIP Isoform 1 of Heterogeneous nuclear ribonucleoprotein Q      | 9606 | 1 |
| Gene_Symbol=SYNCRIP SYNCRIP protein (Fragment)                                  | 9606 | 1 |
| Gene_Symbol=SYNCRIP heterogeneous nuclear ribonucleoprotein Q isoform 2         | 9606 | 1 |
| Gene_Symbol=- Elongation factor 1-alpha                                         | 9606 | 1 |
| Gene_Symbol=EEF1A2 Eukaryotic translation elongation factor 1 alpha 2 variant ( | 9606 | 1 |
| Gene_Symbol=EEF1A1P5;EEF1A1 Putative elongation factor 1-alpha-like 3           | 9606 | 1 |
| Gene_Symbol=EEF1A1 Elongation factor 1-alpha 1                                  | 9606 | 1 |
| Gene_Symbol=EEF1A1 Elongation factor 1-alpha                                    | 9606 | 1 |
| Gene_Symbol=EEF1A2 Elongation factor 1-alpha 2                                  | 9606 | 1 |
| Gene_Symbol=EEF1A1 EEF1A protein (Fragment)                                     | 9606 | 1 |
| Gene_Symbol=- Putative uncharacterized protein ENSP00000383298                  | 9606 | 1 |
| Gene_Symbol=HNRNPA1 Isoform 2 of Heterogeneous nuclear ribonucleoprotein ,      | 9606 | 1 |
| Gene_Symbol=HNRPA1L-2 Similar to Heterogeneous nuclear ribonucleoprotein A      | 9606 | 1 |
| Gene_Symbol=HNRPA1L3 Putative heterogeneous nuclear ribonucleoprotein A1-l      | 9606 | 1 |
| Gene_Symbol=HNRNPA1 Isoform A1-A of Heterogeneous nuclear ribonucleoproti       | 9606 | 1 |
| Gene_Symbol=HNRNPA1 Isoform A1-B of Heterogeneous nuclear ribonucleoproti       | 9606 | 1 |
| Gene_Symbol=HNRNPA1 16 kDa protein                                              | 9606 | 1 |
| Gene_Symbol=- 32 kDa protein                                                    | 9606 | 1 |
| Gene_Symbol=- Similar to Heterogeneous nuclear ribonucleoprotein A1 (Helix-de   | 9606 | 1 |
| Gene_Symbol=HNRNPA1 cDNA FLJ51586, moderately similar to Heterogeneous n        | 9606 | 1 |
| Gene_Symbol=- cDNA FLJ51587, highly similar to Heterogeneous nuclear ribonuc    | 9606 | 1 |
| Gene_Symbol=TUBA1B Tubulin alpha-1B chain                                       | 9606 | 1 |
| Gene_Symbol=- Putative uncharacterized protein ENSP00000351411                  | 9606 | 1 |
| Gene_Symbol=TUBA1B cDNA FLJ60097, highly similar to Tubulin alpha-ubiquitou     | 9606 | 1 |
| Gene_Symbol=TUBA1C 29 kDa protein                                               | 9606 | 1 |
| Gene_Symbol=TUBA1C cDNA FLJ55956, highly similar to Tubulin alpha-6 chain       | 9606 | 1 |
| Gene_Symbol=TUBA1C Tubulin alpha-1C chain                                       | 9606 | 1 |
| Gene_Symbol=TUBA4A cDNA FLJ58687, highly similar to Tubulin alpha-4 chain       | 9606 | 1 |
| Gene_Symbol=TUBA4A Putative uncharacterized protein TUBA4A                      | 9606 | 1 |
| Gene_Symbol=TUBA4A Tubulin alpha-4A chain                                       | 9606 | 1 |
| Gene_Symbol=TUBA8 Putative uncharacterized protein DKFZp686L04275 (Fragm        | 9606 | 1 |
| Gene_Symbol=TUBA8 cDNA FLJ32385 fis, clone SKMUS1000110, highly similar to      | 9606 | 1 |
| Gene_Symbol=TUBA8 Putative uncharacterized protein TUBA8                        | 9606 | 1 |
| Gene_Symbol=TUBA8 Tubulin alpha-8 chain                                         | 9606 | 1 |
| Gene_Symbol=- Putative uncharacterized protein ENSP00000403894                  | 9606 | 1 |
| Gene_Symbol=TUBA4A;TUBA1B Putative uncharacterized protein TUBA4A               | 9606 | 1 |
| Gene_Symbol=TUBA1B TUBA1B protein                                               | 9606 | 1 |
| Gene_Symbol=TUBA4B Putative tubulin-like protein alpha-4B                       | 9606 | 1 |
| Gene_Symbol=ALB 69 kDa protein                                                  | 9606 | 1 |
| Gene_Symbol=ALB Isoform 1 of Serum albumin                                      | 9606 | 1 |
| Gene_Symbol=ALB Putative uncharacterized protein ALB                            | 9606 | 1 |
| Gene_Symbol=ALB cDNA FLJ50830, highly similar to Serum albumin                  | 9606 | 1 |
| Gene_Symbol=ALB Protein                                                         | 9606 | 1 |
| Gene_Symbol=ALB 52 kDa protein                                                  | 9606 | 1 |

|                                                                              |      |    |
|------------------------------------------------------------------------------|------|----|
| Gene_Symbol=ALB Putative uncharacterized protein ALB                         | 9606 | 1  |
| Gene_Symbol=ALB ALB protein                                                  | 9606 | 1  |
| Gene_Symbol=ALB Putative uncharacterized protein ALB                         | 9606 | 1  |
| Gene_Symbol=ALB Isoform 2 of Serum albumin                                   | 9606 | 1  |
| Gene_Symbol=PSMD7 26S proteasome non-ATPase regulatory subunit 7             | 9606 | 1  |
| Gene_Symbol=PRDX2 cDNA FLJ60461, highly similar to Peroxiredoxin-2           | 9606 | 1  |
| Gene_Symbol=PRDX2 Peroxiredoxin-2                                            | 9606 | 1  |
| Gene_Symbol=PRDX2 Putative uncharacterized protein PRDX2                     | 9606 | 1  |
| Gene_Symbol=ACTB Beta actin variant (Fragment)                               | 9606 | 32 |
| Gene_Symbol=ACTB Actin, cytoplasmic 1                                        | 9606 | 32 |
| Gene_Symbol=ACTB;ACTG1 cDNA FLJ52842, highly similar to Actin, cytoplasmic 1 | 9606 | 27 |
| Gene_Symbol=ACTB 14 kDa protein                                              | 9606 | 15 |
| Gene_Symbol=ACTB Putative uncharacterized protein ACTB                       | 9606 | 13 |
| Gene_Symbol=ACTB Putative uncharacterized protein ACTB                       | 9606 | 13 |
| Gene_Symbol=ACTB Putative uncharacterized protein ACTB                       | 9606 | 8  |
| Gene_Symbol=CTSL2 Cathepsin L2                                               | 9606 | 1  |
| Gene_Symbol=CSNK2A1 Casein kinase II subunit alpha                           | 9606 | 1  |
| Gene_Symbol=CSNK2A1 Casein kinase 2 alpha isoform                            | 9606 | 1  |
| Gene_Symbol=CSNK2A1 CSNK2A1 protein                                          | 9606 | 1  |
| Gene_Symbol=CSNK2A1;CSNK2A1P HCG21984                                        | 9606 | 1  |
| Gene_Symbol=WARS tryptophanyl-tRNA synthetase, cytoplasmic isoform b         | 9606 | 1  |
| Gene_Symbol=WARS Isoform 1 of Tryptophanyl-tRNA synthetase, cytoplasmic      | 9606 | 1  |
| Gene_Symbol=MIR220B cDNA FLJ55189, highly similar to Tubulin beta-4 chain    | 9606 | 1  |
| Gene_Symbol=TUBB4 27 kDa protein                                             | 9606 | 1  |
| Gene_Symbol=TUBB2A cDNA, FLJ93005, highly similar to Homo sapiens tubulin, t | 9606 | 1  |
| Gene_Symbol=TUBB6 cDNA FLJ11352 fis, clone HEMBA1000020, highly similar to   | 9606 | 1  |
| Gene_Symbol=TUBB4;MIR220B cDNA FLJ53341, highly similar to Tubulin beta-4 c  | 9606 | 1  |
| Gene_Symbol=MIR220B cDNA FLJ52536, highly similar to Tubulin beta-4 chain    | 9606 | 1  |
| Gene_Symbol=TUBB cDNA FLJ56903, highly similar to Tubulin beta-7 chain       | 9606 | 1  |
| Gene_Symbol=- cDNA FLJ53063, highly similar to Tubulin beta-7 chain          | 9606 | 1  |
| Gene_Symbol=TUBB6 cDNA FLJ52712, highly similar to Tubulin beta-6 chain      | 9606 | 1  |
| Gene_Symbol=TUBB Tubulin, beta                                               | 9606 | 1  |
| Gene_Symbol=TUBB Tubulin, beta                                               | 9606 | 1  |
| Gene_Symbol=TUBB6 43 kDa protein                                             | 9606 | 1  |
| Gene_Symbol=TUBB6 46 kDa protein                                             | 9606 | 1  |
| Gene_Symbol=- Tubulin beta-8 chain B                                         | 9606 | 1  |
| Gene_Symbol=TUBB2B Tubulin beta-2B chain                                     | 9606 | 1  |
| Gene_Symbol=TUBB4 Tubulin beta-4 chain                                       | 9606 | 1  |
| Gene_Symbol=TUBB2A Tubulin beta-2A chain                                     | 9606 | 1  |
| Gene_Symbol=TUBB2C Tubulin beta-2C chain                                     | 9606 | 1  |
| Gene_Symbol=TUBB4Q;TUBB8 tubulin beta-8 chain isoform 2                      | 9606 | 1  |
| Gene_Symbol=- 20 kDa protein                                                 | 9606 | 1  |
| Gene_Symbol=TUBBP5 Putative tubulin beta chain-like protein ENSP0000029037   | 9606 | 1  |
| Gene_Symbol=TUBB8;TUBB4Q Tubulin, beta 8, isoform CRA_c                      | 9606 | 1  |
| Gene_Symbol=TUBB8 Tubulin beta-8 chain                                       | 9606 | 1  |
| Gene_Symbol=GAPDH Glyceraldehyde-3-phosphate dehydrogenase                   | 9606 | 1  |
| Gene_Symbol=GAPDH 32 kDa protein                                             | 9606 | 1  |
| Gene_Symbol=GAPDH Glyceraldehyde-3-phosphate dehydrogenase                   | 9606 | 1  |
| Gene_Symbol=GAPDH 39 kDa protein                                             | 9606 | 1  |



|                                                                              |      |   |
|------------------------------------------------------------------------------|------|---|
| Gene_Symbol=GAPDH Glyceraldehyde-3-phosphate dehydrogenase                   | 9606 | 1 |
| Gene_Symbol=NANS Sialic acid synthase                                        | 9606 | 1 |
| Gene_Symbol=NANS N-acetylneuraminic acid synthase                            | 9606 | 1 |
| Gene_Symbol=NANS N-acetylneuraminic acid synthase                            | 9606 | 1 |
| Gene_Symbol=HNRNPC cDNA FLJ53542, highly similar to Heterogeneous nuclear    | 9606 | 1 |
| Gene_Symbol=HNRNPC Isoform C2 of Heterogeneous nuclear ribonucleoproteins    | 9606 | 1 |
| Gene_Symbol=HNRNPC Isoform C1 of Heterogeneous nuclear ribonucleoproteins    | 9606 | 1 |
| Gene_Symbol=HNRNPC Isoform 4 of Heterogeneous nuclear ribonucleoproteins (   | 9606 | 1 |
| Gene_Symbol=HNRNPC cDNA FLJ52975, highly similar to Heterogeneous nuclear    | 9606 | 1 |
| Gene_Symbol=- cDNA FLJ52993, highly similar to Heterogeneous nuclear ribonuc | 9606 | 1 |
| Gene_Symbol=TGFB2 Isoform A of Transforming growth factor beta-2             | 9606 | 1 |
| Gene_Symbol=TGFB2 Isoform B of Transforming growth factor beta-2             | 9606 | 1 |

| Name                                                                          | Species | Peptides(95 |
|-------------------------------------------------------------------------------|---------|-------------|
| Gene_Symbol=GAPDH Glyceraldehyde-3-phosphate dehydrogenase                    | 9606    | 17          |
| Gene_Symbol=GAPDH 32 kDa protein                                              | 9606    | 17          |
| Gene_Symbol=ANXA2 Isoform 1 of Annexin A2                                     | 9606    | 9           |
| Gene_Symbol=ANXA2 Isoform 2 of Annexin A2                                     | 9606    | 9           |
| Gene_Symbol=HNRNPA1 Isoform 2 of Heterogeneous nuclear ribonucleoprotein ,    | 9606    | 9           |
| Gene_Symbol=HNRNPA1L-2 Similar to Heterogeneous nuclear ribonucleoprotein A   | 9606    | 9           |
| Gene_Symbol=HNRNPA1 Isoform A1-A of Heterogeneous nuclear ribonucleoproti     | 9606    | 9           |
| Gene_Symbol=HNRNPA1 Isoform A1-B of Heterogeneous nuclear ribonucleoproti     | 9606    | 9           |
| Gene_Symbol=- Putative uncharacterized protein ENSP00000383298                | 9606    | 8           |
| Gene_Symbol=HNRNPA1L3 Putative heterogeneous nuclear ribonucleoprotein A1-l   | 9606    | 8           |
| Gene_Symbol=GDF15 Growth/differentiation factor 15                            | 9606    | 8           |
| Gene_Symbol=HNRNPC cDNA FLJ53542, highly similar to Heterogeneous nuclear     | 9606    | 5           |
| Gene_Symbol=HNRNPC Isoform C2 of Heterogeneous nuclear ribonucleoproteins     | 9606    | 5           |
| Gene_Symbol=HNRNPC Isoform C1 of Heterogeneous nuclear ribonucleoproteins     | 9606    | 5           |
| Gene_Symbol=HNRNPC Isoform 4 of Heterogeneous nuclear ribonucleoproteins (    | 9606    | 4           |
| Gene_Symbol=HNRNPA2B1 Putative uncharacterized protein HNRNPA2B1              | 9606    | 6           |
| Gene_Symbol=HNRNPA2B1 Isoform A2 of Heterogeneous nuclear ribonucleoprot      | 9606    | 6           |
| Gene_Symbol=HNRNPA2B1 Isoform B1 of Heterogeneous nuclear ribonucleoprot      | 9606    | 6           |
| Gene_Symbol=RPLP0 60S acidic ribosomal protein P0                             | 9606    | 6           |
| Gene_Symbol=RPLP0 cDNA FLJ51469, highly similar to 60S acidic ribosomal prote | 9606    | 5           |
| Gene_Symbol=RPLP0P6 60S acidic ribosomal protein P0-like                      | 9606    | 4           |
| Gene_Symbol=RPLP0 RPLP0 protein                                               | 9606    | 5           |
| Gene_Symbol=APEX1 DNA-(apurinic or apyrimidinic site) lyase                   | 9606    | 5           |
| Gene_Symbol=NPM1 Isoform 1 of Nucleophosmin                                   | 9606    | 3           |
| Gene_Symbol=NPM1 nucleophosmin isoform 3                                      | 9606    | 3           |
| Gene_Symbol=NPM1 Isoform 2 of Nucleophosmin                                   | 9606    | 2           |
| Gene_Symbol=SNORA62;RPSA;SNORA6;RPSAP15 Putative uncharacterized protei       | 9606    | 3           |
| Gene_Symbol=SNORA62;RPSA;SNORA6;RPSAP15 40S ribosomal protein SA              | 9606    | 3           |
| Gene_Symbol=SNORA62;RPSA;SNORA6;RPSAP15 33 kDa protein                        | 9606    | 3           |
| Gene_Symbol=SNORA62;RPSA;SNORA6;RPSAP15 16 kDa protein                        | 9606    | 3           |
| Gene_Symbol=SNORA62;RPSA;SNORA6;RPSAP15 Laminin receptor-like protein L/      | 9606    | 3           |
| Gene_Symbol=RPSAP58 Similar to Laminin receptor                               | 9606    | 2           |
| Gene_Symbol=- Putative uncharacterized protein ENSP00000346598                | 9606    | 2           |
| Gene_Symbol=GGH Gamma-glutamyl hydrolase                                      | 9606    | 3           |

|                                                                              |      |   |
|------------------------------------------------------------------------------|------|---|
| Gene_Symbol=ACTG1 cDNA FLJ57283, highly similar to Actin, cytoplasmic 2      | 9606 | 2 |
| Gene_Symbol=ACTB Beta actin variant (Fragment)                               | 9606 | 2 |
| Gene_Symbol=ACTB;ACTG1 cDNA FLJ52842, highly similar to Actin, cytoplasmic 1 | 9606 | 2 |
| Gene_Symbol=ACTG1 Actin, cytoplasmic 2                                       | 9606 | 2 |
| Gene_Symbol=ACTB Actin, cytoplasmic 1                                        | 9606 | 2 |
| Gene_Symbol=KRT1 Keratin, type II cytoskeletal 1                             | 9606 | 2 |
| Gene_Symbol=TALDO1 Transaldolase                                             | 9606 | 2 |
| Gene_Symbol=HNRNPAB 30 kDa protein                                           | 9606 | 3 |
| Gene_Symbol=HNRNPAB 36 kDa protein                                           | 9606 | 3 |
| Gene_Symbol=HNRNPAB 30 kDa protein                                           | 9606 | 3 |
| Gene_Symbol=HNRNPAB Putative uncharacterized protein HNRNPAB                 | 9606 | 3 |
| Gene_Symbol=HNRNPAB Isoform 3 of Heterogeneous nuclear ribonucleoprotein .   | 9606 | 3 |
| Gene_Symbol=HNRNPAB Isoform 2 of Heterogeneous nuclear ribonucleoprotein .   | 9606 | 3 |
| Gene_Symbol=HNRNPAB Isoform 1 of Heterogeneous nuclear ribonucleoprotein .   | 9606 | 2 |
| Gene_Symbol=HNRNPAB Isoform 4 of Heterogeneous nuclear ribonucleoprotein .   | 9606 | 2 |
| Gene_Symbol=LOC646817 similar to SET translocation                           | 9606 | 3 |
| Gene_Symbol=SET SET nuclear oncogene                                         | 9606 | 3 |
| Gene_Symbol=SET SET nuclear oncogene                                         | 9606 | 3 |
| Gene_Symbol=SET Putative uncharacterized protein SET                         | 9606 | 3 |
| Gene_Symbol=SET Isoform 2 of Protein SET                                     | 9606 | 3 |
| Gene_Symbol=SET Isoform 1 of Protein SET                                     | 9606 | 3 |
| Gene_Symbol=GNB2L1 Guanine nucleotide-binding protein subunit beta-2-like 1  | 9606 | 2 |
| Gene_Symbol=GNB2L1 30 kDa protein                                            | 9606 | 2 |
| Gene_Symbol=GNB2L1 Protein                                                   | 9606 | 2 |
| Gene_Symbol=GNB2L1 Protein                                                   | 9606 | 2 |
| Gene_Symbol=GNB2L1 Protein                                                   | 9606 | 2 |
| Gene_Symbol=CAPZA1 32 kDa protein                                            | 9606 | 2 |
| Gene_Symbol=CAPZA1 F-actin-capping protein subunit alpha-1                   | 9606 | 2 |
| Gene_Symbol=ALB 69 kDa protein                                               | 9606 | 2 |
| Gene_Symbol=ALB Isoform 1 of Serum albumin                                   | 9606 | 2 |
| Gene_Symbol=ALB Putative uncharacterized protein ALB                         | 9606 | 2 |
| Gene_Symbol=ALB cDNA FLJ50830, highly similar to Serum albumin               | 9606 | 2 |
| Gene_Symbol=ALB Putative uncharacterized protein ALB                         | 9606 | 2 |
| Gene_Symbol=ALB Putative uncharacterized protein ALB                         | 9606 | 2 |
| Gene_Symbol=ALB Isoform 2 of Serum albumin                                   | 9606 | 2 |
| Gene_Symbol=ALB ALB protein                                                  | 9606 | 2 |
| Gene_Symbol=ALB Protein                                                      | 9606 | 1 |
| Gene_Symbol=ALB 52 kDa protein                                               | 9606 | 1 |
| Gene_Symbol=HSP90AA1 Isoform 2 of Heat shock protein HSP 90-alpha            | 9606 | 2 |
| Gene_Symbol=HSP90AA1 Isoform 1 of Heat shock protein HSP 90-alpha            | 9606 | 2 |
| Gene_Symbol=HSP90AB1 Heat shock protein HSP 90-beta                          | 9606 | 2 |
| Gene_Symbol=HSP90AA2 Putative heat shock protein HSP 90-alpha A2             | 9606 | 2 |
| Gene_Symbol=- Putative uncharacterized protein ENSP00000371882               | 9606 | 2 |
| Gene_Symbol=HSP90AA1 cDNA FLJ57431, highly similar to Heat shock protein HS  | 9606 | 2 |
| Gene_Symbol=HSP90AB2P Similar to Heat shock protein HSP 90-beta              | 9606 | 2 |
| Gene_Symbol=HSP90AB1 Heat shock protein beta (Fragment)                      | 9606 | 2 |
| Gene_Symbol=PPP1CA serine/threonine-protein phosphatase PP1-alpha catalytic  | 9606 | 2 |
| Gene_Symbol=PPP1CA Serine/threonine-protein phosphatase PP1-alpha catalytic  | 9606 | 2 |
| Gene_Symbol=PPP1CA serine/threonine-protein phosphatase PP1-alpha catalytic  | 9606 | 2 |

|                                                                                 |      |   |
|---------------------------------------------------------------------------------|------|---|
| Gene_Symbol=PPP1CA Serine/threonine-protein phosphatase                         | 9606 | 2 |
| Gene_Symbol=PPP1CB Serine/threonine-protein phosphatase PP1-beta catalytic      | 9606 | 2 |
| Gene_Symbol=PPP1CC Isoform Gamma-2 of Serine/threonine-protein phosphata        | 9606 | 2 |
| Gene_Symbol=PPP1CC Isoform Gamma-1 of Serine/threonine-protein phosphata        | 9606 | 2 |
| Gene_Symbol=TF Serotransferrin                                                  | 9606 | 2 |
| Gene_Symbol=EEF1D elongation factor 1-delta isoform 3                           | 9606 | 1 |
| Gene_Symbol=EEF1D Isoform 2 of Elongation factor 1-delta                        | 9606 | 1 |
| Gene_Symbol=EEF1D elongation factor 1-delta isoform 4                           | 9606 | 1 |
| Gene_Symbol=EEF1D Isoform 1 of Elongation factor 1-delta                        | 9606 | 1 |
| Gene_Symbol=PRPS2 Isoform 2 of Ribose-phosphate pyrophosphokinase 2             | 9606 | 2 |
| Gene_Symbol=PRPS2 Isoform 1 of Ribose-phosphate pyrophosphokinase 2             | 9606 | 2 |
| Gene_Symbol=- 34 kDa protein                                                    | 9606 | 2 |
| Gene_Symbol=PRPS1 Ribose-phosphate pyrophosphokinase 1                          | 9606 | 2 |
| Gene_Symbol=PRPS1L1 Ribose-phosphate pyrophosphokinase 3                        | 9606 | 2 |
| Gene_Symbol=PRPS1 Phosphoribosyl pyrophosphate synthetase 1                     | 9606 | 2 |
| Gene_Symbol=PRPS2 16 kDa protein                                                | 9606 | 1 |
| Gene_Symbol=PRPS2 19 kDa protein                                                | 9606 | 1 |
| Gene_Symbol=MDH2 Malate dehydrogenase, mitochondrial                            | 9606 | 2 |
| Gene_Symbol=MDH2 cDNA FLJ52880, highly similar to Malate dehydrogenase, m       | 9606 | 1 |
| Gene_Symbol=MDH2 Malate dehydrogenase                                           | 9606 | 1 |
| Gene_Symbol=FDPS Farnesyl pyrophosphate synthase                                | 9606 | 2 |
| Gene_Symbol=FDPS farnesyl pyrophosphate synthase isoform b                      | 9606 | 2 |
| Gene_Symbol=- cDNA FLJ12779 fis, clone NT2RP2001748, moderately similar to F    | 9606 | 2 |
| Gene_Symbol=HNRNPK;MIR7-1 cDNA FLJ54552, highly similar to Heterogeneous        | 9606 | 2 |
| Gene_Symbol=HNRNPK;MIR7-1 Isoform 3 of Heterogeneous nuclear ribonucleop        | 9606 | 2 |
| Gene_Symbol=HNRNPK;MIR7-1 Heterogeneous nuclear ribonucleoprotein K             | 9606 | 2 |
| Gene_Symbol=HNRNPK;MIR7-1 Heterogeneous nuclear ribonucleoprotein K             | 9606 | 2 |
| Gene_Symbol=HNRNPK;MIR7-1 Isoform 2 of Heterogeneous nuclear ribonucleop        | 9606 | 2 |
| Gene_Symbol=HNRNPK;MIR7-1 Isoform 1 of Heterogeneous nuclear ribonucleop        | 9606 | 2 |
| Gene_Symbol=AKR1A1 Alcohol dehydrogenase [NADP+]                                | 9606 | 2 |
| Gene_Symbol=MDH1 Putative uncharacterized protein MDH1                          | 9606 | 2 |
| Gene_Symbol=MDH1 Malate dehydrogenase                                           | 9606 | 2 |
| Gene_Symbol=MDH1 Putative uncharacterized protein MDH1                          | 9606 | 2 |
| Gene_Symbol=MDH1 Malate dehydrogenase                                           | 9606 | 1 |
| Gene_Symbol=- Elongation factor 1-alpha                                         | 9606 | 1 |
| Gene_Symbol=EEF1A1P5;EEF1A1 Putative elongation factor 1-alpha-like 3           | 9606 | 1 |
| Gene_Symbol=EEF1A1 Elongation factor 1-alpha 1                                  | 9606 | 1 |
| Gene_Symbol=EEF1A1 Elongation factor 1-alpha                                    | 9606 | 1 |
| Gene_Symbol=EEF1A1 EEF1A protein (Fragment)                                     | 9606 | 1 |
| Gene_Symbol=EEF1A2 Elongation factor 1-alpha 2                                  | 9606 | 1 |
| Gene_Symbol=EEF1A2 Eukaryotic translation elongation factor 1 alpha 2 variant ( | 9606 | 1 |
| Gene_Symbol=PPP2R4 Serine/threonine-protein phosphatase 2A regulatory subu      | 9606 | 1 |
| Gene_Symbol=PPP2R4 Protein phosphatase 2A activator, regulatory subunit 4       | 9606 | 1 |
| Gene_Symbol=PPP2R4 Isoform 2 of Serine/threonine-protein phosphatase 2A act     | 9606 | 1 |
| Gene_Symbol=PPP2R4 Isoform 3 of Serine/threonine-protein phosphatase 2A act     | 9606 | 1 |
| Gene_Symbol=PPP2R4 Protein phosphatase 2A activator, regulatory subunit 4       | 9606 | 1 |
| Gene_Symbol=PPP2R4 cDNA FLJ54705, highly similar to Serine/threonine-protein    | 9606 | 1 |
| Gene_Symbol=PPP2R4 Protein phosphatase 2A activator, regulatory subunit 4       | 9606 | 1 |
| Gene_Symbol=PPP2R4 Protein phosphatase 2A activator, regulatory subunit 4       | 9606 | 1 |

|                                                                               |      |   |
|-------------------------------------------------------------------------------|------|---|
| Gene_Symbol=PPP2R4 Protein phosphatase 2A activator, regulatory subunit 4     | 9606 | 1 |
| Gene_Symbol=PPP2R4 Protein phosphatase 2A activator, regulatory subunit 4     | 9606 | 1 |
| Gene_Symbol=C9orf64 UPF0553 protein C9orf64                                   | 9606 | 1 |
| Gene_Symbol=C9orf64 Chromosome 9 open reading frame 64, isoform CRA_c         | 9606 | 1 |
| Gene_Symbol=FGFBP1 Fibroblast growth factor-binding protein 1                 | 9606 | 1 |
| Gene_Symbol=TPM2 Isoform 2 of Tropomyosin beta chain                          | 9606 | 1 |
| Gene_Symbol=TPM2 Isoform 3 of Tropomyosin beta chain                          | 9606 | 1 |
| Gene_Symbol=TPM2 cDNA FLJ57036, highly similar to Homo sapiens tropomyosin    | 9606 | 1 |
| Gene_Symbol=TPM2 Tropomyosin 2                                                | 9606 | 1 |
| Gene_Symbol=TPM2 Tropomyosin 2                                                | 9606 | 1 |
| Gene_Symbol=TPM2 Isoform 1 of Tropomyosin beta chain                          | 9606 | 1 |
| Gene_Symbol=TPM1 Tropomyosin 1 (Alpha), isoform CRA_o                         | 9606 | 1 |
| Gene_Symbol=TPM1 Isoform 6 of Tropomyosin alpha-1 chain                       | 9606 | 1 |
| Gene_Symbol=TPM1 tropomyosin alpha-1 chain isoform 3                          | 9606 | 1 |
| Gene_Symbol=TPM1 cDNA FLJ26372 fis, clone HRT06233                            | 9606 | 1 |
| Gene_Symbol=TPM1 Isoform 1 of Tropomyosin alpha-1 chain                       | 9606 | 1 |
| Gene_Symbol=TPM1 tropomyosin alpha-1 chain isoform 2                          | 9606 | 1 |
| Gene_Symbol=TPM1 cDNA FLJ16459 fis, clone BRCAN2002473, moderately similar    | 9606 | 1 |
| Gene_Symbol=TPM1 Isoform 4 of Tropomyosin alpha-1 chain                       | 9606 | 1 |
| Gene_Symbol=TPM1 Isoform 3 of Tropomyosin alpha-1 chain                       | 9606 | 1 |
| Gene_Symbol=TPM1 37 kDa protein                                               | 9606 | 1 |
| Gene_Symbol=TPM1 cDNA FLJ54760, highly similar to Rattus norvegicus tropomy   | 9606 | 1 |
| Gene_Symbol=TPM1 Isoform 2 of Tropomyosin alpha-1 chain                       | 9606 | 1 |
| Gene_Symbol=TPM1 Tropomyosin 1 alpha variant 6                                | 9606 | 1 |
| Gene_Symbol=TPM1 tropomyosin alpha-1 chain isoform 7                          | 9606 | 1 |
| Gene_Symbol=TPM1 Tropomyosin isoform                                          | 9606 | 1 |
| Gene_Symbol=- cDNA FLJ57891, highly similar to Tropomyosin beta chain         | 9606 | 1 |
| Gene_Symbol=TPM4 Isoform 2 of Tropomyosin alpha-4 chain                       | 9606 | 1 |
| Gene_Symbol=TPM4 Isoform 1 of Tropomyosin alpha-4 chain                       | 9606 | 1 |
| Gene_Symbol=TPM3 33 kDa protein                                               | 9606 | 1 |
| Gene_Symbol=TPM3 tropomyosin alpha-3 chain isoform 1                          | 9606 | 1 |
| Gene_Symbol=TPM3 Putative uncharacterized protein DKFZp686J1372               | 9606 | 1 |
| Gene_Symbol=TPM3 tropomyosin alpha-3 chain isoform 4                          | 9606 | 1 |
| Gene_Symbol=TPM3 tropomyosin alpha-3 chain isoform 5                          | 9606 | 1 |
| Gene_Symbol=TPM3 Tropomyosin 3, isoform CRA_b                                 | 9606 | 1 |
| Gene_Symbol=TPM3 Isoform 3 of Tropomyosin alpha-3 chain                       | 9606 | 1 |
| Gene_Symbol=TPM3 Isoform 2 of Tropomyosin alpha-3 chain                       | 9606 | 1 |
| Gene_Symbol=TPM4 cDNA FLJ52936, weakly similar to Tropomyosin alpha-4 chain   | 9606 | 1 |
| Gene_Symbol=TPM3 11 kDa protein                                               | 9606 | 1 |
| Gene_Symbol=HADH Isoform 2 of Hydroxyacyl-coenzyme A dehydrogenase, mito      | 9606 | 0 |
| Gene_Symbol=HADH Isoform 1 of Hydroxyacyl-coenzyme A dehydrogenase, mito      | 9606 | 0 |
| Gene_Symbol=HADH cDNA FLJ38699 fis, clone KIDNE2002168, highly similar to Sl  | 9606 | 0 |
| Gene_Symbol=SNRPA U1 small nuclear ribonucleoprotein A                        | 9606 | 1 |
| Gene_Symbol=SNRPA cDNA FLJ52249, highly similar to U1 small nuclear ribonucle | 9606 | 1 |
| Gene_Symbol=NDRG1 cDNA FLJ39243 fis, clone OCBBF2008283, highly similar to    | 9606 | 1 |
| Gene_Symbol=NDRG1 Protein NDRG1                                               | 9606 | 1 |
| Gene_Symbol=ANXA4 cDNA FLJ51794, highly similar to Annexin A4                 | 9606 | 1 |
| Gene_Symbol=ANXA4 annexin A4                                                  | 9606 | 1 |
| Gene_Symbol=HIST1H1B Histone H1.5                                             | 9606 | 1 |

|                                                                              |      |   |
|------------------------------------------------------------------------------|------|---|
| Gene_Symbol=CLU clusterin isoform 3                                          | 9606 | 1 |
| Gene_Symbol=CLU CLU                                                          | 9606 | 1 |
| Gene_Symbol=CLU Isoform 2 of Clusterin                                       | 9606 | 1 |
| Gene_Symbol=CLU Isoform 1 of Clusterin                                       | 9606 | 1 |
| Gene_Symbol=MAT2B Putative uncharacterized protein MAT2B                     | 9606 | 1 |
| Gene_Symbol=MAT2B Isoform 4 of Methionine adenosyltransferase 2 subunit beta | 9606 | 1 |
| Gene_Symbol=MAT2B Isoform 5 of Methionine adenosyltransferase 2 subunit beta | 9606 | 1 |
| Gene_Symbol=MAT2B Isoform 3 of Methionine adenosyltransferase 2 subunit beta | 9606 | 1 |
| Gene_Symbol=MAT2B Isoform 2 of Methionine adenosyltransferase 2 subunit beta | 9606 | 1 |
| Gene_Symbol=MAT2B Isoform 1 of Methionine adenosyltransferase 2 subunit beta | 9606 | 1 |
| Gene_Symbol=EIF3M Eukaryotic translation initiation factor 3 subunit M       | 9606 | 1 |
| Gene_Symbol=HNRPDL Isoform 2 of Heterogeneous nuclear ribonucleoprotein D    | 9606 | 1 |
| Gene_Symbol=HNRPDL Isoform 3 of Heterogeneous nuclear ribonucleoprotein D    | 9606 | 1 |
| Gene_Symbol=HNRPDL Isoform 1 of Heterogeneous nuclear ribonucleoprotein D    | 9606 | 1 |
| Gene_Symbol=GYG1 Putative uncharacterized protein GYG1                       | 9606 | 1 |
| Gene_Symbol=GYG1 Isoform GN-1S of Glycogenin-1                               | 9606 | 1 |
| Gene_Symbol=GYG1 cDNA FLJ57427, highly similar to Glycogenin-1               | 9606 | 1 |
| Gene_Symbol=GYG1 Isoform GN-1 of Glycogenin-1                                | 9606 | 1 |
| Gene_Symbol=GYG1 Isoform GN-1L of Glycogenin-1                               | 9606 | 1 |
| Gene_Symbol=C6orf15 STG protein                                              | 9606 | 1 |
| Gene_Symbol=- 34 kDa protein                                                 | 9606 | 1 |
| Gene_Symbol=C6orf15 Uncharacterized protein C6orf15                          | 9606 | 1 |

| Name                                                                  | Species | Peptides(95) |
|-----------------------------------------------------------------------|---------|--------------|
| Gene_Symbol=LDHA L-lactate dehydrogenase A chain isoform 3            | 9606    | 11           |
| Gene_Symbol=LDHA Isoform 1 of L-lactate dehydrogenase A chain         | 9606    | 11           |
| Gene_Symbol=ANXA5 36 kDa protein                                      | 9606    | 7            |
| Gene_Symbol=ANXA5 Annexin A5                                          | 9606    | 7            |
| Gene_Symbol=MDH2 Malate dehydrogenase, mitochondrial                  | 9606    | 6            |
| Gene_Symbol=TF Serotransferrin                                        | 9606    | 4            |
| Gene_Symbol=GLOD4 Uncharacterized protein C17orf25                    | 9606    | 4            |
| Gene_Symbol=- cDNA FLJ59092                                           | 9606    | 4            |
| Gene_Symbol=GLOD4 Isoform 2 of Glyoxalase domain-containing protein 4 | 9606    | 4            |
| Gene_Symbol=GLOD4 cDNA FLJ55095                                       | 9606    | 4            |
| Gene_Symbol=GLOD4 Isoform 1 of Glyoxalase domain-containing protein 4 | 9606    | 4            |
| Gene_Symbol=HSP90AB1 Heat shock protein HSP 90-beta                   | 9606    | 4            |
| Gene_Symbol=- Putative uncharacterized protein ENSP00000371882        | 9606    | 4            |
| Gene_Symbol=HSP90AB2P Similar to Heat shock protein HSP 90-beta       | 9606    | 4            |
| Gene_Symbol=MDH1 Malate dehydrogenase                                 | 9606    | 4            |
| Gene_Symbol=MDH1 Putative uncharacterized protein MDH1                | 9606    | 3            |
| Gene_Symbol=LDHB L-lactate dehydrogenase B chain                      | 9606    | 5            |
| Gene_Symbol=FAM49B Protein FAM49B                                     | 9606    | 4            |
| Gene_Symbol=- 31 kDa protein                                          | 9606    | 3            |
| Gene_Symbol=RPS2 40S ribosomal protein S2                             | 9606    | 3            |
| Gene_Symbol=ALB Isoform 1 of Serum albumin                            | 9606    | 2            |
| Gene_Symbol=ALB Putative uncharacterized protein ALB                  | 9606    | 2            |
| Gene_Symbol=ALB 69 kDa protein                                        | 9606    | 2            |
| Gene_Symbol=ALB cDNA FLJ50830, highly similar to Serum albumin        | 9606    | 2            |

|                                                                                                         |      |   |
|---------------------------------------------------------------------------------------------------------|------|---|
| Gene_Symbol=ALB Putative uncharacterized protein ALB                                                    | 9606 | 2 |
| Gene_Symbol=ALB Putative uncharacterized protein ALB                                                    | 9606 | 2 |
| Gene_Symbol=ALB Isoform 2 of Serum albumin                                                              | 9606 | 2 |
| Gene_Symbol=ALB ALB protein                                                                             | 9606 | 2 |
| Gene_Symbol=ALB Protein                                                                                 | 9606 | 2 |
| Gene_Symbol=ALB 52 kDa protein                                                                          | 9606 | 2 |
| Gene_Symbol=HIST1H1B Histone H1.5                                                                       | 9606 | 3 |
| Gene_Symbol=EEF1D elongation factor 1-delta isoform 3                                                   | 9606 | 3 |
| Gene_Symbol=EEF1D Isoform 2 of Elongation factor 1-delta                                                | 9606 | 3 |
| Gene_Symbol=EEF1D elongation factor 1-delta isoform 4                                                   | 9606 | 3 |
| Gene_Symbol=EEF1D Isoform 1 of Elongation factor 1-delta                                                | 9606 | 3 |
| Gene_Symbol=HNRPA1L-2 Similar to Heterogeneous nuclear ribonucleoprotein A                              | 9606 | 3 |
| Gene_Symbol=- Putative uncharacterized protein ENSP00000383298                                          | 9606 | 3 |
| Gene_Symbol=HNRNPA1 Isoform 2 of Heterogeneous nuclear ribonucleoprotein A                              | 9606 | 3 |
| Gene_Symbol=HNRPA1L3 Putative heterogeneous nuclear ribonucleoprotein A1-like 3                         | 9606 | 3 |
| Gene_Symbol=HNRNPA1 Isoform A1-A of Heterogeneous nuclear ribonucleoprotein A                           | 9606 | 3 |
| Gene_Symbol=HNRNPA1 Isoform A1-B of Heterogeneous nuclear ribonucleoprotein A                           | 9606 | 3 |
| Gene_Symbol=HNRNPA1L2 Heterogeneous nuclear ribonucleoprotein A1-like 2                                 | 9606 | 3 |
| Gene_Symbol=HNRNPA1 16 kDa protein                                                                      | 9606 | 3 |
| Gene_Symbol=- 32 kDa protein                                                                            | 9606 | 3 |
| Gene_Symbol=HIST1H1D Histone H1.3                                                                       | 9606 | 3 |
| Gene_Symbol=HIST1H1C Histone H1.2                                                                       | 9606 | 3 |
| Gene_Symbol=HIST1H1E Histone H1.4                                                                       | 9606 | 3 |
| Gene_Symbol=FGFBP1 Fibroblast growth factor-binding protein 1                                           | 9606 | 2 |
| Gene_Symbol=HNRNPA2B1 Putative uncharacterized protein HNRNPA2B1                                        | 9606 | 2 |
| Gene_Symbol=HNRNPA2B1 Isoform A2 of Heterogeneous nuclear ribonucleoprotein A                           | 9606 | 2 |
| Gene_Symbol=HNRNPA2B1 Isoform B1 of Heterogeneous nuclear ribonucleoprotein A                           | 9606 | 2 |
| Gene_Symbol=SNORD24;SNORD36B;SNORD36C;RPL7A;SNORD36A 60S ribosomal protein                              | 9606 | 2 |
| Gene_Symbol=SNORD24;SNORD36B;SNORD36C;RPL7A;SNORD36A Ribosomal protein                                  | 9606 | 2 |
| Gene_Symbol=- 30 kDa protein                                                                            | 9606 | 2 |
| Gene_Symbol=HNRNPK;MIR7-1 cDNA FLJ54552, highly similar to Heterogeneous nuclear ribonucleoprotein K    | 9606 | 2 |
| Gene_Symbol=HNRNPK;MIR7-1 Isoform 3 of Heterogeneous nuclear ribonucleoprotein K                        | 9606 | 2 |
| Gene_Symbol=HNRNPK;MIR7-1 Heterogeneous nuclear ribonucleoprotein K                                     | 9606 | 2 |
| Gene_Symbol=HNRNPK;MIR7-1 Heterogeneous nuclear ribonucleoprotein K                                     | 9606 | 2 |
| Gene_Symbol=HNRNPK;MIR7-1 Isoform 2 of Heterogeneous nuclear ribonucleoprotein K                        | 9606 | 2 |
| Gene_Symbol=HNRNPK;MIR7-1 Isoform 1 of Heterogeneous nuclear ribonucleoprotein K                        | 9606 | 2 |
| Gene_Symbol=NACA nascent polypeptide-associated complex subunit alpha isoform 1                         | 9606 | 2 |
| Gene_Symbol=NACA 24 kDa protein                                                                         | 9606 | 2 |
| Gene_Symbol=NACA Nascent polypeptide-associated complex subunit alpha                                   | 9606 | 2 |
| Gene_Symbol=NACAP1 Putative nascent polypeptide-associated complex subunit alpha                        | 9606 | 1 |
| Gene_Symbol=- cDNA FLJ53704, moderately similar to Nascent polypeptide-associated complex subunit alpha | 9606 | 1 |
| Gene_Symbol=ANP32B Isoform 2 of Acidic leucine-rich nuclear phosphoprotein 3                            | 9606 | 1 |
| Gene_Symbol=ANP32B Isoform 1 of Acidic leucine-rich nuclear phosphoprotein 3                            | 9606 | 1 |
| Gene_Symbol=OTUB1 Isoform 1 of Ubiquitin thioesterase OTUB1                                             | 9606 | 2 |
| Gene_Symbol=OTUB1 cDNA FLJ56307, highly similar to Ubiquitin thioesterase protein 1                     | 9606 | 2 |
| Gene_Symbol=OTUB1 Isoform 2 of Ubiquitin thioesterase OTUB1                                             | 9606 | 1 |
| Gene_Symbol=ISOC1 20 kDa protein                                                                        | 9606 | 2 |
| Gene_Symbol=ISOC1 26 kDa protein                                                                        | 9606 | 2 |
| Gene_Symbol=ISOC1 21 kDa protein                                                                        | 9606 | 2 |

|                                                                                 |      |   |
|---------------------------------------------------------------------------------|------|---|
| Gene_Symbol=ISOC1 Isochorismatase domain-containing protein 1                   | 9606 | 2 |
| Gene_Symbol=ISOC1 CGI-111 protein                                               | 9606 | 2 |
| Gene_Symbol=HADH cDNA FLJ38699 fis, clone KIDNE2002168, highly similar to S     | 9606 | 1 |
| Gene_Symbol=HADH Isoform 2 of Hydroxyacyl-coenzyme A dehydrogenase, mito        | 9606 | 1 |
| Gene_Symbol=HADH Isoform 1 of Hydroxyacyl-coenzyme A dehydrogenase, mito        | 9606 | 1 |
| Gene_Symbol=PHB2 Prohibitin-2                                                   | 9606 | 1 |
| Gene_Symbol=PHB2 cDNA FLJ56579, highly similar to Prohibitin-2                  | 9606 | 1 |
| Gene_Symbol=C6orf15 STG protein                                                 | 9606 | 1 |
| Gene_Symbol=- 34 kDa protein                                                    | 9606 | 1 |
| Gene_Symbol=C6orf15 Uncharacterized protein C6orf15                             | 9606 | 1 |
| Gene_Symbol=PPP2CA Serine/threonine-protein phosphatase                         | 9606 | 2 |
| Gene_Symbol=PPP2CA Serine/threonine-protein phosphatase 2A catalytic subuni     | 9606 | 2 |
| Gene_Symbol=PPP2CB Serine/threonine-protein phosphatase                         | 9606 | 2 |
| Gene_Symbol=PPP2CB Serine/threonine-protein phosphatase 2A catalytic subuni     | 9606 | 2 |
| Gene_Symbol=ECH1 Delta(3,5)-Delta(2,4)-dienoyl-CoA isomerase, mitochondrial     | 9606 | 1 |
| Gene_Symbol=RPS3A 24 kDa protein                                                | 9606 | 1 |
| Gene_Symbol=RPS3A Ribosomal protein S3A                                         | 9606 | 1 |
| Gene_Symbol=- 30 kDa protein                                                    | 9606 | 1 |
| Gene_Symbol=RPS3A 40S ribosomal protein S3a                                     | 9606 | 1 |
| Gene_Symbol=RPS3A 26 kDa protein                                                | 9606 | 1 |
| Gene_Symbol=RPS3A 17 kDa protein                                                | 9606 | 1 |
| Gene_Symbol=- 17 kDa protein                                                    | 9606 | 1 |
| Gene_Symbol=GNB2L1 30 kDa protein                                               | 9606 | 1 |
| Gene_Symbol=GNB2L1 Guanine nucleotide-binding protein subunit beta-2-like 1     | 9606 | 1 |
| Gene_Symbol=GNB2L1 Protein                                                      | 9606 | 1 |
| Gene_Symbol=GNB2L1 Protein                                                      | 9606 | 1 |
| Gene_Symbol=GNB2L1 Protein                                                      | 9606 | 1 |
| Gene_Symbol=GNB2L1 30 kDa protein                                               | 9606 | 1 |
| Gene_Symbol=GNB2L1 11 kDa protein                                               | 9606 | 1 |
| Gene_Symbol=GNB2L1 35 kDa protein                                               | 9606 | 1 |
| Gene_Symbol=GNB2L1 Protein                                                      | 9606 | 1 |
| Gene_Symbol=RPA2 Isoform 2 of Replication protein A 32 kDa subunit              | 9606 | 1 |
| Gene_Symbol=RPA2 Isoform 3 of Replication protein A 32 kDa subunit              | 9606 | 1 |
| Gene_Symbol=RPA2 Isoform 1 of Replication protein A 32 kDa subunit              | 9606 | 1 |
| Gene_Symbol=RPA2 cDNA FLJ51490, highly similar to Replication protein A 32 kD   | 9606 | 1 |
| Gene_Symbol=- Elongation factor 1-alpha                                         | 9606 | 1 |
| Gene_Symbol=EEF1A1P5;EEF1A1 Putative elongation factor 1-alpha-like 3           | 9606 | 1 |
| Gene_Symbol=EEF1A1 Elongation factor 1-alpha 1                                  | 9606 | 1 |
| Gene_Symbol=EEF1A1 Elongation factor 1-alpha                                    | 9606 | 1 |
| Gene_Symbol=- 18 kDa protein                                                    | 9606 | 1 |
| Gene_Symbol=SFRS2 cDNA FLJ52570, highly similar to Splicing factor, arginine/se | 9606 | 1 |
| Gene_Symbol=SFRS2 Splicing factor, arginine/serine-rich 2                       | 9606 | 1 |
| Gene_Symbol=NAPA Alpha-soluble NSF attachment protein                           | 9606 | 1 |
| Gene_Symbol=KRT8 Keratin, type II cytoskeletal 8                                | 9606 | 1 |
| Gene_Symbol=KRT8 27 kDa protein                                                 | 9606 | 1 |
| Gene_Symbol=LOC728638 Similar to Keratin, type II cytoskeletal 8                | 9606 | 1 |
| Gene_Symbol=KRT8 17 kDa protein                                                 | 9606 | 1 |
| Gene_Symbol=KRT8 25 kDa protein                                                 | 9606 | 1 |
| Gene_Symbol=- Keratin-8-like protein 1                                          | 9606 | 1 |

|                                                                              |      |   |
|------------------------------------------------------------------------------|------|---|
| Gene_Symbol=KRT8 14 kDa protein                                              | 9606 | 1 |
| Gene_Symbol=FLJ46111 cDNA FLJ46111 fis, clone TESTI2034913, moderately sim   | 9606 | 1 |
| Gene_Symbol=TUBB6 cDNA FLJ52712, highly similar to Tubulin beta-6 chain      | 9606 | 1 |
| Gene_Symbol=TUBB6 43 kDa protein                                             | 9606 | 1 |
| Gene_Symbol=TUBB6 46 kDa protein                                             | 9606 | 1 |
| Gene_Symbol=TUBB8;TUBB4Q Tubulin, beta 8, isoform CRA_c                      | 9606 | 1 |
| Gene_Symbol=TUBB4Q;TUBB8 tubulin beta-8 chain isoform 2                      | 9606 | 1 |
| Gene_Symbol=- 20 kDa protein                                                 | 9606 | 1 |
| Gene_Symbol=TUBBP5 Putative tubulin beta chain-like protein ENSP0000029037   | 9606 | 1 |
| Gene_Symbol=TUBB8 Tubulin beta-8 chain                                       | 9606 | 1 |
| Gene_Symbol=- Tubulin beta-8 chain B                                         | 9606 | 1 |
| Gene_Symbol=MIR220B cDNA FLJ55189, highly similar to Tubulin beta-4 chain    | 9606 | 1 |
| Gene_Symbol=TUBB4 27 kDa protein                                             | 9606 | 1 |
| Gene_Symbol=TUBB2A cDNA, FLJ93005, highly similar to Homo sapiens tubulin, t | 9606 | 1 |
| Gene_Symbol=TUBB6 cDNA FLJ11352 fis, clone HEMBA1000020, highly similar to   | 9606 | 1 |
| Gene_Symbol=TUBB4;MIR220B cDNA FLJ53341, highly similar to Tubulin beta-4 c  | 9606 | 1 |
| Gene_Symbol=MIR220B cDNA FLJ52536, highly similar to Tubulin beta-4 chain    | 9606 | 1 |
| Gene_Symbol=TUBB cDNA FLJ56903, highly similar to Tubulin beta-7 chain       | 9606 | 1 |
| Gene_Symbol=- cDNA FLJ53063, highly similar to Tubulin beta-7 chain          | 9606 | 1 |
| Gene_Symbol=TUBB Tubulin, beta                                               | 9606 | 1 |
| Gene_Symbol=TUBB Tubulin, beta                                               | 9606 | 1 |
| Gene_Symbol=TUBB2B Tubulin beta-2B chain                                     | 9606 | 1 |
| Gene_Symbol=TUBB4 Tubulin beta-4 chain                                       | 9606 | 1 |
| Gene_Symbol=TUBB2A Tubulin beta-2A chain                                     | 9606 | 1 |
| Gene_Symbol=TUBB2C Tubulin beta-2C chain                                     | 9606 | 1 |
| Gene_Symbol=MTAP S-methyl-5'-thioadenosine phosphorylase                     | 9606 | 1 |
| Gene_Symbol=MTAP cDNA FLJ59758, highly similar to S-methyl-5-thioadenosine   | 9606 | 1 |
| Gene_Symbol=KRT1 Keratin, type II cytoskeletal 1                             | 9606 | 1 |
| Gene_Symbol=COPS6 36 kDa protein                                             | 9606 | 1 |
| Gene_Symbol=COPS6 cDNA, FLJ92300, Homo sapiens COP9 subunit 6 (MOV34 hc      | 9606 | 1 |
| Gene_Symbol=COPS6 COP9 signalosome complex subunit 6                         | 9606 | 1 |
| Gene_Symbol=COPS6 cDNA FLJ57370, highly similar to COP9 signalosome compl    | 9606 | 1 |
| Gene_Symbol=LOC646817 similar to SET translocation                           | 9606 | 1 |
| Gene_Symbol=SET Isoform 1 of Protein SET                                     | 9606 | 1 |
| Gene_Symbol=SET SET nuclear oncogene                                         | 9606 | 1 |
| Gene_Symbol=SET SET nuclear oncogene                                         | 9606 | 1 |
| Gene_Symbol=SET Putative uncharacterized protein SET                         | 9606 | 1 |
| Gene_Symbol=SET Isoform 2 of Protein SET                                     | 9606 | 1 |
| Gene_Symbol=- Putative uncharacterized protein ENSP00000395225               | 9606 | 1 |
| Gene_Symbol=- Putative uncharacterized protein ENSP00000400408               | 9606 | 1 |
| Gene_Symbol=CDK4 Cell division protein kinase 4                              | 9606 | 0 |
| Gene_Symbol=ULBP2 cDNA FLJ56582, highly similar to NKG2D ligand 2            | 9606 | 1 |
| Gene_Symbol=ULBP2 NKG2D ligand 2                                             | 9606 | 1 |

| Name                                             | Species | Peptides(95 |
|--------------------------------------------------|---------|-------------|
| Gene_Symbol=YWHAE 14-3-3 protein epsilon         | 9606    | 8           |
| Gene_Symbol=HMGB1 High mobility group protein B1 | 9606    | 8           |
| Gene_Symbol=HMGB1 High-mobility group box 1      | 9606    | 7           |



|                                                                               |      |   |
|-------------------------------------------------------------------------------|------|---|
| Gene_Symbol=HMGB1 cDNA FLJ56337, highly similar to High mobility group prot   | 9606 | 7 |
| Gene_Symbol=YWHAZ 14-3-3 protein zeta/delta                                   | 9606 | 7 |
| Gene_Symbol=CLIC1 Chloride intracellular channel protein 1                    | 9606 | 8 |
| Gene_Symbol=PCNA Proliferating cell nuclear antigen                           | 9606 | 6 |
| Gene_Symbol=LGALS3 Galectin-3                                                 | 9606 | 6 |
| Gene_Symbol=CBR1 Carbonyl reductase [NADPH] 1                                 | 9606 | 4 |
| Gene_Symbol=RPS3 40S ribosomal protein S3                                     | 9606 | 3 |
| Gene_Symbol=TF Serotransferrin                                                | 9606 | 4 |
| Gene_Symbol=TPI1;TPI1P1 Isoform 1 of Triosephosphate isomerase                | 9606 | 4 |
| Gene_Symbol=TPI1;TPI1P1 22 kDa protein                                        | 9606 | 4 |
| Gene_Symbol=TPI1;TPI1P1 triosephosphate isomerase isoform 2                   | 9606 | 4 |
| Gene_Symbol=TPI1;TPI1P1 Isoform 2 of Triosephosphate isomerase                | 9606 | 3 |
| Gene_Symbol=HNRPA1L-2 Similar to Heterogeneous nuclear ribonucleoprotein A    | 9606 | 4 |
| Gene_Symbol=- Putative uncharacterized protein ENSP00000383298                | 9606 | 4 |
| Gene_Symbol=HNRNPA1 Isoform 2 of Heterogeneous nuclear ribonucleoprotein      | 9606 | 4 |
| Gene_Symbol=HNRPA1L3 Putative heterogeneous nuclear ribonucleoprotein A1-l    | 9606 | 4 |
| Gene_Symbol=HNRNPA1 Isoform A1-A of Heterogeneous nuclear ribonucleoprot      | 9606 | 4 |
| Gene_Symbol=HNRNPA1 Isoform A1-B of Heterogeneous nuclear ribonucleoprot      | 9606 | 4 |
| Gene_Symbol=- 32 kDa protein                                                  | 9606 | 3 |
| Gene_Symbol=HNRNPA1 16 kDa protein                                            | 9606 | 3 |
| Gene_Symbol=PGAM1 Phosphoglycerate mutase 1                                   | 9606 | 4 |
| Gene_Symbol=- 29 kDa protein                                                  | 9606 | 4 |
| Gene_Symbol=TPM3 tropomyosin alpha-3 chain isoform 4                          | 9606 | 3 |
| Gene_Symbol=TPM3 Isoform 2 of Tropomyosin alpha-3 chain                       | 9606 | 3 |
| Gene_Symbol=TPM3 Putative uncharacterized protein DKFZp686J1372               | 9606 | 3 |
| Gene_Symbol=TPM3 tropomyosin alpha-3 chain isoform 5                          | 9606 | 3 |
| Gene_Symbol=TPM3 Tropomyosin 3, isoform CRA_b                                 | 9606 | 3 |
| Gene_Symbol=TPM3 Isoform 3 of Tropomyosin alpha-3 chain                       | 9606 | 3 |
| Gene_Symbol=TPM3 cDNA FLJ50720, highly similar to Homo sapiens tropomyosin    | 9606 | 2 |
| Gene_Symbol=TPM3 cDNA FLJ35393 fis, clone SKNSH2000971, highly similar to T   | 9606 | 2 |
| Gene_Symbol=HNRNPA2B1 Putative uncharacterized protein HNRNPA2B1              | 9606 | 3 |
| Gene_Symbol=HNRNPA2B1 Isoform A2 of Heterogeneous nuclear ribonucleoprot      | 9606 | 3 |
| Gene_Symbol=HNRNPA2B1 Isoform B1 of Heterogeneous nuclear ribonucleoprot      | 9606 | 3 |
| Gene_Symbol=DDAH2 Dimethylarginine dimethylaminohydrolase 2                   | 9606 | 3 |
| Gene_Symbol=DDAH2 Dimethylarginine dimethylaminohydrolase 2                   | 9606 | 3 |
| Gene_Symbol=DDAH2 Dimethylarginine dimethylaminohydrolase 2                   | 9606 | 3 |
| Gene_Symbol=DDAH2 Dimethylarginine dimethylaminohydrolase 2                   | 9606 | 3 |
| Gene_Symbol=DDAH2 N(G),N(G)-dimethylarginine dimethylaminohydrolase 2         | 9606 | 3 |
| Gene_Symbol=PNP cDNA FLJ25678 fis, clone TST04067, highly similar to PURINE I | 9606 | 2 |
| Gene_Symbol=HMGB2 High-mobility group box 2                                   | 9606 | 6 |
| Gene_Symbol=HMGB2 High mobility group protein B2                              | 9606 | 6 |
| Gene_Symbol=PHB Prohibitin variant (Fragment)                                 | 9606 | 3 |
| Gene_Symbol=PHB Prohibitin                                                    | 9606 | 3 |
| Gene_Symbol=PHB 27 kDa protein                                                | 9606 | 2 |
| Gene_Symbol=PHB Putative uncharacterized protein PHB                          | 9606 | 2 |
| Gene_Symbol=PHB Putative uncharacterized protein PHB                          | 9606 | 2 |
| Gene_Symbol=ACTG1 cDNA FLJ57283, highly similar to Actin, cytoplasmic 2       | 9606 | 2 |
| Gene_Symbol=ACTB Beta actin variant (Fragment)                                | 9606 | 2 |
| Gene_Symbol=ACTB;ACTG1 cDNA FLJ52842, highly similar to Actin, cytoplasmic 1  | 9606 | 2 |

|                                                                                |      |   |
|--------------------------------------------------------------------------------|------|---|
| Gene_Symbol=ACTG1 Actin, cytoplasmic 2                                         | 9606 | 2 |
| Gene_Symbol=ACTB Actin, cytoplasmic 1                                          | 9606 | 2 |
| Gene_Symbol=ACTC1 cDNA FLJ78096, highly similar to Homo sapiens actin, alpha   | 9606 | 1 |
| Gene_Symbol=ACTG2 cDNA FLJ51195, highly similar to Actin, gamma-enteric smc    | 9606 | 1 |
| Gene_Symbol=ACTG2 Actin, gamma-enteric smooth muscle                           | 9606 | 1 |
| Gene_Symbol=ACTC1 Actin, alpha cardiac muscle 1                                | 9606 | 1 |
| Gene_Symbol=ACTA1 Actin, alpha skeletal muscle                                 | 9606 | 1 |
| Gene_Symbol=ACTA2 Actin, aortic smooth muscle                                  | 9606 | 1 |
| Gene_Symbol=ACTB cDNA FLJ53662, highly similar to Actin, alpha skeletal muscle | 9606 | 1 |
| Gene_Symbol=ACTA1 cDNA FLJ39583 fis, clone SKMUS2004897, highly similar to     | 9606 | 1 |
| Gene_Symbol=SFN Isoform 2 of 14-3-3 protein sigma                              | 9606 | 2 |
| Gene_Symbol=SFN Isoform 1 of 14-3-3 protein sigma                              | 9606 | 2 |
| Gene_Symbol=PSMA1 Isoform Long of Proteasome subunit alpha type-1              | 9606 | 2 |
| Gene_Symbol=PSMA1 Isoform Short of Proteasome subunit alpha type-1             | 9606 | 2 |
| Gene_Symbol=PSMA1 Proteasome subunit alpha type                                | 9606 | 2 |
| Gene_Symbol=CACYBP Isoform 1 of Calcyclin-binding protein                      | 9606 | 2 |
| Gene_Symbol=CACYBP 23 kDa protein                                              | 9606 | 1 |
| Gene_Symbol=CACYBP cDNA FLJ36106 fis, clone TESTI2021531, highly similar to (  | 9606 | 1 |
| Gene_Symbol=ANP32B Isoform 2 of Acidic leucine-rich nuclear phosphoprotein 3   | 9606 | 2 |
| Gene_Symbol=ANP32B Isoform 1 of Acidic leucine-rich nuclear phosphoprotein 3   | 9606 | 2 |
| Gene_Symbol=ANP32B Acidic (Leucine-rich) nuclear phosphoprotein 32 family, m   | 9606 | 1 |
| Gene_Symbol=RPL7;RPL7P32 32 kDa protein                                        | 9606 | 2 |
| Gene_Symbol=RPL7;RPL7P32 Putative uncharacterized protein RPL7                 | 9606 | 2 |
| Gene_Symbol=RPL7;RPL7P32 30 kDa protein                                        | 9606 | 2 |
| Gene_Symbol=RPL7;RPL7P32 60S ribosomal protein L7                              | 9606 | 2 |
| Gene_Symbol=- 30 kDa protein                                                   | 9606 | 2 |
| Gene_Symbol=RPS3A 40S ribosomal protein S3a                                    | 9606 | 2 |
| Gene_Symbol=RPS3A 24 kDa protein                                               | 9606 | 2 |
| Gene_Symbol=RPS3A Ribosomal protein S3A                                        | 9606 | 2 |
| Gene_Symbol=RPS3A 26 kDa protein                                               | 9606 | 2 |
| Gene_Symbol=RPS3A 17 kDa protein                                               | 9606 | 2 |
| Gene_Symbol=- 17 kDa protein                                                   | 9606 | 1 |
| Gene_Symbol=RPS3A 23 kDa protein                                               | 9606 | 1 |
| Gene_Symbol=RPS4X 40S ribosomal protein S4, X isoform                          | 9606 | 1 |
| Gene_Symbol=RPS4Y2 40S ribosomal protein S4, Y isoform 2                       | 9606 | 1 |
| Gene_Symbol=RPS4Y1 Putative uncharacterized protein RPS4Y1                     | 9606 | 1 |
| Gene_Symbol=RPS4Y1 40S ribosomal protein S4, Y isoform 1                       | 9606 | 1 |
| Gene_Symbol=KRT1 Keratin, type II cytoskeletal 1                               | 9606 | 1 |
| Gene_Symbol=HIST1H1B Histone H1.5                                              | 9606 | 1 |
| Gene_Symbol=SARNP SAP domain-containing ribonucleoprotein                      | 9606 | 1 |
| Gene_Symbol=SARNP 18 kDa protein                                               | 9606 | 1 |
| Gene_Symbol=- 52 kDa protein                                                   | 9606 | 1 |
| Gene_Symbol=SARNP 5 kDa protein                                                | 9606 | 1 |
| Gene_Symbol=- Similar to Nuclear protein Hcc-1                                 | 9606 | 0 |
| Gene_Symbol=HIST2H2BF histone H2B type 2-F isoform b                           | 9606 | 1 |
| Gene_Symbol=HIST1H2BN Histone H2B type 1-N                                     | 9606 | 1 |
| Gene_Symbol=HIST2H2BF Histone H2B                                              | 9606 | 1 |
| Gene_Symbol=HIST2H2BF Histone H2B type 2-F                                     | 9606 | 1 |
| Gene_Symbol=HIST1H2BH Histone H2B type 1-H                                     | 9606 | 1 |

|                                                                             |      |   |
|-----------------------------------------------------------------------------|------|---|
| Gene_Symbol=HIST1H2BB Histone H2B type 1-B                                  | 9606 | 1 |
| Gene_Symbol=HIST1H2BO Histone H2B type 1-O                                  | 9606 | 1 |
| Gene_Symbol=HIST1H2BD Histone H2B                                           | 9606 | 1 |
| Gene_Symbol=HIST1H2BE;HIST1H2BC;HIST1H2BI;HIST1H2BF;HIST1H2BG HIST1H:       | 9606 | 1 |
| Gene_Symbol=HIST1H2BM Histone H2B type 1-M                                  | 9606 | 1 |
| Gene_Symbol=HIST1H2BJ Histone H2B type 1-J                                  | 9606 | 1 |
| Gene_Symbol=H2BFS Histone H2B type F-S                                      | 9606 | 1 |
| Gene_Symbol=HIST1H2BK Histone H2B type 1-K                                  | 9606 | 1 |
| Gene_Symbol=HIST1H2BD Histone H2B type 1-D                                  | 9606 | 1 |
| Gene_Symbol=HIST1H2BE;HIST1H2BC;HIST1H2BI;HIST1H2BF;HIST1H2BG Histone       | 9606 | 1 |
| Gene_Symbol=HIST2H2BE Histone H2B type 2-E                                  | 9606 | 1 |
| Gene_Symbol=HIST1H2BL Histone H2B type 1-L                                  | 9606 | 1 |
| Gene_Symbol=HIST3H2BB Histone H2B type 3-B                                  | 9606 | 1 |
| Gene_Symbol=SFRS1 Isoform ASF-2 of Splicing factor, arginine/serine-rich 1  | 9606 | 1 |
| Gene_Symbol=SFRS1 Isoform ASF-3 of Splicing factor, arginine/serine-rich 1  | 9606 | 1 |
| Gene_Symbol=SFRS1 Isoform ASF-1 of Splicing factor, arginine/serine-rich 1  | 9606 | 1 |
| Gene_Symbol=SNRPA1 U2 snRNP-specific A' protein                             | 9606 | 1 |
| Gene_Symbol=SNRPA1 cDNA FLJ75425, highly similar to Homo sapiens small nucl | 9606 | 1 |
| Gene_Symbol=SNRPA1 U2 small nuclear ribonucleoprotein A'                    | 9606 | 1 |
| Gene_Symbol=PSMA4 27 kDa protein                                            | 9606 | 0 |
| Gene_Symbol=PSMA4 Proteasome subunit alpha type-4                           | 9606 | 0 |
| Gene_Symbol=PSMA4 26 kDa protein                                            | 9606 | 0 |
| Gene_Symbol=PSMA4 Proteasome subunit beta type                              | 9606 | 0 |
| Gene_Symbol=PSMA4 20 kDa protein                                            | 9606 | 0 |
| Gene_Symbol=PSMA7 Isoform 2 of Proteasome subunit alpha type-7              | 9606 | 1 |
| Gene_Symbol=PSMA7 Isoform 1 of Proteasome subunit alpha type-7              | 9606 | 1 |
| Gene_Symbol=PSMA8 Isoform 3 of Proteasome subunit alpha type-7-like         | 9606 | 1 |
| Gene_Symbol=PSMA8 Isoform 2 of Proteasome subunit alpha type-7-like         | 9606 | 1 |
| Gene_Symbol=PSMA8 Isoform 1 of Proteasome subunit alpha type-7-like         | 9606 | 1 |
| Gene_Symbol=SNORA62;RPSA;SNORA6;RPSAP15 Putative uncharacterized protei     | 9606 | 1 |
| Gene_Symbol=SNORA62;RPSA;SNORA6;RPSAP15 17 kDa protein                      | 9606 | 1 |
| Gene_Symbol=SNORA62;RPSA;SNORA6;RPSAP15 16 kDa protein                      | 9606 | 1 |
| Gene_Symbol=SNORA62;RPSA;SNORA6;RPSAP15 40S ribosomal protein SA            | 9606 | 1 |
| Gene_Symbol=SNORA62;RPSA;SNORA6;RPSAP15 33 kDa protein                      | 9606 | 1 |
| Gene_Symbol=SNORA62;RPSA;SNORA6;RPSAP15 Laminin receptor-like protein L/    | 9606 | 1 |
| Gene_Symbol=PGLS 6-phosphogluconolactonase                                  | 9606 | 1 |
| Gene_Symbol=ALB Putative uncharacterized protein ALB                        | 9606 | 1 |
| Gene_Symbol=ALB 69 kDa protein                                              | 9606 | 1 |
| Gene_Symbol=ALB Isoform 1 of Serum albumin                                  | 9606 | 1 |
| Gene_Symbol=ALB Protein                                                     | 9606 | 1 |
| Gene_Symbol=ALB 52 kDa protein                                              | 9606 | 1 |
| Gene_Symbol=ALB cDNA FLJ50830, highly similar to Serum albumin              | 9606 | 1 |
| Gene_Symbol=ALB Putative uncharacterized protein ALB                        | 9606 | 1 |
| Gene_Symbol=ALB Putative uncharacterized protein ALB                        | 9606 | 1 |
| Gene_Symbol=ALB Isoform 2 of Serum albumin                                  | 9606 | 1 |
| Gene_Symbol=ALB ALB protein                                                 | 9606 | 1 |
| Gene_Symbol=LOC100288788 hypothetical protein XP_002343863                  | 9606 | 1 |
| Gene_Symbol=RBMX cDNA FLJ34201 fis, clone FCBBF3019714, highly similar to H | 9606 | 1 |
| Gene_Symbol=RBMX cDNA FLJ38696 fis, clone KIDNE2001931, highly similar to H | 9606 | 1 |

|                                                                                |      |   |
|--------------------------------------------------------------------------------|------|---|
| Gene_Symbol=RBMX Heterogeneous nuclear ribonucleoprotein G                     | 9606 | 1 |
| Gene_Symbol=NACA nascent polypeptide-associated complex subunit alpha isofo    | 9606 | 1 |
| Gene_Symbol=NACA Nascent polypeptide-associated complex subunit alpha          | 9606 | 1 |
| Gene_Symbol=NACA 24 kDa protein                                                | 9606 | 1 |
| Gene_Symbol=NACAP1 Putative nascent polypeptide-associated complex subunit     | 9606 | 1 |
| Gene_Symbol=YWHAB Isoform Long of 14-3-3 protein beta/alpha                    | 9606 | 2 |
| Gene_Symbol=YWHAB Isoform Short of 14-3-3 protein beta/alpha                   | 9606 | 2 |
| Gene_Symbol=YWHAB Tyrosine 3-monooxygenase/tryptophan 5-monooxygenase          | 9606 | 1 |
| Gene_Symbol=YWHAB Tyrosine 3-monooxygenase/tryptophan 5-monooxygenase          | 9606 | 1 |
| Gene_Symbol=KRT8 25 kDa protein                                                | 9606 | 1 |
| Gene_Symbol=KRT8 Keratin, type II cytoskeletal 8                               | 9606 | 1 |
| Gene_Symbol=KRT8 14 kDa protein                                                | 9606 | 1 |
| Gene_Symbol=- Keratin-8-like protein 1                                         | 9606 | 1 |
| Gene_Symbol=KRT8 17 kDa protein                                                | 9606 | 1 |
| Gene_Symbol=KRT8 27 kDa protein                                                | 9606 | 1 |
| Gene_Symbol=LOC728638 Similar to Keratin, type II cytoskeletal 8               | 9606 | 1 |
| Gene_Symbol=FLJ46111 cDNA FLJ46111 fis, clone TESTI2034913, moderately sim     | 9606 | 1 |
| Gene_Symbol=HIST1H1D Histone H1.3                                              | 9606 | 1 |
| Gene_Symbol=HIST1H1E Histone H1.4                                              | 9606 | 1 |
| Gene_Symbol=HIST1H1C Histone H1.2                                              | 9606 | 1 |
| Gene_Symbol=HIST1H1T Histone H1t                                               | 9606 | 1 |
| Gene_Symbol=HIST1H1A Histone H1.1                                              | 9606 | 1 |
| Gene_Symbol=ABHD10 Putative uncharacterized protein ABHD10                     | 9606 | 1 |
| Gene_Symbol=ABHD10 Abhydrolase domain-containing protein 10, mitochondria      | 9606 | 1 |
| Gene_Symbol=TIMP1 TIMP metallopeptidase inhibitor 1                            | 9606 | 1 |
| Gene_Symbol=TIMP1 TIMP metallopeptidase inhibitor 1                            | 9606 | 1 |
| Gene_Symbol=TIMP1 Metalloproteinase inhibitor 1                                | 9606 | 1 |
| Gene_Symbol=TIMP1 TIMP metallopeptidase inhibitor 1                            | 9606 | 1 |
| Gene_Symbol=RAD23B cDNA FLJ56531, highly similar to UV excision repair protei  | 9606 | 1 |
| Gene_Symbol=RAD23B UV excision repair protein RAD23 homolog B                  | 9606 | 1 |
| Gene_Symbol=RPL14 Ribosomal protein L14 variant                                | 9606 | 1 |
| Gene_Symbol=SNORA41;EEF1B2 Elongation factor 1-beta                            | 9606 | 1 |
| Gene_Symbol=SNORA41;EEF1B2 8 kDa protein                                       | 9606 | 1 |
| Gene_Symbol=SNORA41;EEF1B2 Putative uncharacterized protein EEF1B2             | 9606 | 1 |
| Gene_Symbol=SNORA41;EEF1B2 3 kDa protein                                       | 9606 | 1 |
| Gene_Symbol=PAFAH1B2 Platelet-activating factor acetylhydrolase IB subunit bet | 9606 | 1 |
| Gene_Symbol=HIST1H4E;HIST1H4A;HIST1H4I;HIST4H4;HIST1H4F;HIST2H4A;HIST1         | 9606 | 1 |
| Gene_Symbol=HNRNPK;MIR7-1 cDNA FLJ54552, highly similar to Heterogeneous       | 9606 | 1 |
| Gene_Symbol=HNRNPK;MIR7-1 Isoform 3 of Heterogeneous nuclear ribonucleop       | 9606 | 1 |
| Gene_Symbol=HNRNPK;MIR7-1 Heterogeneous nuclear ribonucleoprotein K            | 9606 | 1 |
| Gene_Symbol=HNRNPK;MIR7-1 Heterogeneous nuclear ribonucleoprotein K            | 9606 | 1 |
| Gene_Symbol=HNRNPK;MIR7-1 Isoform 2 of Heterogeneous nuclear ribonucleop       | 9606 | 1 |
| Gene_Symbol=HNRNPK;MIR7-1 Isoform 1 of Heterogeneous nuclear ribonucleop       | 9606 | 1 |
| Gene_Symbol=PSME1 proteasome activator complex subunit 1 isoform 2             | 9606 | 0 |
| Gene_Symbol=PSME1 Proteasome activator complex subunit 1                       | 9606 | 0 |
| Gene_Symbol=FKBP3 Peptidyl-prolyl cis-trans isomerase FKBP3                    | 9606 | 1 |
| Gene_Symbol=PCBP1 Poly(rC)-binding protein 1                                   | 9606 | 1 |
| Gene_Symbol=GSTO1 Glutathione S-transferase omega 1                            | 9606 | 0 |
| Gene_Symbol=GSTO1 Glutathione S-transferase omega-1                            | 9606 | 0 |

|                                                                           |      |   |
|---------------------------------------------------------------------------|------|---|
| Gene_Symbol=PSMA6 Similar to Prosome P27K protein                         | 9606 | 1 |
| Gene_Symbol=PSMA6 Proteasome subunit alpha type-6                         | 9606 | 1 |
| Gene_Symbol=RPS6 Ribosomal protein S6, isoform CRA_a                      | 9606 | 1 |
| Gene_Symbol=RPS6 Ribosomal protein S6                                     | 9606 | 1 |
| Gene_Symbol=RPS6 40S ribosomal protein S6                                 | 9606 | 1 |
| Gene_Symbol=DCI Isoform 2 of 3,2-trans-enoyl-CoA isomerase, mitochondrial | 9606 | 1 |
| Gene_Symbol=DCI Isoform 1 of 3,2-trans-enoyl-CoA isomerase, mitochondrial | 9606 | 1 |

| Name                                                                    | Species | Peptides(95) |
|-------------------------------------------------------------------------|---------|--------------|
| Gene_Symbol=KRT1 Keratin, type II cytoskeletal 1                        | 9606    | 17           |
| Gene_Symbol=TPI1;TPI1P1 Isoform 1 of Triosephosphate isomerase          | 9606    | 20           |
| Gene_Symbol=TPI1;TPI1P1 triosephosphate isomerase isoform 2             | 9606    | 20           |
| Gene_Symbol=YWHAE 14-3-3 protein epsilon                                | 9606    | 11           |
| Gene_Symbol=KRT10 Keratin, type I cytoskeletal 10                       | 9606    | 8            |
| Gene_Symbol=KRT9 Keratin, type I cytoskeletal 9                         | 9606    | 5            |
| Gene_Symbol=PRDX6 Peroxiredoxin-6                                       | 9606    | 5            |
| Gene_Symbol=LMNA Rhabdomyosarcoma antigen MU-RMS-40.12                  | 9606    | 4            |
| Gene_Symbol=LMNA Progerin                                               | 9606    | 4            |
| Gene_Symbol=LMNA Isoform C of Lamin-A/C                                 | 9606    | 4            |
| Gene_Symbol=LMNA Isoform A of Lamin-A/C                                 | 9606    | 4            |
| Gene_Symbol=LMNA Lamin A/C                                              | 9606    | 4            |
| Gene_Symbol=LMNA Isoform ADelta10 of Lamin-A/C                          | 9606    | 4            |
| Gene_Symbol=YWHAZ 14-3-3 protein zeta/delta                             | 9606    | 5            |
| Gene_Symbol=KRT8 Keratin, type II cytoskeletal 8                        | 9606    | 5            |
| Gene_Symbol=KRT8 27 kDa protein                                         | 9606    | 4            |
| Gene_Symbol=LOC728638 Similar to Keratin, type II cytoskeletal 8        | 9606    | 4            |
| Gene_Symbol=KRT8 17 kDa protein                                         | 9606    | 3            |
| Gene_Symbol=KRT18 Keratin, type I cytoskeletal 18                       | 9606    | 3            |
| Gene_Symbol=KRT2 Keratin, type II cytoskeletal 2 epidermal              | 9606    | 5            |
| Gene_Symbol=KRT19 Keratin, type I cytoskeletal 19                       | 9606    | 4            |
| Gene_Symbol=CFD Complement factor D preproprotein                       | 9606    | 3            |
| Gene_Symbol=AK2 Isoform 5 of Adenylate kinase 2, mitochondrial          | 9606    | 3            |
| Gene_Symbol=AK2 Isoform 2 of Adenylate kinase 2, mitochondrial          | 9606    | 3            |
| Gene_Symbol=AK2 Isoform 1 of Adenylate kinase 2, mitochondrial          | 9606    | 3            |
| Gene_Symbol=AK2 Isoform 6 of Adenylate kinase 2, mitochondrial          | 9606    | 3            |
| Gene_Symbol=AK2 Isoform 3 of Adenylate kinase 2, mitochondrial          | 9606    | 2            |
| Gene_Symbol=PRDX4 Putative uncharacterized protein PRDX4                | 9606    | 2            |
| Gene_Symbol=PRDX4 Peroxiredoxin-4                                       | 9606    | 2            |
| Gene_Symbol=PRDX4 Protein                                               | 9606    | 2            |
| Gene_Symbol=TSN cDNA FLJ59957, highly similar to Translin               | 9606    | 3            |
| Gene_Symbol=TSN Protein                                                 | 9606    | 3            |
| Gene_Symbol=TSN Translin                                                | 9606    | 3            |
| Gene_Symbol=PSMA3 Isoform 1 of Proteasome subunit alpha type-3          | 9606    | 2            |
| Gene_Symbol=PSMA3 Isoform 2 of Proteasome subunit alpha type-3          | 9606    | 2            |
| Gene_Symbol=ELAVL1 ELAV-like protein 1                                  | 9606    | 3            |
| Gene_Symbol=ELAVL1 cDNA FLJ60076, highly similar to ELAV-like protein 1 | 9606    | 3            |
| Gene_Symbol=HSPB1 Heat shock protein beta-1                             | 9606    | 2            |
| Gene_Symbol=RAN;RANP1 26 kDa protein                                    | 9606    | 2            |

|                                                                                |      |   |
|--------------------------------------------------------------------------------|------|---|
| Gene_Symbol=RAN;RANP1 RAN, member RAS oncogene family, isoform CRA_c           | 9606 | 2 |
| Gene_Symbol=RAN;RANP1 GTP-binding nuclear protein Ran                          | 9606 | 2 |
| Gene_Symbol=RAN;RANP1 27 kDa protein                                           | 9606 | 2 |
| Gene_Symbol=H2AFY Isoform 1 of Core histone macro-H2A.1                        | 9606 | 2 |
| Gene_Symbol=H2AFY Isoform 2 of Core histone macro-H2A.1                        | 9606 | 2 |
| Gene_Symbol=H2AFY Isoform 3 of Core histone macro-H2A.1                        | 9606 | 2 |
| Gene_Symbol=H2AFY Histone H2A                                                  | 9606 | 2 |
| Gene_Symbol=H2AFY H2A histone family, member Y isoform 2 variant (Fragment     | 9606 | 2 |
| Gene_Symbol=NIPSNAP3A Protein NipSnap homolog 3A                               | 9606 | 2 |
| Gene_Symbol=RPL10A 60S ribosomal protein L10a                                  | 9606 | 3 |
| Gene_Symbol=- 15 kDa protein                                                   | 9606 | 2 |
| Gene_Symbol=- Putative uncharacterized protein ENSP00000383298                 | 9606 | 2 |
| Gene_Symbol=HNRNPA1L2 Heterogeneous nuclear ribonucleoprotein A1-like 2        | 9606 | 2 |
| Gene_Symbol=HNRNPA1 Isoform 2 of Heterogeneous nuclear ribonucleoprotein       | 9606 | 2 |
| Gene_Symbol=HNRPA1L-2 Similar to Heterogeneous nuclear ribonucleoprotein A     | 9606 | 2 |
| Gene_Symbol=HNRPA1L3 Putative heterogeneous nuclear ribonucleoprotein A1-l     | 9606 | 2 |
| Gene_Symbol=HNRNPA1 Isoform A1-A of Heterogeneous nuclear ribonucleoprot       | 9606 | 2 |
| Gene_Symbol=HNRNPA1 Isoform A1-B of Heterogeneous nuclear ribonucleoprot       | 9606 | 2 |
| Gene_Symbol=HNRNPA1 16 kDa protein                                             | 9606 | 2 |
| Gene_Symbol=- 32 kDa protein                                                   | 9606 | 2 |
| Gene_Symbol=HPRT1 Hypoxanthine-guanine phosphoribosyltransferase               | 9606 | 2 |
| Gene_Symbol=HIST1H1B Histone H1.5                                              | 9606 | 2 |
| Gene_Symbol=HNRNPK;MIR7-1 cDNA FLJ54552, highly similar to Heterogeneous       | 9606 | 2 |
| Gene_Symbol=HNRNPK;MIR7-1 Isoform 3 of Heterogeneous nuclear ribonucleop       | 9606 | 2 |
| Gene_Symbol=HNRNPK;MIR7-1 Heterogeneous nuclear ribonucleoprotein K            | 9606 | 2 |
| Gene_Symbol=HNRNPK;MIR7-1 Isoform 2 of Heterogeneous nuclear ribonucleop       | 9606 | 2 |
| Gene_Symbol=HNRNPK;MIR7-1 Isoform 1 of Heterogeneous nuclear ribonucleop       | 9606 | 2 |
| Gene_Symbol=HNRNPK;MIR7-1 Heterogeneous nuclear ribonucleoprotein K            | 9606 | 2 |
| Gene_Symbol=PFAH1B2 Platelet-activating factor acetylhydrolase IB subunit bet  | 9606 | 2 |
| Gene_Symbol=PFAH1B2 Intracellular platelet-activating factor acetylhydrolase a | 9606 | 1 |
| Gene_Symbol=TF Serotransferrin                                                 | 9606 | 2 |
| Gene_Symbol=TF 12 kDa protein                                                  | 9606 | 1 |
| Gene_Symbol=NACA nascent polypeptide-associated complex subunit alpha isofc    | 9606 | 2 |
| Gene_Symbol=NACA 24 kDa protein                                                | 9606 | 2 |
| Gene_Symbol=NACA Nascent polypeptide-associated complex subunit alpha          | 9606 | 2 |
| Gene_Symbol=- cDNA FLJ53704, moderately similar to Nascent polypeptide-asso    | 9606 | 1 |
| Gene_Symbol=NACAP1 Putative nascent polypeptide-associated complex subunit     | 9606 | 1 |
| Gene_Symbol=PSMA5 Proteasome subunit alpha type-5                              | 9606 | 1 |
| Gene_Symbol=HIST2H2BF histone H2B type 2-F isoform b                           | 9606 | 1 |
| Gene_Symbol=HIST1H2BE;HIST1H2BC;HIST1H2BI;HIST1H2BF;HIST1H2BG HIST1H:          | 9606 | 1 |
| Gene_Symbol=HIST1H2BJ Histone H2B type 1-J                                     | 9606 | 1 |
| Gene_Symbol=H2BFS Histone H2B type F-S                                         | 9606 | 1 |
| Gene_Symbol=HIST1H2BK Histone H2B type 1-K                                     | 9606 | 1 |
| Gene_Symbol=HIST1H2BE;HIST1H2BC;HIST1H2BI;HIST1H2BF;HIST1H2BG Histone          | 9606 | 1 |
| Gene_Symbol=HIST2H2BE Histone H2B type 2-E                                     | 9606 | 1 |
| Gene_Symbol=HIST1H2BD Histone H2B                                              | 9606 | 1 |
| Gene_Symbol=HIST1H2BN Histone H2B type 1-N                                     | 9606 | 1 |
| Gene_Symbol=HIST2H2BF Histone H2B                                              | 9606 | 1 |
| Gene_Symbol=HIST1H2BM Histone H2B type 1-M                                     | 9606 | 1 |

|                                                                                |      |   |
|--------------------------------------------------------------------------------|------|---|
| Gene_Symbol=HIST2H2BF Histone H2B type 2-F                                     | 9606 | 1 |
| Gene_Symbol=HIST1H2BH Histone H2B type 1-H                                     | 9606 | 1 |
| Gene_Symbol=HIST1H2BB Histone H2B type 1-B                                     | 9606 | 1 |
| Gene_Symbol=HIST1H2BD Histone H2B type 1-D                                     | 9606 | 1 |
| Gene_Symbol=HIST1H2BO Histone H2B type 1-O                                     | 9606 | 1 |
| Gene_Symbol=HIST1H2BL Histone H2B type 1-L                                     | 9606 | 1 |
| Gene_Symbol=HIST3H2BB Histone H2B type 3-B                                     | 9606 | 1 |
| Gene_Symbol=- cDNA FLJ54127, highly similar to Heterogeneous nuclear ribonuc   | 9606 | 1 |
| Gene_Symbol=HNRNPC cDNA FLJ53542, highly similar to Heterogeneous nuclear      | 9606 | 1 |
| Gene_Symbol=HNRNPC Isoform 3 of Heterogeneous nuclear ribonucleoproteins (     | 9606 | 1 |
| Gene_Symbol=HNRNPC Isoform C2 of Heterogeneous nuclear ribonucleoproteins      | 9606 | 1 |
| Gene_Symbol=HNRNPC Isoform C1 of Heterogeneous nuclear ribonucleoproteins      | 9606 | 1 |
| Gene_Symbol=IDI1 Isoform 1 of Isopentenyl-diphosphate Delta-isomerase 1        | 9606 | 1 |
| Gene_Symbol=IDI1 Isoform 2 of Isopentenyl-diphosphate Delta-isomerase 1        | 9606 | 1 |
| Gene_Symbol=PSMA2 Proteasome subunit alpha type-2                              | 9606 | 1 |
| Gene_Symbol=PSMA2 5 kDa protein                                                | 9606 | 1 |
| Gene_Symbol=PSMA2 4 kDa protein                                                | 9606 | 1 |
| Gene_Symbol=SNORD38B;RPS8;SNORD55 Ribosomal protein S8                         | 9606 | 1 |
| Gene_Symbol=SNORD38B;RPS8;SNORD55 40S ribosomal protein S8                     | 9606 | 1 |
| Gene_Symbol=NUDT21 Cleavage and polyadenylation specificity factor subunit 5   | 9606 | 1 |
| Gene_Symbol=NUDT21 Putative uncharacterized protein DKFZp313O211               | 9606 | 1 |
| Gene_Symbol=LMNB2 Lamin-B2                                                     | 9606 | 1 |
| Gene_Symbol=LMNB2 Lamin-B2                                                     | 9606 | 1 |
| Gene_Symbol=PAFAH1B3 Platelet-activating factor acetylhydrolase IB subunit gan | 9606 | 1 |
| Gene_Symbol=C1QBP Complement component 1 Q subcomponent-binding prote          | 9606 | 1 |
| Gene_Symbol=C1QBP 20 kDa protein                                               | 9606 | 1 |
| Gene_Symbol=SNRPA1 U2 snRNP-specific A' protein                                | 9606 | 1 |
| Gene_Symbol=SNRPA1 cDNA FLJ75425, highly similar to Homo sapiens small nucl    | 9606 | 1 |
| Gene_Symbol=SNRPA1 U2 small nuclear ribonucleoprotein A'                       | 9606 | 1 |
| Gene_Symbol=ALB Isoform 1 of Serum albumin                                     | 9606 | 1 |
| Gene_Symbol=ALB Putative uncharacterized protein ALB                           | 9606 | 1 |
| Gene_Symbol=ALB 69 kDa protein                                                 | 9606 | 1 |
| Gene_Symbol=ALB cDNA FLJ50830, highly similar to Serum albumin                 | 9606 | 1 |
| Gene_Symbol=ALB Putative uncharacterized protein ALB                           | 9606 | 1 |
| Gene_Symbol=ALB Protein                                                        | 9606 | 1 |
| Gene_Symbol=ALB 52 kDa protein                                                 | 9606 | 1 |
| Gene_Symbol=ALB ALB protein                                                    | 9606 | 1 |
| Gene_Symbol=ALB Putative uncharacterized protein ALB                           | 9606 | 1 |
| Gene_Symbol=ALB Isoform 2 of Serum albumin                                     | 9606 | 1 |
| Gene_Symbol=HIST1H4E;HIST1H4A;HIST1H4I;HIST4H4;HIST1H4F;HIST2H4A;HIST1         | 9606 | 1 |
| Gene_Symbol=HMGB3 21 kDa protein                                               | 9606 | 1 |
| Gene_Symbol=HMGB3 22 kDa protein                                               | 9606 | 1 |
| Gene_Symbol=HMGB3 High mobility group protein B3                               | 9606 | 1 |
| Gene_Symbol=HMGB3 Non-histone chromosomal protein                              | 9606 | 1 |
| Gene_Symbol=LOC729595 similar to high mobility group box 3 isoform 2           | 9606 | 1 |
| Gene_Symbol=LOC646993 similar to high mobility group box 3                     | 9606 | 1 |
| Gene_Symbol=LOC646993 similar to high mobility group box 3                     | 9606 | 1 |
| Gene_Symbol=HMGB3L1 Putative high mobility group protein B3-like-1             | 9606 | 1 |
| Gene_Symbol=- 22 kDa protein                                                   | 9606 | 1 |

|                                                                              |      |   |
|------------------------------------------------------------------------------|------|---|
| Gene_Symbol=LOC729595 similar to high mobility group box 3                   | 9606 | 1 |
| Gene_Symbol=LOC729595 similar to high mobility group box 3 isoform 1         | 9606 | 1 |
| Gene_Symbol=NPM1 nucleophosmin isoform 3                                     | 9606 | 1 |
| Gene_Symbol=NPM1 Isoform 1 of Nucleophosmin                                  | 9606 | 1 |
| Gene_Symbol=NPM1 Isoform 2 of Nucleophosmin                                  | 9606 | 1 |
| Gene_Symbol=LOC349114 cDNA FLJ40085 fis, clone TESTI2002993                  | 9606 | 1 |
| Gene_Symbol=RALA Ras-related protein Ral-A                                   | 9606 | 1 |
| Gene_Symbol=RALA Protein                                                     | 9606 | 1 |
| Gene_Symbol=PTBP1 Isoform 2 of Polypyrimidine tract-binding protein 1        | 9606 | 1 |
| Gene_Symbol=PTBP1 polypyrimidine tract-binding protein 1 isoform a           | 9606 | 1 |
| Gene_Symbol=PTBP1 Isoform 1 of Polypyrimidine tract-binding protein 1        | 9606 | 1 |
| Gene_Symbol=TPD52 Putative uncharacterized protein TPD52                     | 9606 | 1 |
| Gene_Symbol=TPD52 Prostate leucine zipper variant 1                          | 9606 | 1 |
| Gene_Symbol=TPD52 Prostate leucine zipper isoform 5                          | 9606 | 1 |
| Gene_Symbol=TPD52 Putative uncharacterized protein TPD52                     | 9606 | 1 |
| Gene_Symbol=TPD52 Isoform 3 of Tumor protein D52                             | 9606 | 1 |
| Gene_Symbol=TPD52 Isoform 1 of Tumor protein D52                             | 9606 | 1 |
| Gene_Symbol=DCXR 26 kDa protein                                              | 9606 | 1 |
| Gene_Symbol=DCXR 26 kDa protein                                              | 9606 | 1 |
| Gene_Symbol=DCXR L-xylulose reductase                                        | 9606 | 1 |
| Gene_Symbol=ARHGDI A 26 kDa protein                                          | 9606 | 1 |
| Gene_Symbol=ARHGDI A 28 kDa protein                                          | 9606 | 1 |
| Gene_Symbol=ARHGDI A 9 kDa protein                                           | 9606 | 1 |
| Gene_Symbol=ARHGDI A Rho GDP-dissociation inhibitor 1                        | 9606 | 1 |
| Gene_Symbol=ARHGDI A 22 kDa protein                                          | 9606 | 1 |
| Gene_Symbol=PSMA7 Isoform 2 of Proteasome subunit alpha type-7               | 9606 | 1 |
| Gene_Symbol=PSMA7 Isoform 1 of Proteasome subunit alpha type-7               | 9606 | 1 |
| Gene_Symbol=PSMA8 Isoform 3 of Proteasome subunit alpha type-7-like          | 9606 | 1 |
| Gene_Symbol=PSMA8 Isoform 2 of Proteasome subunit alpha type-7-like          | 9606 | 1 |
| Gene_Symbol=PSMA8 Isoform 1 of Proteasome subunit alpha type-7-like          | 9606 | 1 |
| Gene_Symbol=HSD17B10 Hydroxysteroid (17-beta) dehydrogenase 10               | 9606 | 1 |
| Gene_Symbol=HSD17B10 Isoform 2 of 3-hydroxyacyl-CoA dehydrogenase type-2     | 9606 | 1 |
| Gene_Symbol=HSD17B10 Isoform 1 of 3-hydroxyacyl-CoA dehydrogenase type-2     | 9606 | 1 |
| Gene_Symbol=NDUFS3 NADH dehydrogenase [ubiquinone] iron-sulfur protein 3,    | 9606 | 1 |
| Gene_Symbol=HIST1H1D Histone H1.3                                            | 9606 | 2 |
| Gene_Symbol=HIST1H1E Histone H1.4                                            | 9606 | 2 |
| Gene_Symbol=HIST1H1C Histone H1.2                                            | 9606 | 2 |
| Gene_Symbol=GSTO1 Glutathione S-transferase omega 1                          | 9606 | 1 |
| Gene_Symbol=GSTO1 Glutathione S-transferase omega-1                          | 9606 | 1 |
| Gene_Symbol=PSMA6 Proteasome subunit alpha type-6                            | 9606 | 1 |
| Gene_Symbol=PSMA6 Similar to Prosomal P27K protein                           | 9606 | 1 |
| Gene_Symbol=HNRNPA2B1 Putative uncharacterized protein HNRNPA2B1             | 9606 | 1 |
| Gene_Symbol=HNRNPA2B1 Isoform A2 of Heterogeneous nuclear ribonucleoprot     | 9606 | 1 |
| Gene_Symbol=HNRNPA2B1 Isoform B1 of Heterogeneous nuclear ribonucleoprot     | 9606 | 1 |
| Gene_Symbol=PCBP1 Poly(rC)-binding protein 1                                 | 9606 | 1 |
| Gene_Symbol=PARP1 cDNA FLJ53442, highly similar to Poly (ADP-ribose) polymer | 9606 | 1 |
| Gene_Symbol=PARP1 Poly [ADP-ribose] polymerase 1                             | 9606 | 1 |
| Gene_Symbol=LGALS3 Galectin-3                                                | 9606 | 1 |
| Gene_Symbol=LMNB1 Lamin-B1                                                   | 9606 | 1 |



|                                        |      |   |
|----------------------------------------|------|---|
| Gene_Symbol=LMNB1 LMNB1 protein        | 9606 | 1 |
| Gene_Symbol=YWHAQ 14-3-3 protein theta | 9606 | 2 |

| Name                                                                      | Species | Peptides(95) |
|---------------------------------------------------------------------------|---------|--------------|
| Gene_Symbol=TAGLN2 24 kDa protein                                         | 9606    | 12           |
| Gene_Symbol=TAGLN2 Transgelin-2                                           | 9606    | 12           |
| Gene_Symbol=TAGLN2 21 kDa protein                                         | 9606    | 11           |
| Gene_Symbol=PRDX1 Peroxiredoxin-1                                         | 9606    | 8            |
| Gene_Symbol=PRDX1 19 kDa protein                                          | 9606    | 8            |
| Gene_Symbol=PPIB Peptidyl-prolyl cis-trans isomerase B                    | 9606    | 9            |
| Gene_Symbol=PEBP1 Phosphatidylethanolamine-binding protein 1              | 9606    | 8            |
| Gene_Symbol=PEBP1 22 kDa protein                                          | 9606    | 8            |
| Gene_Symbol=PRDX2 Peroxiredoxin-2                                         | 9606    | 5            |
| Gene_Symbol=PRDX2 cDNA FLJ60461, highly similar to Peroxiredoxin-2        | 9606    | 5            |
| Gene_Symbol=PRDX2 Putative uncharacterized protein PRDX2                  | 9606    | 4            |
| Gene_Symbol=- cDNA FLJ51435, moderately similar to Cofilin-1              | 9606    | 6            |
| Gene_Symbol=CFL1 Cofilin-1                                                | 9606    | 6            |
| Gene_Symbol=PARK7 Protein DJ-1                                            | 9606    | 4            |
| Gene_Symbol=RPS9 40S ribosomal protein S9                                 | 9606    | 2            |
| Gene_Symbol=HIST1H4E;HIST1H4A;HIST1H4I;HIST4H4;HIST1H4F;HIST2H4A;HIST1H4J | 9606    | 4            |
| Gene_Symbol=KRT19 Keratin, type I cytoskeletal 19                         | 9606    | 3            |
| Gene_Symbol=JUP cDNA FLJ60424, highly similar to Junction plakoglobin     | 9606    | 2            |
| Gene_Symbol=PRDX6 Peroxiredoxin-6                                         | 9606    | 3            |
| Gene_Symbol=TF Serotransferrin                                            | 9606    | 3            |
| Gene_Symbol=PSMB6 20 kDa protein                                          | 9606    | 3            |
| Gene_Symbol=PSMB6 Proteasome subunit beta type-6                          | 9606    | 3            |
| Gene_Symbol=PSMB6 12 kDa protein                                          | 9606    | 2            |
| Gene_Symbol=PSMB1 Proteasome subunit beta type-1                          | 9606    | 2            |
| Gene_Symbol=PRDX3 thioredoxin-dependent peroxide reductase, mitochondrial | 9606    | 2            |
| Gene_Symbol=PRDX3 Thioredoxin-dependent peroxide reductase, mitochondrial | 9606    | 2            |
| Gene_Symbol=RPL12 Isoform 1 of 60S ribosomal protein L12                  | 9606    | 2            |
| Gene_Symbol=RPL12P38 Pseudogene candidate                                 | 9606    | 2            |
| Gene_Symbol=PSMB5 Proteasome subunit beta type-5                          | 9606    | 2            |
| Gene_Symbol=PSMB5 proteasome subunit beta type-5 isoform 2                | 9606    | 2            |
| Gene_Symbol=HIST1H2BD Histone H2B                                         | 9606    | 3            |
| Gene_Symbol=HIST2H2BF histone H2B type 2-F isoform b                      | 9606    | 3            |
| Gene_Symbol=HIST1H2BE;HIST1H2BC;HIST1H2BI;HIST1H2BF;HIST1H2BG HIST1H2B    | 9606    | 3            |
| Gene_Symbol=HIST1H2BN Histone H2B type 1-N                                | 9606    | 3            |
| Gene_Symbol=HIST2H2BF Histone H2B                                         | 9606    | 3            |
| Gene_Symbol=HIST1H2BM Histone H2B type 1-M                                | 9606    | 3            |
| Gene_Symbol=H2BFS Histone H2B type F-S                                    | 9606    | 3            |
| Gene_Symbol=HIST1H2BK Histone H2B type 1-K                                | 9606    | 3            |
| Gene_Symbol=HIST2H2BF Histone H2B type 2-F                                | 9606    | 3            |
| Gene_Symbol=HIST1H2BH Histone H2B type 1-H                                | 9606    | 3            |
| Gene_Symbol=HIST1H2BD Histone H2B type 1-D                                | 9606    | 3            |
| Gene_Symbol=HIST1H2BE;HIST1H2BC;HIST1H2BI;HIST1H2BF;HIST1H2BG Histone     | 9606    | 3            |
| Gene_Symbol=HIST1H2BL Histone H2B type 1-L                                | 9606    | 3            |
| Gene_Symbol=HIST1H2BJ Histone H2B type 1-J                                | 9606    | 3            |

|                                                                              |      |   |
|------------------------------------------------------------------------------|------|---|
| Gene_Symbol=HIST1H2BB Histone H2B type 1-B                                   | 9606 | 3 |
| Gene_Symbol=HIST1H2BO Histone H2B type 1-O                                   | 9606 | 3 |
| Gene_Symbol=HIST2H2BE Histone H2B type 2-E                                   | 9606 | 3 |
| Gene_Symbol=HIST3H2BB Histone H2B type 3-B                                   | 9606 | 3 |
| Gene_Symbol=KRT8 Keratin, type II cytoskeletal 8                             | 9606 | 2 |
| Gene_Symbol=LOC728638 Similar to Keratin, type II cytoskeletal 8             | 9606 | 2 |
| Gene_Symbol=KRT8 27 kDa protein                                              | 9606 | 2 |
| Gene_Symbol=KRT8 17 kDa protein                                              | 9606 | 1 |
| Gene_Symbol=- cDNA FLJ54127, highly similar to Heterogeneous nuclear ribonuc | 9606 | 2 |
| Gene_Symbol=HNRNPC cDNA FLJ53542, highly similar to Heterogeneous nuclear    | 9606 | 2 |
| Gene_Symbol=HNRNPC Isoform 3 of Heterogeneous nuclear ribonucleoproteins (   | 9606 | 2 |
| Gene_Symbol=HNRNPC Isoform C2 of Heterogeneous nuclear ribonucleoproteins    | 9606 | 2 |
| Gene_Symbol=HNRNPC Isoform C1 of Heterogeneous nuclear ribonucleoproteins    | 9606 | 2 |
| Gene_Symbol=LOC649330;HNRNPCL1 LOC649330 protein                             | 9606 | 1 |
| Gene_Symbol=LOC440563 heterogeneous nuclear ribonucleoprotein C-like         | 9606 | 1 |
| Gene_Symbol=HNRNPCL1 Heterogeneous nuclear ribonucleoprotein C-like 1        | 9606 | 1 |
| Gene_Symbol=HNRNPC Isoform 4 of Heterogeneous nuclear ribonucleoproteins (   | 9606 | 1 |
| Gene_Symbol=DUT deoxyuridine 5'-triphosphate nucleotidohydrolase, mitochonr  | 9606 | 2 |
| Gene_Symbol=DUT 24 kDa protein                                               | 9606 | 2 |
| Gene_Symbol=DUT Isoform 3 of Deoxyuridine 5'-triphosphate nucleotidohydrola: | 9606 | 2 |
| Gene_Symbol=DUT Isoform 2 of Deoxyuridine 5'-triphosphate nucleotidohydrola: | 9606 | 2 |
| Gene_Symbol=DUT Isoform 1 of Deoxyuridine 5'-triphosphate nucleotidohydrola: | 9606 | 2 |
| Gene_Symbol=RAB7A Ras-related protein Rab-7a                                 | 9606 | 2 |
| Gene_Symbol=RAB7A Putative uncharacterized protein RAB7A                     | 9606 | 2 |
| Gene_Symbol=RAB7A Putative uncharacterized protein RAB7A                     | 9606 | 1 |
| Gene_Symbol=RAB7A Putative uncharacterized protein RAB7A                     | 9606 | 1 |
| Gene_Symbol=RAB7A Putative uncharacterized protein RAB7A                     | 9606 | 1 |
| Gene_Symbol=RAB7A Putative uncharacterized protein RAB7A                     | 9606 | 1 |
| Gene_Symbol=SRP14 Signal recognition particle 14 kDa protein                 | 9606 | 2 |
| Gene_Symbol=- Putative uncharacterized protein ENSP00000397549               | 9606 | 1 |
| Gene_Symbol=SRP14 10 kDa protein                                             | 9606 | 1 |
| Gene_Symbol=SRP14 8 kDa protein                                              | 9606 | 1 |
| Gene_Symbol=PSMB2 Proteasome subunit beta type-2                             | 9606 | 2 |
| Gene_Symbol=HIST1H1B Histone H1.5                                            | 9606 | 2 |
| Gene_Symbol=RPL11 Isoform 2 of 60S ribosomal protein L11                     | 9606 | 1 |
| Gene_Symbol=RPL11 Isoform 1 of 60S ribosomal protein L11                     | 9606 | 1 |
| Gene_Symbol=RPL11 Ribosomal protein L11                                      | 9606 | 1 |
| Gene_Symbol=RPL11 Ribosomal protein L11                                      | 9606 | 1 |
| Gene_Symbol=- 15 kDa protein                                                 | 9606 | 1 |
| Gene_Symbol=RPL26 60S ribosomal protein L26                                  | 9606 | 1 |
| Gene_Symbol=RPL26 13 kDa protein                                             | 9606 | 1 |
| Gene_Symbol=RPL26 Putative uncharacterized protein RPL26                     | 9606 | 1 |
| Gene_Symbol=RPL26 8 kDa protein                                              | 9606 | 1 |
| Gene_Symbol=KRT18 Keratin, type I cytoskeletal 18                            | 9606 | 1 |
| Gene_Symbol=KRT18 15 kDa protein                                             | 9606 | 1 |
| Gene_Symbol=- Putative uncharacterized protein ENSP00000396184               | 9606 | 1 |
| Gene_Symbol=KRT18 11 kDa protein                                             | 9606 | 1 |
| Gene_Symbol=HIST1H2AJ;HIST1H2AG;HIST1H2AI;HIST1H2AL;HIST1H2AK;HIST1H:        | 9606 | 1 |
| Gene_Symbol=HIST1H2AD Histone H2A type 1-D                                   | 9606 | 1 |

|                                                                              |      |   |
|------------------------------------------------------------------------------|------|---|
| Gene_Symbol=HIST1H2AH;HIST1H2AJ;HIST1H2AG;HIST1H2AI;HIST1H2AL;HIST1H         | 9606 | 1 |
| Gene_Symbol=HIST1H2AB;HIST1H2AE;HIST1H2AJ;HIST1H2AG;HIST1H2AI;HIST1H         | 9606 | 1 |
| Gene_Symbol=HIST1H2AJ;HIST1H2AG;HIST1H2AI;HIST1H2AL;HIST1H2AK;HIST1H:        | 9606 | 1 |
| Gene_Symbol=H2AFX Histone H2A.x                                              | 9606 | 1 |
| Gene_Symbol=HIST2H2AA4;HIST2H2AA3 Histone H2A type 2-A                       | 9606 | 1 |
| Gene_Symbol=HIST1H2AC Histone H2A type 1-C                                   | 9606 | 1 |
| Gene_Symbol=HIST3H2A Histone H2A type 3                                      | 9606 | 1 |
| Gene_Symbol=HIST2H2AC Histone H2A type 2-C                                   | 9606 | 1 |
| Gene_Symbol=H2AFJ Isoform 1 of Histone H2A.J                                 | 9606 | 1 |
| Gene_Symbol=HIST2H2AB Histone H2A type 2-B                                   | 9606 | 1 |
| Gene_Symbol=HIST1H2AA Histone H2A type 1-A                                   | 9606 | 1 |
| Gene_Symbol=H2AFJ Histone H2A                                                | 9606 | 1 |
| Gene_Symbol=HIST1H3E;HIST1H3A;HIST1H3H;HIST1H3I;HIST1H3J;HIST1H3F;HIST       | 9606 | 1 |
| Gene_Symbol=HIST3H3 Histone H3.1t                                            | 9606 | 1 |
| Gene_Symbol=HIST2H3A;HIST2H3C;HIST2H3D Histone H3.2                          | 9606 | 1 |
| Gene_Symbol=- Histone H3                                                     | 9606 | 1 |
| Gene_Symbol=LOC440926;LOC644914;H3F3A;H3F3B Histone H3                       | 9606 | 1 |
| Gene_Symbol=LOC440926;LOC644914;H3F3A;H3F3B Histone H3.3                     | 9606 | 1 |
| Gene_Symbol=- 13 kDa protein                                                 | 9606 | 1 |
| Gene_Symbol=LOC440926;LOC644914;H3F3A;H3F3B Histone H3                       | 9606 | 1 |
| Gene_Symbol=H3F3C Histone H3-like                                            | 9606 | 1 |
| Gene_Symbol=LOC440926;LOC644914;H3F3A;H3F3B Histone H3 (Fragment)            | 9606 | 1 |
| Gene_Symbol=LOC644950 similar to histone H3.3B                               | 9606 | 1 |
| Gene_Symbol=- 11 kDa protein                                                 | 9606 | 1 |
| Gene_Symbol=- cDNA FLJ57768, highly similar to Ras-related protein Rab-1A    | 9606 | 1 |
| Gene_Symbol=RAB1A 19 kDa protein                                             | 9606 | 1 |
| Gene_Symbol=RAB1B RAB1B protein                                              | 9606 | 1 |
| Gene_Symbol=RAB1A Isoform 2 of Ras-related protein Rab-1A                    | 9606 | 1 |
| Gene_Symbol=RAB1A Isoform 3 of Ras-related protein Rab-1A                    | 9606 | 1 |
| Gene_Symbol=RAB1B Ras-related protein Rab-1B                                 | 9606 | 1 |
| Gene_Symbol=RAB1A Isoform 1 of Ras-related protein Rab-1A                    | 9606 | 1 |
| Gene_Symbol=RAB1A 23 kDa protein                                             | 9606 | 1 |
| Gene_Symbol=RAB1C Putative Ras-related protein Rab-1C                        | 9606 | 1 |
| Gene_Symbol=RAB1B Putative small GTP-binding protein                         | 9606 | 1 |
| Gene_Symbol=RAB35 18 kDa protein                                             | 9606 | 1 |
| Gene_Symbol=RAB8A Ras-related protein Rab-8A                                 | 9606 | 1 |
| Gene_Symbol=RAB35 ras-related protein Rab-35 isoform 2                       | 9606 | 1 |
| Gene_Symbol=RAB35 cDNA FLJ57794, moderately similar to Ras-related protein f | 9606 | 1 |
| Gene_Symbol=- cDNA FLJ53028, highly similar to Ras-related protein Rab-8A    | 9606 | 1 |
| Gene_Symbol=RAB15 Isoform 1 of Ras-related protein Rab-15                    | 9606 | 1 |
| Gene_Symbol=RAB15 Isoform 2 of Ras-related protein Rab-15                    | 9606 | 1 |
| Gene_Symbol=RAB35 Ras-related protein Rab-35                                 | 9606 | 1 |
| Gene_Symbol=RAB8B Ras-related protein Rab-8B                                 | 9606 | 1 |
| Gene_Symbol=- HCG1996054, isoform CRA_d                                      | 9606 | 1 |
| Gene_Symbol=- 13 kDa protein                                                 | 9606 | 1 |
| Gene_Symbol=RAB8B cDNA FLJ38125 fis, clone D6OST2000127, moderately simil    | 9606 | 1 |
| Gene_Symbol=LOC100131294 similar to RAB13, member RAS oncogene family        | 9606 | 1 |
| Gene_Symbol=RAB8B 10 kDa protein                                             | 9606 | 1 |
| Gene_Symbol=RAB8B 6 kDa protein                                              | 9606 | 1 |

|                                                                                 |      |   |
|---------------------------------------------------------------------------------|------|---|
| Gene_Symbol=RAB8A Mel transforming oncogene variant (Fragment)                  | 9606 | 1 |
| Gene_Symbol=RAB10 Ras-related protein Rab-10                                    | 9606 | 1 |
| Gene_Symbol=RAB13 Ras-related protein Rab-13                                    | 9606 | 1 |
| Gene_Symbol=H2AFY Isoform 1 of Core histone macro-H2A.1                         | 9606 | 1 |
| Gene_Symbol=H2AFY Isoform 2 of Core histone macro-H2A.1                         | 9606 | 1 |
| Gene_Symbol=H2AFY Isoform 3 of Core histone macro-H2A.1                         | 9606 | 1 |
| Gene_Symbol=H2AFY Histone H2A                                                   | 9606 | 1 |
| Gene_Symbol=H2AFY H2A histone family, member Y isoform 2 variant (Fragment)     | 9606 | 1 |
| Gene_Symbol=PSMB8 Proteasome (Prosome, macropain) subunit, beta type, 8         | 9606 | 1 |
| Gene_Symbol=PSMB8 proteasome subunit beta type-8 isoform E2 proprotein          | 9606 | 1 |
| Gene_Symbol=PSMB8 Proteasome (Prosome, macropain) subunit, beta type, 8         | 9606 | 1 |
| Gene_Symbol=PSMB8 Isoform 1 of Proteasome subunit beta type-8                   | 9606 | 1 |
| Gene_Symbol=PSMB8 Isoform 2 of Proteasome subunit beta type-8                   | 9606 | 1 |
| Gene_Symbol=RPS5 40S ribosomal protein S5                                       | 9606 | 1 |
| Gene_Symbol=UBE2L3 Ubiquitin carrier protein                                    | 9606 | 1 |
| Gene_Symbol=UBE2L3 Ubiquitin-conjugating enzyme E2 L3                           | 9606 | 1 |
| Gene_Symbol=UBE2L3 Ubiquitin carrier protein                                    | 9606 | 1 |
| Gene_Symbol=SFRS3 cDNA FLJ52832, highly similar to Splicing factor, arginine/se | 9606 | 1 |
| Gene_Symbol=SFRS3 Splicing factor, arginine/serine-rich 3                       | 9606 | 1 |
| Gene_Symbol=RPL23A;SNORD4A Ribosomal protein L23a, isoform CRA_a                | 9606 | 1 |
| Gene_Symbol=- 18 kDa protein                                                    | 9606 | 1 |
| Gene_Symbol=RPL23A;SNORD4A Protein                                              | 9606 | 1 |
| Gene_Symbol=RPL23A;SNORD4A Putative uncharacterized protein RPL23A              | 9606 | 1 |
| Gene_Symbol=RPL23A;SNORD4A 60S ribosomal protein L23a                           | 9606 | 1 |
| Gene_Symbol=- Putative uncharacterized protein                                  | 9606 | 1 |
| Gene_Symbol=PSME3 Isoform 2 of Proteasome activator complex subunit 3           | 9606 | 1 |
| Gene_Symbol=PSME3 Isoform 1 of Proteasome activator complex subunit 3           | 9606 | 1 |
| Gene_Symbol=CBX3 Putative uncharacterized protein CBX3                          | 9606 | 1 |
| Gene_Symbol=CBX3 Putative uncharacterized protein CBX3                          | 9606 | 1 |
| Gene_Symbol=CBX3 Chromobox protein homolog 3                                    | 9606 | 1 |
| Gene_Symbol=HNRNPA2B1 Putative uncharacterized protein HNRNPA2B1                | 9606 | 1 |
| Gene_Symbol=HNRNPA2B1 Isoform A2 of Heterogeneous nuclear ribonucleoprot        | 9606 | 1 |
| Gene_Symbol=HNRNPA2B1 Isoform B1 of Heterogeneous nuclear ribonucleoprot        | 9606 | 1 |
| Gene_Symbol=APRT adenine phosphoribosyltransferase isoform b                    | 9606 | 1 |
| Gene_Symbol=APRT Adenine phosphoribosyltransferase                              | 9606 | 1 |
| Gene_Symbol=- cDNA FLJ51245, highly similar to Actin-related protein 2/3 compl  | 9606 | 1 |
| Gene_Symbol=ARPC3 21 kDa protein                                                | 9606 | 1 |
| Gene_Symbol=ARPC3 6 kDa protein                                                 | 9606 | 1 |
| Gene_Symbol=ARPC3 Putative uncharacterized protein ARPC3                        | 9606 | 1 |
| Gene_Symbol=ARPC3 Actin-related protein 2/3 complex subunit 3                   | 9606 | 1 |
| Gene_Symbol=RPL27A 60S ribosomal protein L27a                                   | 9606 | 1 |
| Gene_Symbol=RBMXL2 RNA-binding motif protein, X-linked-like-2                   | 9606 | 1 |
| Gene_Symbol=RBMX Heterogeneous nuclear ribonucleoprotein G                      | 9606 | 1 |
| Gene_Symbol=RBMX heterogeneous nuclear ribonucleoprotein G isoform 2            | 9606 | 1 |
| Gene_Symbol=RBMXL3 RNA-binding motif protein, X-linked-like-3                   | 9606 | 1 |
| Gene_Symbol=RBMXL1 RNA binding motif protein, X-linked-like 1                   | 9606 | 1 |
| Gene_Symbol=RBMXL1 RNA binding motif protein, X-linked-like 1                   | 9606 | 1 |
| Gene_Symbol=PRDX4 Putative uncharacterized protein PRDX4                        | 9606 | 2 |
| Gene_Symbol=LOC100292021 similar to thioredoxin peroxidase                      | 9606 | 2 |

|                                                        |      |   |
|--------------------------------------------------------|------|---|
| Gene_Symbol=PRDX4 Protein                              | 9606 | 2 |
| Gene_Symbol=PRDX4 Peroxiredoxin-4                      | 9606 | 2 |
| Gene_Symbol=RPS15 40S ribosomal protein S15            | 9606 | 1 |
| Gene_Symbol=RPS10 Ribosomal protein S10                | 9606 | 1 |
| Gene_Symbol=RPS10 40S ribosomal protein S10            | 9606 | 1 |
| Gene_Symbol=- 15 kDa protein                           | 9606 | 1 |
| Gene_Symbol=- 22 kDa protein                           | 9606 | 0 |
| Gene_Symbol=RPS7 40S ribosomal protein S7              | 9606 | 0 |
| Gene_Symbol=- 19 kDa protein                           | 9606 | 0 |
| Gene_Symbol=- 18 kDa protein                           | 9606 | 0 |
| Gene_Symbol=RPS7 Putative uncharacterized protein RPS7 | 9606 | 0 |
| Gene_Symbol=KRT1 Keratin, type II cytoskeletal 1       | 9606 | 1 |
| Gene_Symbol=PSMB3 Proteasome subunit beta type-3       | 9606 | 1 |

| Name                                                                         | Species | Peptides(95 |
|------------------------------------------------------------------------------|---------|-------------|
| Gene_Symbol=PPIA Peptidyl-prolyl cis-trans isomerase A                       | 9606    | 8           |
| Gene_Symbol=NME1-NME2;NME1;NME2 Isoform 3 of Nucleoside diphosphate k        | 9606    | 6           |
| Gene_Symbol=NME1-NME2;NME1;NME2 Nucleoside diphosphate kinase                | 9606    | 6           |
| Gene_Symbol=NME1-NME2;NME1;NME2 Isoform 1 of Nucleoside diphosphate k        | 9606    | 5           |
| Gene_Symbol=HIST1H4E;HIST1H4A;HIST1H4I;HIST4H4;HIST1H4F;HIST2H4A;HIST1       | 9606    | 6           |
| Gene_Symbol=ANP32B Isoform 2 of Acidic leucine-rich nuclear phosphoprotein 3 | 9606    | 6           |
| Gene_Symbol=ANP32B Isoform 1 of Acidic leucine-rich nuclear phosphoprotein 3 | 9606    | 6           |
| Gene_Symbol=RPS19 40S ribosomal protein S19                                  | 9606    | 3           |
| Gene_Symbol=SOD1 Superoxide dismutase [Cu-Zn]                                | 9606    | 4           |
| Gene_Symbol=SOD1 Superoxide dismutase                                        | 9606    | 3           |
| Gene_Symbol=HIST2H2BF histone H2B type 2-F isoform b                         | 9606    | 6           |
| Gene_Symbol=HIST1H2BE;HIST1H2BC;HIST1H2BI;HIST1H2BF;HIST1H2BG HIST1H:        | 9606    | 6           |
| Gene_Symbol=HIST2H2BF Histone H2B                                            | 9606    | 6           |
| Gene_Symbol=H2BFS Histone H2B type F-S                                       | 9606    | 6           |
| Gene_Symbol=HIST1H2BK Histone H2B type 1-K                                   | 9606    | 6           |
| Gene_Symbol=HIST2H2BF Histone H2B type 2-F                                   | 9606    | 6           |
| Gene_Symbol=HIST1H2BH Histone H2B type 1-H                                   | 9606    | 6           |
| Gene_Symbol=HIST1H2BE;HIST1H2BC;HIST1H2BI;HIST1H2BF;HIST1H2BG Histone        | 9606    | 6           |
| Gene_Symbol=HIST1H2BL Histone H2B type 1-L                                   | 9606    | 6           |
| Gene_Symbol=HIST1H2BM Histone H2B type 1-M                                   | 9606    | 6           |
| Gene_Symbol=HIST1H2BN Histone H2B type 1-N                                   | 9606    | 6           |
| Gene_Symbol=HIST1H2BD Histone H2B type 1-D                                   | 9606    | 6           |
| Gene_Symbol=HIST1H2BD Histone H2B                                            | 9606    | 6           |
| Gene_Symbol=HIST1H3E;HIST1H3A;HIST1H3H;HIST1H3I;HIST1H3J;HIST1H3F;HIST       | 9606    | 2           |
| Gene_Symbol=HIST2H3A;HIST2H3C;HIST2H3D Histone H3.2                          | 9606    | 2           |
| Gene_Symbol=- Histone H3                                                     | 9606    | 2           |
| Gene_Symbol=HIST3H3 Histone H3.1t                                            | 9606    | 2           |
| Gene_Symbol=LOC440926;LOC644914;H3F3A;H3F3B Histone H3                       | 9606    | 1           |
| Gene_Symbol=LOC440926;LOC644914;H3F3A;H3F3B Histone H3.3                     | 9606    | 1           |
| Gene_Symbol=LOC440926;LOC644914;H3F3A;H3F3B Histone H3                       | 9606    | 1           |
| Gene_Symbol=LOC440926;LOC644914;H3F3A;H3F3B Histone H3 (Fragment)            | 9606    | 1           |
| Gene_Symbol=ARPC4;TTLL3 21 kDa protein                                       | 9606    | 3           |
| Gene_Symbol=TTLL3;ARPC4 Putative uncharacterized protein ARPC4               | 9606    | 3           |

|                                                                              |      |   |
|------------------------------------------------------------------------------|------|---|
| Gene_Symbol=ARPC4;TLL3 Actin-related protein 2/3 complex subunit 4           | 9606 | 3 |
| Gene_Symbol=TLL3;ARPC4 13 kDa protein                                        | 9606 | 3 |
| Gene_Symbol=TLL3 Similar to Actin-related protein 2/3 complex subunit 4      | 9606 | 3 |
| Gene_Symbol=TLL3 Protein                                                     | 9606 | 3 |
| Gene_Symbol=ARPC4 17 kDa protein                                             | 9606 | 3 |
| Gene_Symbol=TLL3 cDNA FLJ14048 fis, clone HEMBA1006650, weakly similar to    | 9606 | 3 |
| Gene_Symbol=ARPC4;TLL3 5 kDa protein                                         | 9606 | 2 |
| Gene_Symbol=HIST1H1D Histone H1.3                                            | 9606 | 3 |
| Gene_Symbol=HIST1H1C Histone H1.2                                            | 9606 | 3 |
| Gene_Symbol=HIST1H1E Histone H1.4                                            | 9606 | 3 |
| Gene_Symbol=- cDNA FLJ56786, moderately similar to 40S ribosomal protein S16 | 9606 | 2 |
| Gene_Symbol=RPS16 40S ribosomal protein S16                                  | 9606 | 2 |
| Gene_Symbol=RPS16 RPS16 protein                                              | 9606 | 2 |
| Gene_Symbol=SRP14 Signal recognition particle 14 kDa protein                 | 9606 | 3 |
| Gene_Symbol=SRP14 9 kDa protein                                              | 9606 | 2 |
| Gene_Symbol=RPS23 40S ribosomal protein S23                                  | 9606 | 2 |
| Gene_Symbol=RPS23 15 kDa protein                                             | 9606 | 1 |
| Gene_Symbol=RPS23 15 kDa protein                                             | 9606 | 1 |
| Gene_Symbol=RPS25 40S ribosomal protein S25                                  | 9606 | 2 |
| Gene_Symbol=HIST1H2AJ;HIST1H2AG;HIST1H2AI;HIST1H2AL;HIST1H2AK;HIST1H:        | 9606 | 1 |
| Gene_Symbol=HIST2H2AC Histone H2A type 2-C                                   | 9606 | 1 |
| Gene_Symbol=HIST1H2AJ;HIST1H2AG;HIST1H2AI;HIST1H2AL;HIST1H2AK;HIST1H:        | 9606 | 1 |
| Gene_Symbol=HIST1H2AD Histone H2A type 1-D                                   | 9606 | 1 |
| Gene_Symbol=HIST2H2AA4;HIST2H2AA3 Histone H2A type 2-A                       | 9606 | 1 |
| Gene_Symbol=HIST1H2AH;HIST1H2AJ;HIST1H2AG;HIST1H2AI;HIST1H2AL;HIST1H         | 9606 | 1 |
| Gene_Symbol=H2AFJ Isoform 1 of Histone H2A.J                                 | 9606 | 1 |
| Gene_Symbol=H2AFX Histone H2A.x                                              | 9606 | 1 |
| Gene_Symbol=HIST1H2AC Histone H2A type 1-C                                   | 9606 | 1 |
| Gene_Symbol=HIST3H2A Histone H2A type 3                                      | 9606 | 1 |
| Gene_Symbol=HIST1H2AB;HIST1H2AE;HIST1H2AJ;HIST1H2AG;HIST1H2AI;HIST1H         | 9606 | 1 |
| Gene_Symbol=HIST1H2AA Histone H2A type 1-A                                   | 9606 | 1 |
| Gene_Symbol=H2AFJ Histone H2A                                                | 9606 | 1 |
| Gene_Symbol=HIST2H2AB Histone H2A type 2-B                                   | 9606 | 1 |
| Gene_Symbol=H2AFJ Isoform 2 of Histone H2A.J                                 | 9606 | 0 |
| Gene_Symbol=KRT19 Keratin, type I cytoskeletal 19                            | 9606 | 1 |
| Gene_Symbol=JUP cDNA FLJ60424, highly similar to Junction plakoglobin        | 9606 | 1 |
| Gene_Symbol=KRT19 25 kDa protein                                             | 9606 | 1 |
| Gene_Symbol=RPS14 40S ribosomal protein S14                                  | 9606 | 2 |
| Gene_Symbol=RPL27 60S ribosomal protein L27                                  | 9606 | 1 |
| Gene_Symbol=RPL27 60S ribosomal protein L27                                  | 9606 | 1 |
| Gene_Symbol=DSTN Destrin                                                     | 9606 | 2 |
| Gene_Symbol=LOC100287016 hypothetical protein XP_002342890                   | 9606 | 1 |
| Gene_Symbol=LOC729454 similar to Destrin                                     | 9606 | 1 |
| Gene_Symbol=LOC171220 Pseudogene candidate                                   | 9606 | 1 |
| Gene_Symbol=DSTN destrin isoform b                                           | 9606 | 1 |
| Gene_Symbol=LOC729454 similar to destrin                                     | 9606 | 1 |
| Gene_Symbol=LOC729454 similar to Destrin                                     | 9606 | 1 |
| Gene_Symbol=HIST1H1B Histone H1.5                                            | 9606 | 2 |
| Gene_Symbol=ARF4 ADP-ribosylation factor 4                                   | 9606 | 2 |

|                                                                              |      |   |
|------------------------------------------------------------------------------|------|---|
| Gene_Symbol=ARF1 cDNA FLJ61099, highly similar to ADP-ribosylation factor 1  | 9606 | 1 |
| Gene_Symbol=ARF4 Putative uncharacterized protein ARF4                       | 9606 | 2 |
| Gene_Symbol=ARF3 cDNA FLJ57770, moderately similar to ADP-ribosylation factc | 9606 | 1 |
| Gene_Symbol=ARF3 ADP-ribosylation factor 3                                   | 9606 | 1 |
| Gene_Symbol=ARF1 ADP-ribosylation factor 1                                   | 9606 | 1 |
| Gene_Symbol=ARF1 cDNA FLJ51902, highly similar to ADP-ribosylation factor 1  | 9606 | 1 |
| Gene_Symbol=- cDNA FLJ51215, highly similar to ADP-ribosylation factor 1     | 9606 | 1 |
| Gene_Symbol=- cDNA FLJ51495, highly similar to ADP-ribosylation factor 5     | 9606 | 1 |
| Gene_Symbol=ARF5 Putative uncharacterized protein ARF5                       | 9606 | 1 |
| Gene_Symbol=ARF5 ADP-ribosylation factor 5                                   | 9606 | 1 |
| Gene_Symbol=ARF4 Putative uncharacterized protein ARF4                       | 9606 | 1 |
| Gene_Symbol=ARF4 7 kDa protein                                               | 9606 | 1 |
| Gene_Symbol=ARF4 6 kDa protein                                               | 9606 | 1 |
| Gene_Symbol=ARF3 13 kDa protein                                              | 9606 | 1 |
| Gene_Symbol=UBE2V1 42 kDa protein                                            | 9606 | 1 |
| Gene_Symbol=UBE2V1 Isoform 3 of Ubiquitin-conjugating enzyme E2 variant 1    | 9606 | 1 |
| Gene_Symbol=UBE2V1 Isoform 2 of Ubiquitin-conjugating enzyme E2 variant 1    | 9606 | 1 |
| Gene_Symbol=TMEM189-UBE2V1 TMEM189-UBE2V1 readthrough transcript             | 9606 | 1 |
| Gene_Symbol=UBE2V1 Isoform 5 of Ubiquitin-conjugating enzyme E2 variant 1    | 9606 | 1 |
| Gene_Symbol=UBE2V1 Isoform 1 of Ubiquitin-conjugating enzyme E2 variant 1    | 9606 | 1 |
| Gene_Symbol=UBE2V1 Ubiquitin-conjugating enzyme E2 variant 1                 | 9606 | 1 |
| Gene_Symbol=UBE2V2 12 kDa protein                                            | 9606 | 1 |
| Gene_Symbol=UBE2V2 Ubiquitin-conjugating enzyme E2 variant 2                 | 9606 | 1 |
| Gene_Symbol=UBE2V2 16 kDa protein                                            | 9606 | 1 |
| Gene_Symbol=- 10 kDa protein                                                 | 9606 | 1 |
| Gene_Symbol=EIF5A1;EIF5A Eukaryotic translation initiation factor 5A-1-like  | 9606 | 1 |
| Gene_Symbol=EIF5A Isoform 1 of Eukaryotic translation initiation factor 5A-1 | 9606 | 1 |
| Gene_Symbol=EIF5A Isoform 2 of Eukaryotic translation initiation factor 5A-1 | 9606 | 1 |
| Gene_Symbol=C6orf15 STG protein                                              | 9606 | 1 |
| Gene_Symbol=- 34 kDa protein                                                 | 9606 | 1 |
| Gene_Symbol=C6orf15 Uncharacterized protein C6orf15                          | 9606 | 1 |
| Gene_Symbol=LOC729687 similar to high-mobility group nucleosomal binding do  | 9606 | 1 |
| Gene_Symbol=LOC100288691 hypothetical protein XP_002343066                   | 9606 | 1 |
| Gene_Symbol=LOC100293829 similar to hCG2040565                               | 9606 | 1 |
| Gene_Symbol=LOC100287582 hypothetical protein XP_002342251                   | 9606 | 1 |
| Gene_Symbol=HMGN2 Non-histone chromosomal protein HMG-17                     | 9606 | 1 |
| Gene_Symbol=RPS18;RPS18P9 40S ribosomal protein S18                          | 9606 | 0 |
| Gene_Symbol=- 17 kDa protein                                                 | 9606 | 0 |
| Gene_Symbol=- 18 kDa protein                                                 | 9606 | 0 |
| Gene_Symbol=- Putative uncharacterized protein ENSP00000391831               | 9606 | 1 |
| Gene_Symbol=KRT18 Keratin, type I cytoskeletal 18                            | 9606 | 1 |
| Gene_Symbol=KRT18 15 kDa protein                                             | 9606 | 1 |
| Gene_Symbol=KRT18 7 kDa protein                                              | 9606 | 1 |
| Gene_Symbol=UBE2N 11 kDa protein                                             | 9606 | 1 |
| Gene_Symbol=UBE2N Ubiquitin-conjugating enzyme E2 N                          | 9606 | 1 |
| Gene_Symbol=UBE2N 16 kDa protein                                             | 9606 | 1 |
| Gene_Symbol=UBE2NL Putative ubiquitin-conjugating enzyme E2 N-like           | 9606 | 1 |
| Gene_Symbol=UBE2I Ubiquitin carrier protein                                  | 9606 | 1 |
| Gene_Symbol=UBE2I SUMO-conjugating enzyme UBC9                               | 9606 | 1 |

| Gene_Symbol=RPS13 40S ribosomal protein S13                                  | 9606    | 0           |
|------------------------------------------------------------------------------|---------|-------------|
| Name                                                                         | Species | Peptides(95 |
| Gene_Symbol=NME1-NME2;NME1;NME2 Isoform 3 of Nucleoside diphosphate k        | 9606    | 4           |
| Gene_Symbol=NME1-NME2;NME1;NME2 Nucleoside diphosphate kinase                | 9606    | 4           |
| Gene_Symbol=NME1-NME2;NME1;NME2 Isoform 1 of Nucleoside diphosphate k        | 9606    | 4           |
| Gene_Symbol=PFN1 Profilin-1                                                  | 9606    | 5           |
| Gene_Symbol=HIST1H4E;HIST1H4A;HIST1H4I;HIST4H4;HIST1H4F;HIST2H4A;HIST1       | 9606    | 4           |
| Gene_Symbol=SUB1 Activated RNA polymerase II transcriptional coactivator p15 | 9606    | 3           |
| Gene_Symbol=SUB1 cDNA FLJ51816, highly similar to Activated RNA polymerase   | 9606    | 3           |
| Gene_Symbol=SUB1 9 kDa protein                                               | 9606    | 3           |
| Gene_Symbol=H2AFV 18 kDa protein                                             | 9606    | 3           |
| Gene_Symbol=H2AFV Histone H2A.V                                              | 9606    | 3           |
| Gene_Symbol=- 13 kDa protein                                                 | 9606    | 3           |
| Gene_Symbol=H2AFZ Histone H2A.Z                                              | 9606    | 3           |
| Gene_Symbol=H2AFV histone H2A.V isoform 3                                    | 9606    | 2           |
| Gene_Symbol=H2AFV histone H2A.V isoform 5                                    | 9606    | 2           |
| Gene_Symbol=H2AFV Histone H2A                                                | 9606    | 2           |
| Gene_Symbol=H2AFV histone H2A.V isoform 2                                    | 9606    | 2           |
| Gene_Symbol=UBE2N 16 kDa protein                                             | 9606    | 2           |
| Gene_Symbol=UBE2N Ubiquitin-conjugating enzyme E2 N                          | 9606    | 2           |
| Gene_Symbol=UBE2NL Putative ubiquitin-conjugating enzyme E2 N-like           | 9606    | 2           |
| Gene_Symbol=- 11 kDa protein                                                 | 9606    | 2           |
| Gene_Symbol=RPL22 60S ribosomal protein L22                                  | 9606    | 2           |
| Gene_Symbol=FABP5 Fatty acid-binding protein, epidermal                      | 9606    | 2           |
| Gene_Symbol=- 15 kDa protein                                                 | 9606    | 2           |
| Gene_Symbol=RPS20 40S ribosomal protein S20 isoform 1                        | 9606    | 2           |
| Gene_Symbol=RPS20 40S ribosomal protein S20                                  | 9606    | 2           |
| Gene_Symbol=RPS20 7 kDa protein                                              | 9606    | 1           |
| Gene_Symbol=RPS26P11 Putative 40S ribosomal protein S26-like 1               | 9606    | 2           |
| Gene_Symbol=- 13 kDa protein                                                 | 9606    | 2           |
| Gene_Symbol=RPS26 40S ribosomal protein S26                                  | 9606    | 2           |
| Gene_Symbol=- 13 kDa protein                                                 | 9606    | 2           |
| Gene_Symbol=RBP1 retinol-binding protein 1 isoform a                         | 9606    | 1           |
| Gene_Symbol=RBP1 Retinol-binding protein 1                                   | 9606    | 1           |
| Gene_Symbol=RBP1 retinol-binding protein 1 isoform c                         | 9606    | 1           |
| Gene_Symbol=RBP1 retinol-binding protein 1 isoform b                         | 9606    | 1           |
| Gene_Symbol=RBP1 17 kDa protein                                              | 9606    | 1           |
| Gene_Symbol=RBP1 10 kDa protein                                              | 9606    | 0           |
| Gene_Symbol=- Truncated beta-globin                                          | 9606    | 2           |
| Gene_Symbol=HBD Beta-globin gene from a thalassemia patient                  | 9606    | 2           |
| Gene_Symbol=HBB Hemoglobin (Fragment)                                        | 9606    | 2           |
| Gene_Symbol=HBB Hemoglobin subunit beta                                      | 9606    | 2           |
| Gene_Symbol=SNRPD3 Small nuclear ribonucleoprotein Sm D3                     | 9606    | 1           |
| Gene_Symbol=SNRPD3 19 kDa protein                                            | 9606    | 1           |
| Gene_Symbol=SNRPD3 cDNA FLJ51872, highly similar to Small nuclear ribonuclec | 9606    | 1           |
| Gene_Symbol=RPL30 13 kDa protein                                             | 9606    | 1           |
| Gene_Symbol=RPL30 60S ribosomal protein L30                                  | 9606    | 1           |



|                                                                              |      |   |
|------------------------------------------------------------------------------|------|---|
| Gene_Symbol=RPL30 6 kDa protein                                              | 9606 | 1 |
| Gene_Symbol=SUMO2 10 kDa protein                                             | 9606 | 1 |
| Gene_Symbol=SUMO2 SMT3 suppressor of mif two 3 homolog 2 isoform b precu     | 9606 | 1 |
| Gene_Symbol=SUMO2 Small ubiquitin-related modifier 2                         | 9606 | 1 |
| Gene_Symbol=LOC728825 Putative uncharacterized protein ENSP00000391266       | 9606 | 1 |
| Gene_Symbol=SUMO4 Small ubiquitin-related modifier 4                         | 9606 | 1 |
| Gene_Symbol=SUMO3 SMT3 suppressor of mif two 3 homolog 3 (Yeast), isoform    | 9606 | 1 |
| Gene_Symbol=SUMO3 cDNA FLJ57440, moderately similar to Small ubiquitin-rela  | 9606 | 1 |
| Gene_Symbol=SUMO3 Putative uncharacterized protein SUMO3                     | 9606 | 1 |
| Gene_Symbol=SUMO3 Small ubiquitin-related modifier 3                         | 9606 | 1 |
| Gene_Symbol=- cDNA FLJ56786, moderately similar to 40S ribosomal protein S16 | 9606 | 1 |
| Gene_Symbol=RPS16 40S ribosomal protein S16                                  | 9606 | 1 |
| Gene_Symbol=RPS16 RPS16 protein                                              | 9606 | 1 |
| Gene_Symbol=HIST1H2BE;HIST1H2BC;HIST1H2BI;HIST1H2BF;HIST1H2BG HIST1H:        | 9606 | 2 |
| Gene_Symbol=HIST1H2BN Histone H2B type 1-N                                   | 9606 | 2 |
| Gene_Symbol=H2BFS Histone H2B type F-S                                       | 9606 | 2 |
| Gene_Symbol=HIST1H2BK Histone H2B type 1-K                                   | 9606 | 2 |
| Gene_Symbol=HIST1H2BE;HIST1H2BC;HIST1H2BI;HIST1H2BF;HIST1H2BG Histone        | 9606 | 2 |
| Gene_Symbol=HIST1H2BD Histone H2B                                            | 9606 | 2 |
| Gene_Symbol=HIST2H2BF histone H2B type 2-F isoform b                         | 9606 | 2 |
| Gene_Symbol=HIST2H2BF Histone H2B                                            | 9606 | 2 |
| Gene_Symbol=HIST1H2BM Histone H2B type 1-M                                   | 9606 | 2 |
| Gene_Symbol=HIST2H2BF Histone H2B type 2-F                                   | 9606 | 2 |
| Gene_Symbol=HIST1H2BH Histone H2B type 1-H                                   | 9606 | 2 |
| Gene_Symbol=HIST1H2BD Histone H2B type 1-D                                   | 9606 | 2 |
| Gene_Symbol=HIST1H2BL Histone H2B type 1-L                                   | 9606 | 2 |
| Gene_Symbol=HIST1H2BJ Histone H2B type 1-J                                   | 9606 | 2 |
| Gene_Symbol=HIST2H2BE Histone H2B type 2-E                                   | 9606 | 2 |
| Gene_Symbol=HIST1H2BA Histone H2B type 1-A                                   | 9606 | 2 |
| Gene_Symbol=HIST1H2BB Histone H2B type 1-B                                   | 9606 | 2 |
| Gene_Symbol=HIST1H2BO Histone H2B type 1-O                                   | 9606 | 2 |
| Gene_Symbol=HIST3H2BB Histone H2B type 3-B                                   | 9606 | 2 |
| Gene_Symbol=TF 12 kDa protein                                                | 9606 | 1 |
| Gene_Symbol=TF Serotransferrin                                               | 9606 | 1 |
| Gene_Symbol=NME1-NME2;NME1;NME2 Isoform 2 of Nucleoside diphosphate k        | 9606 | 4 |
| Gene_Symbol=NME1-NME2;NME1;NME2 Isoform 1 of Nucleoside diphosphate k        | 9606 | 4 |
| Gene_Symbol=NME1-NME2;NME1;NME2 9 kDa protein                                | 9606 | 2 |
| Gene_Symbol=HIST1H1E Histone H1.4                                            | 9606 | 1 |
| Gene_Symbol=HIST1H1D Histone H1.3                                            | 9606 | 1 |
| Gene_Symbol=HIST1H1C Histone H1.2                                            | 9606 | 1 |
| Gene_Symbol=LOC100287582 hypothetical protein XP_002342251                   | 9606 | 1 |
| Gene_Symbol=LOC729687 similar to high-mobility group nucleosomal binding do  | 9606 | 1 |
| Gene_Symbol=LOC100288691 hypothetical protein XP_002343066                   | 9606 | 1 |
| Gene_Symbol=LOC100293829 similar to hCG2040565                               | 9606 | 1 |
| Gene_Symbol=HMGN2 Non-histone chromosomal protein HMG-17                     | 9606 | 1 |
| Gene_Symbol=UBE2D3 16 kDa protein                                            | 9606 | 1 |
| Gene_Symbol=UBE2D3 Isoform 2 of Ubiquitin-conjugating enzyme E2 D3           | 9606 | 1 |
| Gene_Symbol=UBE2D3 Isoform 3 of Ubiquitin-conjugating enzyme E2 D3           | 9606 | 1 |
| Gene_Symbol=UBE2D2 Ubiquitin-conjugating enzyme E2 D2                        | 9606 | 1 |

|                                                                              |      |   |
|------------------------------------------------------------------------------|------|---|
| Gene_Symbol=UBE2D3 Isoform 1 of Ubiquitin-conjugating enzyme E2 D3           | 9606 | 1 |
| Gene_Symbol=UBE2D2 11 kDa protein                                            | 9606 | 1 |
| Gene_Symbol=UBE2D3 14 kDa protein                                            | 9606 | 1 |
| Gene_Symbol=UBE2D3 8 kDa protein                                             | 9606 | 1 |
| Gene_Symbol=UBE2D2 ubiquitin-conjugating enzyme E2 D2 isoform 2              | 9606 | 1 |
| Gene_Symbol=RPS19 40S ribosomal protein S19                                  | 9606 | 1 |
| Gene_Symbol=COX4I1 COX4I1 protein                                            | 9606 | 1 |
| Gene_Symbol=COX4I1 Cytochrome c oxidase subunit 4 isoform 1, mitochondrial   | 9606 | 1 |
| Gene_Symbol=HIST3H3 Histone H3.1t                                            | 9606 | 1 |
| Gene_Symbol=LOC440926;LOC644914;H3F3A;H3F3B Histone H3                       | 9606 | 1 |
| Gene_Symbol=HIST1H3E;HIST1H3A;HIST1H3H;HIST1H3I;HIST1H3J;HIST1H3F;HIST       | 9606 | 1 |
| Gene_Symbol=LOC440926;LOC644914;H3F3A;H3F3B Histone H3.3                     | 9606 | 1 |
| Gene_Symbol=HIST2H3A;HIST2H3C;HIST2H3D Histone H3.2                          | 9606 | 1 |
| Gene_Symbol=LOC440926;LOC644914;H3F3A;H3F3B Histone H3                       | 9606 | 1 |
| Gene_Symbol=H3F3C Histone H3-like                                            | 9606 | 1 |
| Gene_Symbol=- Histone H3                                                     | 9606 | 1 |
| Gene_Symbol=- 13 kDa protein                                                 | 9606 | 1 |
| Gene_Symbol=LOC440926;LOC644914;H3F3A;H3F3B Histone H3 (Fragment)            | 9606 | 1 |
| Gene_Symbol=LOC644950 similar to histone H3.3B                               | 9606 | 1 |
| Gene_Symbol=- 11 kDa protein                                                 | 9606 | 1 |
| Gene_Symbol=PMP2 Myelin P2 protein                                           | 9606 | 1 |
| Gene_Symbol=HIST1H2AC Histone H2A type 1-C                                   | 9606 | 2 |
| Gene_Symbol=HIST3H2A Histone H2A type 3                                      | 9606 | 2 |
| Gene_Symbol=HIST1H2AB;HIST1H2AE;HIST1H2AJ;HIST1H2AG;HIST1H2AI;HIST1H         | 9606 | 2 |
| Gene_Symbol=RPL31 Putative uncharacterized protein RPL31                     | 9606 | 1 |
| Gene_Symbol=RPL31 cDNA FLJ57527, highly similar to 60S ribosomal protein L31 | 9606 | 1 |
| Gene_Symbol=RPL31 Protein                                                    | 9606 | 1 |
| Gene_Symbol=RPL31 cDNA FLJ58908, highly similar to 60S ribosomal protein L31 | 9606 | 1 |
| Gene_Symbol=RPL31 Putative uncharacterized protein RPL31                     | 9606 | 1 |
| Gene_Symbol=RPL31 60S ribosomal protein L31 isoform 3                        | 9606 | 1 |
| Gene_Symbol=RPL31 60S ribosomal protein L31 isoform 2                        | 9606 | 1 |
| Gene_Symbol=RPL31 60S ribosomal protein L31                                  | 9606 | 1 |
| Gene_Symbol=ZNF207 Zinc finger, C2H2-type domain containing protein          | 9606 | 1 |
| Gene_Symbol=ZNF207 zinc finger protein 207 isoform c                         | 9606 | 1 |
| Gene_Symbol=ZNF207 Putative uncharacterized protein ZNF207                   | 9606 | 1 |
| Gene_Symbol=ZNF207 Isoform 2 of Zinc finger protein 207                      | 9606 | 1 |
| Gene_Symbol=ZNF207 Isoform 1 of Zinc finger protein 207                      | 9606 | 1 |
| Gene_Symbol=HBA2;HBA1 Hemoglobin subunit alpha                               | 9606 | 1 |
| Gene_Symbol=H1F0 Histone H1.0                                                | 9606 | 0 |
| Gene_Symbol=C19orf10 UPF0556 protein C19orf10                                | 9606 | 1 |
| Gene_Symbol=RBMX cDNA FLJ34201 fis, clone FCBBF3019714, highly similar to H  | 9606 | 0 |
| Gene_Symbol=RBMX cDNA FLJ38696 fis, clone KIDNE2001931, highly similar to H  | 9606 | 0 |
| Gene_Symbol=RBMX Heterogeneous nuclear ribonucleoprotein G                   | 9606 | 0 |

| Name                                                 | Species | Peptides(95) |
|------------------------------------------------------|---------|--------------|
| Gene_Symbol=PFN1 Profilin-1                          | 9606    | 15           |
| Gene_Symbol=KRT1 Keratin, type II cytoskeletal 1     | 9606    | 5            |
| Gene_Symbol=RBP1 retinol-binding protein 1 isoform a | 9606    | 5            |

|                                                                        |      |   |
|------------------------------------------------------------------------|------|---|
| Gene_Symbol=RBP1 Retinol-binding protein 1                             | 9606 | 5 |
| Gene_Symbol=RBP1 retinol-binding protein 1 isoform c                   | 9606 | 5 |
| Gene_Symbol=RBP1 retinol-binding protein 1 isoform b                   | 9606 | 5 |
| Gene_Symbol=RBP1 17 kDa protein                                        | 9606 | 5 |
| Gene_Symbol=HIST1H4E;HIST1H4A;HIST1H4I;HIST4H4;HIST1H4F;HIST2H4A;HIST1 | 9606 | 5 |
| Gene_Symbol=HIST2H2BF histone H2B type 2-F isoform b                   | 9606 | 5 |
| Gene_Symbol=HIST1H2BN Histone H2B type 1-N                             | 9606 | 5 |
| Gene_Symbol=HIST2H2BF Histone H2B                                      | 9606 | 5 |
| Gene_Symbol=HIST2H2BF Histone H2B type 2-F                             | 9606 | 5 |
| Gene_Symbol=HIST1H2BH Histone H2B type 1-H                             | 9606 | 5 |
| Gene_Symbol=HIST1H2BD Histone H2B                                      | 9606 | 5 |
| Gene_Symbol=HIST1H2BE;HIST1H2BC;HIST1H2BI;HIST1H2BF;HIST1H2BG HIST1H:  | 9606 | 5 |
| Gene_Symbol=HIST1H2BM Histone H2B type 1-M                             | 9606 | 5 |
| Gene_Symbol=H2BFS Histone H2B type F-S                                 | 9606 | 5 |
| Gene_Symbol=HIST1H2BK Histone H2B type 1-K                             | 9606 | 5 |
| Gene_Symbol=HIST1H2BD Histone H2B type 1-D                             | 9606 | 5 |
| Gene_Symbol=HIST1H2BE;HIST1H2BC;HIST1H2BI;HIST1H2BF;HIST1H2BG Histone  | 9606 | 5 |
| Gene_Symbol=HIST1H2BL Histone H2B type 1-L                             | 9606 | 5 |
| Gene_Symbol=RPL30 13 kDa protein                                       | 9606 | 3 |
| Gene_Symbol=RPL30 60S ribosomal protein L30                            | 9606 | 3 |
| Gene_Symbol=HBB Hemoglobin subunit beta                                | 9606 | 2 |
| Gene_Symbol=HBD Hemoglobin subunit delta                               | 9606 | 1 |
| Gene_Symbol=- Truncated beta-globin                                    | 9606 | 1 |
| Gene_Symbol=HBD Beta-globin gene from a thalassemia patient            | 9606 | 1 |
| Gene_Symbol=HBB Hemoglobin (Fragment)                                  | 9606 | 1 |
| Gene_Symbol=RPS12 40S ribosomal protein S12                            | 9606 | 2 |
| Gene_Symbol=HIST1H2AJ;HIST1H2AG;HIST1H2AI;HIST1H2AL;HIST1H2AK;HIST1H:  | 9606 | 1 |
| Gene_Symbol=HIST2H2AC Histone H2A type 2-C                             | 9606 | 1 |
| Gene_Symbol=HIST1H2AJ;HIST1H2AG;HIST1H2AI;HIST1H2AL;HIST1H2AK;HIST1H:  | 9606 | 1 |
| Gene_Symbol=HIST1H2AD Histone H2A type 1-D                             | 9606 | 1 |
| Gene_Symbol=HIST2H2AA4;HIST2H2AA3 Histone H2A type 2-A                 | 9606 | 1 |
| Gene_Symbol=HIST1H2AH;HIST1H2AJ;HIST1H2AG;HIST1H2AI;HIST1H2AL;HIST1H   | 9606 | 1 |
| Gene_Symbol=H2AFJ Isoform 1 of Histone H2A.J                           | 9606 | 1 |
| Gene_Symbol=H2AFX Histone H2A.x                                        | 9606 | 1 |
| Gene_Symbol=HIST1H2AC Histone H2A type 1-C                             | 9606 | 1 |
| Gene_Symbol=HIST1H2AA Histone H2A type 1-A                             | 9606 | 1 |
| Gene_Symbol=HIST3H2A Histone H2A type 3                                | 9606 | 1 |
| Gene_Symbol=HIST1H2AB;HIST1H2AE;HIST1H2AJ;HIST1H2AG;HIST1H2AI;HIST1H   | 9606 | 1 |
| Gene_Symbol=HIST2H2AB Histone H2A type 2-B                             | 9606 | 1 |
| Gene_Symbol=H2AFJ Histone H2A                                          | 9606 | 1 |
| Gene_Symbol=H2AFJ Isoform 2 of Histone H2A.J                           | 9606 | 0 |
| Gene_Symbol=FABP5 Fatty acid-binding protein, epidermal                | 9606 | 1 |
| Gene_Symbol=- 15 kDa protein                                           | 9606 | 1 |
| Gene_Symbol=TBCA Tubulin-specific chaperone A                          | 9606 | 2 |
| Gene_Symbol=CST3 Cystatin-C                                            | 9606 | 3 |
| Gene_Symbol=KRT9 Keratin, type I cytoskeletal 9                        | 9606 | 1 |
| Gene_Symbol=KRT10 Keratin, type I cytoskeletal 10                      | 9606 | 1 |
| Gene_Symbol=RPS15A 40S ribosomal protein S15a                          | 9606 | 1 |
| Gene_Symbol=LOC100288781 hypothetical protein XP_002343613             | 9606 | 1 |

|                                                                               |      |   |
|-------------------------------------------------------------------------------|------|---|
| Gene_Symbol=HBA2;HBA1 Hemoglobin subunit alpha                                | 9606 | 1 |
| Gene_Symbol=LOC440926;LOC644914;H3F3A;H3F3B Histone H3                        | 9606 | 1 |
| Gene_Symbol=HIST1H3E;HIST1H3A;HIST1H3H;HIST1H3I;HIST1H3J;HIST1H3F;HIST        | 9606 | 1 |
| Gene_Symbol=LOC440926;LOC644914;H3F3A;H3F3B Histone H3.3                      | 9606 | 1 |
| Gene_Symbol=HIST3H3 Histone H3.1t                                             | 9606 | 1 |
| Gene_Symbol=HIST2H3A;HIST2H3C;HIST2H3D Histone H3.2                           | 9606 | 1 |
| Gene_Symbol=LOC440926;LOC644914;H3F3A;H3F3B Histone H3                        | 9606 | 1 |
| Gene_Symbol=H3F3C Histone H3-like                                             | 9606 | 1 |
| Gene_Symbol=- Histone H3                                                      | 9606 | 1 |
| Gene_Symbol=- 13 kDa protein                                                  | 9606 | 1 |
| Gene_Symbol=LOC440926;LOC644914;H3F3A;H3F3B Histone H3 (Fragment)             | 9606 | 1 |
| Gene_Symbol=LOC644950 similar to histone H3.3B                                | 9606 | 1 |
| Gene_Symbol=- 11 kDa protein                                                  | 9606 | 1 |
| Gene_Symbol=SNRPD3 19 kDa protein                                             | 9606 | 1 |
| Gene_Symbol=SNRPD3 cDNA FLJ51872, highly similar to Small nuclear ribonucleoc | 9606 | 1 |
| Gene_Symbol=SNRPD3 Small nuclear ribonucleoprotein Sm D3                      | 9606 | 1 |
| Gene_Symbol=ACTG1 cDNA FLJ57283, highly similar to Actin, cytoplasmic 2       | 9606 | 1 |
| Gene_Symbol=ACTB Beta actin variant (Fragment)                                | 9606 | 1 |
| Gene_Symbol=ACTB;ACTG1 cDNA FLJ52842, highly similar to Actin, cytoplasmic 1  | 9606 | 1 |
| Gene_Symbol=ACTG1 Actin, cytoplasmic 2                                        | 9606 | 1 |
| Gene_Symbol=ACTB Actin, cytoplasmic 1                                         | 9606 | 1 |
| Gene_Symbol=LOC653269;POTEL;POTEM;LOC727848;POTEJ;POTEKP;POTEE;LOC6           | 9606 | 1 |
| Gene_Symbol=POTEF POTE ankyrin domain family member F                         | 9606 | 1 |
| Gene_Symbol=LOC653269;POTEL;POTEM;LOC727848;POTEJ;POTEKP;POTEE;LOC6           | 9606 | 1 |
| Gene_Symbol=LOC653269;POTEL;POTEM;LOC727848;POTEJ;POTEKP;POTEE;LOC6           | 9606 | 1 |
| Gene_Symbol=SNRPD1 Small nuclear ribonucleoprotein Sm D1                      | 9606 | 1 |
| Gene_Symbol=LOC100129492 similar to small nuclear ribonucleoprotein D1 poly   | 9606 | 1 |
| Gene_Symbol=SSBP1 Putative uncharacterized protein SSBP1                      | 9606 | 1 |
| Gene_Symbol=SSBP1 16 kDa protein                                              | 9606 | 1 |
| Gene_Symbol=SSBP1 cDNA FLJ51825, highly similar to Single-stranded DNA-bindi  | 9606 | 1 |
| Gene_Symbol=SSBP1 Single-stranded DNA-binding protein, mitochondrial          | 9606 | 1 |
| Gene_Symbol=SUMO3 cDNA FLJ57440, moderately similar to Small ubiquitin-rela   | 9606 | 1 |
| Gene_Symbol=SUMO3 Putative uncharacterized protein SUMO3                      | 9606 | 1 |
| Gene_Symbol=SUMO3 SMT3 suppressor of mif two 3 homolog 3 (Yeast), isoform     | 9606 | 1 |
| Gene_Symbol=SUMO2 10 kDa protein                                              | 9606 | 1 |
| Gene_Symbol=SUMO2 SMT3 suppressor of mif two 3 homolog 2 isoform b precu      | 9606 | 1 |
| Gene_Symbol=SUMO4 Small ubiquitin-related modifier 4                          | 9606 | 1 |
| Gene_Symbol=SUMO2 Small ubiquitin-related modifier 2                          | 9606 | 1 |
| Gene_Symbol=SUMO3 Small ubiquitin-related modifier 3                          | 9606 | 1 |
| Gene_Symbol=LOC728825 Putative uncharacterized protein ENSP00000391266        | 9606 | 1 |
| Gene_Symbol=CYCS Putative uncharacterized protein CYCS                        | 9606 | 1 |
| Gene_Symbol=CYCS Cytochrome c                                                 | 9606 | 1 |
| Gene_Symbol=CST1 Cystatin-SN                                                  | 9606 | 1 |
| Gene_Symbol=CST4 Cystatin-S                                                   | 9606 | 1 |

|                                                                    |      |   |
|--------------------------------------------------------------------|------|---|
| Gene_Symbol=RPLP2 60S acidic ribosomal protein P2                  | 9606 | 1 |
| Gene_Symbol=RPS20 40S ribosomal protein S20 isoform 1              | 9606 | 1 |
| Gene_Symbol=RPS20 7 kDa protein                                    | 9606 | 1 |
| Gene_Symbol=RPS20 40S ribosomal protein S20                        | 9606 | 1 |
| Gene_Symbol=RPS20 Pseudogene candidate                             | 9606 | 1 |
| Gene_Symbol=SNRPD2 Small nuclear ribonucleoprotein Sm D2           | 9606 | 1 |
| Gene_Symbol=SNRPD2 small nuclear ribonucleoprotein Sm D2 isoform 2 | 9606 | 1 |
| Gene_Symbol=FKBP2 Peptidyl-prolyl cis-trans isomerase FKBP2        | 9606 | 1 |

| Name                                                                      | Species | Peptides(95) |
|---------------------------------------------------------------------------|---------|--------------|
| Gene_Symbol=HIST1H4E;HIST1H4A;HIST1H4I;HIST4H4;HIST1H4F;HIST2H4A;HIST1H4J | 9606    | 6            |
| Gene_Symbol=KRT1 Keratin, type II cytoskeletal 1                          | 9606    | 2            |
| Gene_Symbol=NPM1 Isoform 1 of Nucleophosmin                               | 9606    | 2            |
| Gene_Symbol=NPM1 nucleophosmin isoform 3                                  | 9606    | 2            |
| Gene_Symbol=- 20 kDa protein                                              | 9606    | 1            |
| Gene_Symbol=NPM1 Putative uncharacterized protein                         | 9606    | 1            |
| Gene_Symbol=NPM1 Isoform 2 of Nucleophosmin                               | 9606    | 1            |
| Gene_Symbol=CYCS Putative uncharacterized protein CYCS                    | 9606    | 2            |
| Gene_Symbol=CYCS Cytochrome c                                             | 9606    | 2            |
| Gene_Symbol=- 12 kDa protein                                              | 9606    | 2            |
| Gene_Symbol=HIST1H2AJ;HIST1H2AG;HIST1H2AI;HIST1H2AL;HIST1H2AK;HIST1H2AM   | 9606    | 0            |
| Gene_Symbol=HIST2H2AC Histone H2A type 2-C                                | 9606    | 0            |
| Gene_Symbol=HIST1H2AJ;HIST1H2AG;HIST1H2AI;HIST1H2AL;HIST1H2AK;HIST1H2AM   | 9606    | 0            |
| Gene_Symbol=HIST1H2AD Histone H2A type 1-D                                | 9606    | 0            |
| Gene_Symbol=H2AFJ Isoform 1 of Histone H2A.J                              | 9606    | 0            |
| Gene_Symbol=HIST2H2AA4;HIST2H2AA3 Histone H2A type 2-A                    | 9606    | 0            |
| Gene_Symbol=H2AFJ Isoform 2 of Histone H2A.J                              | 9606    | 0            |
| Gene_Symbol=HIST1H2AH;HIST1H2AJ;HIST1H2AG;HIST1H2AI;HIST1H2AL;HIST1H2AM   | 9606    | 0            |
| Gene_Symbol=H2AFX Histone H2A.x                                           | 9606    | 0            |
| Gene_Symbol=HIST1H2AC Histone H2A type 1-C                                | 9606    | 0            |
| Gene_Symbol=HIST1H2AA Histone H2A type 1-A                                | 9606    | 0            |
| Gene_Symbol=HIST3H2A Histone H2A type 3                                   | 9606    | 0            |
| Gene_Symbol=HIST1H2AB;HIST1H2AE;HIST1H2AJ;HIST1H2AG;HIST1H2AI;HIST1H2AM   | 9606    | 0            |
| Gene_Symbol=H2AFJ Histone H2A                                             | 9606    | 0            |
| Gene_Symbol=H2AFV Histone H2A                                             | 9606    | 0            |
| Gene_Symbol=H2AFV 18 kDa protein                                          | 9606    | 0            |
| Gene_Symbol=- 13 kDa protein                                              | 9606    | 0            |
| Gene_Symbol=H2AFZ Histone H2A.Z                                           | 9606    | 0            |
| Gene_Symbol=H2AFV histone H2A.V isoform 2                                 | 9606    | 0            |
| Gene_Symbol=H2AFV Histone H2A.V                                           | 9606    | 0            |
| Gene_Symbol=CST3 Cystatin-C                                               | 9606    | 1            |
| Gene_Symbol=HINT1 Histidine triad nucleotide-binding protein 1            | 9606    | 2            |
| Gene_Symbol=HINT1 9 kDa protein                                           | 9606    | 1            |
| Gene_Symbol=HINT1 9 kDa protein                                           | 9606    | 1            |
| Gene_Symbol=HINT1 12 kDa protein                                          | 9606    | 1            |
| Gene_Symbol=HINT1 7 kDa protein                                           | 9606    | 1            |
| Gene_Symbol=- Similar to Histidine triad nucleotide-binding protein 1     | 9606    | 1            |
| Gene_Symbol=KRT9 Keratin, type I cytoskeletal 9                           | 9606    | 1            |

|                                                                       |      |   |
|-----------------------------------------------------------------------|------|---|
| Gene_Symbol=HIST1H2BN Histone H2B type 1-N                            | 9606 | 1 |
| Gene_Symbol=HIST1H2BD Histone H2B                                     | 9606 | 1 |
| Gene_Symbol=HIST2H2BF histone H2B type 2-F isoform b                  | 9606 | 1 |
| Gene_Symbol=HIST1H2BE;HIST1H2BC;HIST1H2BI;HIST1H2BF;HIST1H2BG HIST1H: | 9606 | 1 |
| Gene_Symbol=HIST2H2BF Histone H2B                                     | 9606 | 1 |
| Gene_Symbol=HIST1H2BM Histone H2B type 1-M                            | 9606 | 1 |
| Gene_Symbol=H2BFS Histone H2B type F-S                                | 9606 | 1 |
| Gene_Symbol=HIST1H2BK Histone H2B type 1-K                            | 9606 | 1 |
| Gene_Symbol=HIST2H2BF Histone H2B type 2-F                            | 9606 | 1 |
| Gene_Symbol=HIST1H2BH Histone H2B type 1-H                            | 9606 | 1 |
| Gene_Symbol=HIST1H2BD Histone H2B type 1-D                            | 9606 | 1 |
| Gene_Symbol=HIST1H2BE;HIST1H2BC;HIST1H2BI;HIST1H2BF;HIST1H2BG Histone | 9606 | 1 |
| Gene_Symbol=HIST1H2BL Histone H2B type 1-L                            | 9606 | 1 |
| Gene_Symbol=HIST1H2BJ Histone H2B type 1-J                            | 9606 | 1 |
| Gene_Symbol=HIST1H2BA Histone H2B type 1-A                            | 9606 | 1 |
| Gene_Symbol=HIST1H2BB Histone H2B type 1-B                            | 9606 | 1 |
| Gene_Symbol=HIST1H2BO Histone H2B type 1-O                            | 9606 | 1 |
| Gene_Symbol=HIST2H2BE Histone H2B type 2-E                            | 9606 | 1 |
| Gene_Symbol=HIST3H2BB Histone H2B type 3-B                            | 9606 | 1 |
| Gene_Symbol=KRT10 Keratin, type I cytoskeletal 10                     | 9606 | 1 |
| Gene_Symbol=RPL23A;SNORD4A Protein                                    | 9606 | 1 |
| Gene_Symbol=RPL23A;SNORD4A Putative uncharacterized protein RPL23A    | 9606 | 1 |
| Gene_Symbol=RPL23A;SNORD4A Ribosomal protein L23a, isoform CRA_a      | 9606 | 1 |
| Gene_Symbol=- 18 kDa protein                                          | 9606 | 1 |
| Gene_Symbol=RPL23A;SNORD4A 60S ribosomal protein L23a                 | 9606 | 1 |
| Gene_Symbol=- Putative uncharacterized protein                        | 9606 | 1 |
| Gene_Symbol=CSTB Cystatin-B                                           | 9606 | 1 |

| Name                                                                       | Species | Peptides(95 |
|----------------------------------------------------------------------------|---------|-------------|
| Gene_Symbol=HIST1H4E;HIST1H4A;HIST1H4I;HIST4H4;HIST1H4F;HIST2H4A;HIST1     | 9606    | 2           |
| Gene_Symbol=MIF Macrophage migration inhibitory factor                     | 9606    | 2           |
| Gene_Symbol=B2M Beta-2-microglobulin                                       | 9606    | 1           |
| Gene_Symbol=B2M cDNA FLJ57067, highly similar to Beta-2-microglobulin      | 9606    | 1           |
| Gene_Symbol=TXN Thioredoxin                                                | 9606    | 1           |
| Gene_Symbol=TXN Thioredoxin, isoform CRA_b                                 | 9606    | 1           |
| Gene_Symbol=- 9 kDa protein                                                | 9606    | 1           |
| Gene_Symbol=RPS27 Ribosomal protein S27                                    | 9606    | 1           |
| Gene_Symbol=ERH Enhancer of rudimentary homolog                            | 9606    | 1           |
| Gene_Symbol=HIST1H1D Histone H1.3                                          | 9606    | 1           |
| Gene_Symbol=HIST1H1C Histone H1.2                                          | 9606    | 1           |
| Gene_Symbol=HIST1H1E Histone H1.4                                          | 9606    | 1           |
| Gene_Symbol=KRT1 Keratin, type II cytoskeletal 1                           | 9606    | 1           |
| Gene_Symbol=DDT 14 kDa protein                                             | 9606    | 0           |
| Gene_Symbol=DDT D-dopachrome decarboxylase                                 | 9606    | 0           |
| Gene_Symbol=- cDNA FLJ60602, moderately similar to D-dopachrome decarboxyl | 9606    | 0           |
| Gene_Symbol=- cDNA, FLJ78842, moderately similar to D-dopachrome decarboxy | 9606    | 0           |
| Gene_Symbol=DDT;DDTL Putative uncharacterized protein DDTL                 | 9606    | 0           |
| Gene_Symbol=DDT;DDTL cDNA FLJ51263, moderately similar to D-dopachrome d   | 9606    | 0           |

|                                                           |      |   |
|-----------------------------------------------------------|------|---|
| Gene_Symbol=LOC391322 similar to D-dopachrome tautomerase | 9606 | 0 |
| Gene_Symbol=DDTL D-dopachrome decarboxylase-like protein  | 9606 | 0 |
| Gene_Symbol=AVP Vasopressin-neurophysin 2-copeptin        | 9606 | 0 |

| Name                                                                          | Species | Peptides(95) |
|-------------------------------------------------------------------------------|---------|--------------|
| Gene_Symbol=KRT1 Keratin, type II cytoskeletal 1                              | 9606    | 7            |
| Gene_Symbol=KRT2 Keratin, type II cytoskeletal 2 epidermal                    | 9606    | 6            |
| Gene_Symbol=KRT10 Keratin, type I cytoskeletal 10                             | 9606    | 5            |
| Gene_Symbol=KRT9 Keratin, type I cytoskeletal 9                               | 9606    | 5            |
| Gene_Symbol=HIST1H4E;HIST1H4A;HIST1H4I;HIST4H4;HIST1H4F;HIST2H4A;HIST1        | 9606    | 2            |
| Gene_Symbol=HSPE1 10 kDa heat shock protein, mitochondrial                    | 9606    | 1            |
| Gene_Symbol=HSPE1 Putative uncharacterized protein HSPE1                      | 9606    | 1            |
| Gene_Symbol=HSPE1 Putative uncharacterized protein HSPE1                      | 9606    | 1            |
| Gene_Symbol=DCD Dermcidin isoform 2                                           | 9606    | 1            |
| Gene_Symbol=DCD Dermcidin                                                     | 9606    | 1            |
| Gene_Symbol=SNRPE Putative uncharacterized protein SNRPE                      | 9606    | 1            |
| Gene_Symbol=SNRPEL1 Putative small nuclear ribonucleoprotein polypeptide E-li | 9606    | 1            |
| Gene_Symbol=SNRPE Small nuclear ribonucleoprotein E                           | 9606    | 1            |
| Gene_Symbol=AVP Vasopressin-neurophysin 2-copeptin                            | 9606    | 0            |

| Name                                                                      | Species | Peptides(95) |
|---------------------------------------------------------------------------|---------|--------------|
| Gene_Symbol=KRT1 Keratin, type II cytoskeletal 1                          | 9606    | 7            |
| Gene_Symbol=KRT10 Keratin, type I cytoskeletal 10                         | 9606    | 5            |
| Gene_Symbol=KRT2 Keratin, type II cytoskeletal 2 epidermal                | 9606    | 6            |
| Gene_Symbol=KRT9 Keratin, type I cytoskeletal 9                           | 9606    | 2            |
| Gene_Symbol=UBB;RPS27A;UBC Ubiquitin                                      | 9606    | 1            |
| Gene_Symbol=UBB;RPS27A;UBC ubiquitin C                                    | 9606    | 1            |
| Gene_Symbol=UBB;RPS27A;UBC 19 kDa protein                                 | 9606    | 1            |
| Gene_Symbol=UBB;RPS27A;UBC 18 kDa protein                                 | 9606    | 1            |
| Gene_Symbol=UBB;RPS27A;UBC cDNA FLJ51326, highly similar to Homo sapiens  | 9606    | 1            |
| Gene_Symbol=UBB;RPS27A;UBC 21 kDa protein                                 | 9606    | 1            |
| Gene_Symbol=UBB;RPS27A;UBC 21 kDa protein                                 | 9606    | 1            |
| Gene_Symbol=UBB;RPS27A;UBC 18 kDa protein                                 | 9606    | 1            |
| Gene_Symbol=UBB;RPS27A;UBC 19 kDa protein                                 | 9606    | 1            |
| Gene_Symbol=UBB;RPS27A;UBC UBC protein                                    | 9606    | 1            |
| Gene_Symbol=UBB;RPS27A;UBC 12 kDa protein                                 | 9606    | 1            |
| Gene_Symbol=UBB;RPS27A;UBC 39 kDa protein                                 | 9606    | 1            |
| Gene_Symbol=UBB;RPS27A;UBC 25 kDa protein                                 | 9606    | 1            |
| Gene_Symbol=UBB;RPS27A;UBC 16 kDa protein                                 | 9606    | 1            |
| Gene_Symbol=UBB;RPS27A;UBC 30 kDa protein                                 | 9606    | 1            |
| Gene_Symbol=UBB;RPS27A;UBC Ubiquitin C splice variant                     | 9606    | 1            |
| Gene_Symbol=UBB;RPS27A;UBC ubiquitin B precursor                          | 9606    | 1            |
| Gene_Symbol=UBA52 ubiquitin and ribosomal protein L40 precursor           | 9606    | 1            |
| Gene_Symbol=UBB;RPS27A;UBC ubiquitin and ribosomal protein S27a precursor | 9606    | 1            |
| Gene_Symbol=- 26 kDa protein                                              | 9606    | 1            |
| Gene_Symbol=- Pseudogene candidate                                        | 9606    | 1            |
| Gene_Symbol=UBB;RPS27A;UBC Ubiquitin C                                    | 9606    | 1            |

|                                                |      |   |
|------------------------------------------------|------|---|
| Gene_Symbol=UBB;RPS27A;UBC RPS27A protein      | 9606 | 1 |
| Gene_Symbol=- 9 kDa protein                    | 9606 | 1 |
| Gene_Symbol=LOC100128355 similar to hCG1790904 | 9606 | 1 |
| Gene_Symbol=LOC100128355 similar to hCG1790904 | 9606 | 1 |



i%)

i%)

i%)

i%)

i%)

i%)

i%)

;%)

i%)

i%)

i%)









i%)

;%)









;)%)



;%)





i%)

i%)











;%)





;)%)





i%)











;%)









;)%)





i%)











i%)







i%)









i%)





i%)



i%)







i%)

i%)

;)%)

;)%)
