# Supplementary material
Source: PubMed Central journal article supplement (PMC4349970)
Supplement: supp_M114.039909_mcp.M114.039909-7.pdf [file supp_M114.039909_mcp.M114.039909-7.pdf]

**Supplemental Table S2. Peptide sequences identified by mass spectrometry.**

| Matched Protein Name                                | Peptide number                  | Peptide sequences identified by mass spectrometry                                             | Human or mouse or both (conserved) Specificity |
|-----------------------------------------------------|---------------------------------|-----------------------------------------------------------------------------------------------|------------------------------------------------|
| IGF1                                                | 694                             | R.RAPQTGIVDECCFR.S                                                                            | Conserved                                      |
| IGFL1                                               | 51                              | K.LINQNCDSAR.T                                                                                | Human                                          |
| IGFBP3                                              | 885                             | K.FLNVLSPR.G                                                                                  | Conserved                                      |
| IGFBPL1                                             | 125                             | R.CLGAEGASCGR.A                                                                               | Human                                          |
| TGF- $\beta$ 2                                      | 971                             | R.IELYQILK.S                                                                                  | Conserved                                      |
| GDF15                                               | 587, 603, 866                   | R.YEDLLTR.L; R.AALPEGLPEASR.L; R.ALFRLSPTASR.S                                                | Human                                          |
| FGF3                                                | 237                             | R.LGSQLEASAH.                                                                                 | Human                                          |
| FGF19                                               | 998                             | R.HLYTSGPHGLSSCFR.I                                                                           | Human                                          |
| FGFBP1                                              | 416, 424, 687                   | K.VVSEQKDTLGNTQIK.Q; K.VVSEQKDTLGNTQIKQK.S; R.VYWKQVAR.N                                      | Human                                          |
| PEDF                                                | 861, 1012 1672                  | R.YGLSDLSCK.I; K.TVQAVLTPK.L; K.LAAAVSNFGYDLYR.V                                              | Human (2)<br>Conserved (1)                     |
| Epididymal secretory protein-E1                     | 476                             | K.EVNVSPCPTQPCQLSK.G                                                                          | Human                                          |
| CXCL1                                               | 645                             | K.ACLNPASPIVKK.I                                                                              | Human                                          |
| Midkine                                             | 519, 667                        | K.FENWGACDGGTGTK.V; K.FENWGACDGGTGTKVR.Q                                                      | Human                                          |
| MIF                                                 | 916                             | K.LLCGLLAER.L                                                                                 | Human                                          |
| Galectin-1                                          | 372, 1441                       | WGTEQR.E; K.SFVLNLGK.D                                                                        | Human (1)<br>Conserved (1)                     |
| Galectin-3                                          | 456, 880, 981, 1157, 1179, 1557 | K.LDNNWGR.E; K.VAVNDAHLLQYNHR.V; R.GNDVAFHFNPR.F; R.IALDFQR.G; K.IQVLVEPDHFK.V; R.QSVFPFESGKP | Human (3)<br>Conserved (2)                     |
| Galectin-3-binding protein                          | 21, 312, 1052, 1303 1877        | R.LADGGATNQGR.V; K.SQLVYQSR.R; R.VEIFYR.G; K.SLGWLK.S; R.ELSEALGQIFDSQR.G                     | Human (4)<br>Conserved (1)                     |
| Osteopontin                                         | 377                             | R.ISHELDSASSEVN                                                                               | Human                                          |
| SOSTDC1                                             | 207                             | R.IQLQCQDGSTR.T                                                                               | Conserved                                      |
| SMOC2                                               | 1792                            | K.FSALTFLR.V                                                                                  | Conserved                                      |
| DKK1                                                | 124, 184, 340, 962              | R.SSDCASGLCCAR.H; K.GQEGSVCLR.S; R.CYCGEGLSCR.I; K.KGSHGLEIFQR.C                              | Human (2)<br>Conserved (2)                     |
| Chromogranin                                        | 1094                            | K.ELQDLALQGAK.E                                                                               | Conserved                                      |
| TIMP1                                               | 852                             | R.EPGLCTWQSLR.S                                                                               | Human                                          |
| TIMP2                                               | 473                             | R.SDGSCAWYR.G                                                                                 | Conserved                                      |
| Beta2-microglobulin                                 | 152, 316                        | K.IQVYSR.H; R.VNHVTLSPK.I                                                                     | Human (1)<br>Conserved (1)                     |
| mesencephalic astrocyte-derived neurotrophic factor | 1169,1255                       | R.LCYYIGATDDAATK.I; K.IINEVSKPLAHHIPVEK.I                                                     | Conserved (2)                                  |
