# Supplementary material
Source: PubMed Central journal article supplement (PMC4349970)
Supplement: supp_M114.039909_mcp.M114.039909-8.pdf [file supp_M114.039909_mcp.M114.039909-8.pdf]

**Fragment Charge States:**

- #
- +2
- +3
- > +3

**Ion Series:**

- A
- B
- C
- X
- Y
- Z

Minimum Intensity Percentile:

Fragment Mass Tolerance:

- Label peaks with m/z
- Vertical peak labels
- Label Reporter Ions
- Label Region Only

**Selected Neutral Losses**

- Label regardless of intensity
- | Mod         | Loss (+)    |
|-------------|-------------|
| H(3) O(4) P | 97.9769     |
| H O(3) P    | 79.966331   |
| Hex         | 162.0528... |
| HexNAc      | 203.0793... |

\* by mass means search for multiple losses

[View Chart](#)

**Spectral View and Peptide Fragmentation Table**

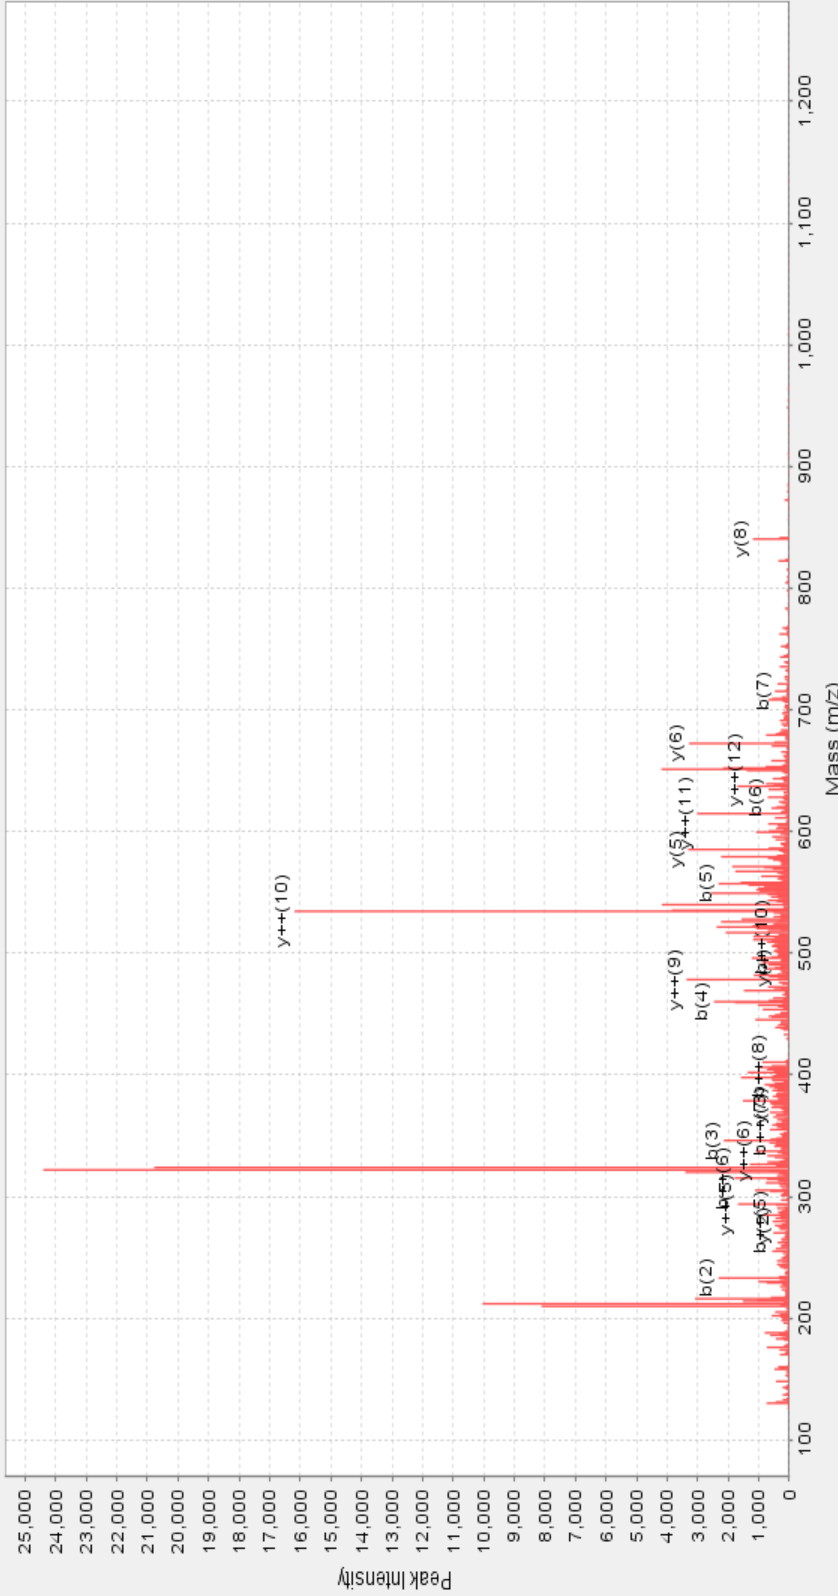

| #  | b++     | b         | Residue    | Y         | y++     | #  |
|----|---------|-----------|------------|-----------|---------|----|
| 1  | 36.526  | 72.045    | A          | 1,297.731 | 649.369 | 12 |
| 2  | 116.542 | 232.076   | C +57.0215 | 1,226.693 | 613.851 | 11 |
| 3  | 173.084 | 345.16    | L          | 1,066.663 | 533.835 | 10 |
| 4  | 230.105 | 459.203   | N          | 953.579   | 477.293 | 9  |
| 5  | 278.632 | 556.255   | P          | 839.536   | 420.272 | 8  |
| 6  | 314.15  | 627.292   | A          | 742.483   | 371.745 | 7  |
| 7  | 357.666 | 714.325   | S          | 671.446   | 336.227 | 6  |
| 8  | 406.193 | 811.377   | P          | 584.414   | 292.711 | 5  |
| 9  | 462.735 | 924.461   | I          | 487.361   | 244.184 | 4  |
| 10 | 512.269 | 1,023.53  | V          | 374.277   | 187.642 | 3  |
| 11 | 576.316 | 1,151.625 | K          | 275.209   | 138.108 | 2  |
| 12 | 640.364 | 1,279.72  | K          | 147.114   | 74.061  | 1  |

Toggle Peptide Checked

Prev Peptide

Next Peptide
