# Supplementary material
Source: PubMed Central journal article supplement (PMC4349970)
Supplement: supp_M114.039909_mcp.M114.039909-9.pdf [file supp_M114.039909_mcp.M114.039909-9.pdf]

**Fragment Charge States:**

- +1  +2
- +3  > +3

**Ion Series:**

- A  B  C
- X  Y  Z

**Minimum Intensity Percentile:**

**Fragment Mass Tolerance:**

- Label peaks with m/z
- Vertical peak labels
- Label Reporter Ions
- Label Region Only

**Selected Neutral Losses**

- Label regardless of intensity
- | Mod         | Loss (+)    |
|-------------|-------------|
| H(3) O(4) P | 97.9789     |
| H O(3) P    | 79.966331   |
| Hex         | 162.0528... |
| HexNAc      | 203.0793... |

\* by mass means search for multiple losses

[View Chart](#)

**Spectral View and Peptide Fragmentation Table**

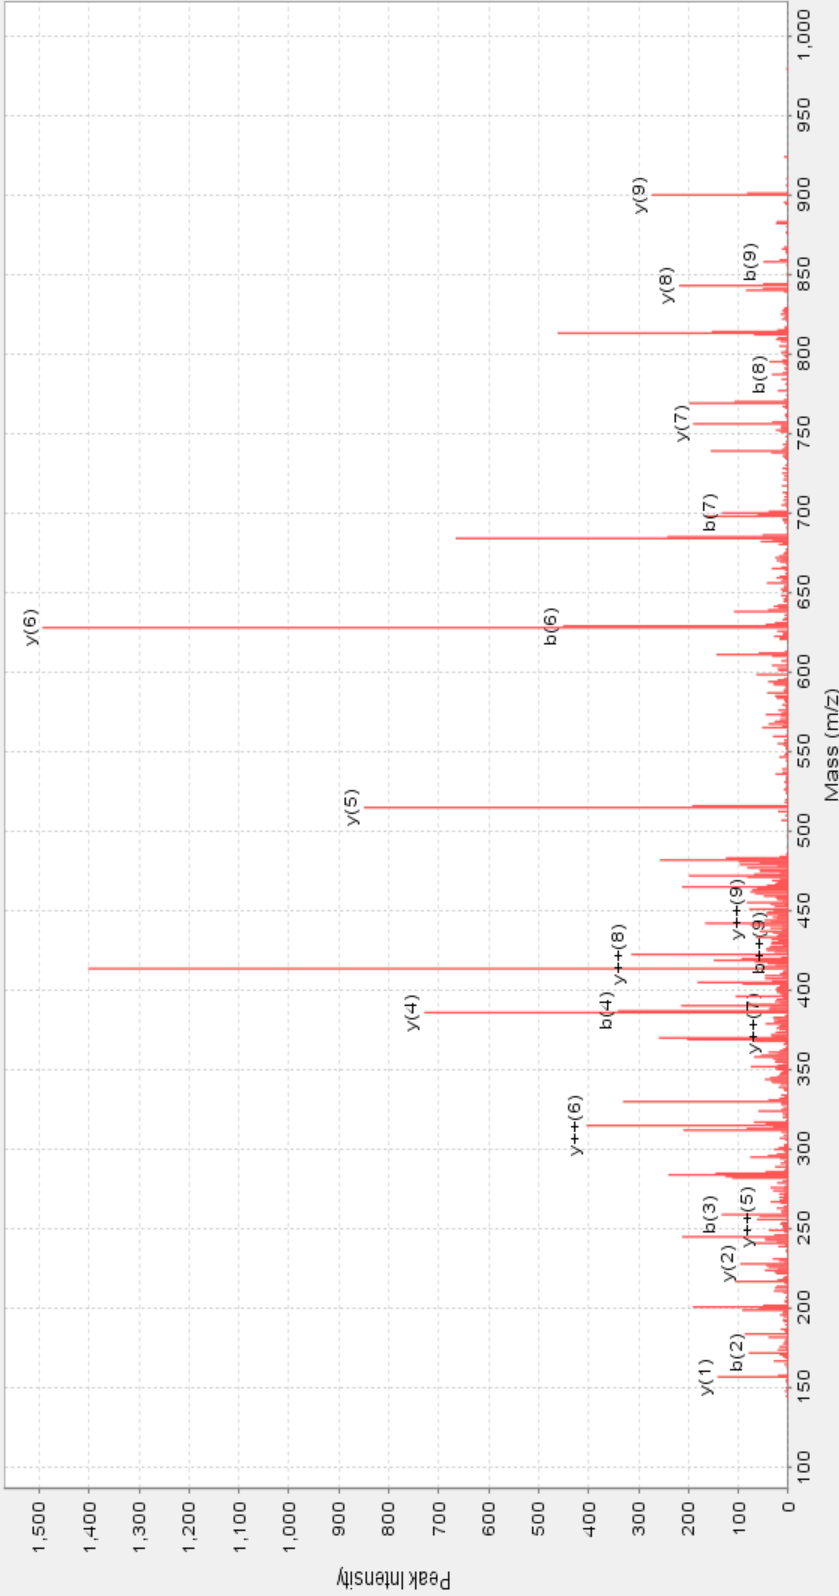

Peptide: LGSQLEASAH Precursor Mass: 506.7555

| #  | b++     | b       | Residue | Y         | y++     | #  |
|----|---------|---------|---------|-----------|---------|----|
| 1  | 57.55   | 114.092 | L       | 1,012.507 | 506.757 | 10 |
| 2  | 86.061  | 171.113 | G       | 899.423   | 450.215 | 9  |
| 3  | 129.577 | 258.145 | S       | 842.401   | 421.704 | 8  |
| 4  | 193.606 | 386.204 | Q       | 755.369   | 378.188 | 7  |
| 5  | 250.148 | 499.288 | L       | 627.311   | 314.159 | 6  |
| 6  | 314.669 | 628.331 | E       | 514.226   | 257.617 | 5  |
| 7  | 350.188 | 699.368 | A       | 385.184   | 193.096 | 4  |
| 8  | 393.704 | 786.4   | S       | 314.147   | 157.577 | 3  |
| 9  | 429.222 | 857.437 | A       | 227.115   | 114.061 | 2  |
| 10 | 497.752 | 994.496 | H       | 156.078   | 78.543  | 1  |

Toggle Peptide Checked

Prev Peptide

Next Peptide
