# Supplementary material
Source: PubMed Central journal article supplement (PMC4349970)
Supplement: supp_M114.039909_mcp.M114.039909-10.pdf [file supp_M114.039909_mcp.M114.039909-10.pdf]

**Fragment Charge States:**

- +1
- +2
- +3
- > +3

**Ion Series:**

- A
- B
- C
- X
- Y
- Z

**Minimum Intensity Percentile:**

**Fragment Mass Tolerance:**

- Label peaks with m/z
- Vertical peak labels
- Label Reporter Ions
- Label Region Only

**Selected Neutral Losses**

- Label regardless of intensity

| Mod         | Loss (+1)   |
|-------------|-------------|
| H(3) O(4) P | 97.9769     |
| H O(3) P    | 79.966331   |
| Hex         | 162.0528... |
| HexNAc      | 203.0793... |

\* by mass means search for multiple losses

[View Chart](#)

**Spectral View and Peptide Fragmentation Table**

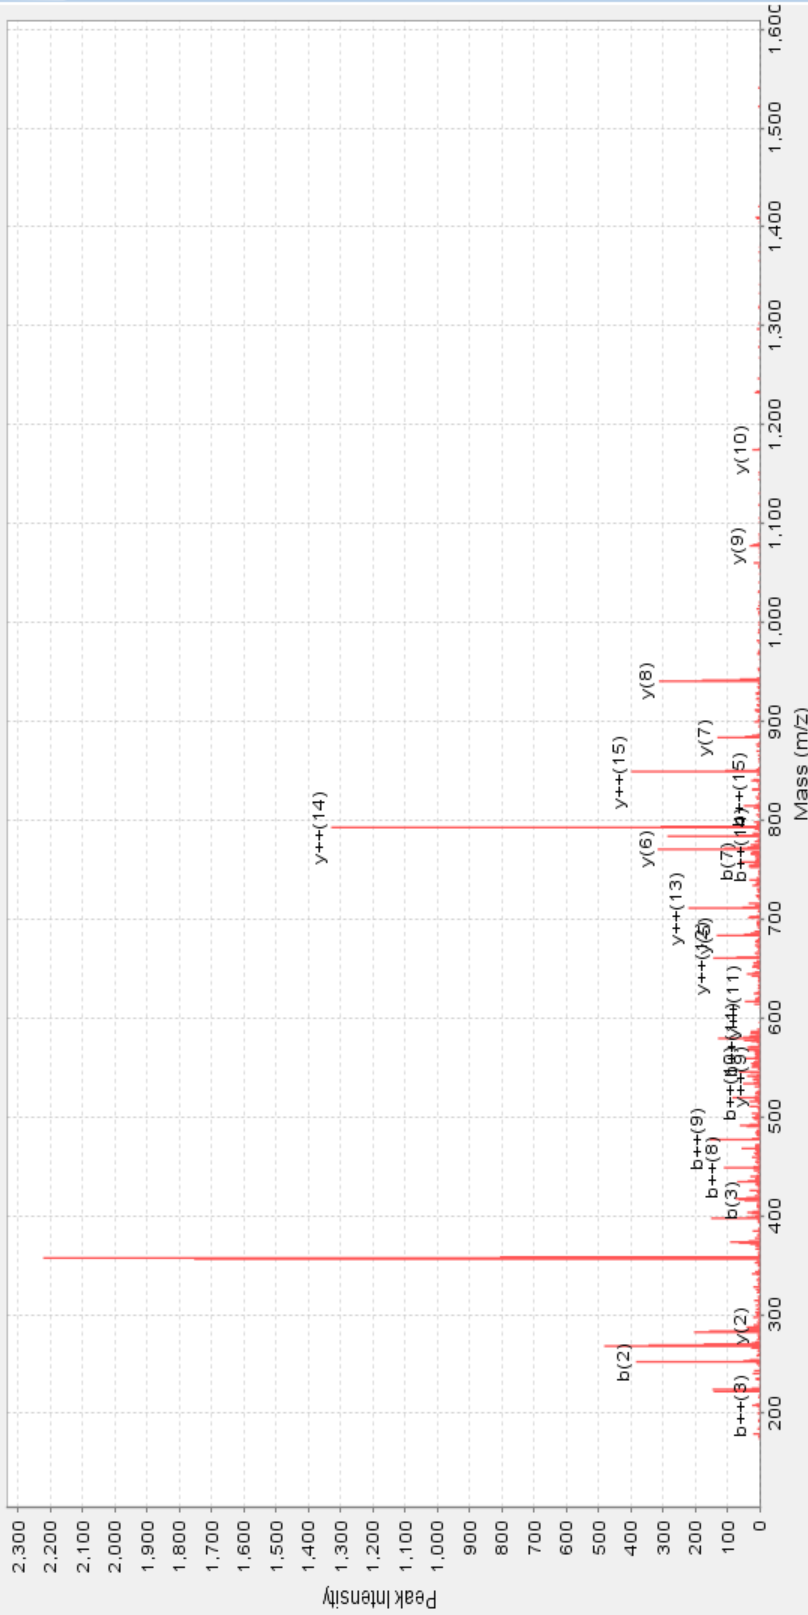

Peptide: HLYTSGPHGLSSCFLLR : Carbamidomethyl (C13) Precursor Mass: 611.3

| #  | b++     | b         | Residue    | y         | y++     | #  |
|----|---------|-----------|------------|-----------|---------|----|
| 1  | 69.537  | 138.067   | H          | 1,831.892 | 916.45  | 16 |
| 2  | 126.079 | 251.151   | L          | 1,694.833 | 847.92  | 15 |
| 3  | 207.611 | 414.214   | Y          | 1,581.749 | 791.378 | 14 |
| 4  | 258.135 | 515.262   | T          | 1,418.685 | 709.847 | 13 |
| 5  | 301.651 | 602.294   | S          | 1,317.638 | 659.323 | 12 |
| 6  | 330.162 | 659.315   | G          | 1,230.606 | 615.807 | 11 |
| 7  | 378.688 | 756.368   | P          | 1,173.584 | 587.296 | 10 |
| 8  | 447.217 | 893.427   | H          | 1,076.531 | 538.77  | 9  |
| 9  | 475.728 | 950.448   | G          | 939.473   | 470.24  | 8  |
| 10 | 532.27  | 1,063.533 | L          | 882.451   | 441.729 | 7  |
| 11 | 575.786 | 1,150.565 | S          | 769.367   | 385.187 | 6  |
| 12 | 619.302 | 1,237.597 | S          | 682.335   | 341.671 | 5  |
| 13 | 699.318 | 1,397.627 | C +57.0215 | 595.303   | 298.155 | 4  |
| 14 | 772.852 | 1,544.696 | F          | 435.272   | 218.14  | 3  |
| 15 | 829.394 | 1,657.78  | L          | 288.204   | 144.606 | 2  |
| 16 | 907.444 | 1,813.881 | R          | 175.12    | 88.064  | 1  |

Toggle Peptide Checked

Prev Peptide

Next Peptide
