# Supplementary material
Source: PubMed Central journal article supplement (PMC4349970)
Supplement: supp_M114.039909_mcp.M114.039909-11.pdf [file supp_M114.039909_mcp.M114.039909-11.pdf]

# Spectral View and Peptide Fragmentation Table

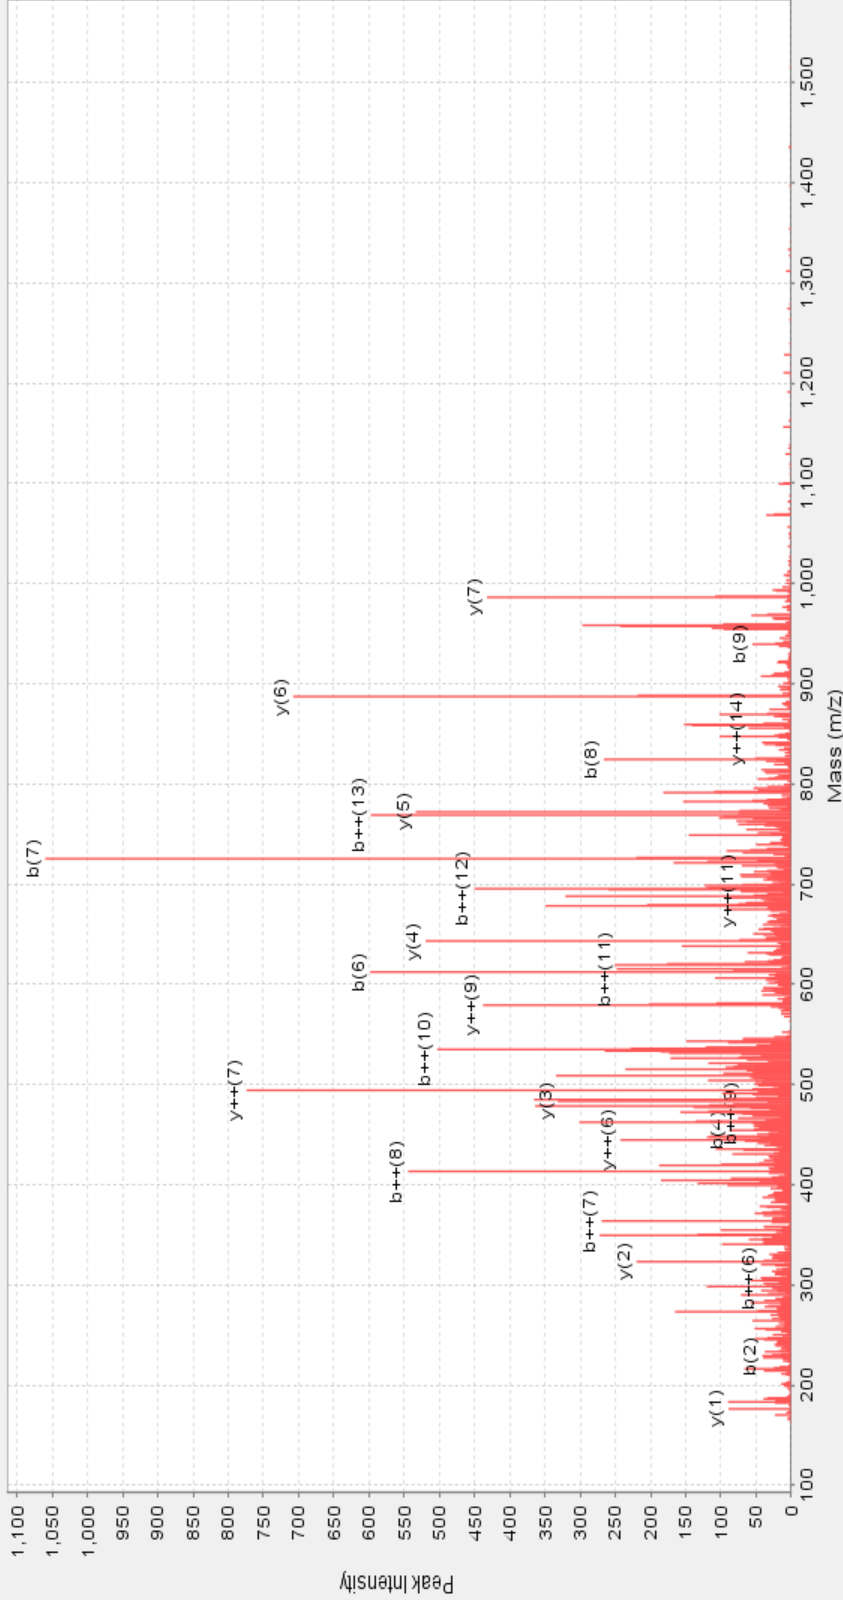

Peptide: RAPQTGIVDECCFR : Carbamidomethyl (C-11); Carbamidomethyl (C-12) Precursor Mass: 570.2684

| #  | b++     | b         | Residue    | Y         | Y++     | #  |
|----|---------|-----------|------------|-----------|---------|----|
| 1  | 79.058  | 157.109   | R          | 1,708.79  | 854.899 | 14 |
| 2  | 114.577 | 228.146   | A          | 1,552.689 | 776.849 | 13 |
| 3  | 163.103 | 325.199   | P          | 1,481.652 | 741.33  | 12 |
| 4  | 227.133 | 453.257   | Q          | 1,384.599 | 682.804 | 11 |
| 5  | 277.656 | 554.305   | T          | 1,256.541 | 628.774 | 10 |
| 6  | 306.167 | 611.327   | G          | 1,155.493 | 578.25  | 9  |
| 7  | 362.709 | 724.411   | I          | 1,098.472 | 549.74  | 8  |
| 8  | 412.243 | 823.479   | V          | 985.388   | 493.198 | 7  |
| 9  | 469.757 | 938.506   | D          | 886.319   | 443.663 | 6  |
| 10 | 534.278 | 1,067.549 | E          | 771.292   | 386.15  | 5  |
| 11 | 614.294 | 1,227.579 | C +57.0215 | 642.25    | 321.629 | 4  |
| 12 | 694.309 | 1,387.61  | C +57.0215 | 482.219   | 241.613 | 3  |
| 13 | 767.843 | 1,534.678 | F          | 322.188   | 161.598 | 2  |
| 14 | 845.894 | 1,690.779 | R          | 175.12    | 88.064  | 1  |

**Fragment Charge States:**  
 +1  +2  
 +3  > +3

**Ion Series:**  
 A  B  C  
 X  Y  Z

**Minimum Intensity Percentile:** 75  
**Fragment Mass Tolerance:** 0.5

Label peaks with m/z  
 Vertical peak labels  
 Label Reporter Ions  
 Label Region Only

**Selected Neutral Losses**

| Mod         | Loss (+1)   |
|-------------|-------------|
| H(3) O(4) P | 97.9769     |
| H O(3) P    | 79.966331   |
| Hex         | 162.0528... |
| HexNAc      | 203.0793... |

\* by mass means search for multiple losses

[View Chart](#)

Toggle Peptide Checked

Prev Peptide

Next Peptide
