# Supplementary material
Source: PubMed Central journal article supplement (PMC4349970)
Supplement: supp_M114.039909_mcp.M114.039909-12.pdf [file supp_M114.039909_mcp.M114.039909-12.pdf]

**Fragment Charge States:**

- #
- +2
- +3
- > +3

**Ion Series:**

- A
- B
- C
- X
- Y
- Z

**Minimum Intensity Percentile:**

**Fragment Mass Tolerance:**

- Label peaks with m/z
- Vertical peak labels
- Label Reporter Ions
- Label Region Only

**Selected Neutral Losses**

- Label regardless of intensity
- | Mod         | Loss (+)    |
|-------------|-------------|
| H(3) O(4) P | 97.9769     |
| H O(3) P    | 79.966331   |
| Hex         | 162.0528... |
| HexNAc      | 203.0793... |

\* by mass means search for multiple losses

[View Chart](#)

**Spectral View and Peptide Fragmentation Table**

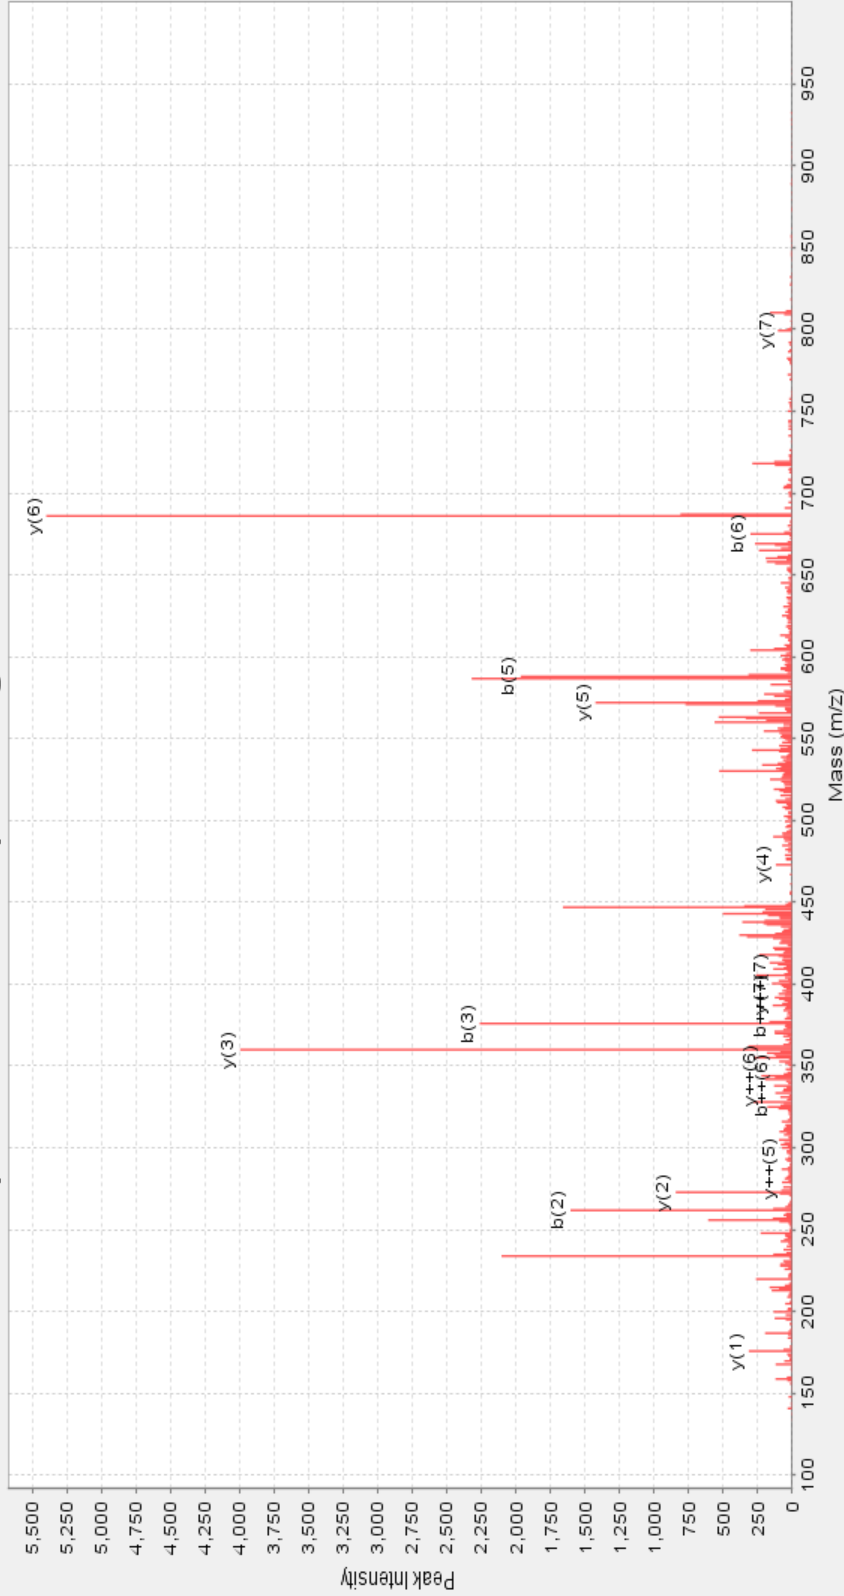

Peptide: FLNVLSPR Precursor Mass: 473.2799

| # | b++     | b       | Residue | Y       | Y++     | # |
|---|---------|---------|---------|---------|---------|---|
| 1 | 74.542  | 148.076 | F       | 945.553 | 473.28  | 8 |
| 2 | 131.084 | 261.16  | L       | 798.484 | 399.746 | 7 |
| 3 | 188.106 | 375.203 | N       | 685.4   | 343.204 | 6 |
| 4 | 237.64  | 474.272 | V       | 571.357 | 286.182 | 5 |
| 5 | 294.182 | 587.356 | L       | 472.289 | 236.648 | 4 |
| 6 | 337.698 | 674.388 | S       | 359.205 | 180.106 | 3 |
| 7 | 386.224 | 771.441 | P       | 272.173 | 136.59  | 2 |
| 8 | 464.275 | 927.542 | R       | 175.12  | 88.064  | 1 |

Toggle Peptide Checked

Prev Peptide

Next Peptide
