# Supplementary material
Source: PubMed Central journal article supplement (PMC4349970)
Supplement: supp_M114.039909_mcp.M114.039909-13.pdf [file supp_M114.039909_mcp.M114.039909-13.pdf]

**Fragment Charge States:**

- #
- +2
- +3
- +3

**Ion Series:**

- A
- B
- C
- X
- Y
- Z

**Minimum Intensity Percentile:**

**Fragment Mass Tolerance:**

- Label peaks with m/z
- Vertical peak labels
- Label Reporter Ions
- Label Region Only

**Selected Neutral Losses**

- Label regardless of intensity
- | Mod         | Loss (+)    |
|-------------|-------------|
| H(3) O(4) P | 97.9769     |
| H O(3) P    | 79.966331   |
| Hex         | 162.0528... |
| HexNAc      | 203.0793... |

\* by mass means search for multiple losses

[View Chart](#)

**Spectral View and Peptide Fragmentation Table**

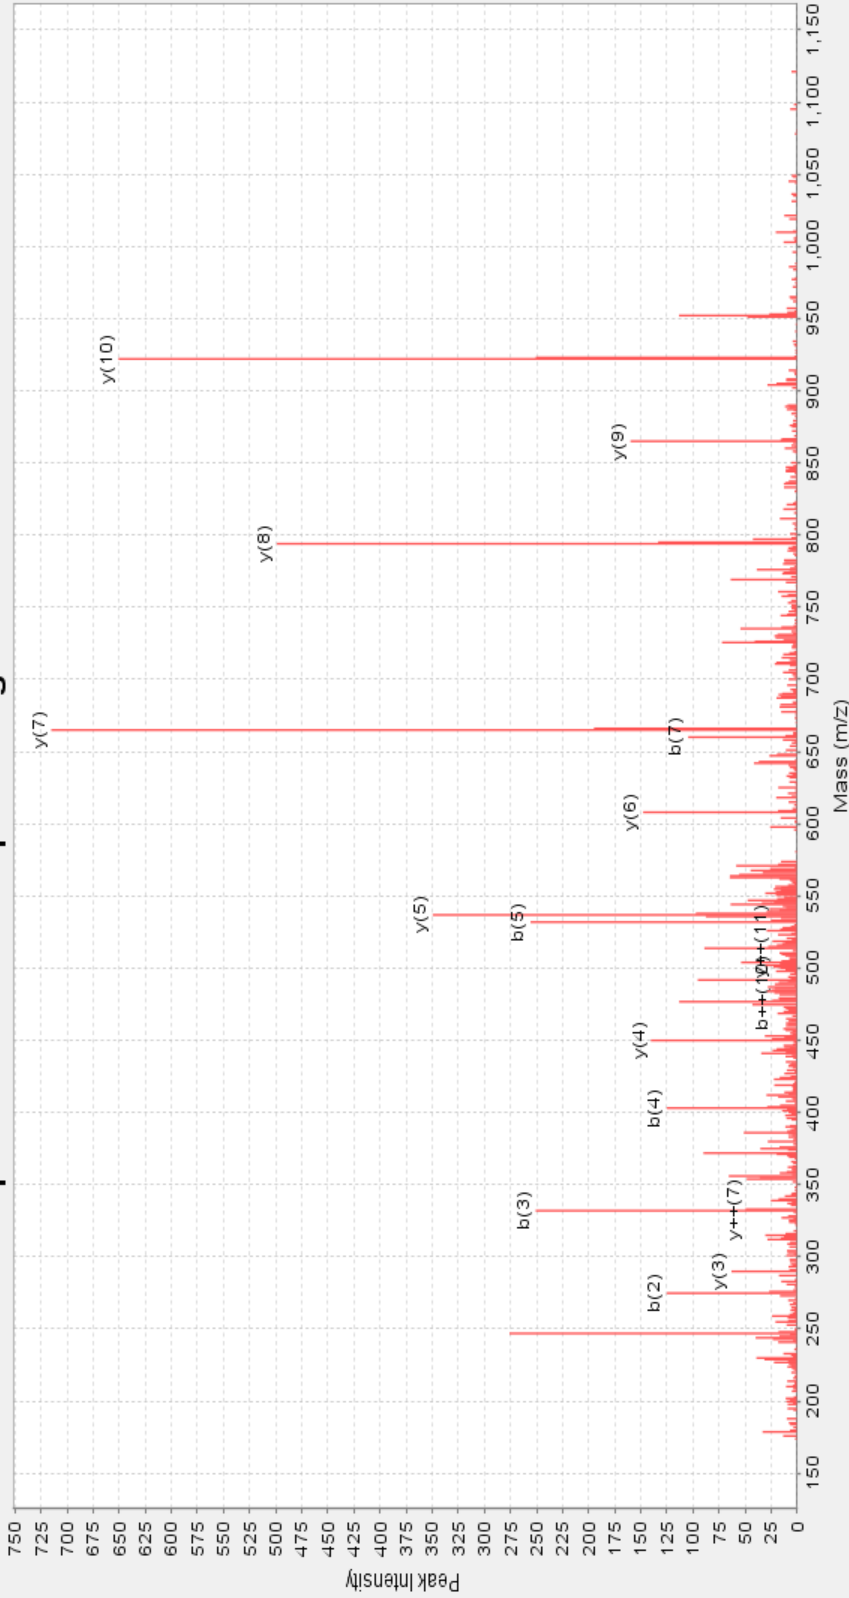

Peptide: CLGAEGASCGRG : Carbamidomethyl (C-1); Carbamidomethyl (C-9) Precursor Mass: 597.7524

| #  | b++     | b         | Residue    | Y         | Y++     | #  |
|----|---------|-----------|------------|-----------|---------|----|
| 1  | 81.023  | 161.038   | C +57.0215 | 1,194.5   | 597.754 | 12 |
| 2  | 137.565 | 274.123   | L          | 1,034.469 | 517.739 | 11 |
| 3  | 166.076 | 331.144   | G          | 921.385   | 461.197 | 10 |
| 4  | 201.594 | 402.181   | A          | 864.364   | 432.686 | 9  |
| 5  | 266.116 | 531.224   | E          | 793.327   | 397.167 | 8  |
| 6  | 294.627 | 588.245   | G          | 664.284   | 332.646 | 7  |
| 7  | 330.145 | 659.282   | A          | 607.263   | 304.135 | 6  |
| 8  | 373.661 | 746.314   | S          | 536.225   | 268.617 | 5  |
| 9  | 453.676 | 906.345   | C +57.0215 | 449.193   | 225.101 | 4  |
| 10 | 482.187 | 963.366   | G          | 289.163   | 145.085 | 3  |
| 11 | 510.698 | 1,020.388 | G          | 232.141   | 116.575 | 2  |
| 12 | 588.748 | 1,176.489 | R          | 175.12    | 88.064  | 1  |

Toggle Peptide Checked

Prev Peptide

Next Peptide
