# Supplementary material
Source: PubMed Central journal article supplement (PMC4349970)
Supplement: supp_M114.039909_mcp.M114.039909-14.pdf [file supp_M114.039909_mcp.M114.039909-14.pdf]

**Fragment Charge States:**

- #
- +2
- +3
- > +3

**Ion Series:**

- A
- B
- C
- X
- Y
- Z

**Minimum Intensity Percentile:**

**Fragment Mass Tolerance:**

- Label peaks with m/z
- Vertical peak labels
- Label Reporter Ions
- Label Region Only

**Selected Neutral Losses**

- Label regardless of intensity
- | Mod         | Loss (+)    |
|-------------|-------------|
| H(3) O(4) P | 97.9769     |
| H O(3) P    | 79.966331   |
| Hex         | 162.0528... |
| HexNAc      | 203.0793... |

\* by mass means search for multiple losses

[View Chart](#)

**Spectral View and Peptide Fragmentation Table**

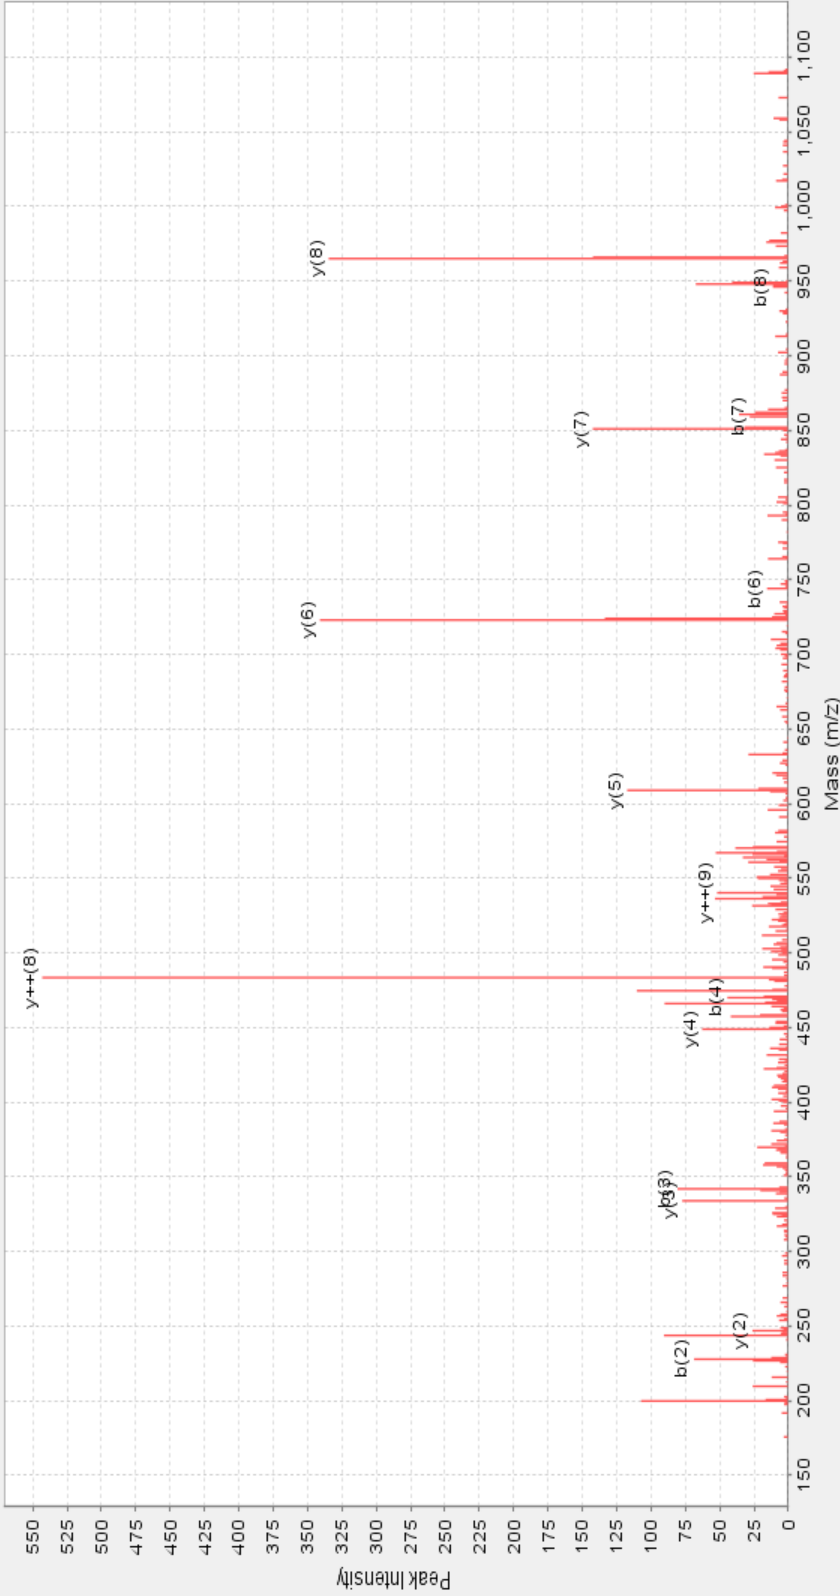

Peptide: LINQNCD SAR : Carbamidomethyl (C6) Precursor Mass: 595.7822

| #  | b+++    | b         | Residue    | Y         | Y++     | #  |
|----|---------|-----------|------------|-----------|---------|----|
| 1  | 57.55   | 114.092   | L          | 1,190.559 | 595.783 | 10 |
| 2  | 114.092 | 227.176   | I          | 1,077.475 | 539.241 | 9  |
| 3  | 171.113 | 341.219   | N          | 964.391   | 482.699 | 8  |
| 4  | 235.143 | 469.277   | Q          | 850.348   | 425.678 | 7  |
| 5  | 292.164 | 583.32    | N          | 722.29    | 361.649 | 6  |
| 6  | 372.179 | 743.351   | C +57.0215 | 608.247   | 304.627 | 5  |
| 7  | 429.693 | 858.378   | D          | 448.216   | 224.612 | 4  |
| 8  | 473.209 | 945.41    | S          | 333.189   | 167.098 | 3  |
| 9  | 508.727 | 1,016.447 | A          | 246.157   | 123.582 | 2  |
| 10 | 586.778 | 1,172.548 | R          | 175.12    | 88.064  | 1  |

Toggle Peptide Checked

Prev Peptide

Next Peptide
