# Supplementary material
Source: PubMed Central journal article supplement (PMC4349970)
Supplement: supp_M114.039909_mcp.M114.039909-15.pdf [file supp_M114.039909_mcp.M114.039909-15.pdf]

**Fragment Charge States:**

- +1  +2
- +3  > +3

**Ion Series:**

- A  B  C
- X  Y  Z

**Minimum Intensity Percentile:**

**Fragment Mass Tolerance:**

- Label peaks with m/z
- Vertical peak labels
- Label Reporter Ions
- Label Region Only

**Selected Neutral Losses**

- Label regardless of intensity
- | Mod         | Loss (+)    |
|-------------|-------------|
| H(3) O(4) P | 97.9789     |
| H O(3) P    | 79.966331   |
| Hex         | 162.0528... |
| HexNAc      | 203.0793... |

\* by mass means search for multiple losses

[View Chart](#)

**Spectral View and Peptide Fragmentation Table**

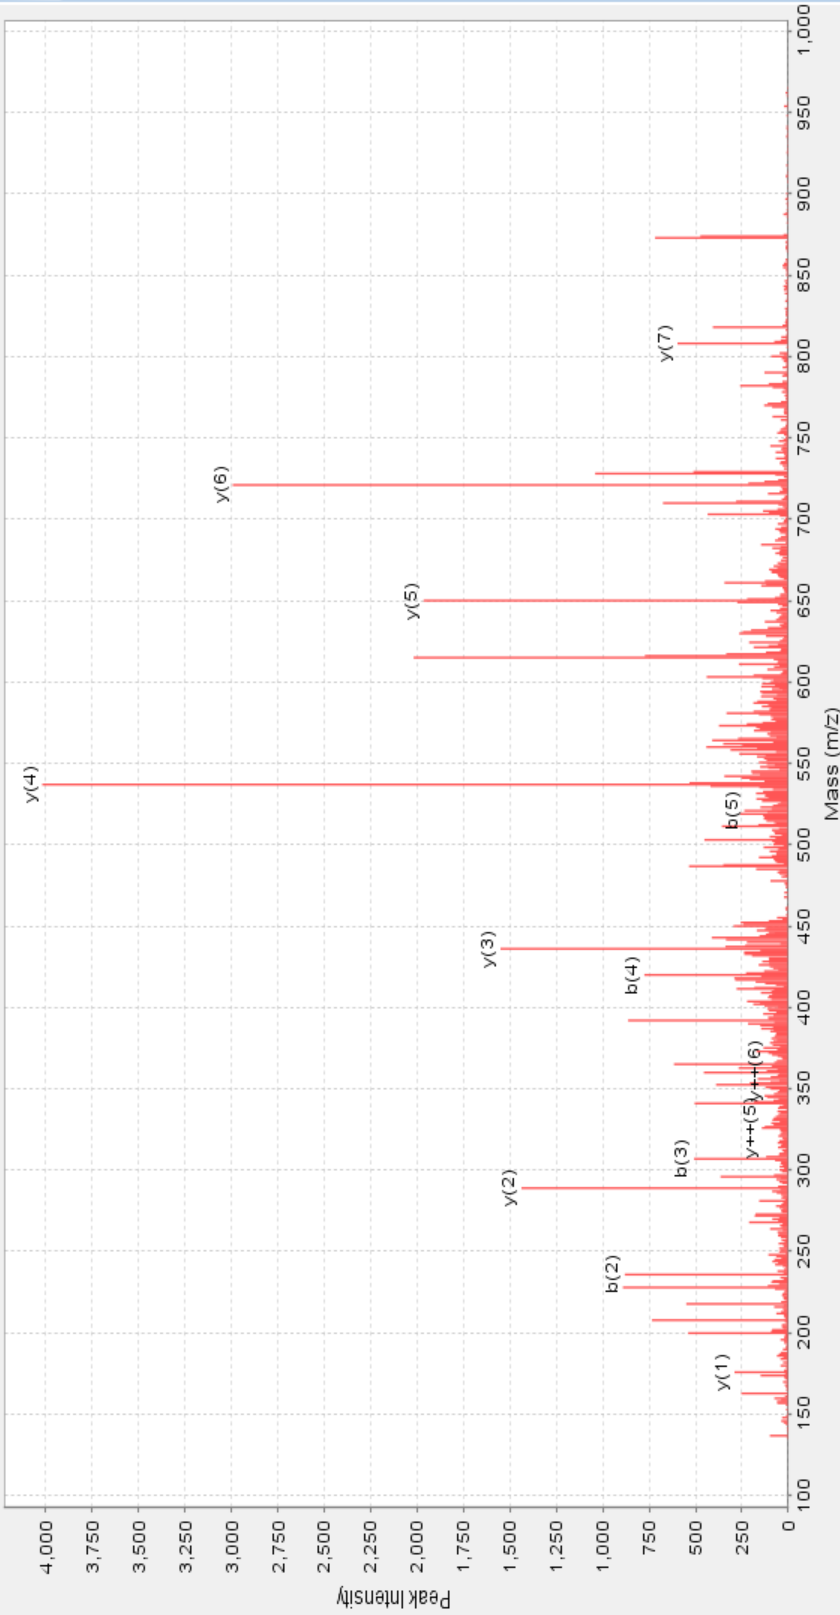

Peptide: FSALTFLR Precursor Mass: 477.7742

| # | b++     | b       | Residue | y       | y++     | # |
|---|---------|---------|---------|---------|---------|---|
| 1 | 74.542  | 148.076 | F       | 954.542 | 477.775 | 8 |
| 2 | 118.058 | 235.108 | S       | 807.473 | 404.241 | 7 |
| 3 | 153.577 | 306.145 | A       | 720.441 | 360.725 | 6 |
| 4 | 210.119 | 419.229 | L       | 649.404 | 325.206 | 5 |
| 5 | 260.642 | 520.277 | T       | 536.32  | 268.664 | 4 |
| 6 | 334.177 | 667.346 | F       | 435.272 | 218.14  | 3 |
| 7 | 390.719 | 780.43  | L       | 288.204 | 144.606 | 2 |
| 8 | 468.769 | 936.531 | R       | 175.12  | 88.064  | 1 |

Toggle Peptide Checked

Prev Peptide

Next Peptide
